# Supplementary material
Source: PubMed Central journal article supplement (PMC7376576)

# Modulating Heparanase Activity: Tuning Sulfation Pattern and Glycosidic Linkage of Oligosaccharides

**Authors:** Sanyong Zhu,<sup>1</sup> Jiayi Li,<sup>1</sup> Ravi S. Loka,<sup>1</sup> Zhenfeng Song,<sup>3</sup> Israel Vlodavsky,<sup>2</sup> Kezhong Zhang,<sup>3</sup> and Hien M. Nguyen<sup>\*,1,#ID</sup>

## Affiliations:

<sup>1</sup> Department of Chemistry, Wayne State University, Detroit, Michigan 48202, United States

<sup>2</sup> Cancer and Vascular Biology Research Center, Rappaport Faculty of Medicine, Technion, Haifa 31096, Israel

<sup>3</sup> Center for Molecular Medicine and Genetics, Wayne State University School of Medicine, Detroit, Michigan, 48201, United States

## Table of Contents

|                                                                                 |     |
|---------------------------------------------------------------------------------|-----|
| 1. General Information.....                                                     | S2  |
| 2. Synthetic Schemes of Monosaccharide Building Blocks and Trisaccharides ..... | S3  |
| 3. TR-FRET Heparanase Inhibition Assay .....                                    | S6  |
| 4. Hydrolysis Assay .....                                                       | S7  |
| 5. Two-Stage Chromogenic Assay to Evaluate Anticoagulant Activity.....          | S8  |
| 6. Platelet Factor 4 Binding Test by Biolayer Interferometry (BLI) Assay.....   | S10 |
| 7. Inhibition of ECM Degradation Assay .....                                    | S13 |
| 8. Inhibition of Heparanase in Pancreatic $\beta$ Cells.....                    | S13 |
| 9. Computational study .....                                                    | S14 |
| 10. Reference .....                                                             | S30 |
| 11. Mass Spectra .....                                                          | S32 |
| 12. NMR Data.....                                                               | S49 |

\*Correspondence to: [hmnguyen@wayne.edu](mailto:hmnguyen@wayne.edu)

## 1. General Information

**Methods and Reagents.** All reactions were performed in oven-dried flasks fitted with septa under a positive pressure of nitrogen atmosphere. Organic solutions were concentrated using a Buchi rotary evaporator below 40 °C at 25 torr. Analytical thin-layer chromatography was routinely utilized to monitor the progress of the reactions and performed using pre-coated glass plates with 230-400 mesh silica gel impregnated with a fluorescent indicator (250 nm). Visualization was then achieved using UV light, iodine, or ceric ammonium molybdate. Flash column chromatography was performed using 40-63  $\mu\text{m}$  silica gel (SiliaFlash F60 from Silicycle). Dry solvents were obtained from a SG Waters solvent system utilizing activated alumina columns under an argon pressure. All other commercial reagents were used as received from Sigma Aldrich, Alfa Aesar, Acros Organics, TCI, and Combi-Blocks, unless otherwise noted.

**Instrumentation.** All new compounds were characterized by Nuclear Magnetic Resonance (NMR) spectroscopy and High-Resolution Mass spectrometry (HRMS). All  $^1\text{H}$  NMR spectra were recorded on either Agilent 400 or 600 MHz spectrometers. All  $^{13}\text{C}$  NMR spectra were recorded on either Agilent 100 or 150 MHz spectrometer. Chemical shifts are expressed in parts per million ( $\delta$  scale) referenced to the residual proton in the NMR solvent ( $\text{CDCl}_3$ :  $\delta$  7.26 ppm,  $\delta$  77.16 ppm). Data are presented as follows: chemical shift, multiplicity (s = singlet, d = doublet, t = triplet, q = quartet, m = multiplet, and bs = broad singlet), integration, and coupling constant in hertz (Hz).

High resolution mass spectra (HRMS) were recorded using a Micromass LCT Premier XE instrument (Waters) and were determined by electrospray ionization (ESI).

## 2. Modular Synthetic Scheme of Trisaccharides and Monosaccharide Building Blocks

### 2.1. Synthetic summary

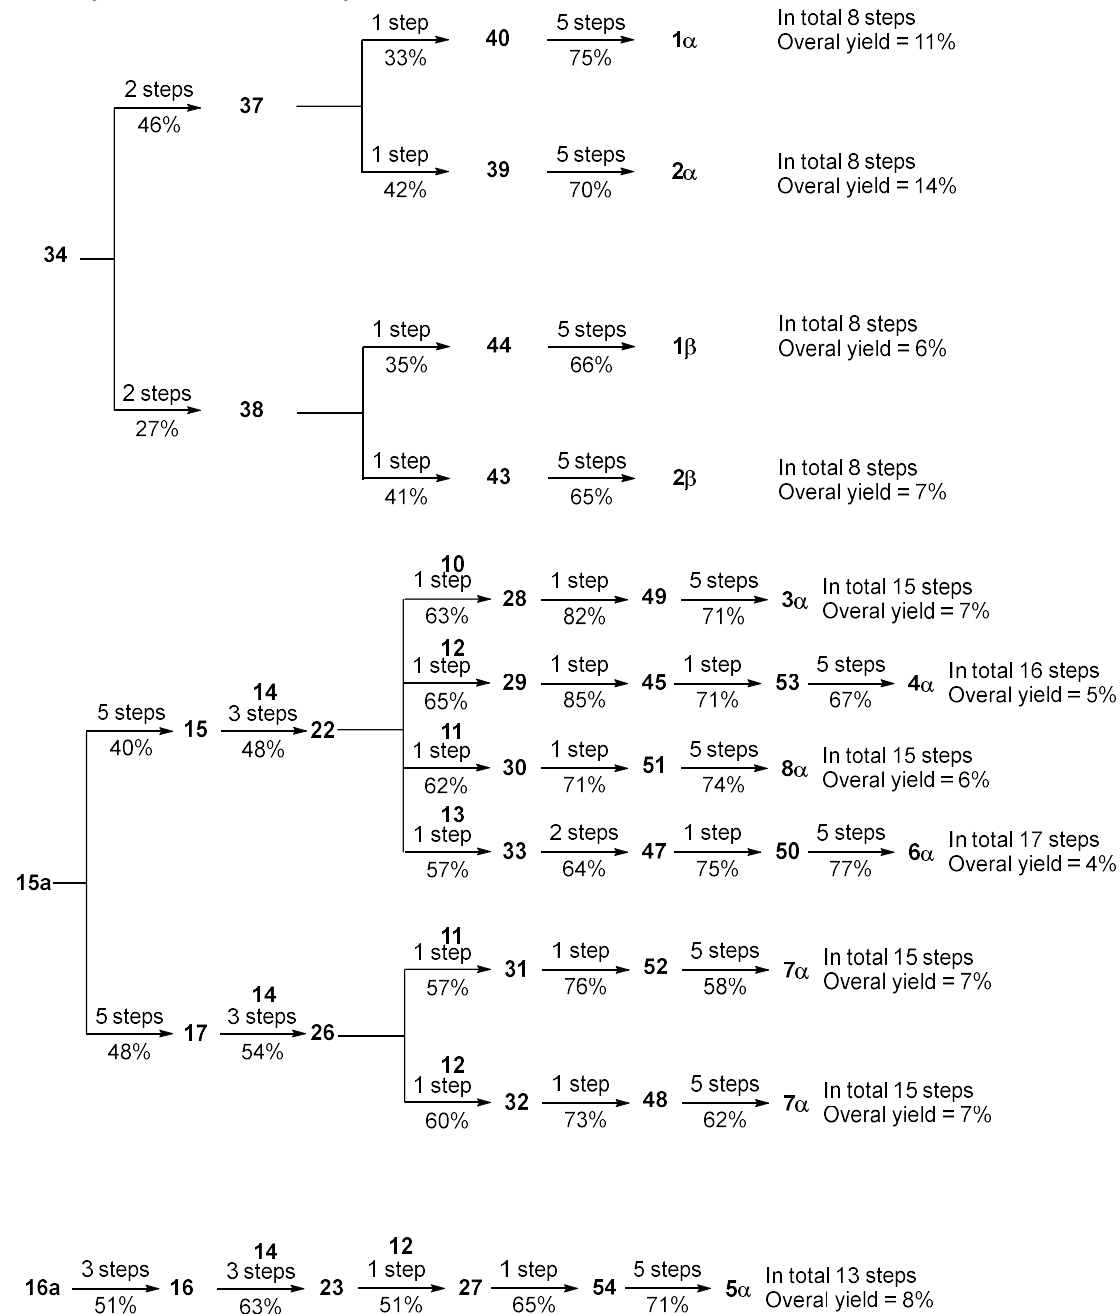

## 2.2. General Synthetic Schemes for Monosaccharide Building Blocks Preparation

### *p*-Tolyl 2-azido-2-deoxy-3-*O*-(2-naphthylmethyl)-4-*O*-benzyl-6-*O*-(*p*-methoxybenzyl)-1-thio- $\alpha$ -D-glucopyranoside (11):

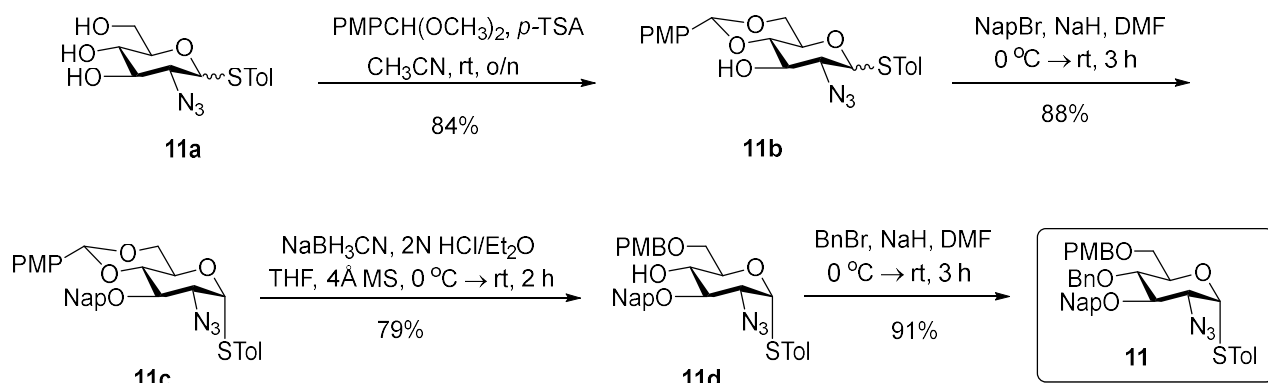

### Phenyl 2-azido-2-deoxy-3,4-di-*O*-benzyl-6-*O*-(2-naphthylmethyl)-1-thio-D-glucopyranoside (12):

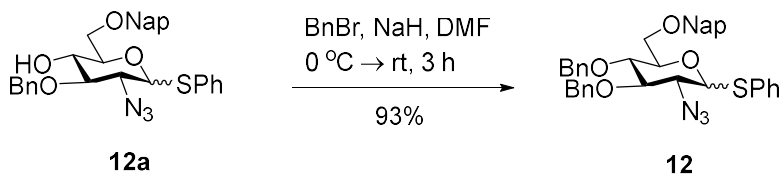

### 2-*N*-[(2-trifluoromethyl)benzylidene]-2-deoxy-3,4-di-*O*-benzyl-6-*O*-(2-naphthylmethyl)-D-glucopyranosyl *N*-phenyl-trifluoroacetimidate (13):

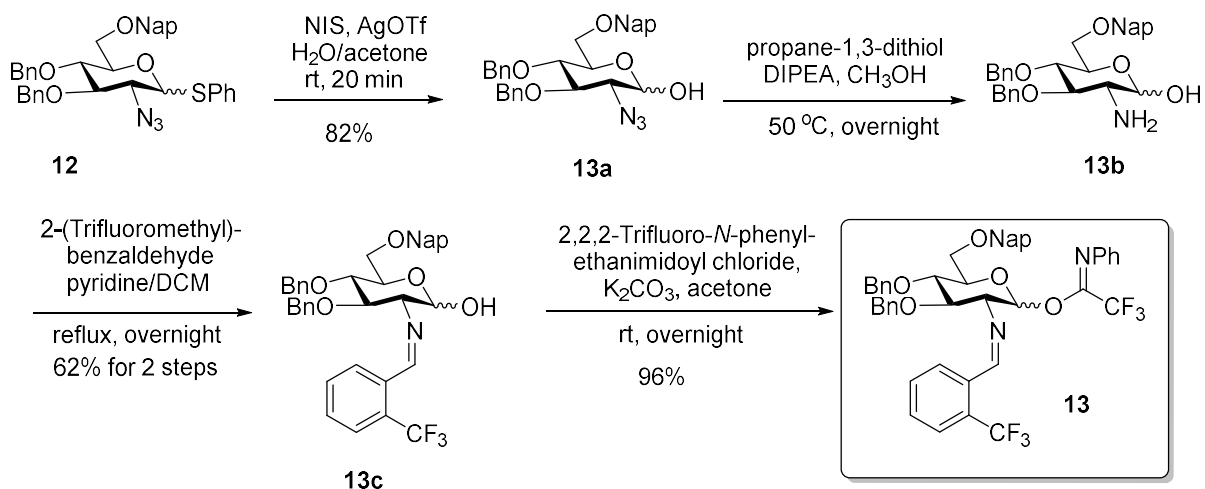

**2-Azidoethyl 2-azido-2-deoxy-3-*O*-benzyl-6-*O*-(2-naphthylmethyl)- $\alpha$ -D-glucopyranoside (15):**

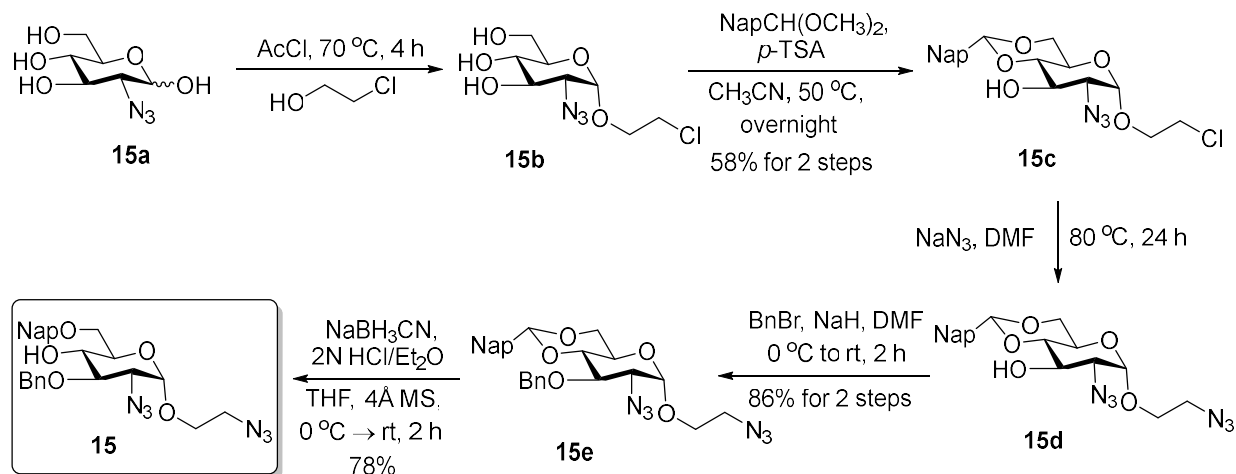

**2-Azidoethyl 2-acetamido-2-deoxy-3-*O*-benzyl-6-*O*-(2-naphthylmethyl)- $\alpha$ -D-glucopyranoside (16):**

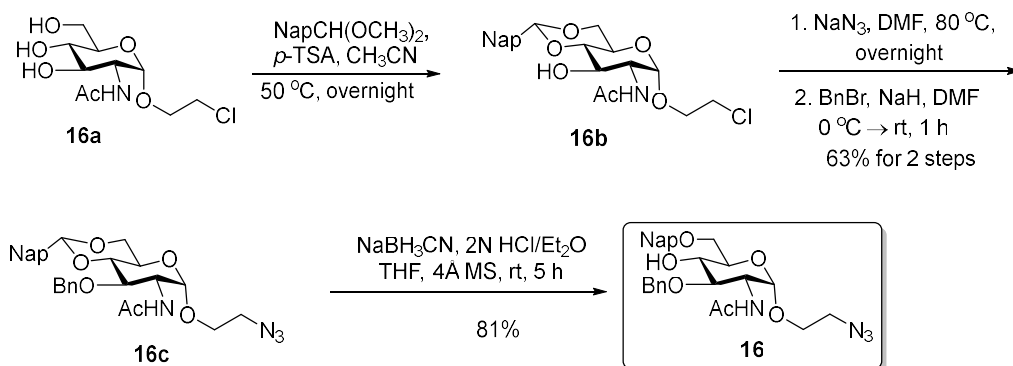

**2-Azidoethyl 2-azido-2-deoxy-3-*O*-(2-naphthylmethyl)-6-*O*-(*p*-methoxybenzyl)- $\alpha$ -D-glucopyranoside (17):**

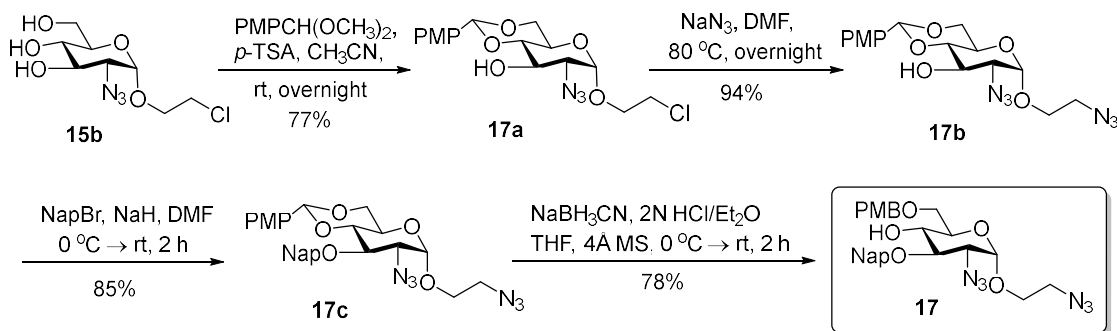

### 3. TR-FRET Heparanase Inhibition Assay<sup>1</sup>

42  $\mu\text{L}$  of HS trisaccharide solution in Milli-Q water (0.0038-500  $\mu\text{M}$ ) or just Milli-Q water (as a control), and 42  $\mu\text{L}$  of heparanase (5.3 nM, R&D Systems) solution in pH 7.5 triz buffer (consisting of 20 mM TrisHCl, 0.15 M NaCl and 0.1% CHAPS) or just buffer as blank were added into microtubes and pre-incubated at 37  $^{\circ}\text{C}$  for 10 min bringing the [heparanase] to 0.5 nM. Next, 84  $\mu\text{L}$  of biotin-heparan sulfate-Eu cryptate (Cisbio, Cat #: 61BHSKAA) (58.6 ng in pH 5.5 0.2 M NaOAc buffer) was added to the microtubes, and the resulting mixture was incubated for 60 min at 37  $^{\circ}\text{C}$ . The reaction mixture was stopped by adding 168  $\mu\text{L}$  of Streptavidin-XLent! (Cisbio, Cat #: 611SAXLA) (1.0  $\mu\text{g}/\text{ml}$ ) solution in pH 7.5 dilution buffer made of 0.1 M  $\text{NaH}_2\text{PO}_4$ , 0.8 M KF, 0.1% BSA. After the mixture had been stirring at room temperature for 15 min, 100  $\mu\text{L}$  (per well) of the reaction mixture was transferred to a 96 well microplate (Corning #3693 96 well, white polystyrene, half-area) in triplicates and HTRF emissions at 616 nm and 665 nm were measured by exciting at 340 nm using a SpectraMax iD5 Microplate Reader (Molecular Devices).

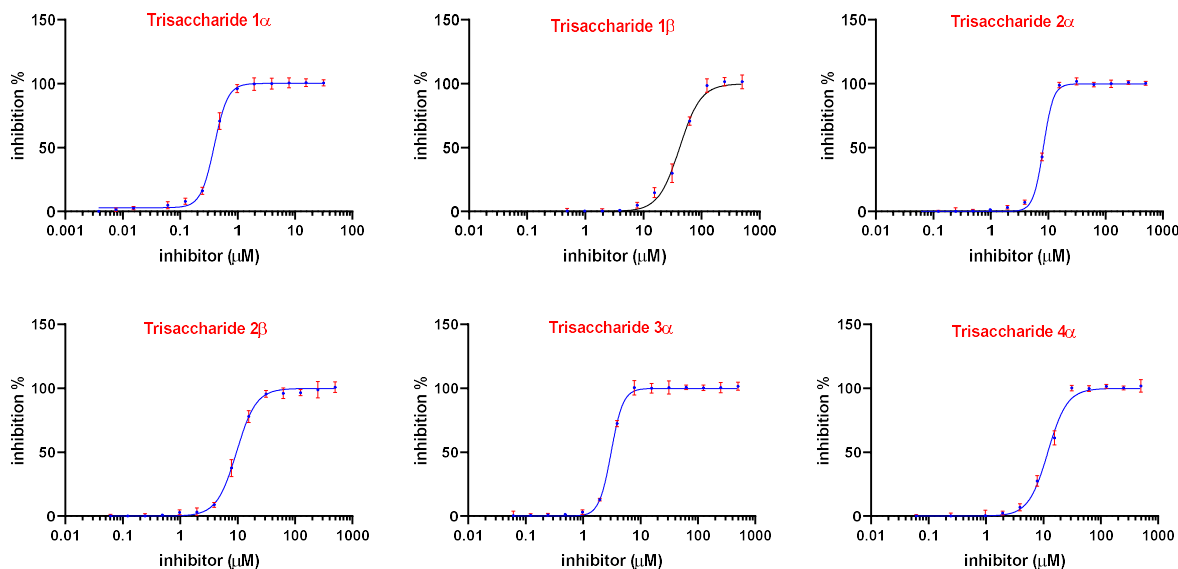

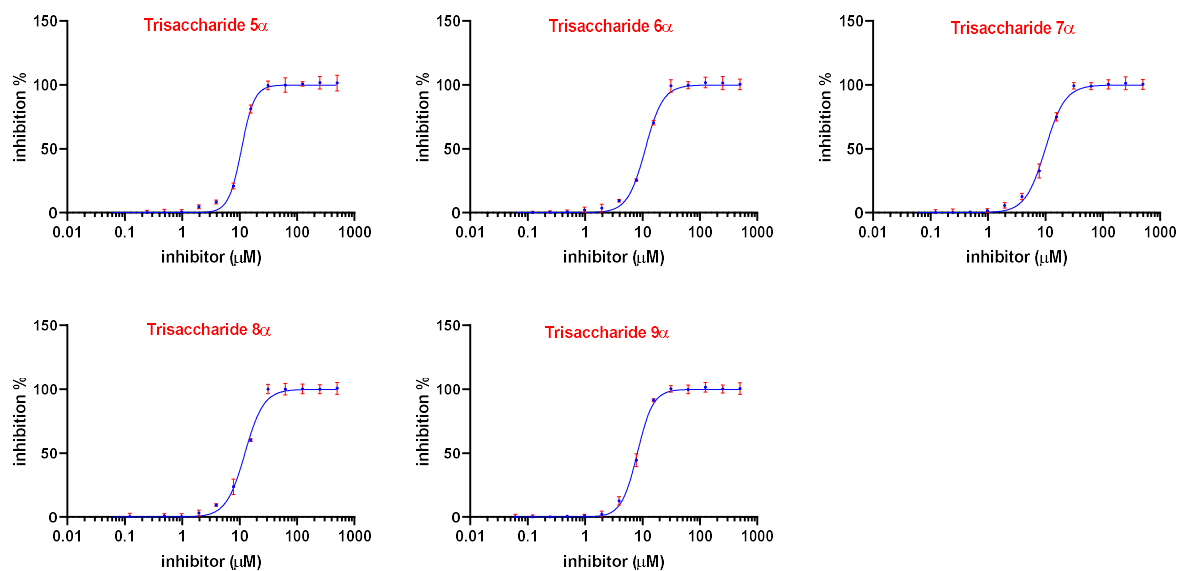

**Figure S1.** Inhibition of heparanase by different trisaccharide ligands.

#### 4. Trisaccharides Hydrolysis Assay<sup>2</sup>

Micro centrifuge tubes were pretreated for 2h at 37 °C by using a solution of phosphate buffered saline comprising of 0.05% Tween 20 (PBST) and 4% bovine serum albumin. Tubes were then washed three times with PBST, dried, stored at 4 °C, and used for assay within a week. A 100  $\mu$ M solution of fondaparinux or trisaccharide with heparanase enzyme (3 nM) in pH 5.0 sodium acetate buffer (40 mM) were incubated at 37 °C in a microtube. The enzymatic reaction was stopped at different time points by adding equal volumes of reaction mixture and freshly made 1.69 mM WST-1 (Toronto Research Chemicals) in 0.1 M NaOH into a new microtube and developed at 60 °C for 60 min. A 200  $\mu$ l (per well) solution of developed reaction solution was transferred to a clear 96-well microplate in triplicates and absorbance was measured at 584 nm with a SpectraMax iD5 Microplate Reader (Molecular Devices). For the controls, exactly the same procedure was followed for a 100  $\mu$ M solution of trisaccharides without heparanase enzyme to rationalize non-enzymatic autohydrolysis.

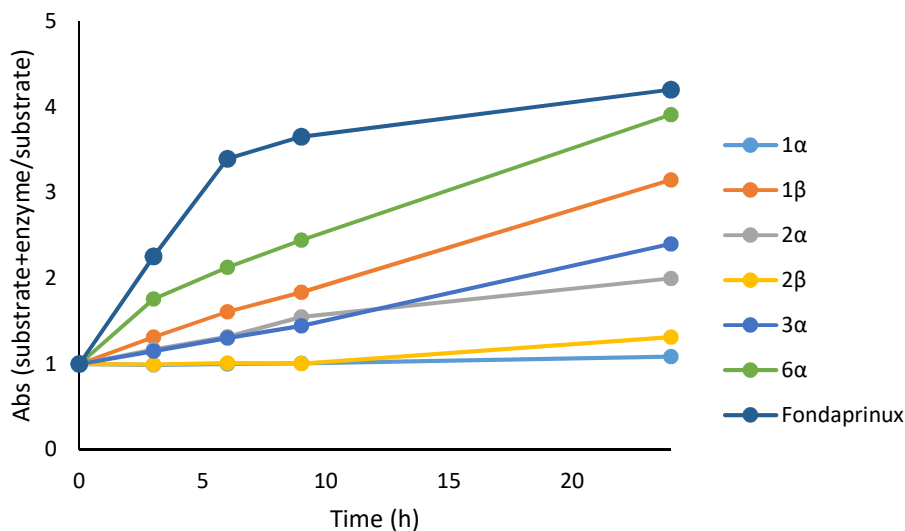

**Figure S2.** Hydrolytic potential of **1α**, **1β**, **2α**, **2β**, **3α** or **6α** with heparanase over time compared to fondaprinux.

## 5. Two-Stage Chromogenic Assay to Evaluate Anticoagulant Activity<sup>2</sup>

BIOPHEN Heparin AntiXa (2 stages) USP/EP (Cat #: A221005-USP) kits from Aniara and BIOPHEN Heparin Anti-IIa (2 stages) USP/EP (Cat #: A220005-USP) were utilized to assess FXa and FIIa activity, respectively.

### Factor Xa activity:

All the reagents were reconstituted and prepared according to the manufacturer's instructions and incubated at 37 °C for 15 min. Different concentrations of heparin (0.002-500 nM; 40 μL) or trisaccharide **1α** (3.9-4000 nM; 40 μL) and ATIII (0.04 IU; 40 μL) were added to a deep-well block (Nunc 96 DeepWell 1.0 mL/well, clear), mixed, and incubated at 37 °C for 2 min. To the reaction mixture, FXa (0.32 μg; 40 μL) was added by multichannel pipette and was incubated at 37 °C for another 2 min (stage 1), then FXa specific chromogenic substrate (0.048 mmol; 40 μL) was added. The reaction was stopped by adding citric acid (240 μL; 20 g/L) exactly after 2 min. A 100 μL solution was then transferred to a clear 96-well microplate in triplicate, and absorbance at 405 nm was measured with a SpectraMax iD5 Microplate Reader (Molecular Devices). The sample blank was measured by mixing the reagents in reverse order from that of the test, i.e. citric



acid, FXa substrate, FXa, ATIII, and sample. The sample blank value was deducted from the absorbance measured for the corresponding assay.

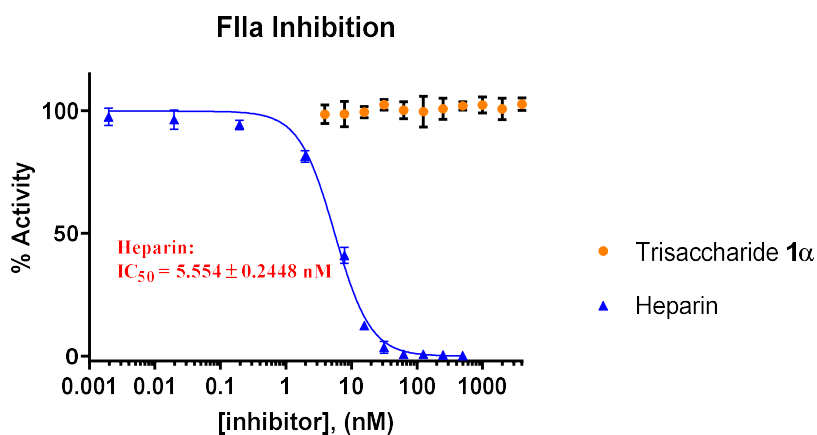

**Figure S3.** Inhibition of FXa by trisaccharide **1α** in comparison to heparin.

### Factor IIa activity

All the reagents were reconstituted and prepared according to the manufacturer's instructions and incubated at 37 °C for 15 min. Different concentrations of heparin (0.002-500 nM; 40 μL) or trisaccharide **1α** (3.9-4000 nM; 40 μL) and ATIII (0.01 IU; 40 μL) were added to a deep-well block (Nunc 96 DeepWell 1.0 mL/well, clear), mixed, and incubated at 37 °C for 2 min. To the reaction mixture, FIIa (1.2 nkat; 40 μL) was added by multichannel pipette and was incubated at 37 °C for another 2 min (stage 1), then FIIa specific chromogenic substrate (0.048 mmol; 40 μL) was added. The reaction was stopped by adding citric acid (240 μL; 20 g/L) exactly after 2min. 100 μL was transferred to a 96-well microplate in triplicate, and absorbance at 405 nm was measured with SpectraMax iD5 Microplate Reader (Molecular Devices). The sample blank was measured by mixing the reagents in reverse order from that of the test, i.e. citric acid, FXa substrate, FXa, ATIII, and sample. The sample blank value was deducted from the absorbance measured for the corresponding assay.

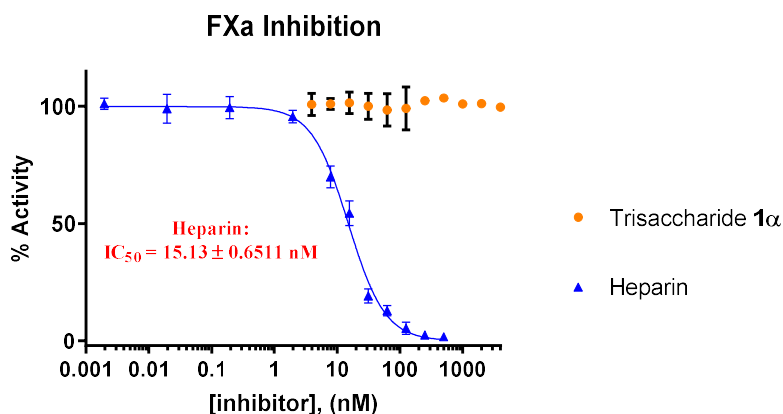

**Figure S4.** Inhibition of FIIa by trisaccharide **1α** in comparison to heparin.

## 6. Platelet Factor 4 Binding Test by Biolayer Interferometry (BLI) Assay<sup>1</sup>

BLI assays were performed on an Octet Red Instrument (fortéBIO) at 25 °C. Immobilization and binding analysis were carried out at 1000 rpm using HBS-EP buffer [10 mM HEPES, pH 7.4, 150 mM NaCl, 3.0 mM EDTA, and 0.005% (v/v) surfactant tween20]. A solution affinity assay, used to determine affinities of ligands by SPR analysis was adopted to BLI.<sup>3</sup> In this method PF 4 (100 nM; 100 μL) was mixed with various concentrations of trisaccharide **1α** (0.08-250 μM; 100 μL) or heparin (0.4-400 nM; 100 μL). Free protein in this equilibrium mixture is tested for binding against immobilized heparin (all proteins are carrier-free and purchased from R&D Systems). Heparin-biotin (Creative PEGworks, 18 kDa, 1 biotin per HP polymer), 5 μg /mL was immobilized on to streptavidin biosensors (fortéBio) for 5 min. Binding experiments were carried under conditions of mass transport. Binding was fitted to equation 1 of ref 10 using Graphpad Prism. BLI response was used in place of F and ligand (heparin / trisaccharide **1α**) concentration was used in place of [metal].

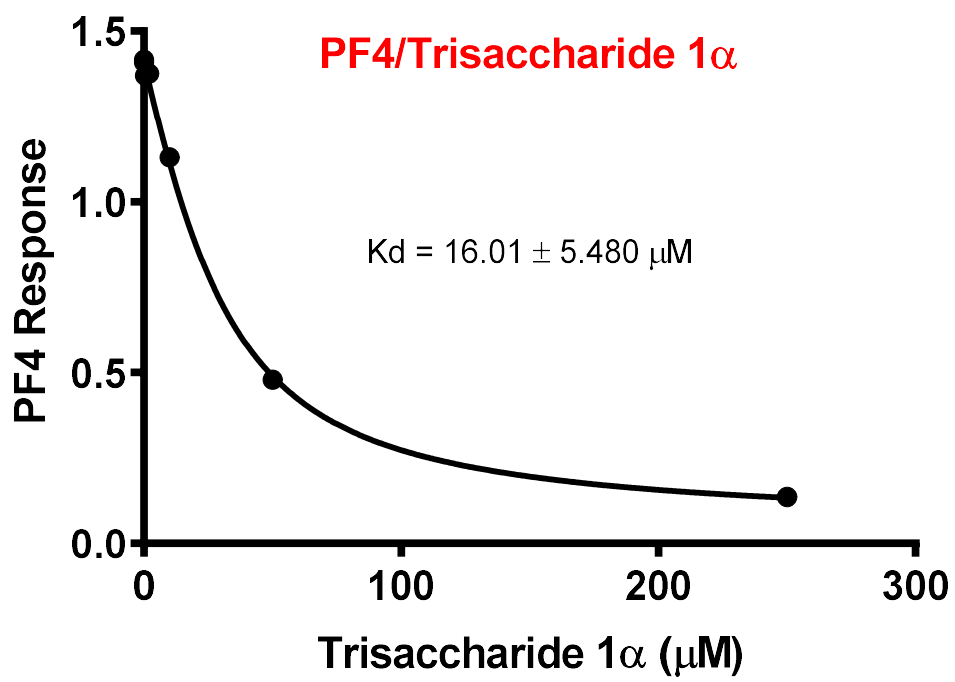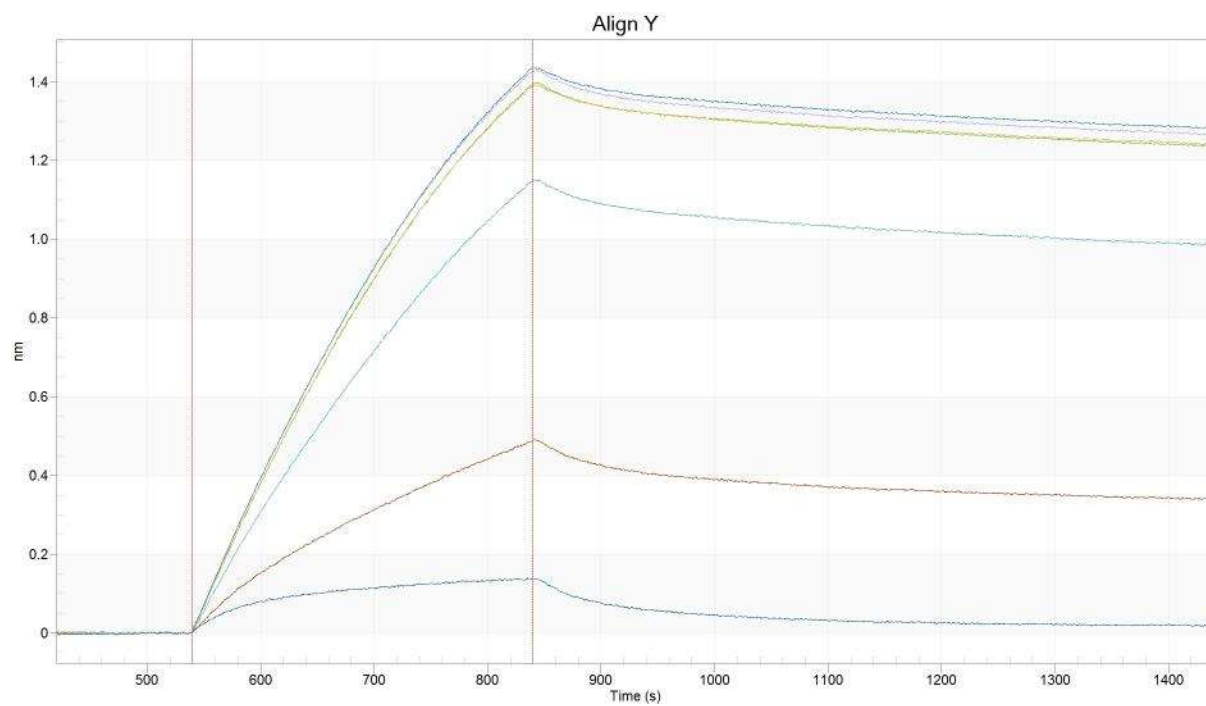

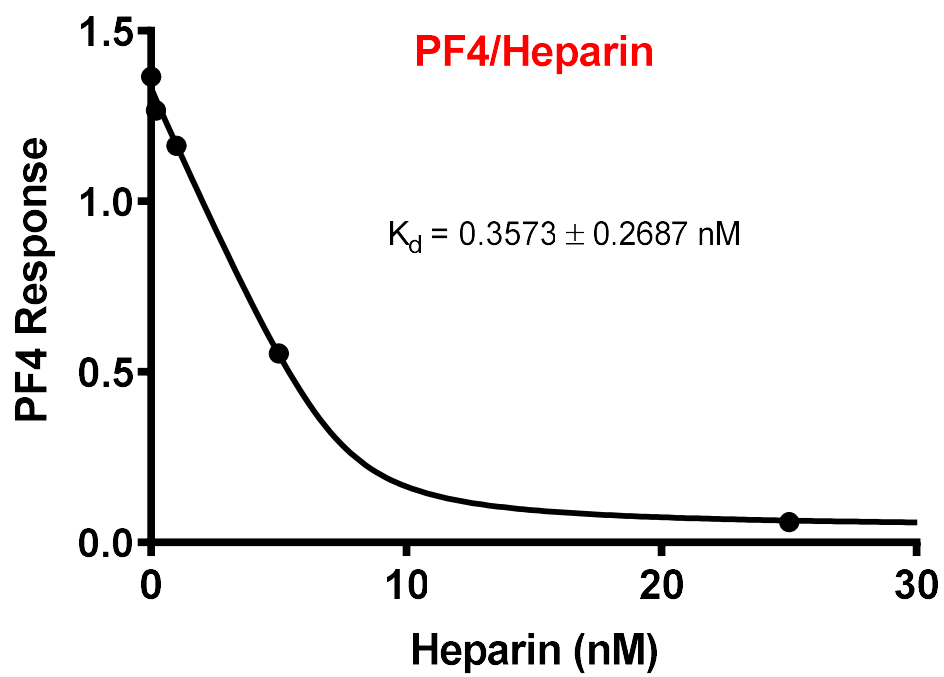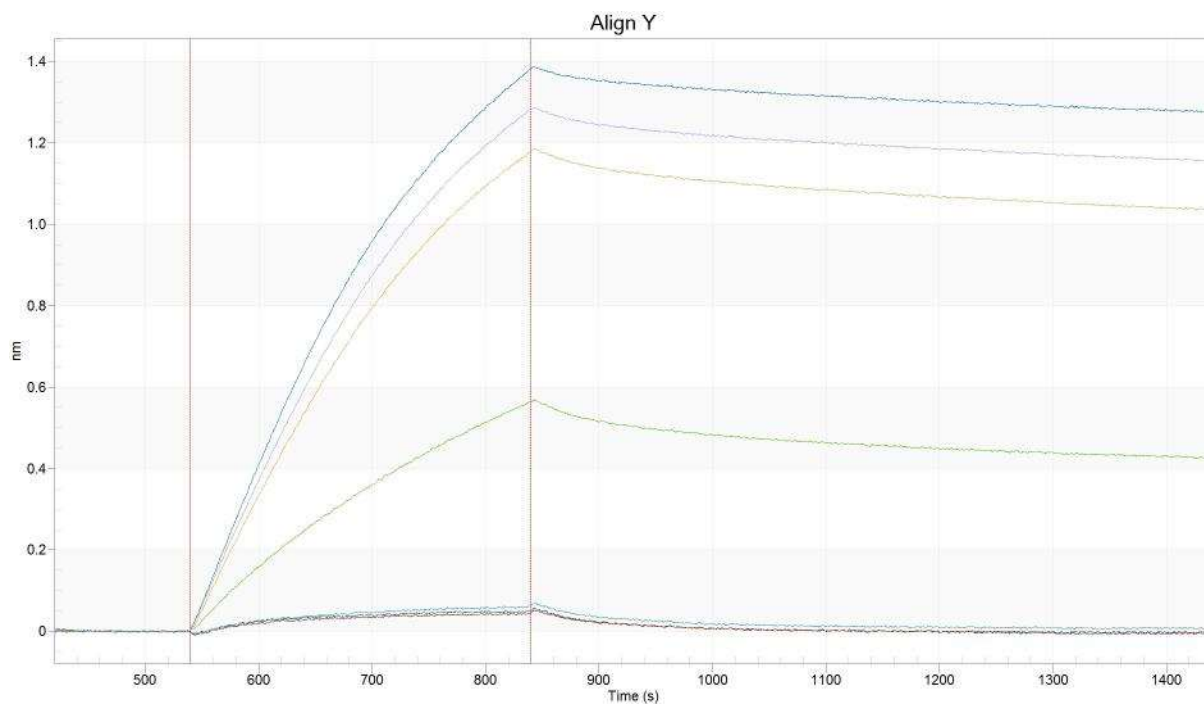

**Figure S5.** BLI assay to test binding affinity of PF4 and trisaccharide **1a** / heparin.

## 7. Inhibition of ECM Degradation Assay

Briefly, sulfate [<sup>35</sup>S] labeled ECM coating the surface of 35 mm tissue culture dishes,<sup>12</sup> is incubated (5 h, 37°C, pH 6.0, 1 ml final volume) with recombinant human heparanase (0.5 ng/ml) in the absence and presence of trisaccharide **1α**. The reaction mixture contains: 50 mM NaCl, 1 mM DTT, 1 mM CaCl<sub>2</sub>, and 10 mM buffer Phosphate-Citrate, pH 6.0. To evaluate the occurrence of proteoglycan degradation, the incubation medium is collected and applied for gel filtration on Sepharose 6B columns (0.9 x 30 cm). Fractions (0.2 ml) are eluted with PBS and counted for radioactivity. The excluded volume (V<sub>0</sub>) is marked by blue dextran and the total included volume (V<sub>t</sub>) by phenol red. Degradation fragments of HS side chains, characterized as described,<sup>13</sup> are eluted from Sepharose 6B at 0.5 < Kav < 0.8 (fractions 20-35). Results are best represented by the actual gel filtration pattern.<sup>14-16</sup> Each experiment was performed at least three times and the variation of elution positions (Kav values) did not exceed ±15%.

## 8. Inhibition of Heparanase in Pancreatic β Cells

***Culture of mouse pancreatic β cell line MIN6 and detection of cellular mitochondrial ROS using mitochondrial ROS trackers.*** Mouse pancreatic β cell line (insulinoma) MIN6 was cultured as we previously described.<sup>17</sup> Specifically, MIN6 cells were cultured with high-glucose DMEM supplemented with 10% fetal bovine serum (FBS), 50μM β-mercaptoethanol, and antibiotics. Before experiments, MIN6 cells were seeded in 4-well slide-chambers for immunofluorescence analyses. When the cells reached approximately 50% confluency, they were cultured in the conditioned medium from heparanase-producing CHO cells or control CHO cells. Heparanase-producing CHO cells were provided by Dr. Israel Vlodaysky (Technion, Israel). Meanwhile, the cells were treated with vehicle (PBS) or the trisaccharide **1α** inhibitor for 24 h. The cells were then stained with mitochondrial ROS tracker probe using the concentration of 100 nM according to the manufacturer's instruction (Molecular Probes, Invitrogen). Mitochondrial ROS in the MIN6 cells were visualized by fluorescence microscopy, and the extents and intensities of fluorescent activities, which reflect intracellular mitochondrial ROS, were quantified using ImageJ software.

***Quantitative real-time PCR (qPCR)*** - Total RNA from Min-6 cells was extracted using Trizol by following manufacture's instruction and complementary DNA was synthesized from 500 ng of total RNA to with High Capacity cDNA Reverse Transcription Kit (AB applied biosystems). The

abundance of mRNA was measured by q PCR analysis using the SYBR Green PCR Master mix (Applied Biosystems).

The sequences of the primers for SOD1: 5'-GCGGTGAACCAGTTGTGTTGTC-3' and 5'-CAGTCACATTGCCAGGTCTCC-3'; and for ERO1 $\alpha$ : 5'-ATGGACTIONGTGTTGGCTGCTT-3' and 5'-GCTTTCCGGCATATTTGCGA-3'.

## 9. Computational study

All molecular docking and MD simulations were conducted with the YASARA Structure software package ([www.yasara.org](http://www.yasara.org)). Detail procedures for the computation study were reported in previous article.<sup>5</sup>

### 9.1. Computational Docking

In the docking study, the enzyme structure was inherited from previously modified *apo* heparanase structure (PDB code: 5E8M).<sup>5,6</sup> The ligand saccharide backbone was obtained from Glycam GAGs builders ([www.glycam.com](http://www.glycam.com)), then the sulfation patterns and aliphatic portion was modified on GaussView 5.0.<sup>7</sup> The modified ligand pdb files were then subjected to energy minimization in YASARA, and saved in .job format. Each ligand was docked separately into heparanase within the simulation cell (80 x 61 x 76 Å) using Autodock VINA<sup>8</sup> default parameters. The ligand and enzyme were subjected to 100 docking runs, where AMBER14 force field<sup>9</sup> was applied to the protein, and GLYCAM06<sup>10</sup> and GAFF/Am1BCC force field was applied to each ligand. During docking study, the ligands and receptor binding pocket residues were kept flexible. The most populated clusters of the docking runs was subjected to MD simulation.

## 9.2. Docking Results for HS Trisaccharides

**Figure S6:** Snapshots of the first cluster when ligands docked into human heparanase and the distance between the catalytic residues and the scissile bond

| Clu | Members | Bind.energy spread [kcal/mol] | Dissoc. constant [pM] |
|-----|---------|-------------------------------|-----------------------|
| 001 | 016     | 000009.5228+-000000.5844      | 00000000104647.2293   |
| 002 | 002     | 000009.0810+-000000.0220      | 00000000220586.4078   |
| 003 | 002     | 000008.8185+-000000.0695      | 00000000343552.2965   |

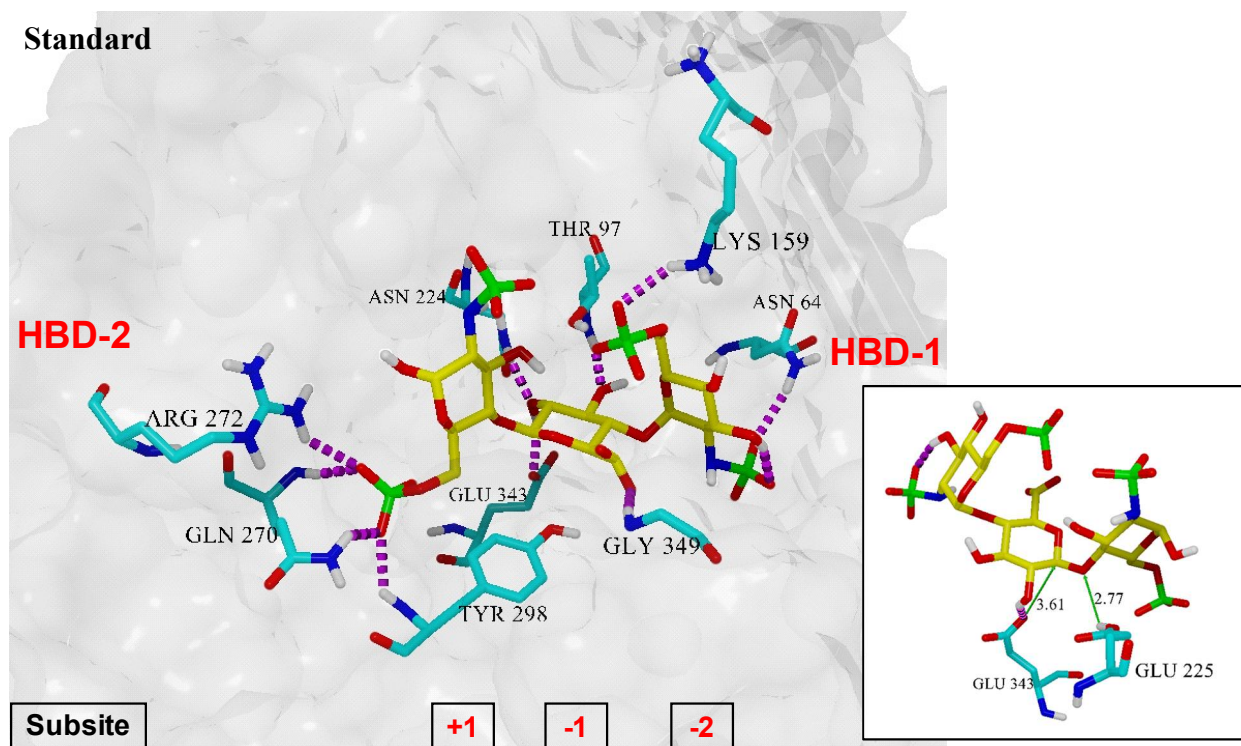

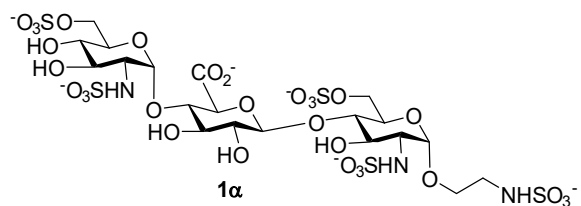

| Clu | Members | Bind.energy spread [kcal/mol] | Dissoc. constant [pM] |
|-----|---------|-------------------------------|-----------------------|
| 001 | 010     | 000010.1993+-000000.7108      | 00000000033408.6388   |
| 002 | 003     | 000009.0003+-000000.2895      | 00000000252759.5868   |
| 003 | 001     | 000009.3710+-000000.0000      | 00000000135209.3990   |
| 004 | 004     | 000008.6332+-000000.3046      | 00000000469658.2439   |
| 005 | 001     | 000008.4040+-000000.0000      | 00000000691549.1274   |
| 006 | 001     | 000007.6410+-000000.0000      | 00000002506723.6529   |

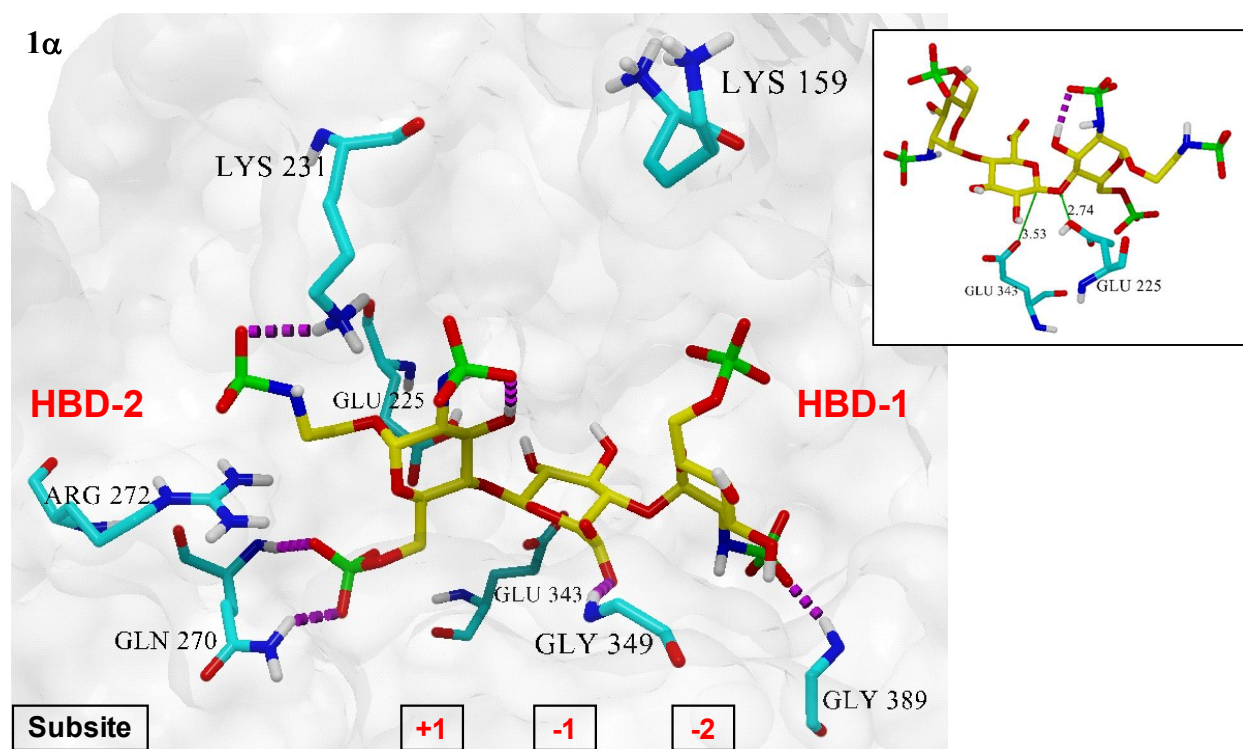



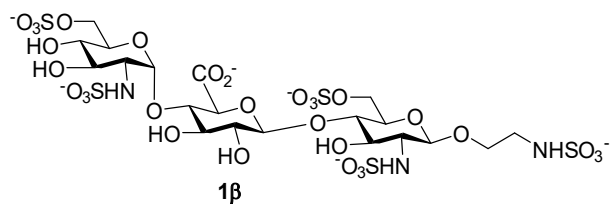

| Clu | Members | Bind.energy spread [kcal/mol] | Dissoc. constant [pM] |
|-----|---------|-------------------------------|-----------------------|
| 001 | 010     | 000009.2158+-000001.1214      | 00000000175699.1364   |
| 002 | 001     | 000008.5790+-000000.0000      | 00000000514691.4643   |
| 003 | 001     | 000007.9040+-000000.0000      | 00000001608148.1296   |
| 004 | 002     | 000007.4785+-000000.2465      | 00000003297765.3798   |
| 005 | 004     | 000007.3618+-000000.1473      | 00000004016040.0966   |
| 006 | 001     | 000007.3470+-000000.0000      | 00000004117274.1365   |
| 007 | 001     | 000007.1290+-000000.0000      | 00000005948464.8219   |

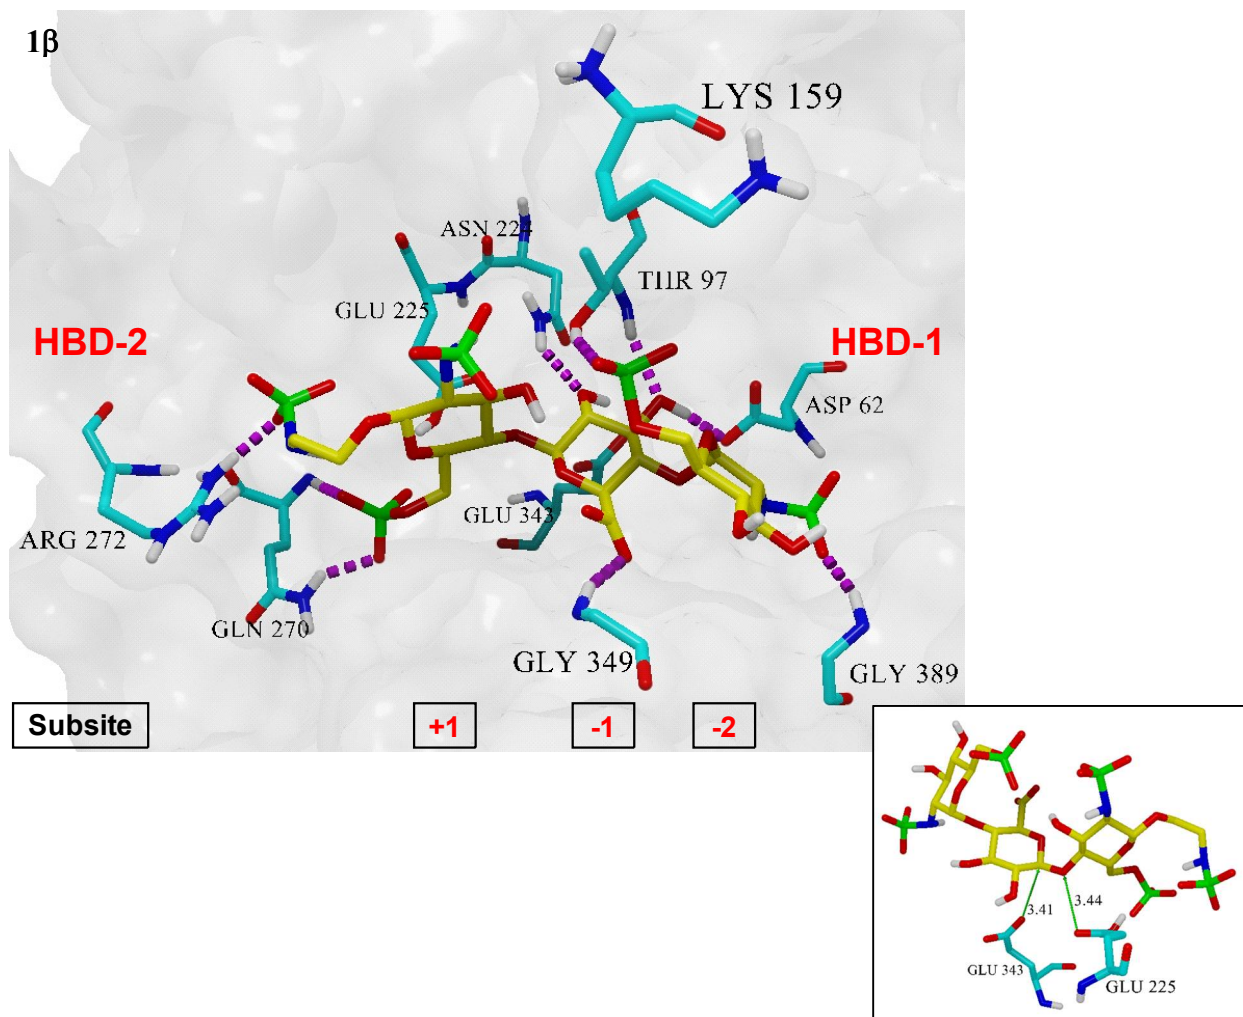

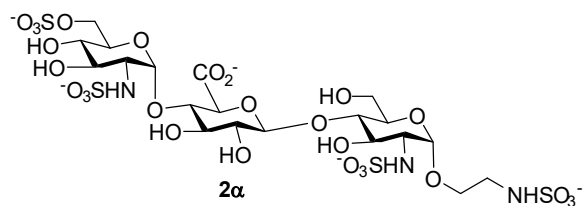

| Clu | Members | Bind.energy spread [kcal/mol] | Dissoc. constant [pM] |
|-----|---------|-------------------------------|-----------------------|
| 001 | 007     | 000008.3014+-000000.7134      | 00000000822258.8077   |
| 002 | 006     | 000008.9397+-000000.2119      | 00000000280012.0893   |
| 003 | 001     | 000007.9780+-000000.0000      | 00000001419330.0346   |
| 004 | 002     | 000007.7145+-000000.1695      | 00000002214269.3720   |
| 005 | 002     | 000007.2910+-000000.5280      | 00000004525413.3424   |
| 006 | 001     | 000007.6090+-000000.0000      | 00000002645832.3817   |
| 007 | 001     | 000006.7540+-000000.0000      | 00000011201647.3126   |

**2α: Clu 001**

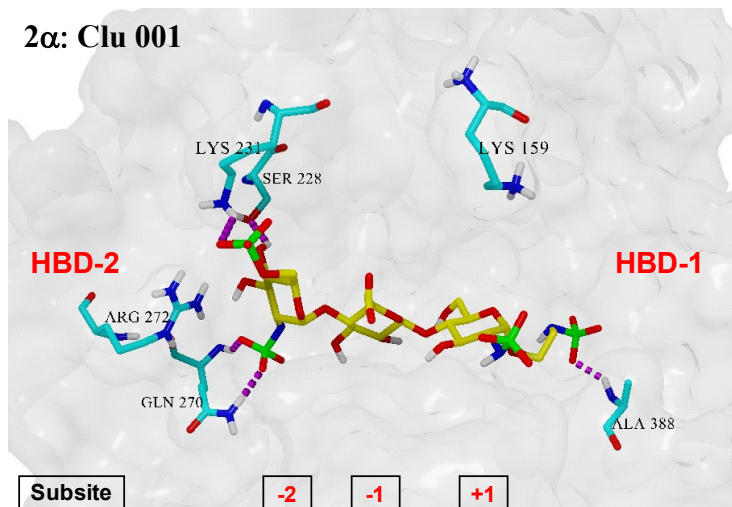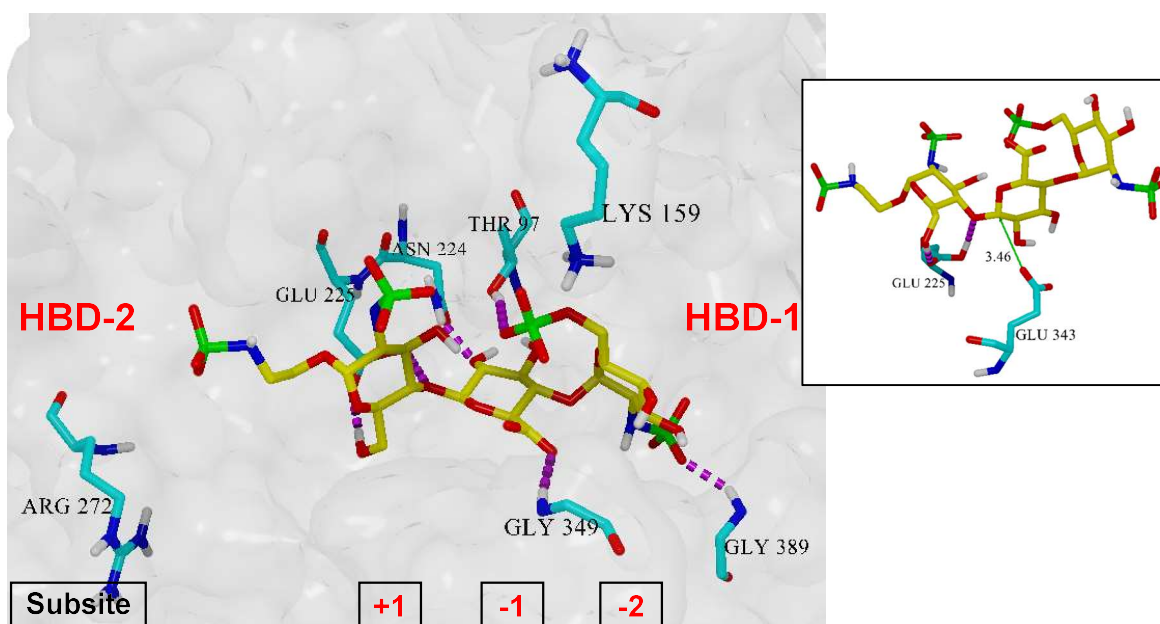

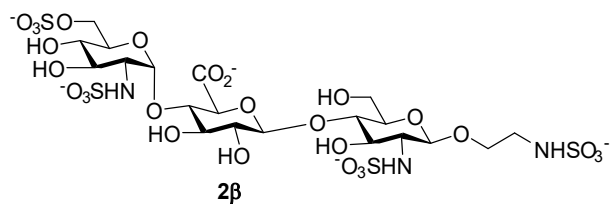

| Clu | Members | Bind.energy spread [kcal/mol] | Dissoc. constant [pM] |
|-----|---------|-------------------------------|-----------------------|
| 001 | 003     | 000008.9960+-000000.2861      | 00000000254615.0745   |
| 002 | 001     | 000009.2060+-000000.0000      | 00000000178629.3151   |
| 003 | 002     | 000008.4735+-000000.6395      | 00000000615006.0169   |
| 004 | 004     | 000007.4480+-000000.4922      | 00000003471971.8437   |
| 005 | 001     | 000007.8580+-000000.0000      | 00000001737978.0922   |
| 006 | 001     | 000006.8340+-000000.0000      | 00000009786818.2811   |
| 007 | 001     | 000006.7600+-000000.0000      | 00000011088781.6526   |
| 008 | 002     | 000006.6335+-000000.1095      | 00000013728057.8518   |
| 009 | 001     | 000006.6810+-000000.0000      | 00000012670426.9642   |
| 010 | 001     | 000006.6700+-000000.0000      | 00000012907865.2525   |
| 011 | 001     | 000006.6240+-000000.0000      | 00000013949950.6377   |
| 012 | 002     | 000006.4580+-000000.0050      | 00000018460848.0877   |

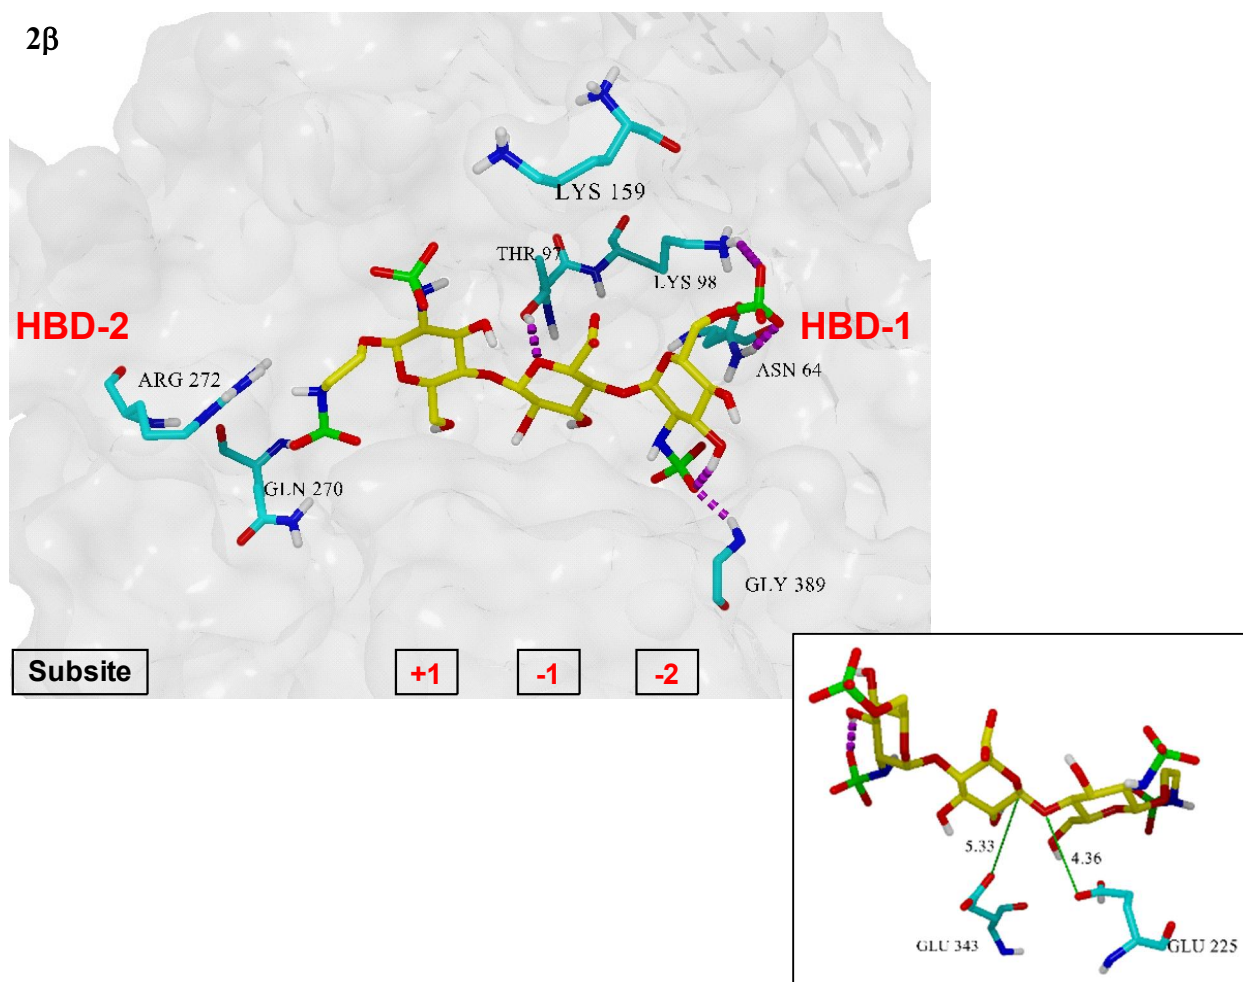

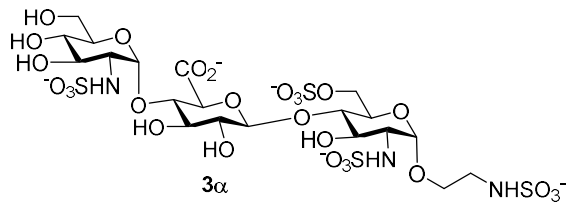

| Clu | Members | Bind.energy spread [kcal/mol] | Dissoc. constant [pM] |
|-----|---------|-------------------------------|-----------------------|
| 001 | 004     | 000008.0042+-000000.4151      | 00000001357819.9161   |
| 002 | 006     | 000007.1860+-000000.2470      | 00000005402859.9435   |
| 003 | 001     | 000007.5370+-000000.0000      | 00000002987711.9929   |
| 004 | 003     | 000007.0517+-000000.2647      | 00000006777830.8857   |
| 005 | 001     | 000007.0270+-000000.0000      | 00000007065967.1517   |
| 006 | 001     | 000006.9620+-000000.0000      | 00000007885277.8732   |
| 007 | 001     | 000006.8680+-000000.0000      | 00000009241009.1910   |
| 008 | 001     | 000006.8120+-000000.0000      | 00000010157056.5632   |
| 009 | 001     | 000006.7580+-000000.0000      | 00000011126282.5828   |
| 010 | 001     | 000006.7230+-000000.0000      | 00000011803346.6062   |

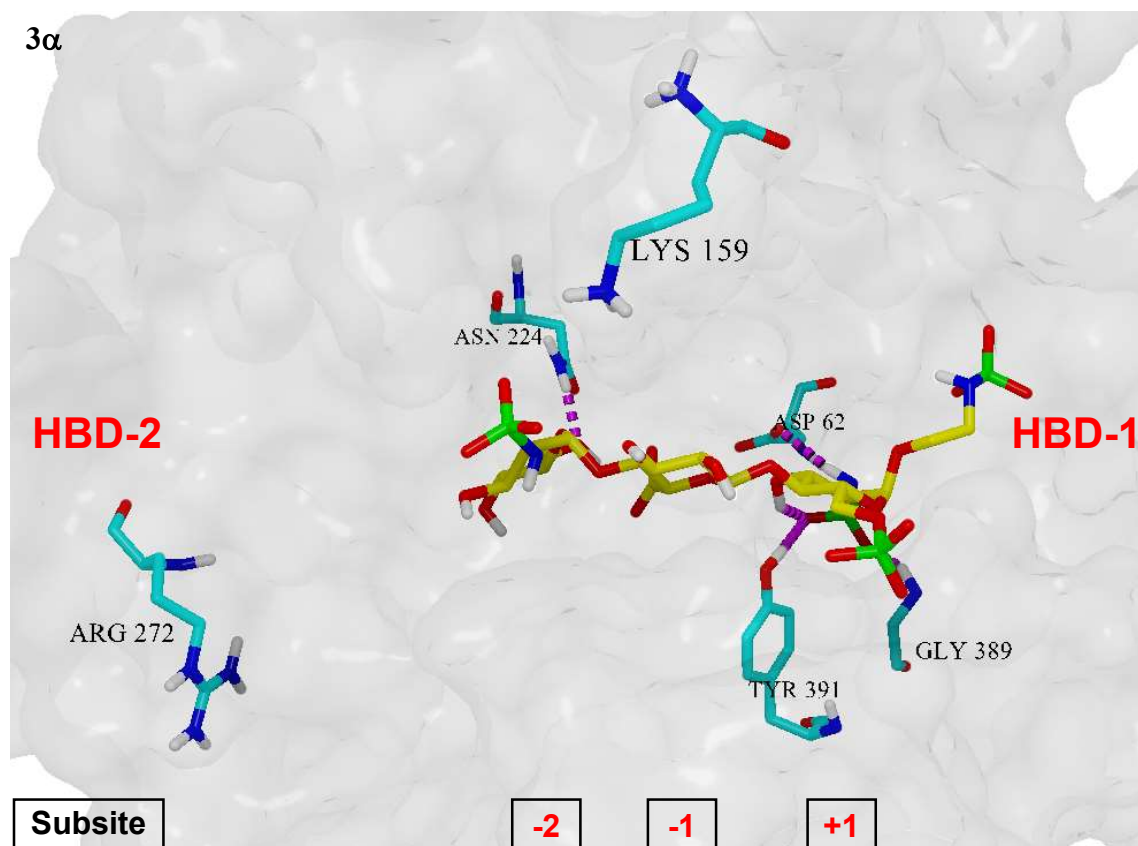

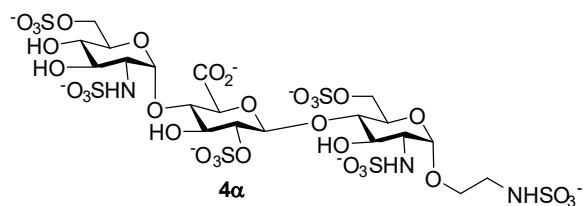

| Clu | Members | Bind.energy spread [kcal/mol] | Dissoc. constant [pM] |
|-----|---------|-------------------------------|-----------------------|
| 001 | 008     | 000009.8015+-000000.4618      | 00000000065380.5138   |
| 002 | 004     | 000009.3918+-000000.4370      | 00000000130556.0984   |
| 003 | 001     | 000009.4400+-000000.0000      | 00000000120345.5497   |
| 004 | 003     | 000008.3830+-000000.5373      | 000000000716500.3913  |
| 005 | 001     | 000007.6750+-000000.0000      | 000000002366922.2220  |
| 006 | 001     | 000007.5600+-000000.0000      | 000000002873953.7925  |
| 007 | 001     | 000007.5340+-000000.0000      | 000000003002879.7170  |
| 008 | 001     | 000007.5130+-000000.0000      | 000000003111221.8575  |

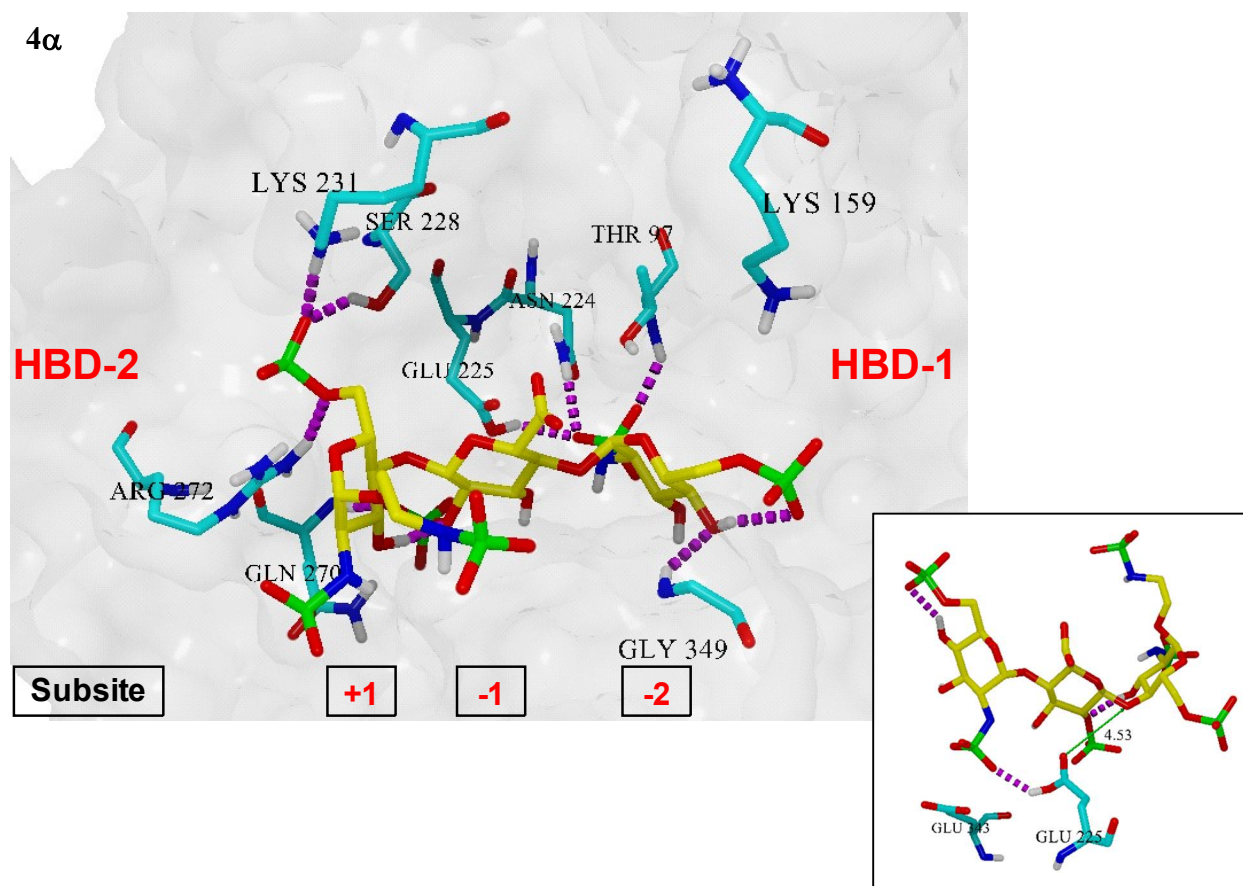

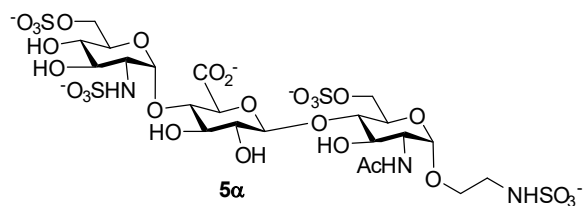

| Clu | Members | Bind.energy spread [kcal/mol] | Dissoc. constant [pM] |
|-----|---------|-------------------------------|-----------------------|
| 001 | 006     | 000009.9750+-000000.3556      | 00000000048783.3737   |
| 002 | 003     | 000008.9677+-000000.1176      | 00000000267086.7681   |
| 003 | 003     | 000008.4820+-000000.4666      | 00000000606246.0493   |
| 004 | 005     | 000008.0832+-000000.2766      | 00000001188423.8783   |
| 005 | 001     | 000008.1730+-000000.0000      | 00000001021285.6477   |
| 006 | 002     | 000007.8135+-000000.0845      | 00000001873539.8824   |

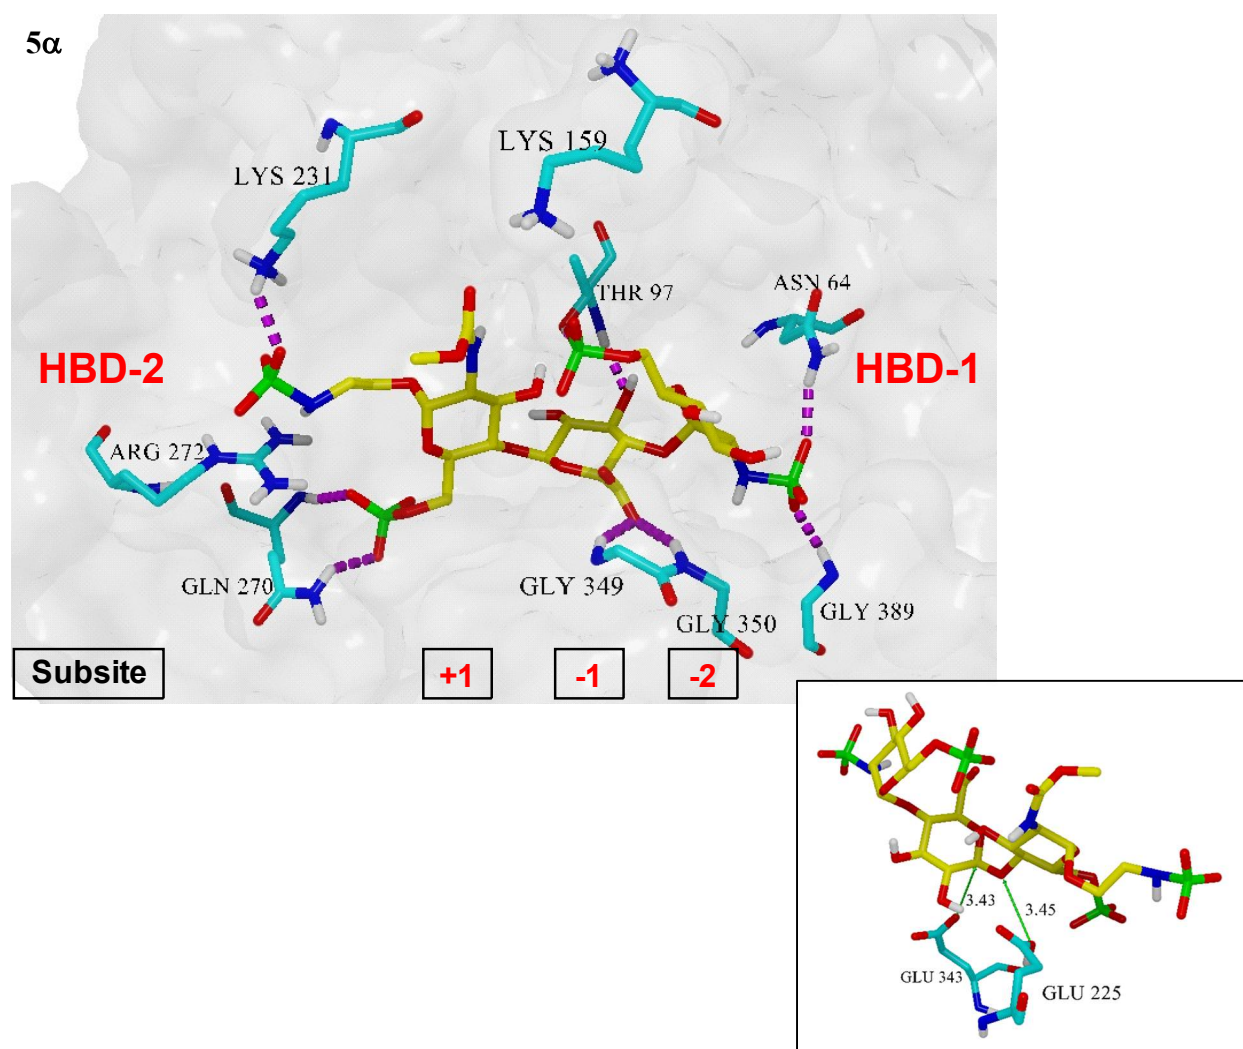

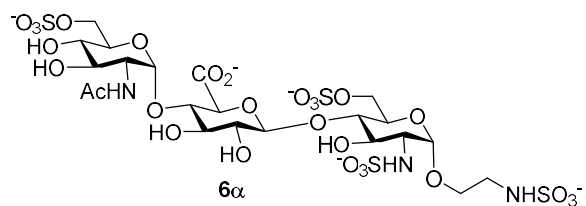

| Clu | Members | Bind.energy spread [kcal/mol] | Dissoc. constant [pM] |
|-----|---------|-------------------------------|-----------------------|
| 001 | 001     | 000008.9160+-000000.0000      | 00000000291423.2851   |
| 002 | 001     | 000008.5070+-000000.0000      | 00000000581197.4745   |
| 003 | 001     | 000008.4690+-000000.0000      | 00000000619695.0101   |
| 004 | 001     | 000008.3330+-000000.0000      | 00000000779590.4108   |
| 005 | 001     | 000008.2310+-000000.0000      | 00000000926047.3751   |
| 006 | 001     | 000008.2140+-000000.0000      | 00000000953003.3801   |
| 007 | 001     | 000008.0510+-000000.0000      | 00000001254799.6455   |
| 008 | 003     | 000007.6833+-000000.1532      | 00000002333864.8466   |
| 009 | 003     | 000007.2710+-000000.1149      | 00000004680781.2506   |
| 010 | 004     | 000006.9325+-000000.1604      | 00000008287826.7693   |
| 011 | 001     | 000006.8150+-000000.0000      | 00000010105752.6661   |
| 012 | 001     | 000006.7300+-000000.0000      | 00000011664715.3546   |
| 013 | 001     | 000006.6450+-000000.0000      | 00000013464171.2299   |

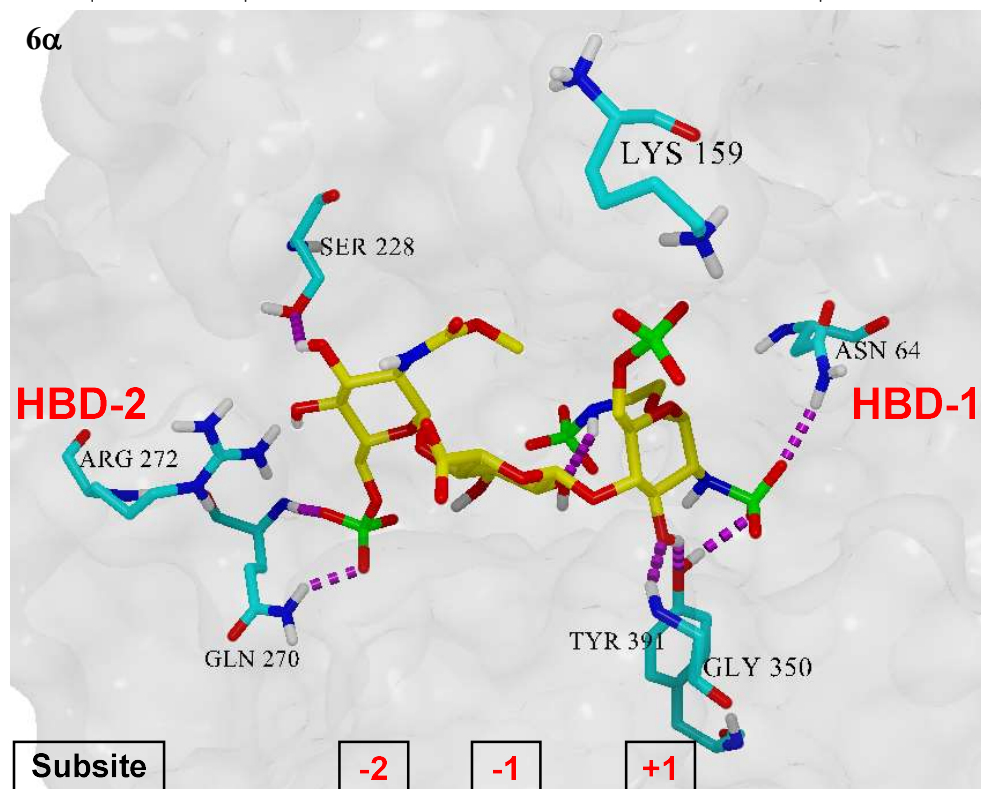

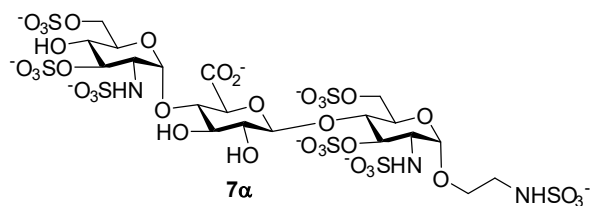

| Clu | Members | Bind.energy spread [kcal/mol] | Dissoc. constant [pM] |
|-----|---------|-------------------------------|-----------------------|
| 001 | 002     | 000010.4000+-000000.1360      | 00000000023809.1858   |
| 002 | 004     | 000008.4980+-000000.6459      | 00000000590093.4751   |
| 003 | 002     | 000008.5505+-000000.1175      | 00000000540055.0431   |
| 004 | 002     | 000007.8640+-000000.0630      | 00000001720465.8644   |
| 005 | 002     | 000007.6770+-000000.0990      | 00000002358946.4528   |
| 006 | 004     | 000007.2752+-000000.1354      | 00000004647324.9099   |
| 007 | 001     | 000007.3750+-000000.0000      | 00000003927224.4646   |
| 008 | 001     | 000007.3030+-000000.0000      | 00000004434678.3692   |
| 009 | 001     | 000007.2370+-000000.0000      | 00000004957245.9638   |
| 010 | 001     | 000007.1370+-000000.0000      | 00000005868686.7699   |

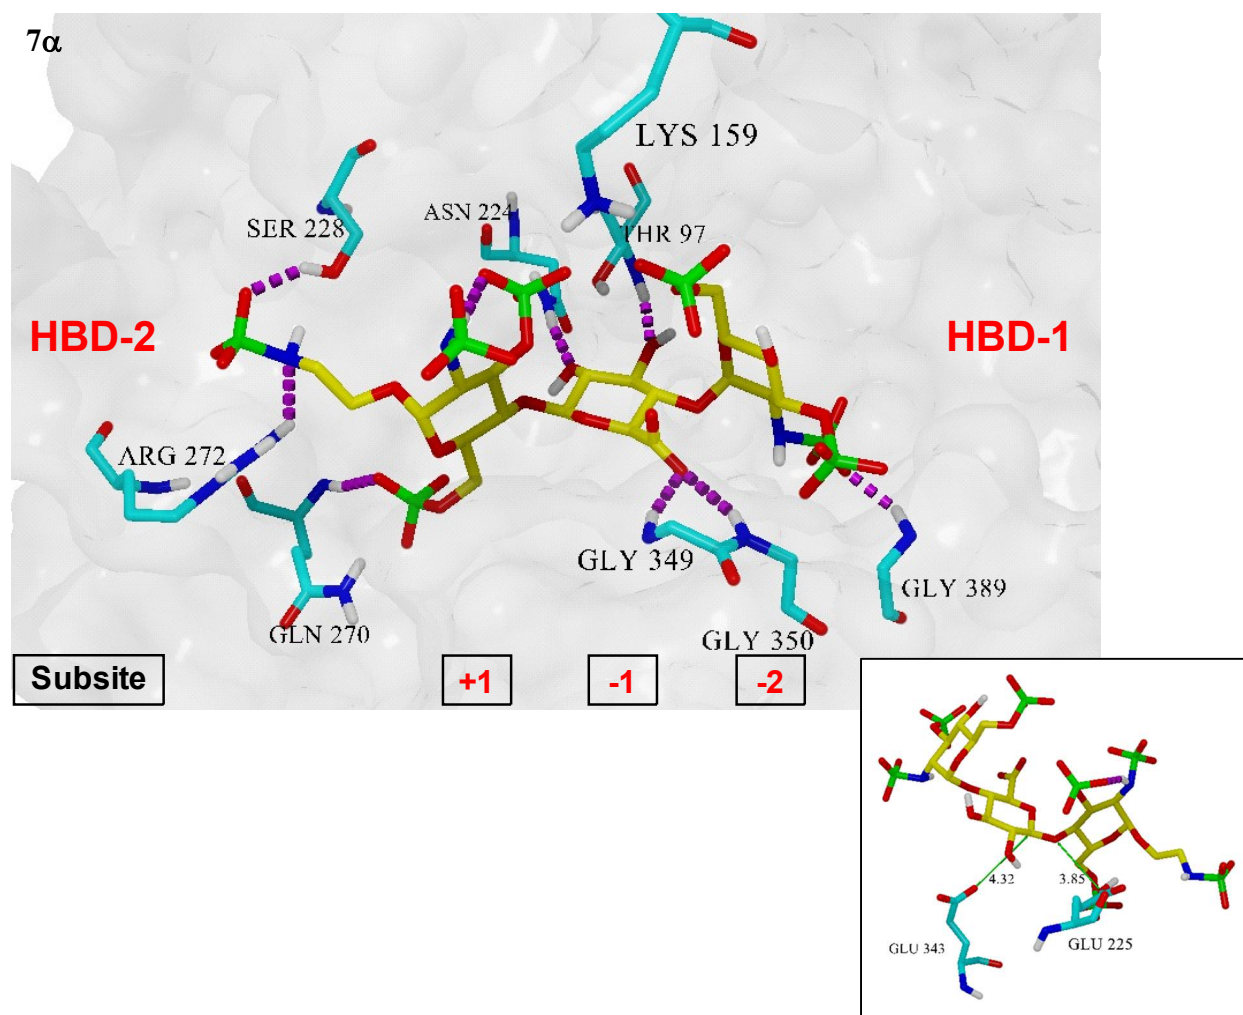



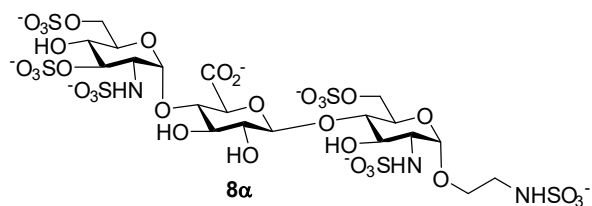

| Clu | Members | Bind.energy spread [kcal/mol] | Dissoc. constant [pM] |
|-----|---------|-------------------------------|-----------------------|
| 001 | 007     | 000010.2929+-000000.6847      | 00000000028528.6276   |
| 002 | 003     | 000009.9593+-000000.2828      | 00000000050090.5229   |
| 003 | 004     | 000009.7858+-000000.1594      | 00000000067141.8071   |
| 004 | 001     | 000009.7630+-000000.0000      | 00000000069770.1005   |
| 005 | 004     | 000009.5748+-000000.1096      | 00000000095864.3483   |
| 006 | 001     | 000009.5040+-000000.0000      | 00000000108023.3395   |

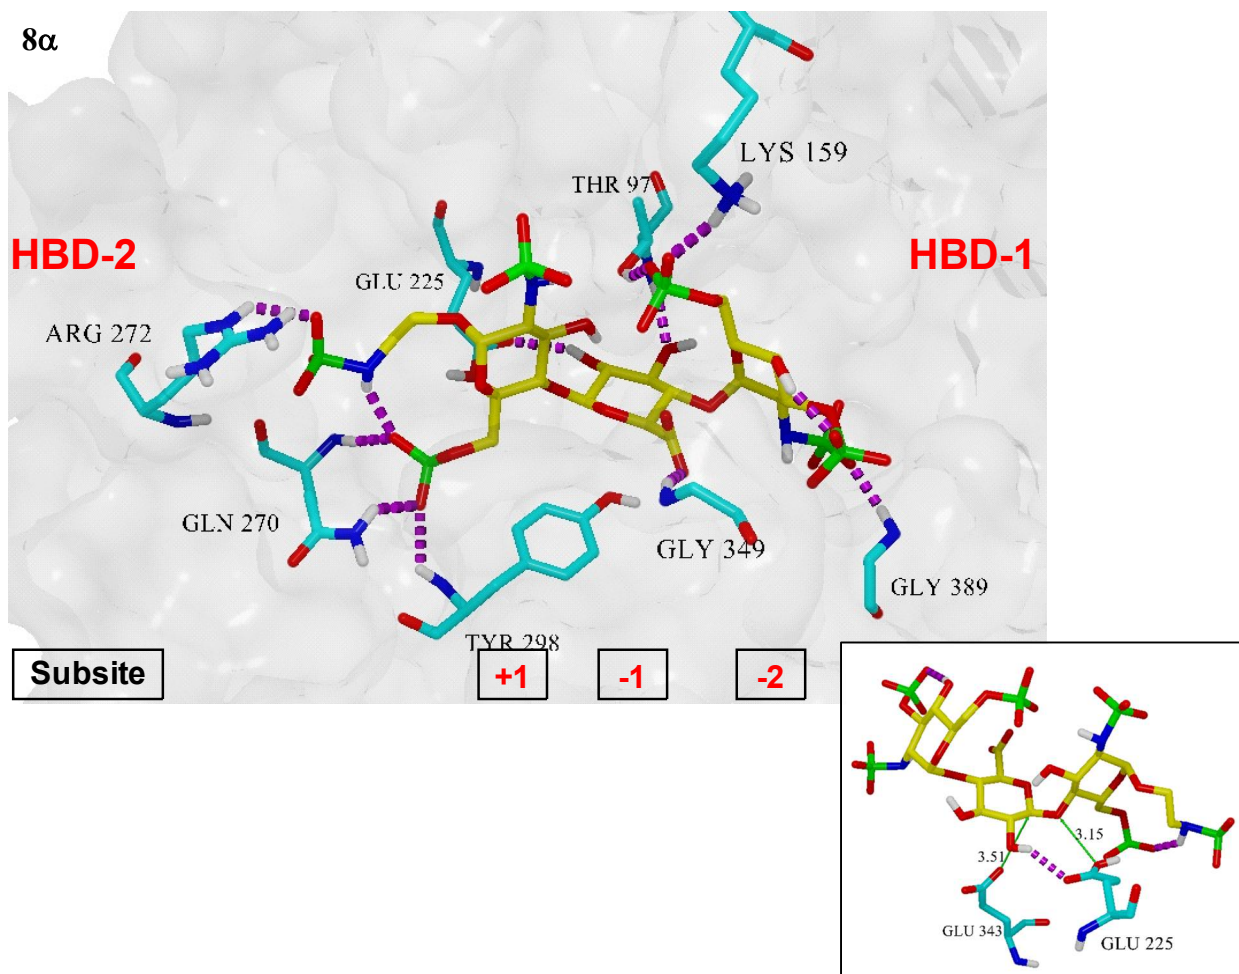

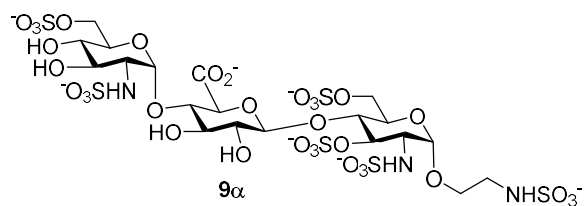

| Clu | Members | Bind.energy spread [kcal/mol] | Dissoc. constant [pM] |
|-----|---------|-------------------------------|-----------------------|
| 001 | 001     | 000010.2700+-000000.0000      | 00000000029650.7014   |
| 002 | 001     | 000009.2050+-000000.0000      | 00000000178931.1836   |
| 003 | 001     | 000008.6190+-000000.0000      | 00000000481090.4998   |
| 004 | 001     | 000008.1180+-000000.0000      | 00000001120631.2920   |
| 005 | 001     | 000007.9030+-000000.0000      | 00000001610864.4683   |
| 006 | 002     | 000007.6850+-000000.0140      | 00000002327309.3568   |
| 007 | 002     | 000007.4250+-000000.0720      | 00000003609402.5303   |
| 008 | 003     | 000007.3183+-000000.0573      | 00000004321382.5274   |
| 009 | 002     | 000007.2120+-000000.0790      | 00000005170894.4260   |
| 010 | 001     | 000007.2650+-000000.0000      | 00000004728423.9477   |
| 011 | 001     | 000007.2530+-000000.0000      | 00000004825169.0517   |
| 012 | 002     | 000007.1125+-000000.1095      | 00000006116453.2049   |
| 013 | 001     | 000007.1910+-000000.0000      | 00000005357457.2666   |
| 014 | 001     | 000007.0480+-000000.0000      | 00000006819908.8375   |

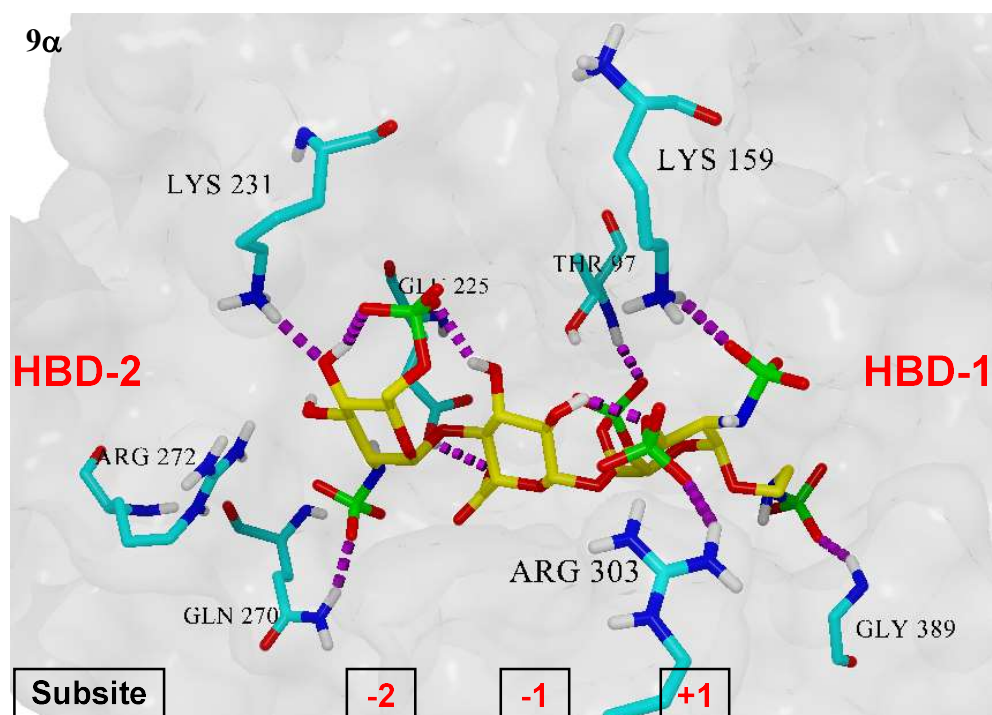

### 9.3. Molecular Dynamic Simulations

The most populated clusters (heparanase-ligand complexes) from the each docking run were subjected to MD simulation. Each enzyme-ligand complex was imported into YASARA and energy minimized in *vacuo*. Meanwhile, a simulation cell was formulated with at least 10 Å from all three sides of the enzyme-ligand complex (86 x 61x 59 Å for **1α** complex and 67 x 89 x 61 Å for **1β** complex). AMBER14 force field was applied with periodic boundary conditions. The force field parameters were assigned using YASARA's "AutoSMILES" feature. The simulations were run in a default physiological solution (pH 7.4, 0.9% m/v NaCl solution with TIP3P water,<sup>11</sup> water density set at 0.997 g/mL) at 298 K. The pK<sub>a</sub> of titratable side chains was predicted and assigned to respective groups before running MD and Glu 225 was manually protonated.

MD simulations were performed for 25000 ps for both **1α** and **1β** complexes initially. As suspicious movements were found in **1α** complex at the end of the simulation, an extra 5000 ps were added to the duration for **1α** complex. The cutoff radius for long-range electrostatics was set to 8 Å. The snapshots were saved every 25 ps for the whole simulation duration, which were then analyzed for the RMSD of the C $\alpha$  and heavy atoms of ligand-protein complex, as well as the distance between the side chain carboxylic carbons of catalytic residues and the scissile bond (Glu225-O1, Glu343-C1).

**Figure S7.** RMSD of the C $\alpha$  and heavy atoms of (A) **1 $\alpha$**  and (B) **1 $\beta$**  complex

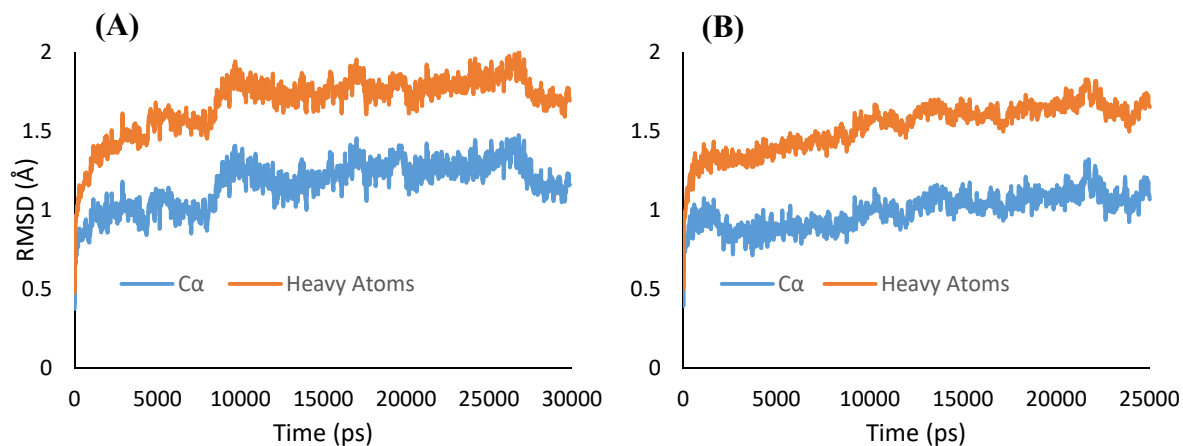

**Figure S8.** Evolution of distances between catalytic residues and the scissile bond during the simulation in (A) **1 $\alpha$**  and (B) **1 $\beta$**  complex

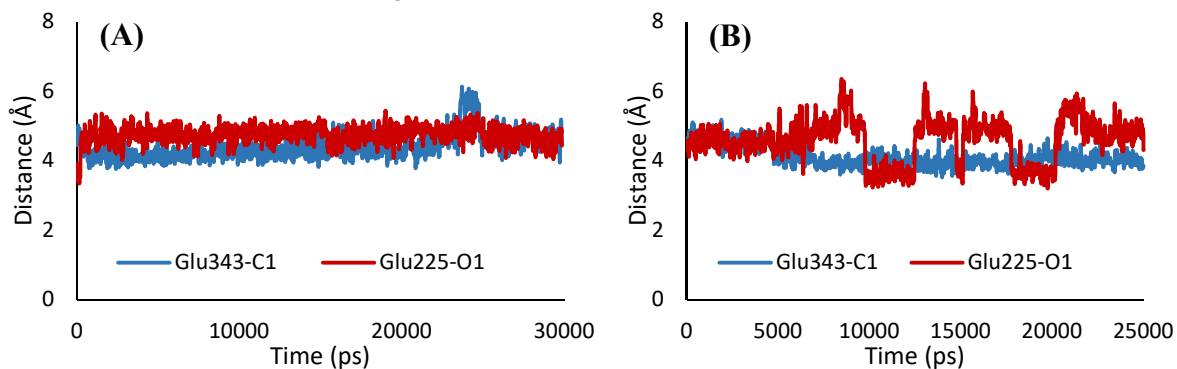

**Figure S9.** Example snapshots of hydrogen bonding pattern of (A)  $1\alpha$  and (B)  $1\beta$  complex during MD simulation

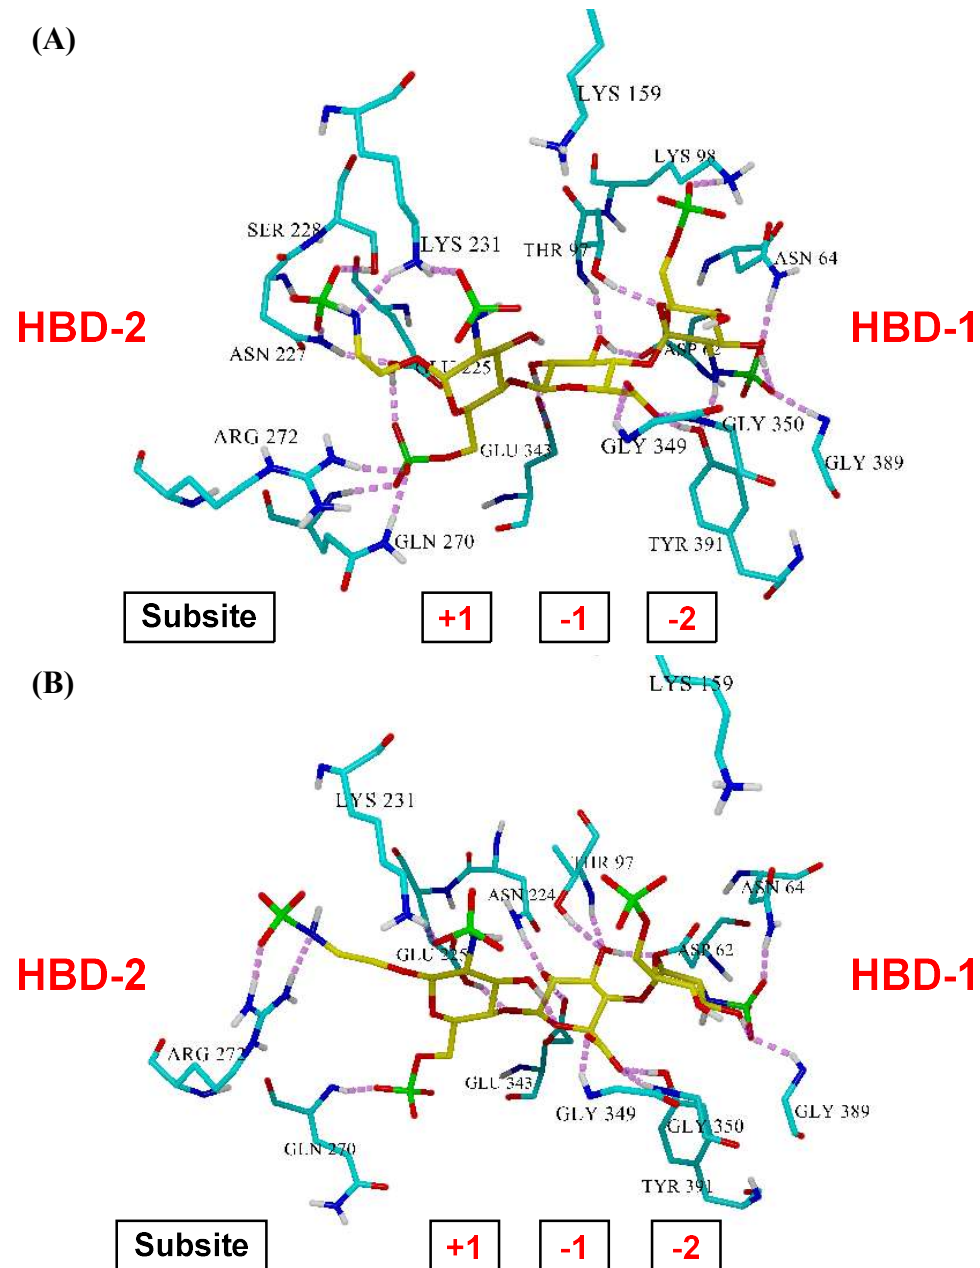

## 10. Reference

- (1) Loka, R. S.; Sletten E. T.; Barash, U.; Vlodayvsky, I.; Nguyen, H. M. Specific inhibition of heparanase by a glycopolymer with well-defined sulfation pattern prevents breast cancer metastasis in mice. *ACS Appl. Mater. Interface* **2019**, *11* (1), 244-254.
- (2) Loka, R. S.; Yu, F.; Sletten, E. T.; Nguyen, H. M. Design, synthesis, and evaluation of heparan sulfate mimicking glycopolymers for inhibiting heparanase activity. *Chem. Commun.* **2017**, *53* (65), 9163-9166.
- (3) Cochran, S.; Li, C.; Ferro, V. A surface plasmon resonance-based solution affinity assay for heparan sulfate-binding proteins. *Glycoconjugate J.* **2009**, *26* (5), 577-587.
- (4) Chai, S.; Lu, J.; Ye, Q. Determination of binding affinity of metal cofactor to the active site of methionine aminopeptidase based on quantitation of functional enzyme. *Anal. Biochem.* **2009**, *395* (2), 263-264.
- (5) Sletten, E. T.; Loka, R. S.; Yu, F.; Nguyen, H. M., Glycosidase inhibition by multivalent presentation of heparan sulfate saccharides on bottlebrush polymers. *Biomacromolecules* **2017**, *18* (10), 3387-3399.
- (6) Wu, L.; Viola, C. M.; Brzozowski, A. M.; Davies, G. J., Structural characterization of human heparanase reveals insights into substrate recognition. *Nat. Struct. Mol. Biol.* **2015**, *22* (12), 1016-1022.
- (7) Dennington, R. K., Todd A.; Millam, John M. *GaussView*, 5; Semichem Inc.: Shawnee Mission, KS, 2016.
- (8) Trott, O.; Olson, A. J., Software news and update AutoDock Vina: improving the speed and accuracy of docking with a new scoring function, efficient optimization, and multithreading. *J. Comput. Chem.* **2010**, *31* (2), 455-461.
- (9) Case, D. A.; Babin, V.; Berryman, J. T.; Betz, R. M.; Cai, Q.; Cerutti, D. S.; Cheatham, I., T.E.; Darden, T. A.; Duke, R. E.; Gohlke, H.; Goetz, A. W.; Gusarov, S.; Homeyer, N.; Janowski, P.; Kaus, J.; Kolossváry, I.; Kovalenko, A.; Lee, T. S.; LeGrand, S.; Luchko, T.; Luo, R.; Madej, B.; Merz, K. M.; Paesani, F.; Roe, D. R.; Roitberg, A.; Sagui, C.; Salomon-Ferrer, R.; Seabra, G.; Simmerling, C. L.; Smith, W.; Swails, J.; Walker, R. C.; Wang, J.; Wolf, R. M.; Wu, X.; Kollman, P. A., *AMBER 14*. University of California: San Francisco, 2014.
- (10) Kirschner, K. N.; Yongye, A. B.; Tschampel, S. M.; Gonzalez-Outeirino, J.; Daniels, C. R.; Foley, B. L.; Woods, R. J., GLYCAM06: A generalizable biomolecular force field. *Carbohydrates. J. Comput. Chem.* **2008**, *29* (4), 622-655.
- (11) Mahoney, M. W.; Jorgensen, W. L., A five-site model for liquid water and the reproduction of the density anomaly by rigid, nonpolarizable potential functions. *J. Chem. Phys.* **2000**, *112* (20), 8910-8922.
- (12) Vlodayvsky I. Preparation of extracellular matrices produced by cultured corneal endothelial and PF-HR9 endodermal cells. *Curr Protoc Cell Biol.* **2001**; *Chapter 10*, Unit 10.4
- (13) Vlodayvsky, I., Fuks, Z., Bar-Ner, M., Ariav, Y. and Schirrmacher, V. Lymphoma cell mediated degradation of sulfated proteoglycans in the subendothelial extracellular matrix: Relationship to tumor cell metastasis. *Cancer Res.* **1983**, *43* (6), 2704-2711.
- (14) Vlodayvsky, I., Friedmann, Y., Elkin, M., Aingorn, H., Atzmon, A., Ishai-Michaeli, R., Bitan, M., Pappo, O., Peretz, T., Michal, I., Spector, L., and Pecker, I. Mammalian heparanase: gene cloning, expression and function in tumor progression and metastasis. *Nature Med.* **1999**, *5* (7), 793-802.

- (15) Barner, M.; Kramer, M. D.; Schirmacher, V.; Ishaimichaeli, R.; Fuks, Z.; Vlodavsky, I., Sequential degradation of heparan-sulfate in the subendothelial extracellular-matrix by highly metastatic lymphoma-cells. *Int. J. Cancer* **1985**, *35* (4), 483-491.
- (16) Naggi, A., Casu, B., Perez, M., Torri, G., Cassinelli, G., Penco, S., Pisano, C., Giannini, G., Ishai-Michaeli, R., and Vlodavsky, I. Modulation of the heparanase-inhibiting activity of heparin through selective desulfation, graded N-acetylation, and glycol-splitting. *J Biol. Chem.* **2005**, *280* (13), 12103-12113.
- (17) Fang, J.; Liu, M.; Zhang, X.; Sakamoto, T.; Taatjes, D. J.; Jena, B. P.; Sun, F.; Woods, J.; Bryson, T.; Kowluru, A.; Zhang, K.; Chen, X. COPII-dependent ER export: a critical component of insulin biogenesis and  $\beta$ -cell ER homeostasis. *Mol. Endocrinol.* **2015**, *29* (8), 1156-1169.

## 11. Mass Spectra

### 11.1. Detection for Microwave-Assisted Sulfonation Reaction

Using 3 equiv  $\text{SO}_3 \cdot \text{TEA}$  gave **56** as a majority

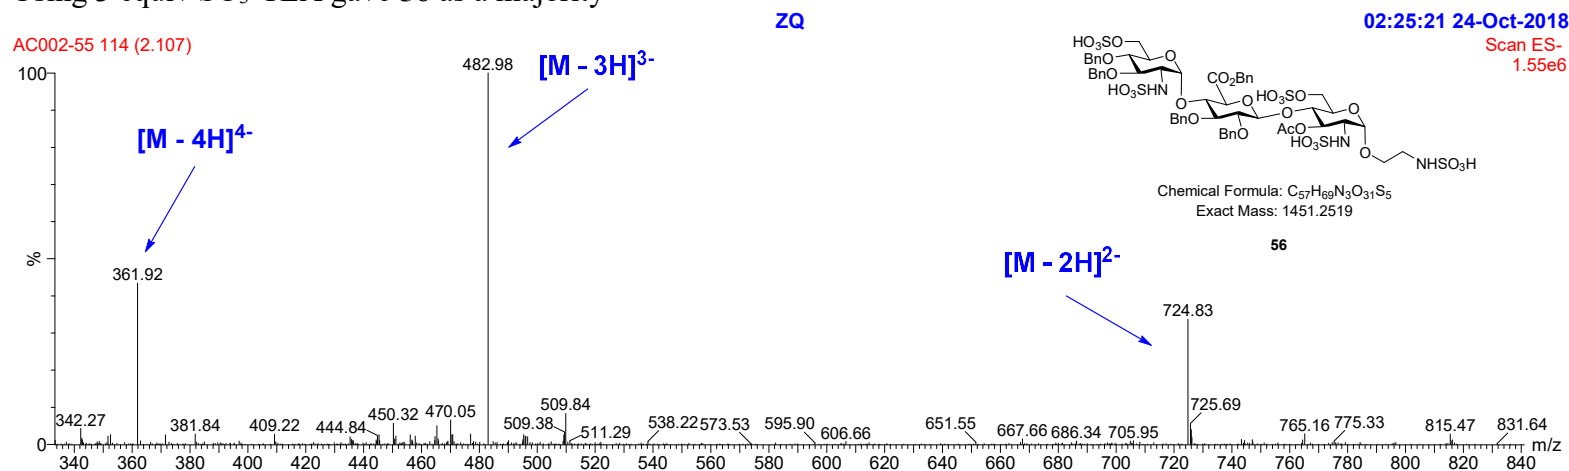

Using 5 equiv  $\text{SO}_3 \cdot \text{TEA}$  produced more **57** as side-product

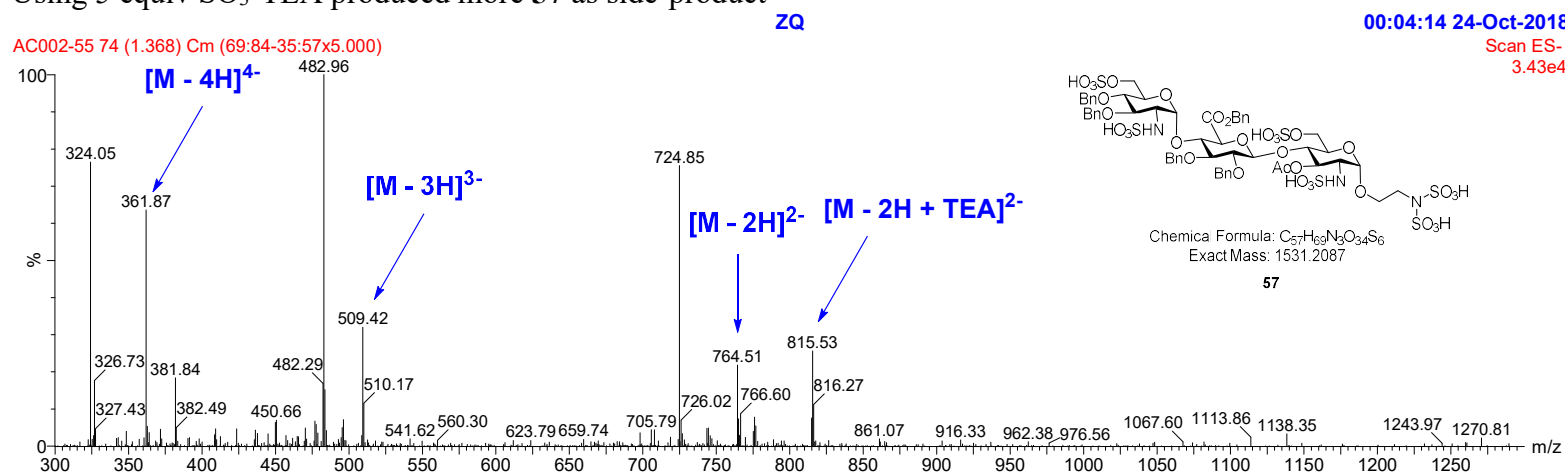

**Figure S6.** Microwave assisted sulfonation monitored by negative-mode mass, indicating 3 equiv  $\text{SO}_3 \cdot \text{TEA}$  was good.



ACN-PURE 685 (12.661) Cm (679:693)

ZQ

11:55:15 06-Nov-2018

Scan ES-  
3.70e5

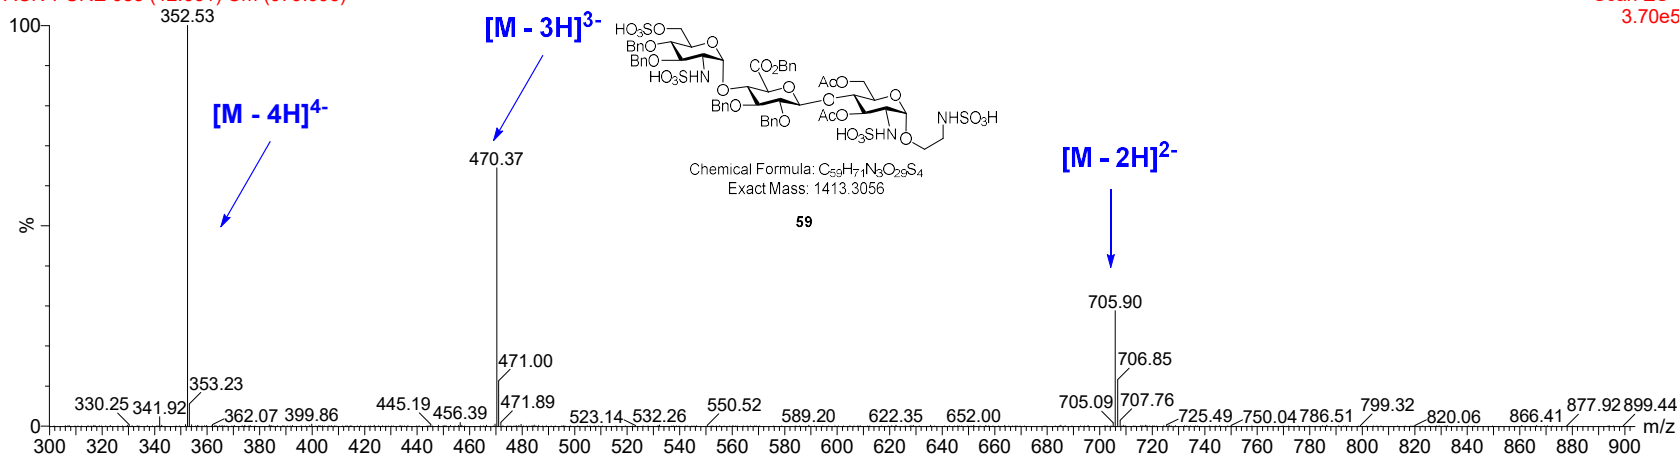

BLUENH32POS 845 (15.618) Cm (838:855)

ZQ

18:17:48 19-Sep-2018

Scan ES-  
2.32e6

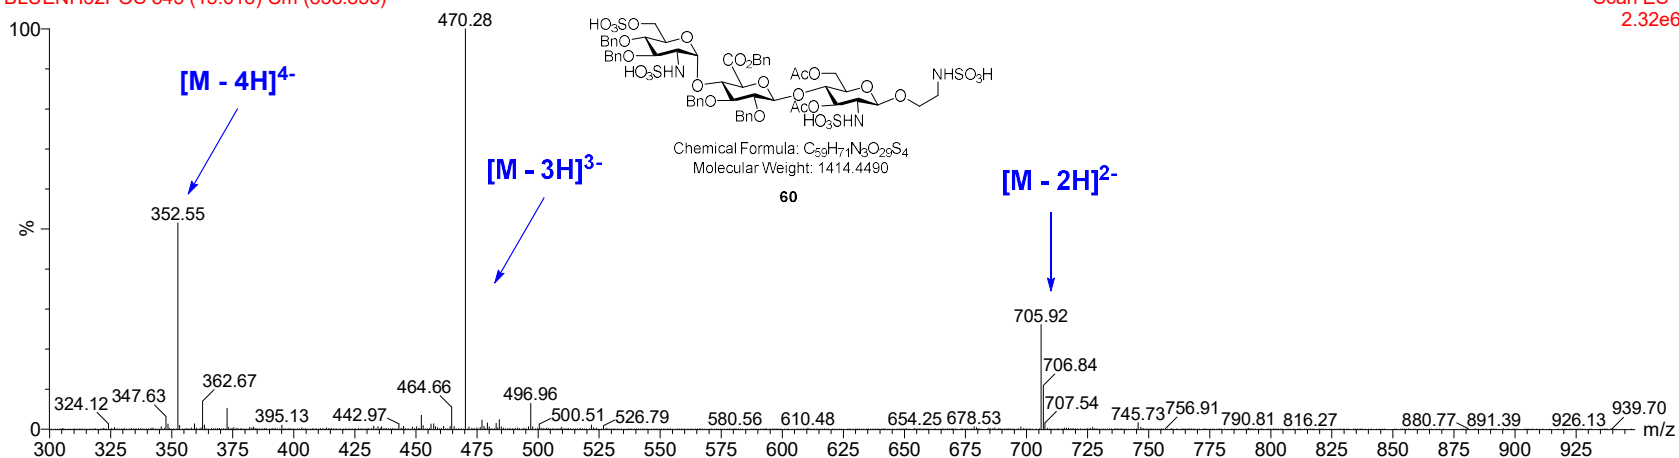

AC002-55 73 (1.349)

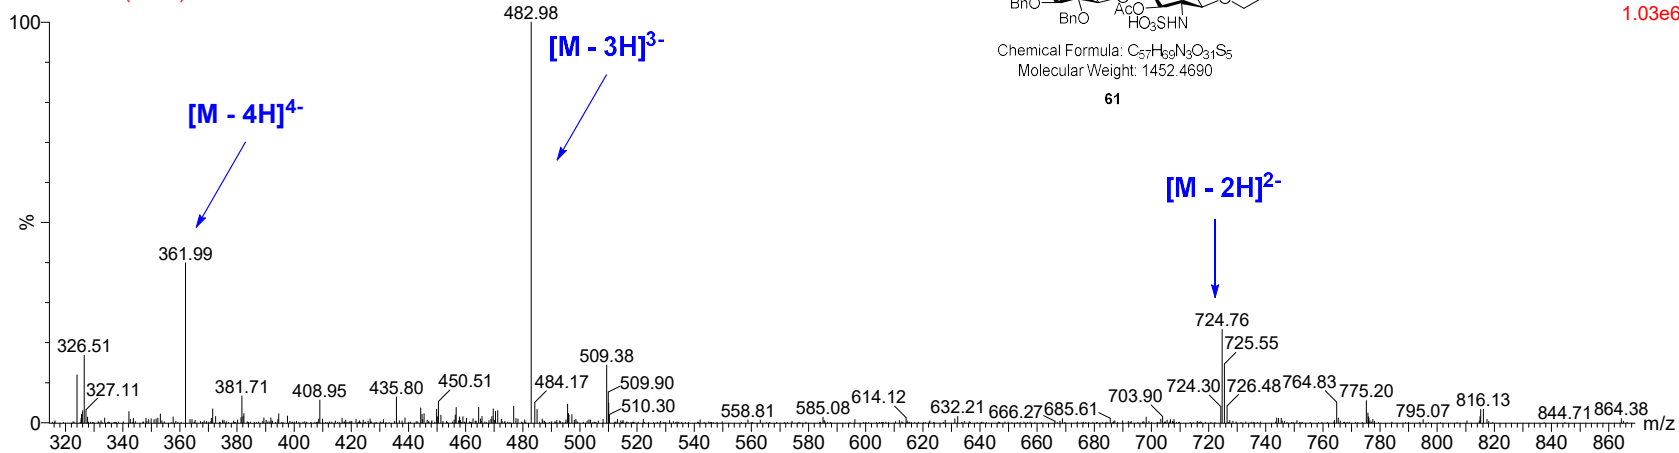

ZQ

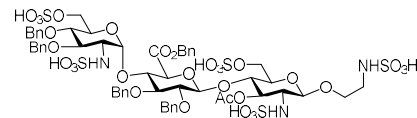

Chemical Formula: C<sub>27</sub>H<sub>39</sub>N<sub>3</sub>O<sub>31</sub>S<sub>5</sub>  
Molecular Weight: 1452.4690

61

04:11:13 24-Oct-2018

Scan ES-

1.03e6

UM-RXN-EL-4-PRD-A 1263 (23.344) Cm (1260:1276)

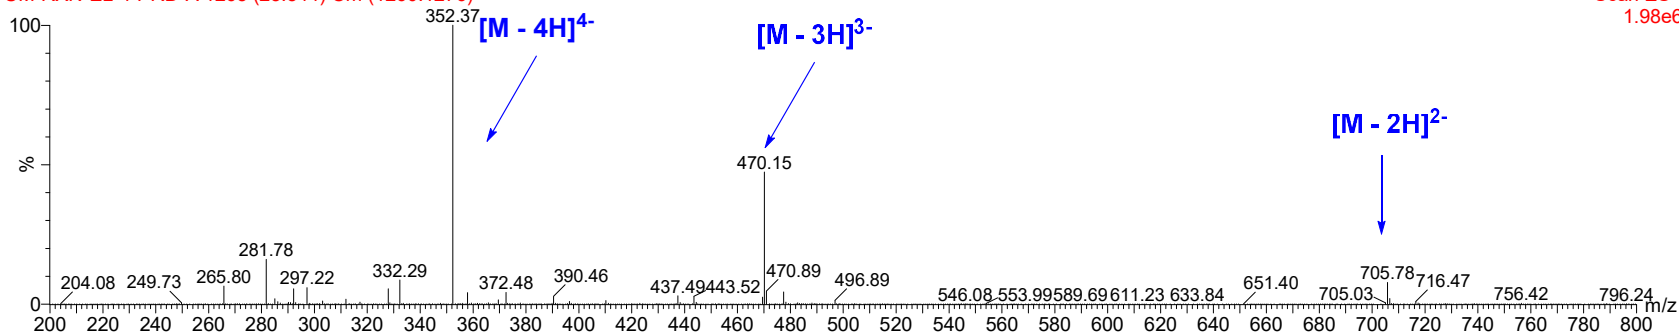

ZQ

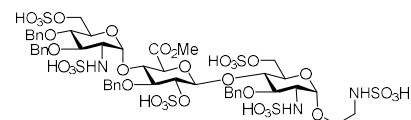

Chemical Formula: C<sub>49</sub>H<sub>63</sub>N<sub>3</sub>O<sub>33</sub>S<sub>6</sub>  
Exact Mass: 1413.1668

62

13:41:43 23-Jul-2019

Scan ES-

1.98e6

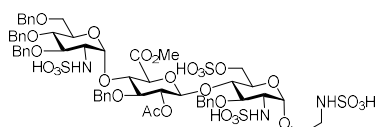

Chemical Formula:  $C_{58}H_{71}N_3O_{28}S_4$   
Molecular Weight: 1386.4390

63

2RJBJ41 245 (4.528)

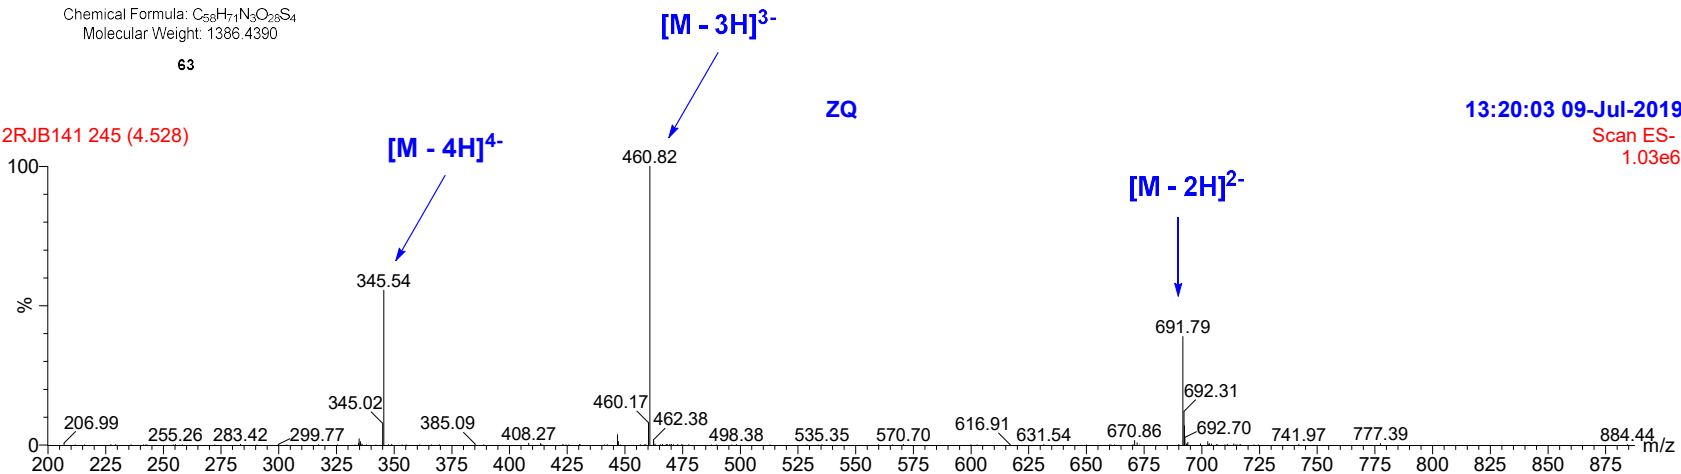

ZQ

13:20:03 09-Jul-2019

Scan ES-  
1.03e6

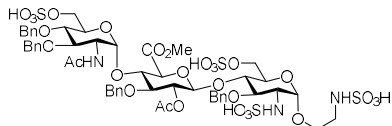

Chemical Formula:  $C_{53}H_{67}N_3O_{29}S_4$   
Molecular Weight: 1338.3510

64

071019 FRIEDEL CRAFT ACYLATION2 627 (11.589)

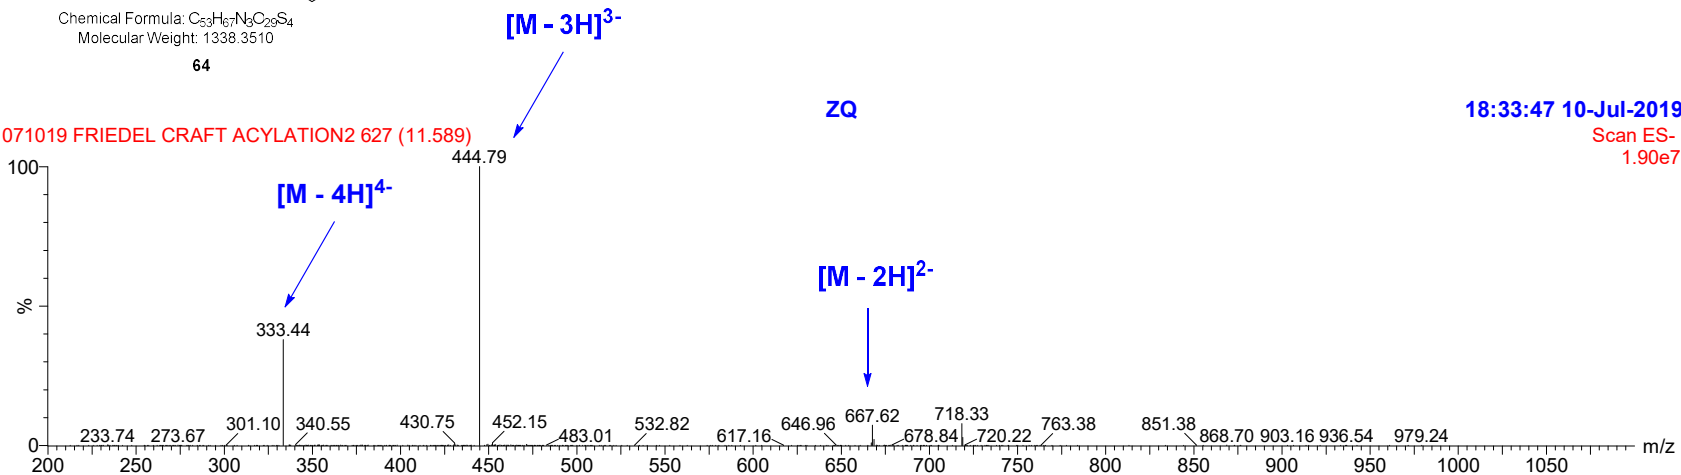

ZQ

18:33:47 10-Jul-2019

Scan ES-  
1.90e7

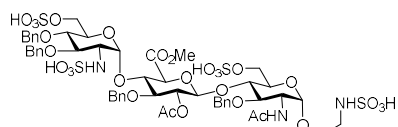

Chemical Formula:  $C_{53}H_{67}N_3O_{29}S_4$   
Molecular Weight: 1338.3510

65

BLANK TEST 522 (9.648)

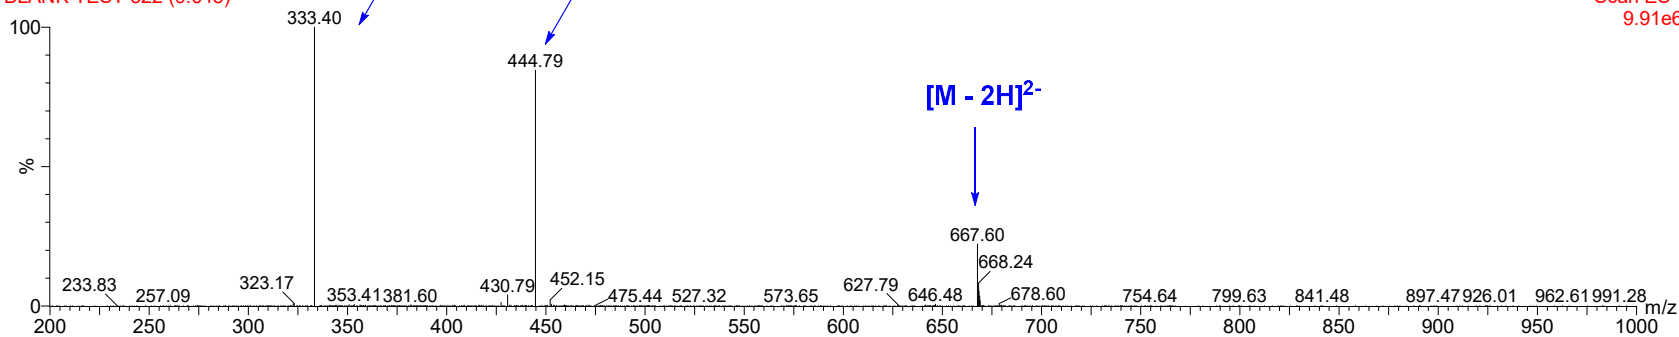

$[M - 4H]^{4-}$

$[M - 3H]^{3-}$

ZQ

14:04:29 10-Jul-2019

Scan ES-  
9.91e6

$[M - 2H]^{2-}$

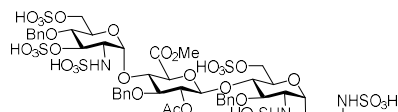

Chemical Formula:  $C_{44}H_{59}N_3O_{34}S_6$   
Molecular Weight: 1366.3030

66

SA-1-27\_MEOH\_2 791 (14.620) Cm (779:804)

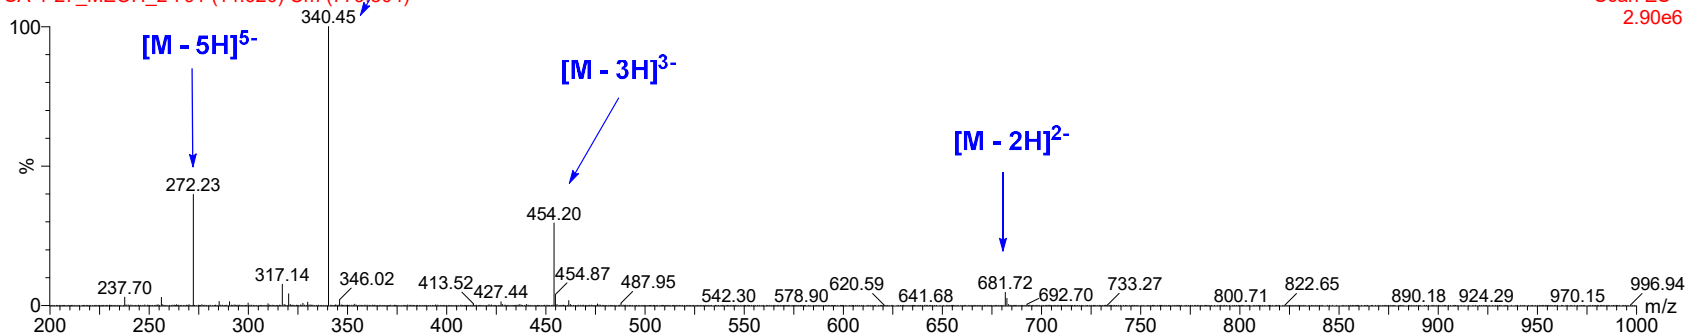

$[M - 4H]^{4-}$

$[M - 3H]^{3-}$

ZQ

13:58:49 18-Jul-2019

Scan ES-  
2.90e6

$[M - 2H]^{2-}$

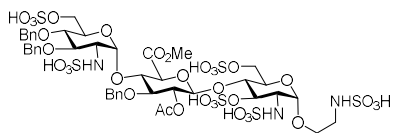

Chemical Formula:  $C_{44}H_{69}N_3C_{34}S_6$   
Molecular Weight: 1366.3030

67

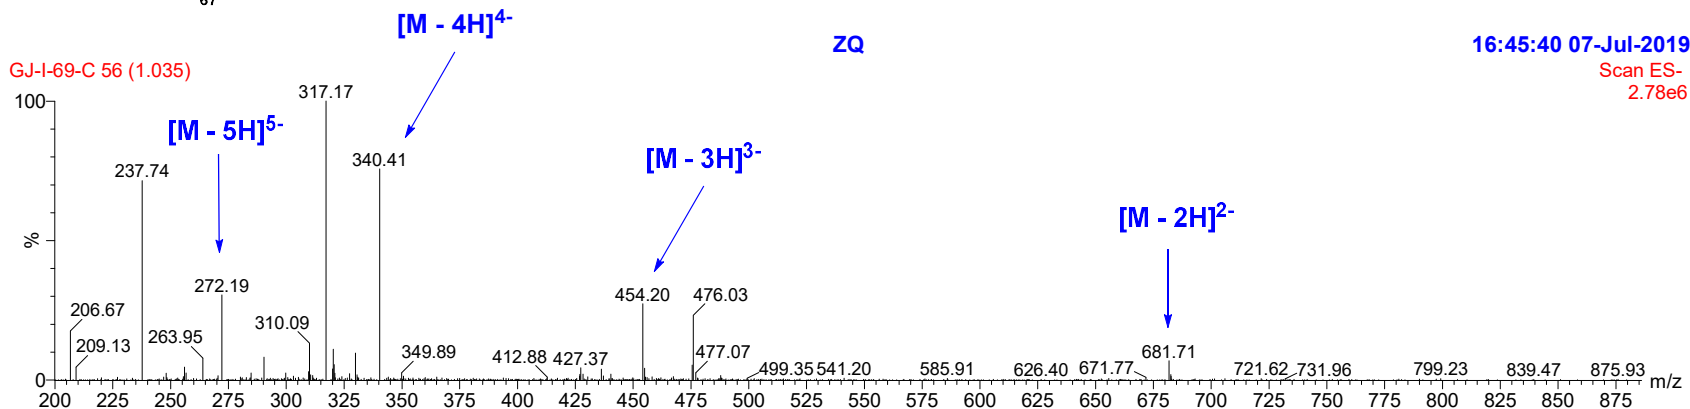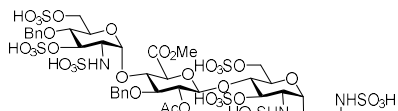

Chemical Formula:  $C_{27}H_{53}N_3O_{27}S_7$   
Molecular Weight: 1356.2350

68

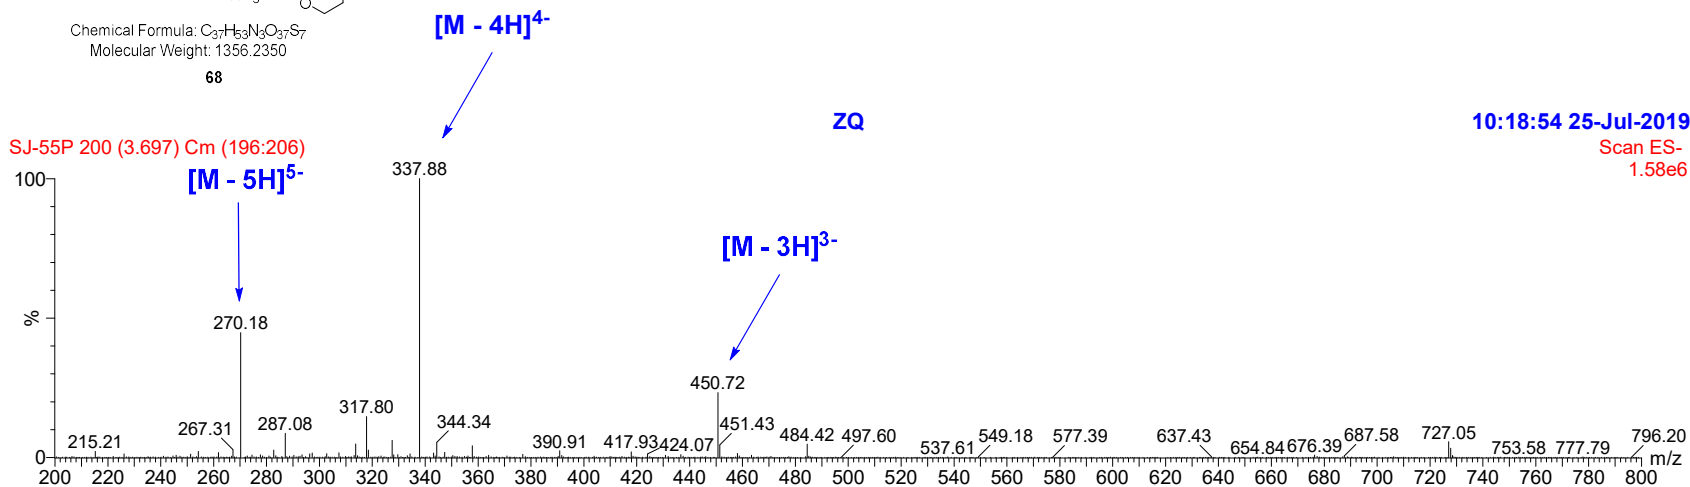

## 11.2. Mass Spectra for the Final HS Trisaccharides

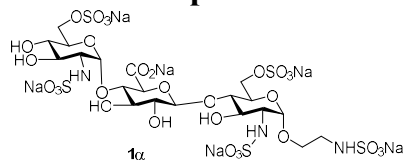

Chemical Formula: C<sub>20</sub>H<sub>31</sub>N<sub>3</sub>Na<sub>6</sub>O<sub>30</sub>S<sub>5</sub>  
Exact Mass: 1090.90

ZSY-1-50\_200303121311 #7-22 RT: 0.19-0.66 AV: 16 NL: 2.67E5  
T: FTMS - c ESI Full ms [200.00-2000.00]

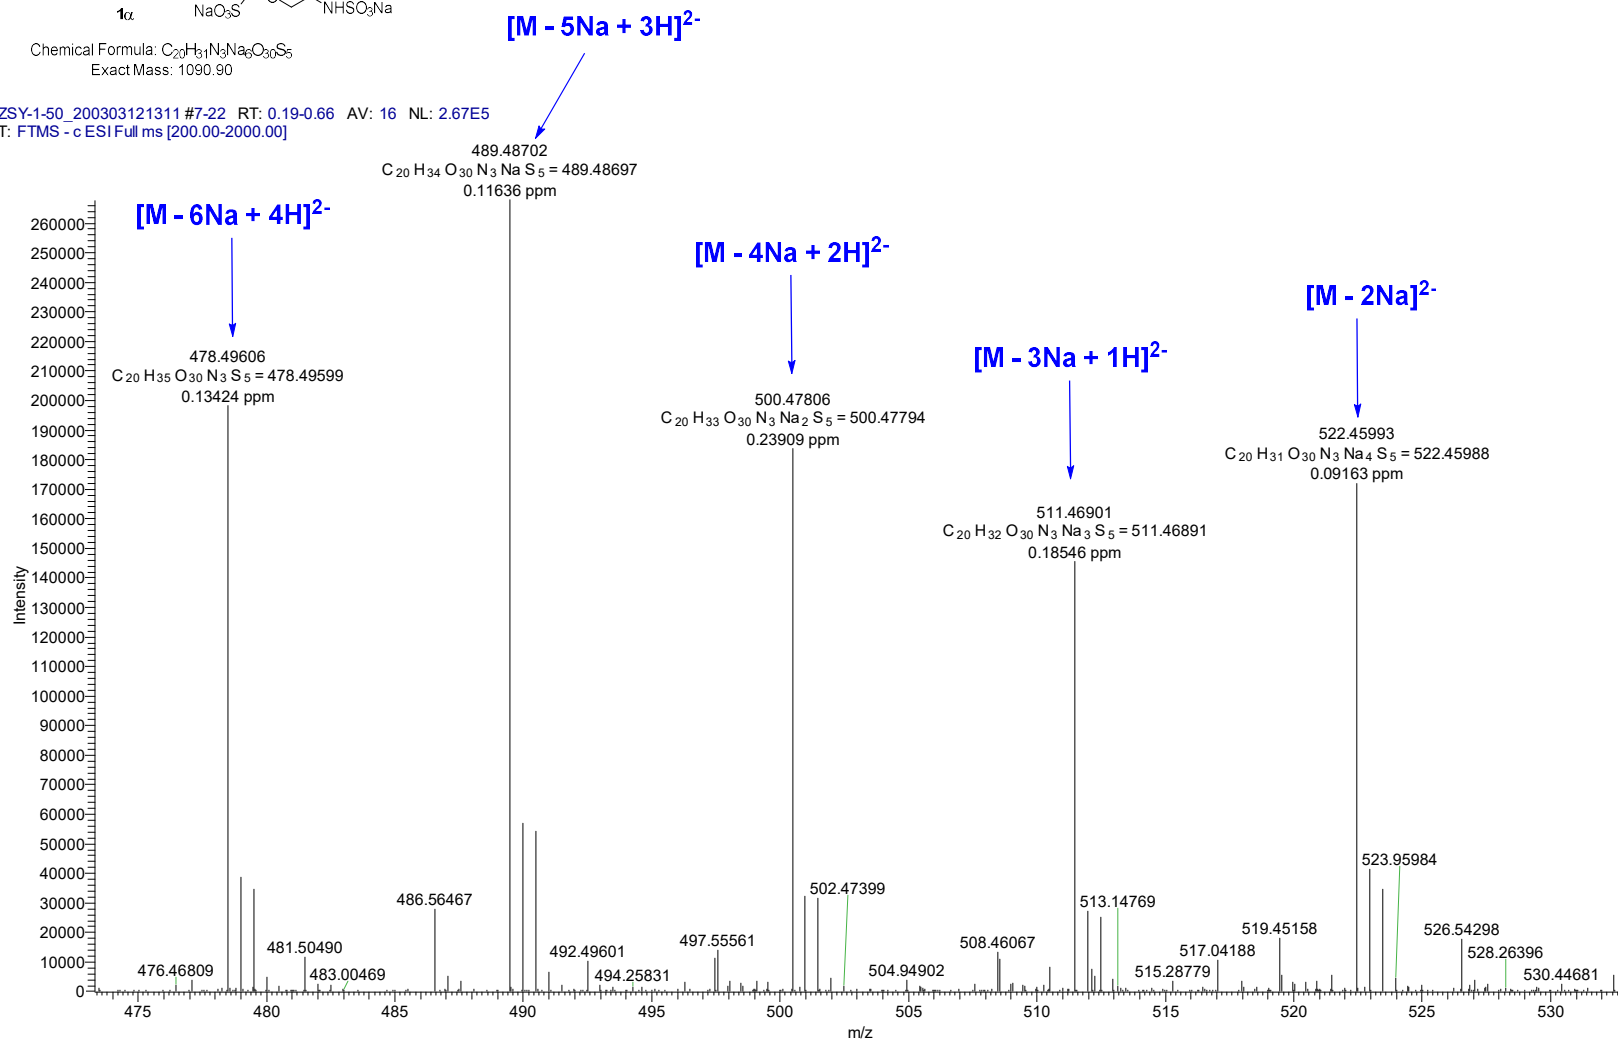

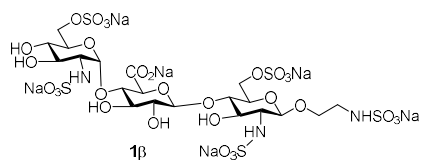

Chemical Formula:  $C_{20}H_{31}N_3Na_5O_{30}S_5$   
 Exact Mass: 1090.90

ZSY-1-58 #3-14 RT: 0.04-0.37 AV: 12 NL: 4.75E4  
 T: FTMS - c ESI Full ms [200.00-2000.00]

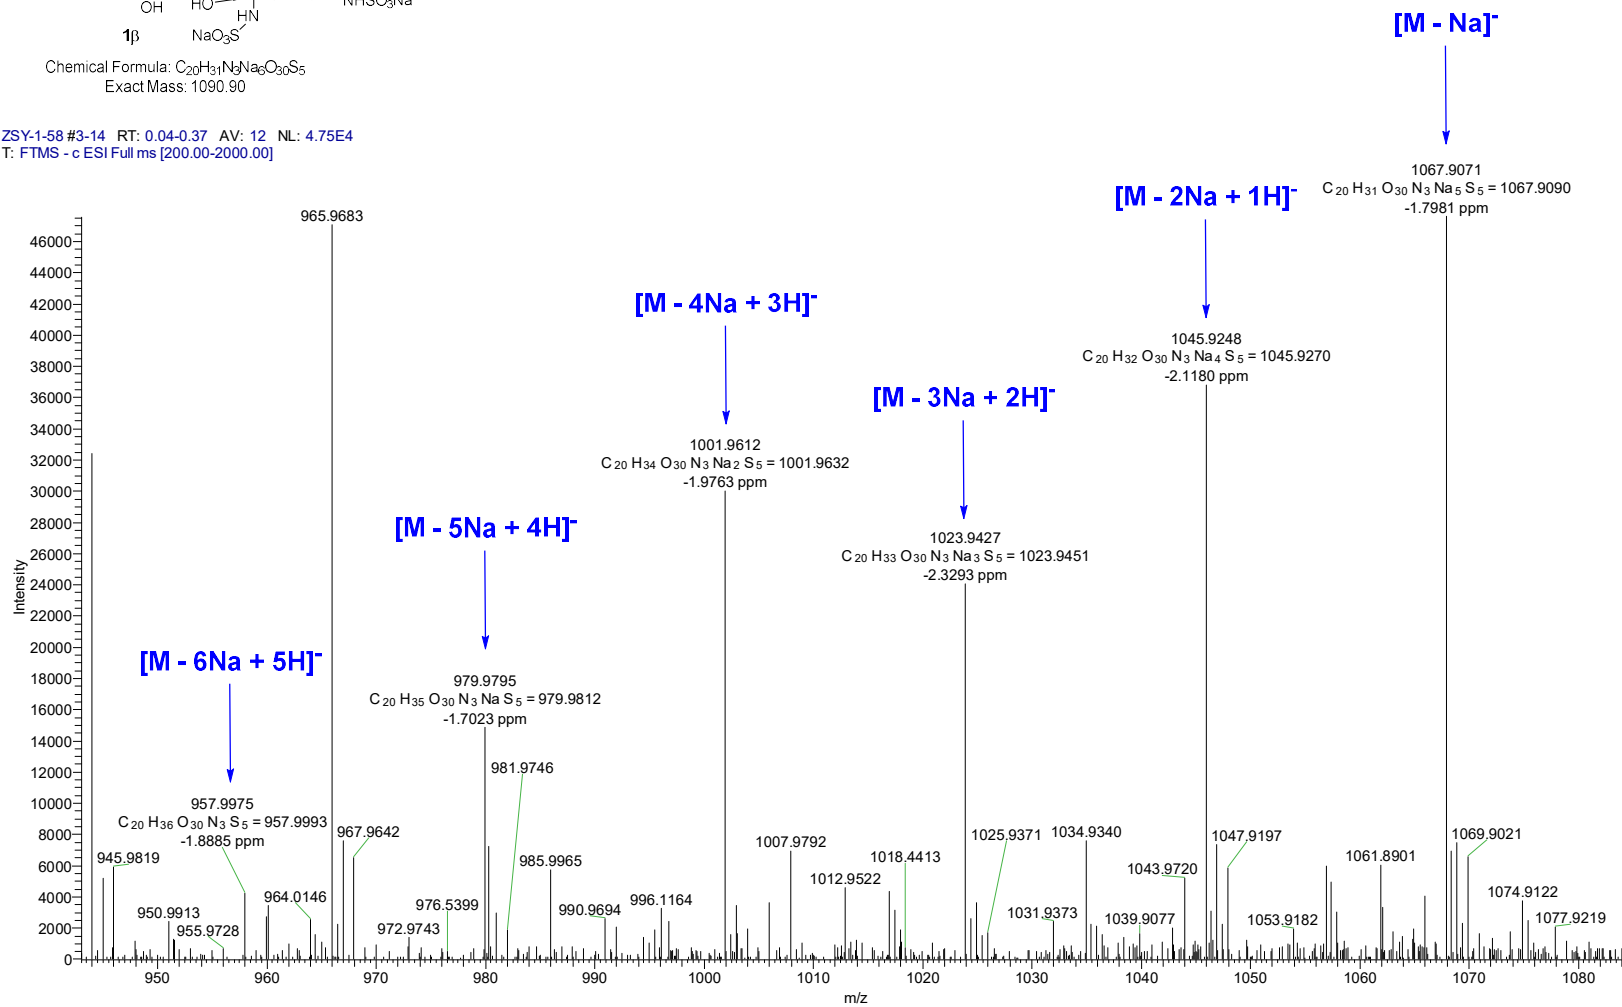

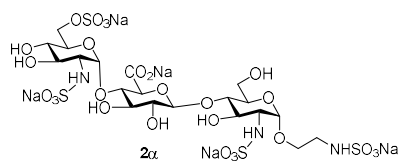

Chemical Formula: C<sub>20</sub>H<sub>32</sub>N<sub>3</sub>Na<sub>5</sub>O<sub>27</sub>S<sub>4</sub>  
 Exact Mass: 988.96

ZSY-1-82 #2-16 RT: 0.01-0.44 AV: 15 NL: 2.35E5  
 T: FTMS - c ESI Full ms [200.00-2000.00]

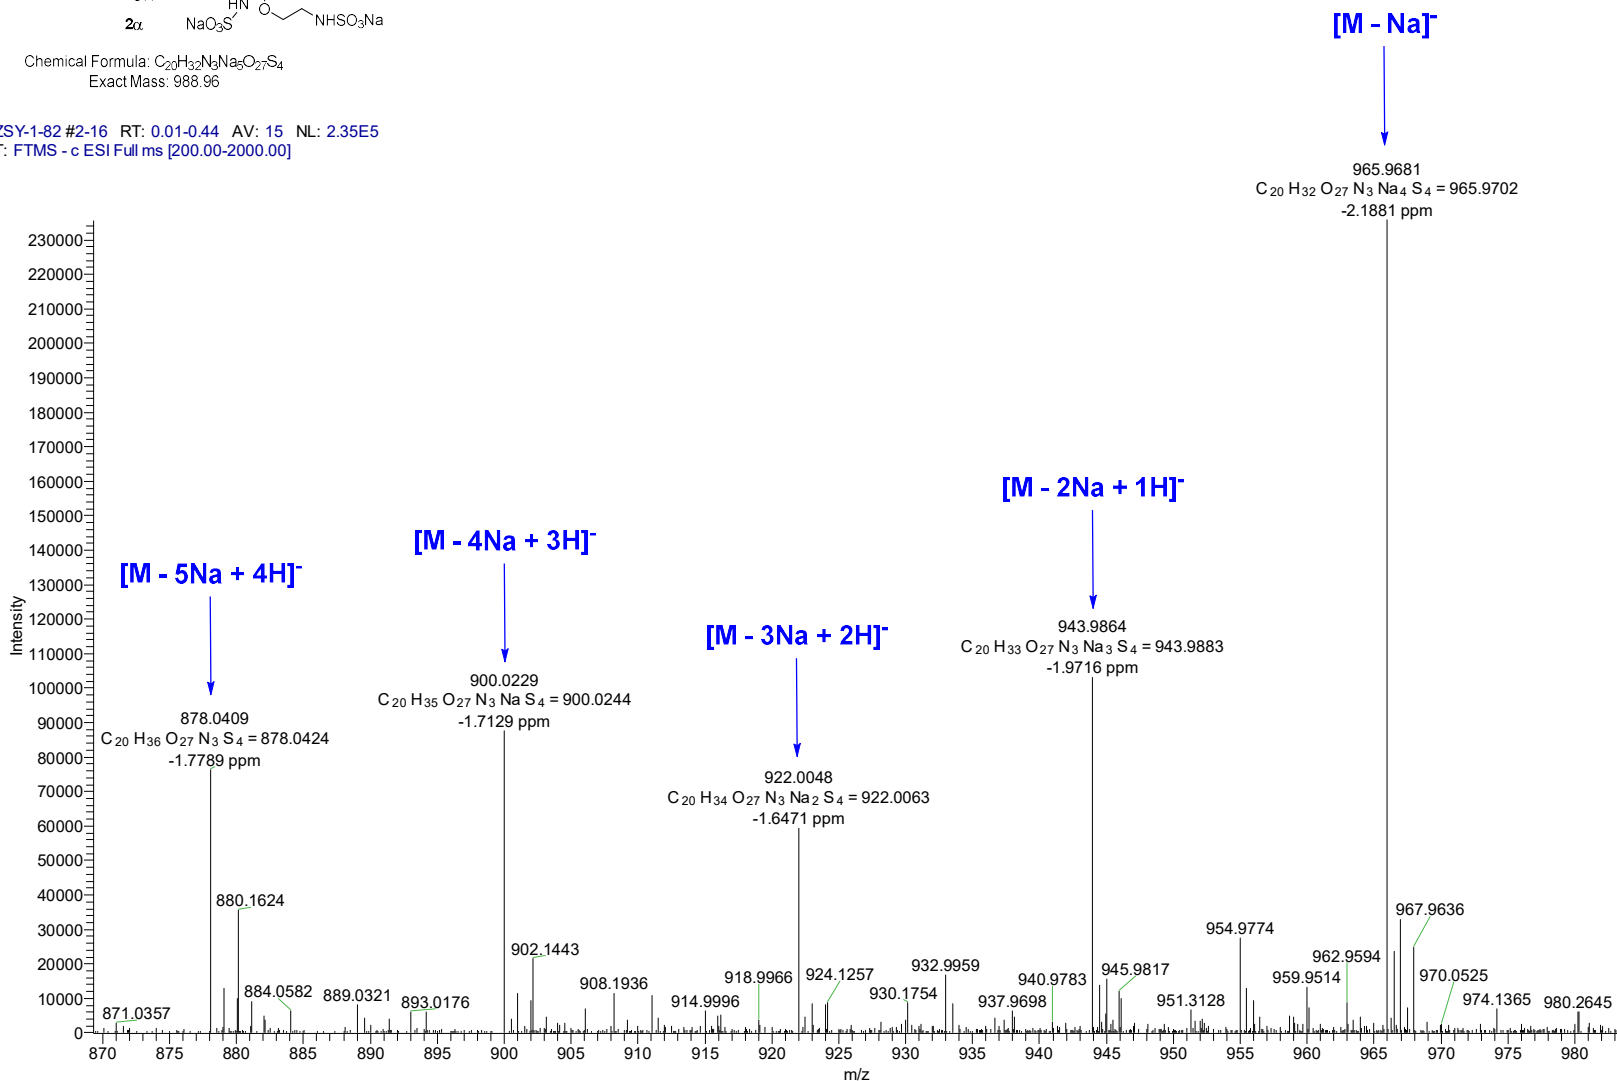



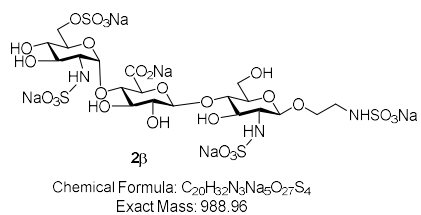

ZSY-1-84 #2-16 RT: 0.01-0.44 AV: 15 NL: 2.57E5  
 T: FTMS - c ESI Full ms [200.00-2000.00]

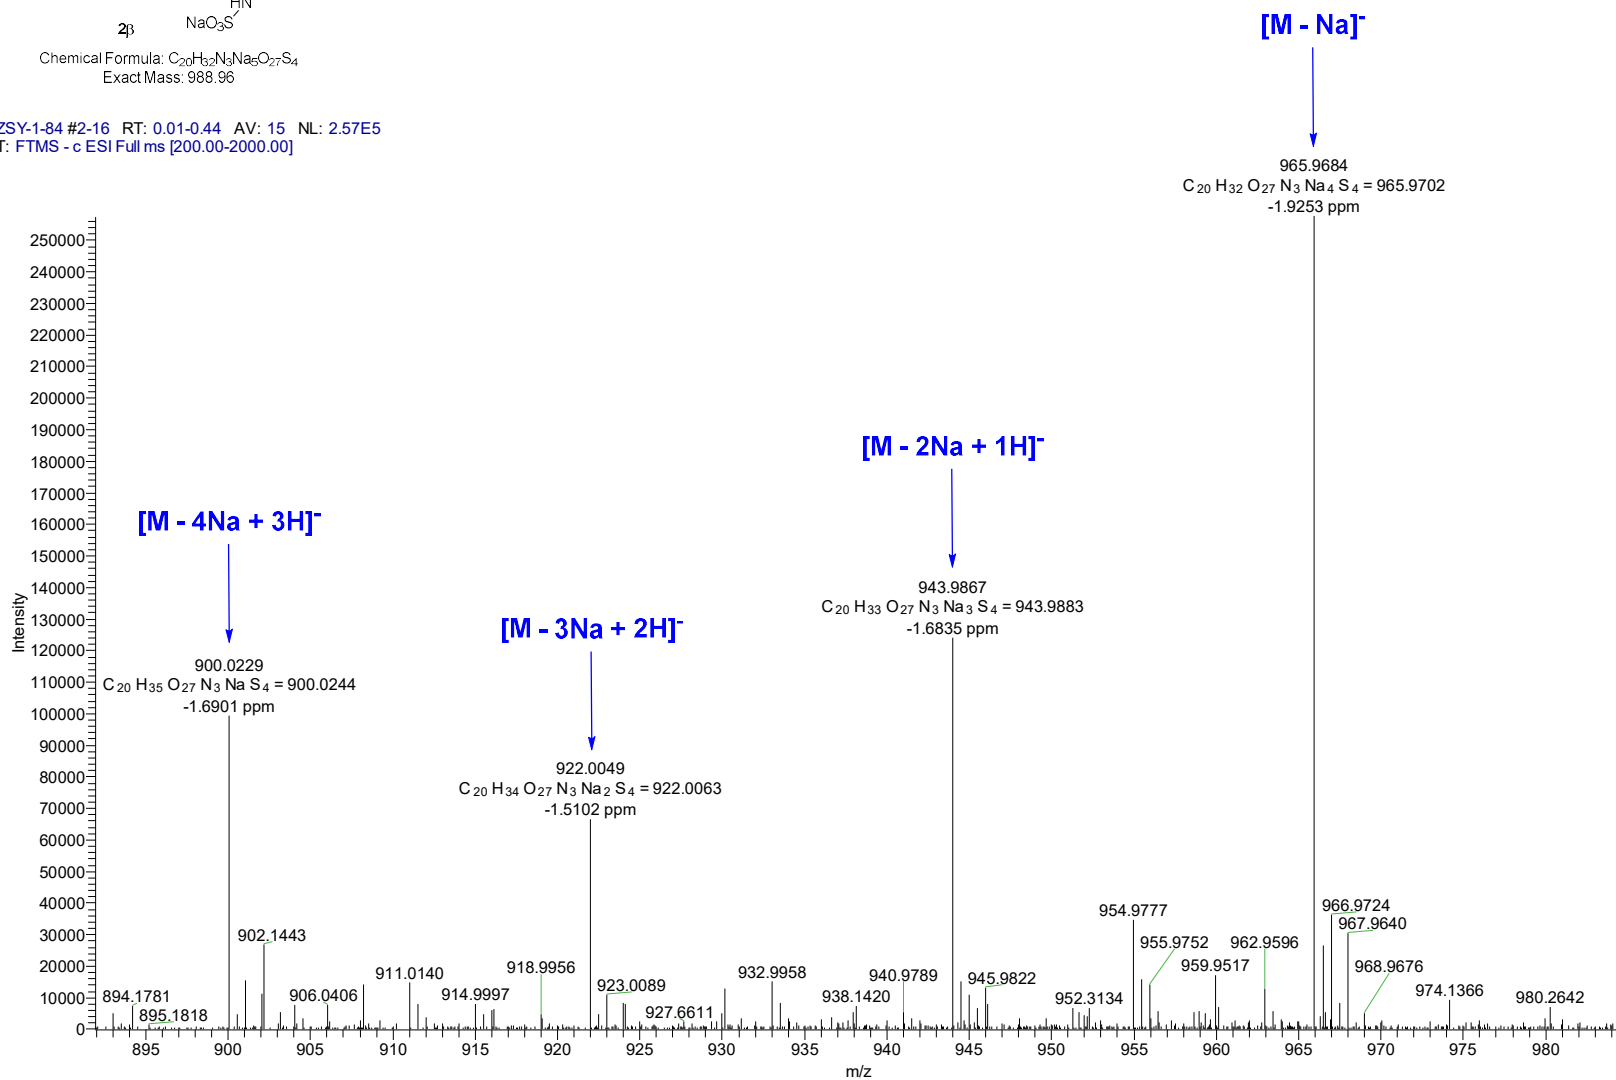

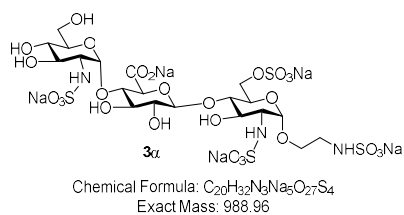

ZSY-2-46 #3-18 RT: 0.04-0.50 AV: 16 NL: 3.92E5  
T: FTMS - c ESI Full ms [200.00-2000.00]

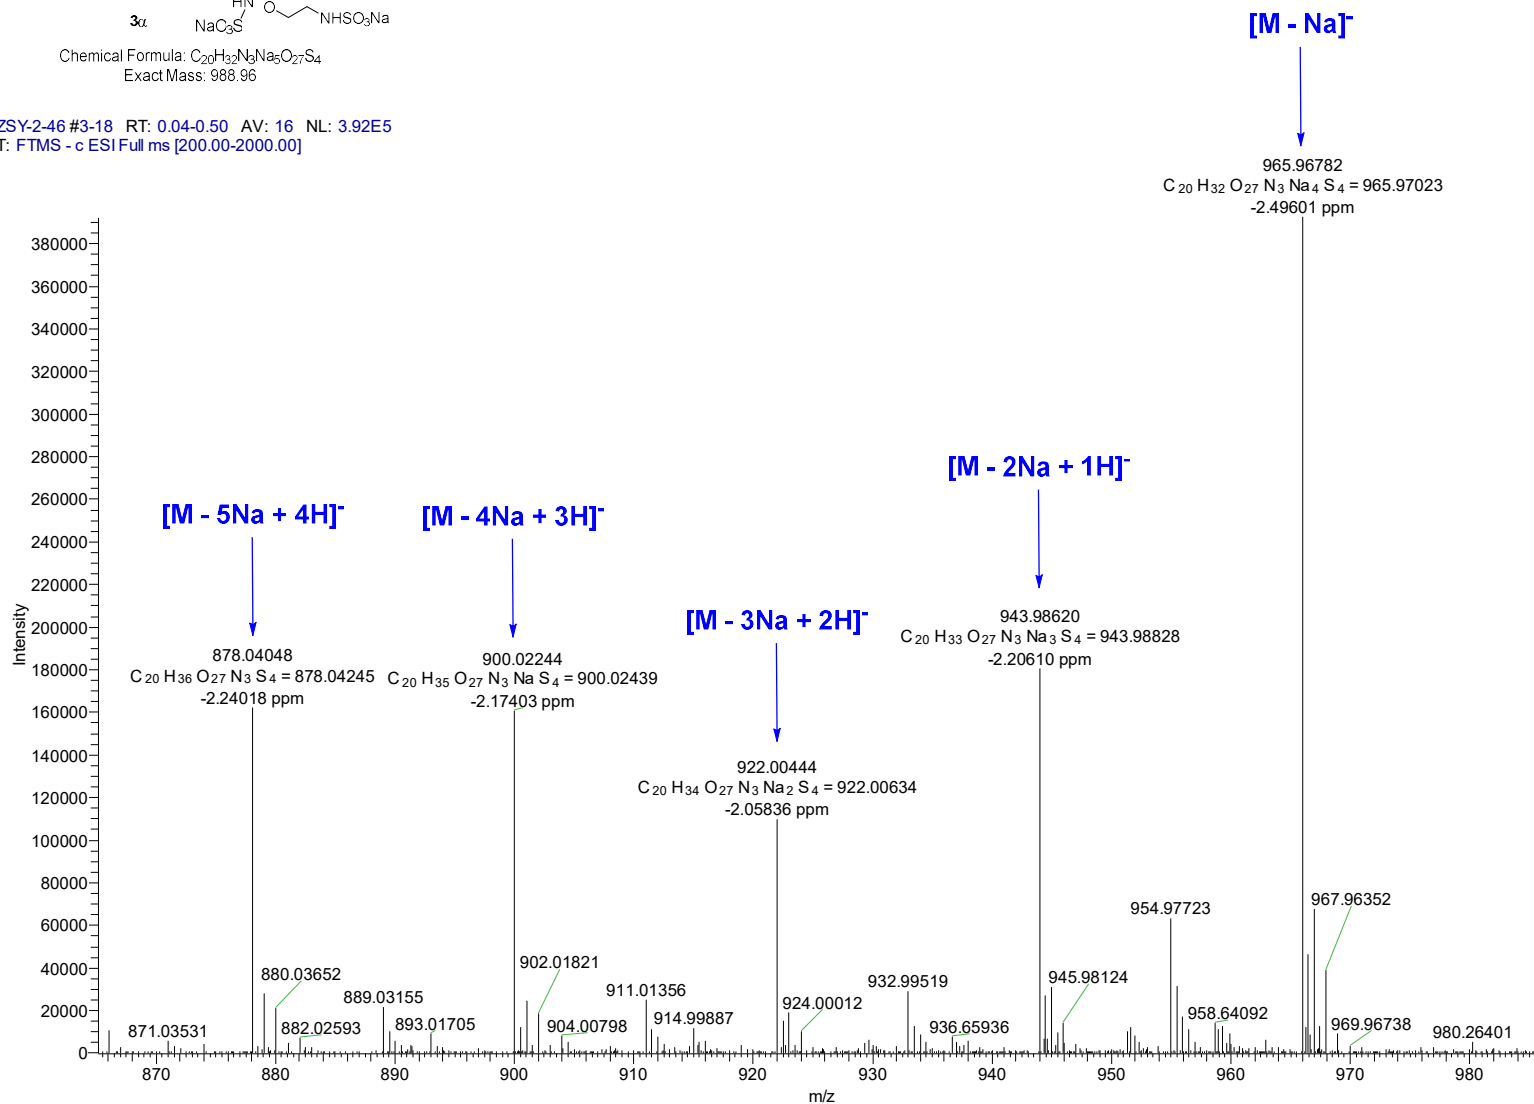

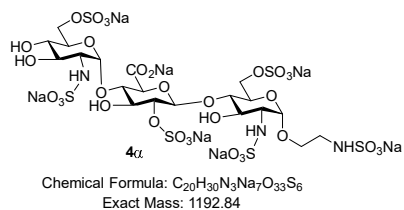

ZSY-2-48 #3-20 RT: 0.04-0.55 AV: 18 NL: 1.89E6  
T: FTMS - c ESI Full ms [200.00-2000.00]

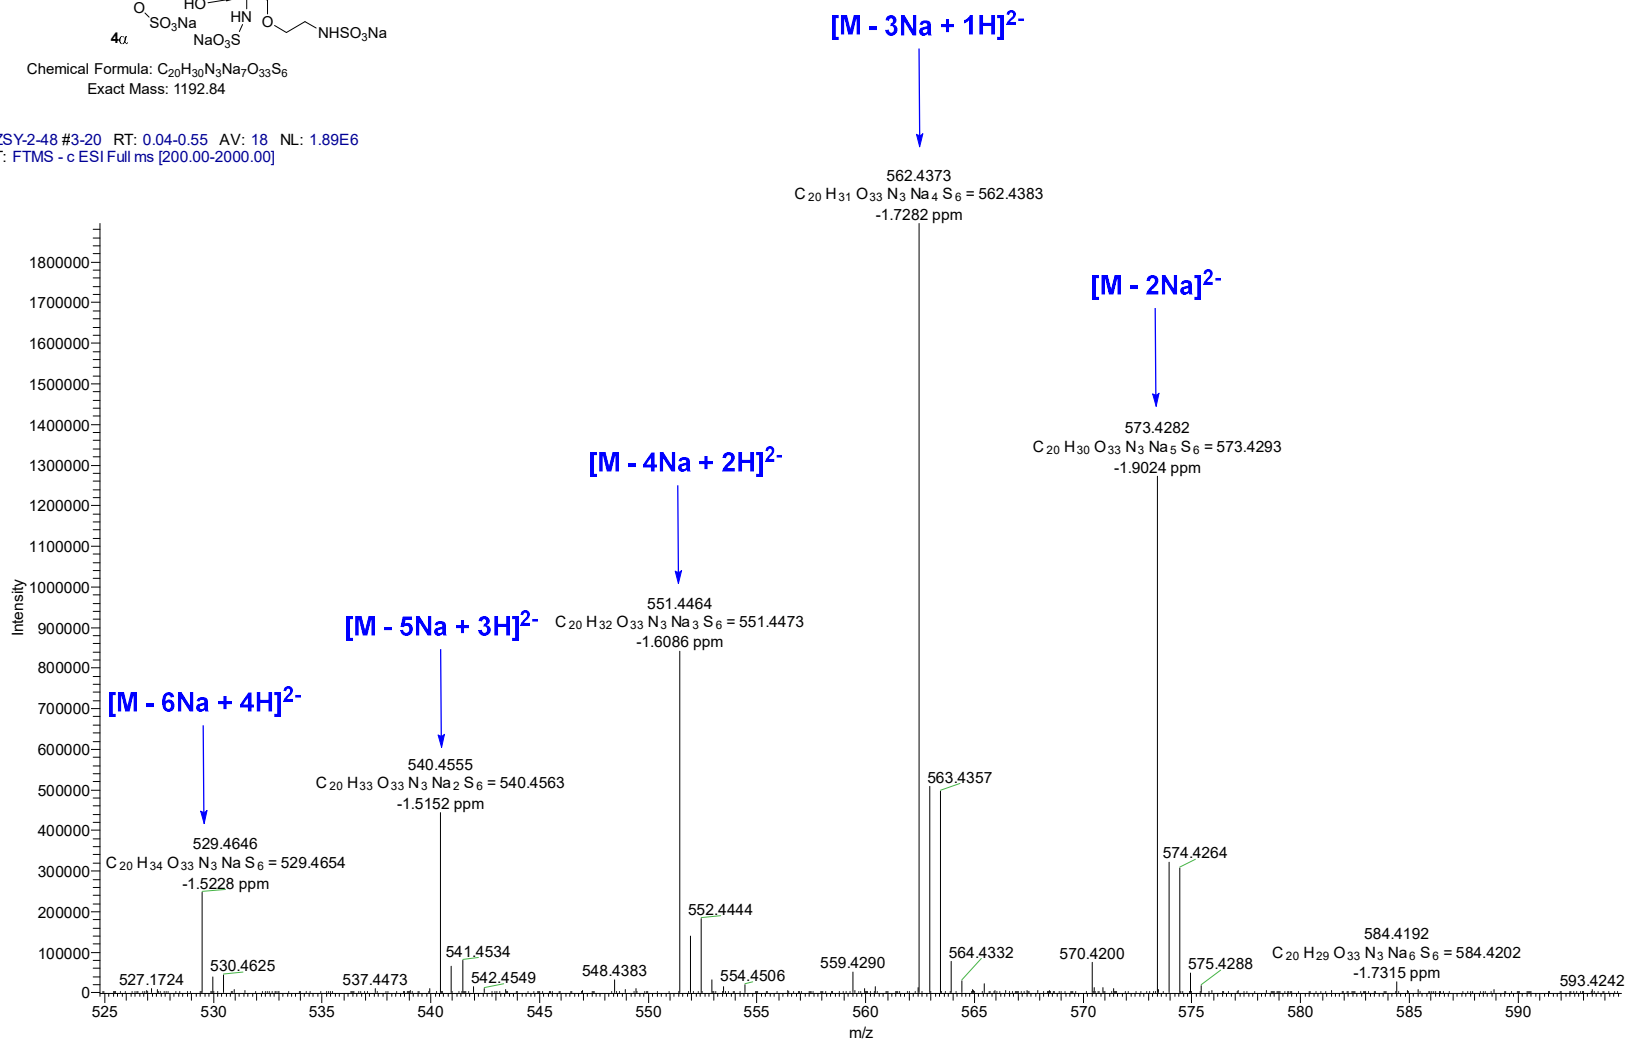

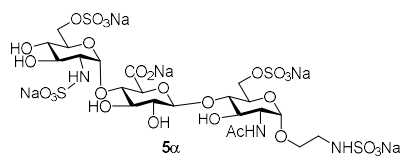

Chemical Formula: C<sub>22</sub>H<sub>34</sub>N<sub>3</sub>Na<sub>5</sub>O<sub>28</sub>S<sub>4</sub>  
 Exact Mass: 1030.97

ZSY-2-49 #4-6 RT: 0.07-0.13 AV: 3 NL: 2.08E6  
 T: FTMS - c ESI Full ms [200.00-2000.00]

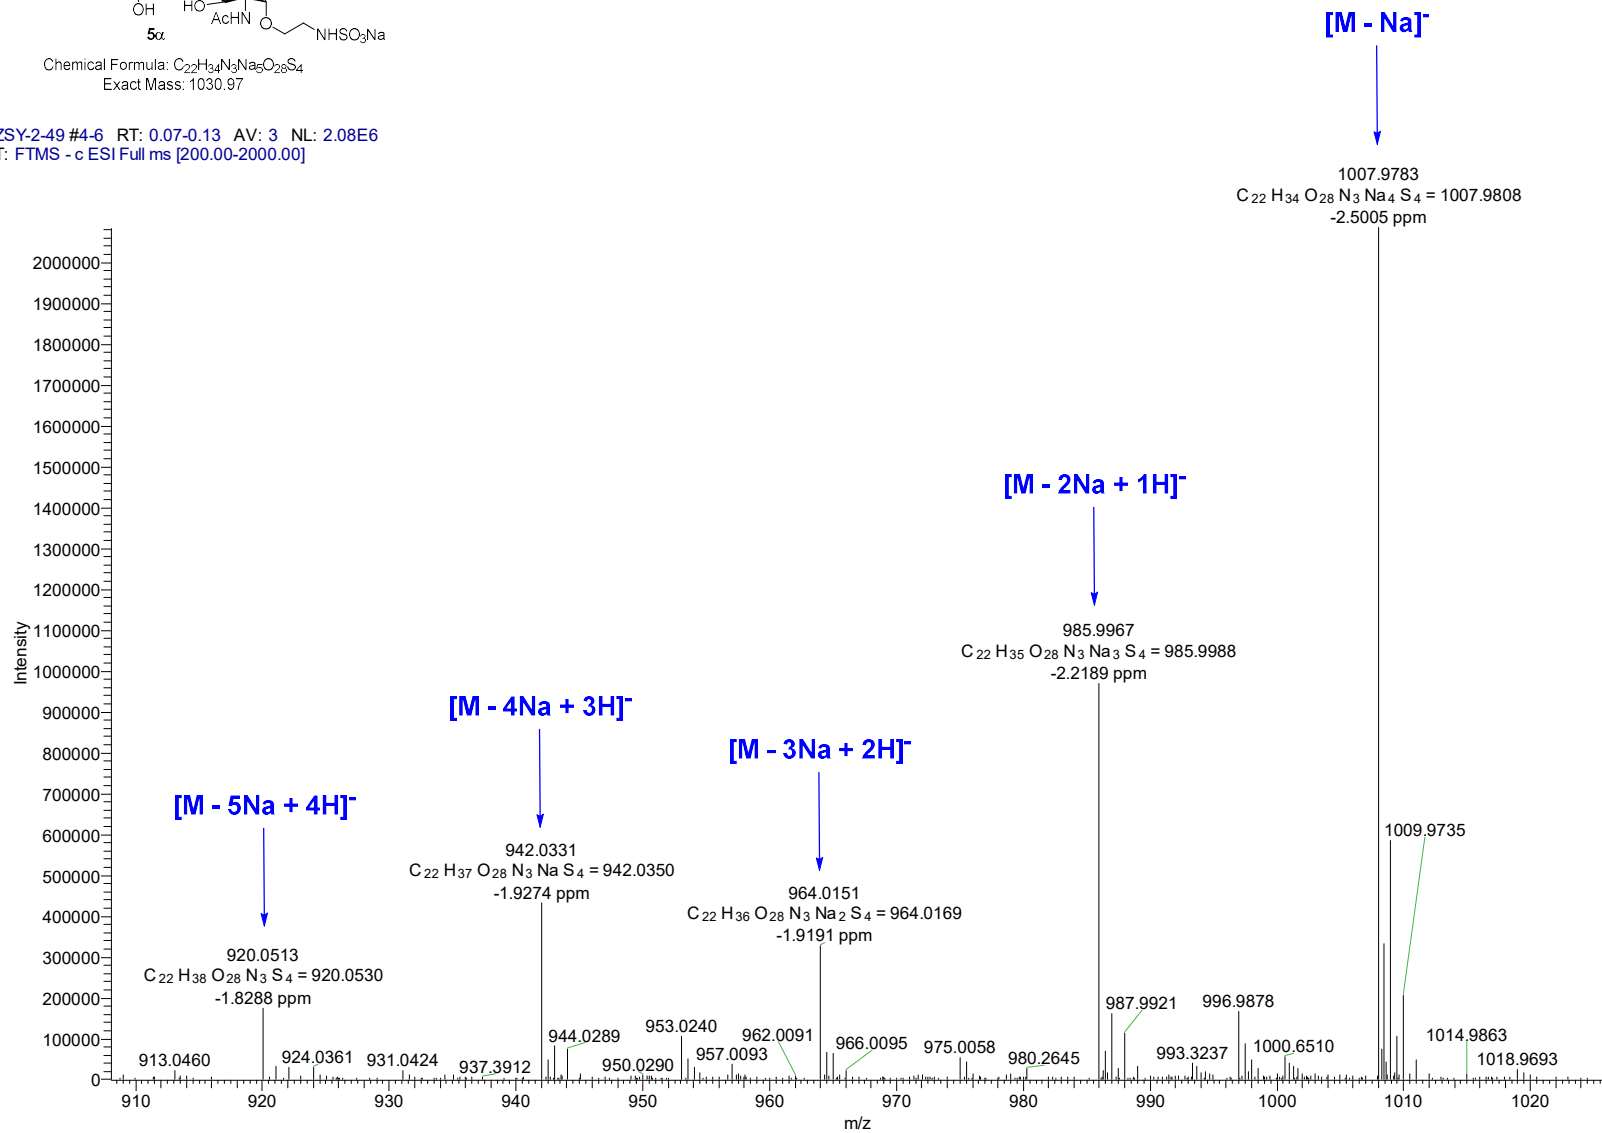

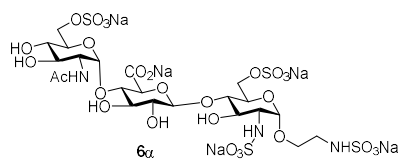

Chemical Formula: C<sub>22</sub>H<sub>34</sub>N<sub>3</sub>Na<sub>5</sub>O<sub>28</sub>S<sub>4</sub>  
 Exact Mass: 1030.97

ZSY-2-47 #3-23 RT: 0.04-0.65 AV: 21 NL: 6.05E5  
 T: FTMS - c ESI Full ms [200.00-2000.00]

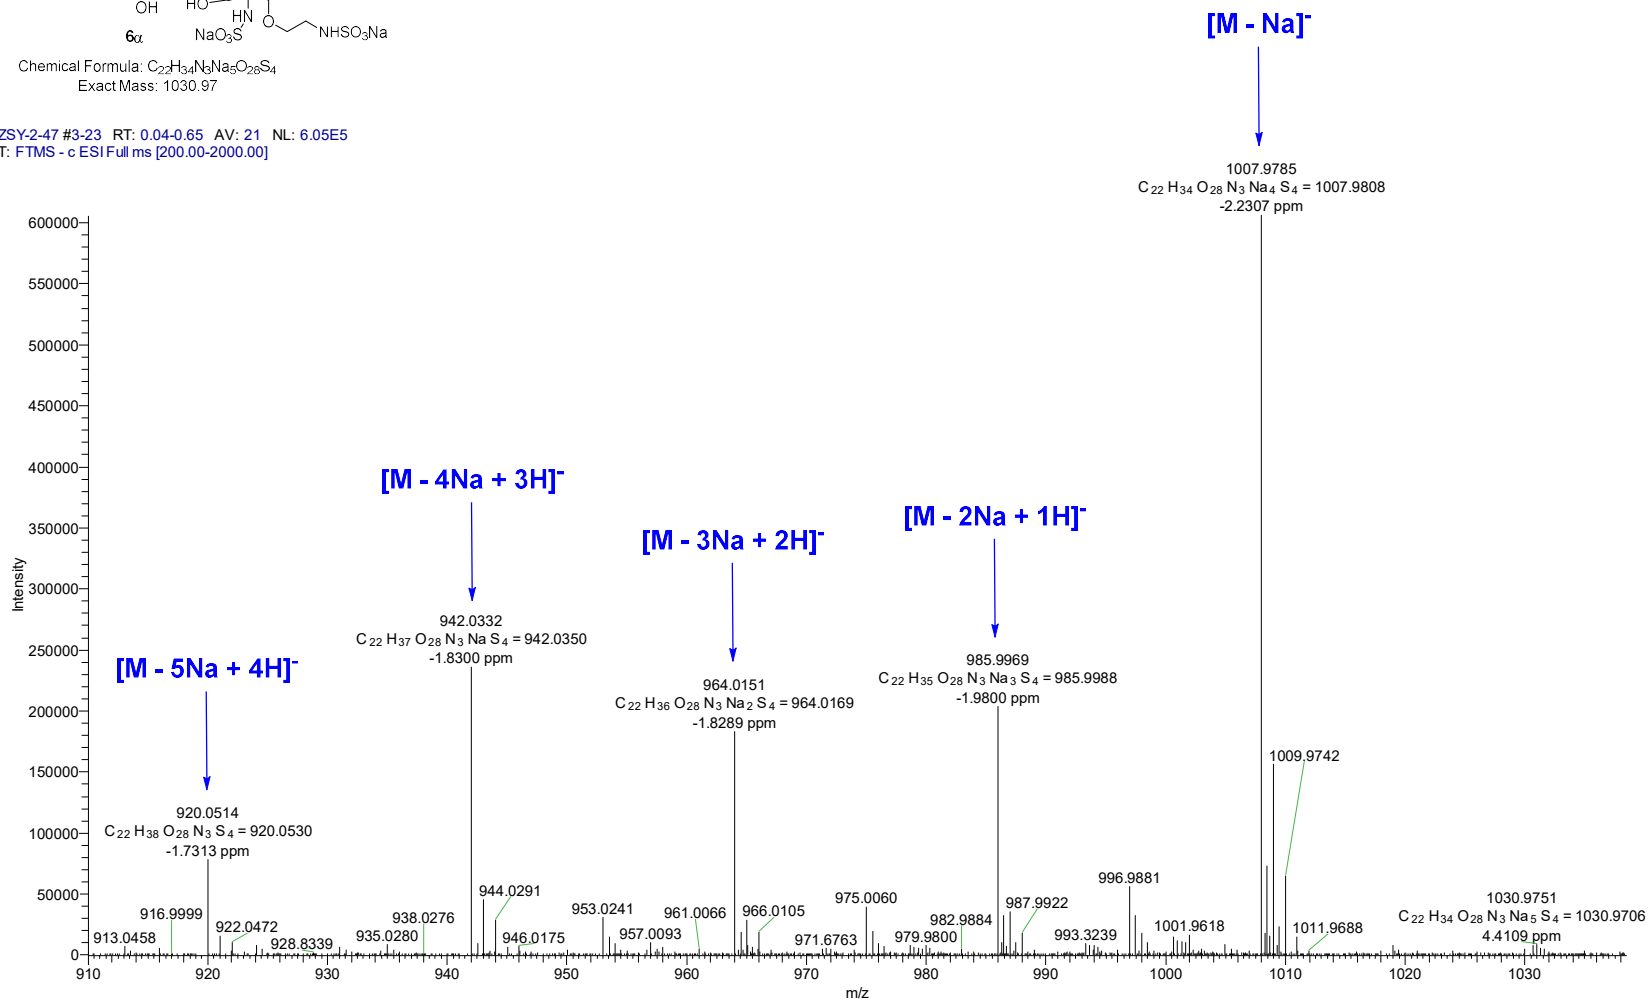

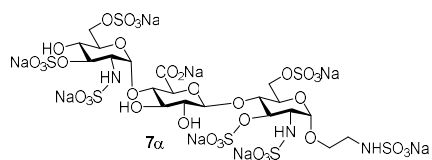

Chemical Formula: C<sub>20</sub>H<sub>29</sub>N<sub>3</sub>Na<sub>6</sub>O<sub>36</sub>S<sub>7</sub>  
 Exact Mass: 1294.78

ZSY-2-50 #4-15 RT: 0.07-0.40 AV: 12 NL: 8.37E5  
 T: FTMS - c ESI Full ms [200.00-2000.00]

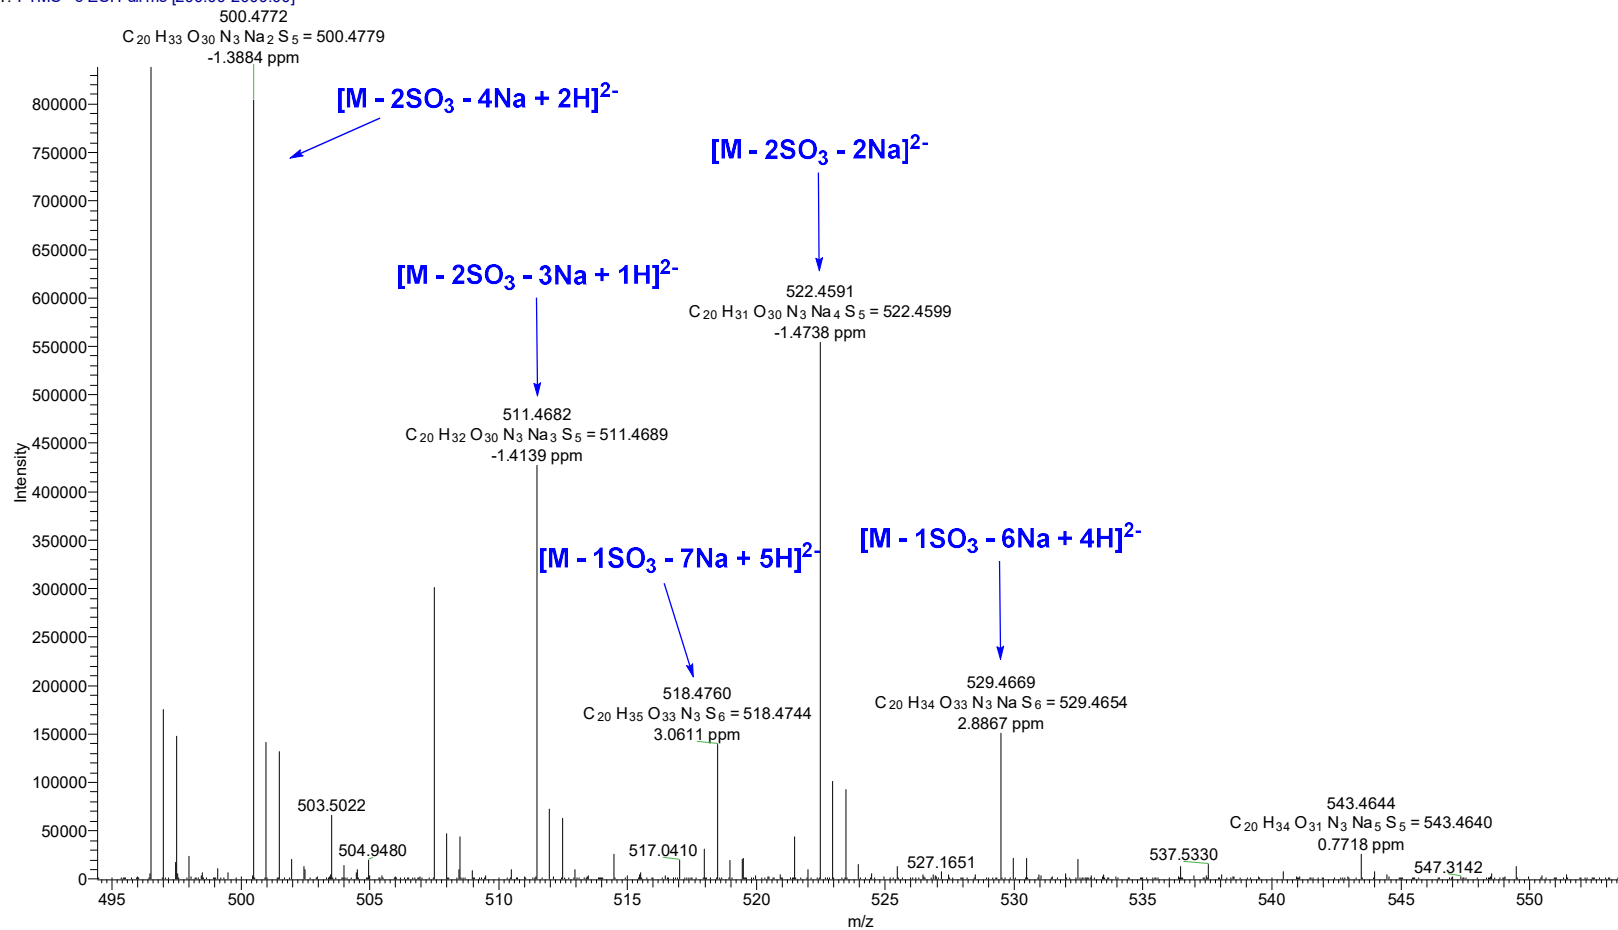

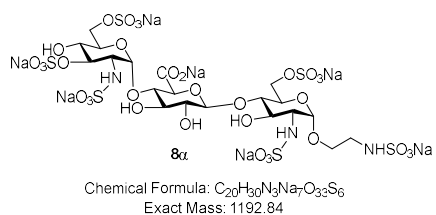

ZSY-2-51 #3-20 RT: 0.04-0.56 AV: 18 NL: 1.32E6  
T: FTMS - c ESI Full ms [200.00-2000.00]

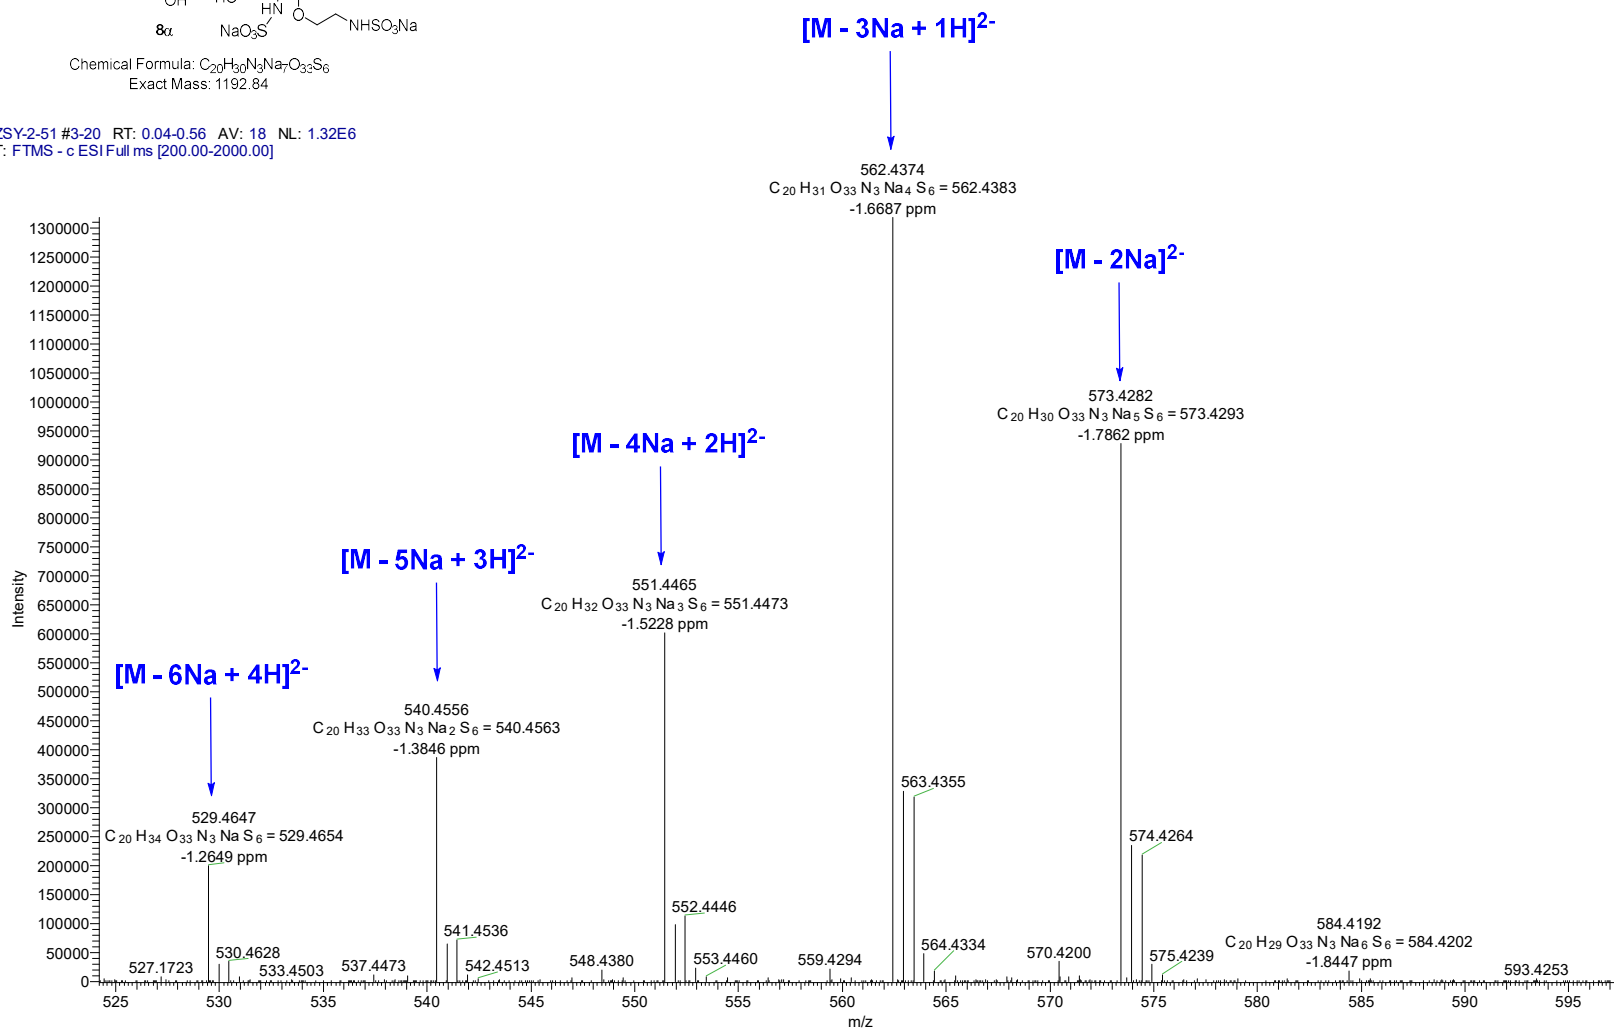

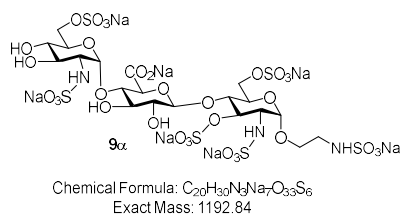

ZSY-2-52 #3-19 RT: 0.04-0.53 AV: 17 NL: 5.43E5  
T: FTMS - c ESI Full ms [200.00-2000.00]

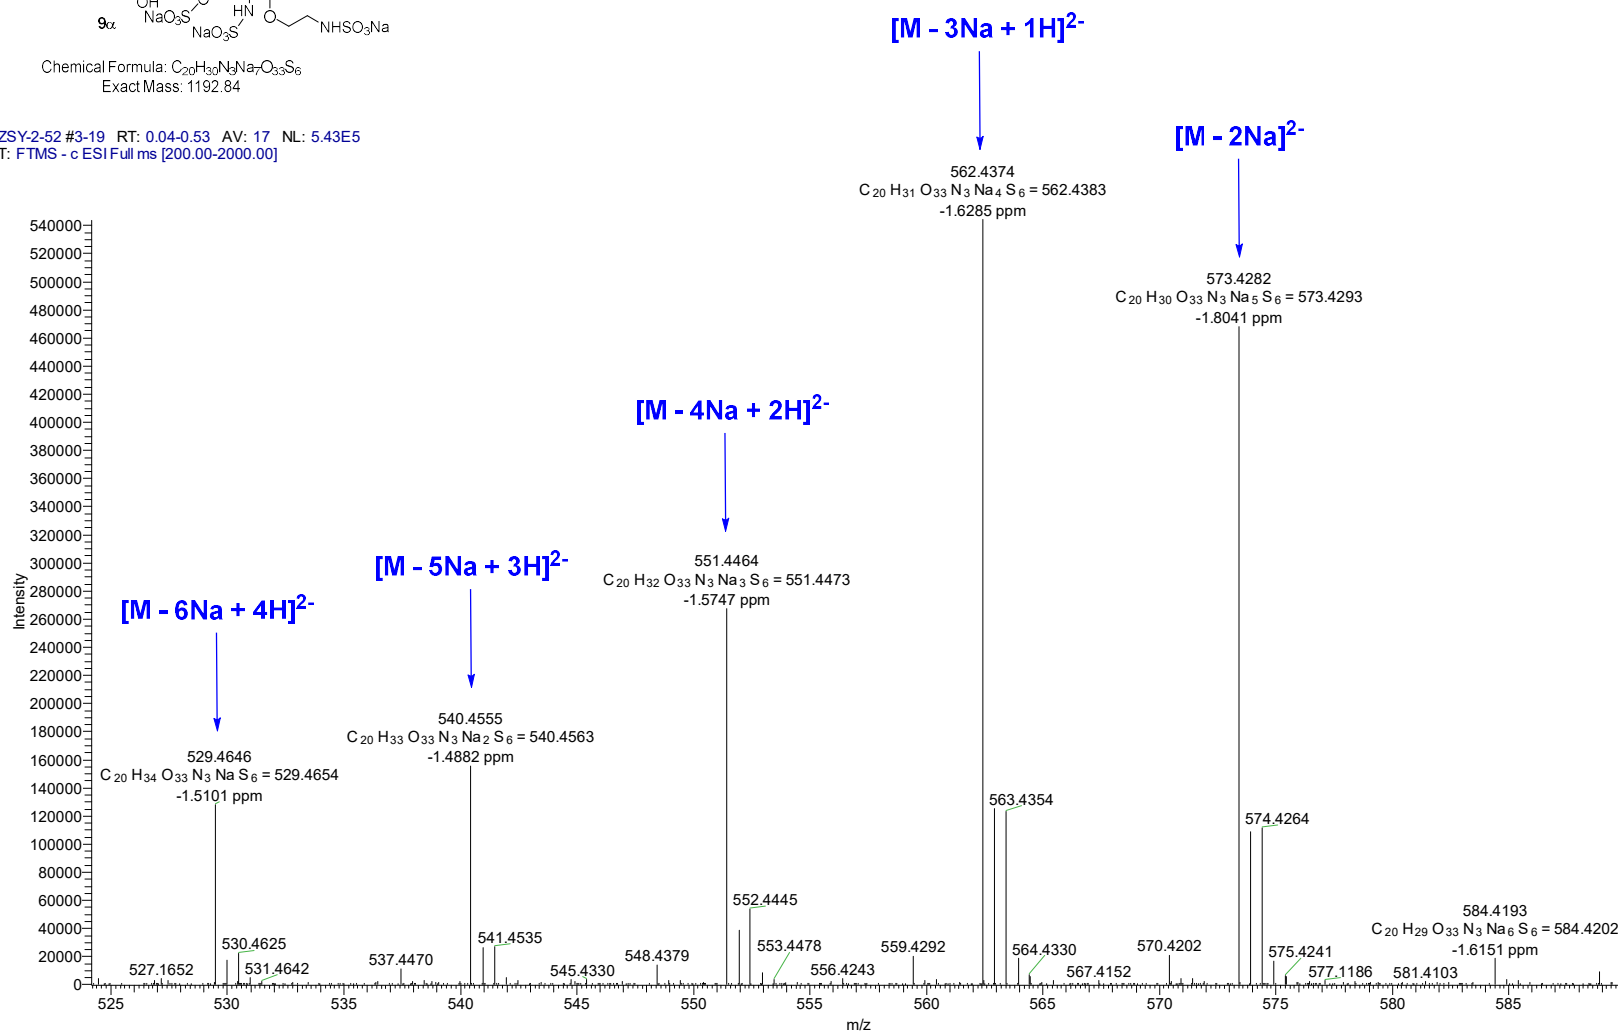



## 12. NMR Data

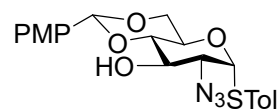

**11b**

<sup>1</sup>H NMR, 600 MHz, CDCl<sub>3</sub>

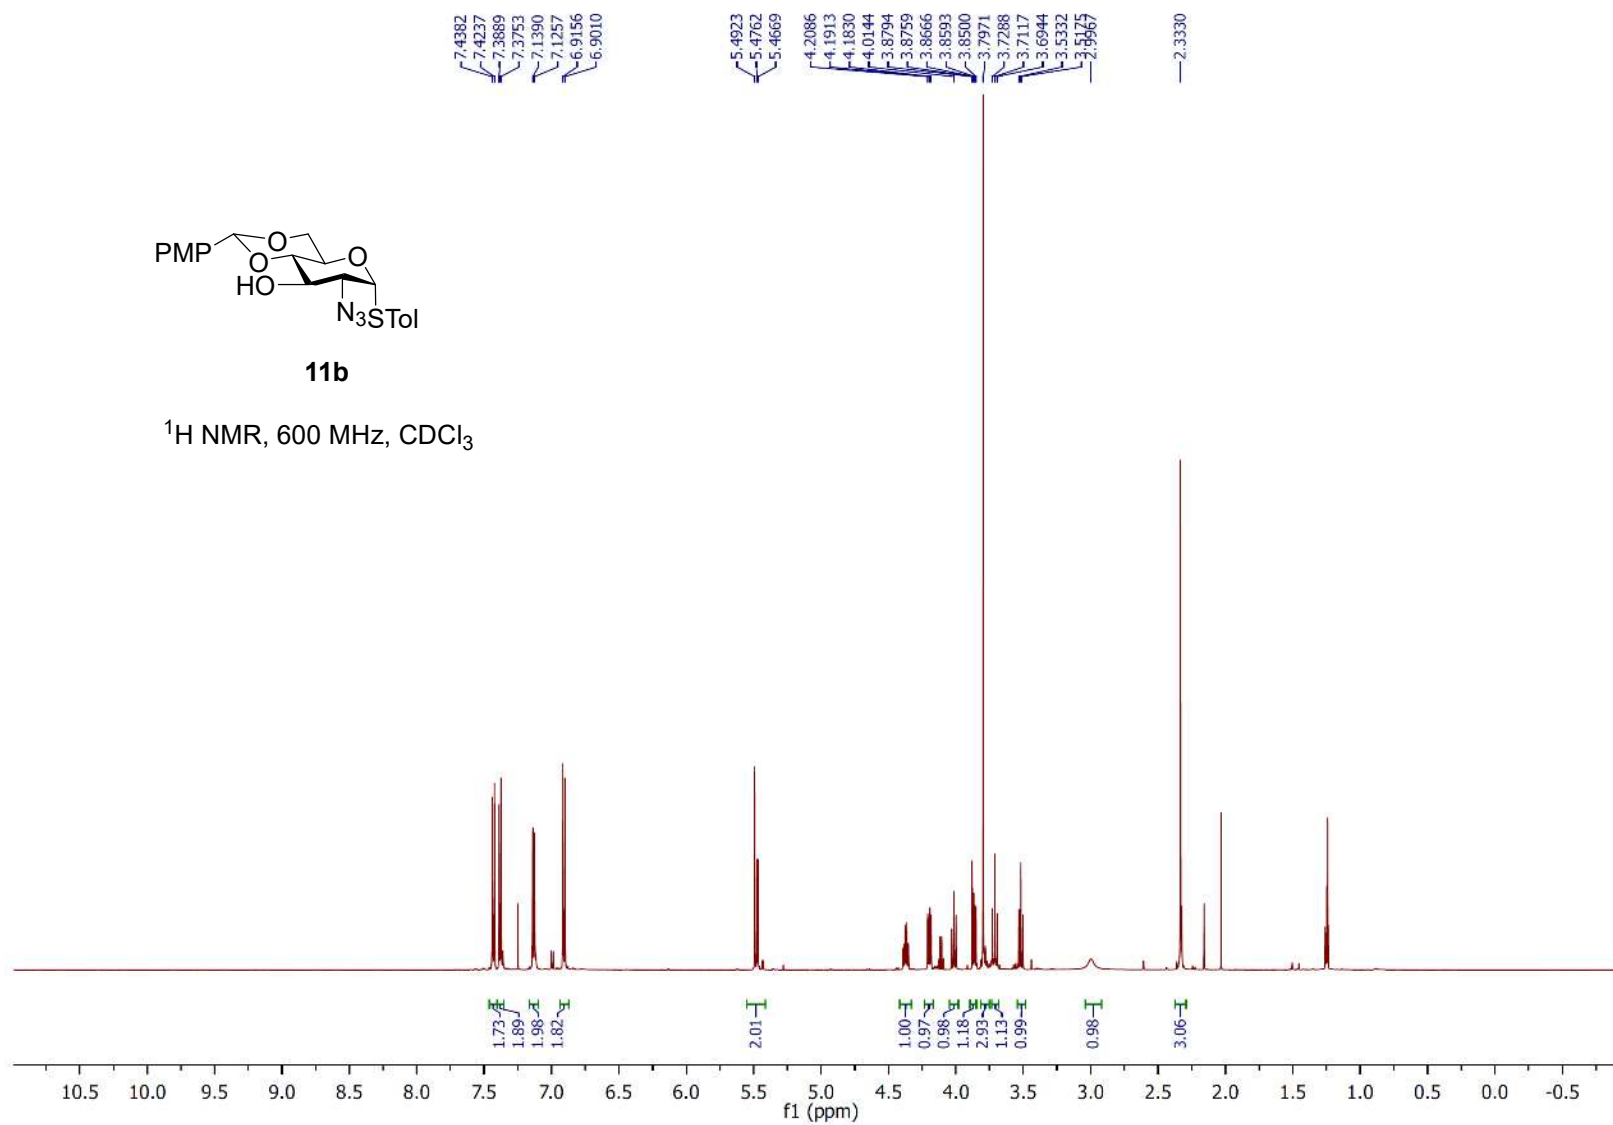

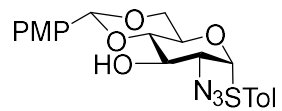

**11b**

$^{13}\text{C}$  NMR, 150 MHz,  $\text{CDCl}_3$

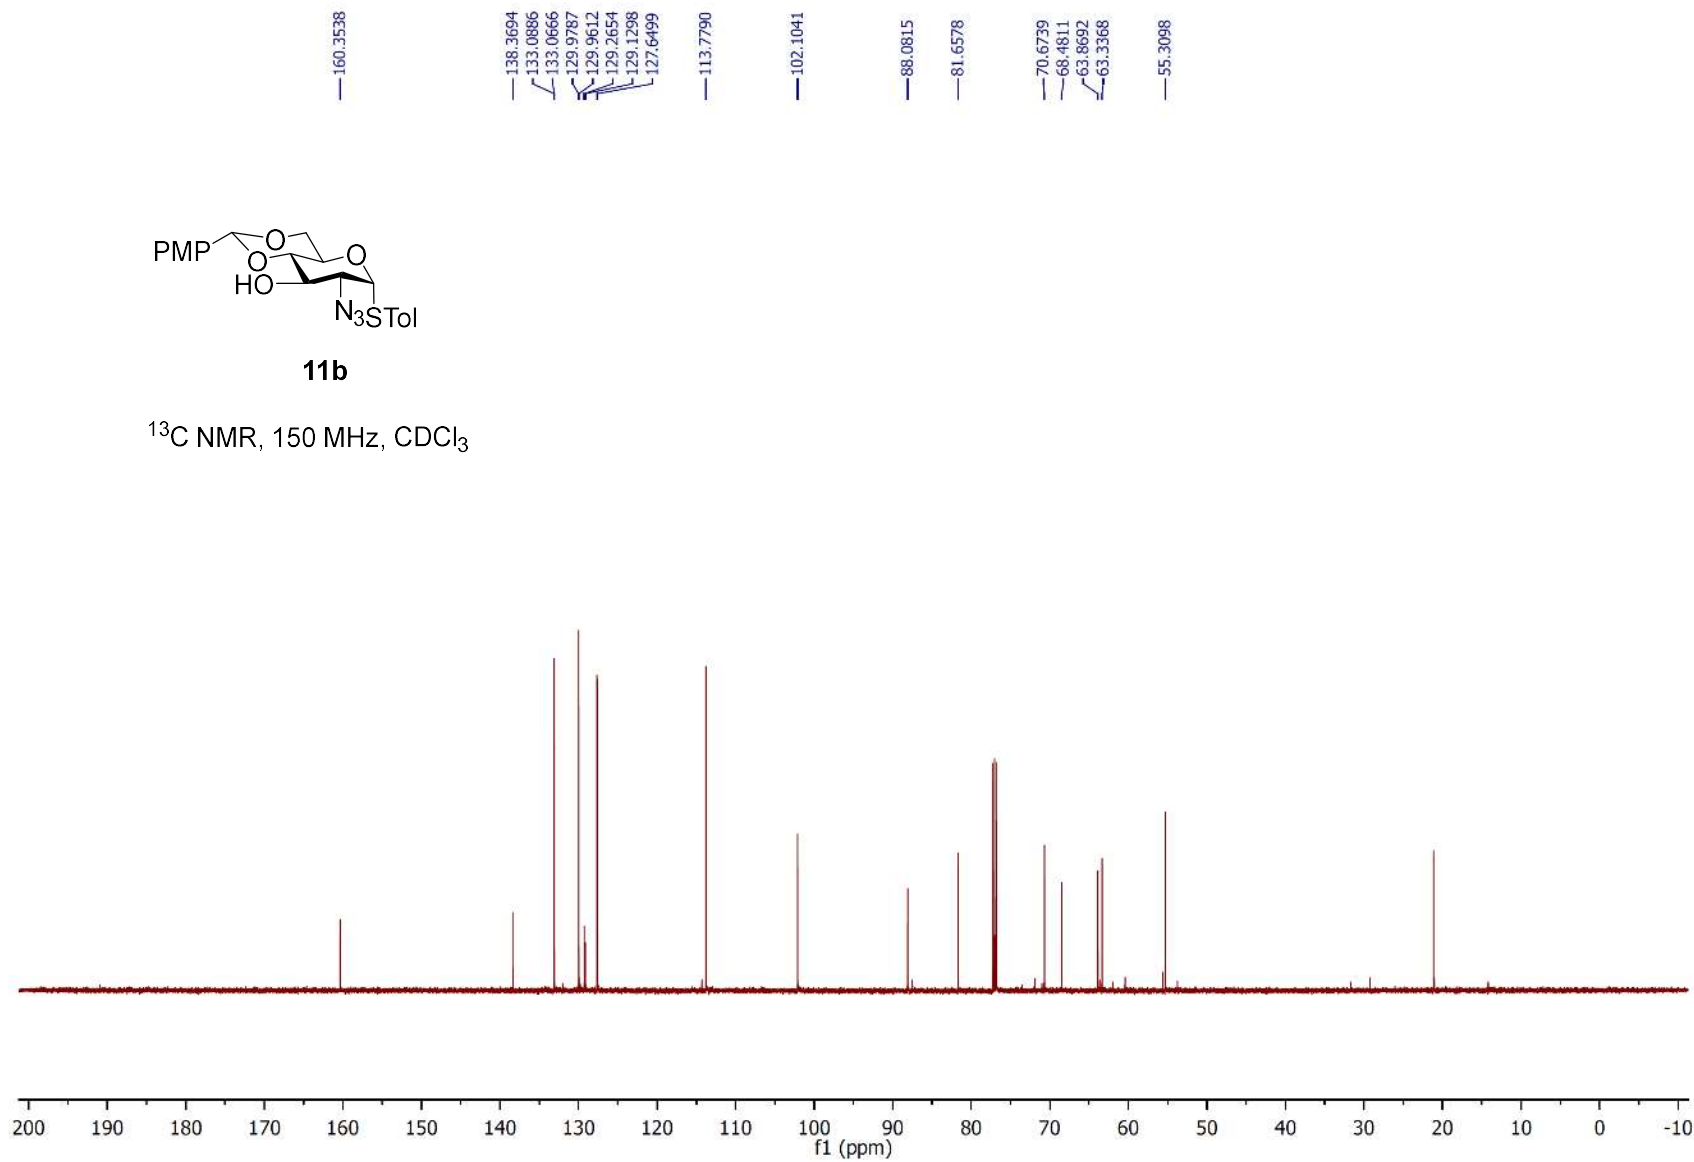

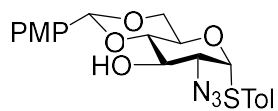

**11b**

coupled  $^{13}\text{C}$  NMR, 150 MHz,  $\text{CDCl}_3$

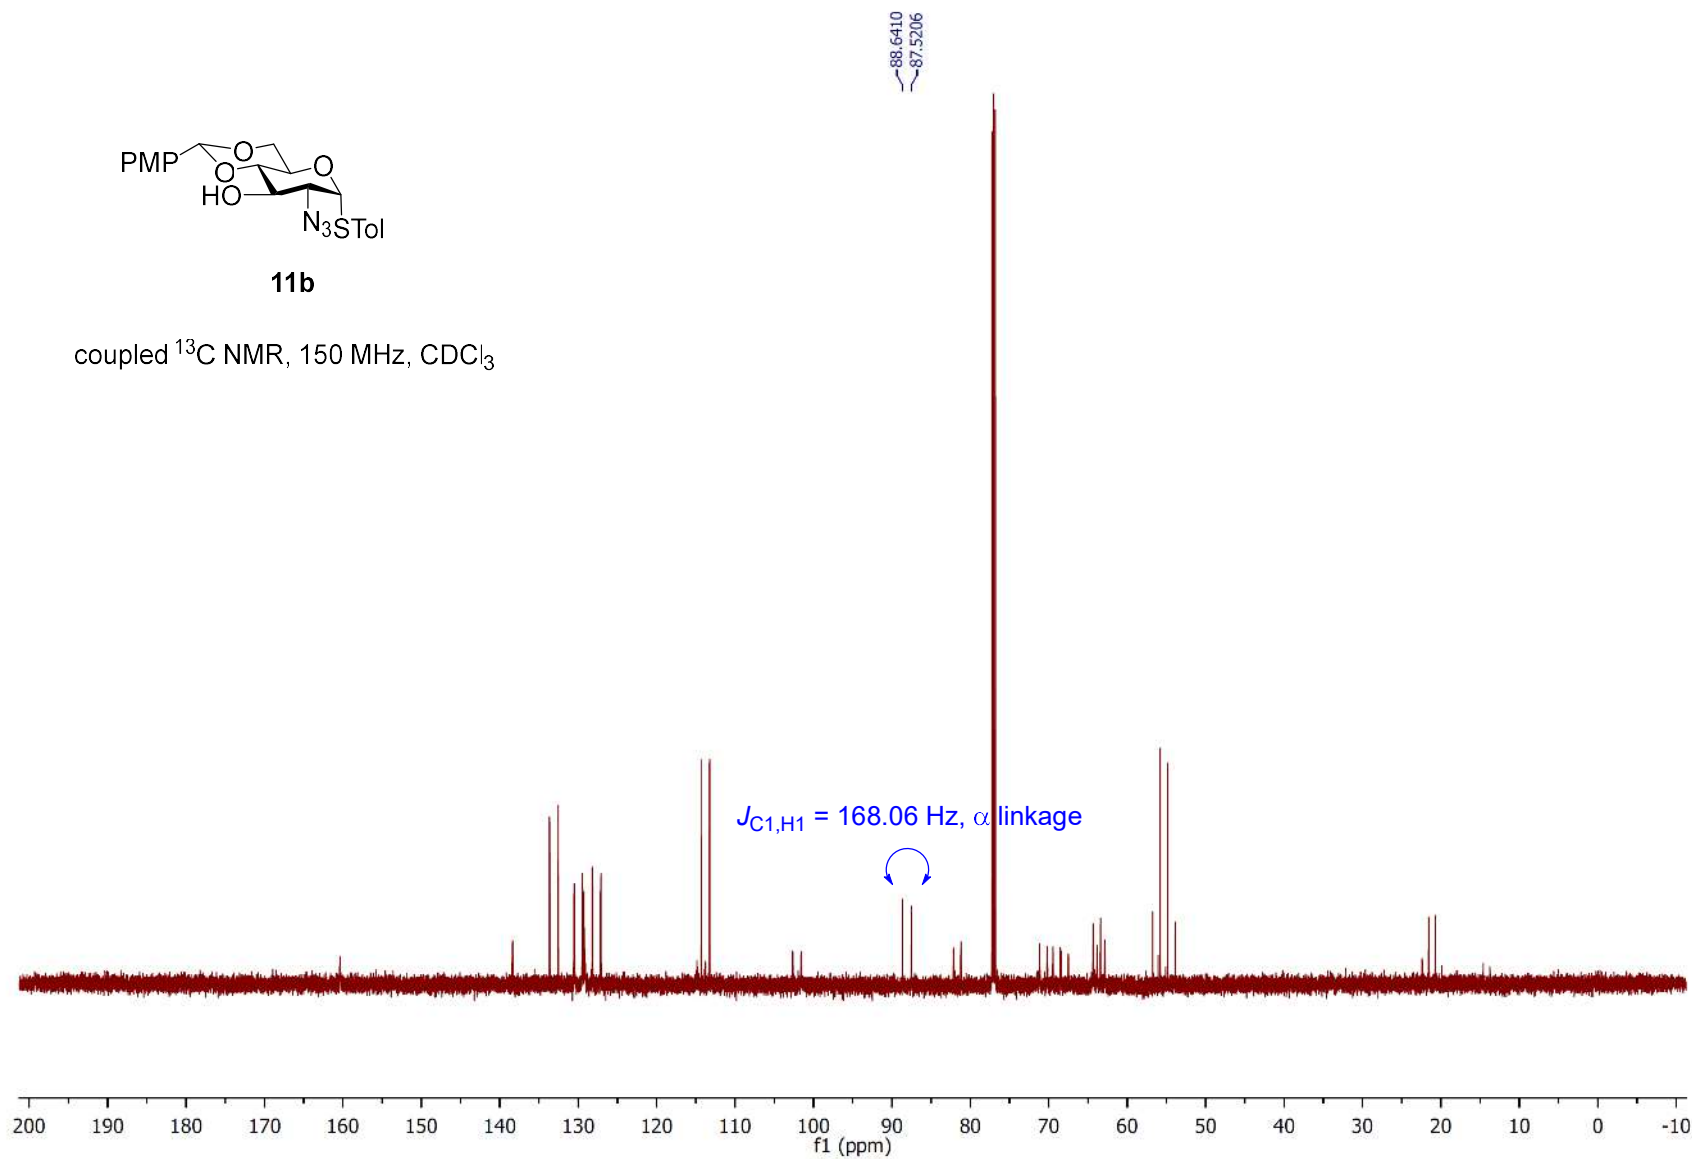

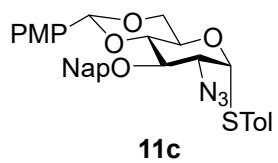

<sup>1</sup>H NMR, 600 MHz, CDCl<sub>3</sub>

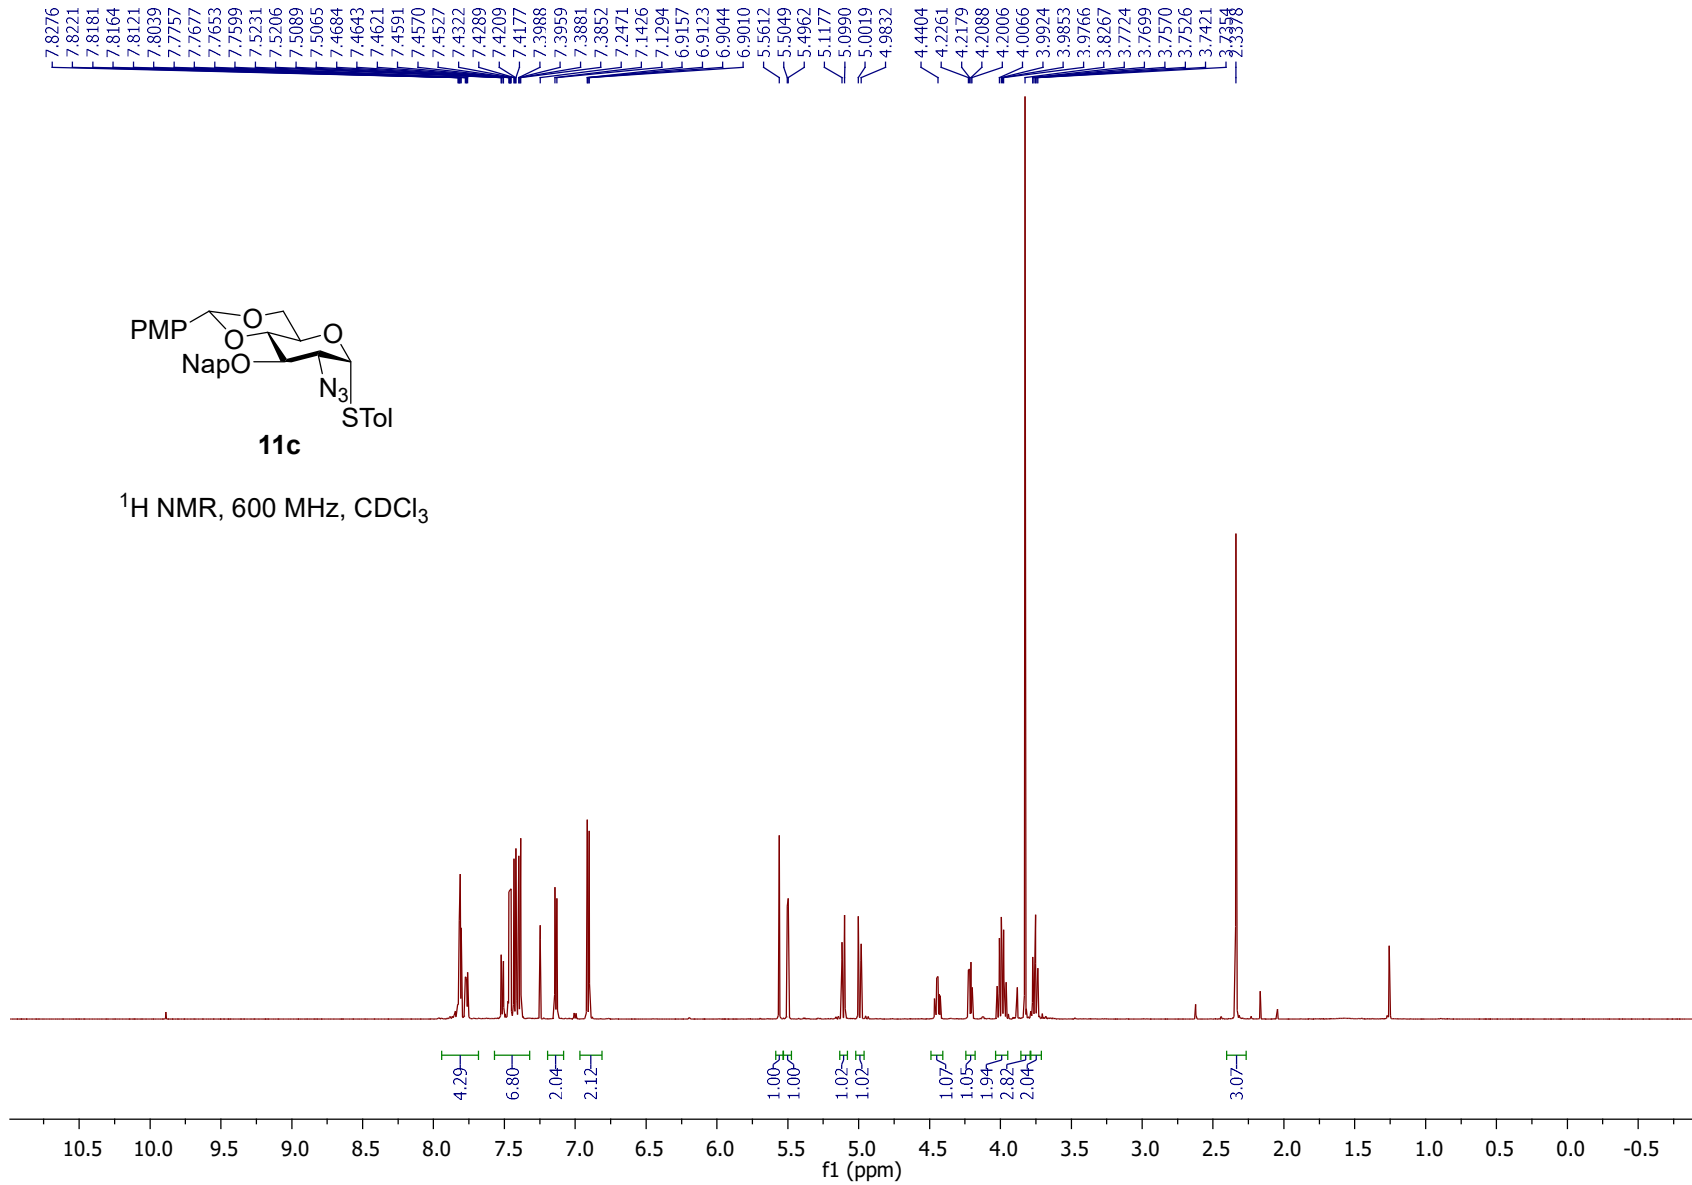

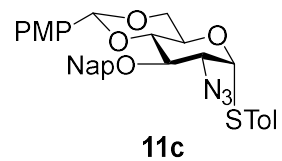

$^{13}\text{C}$  NMR, 150 MHz,  $\text{CDCl}_3$

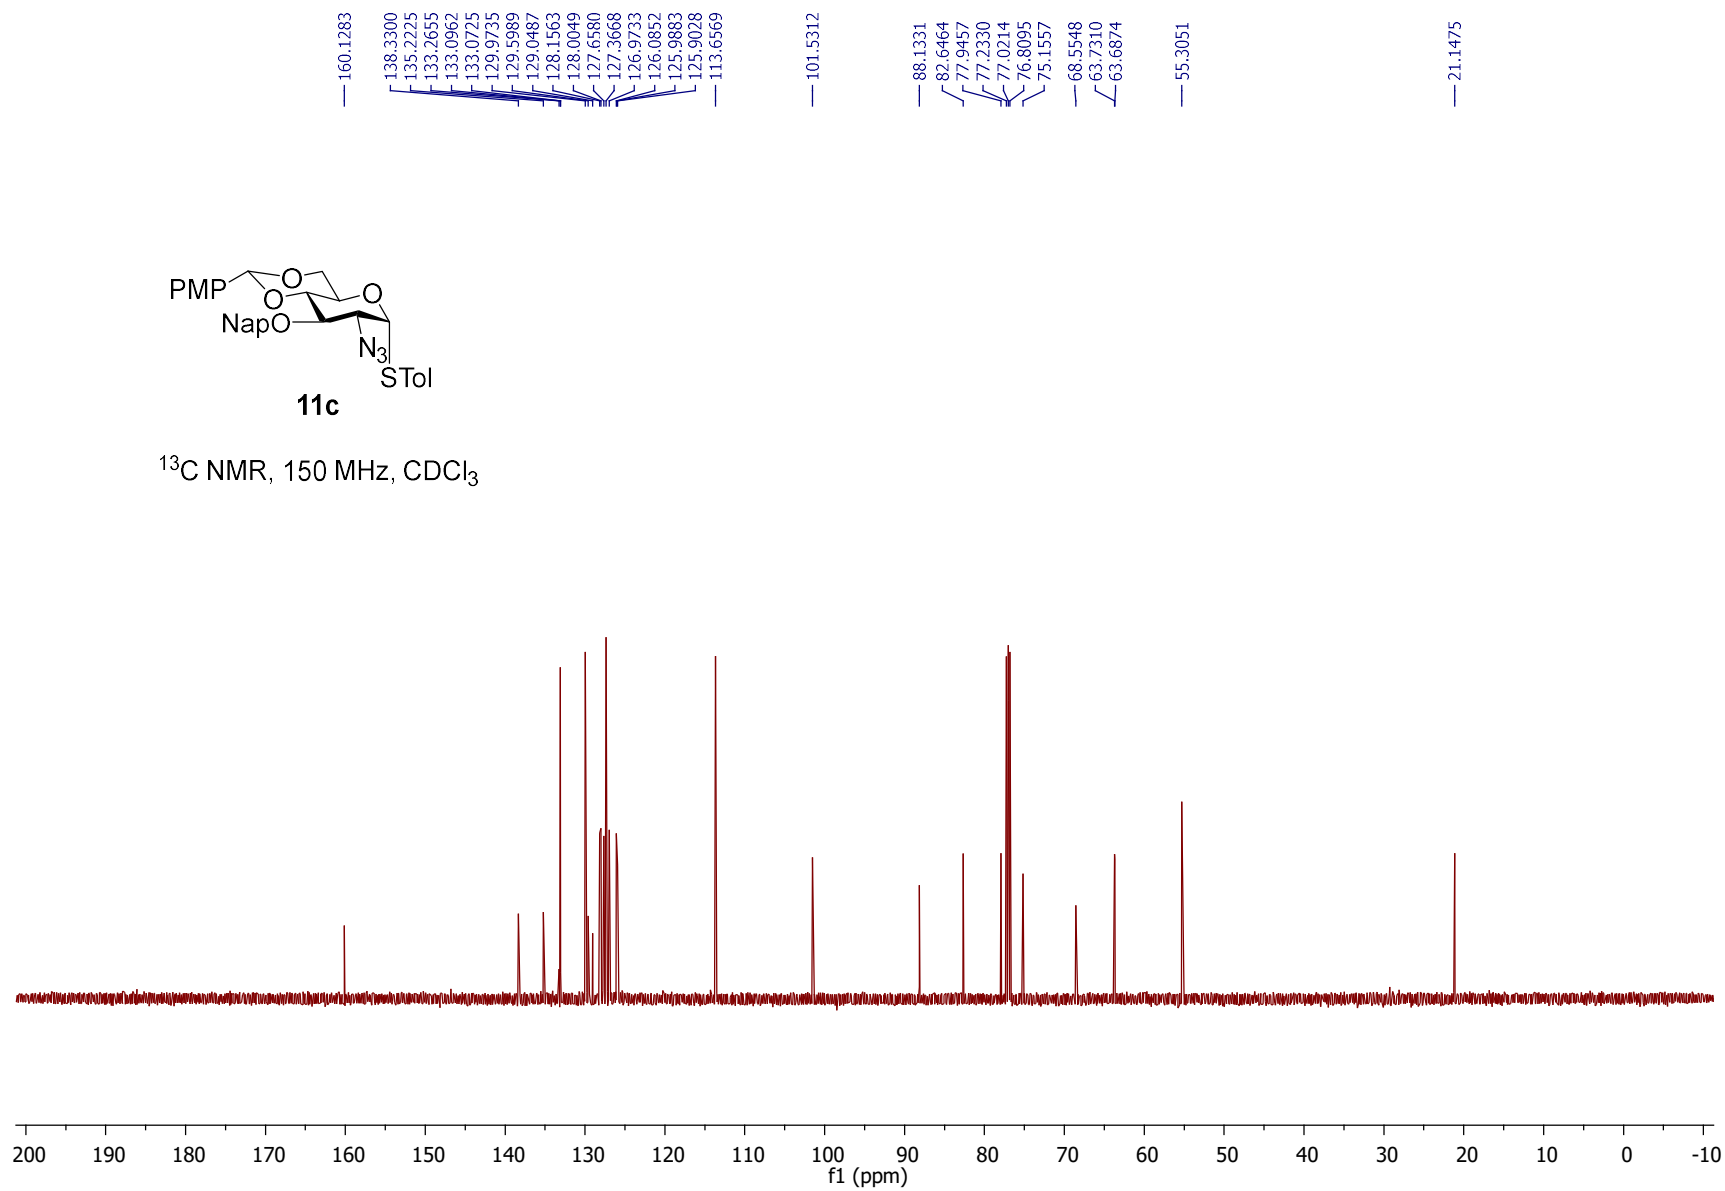

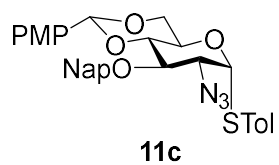

$^1\text{H}$ - $^{13}\text{C}$  HSQC, 600/150MHz,  $\text{CDCl}_3$

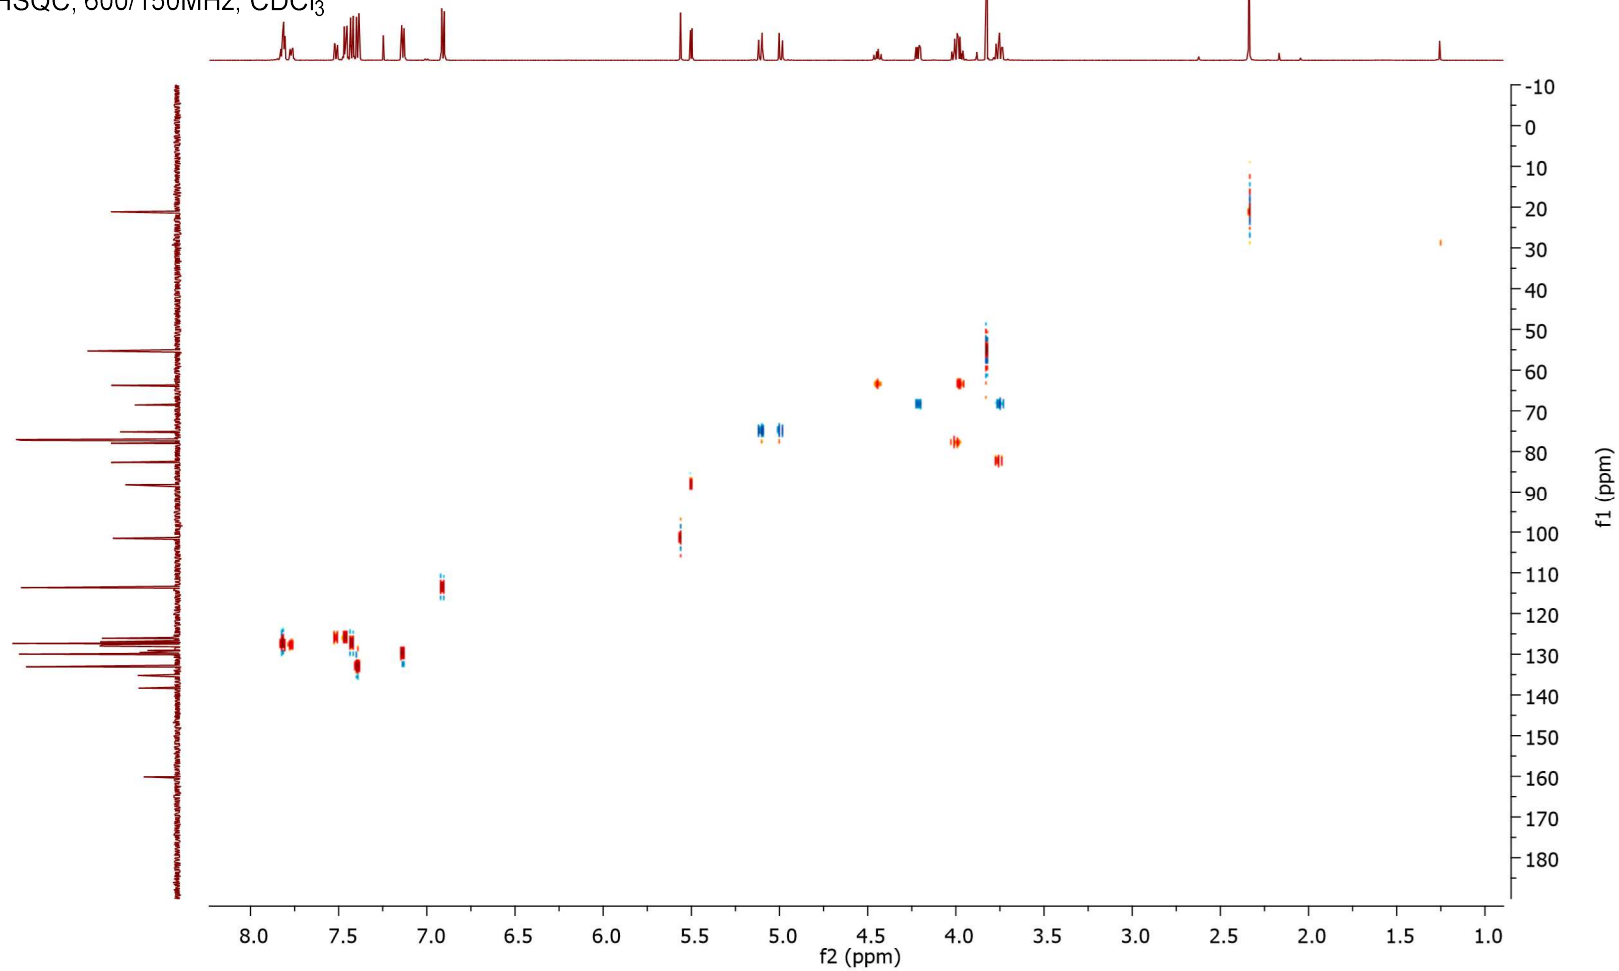

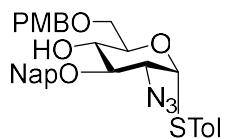

**11d**

$^1\text{H}$  NMR, 600 MHz,  $\text{CDCl}_3$

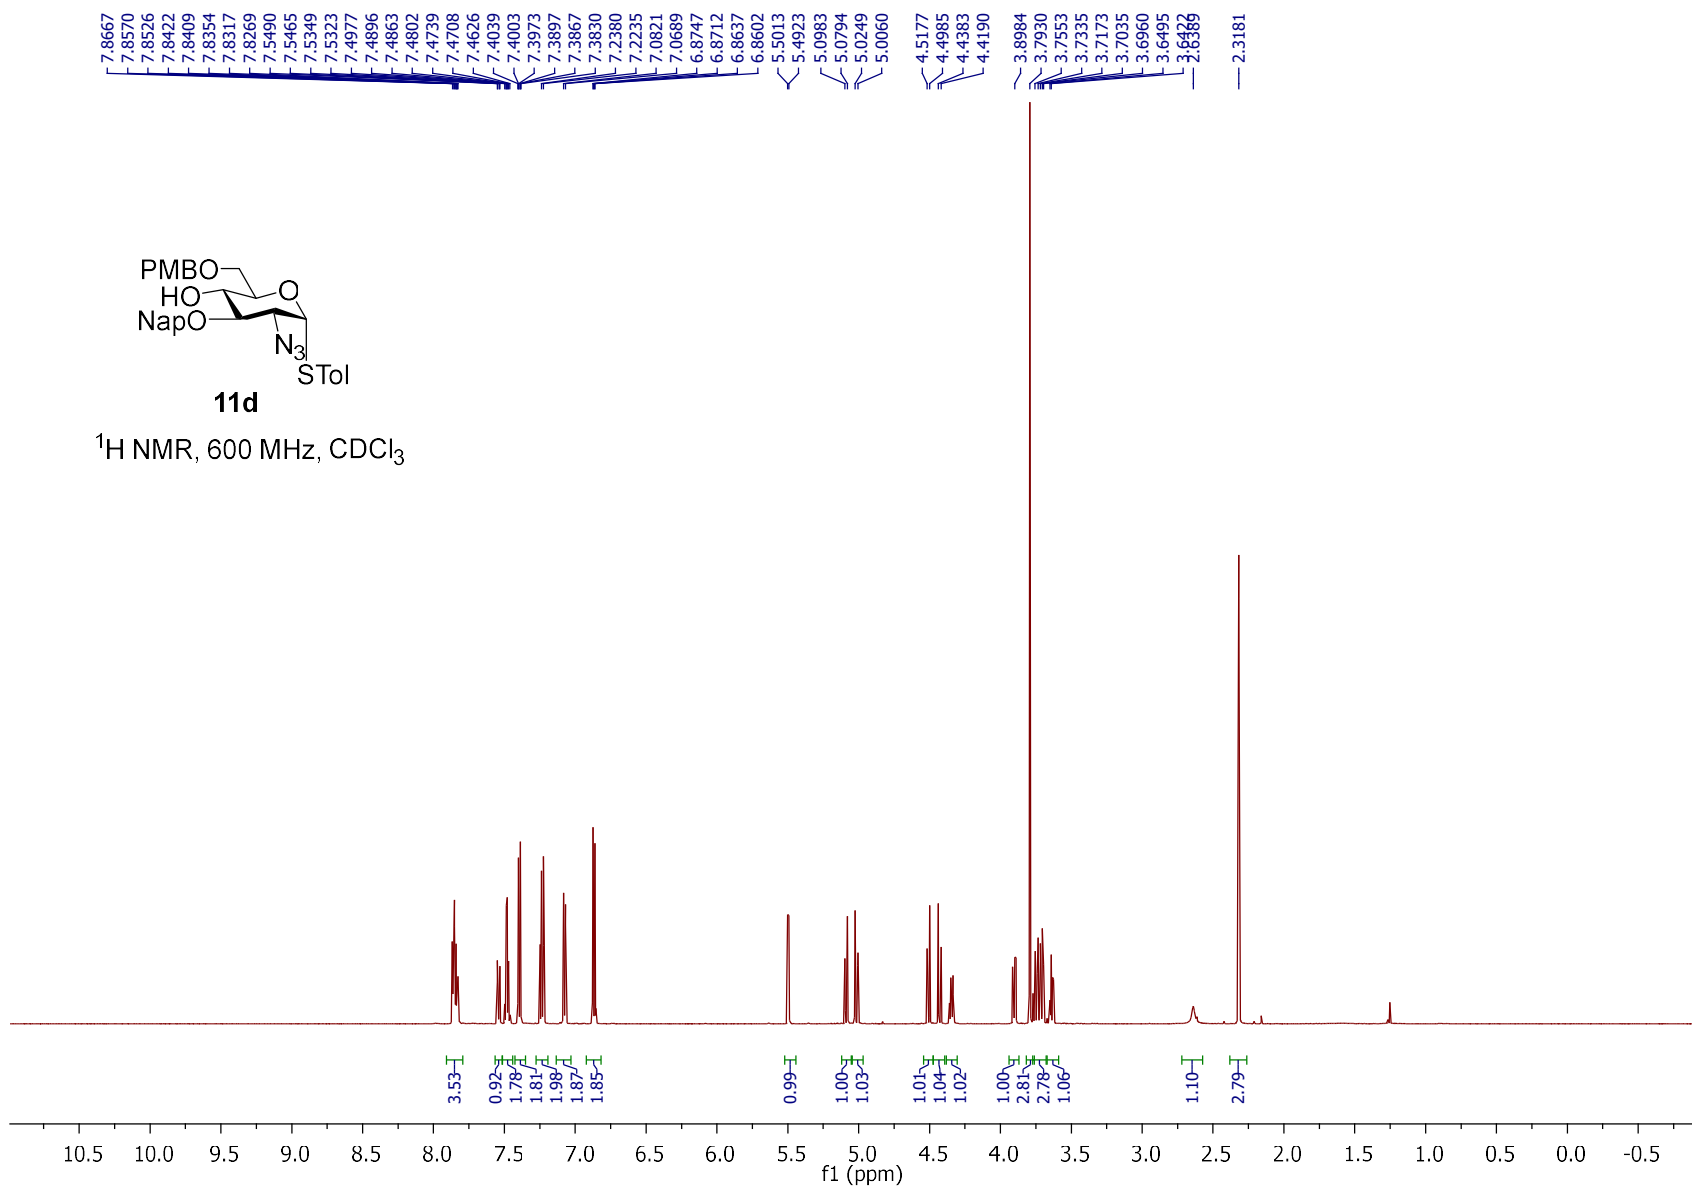

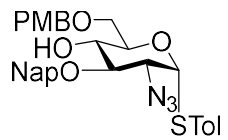

**11d**

<sup>13</sup>C NMR, 150 MHz, CDCl<sub>3</sub>

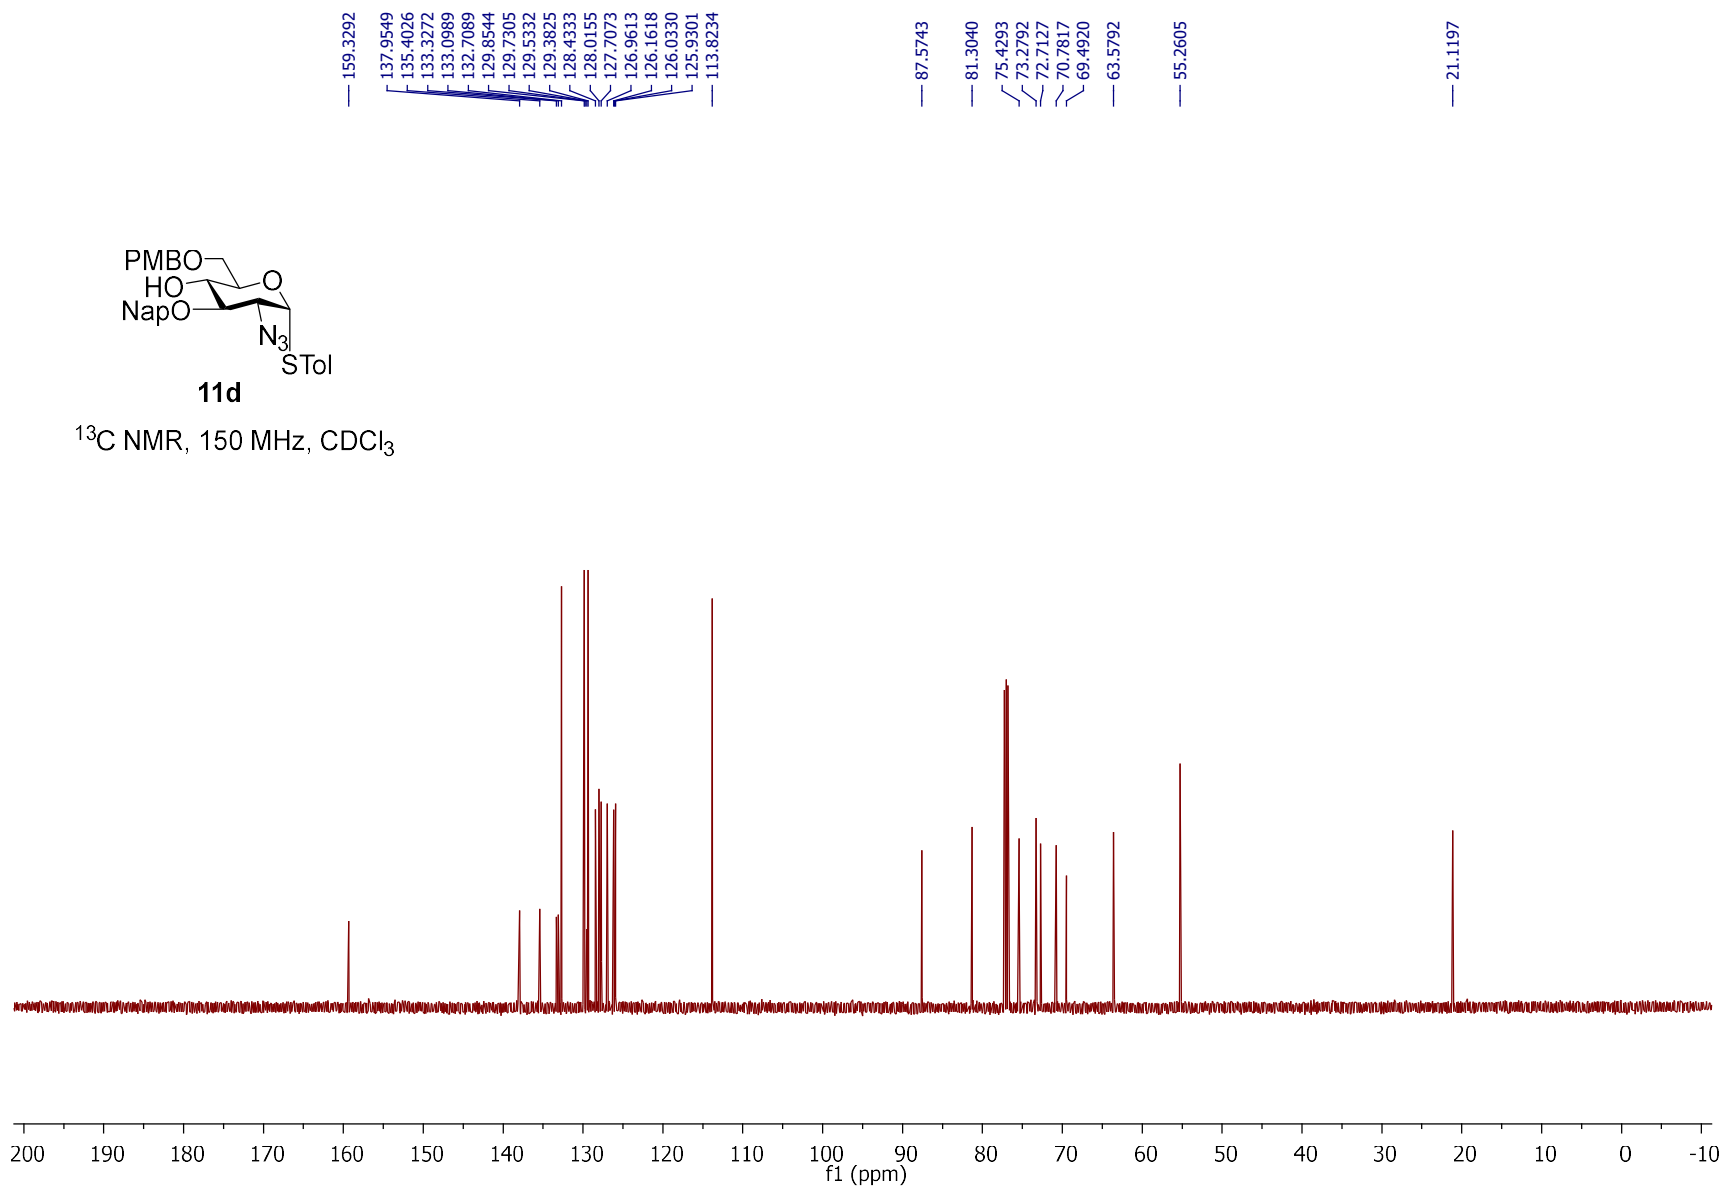



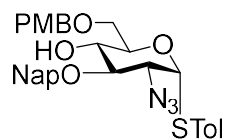

**11d**

coupled  $^{13}\text{C}$  NMR, 150 MHz,  $\text{CDCl}_3$

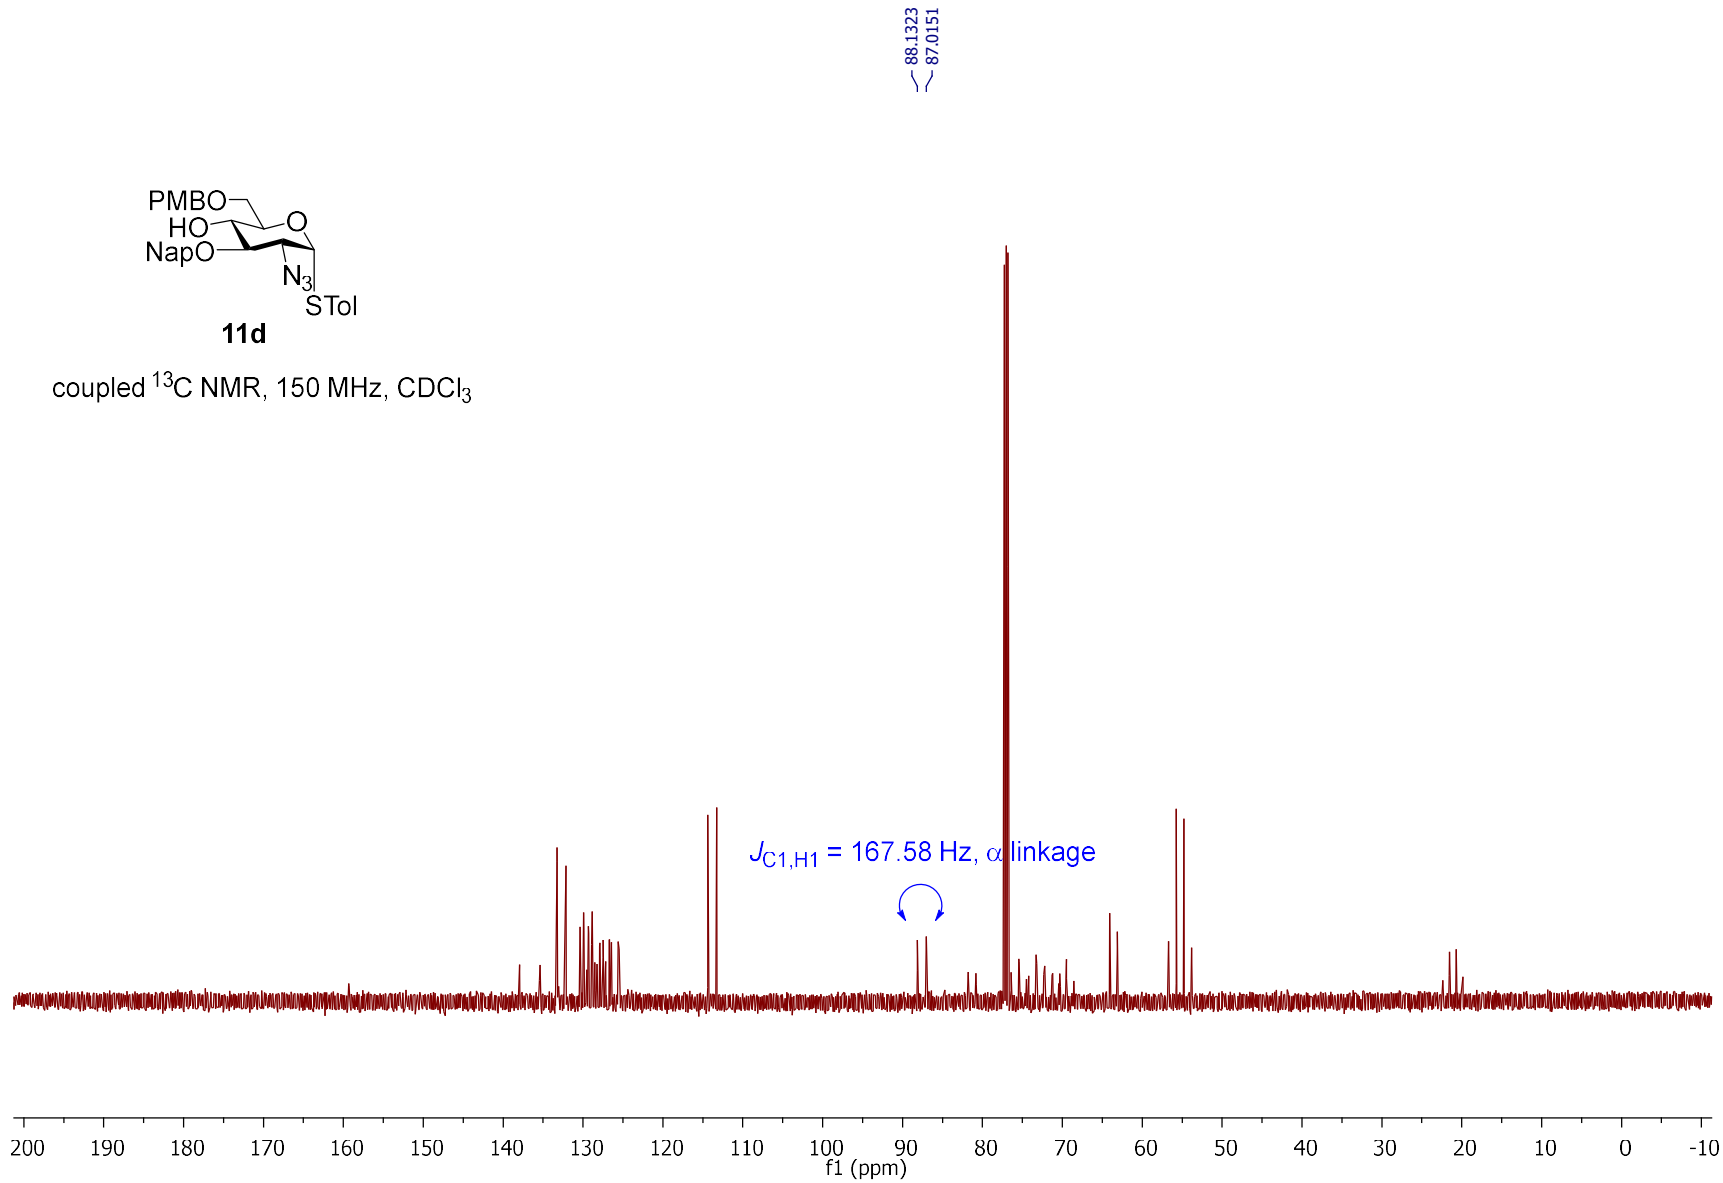

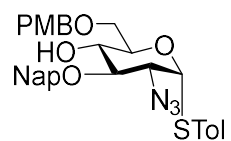

11d

<sup>1</sup>H-<sup>1</sup>H COSY, 600 MHz, CDCl<sub>3</sub>

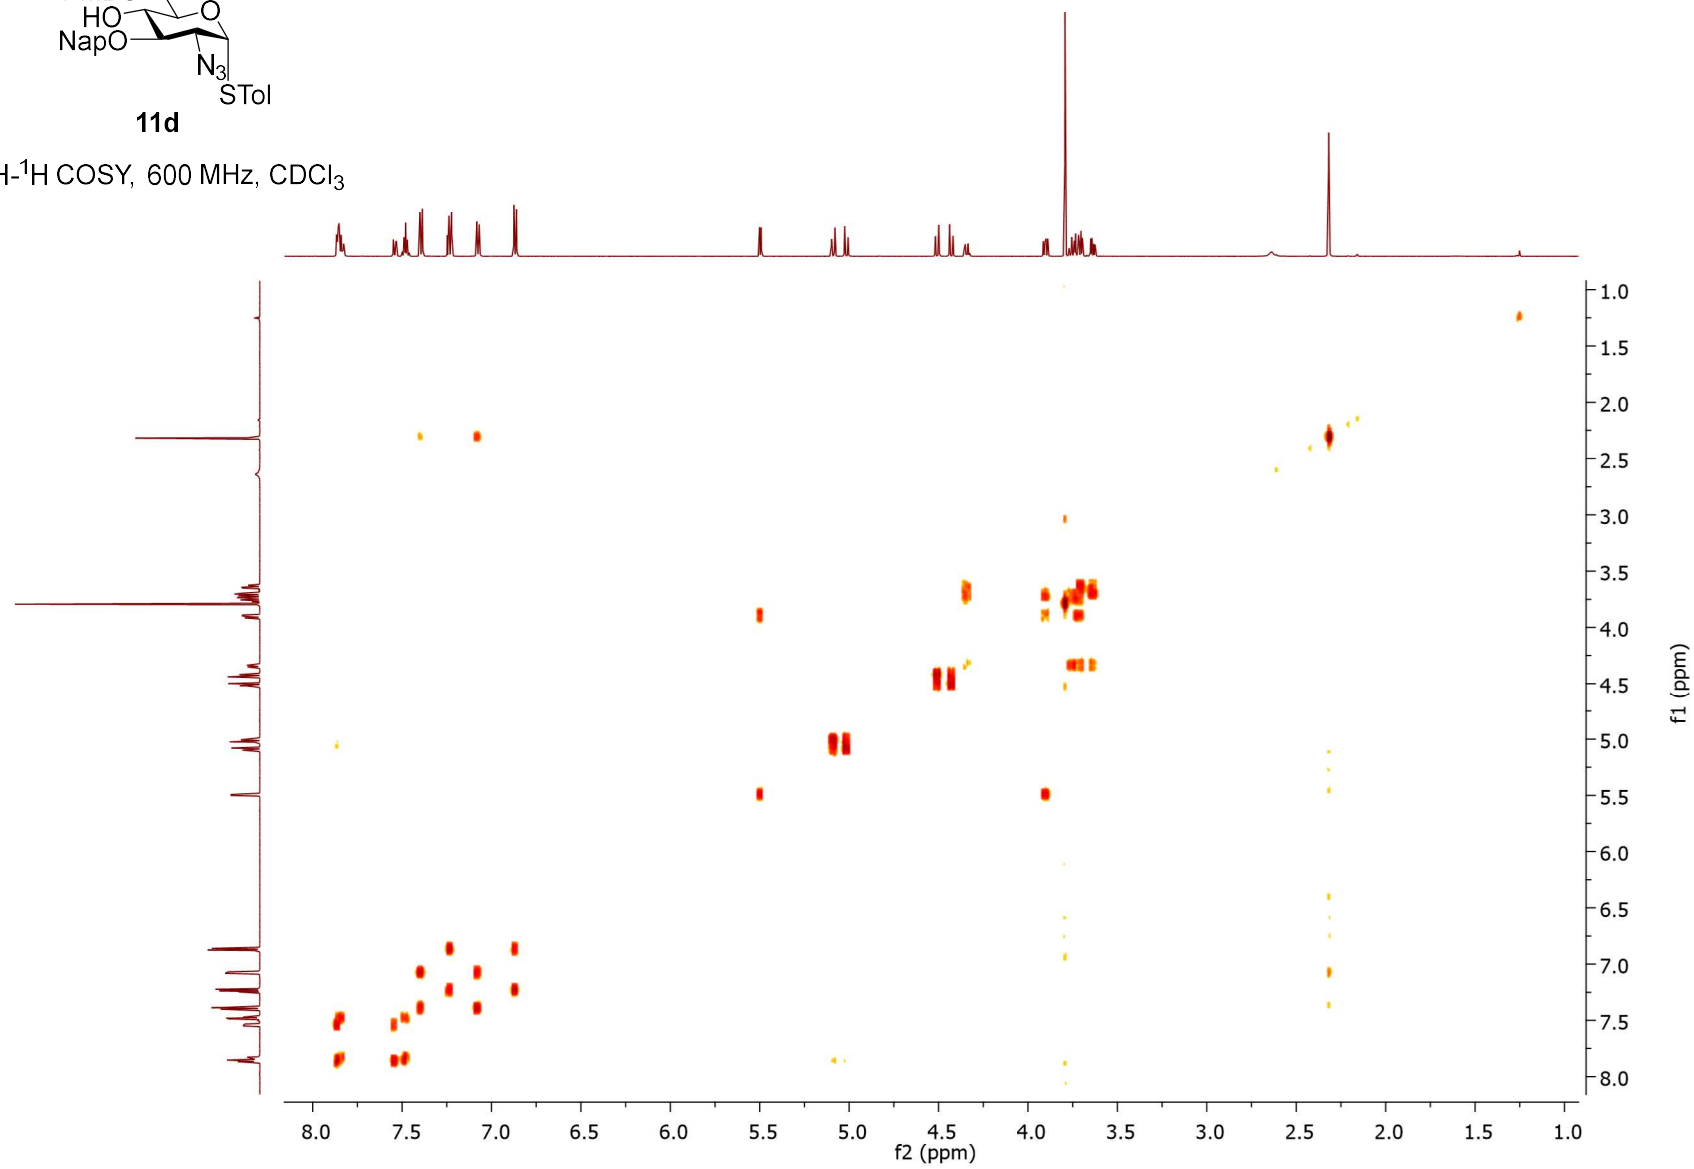

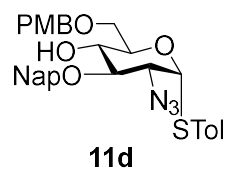

$^1\text{H}$ - $^{13}\text{C}$  HSQC, 600/150MHz,  $\text{CDCl}_3$

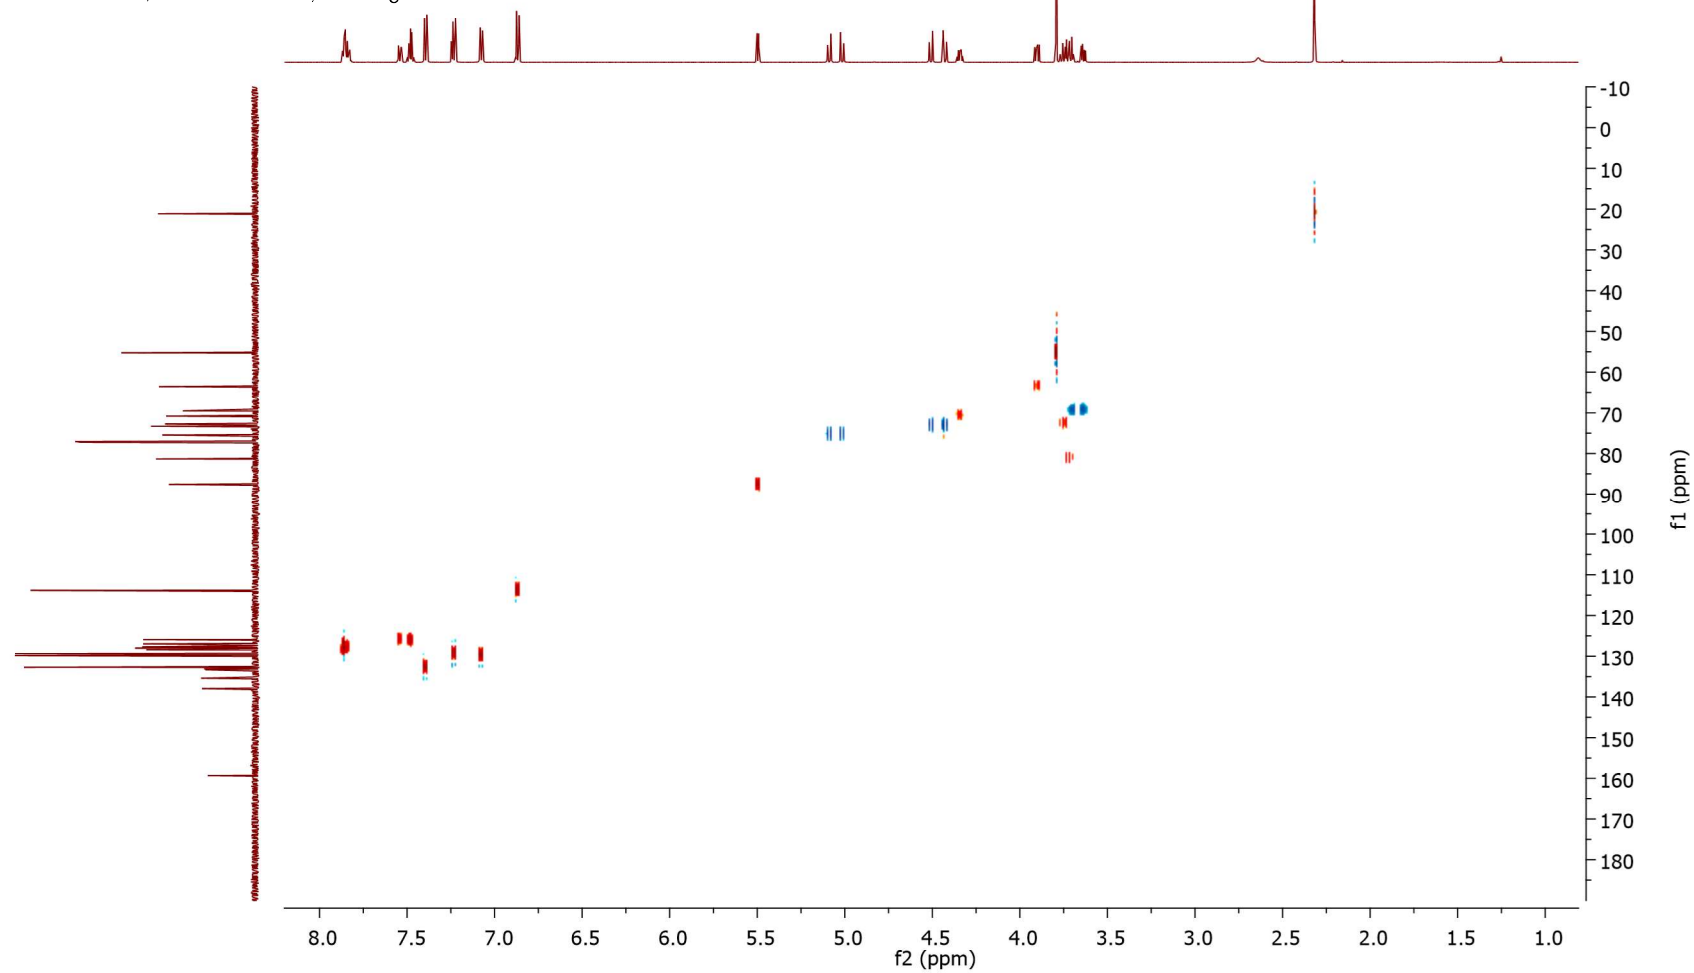

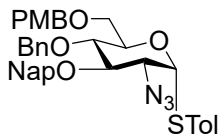

**11**

<sup>1</sup>H NMR, 600 MHz, CDCl<sub>3</sub>

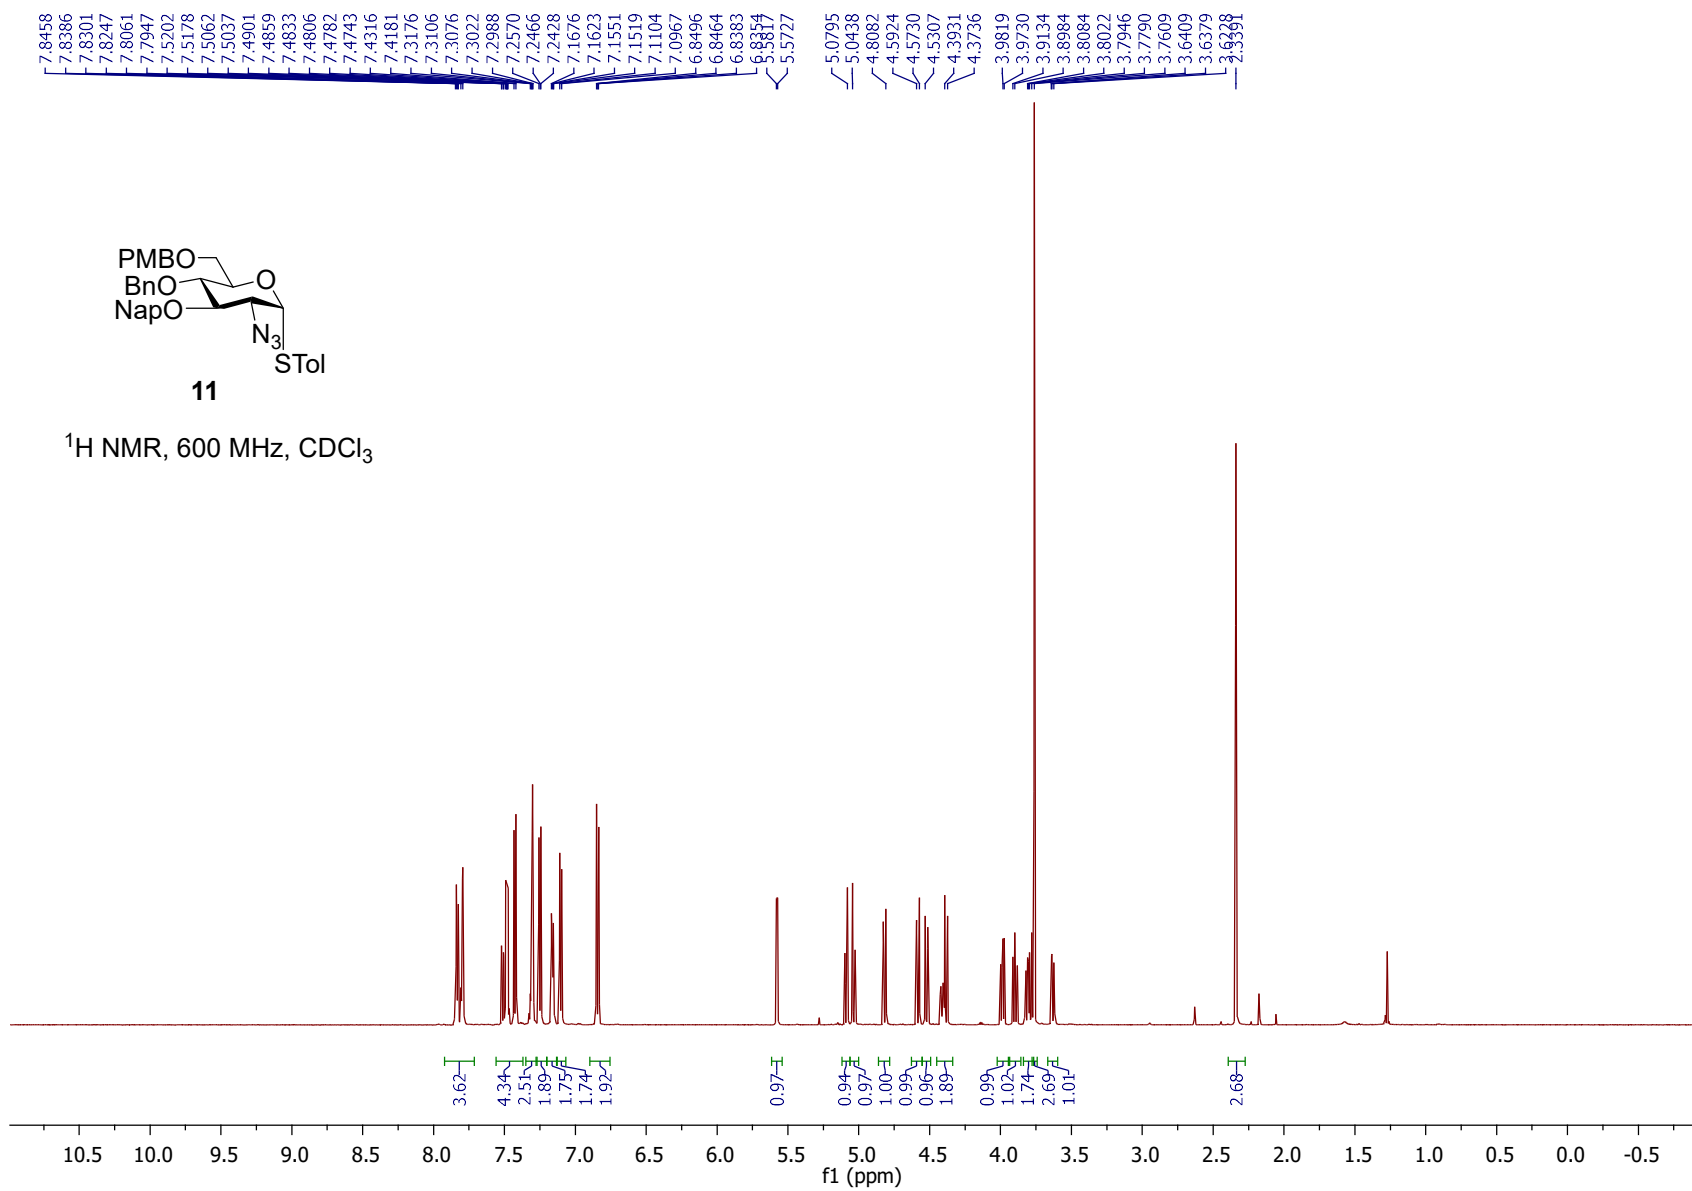

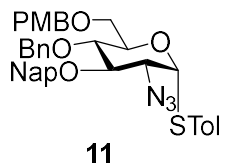

<sup>13</sup>C NMR, 150 MHz, CDCl<sub>3</sub>

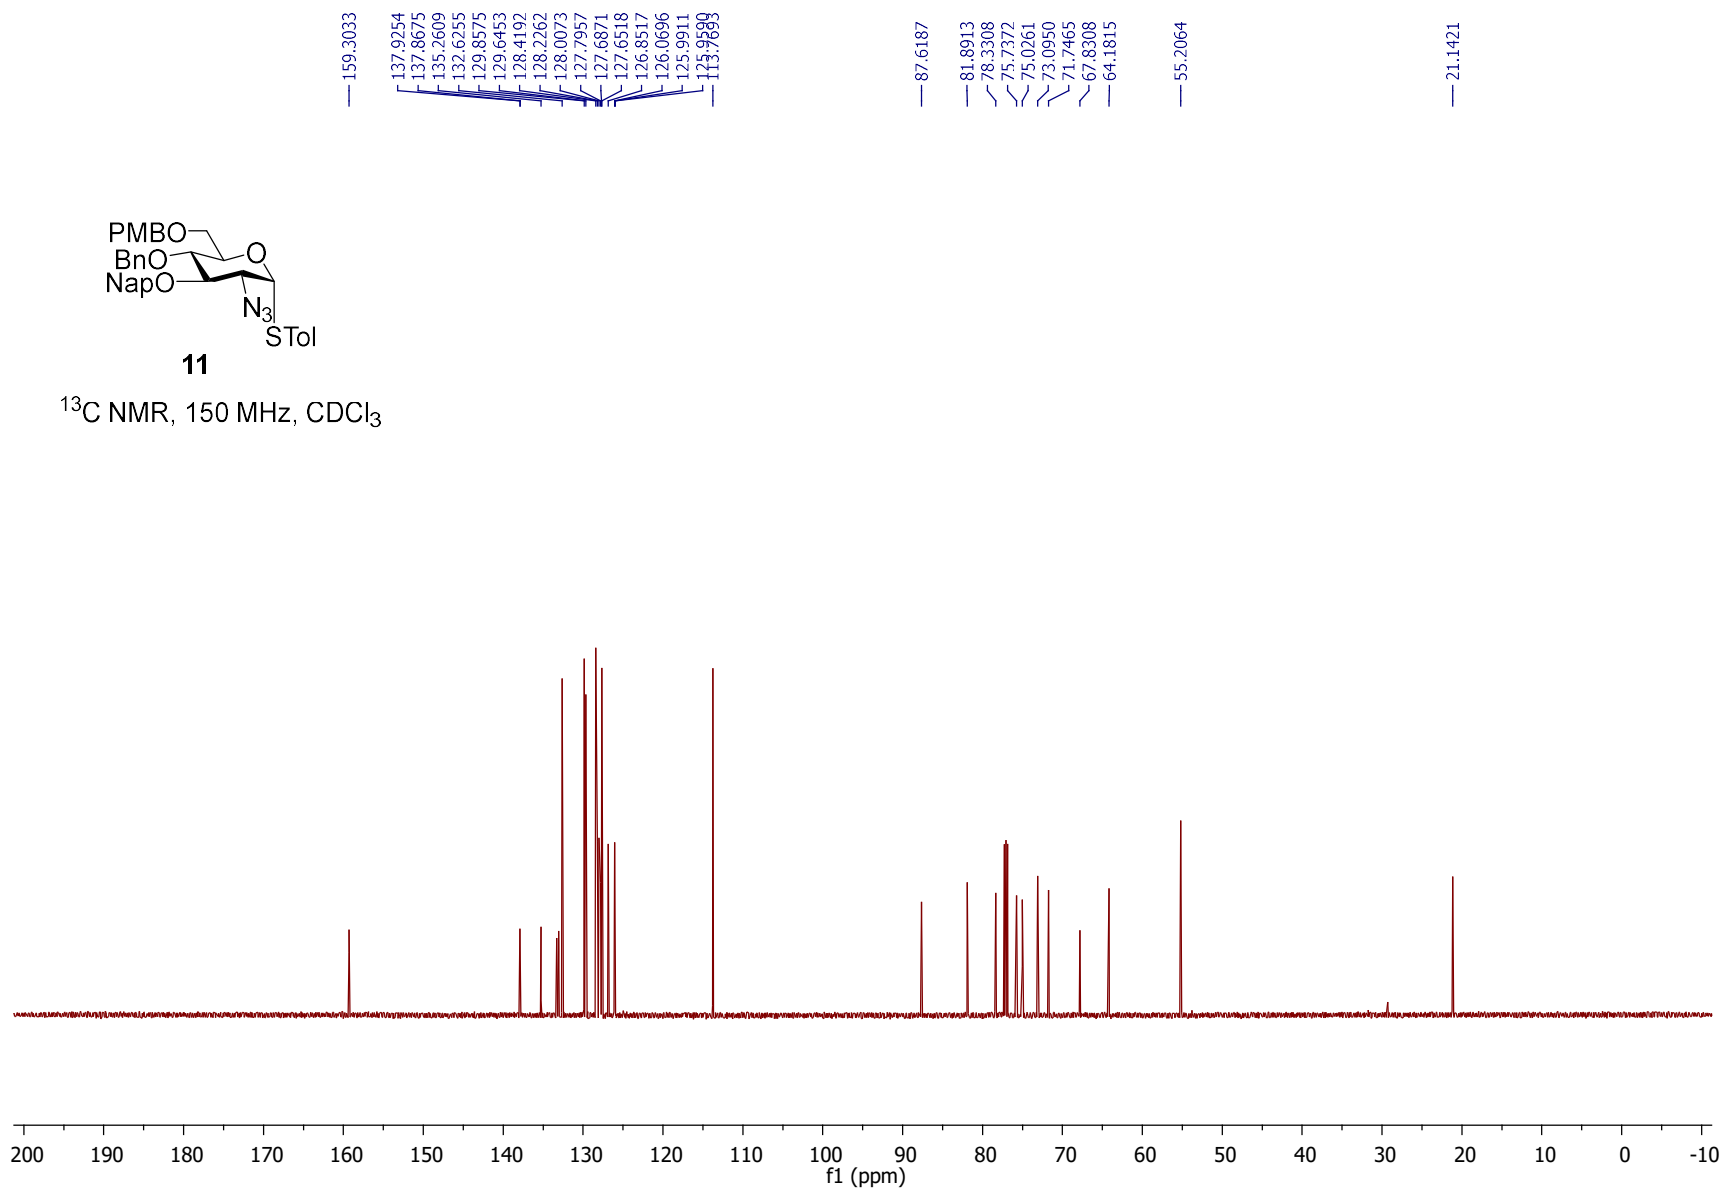

7.8373  
7.8230  
7.8173  
7.8108  
7.7997  
7.7868  
7.7589  
7.6402  
7.6289  
7.6265  
7.5367  
7.5333  
7.5235  
7.5210  
7.4990  
7.4901  
7.4869  
7.4834  
7.4781  
7.4747  
7.4539  
7.4516  
7.4398  
7.4377  
7.3965  
7.3848  
7.3704  
7.3587  
7.3454  
7.3389  
7.3375  
7.3281  
7.3163  
7.2823  
7.2731  
7.2711  
7.2620  
7.2505  
7.2383  
7.2262  
7.2102  
7.1978  
7.1861  
7.1656  
7.1636  
7.0772  
7.0654  
5.6473  
5.6383  
4.9407  
4.9231  
4.9024  
4.8844  
4.8656  
4.8531  
4.8286  
4.8102  
4.7896  
4.7790  
4.7691  
4.7224  
4.6145  
4.5987  
4.5943  
4.5287  
4.5107  
4.4365  
4.4365  
3.9936  
3.9767  
3.9677  
3.8599  
3.8454  
3.8410  
3.8344  
3.8288  
3.8020  
3.7862  
3.6914  
3.6763  
3.5289  
3.3805

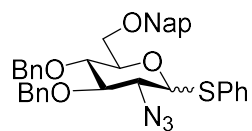

**12**

<sup>1</sup>H NMR, 600 MHz, CDCl<sub>3</sub>

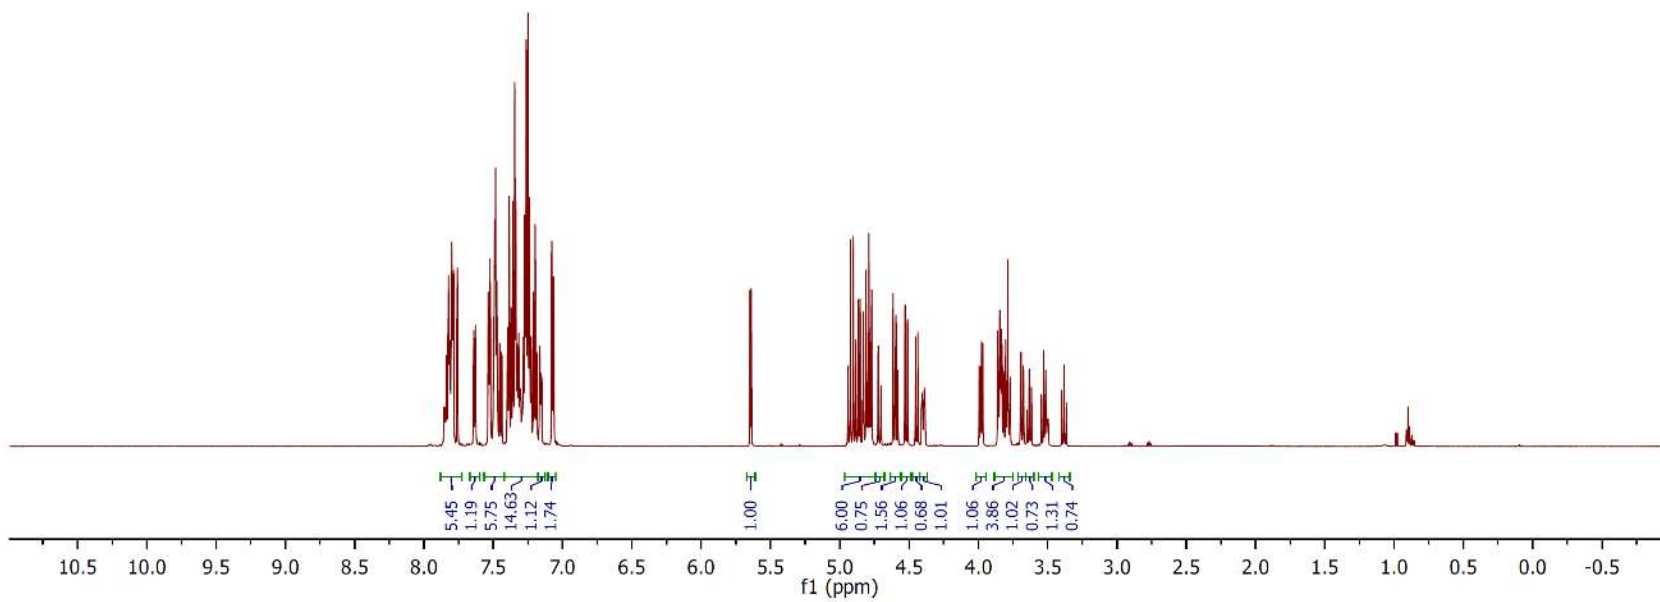

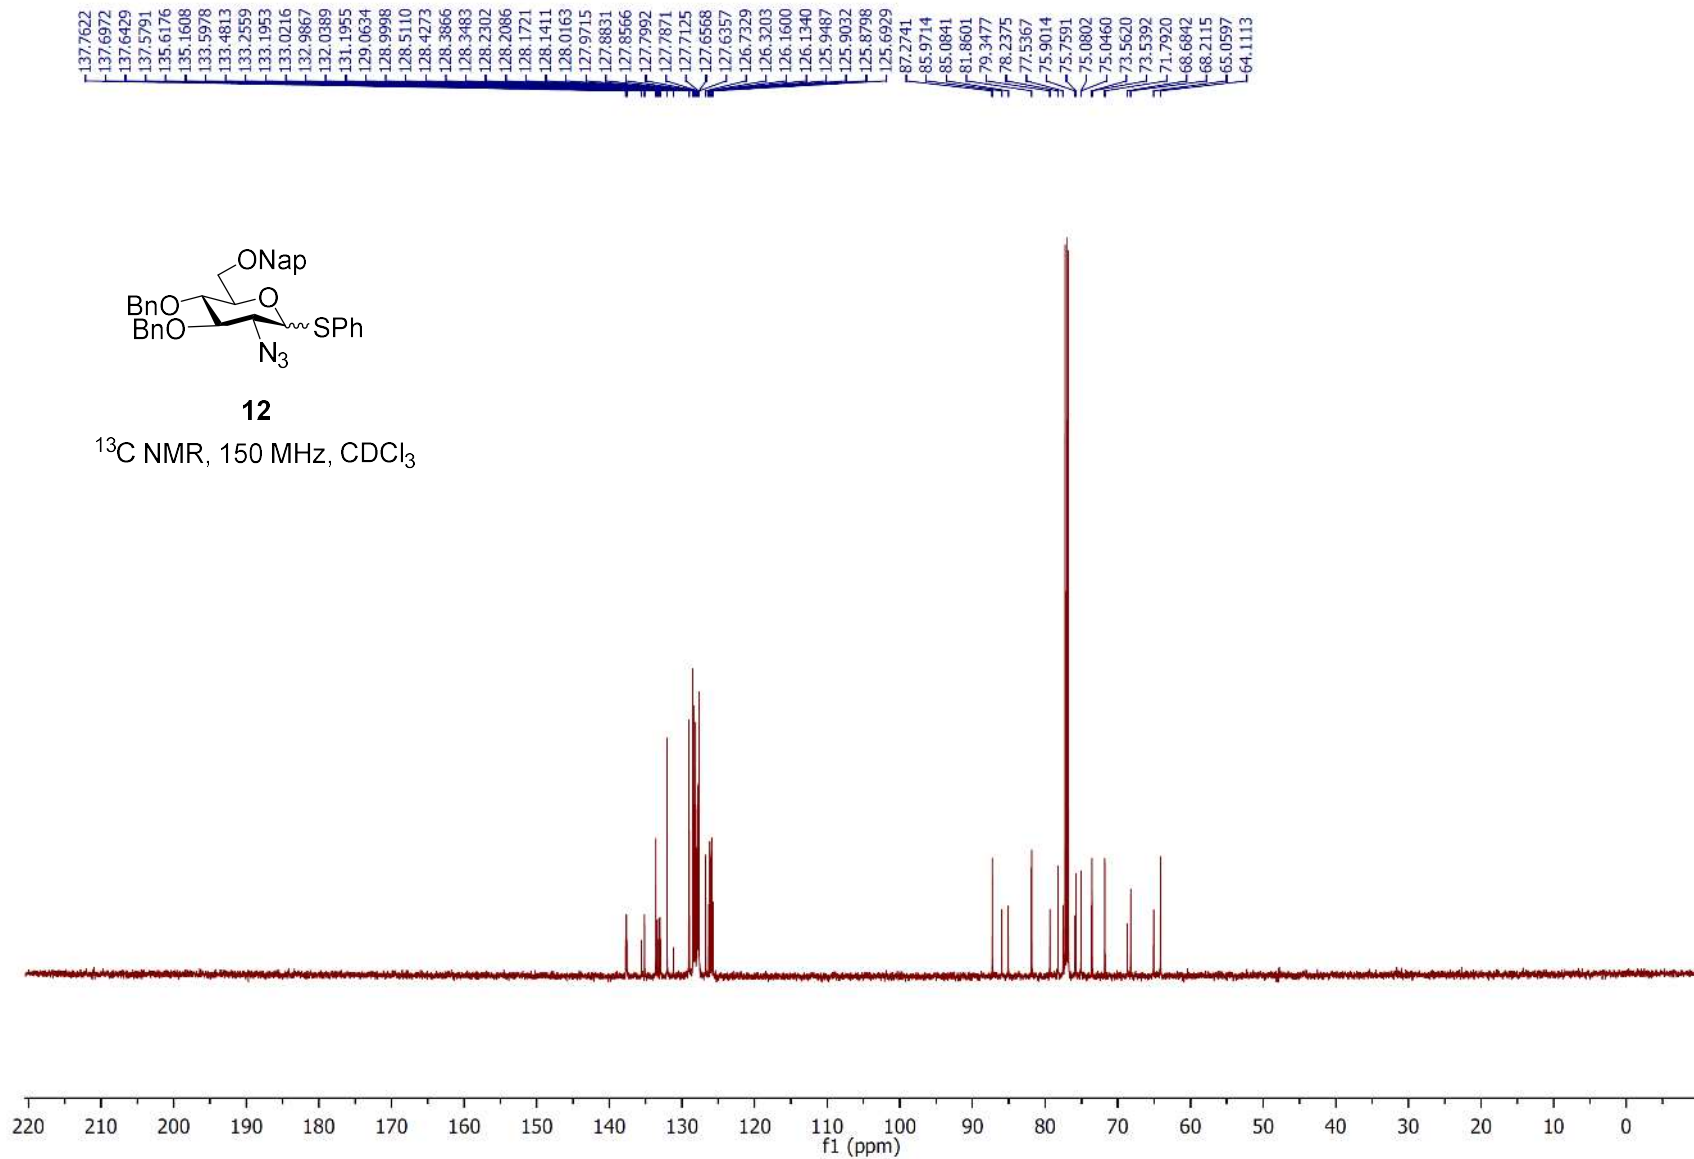

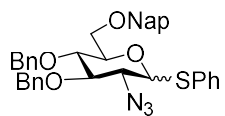

**12**

$^1\text{H}$ - $^{13}\text{C}$  HSQC, 600/150MHz,  $\text{CDCl}_3$

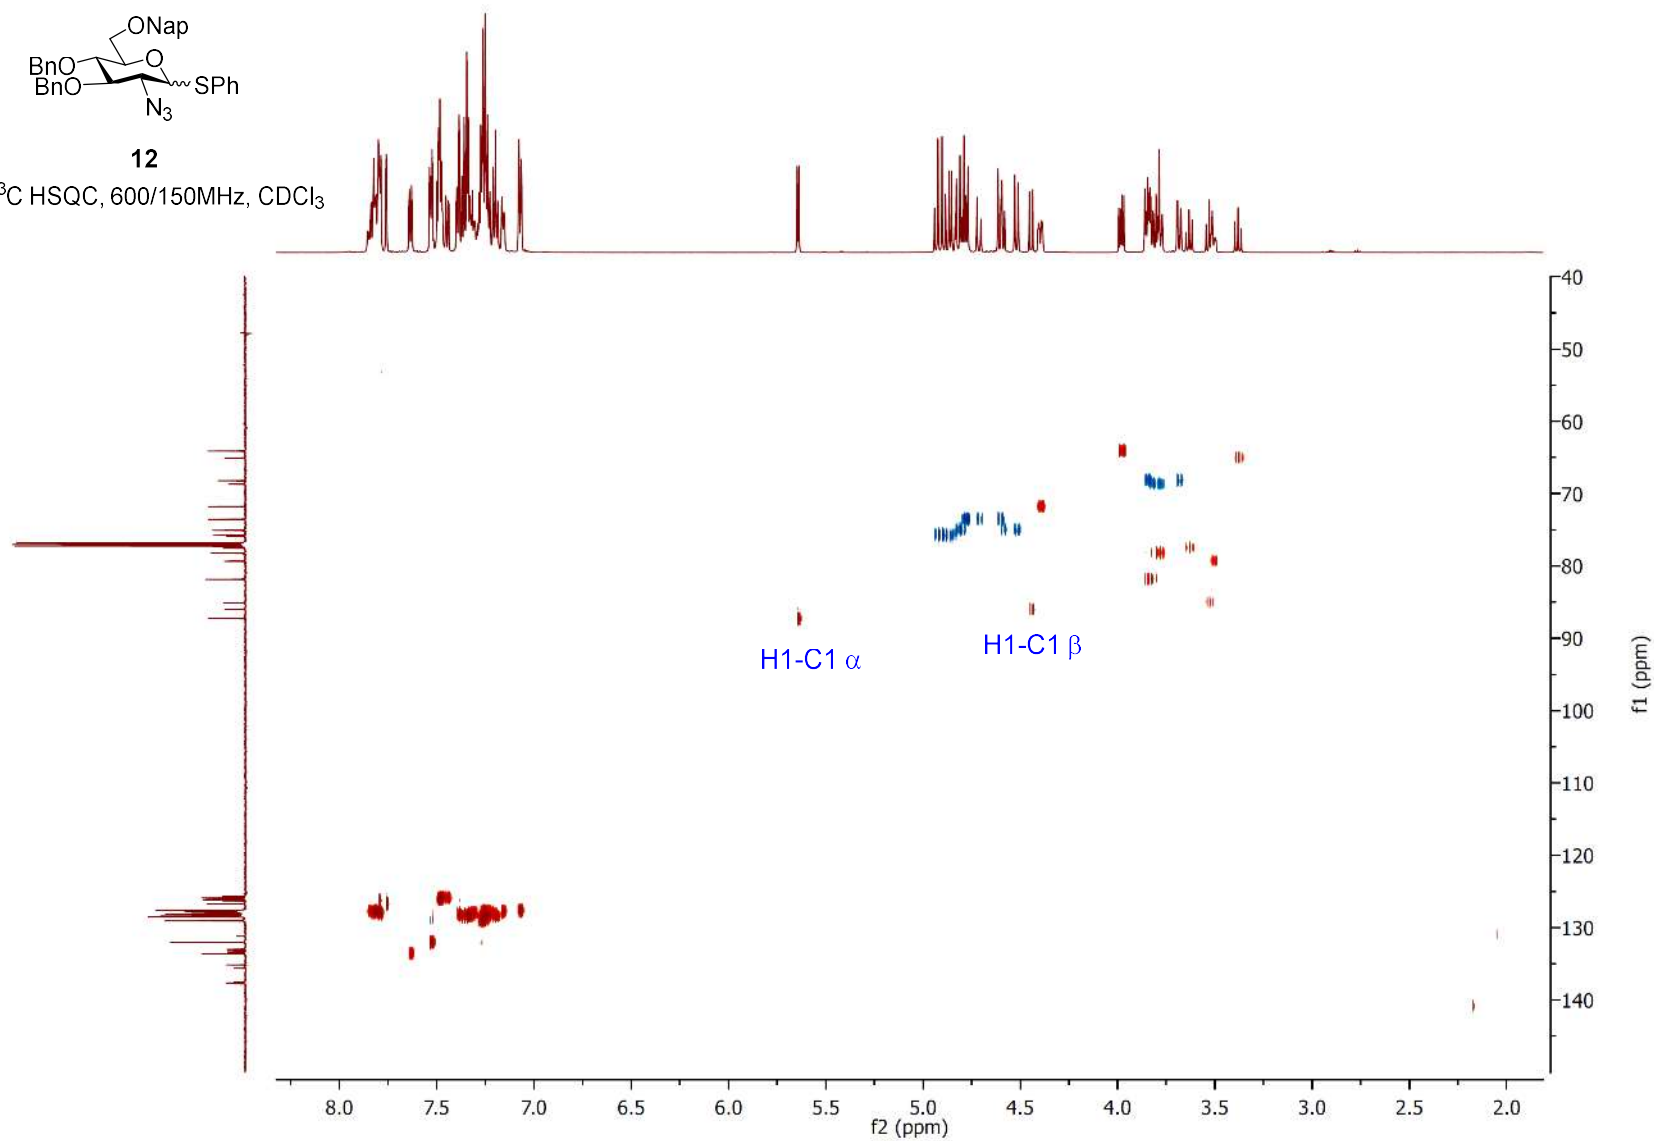



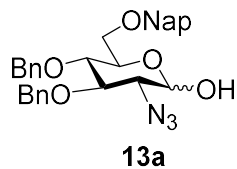

$^1\text{H}$  NMR, 600 MHz,  $\text{CDCl}_3$

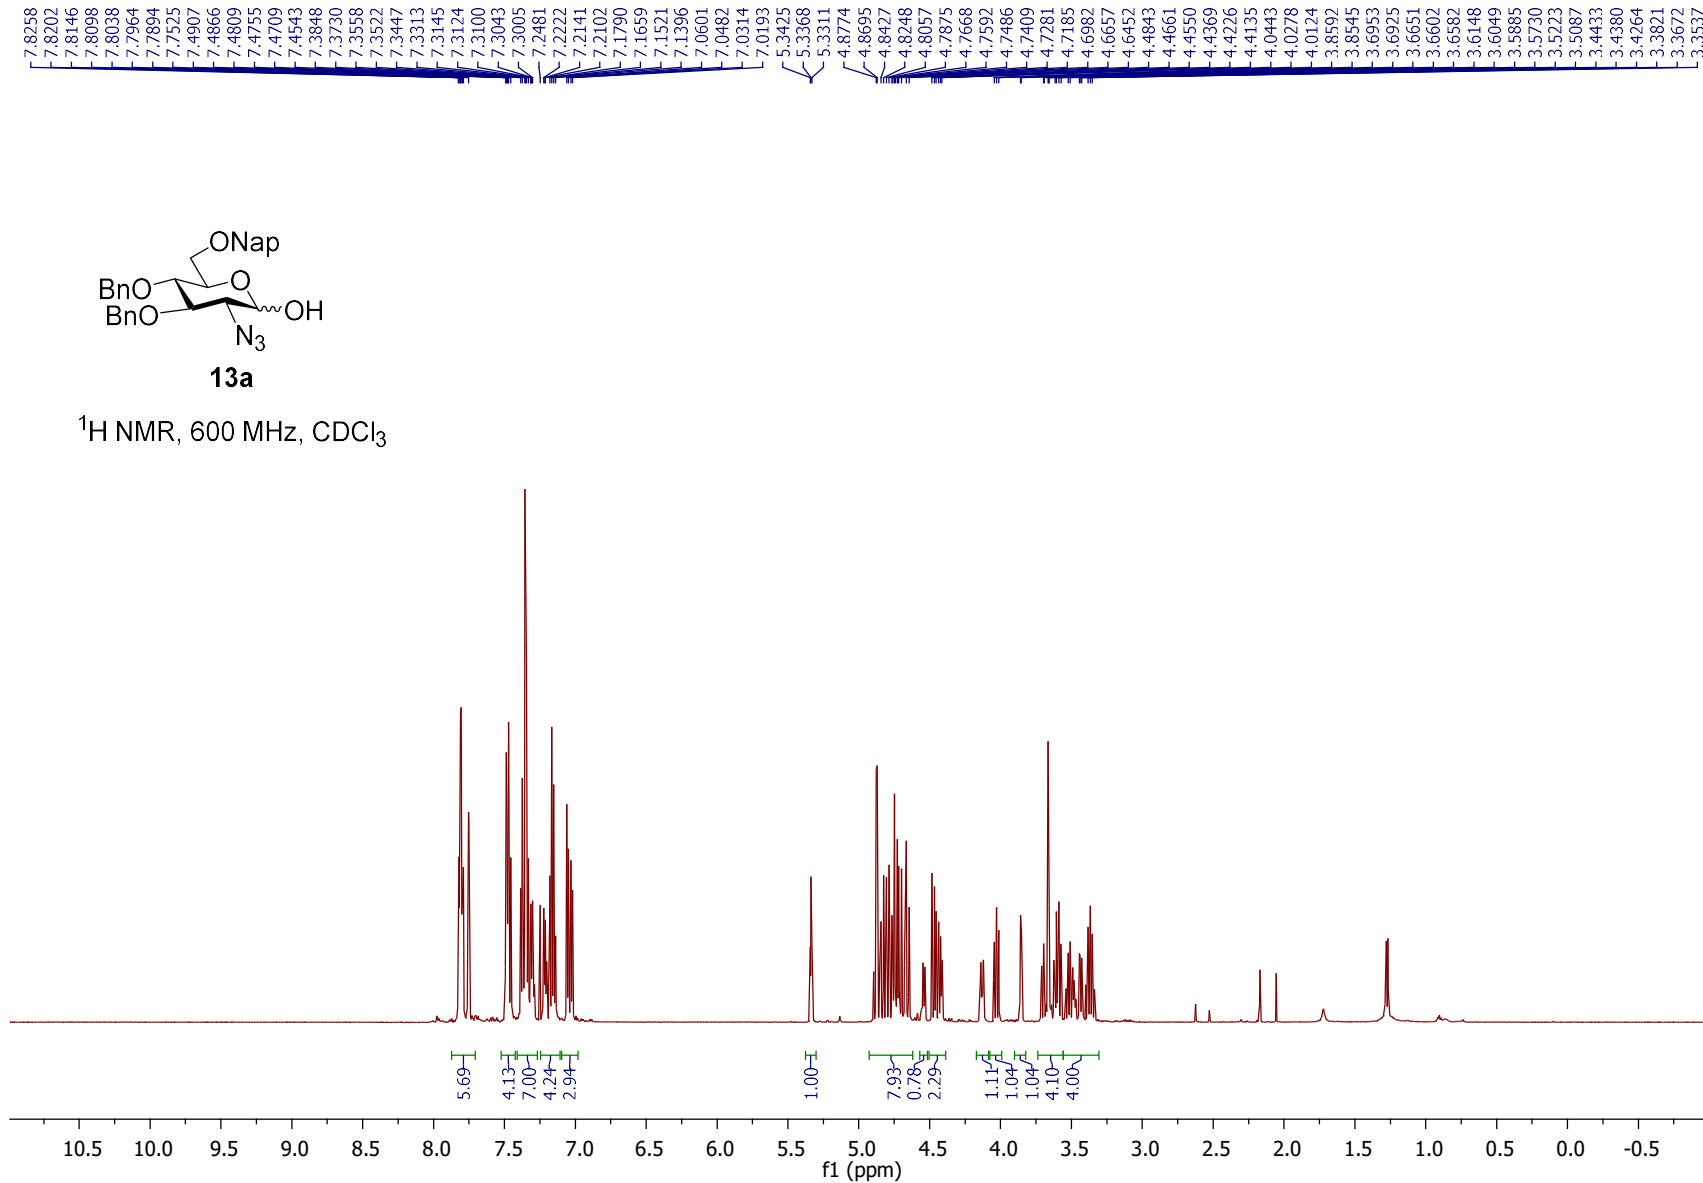

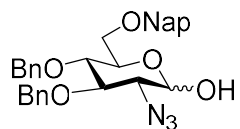

**13a**

<sup>13</sup>C NMR, 150 MHz, CDCl<sub>3</sub>

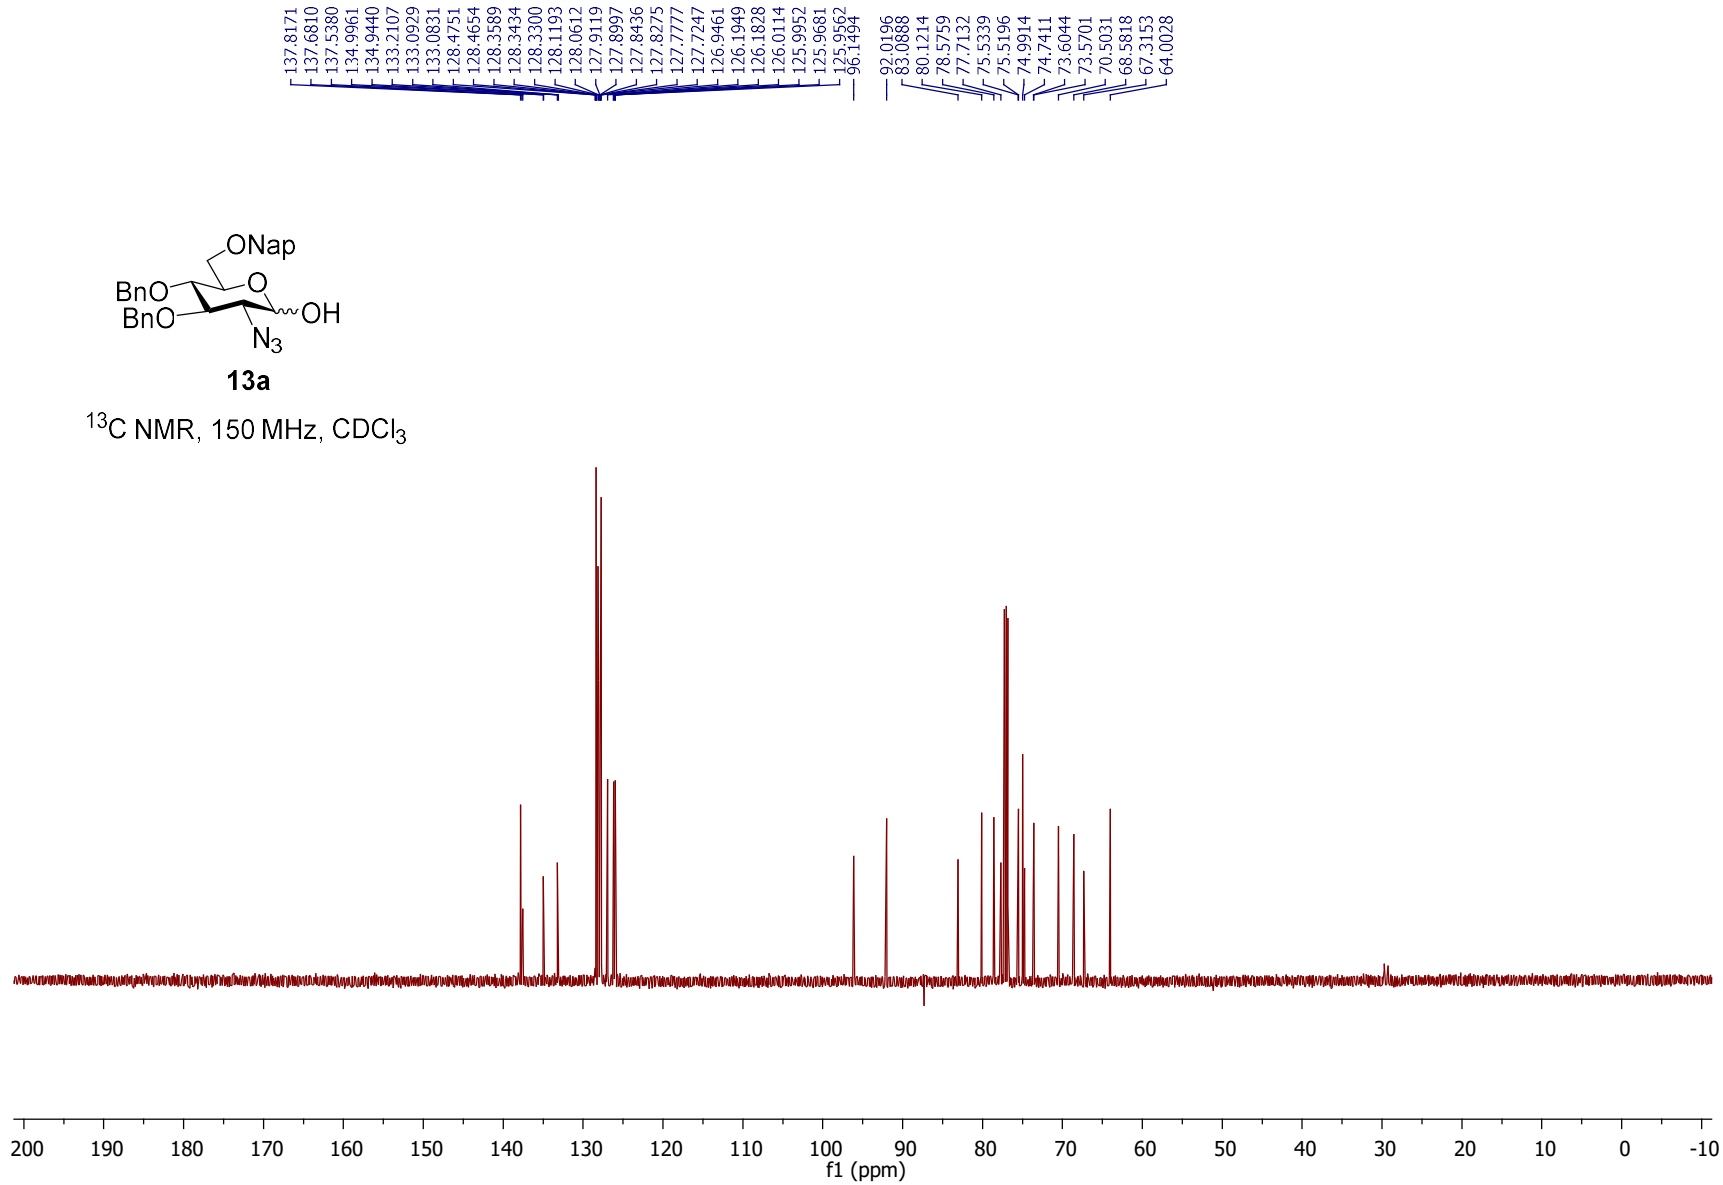

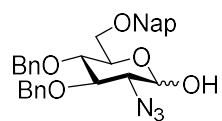

**13a**

$^1\text{H}$ - $^{13}\text{C}$  HSQC, 600/150MHz,  $\text{CDCl}_3$

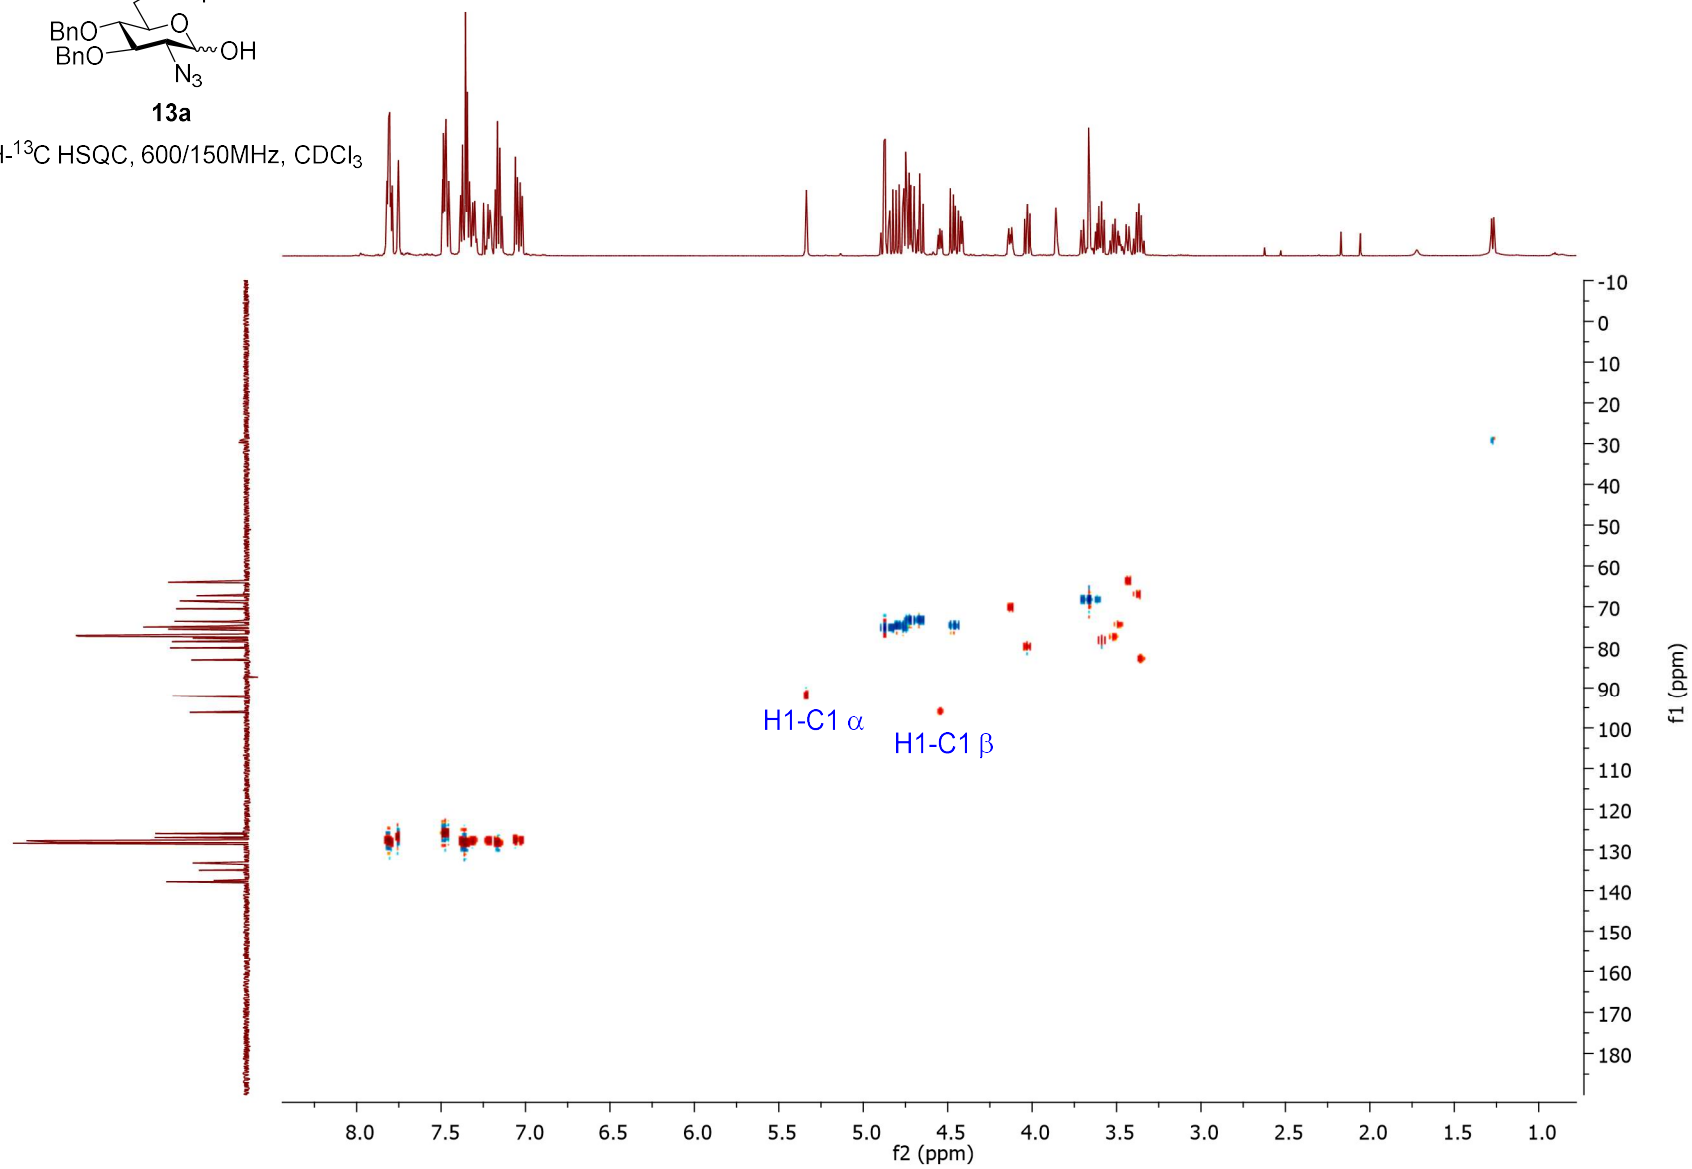

8.7155  
8.7120  
8.1762  
8.1709  
8.1685  
8.1612  
7.8169  
7.8096  
7.8038  
7.7999  
7.7943  
7.7884  
7.7845  
7.7777  
7.7631  
7.7352  
7.6845  
7.6770  
7.6744  
7.6693  
7.4787  
7.4732  
7.4680  
7.4631  
7.4576  
7.4442  
7.4417  
7.2034  
7.2012  
7.1913  
7.1791  
7.1550  
7.1488  
7.1366  
7.1339  
7.1279  
7.1247  
7.1192  
7.1167  
7.1100  
7.0931  
7.0902  
7.0831  
7.0773  
7.0633  
7.0539  
7.0420  
5.0452  
5.0323  
4.8047  
4.7945  
4.7763  
4.7246  
4.6910  
4.6880  
4.6618  
4.6438  
4.5428  
4.5248  
4.5164  
4.4992  
4.4812  
3.9209  
3.9056  
3.8903  
3.7718  
3.7568  
3.7551  
3.7224  
3.7197  
3.7154  
3.7060  
3.7041  
3.6925  
3.6834  
3.6757  
3.6658  
3.6505  
3.6348  
3.3763  
3.3606  
3.3476

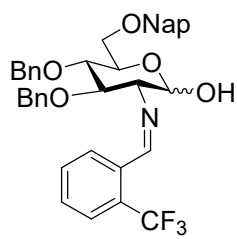

**13c**

$^1\text{H NMR}$ , 600 MHz,  $\text{CDCl}_3$

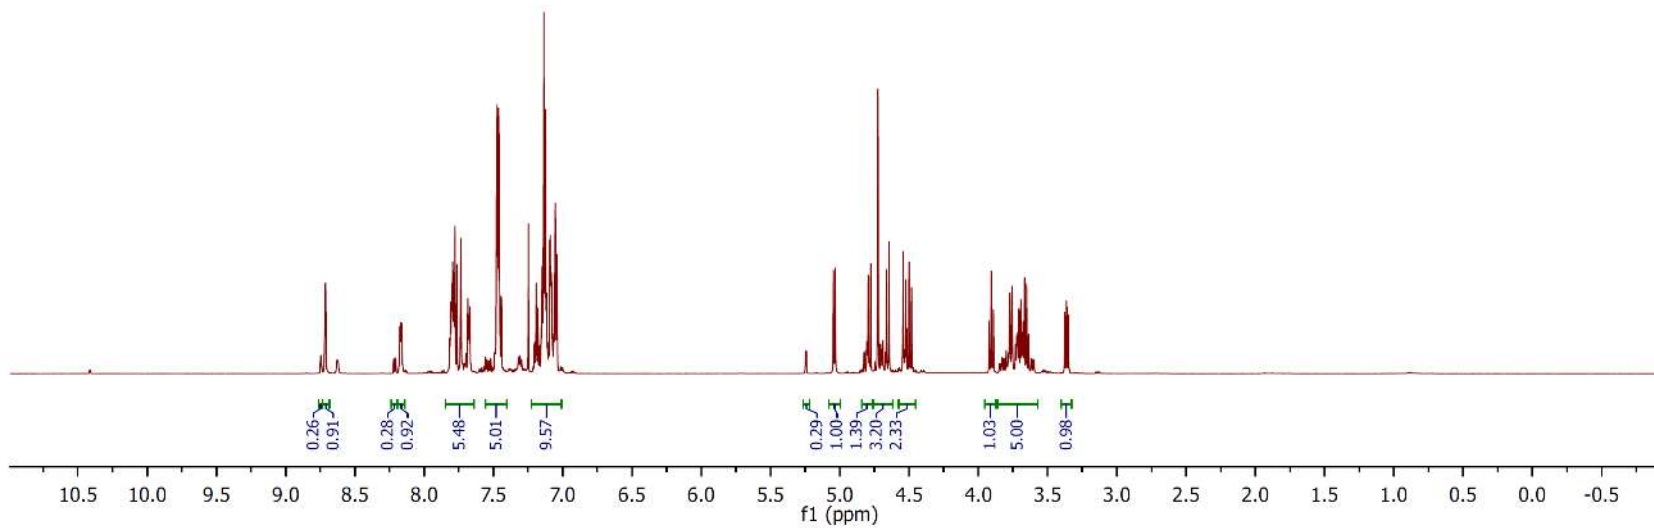

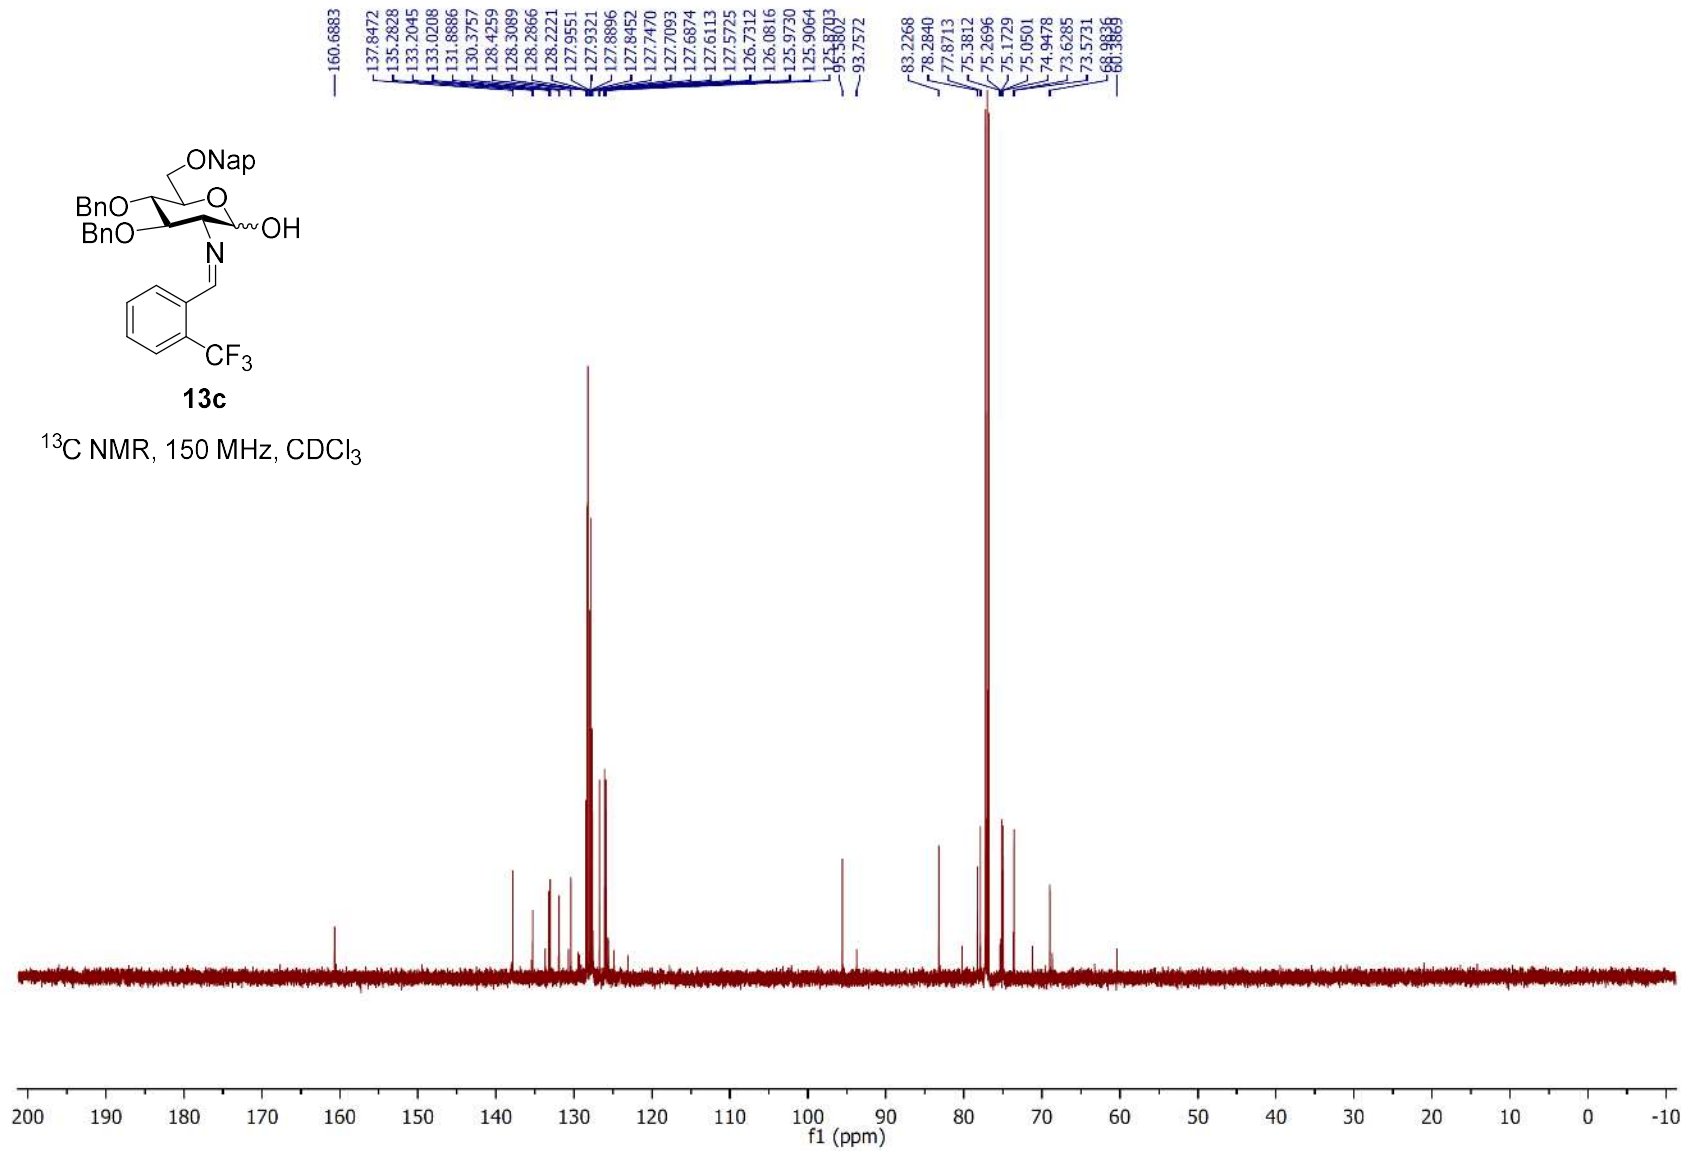

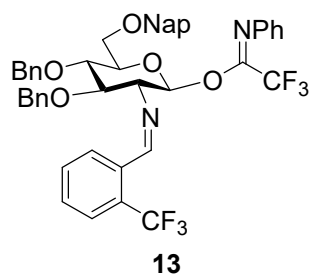

$^1\text{H NMR}$ , 600 MHz,  $\text{CDCl}_3$

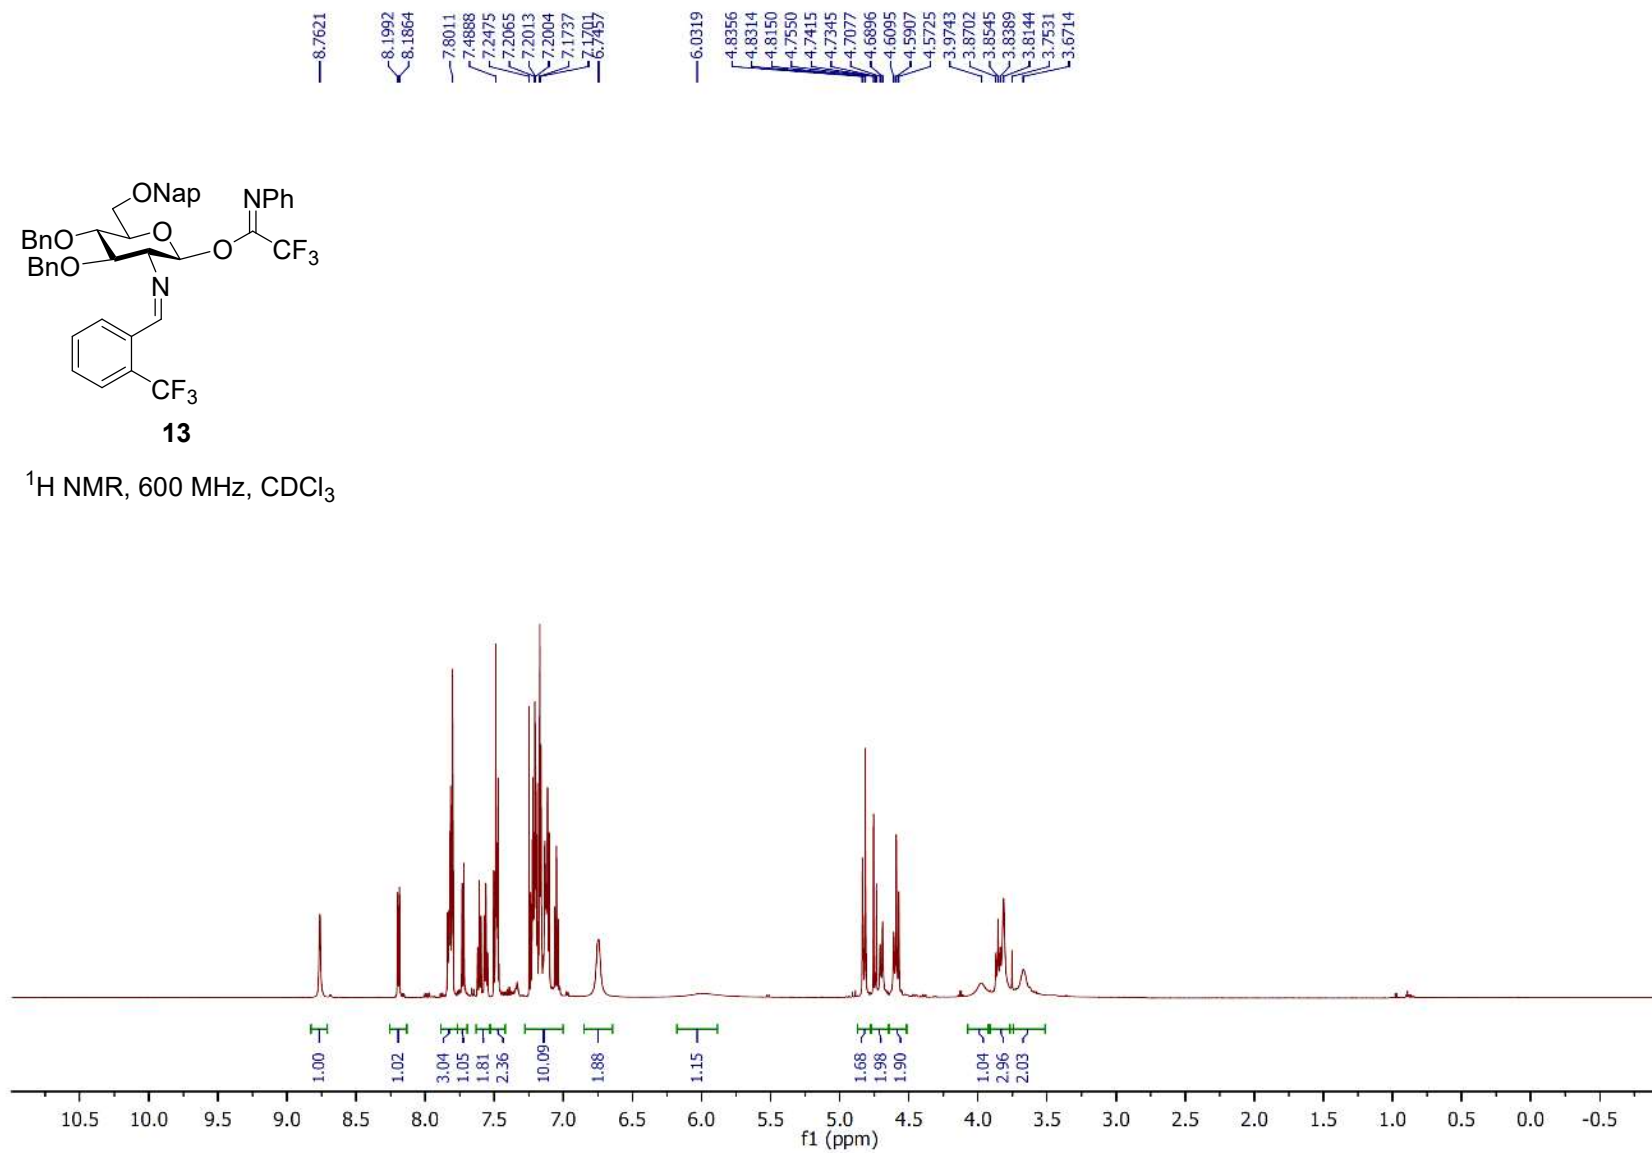

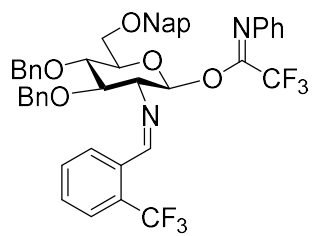

**13**

$^{13}\text{C}$  NMR, 150 MHz,  $\text{CDCl}_3$

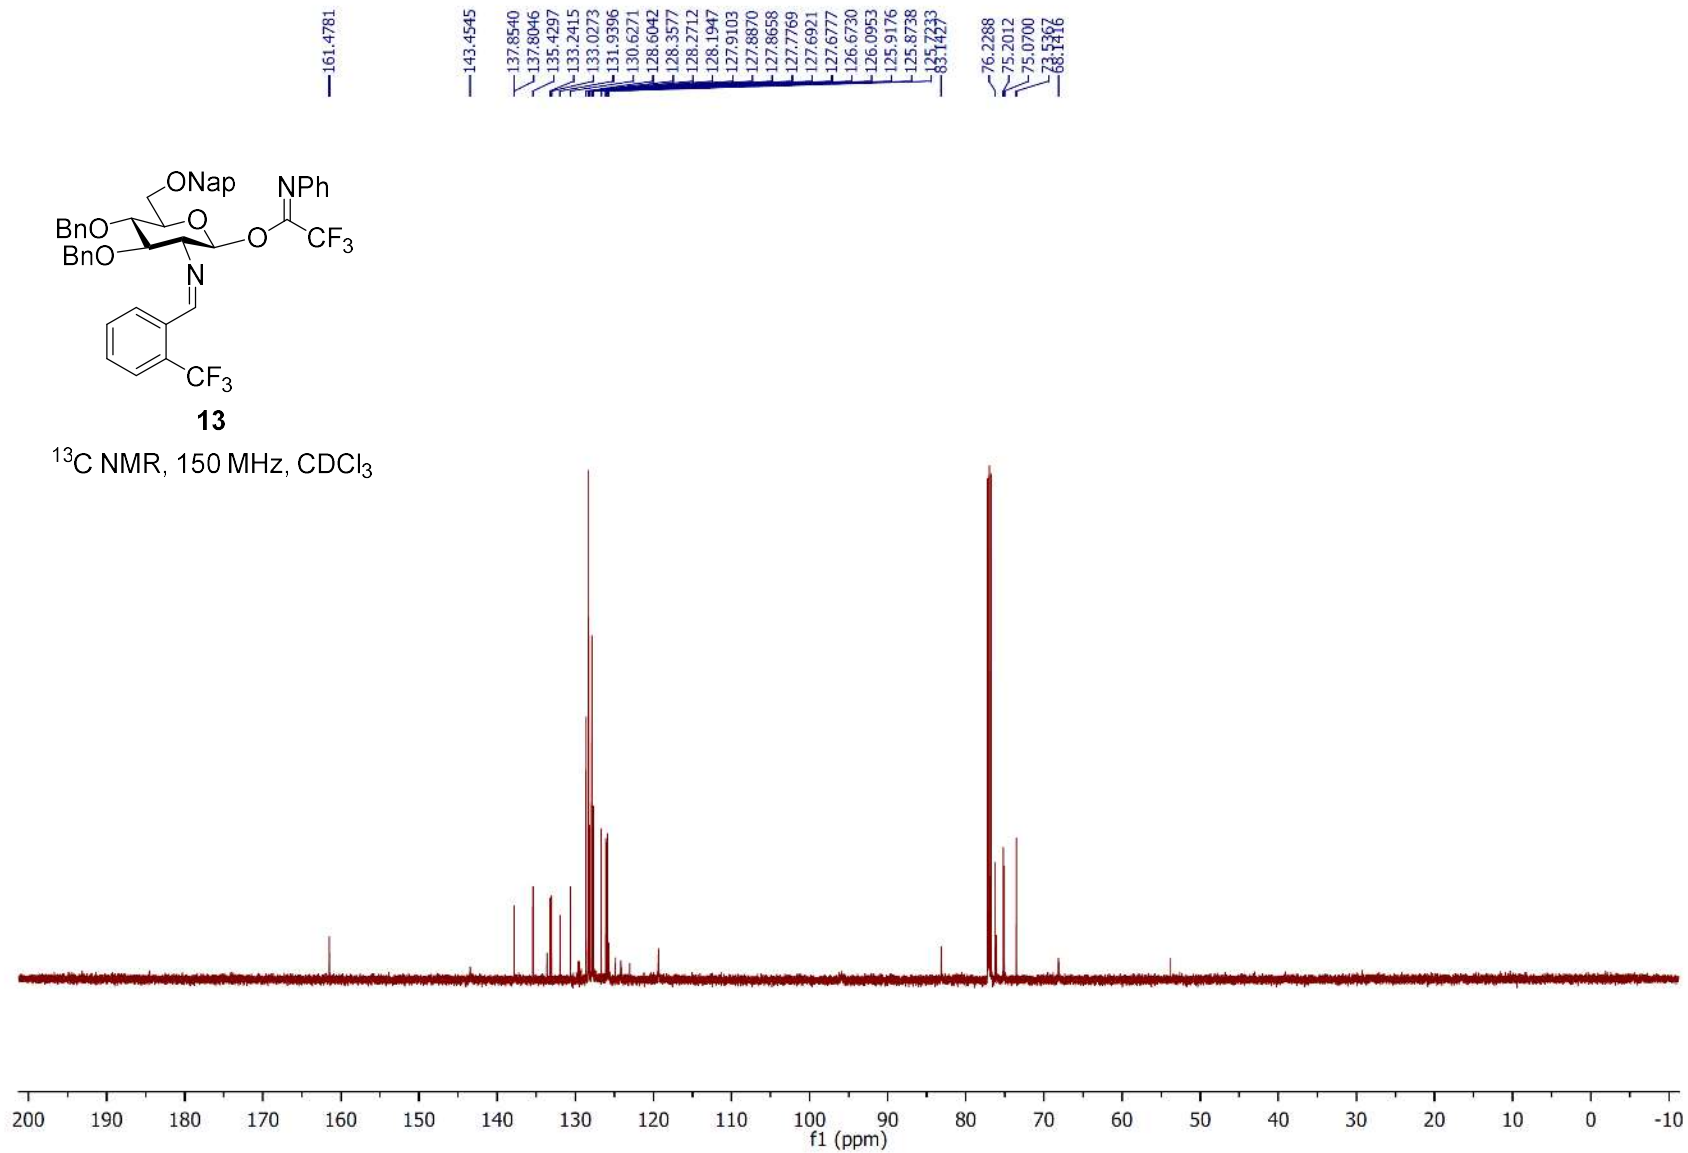

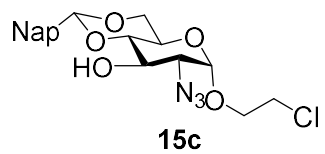

<sup>1</sup>H NMR, 600 MHz, CDCl<sub>3</sub>

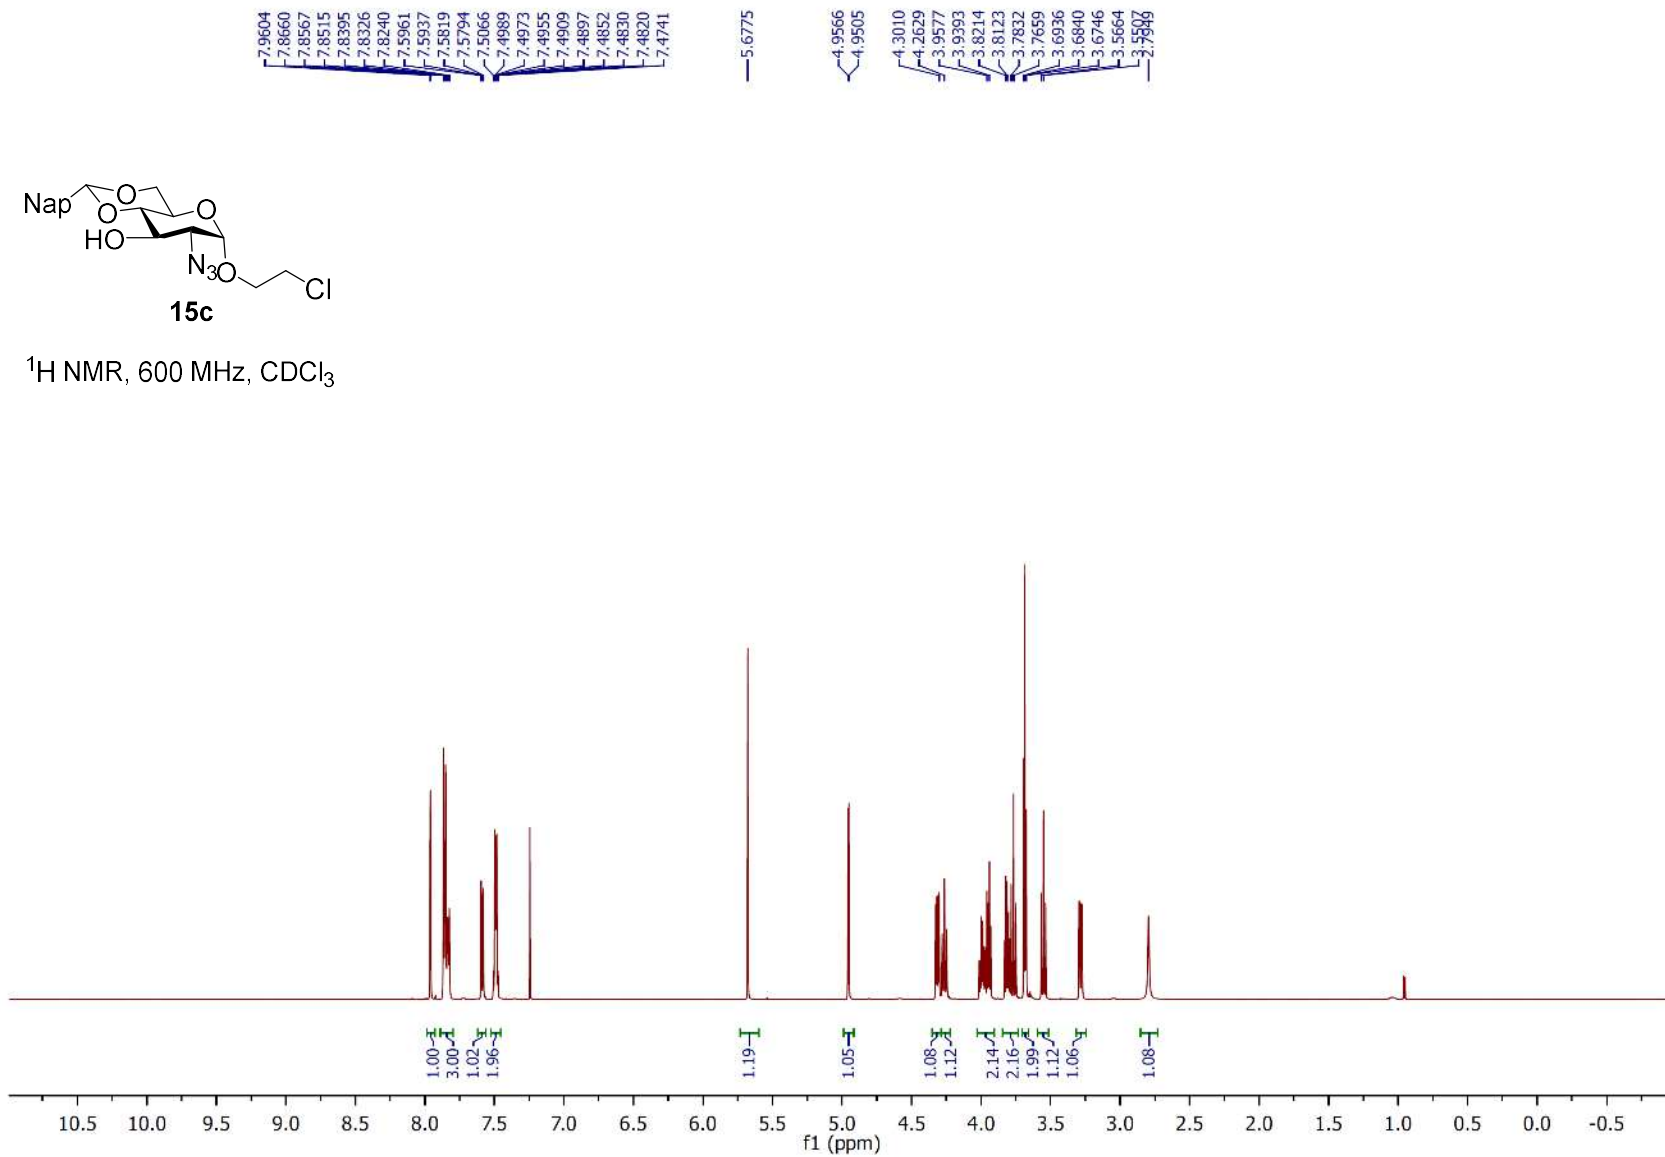



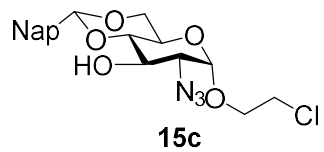

$^{13}\text{C}$  NMR, 150 MHz,  $\text{CDCl}_3$

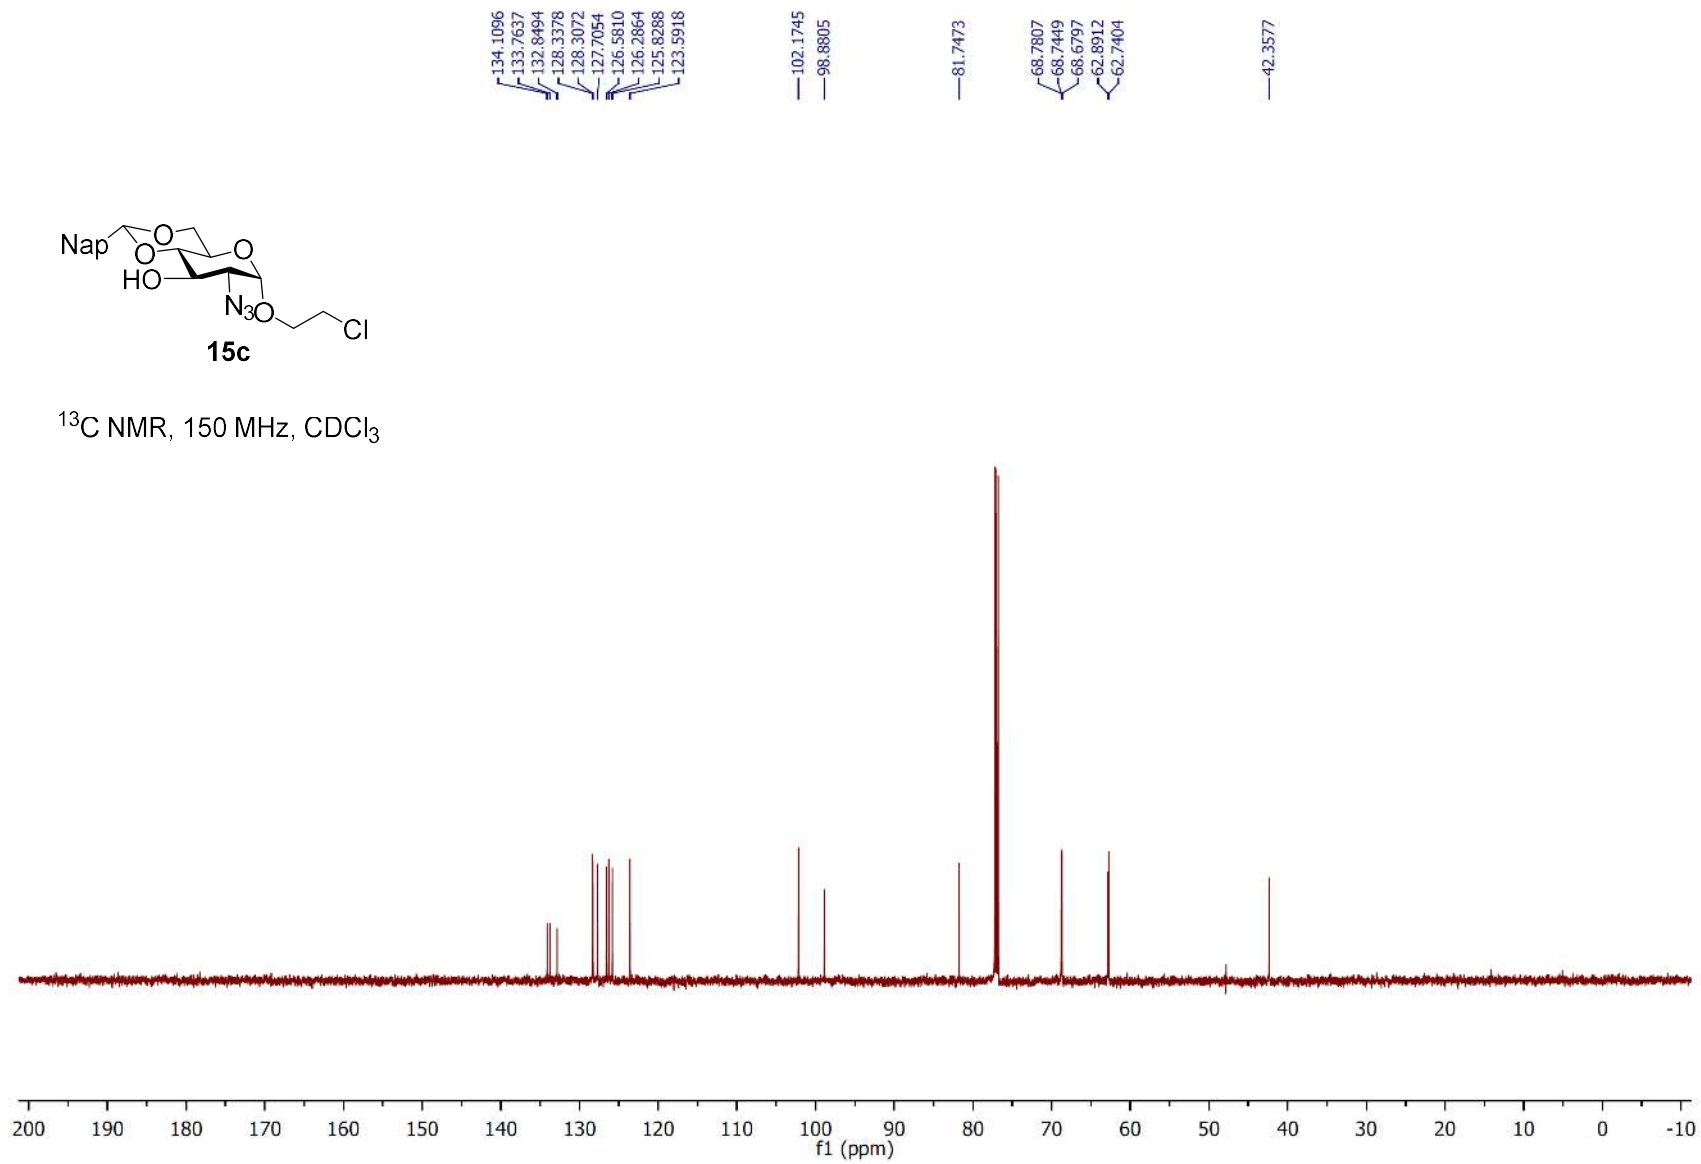

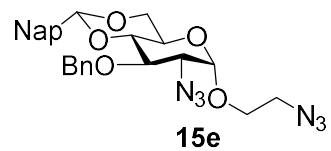

$^1\text{H NMR}$ , 600 MHz,  $\text{CDCl}_3$

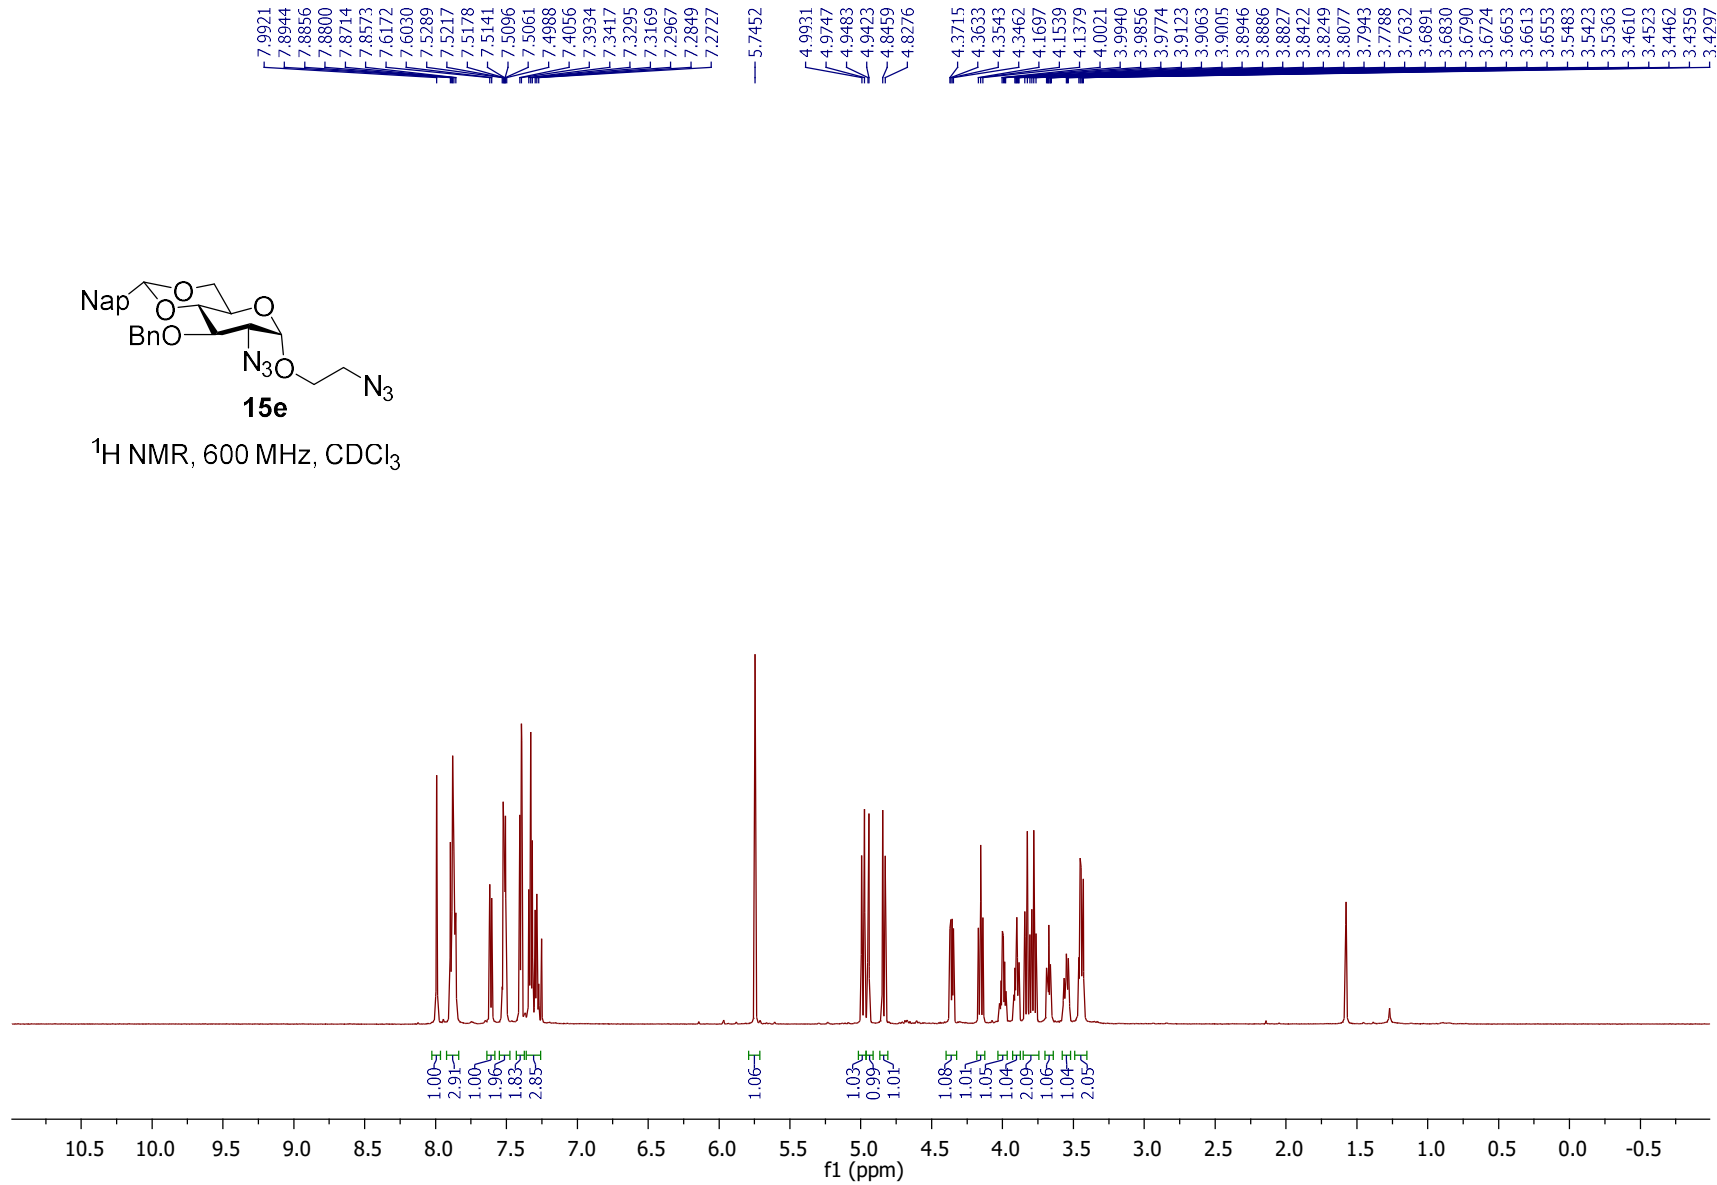

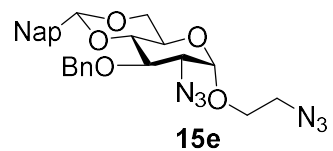

$^{13}\text{C}$  NMR, 150 MHz,  $\text{CDCl}_3$

137.7817  
134.4994  
133.6448  
132.8986  
128.4333  
128.3983  
128.2032  
128.1597  
127.8909  
127.7167  
126.5000  
126.2455  
125.5151  
123.6370

101.6601  
98.7997

82.7869  
75.9625  
75.0913  
68.9170  
67.1592  
63.1256  
62.8628

50.6037

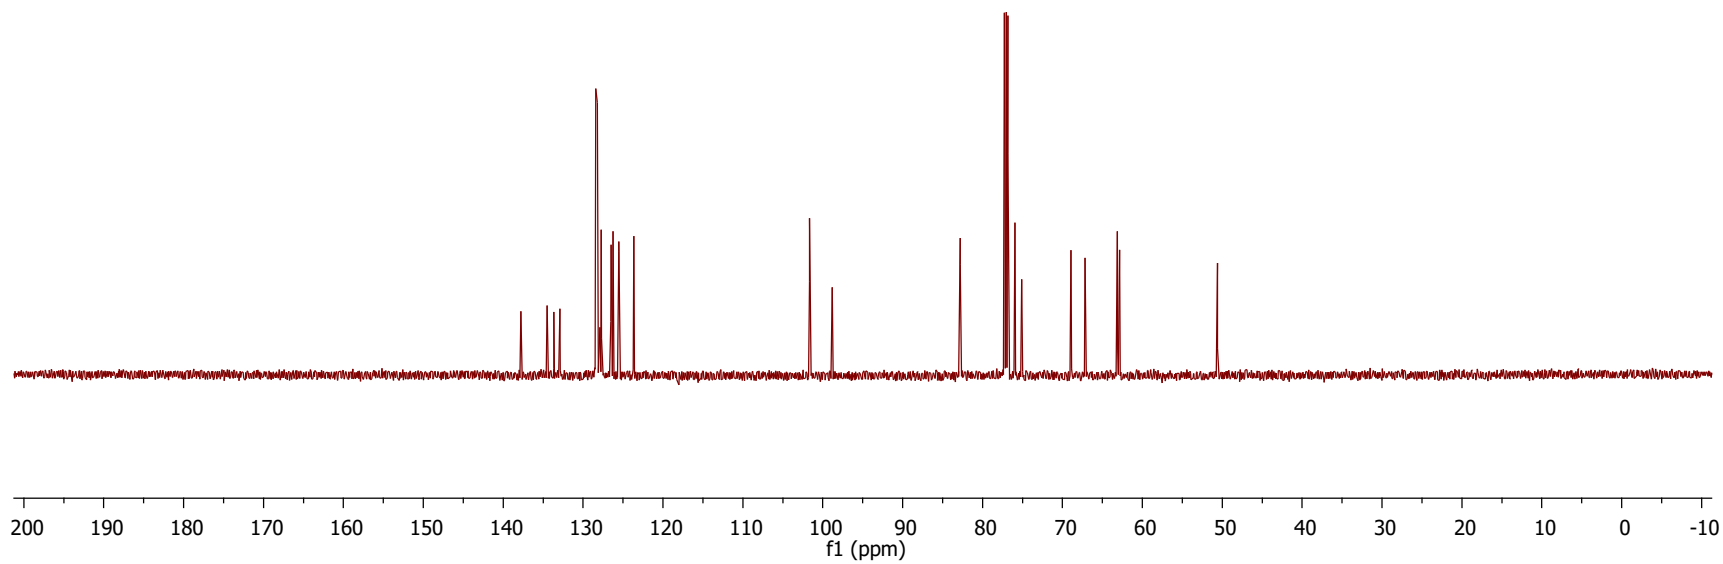

7.8322  
7.8228  
7.8178  
7.8073  
7.7614  
7.4831  
7.4801  
7.4738  
7.4676  
7.4645  
7.4577  
7.4555  
7.4438  
7.4412  
7.4065  
7.4041  
7.3925  
7.3754  
7.3722  
7.3634  
7.3610  
7.3506  
7.3221  
7.3199  
7.3175  
7.3080  
4.9459  
4.9401  
4.9310  
4.9123  
4.7949  
4.7762  
4.7721  
4.7516  
4.7122  
4.6918  
3.8908  
3.8852  
3.8782  
3.8750  
3.8731  
3.8675  
3.8606  
3.8584  
3.8550  
3.8436  
3.8358  
3.8341  
3.8268  
3.8201  
3.7765  
3.7690  
3.7590  
3.7516  
3.7386  
3.7268  
3.7236  
3.7222  
3.7208  
3.7091  
3.7032  
3.6623  
3.6565  
3.6527  
3.6468  
3.6448  
3.6389  
3.6350  
3.6292  
3.5434  
3.5338  
3.5280  
3.5212  
3.5154  
3.3895  
3.3838  
3.3799  
3.3742  
3.3616  
3.3574  
3.3515  
3.3403  
3.3344

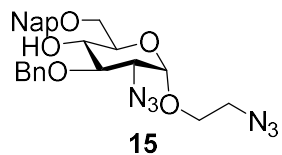

<sup>1</sup>H NMR, 600 MHz, CDCl<sub>3</sub>

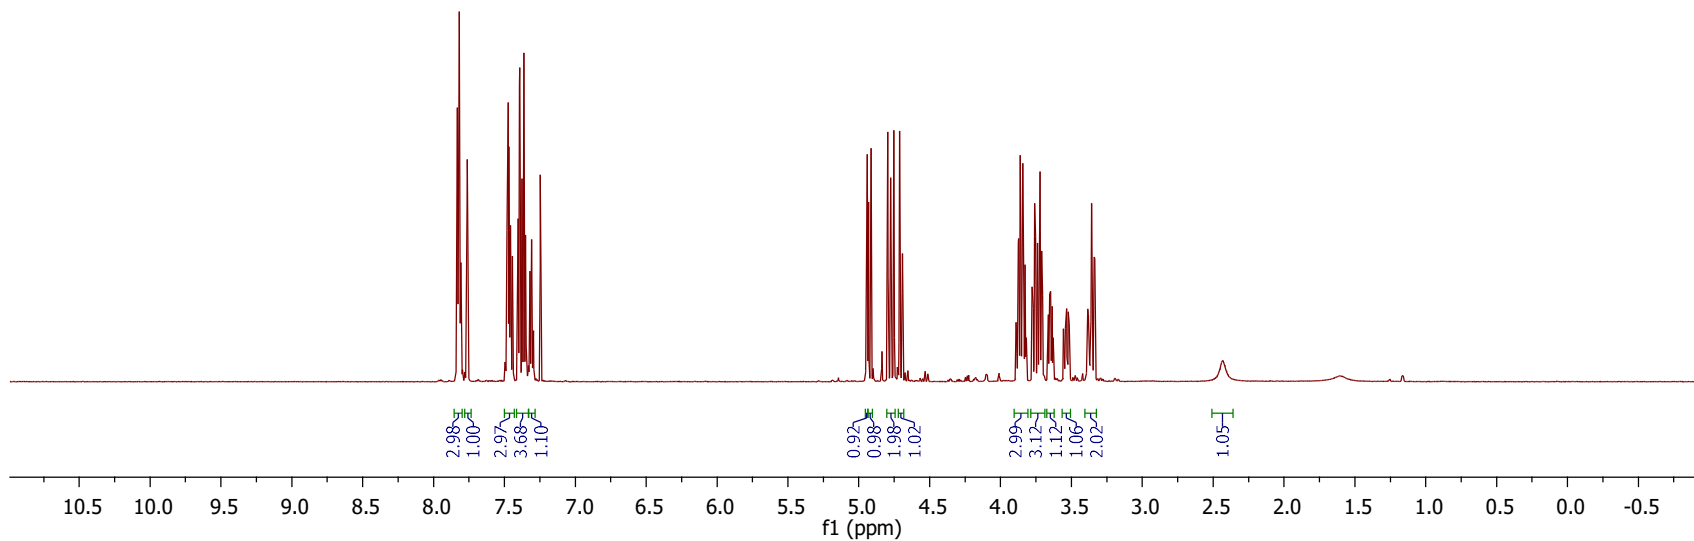

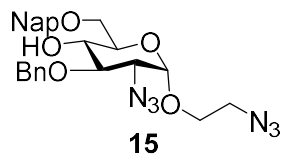

$^{13}\text{C}$  NMR, 150 MHz,  $\text{CDCl}_3$

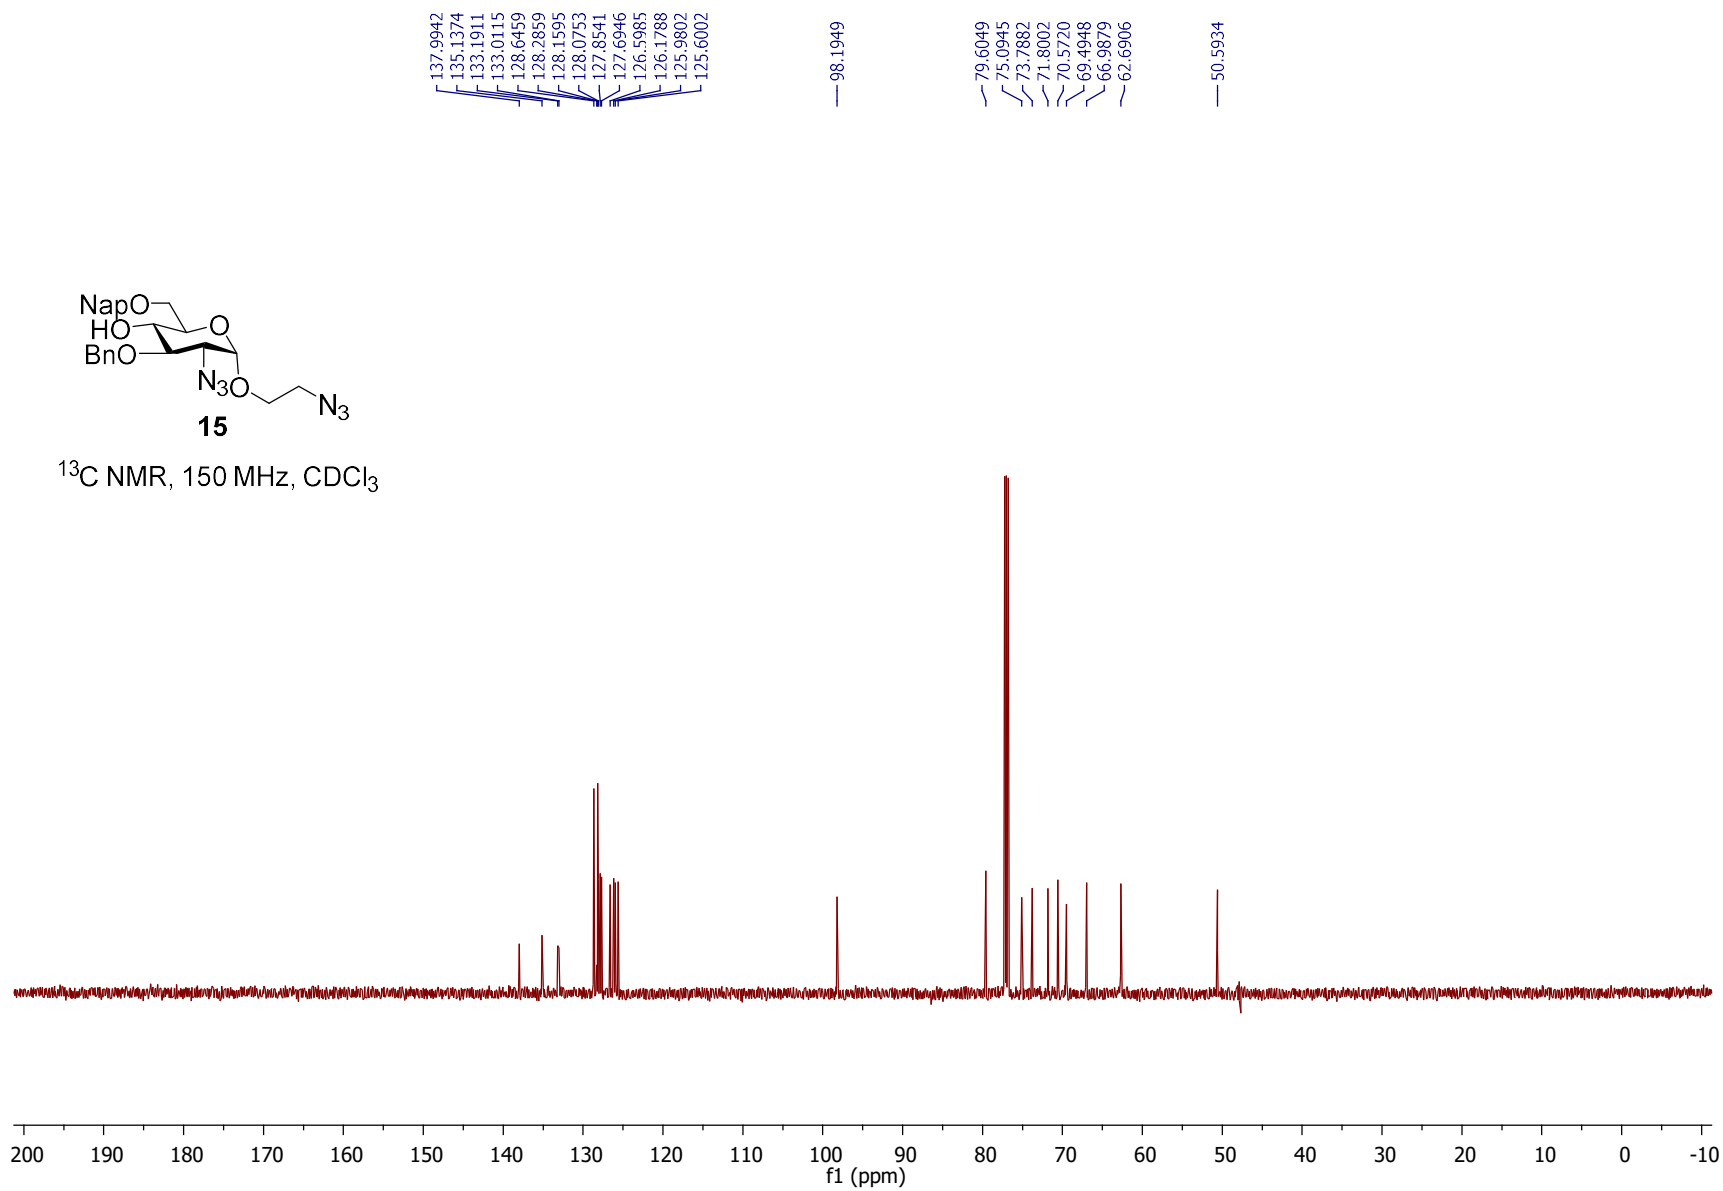

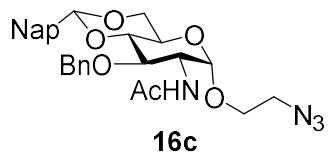

$^1\text{H NMR}$ , 600 MHz,  $\text{CDCl}_3$

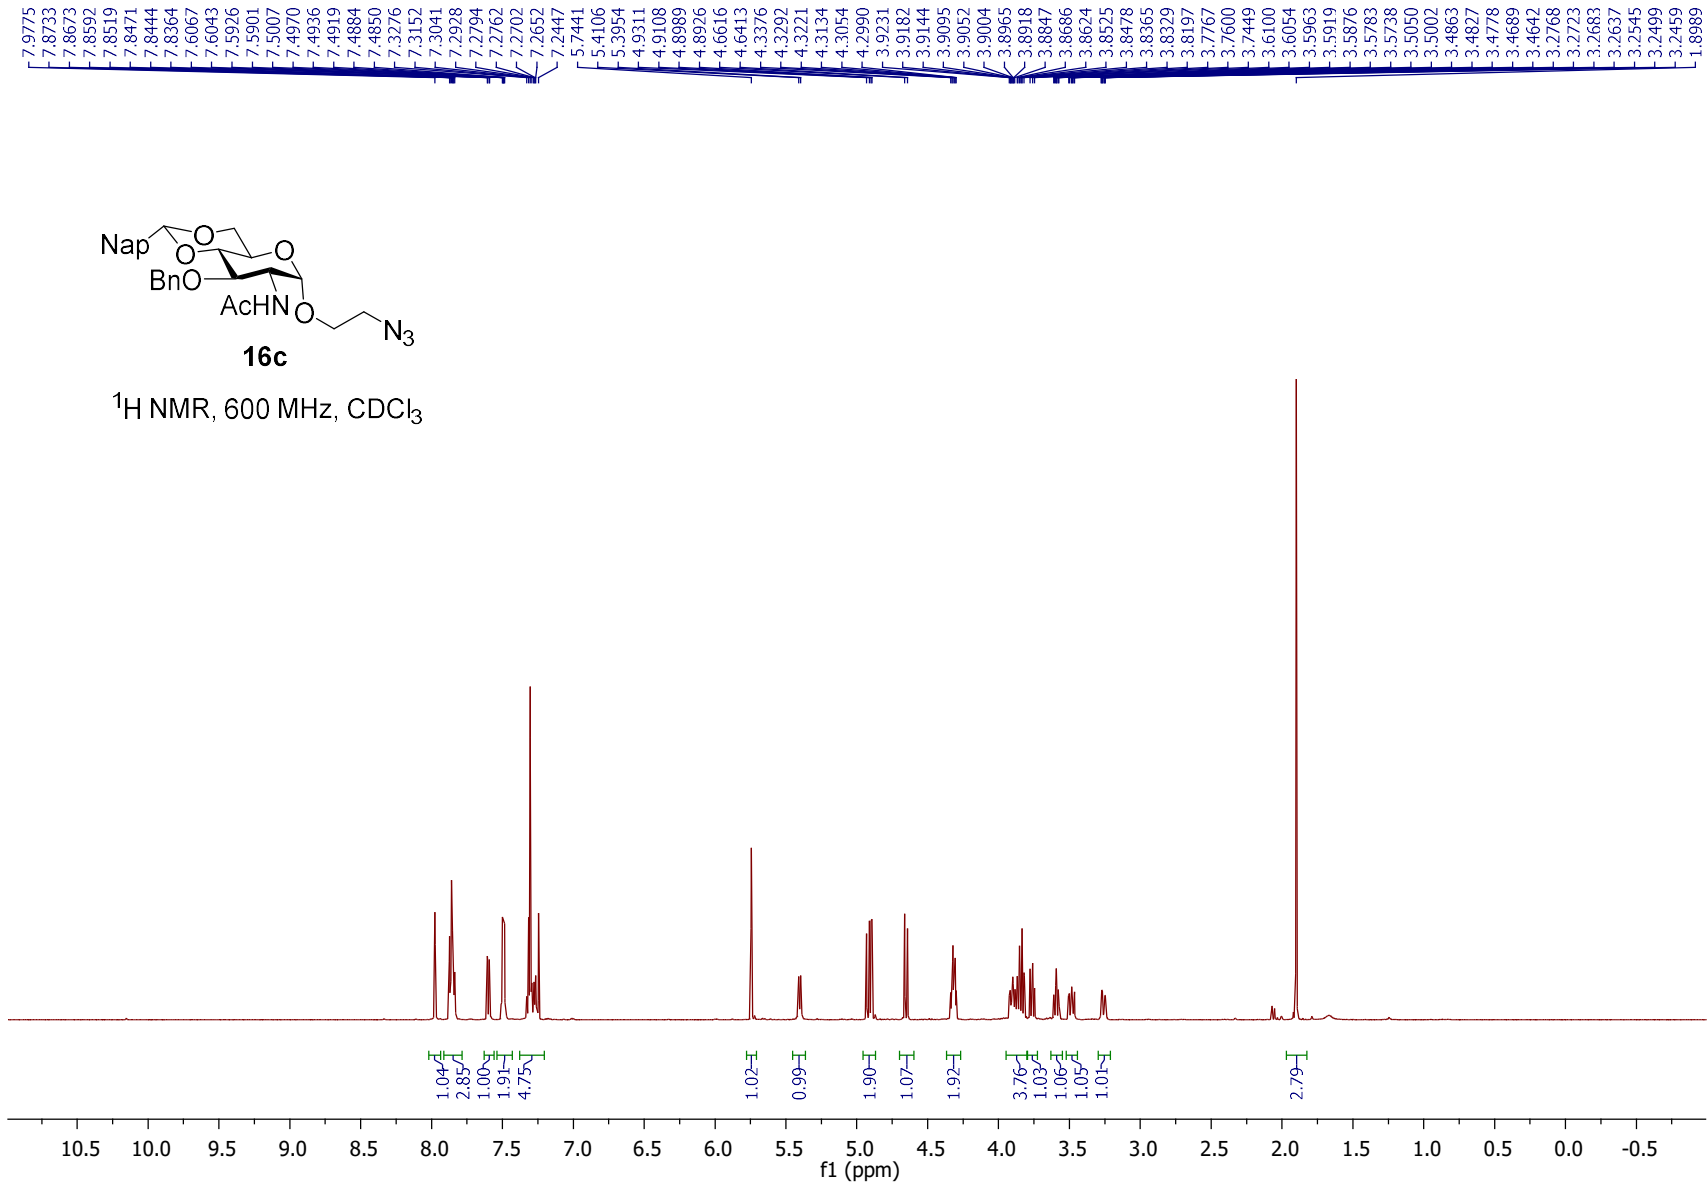

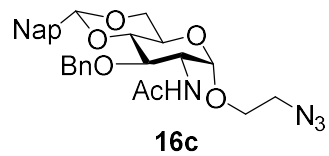

$^{13}\text{C}$  NMR, 150 MHz,  $\text{CDCl}_3$

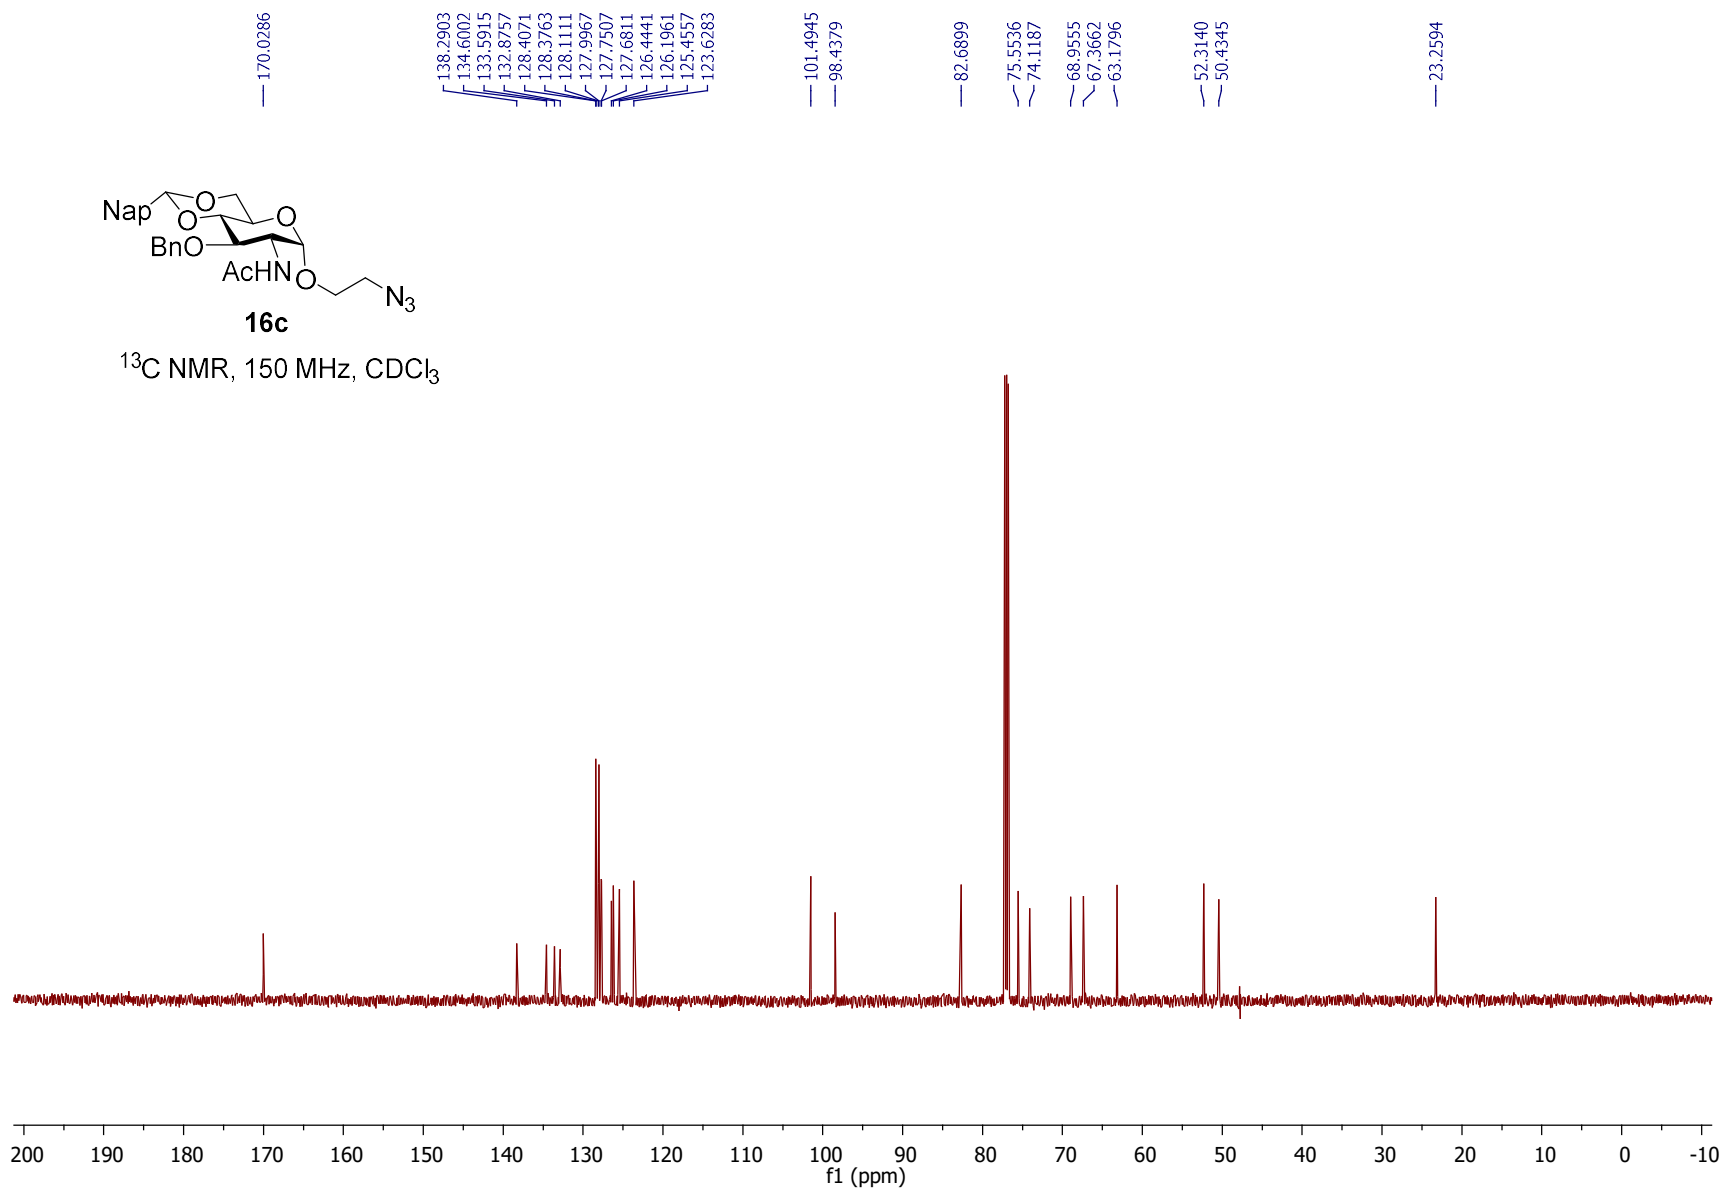

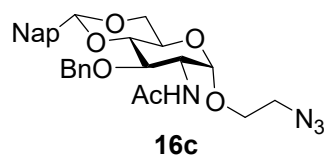

$^1\text{H}$ - $^{13}\text{C}$  HSQC, 600/150MHz,  $\text{CDCl}_3$

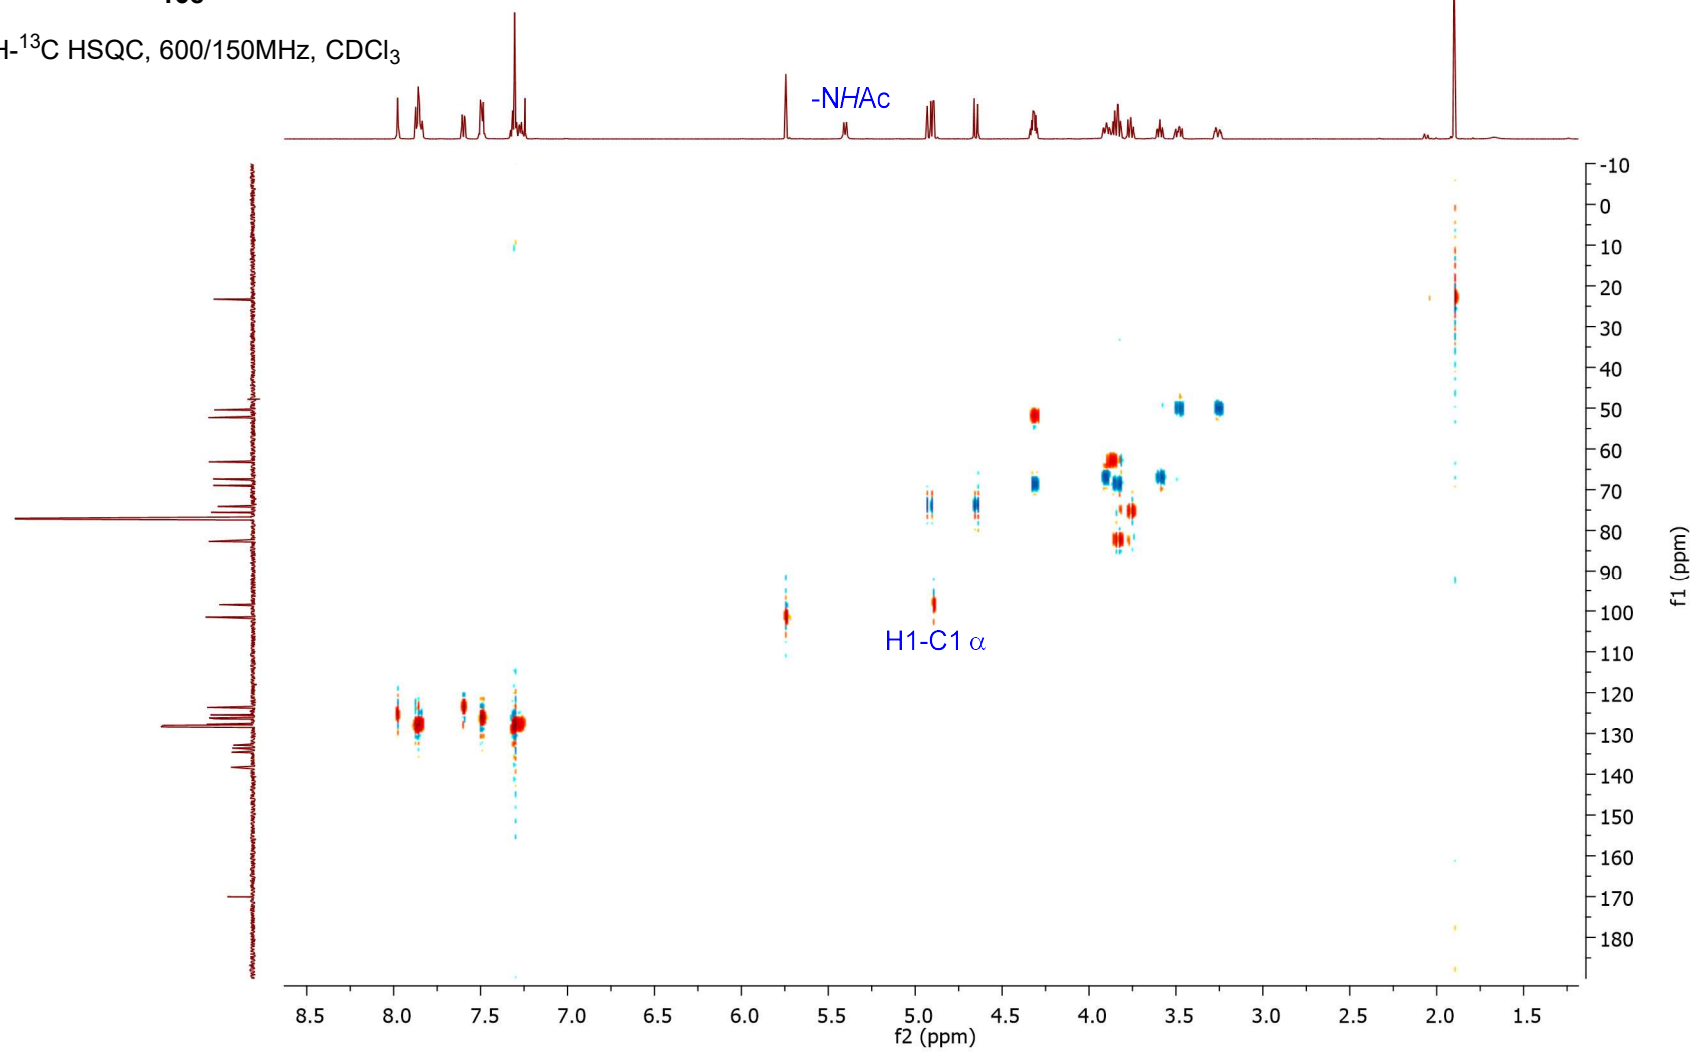



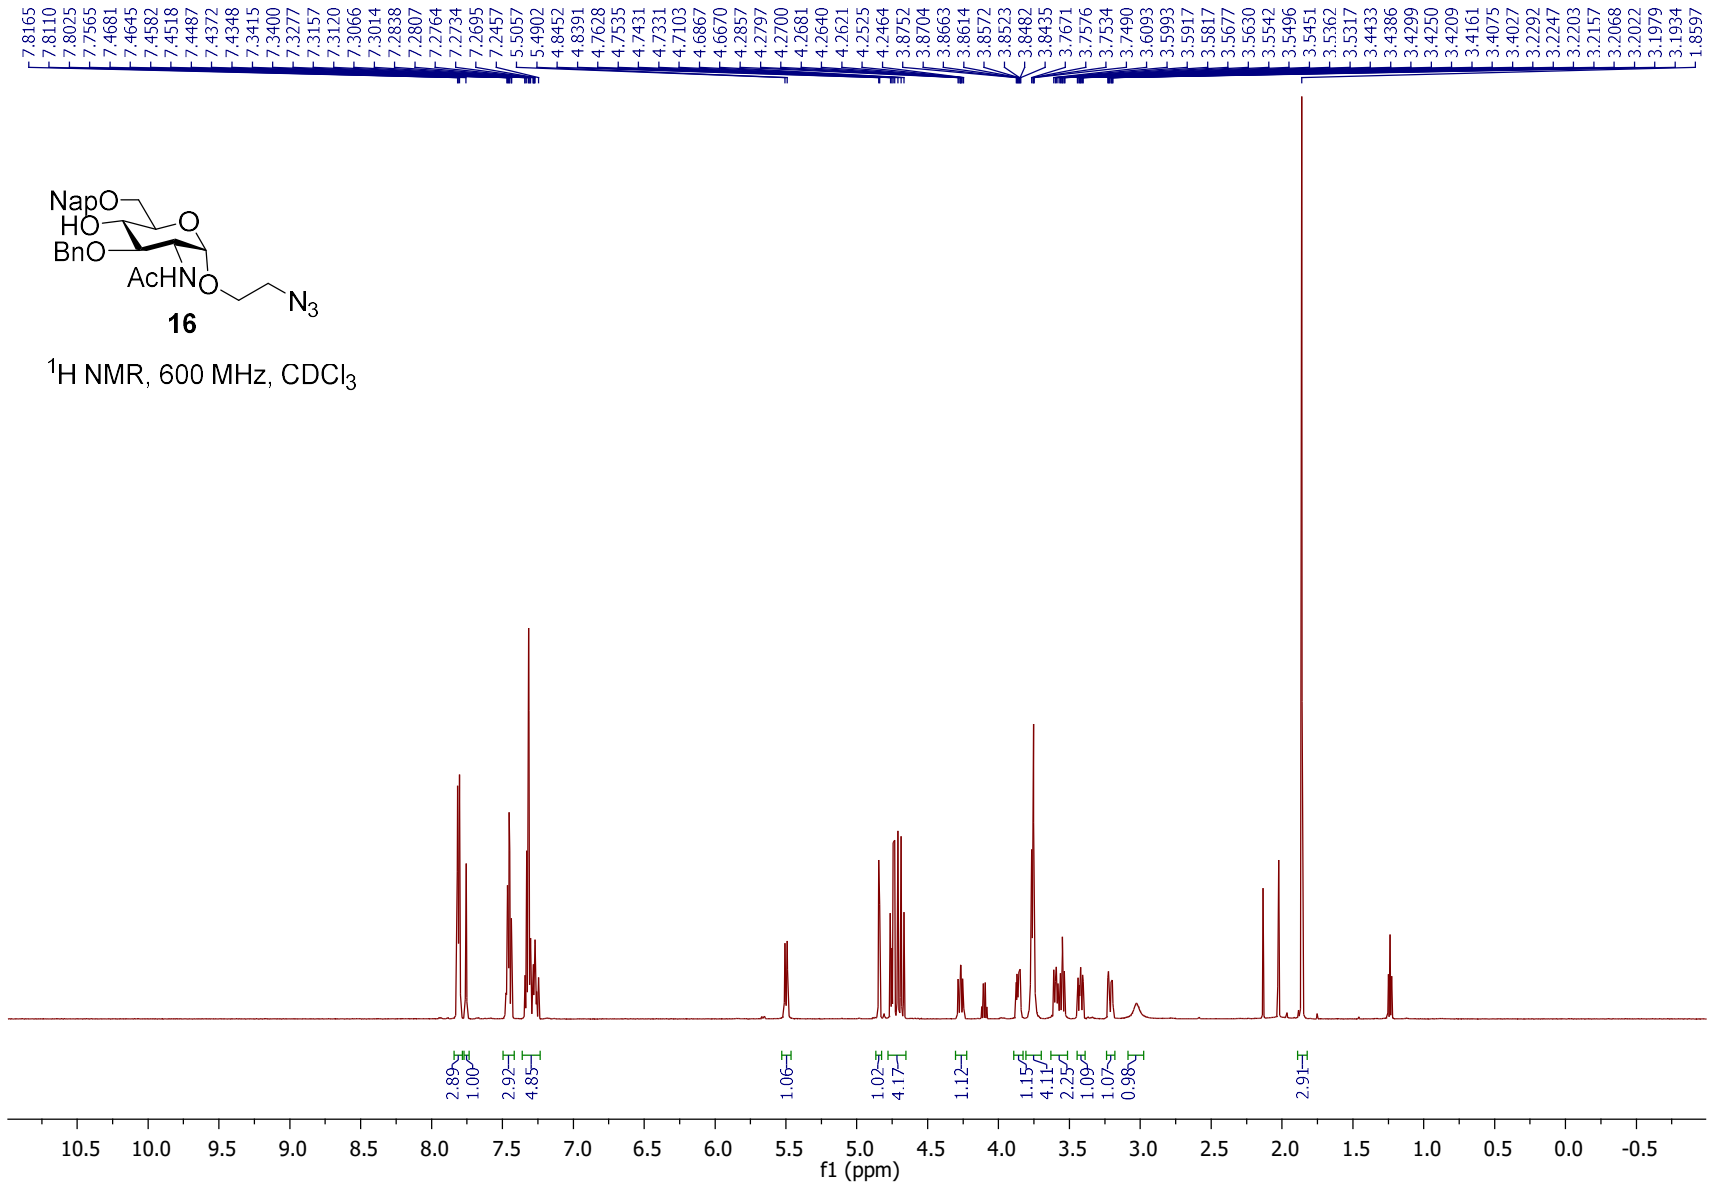

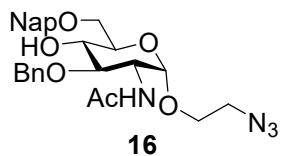

<sup>13</sup>C NMR, 150 MHz, CDCl<sub>3</sub>

170.0982

138.3541  
135.3077  
133.2026  
132.9837  
128.5805  
128.2369  
128.1162  
127.8982  
127.8696  
127.6869  
126.4882  
126.1482  
125.9344  
125.6108

97.9716

79.5785  
74.0105  
73.7709  
71.7261  
70.8444  
70.0386  
67.1657

51.7659  
50.4506

23.2881

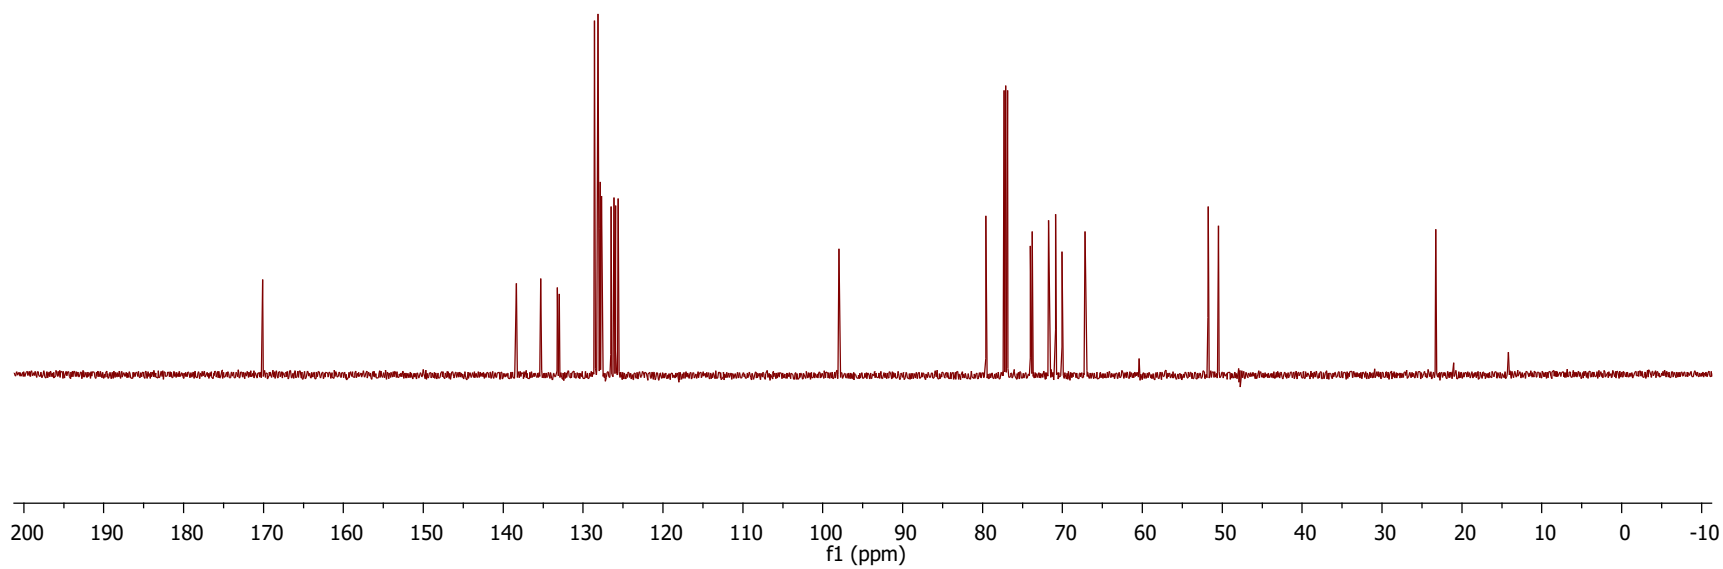

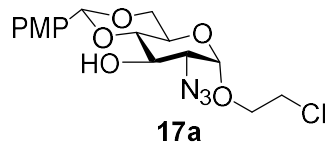

$^1\text{H NMR}$ , 600 MHz,  $\text{CDCl}_3$

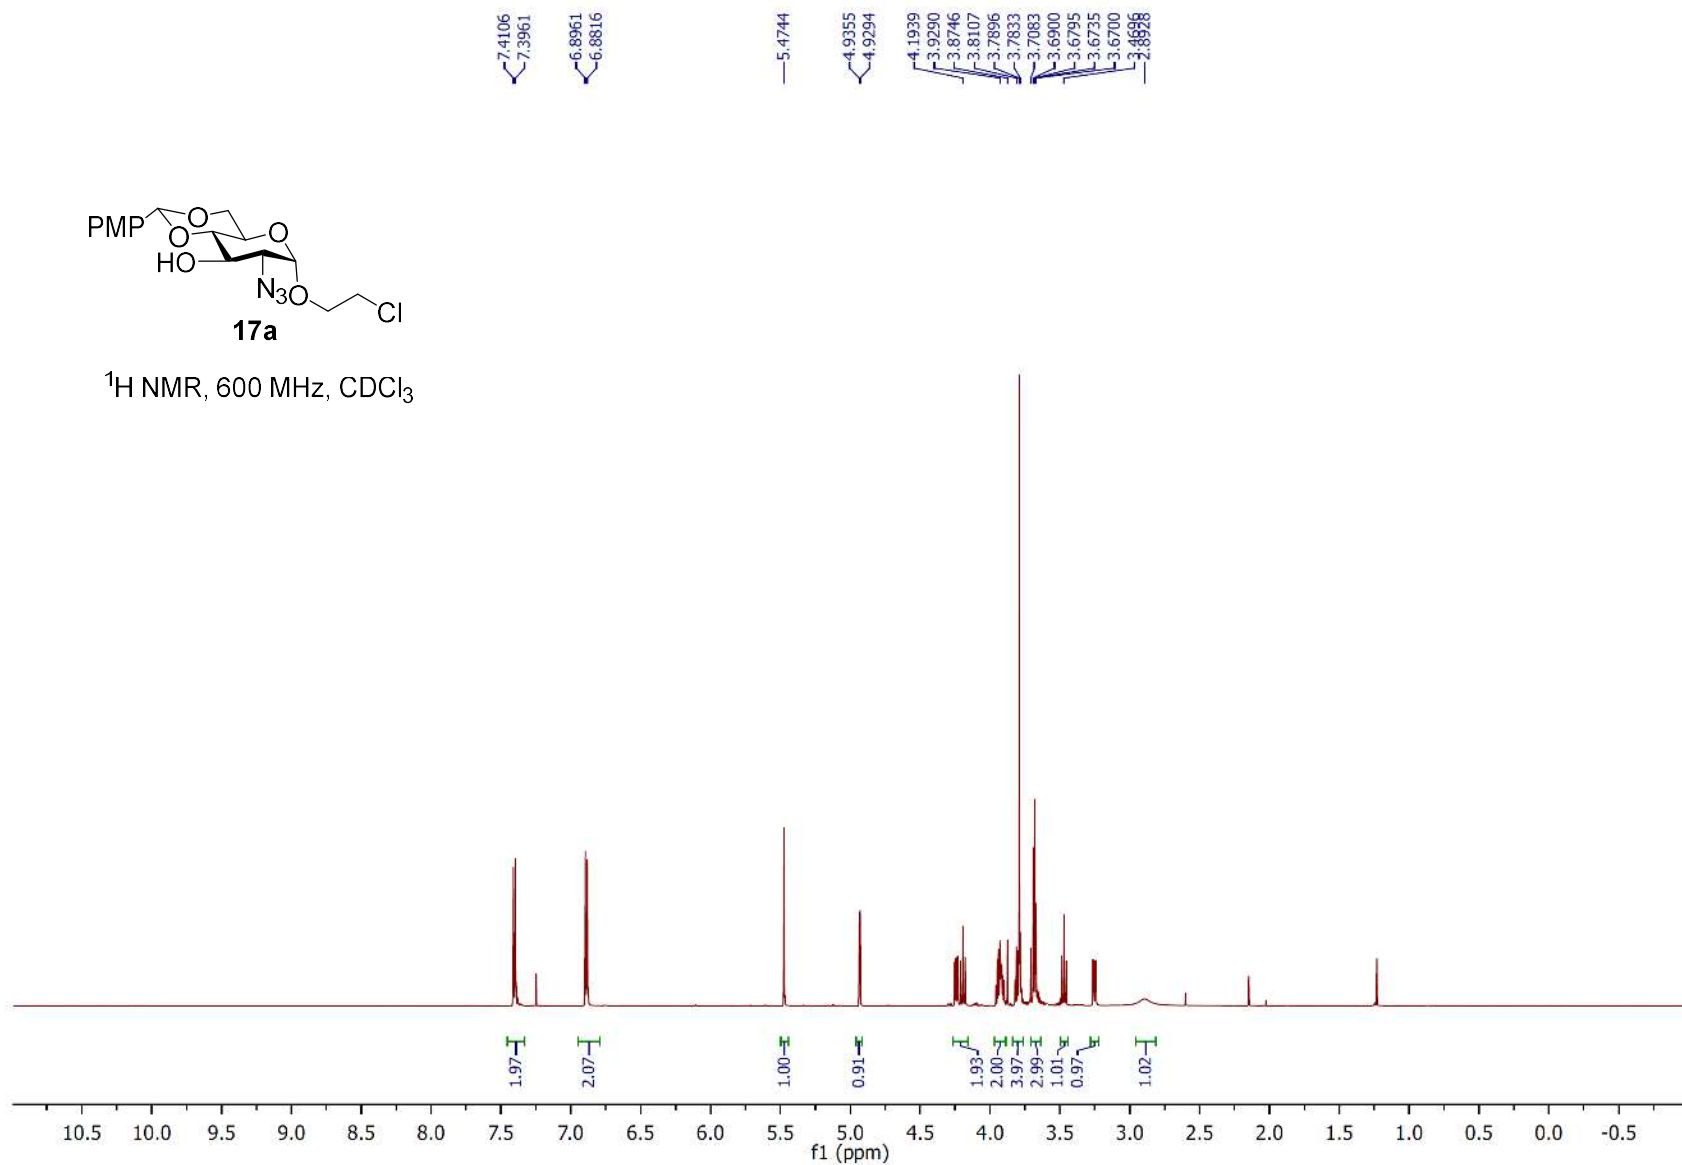

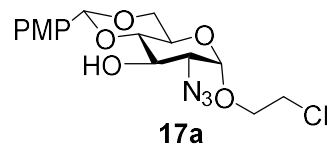

$^{13}\text{C}$  NMR, 150 MHz,  $\text{CDCl}_3$

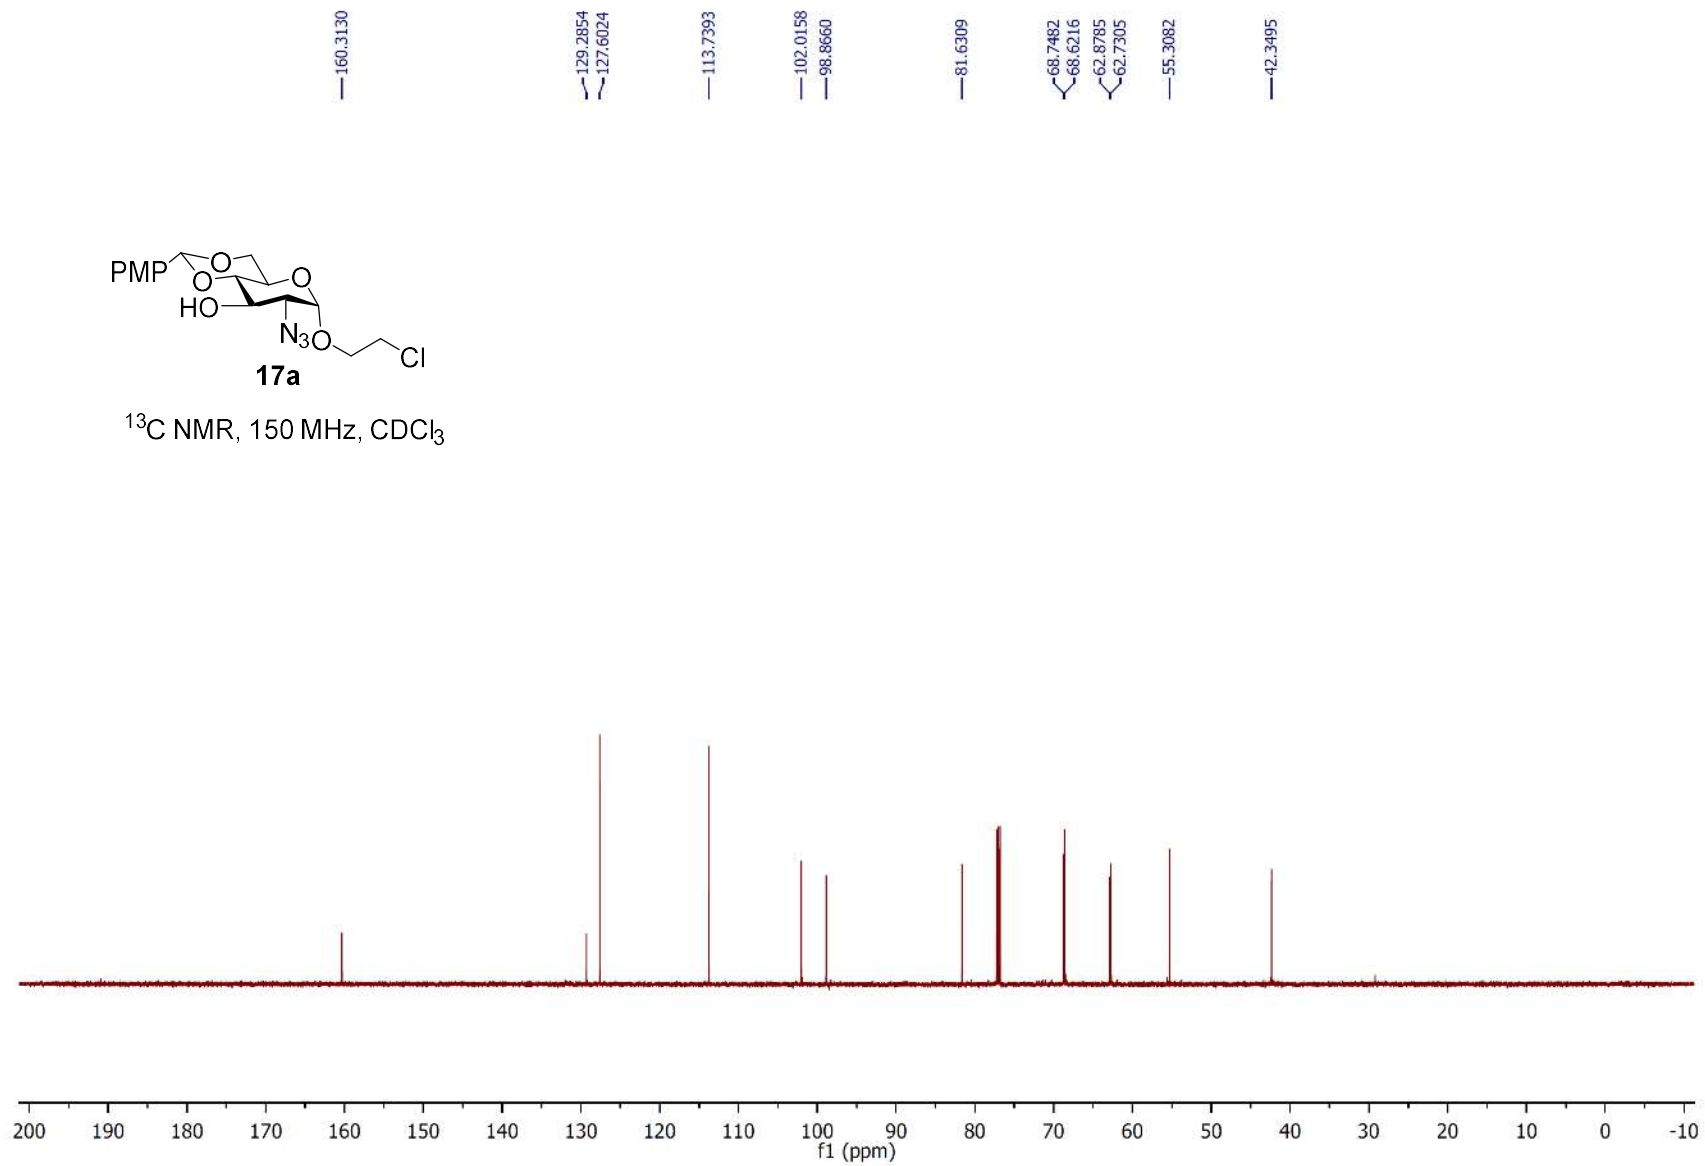

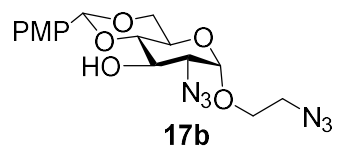

$^1\text{H}$  NMR, 600 MHz,  $\text{CDCl}_3$

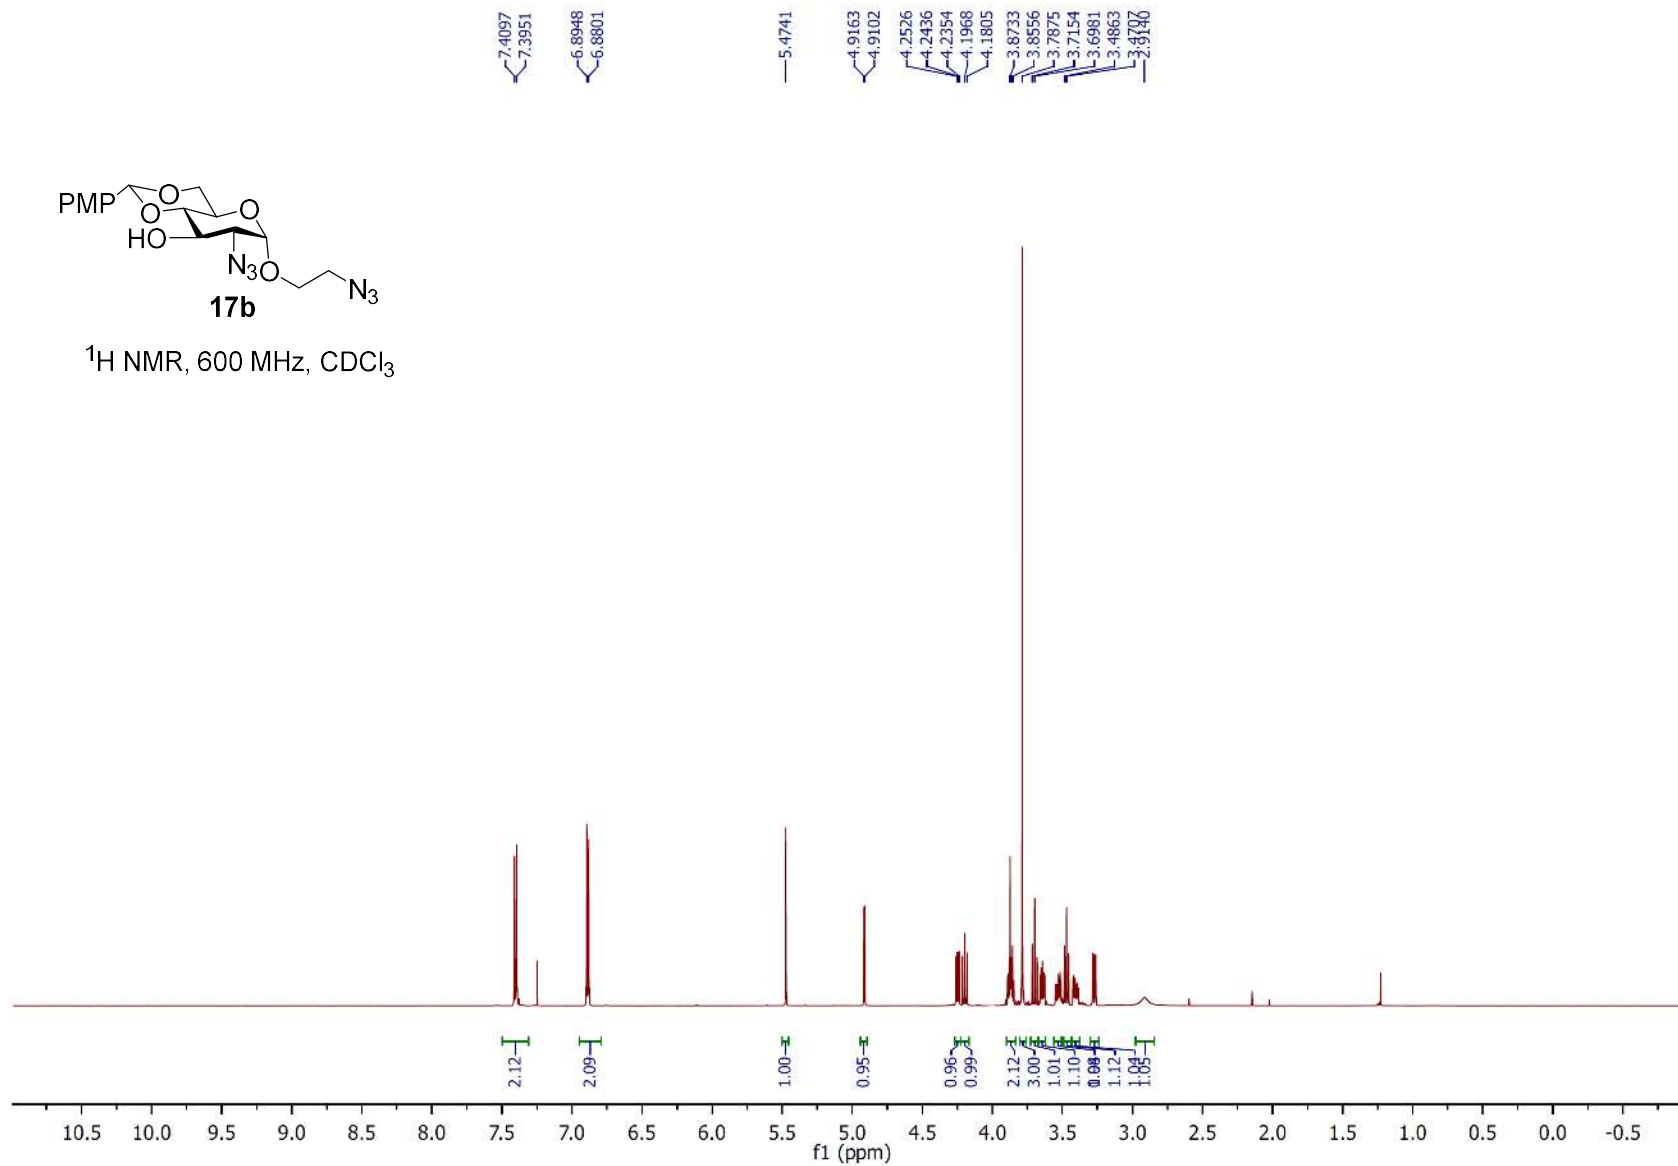

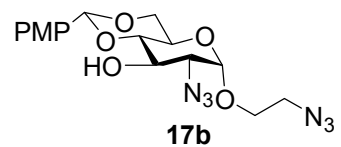

$^{13}\text{C}$  NMR, 150 MHz,  $\text{CDCl}_3$

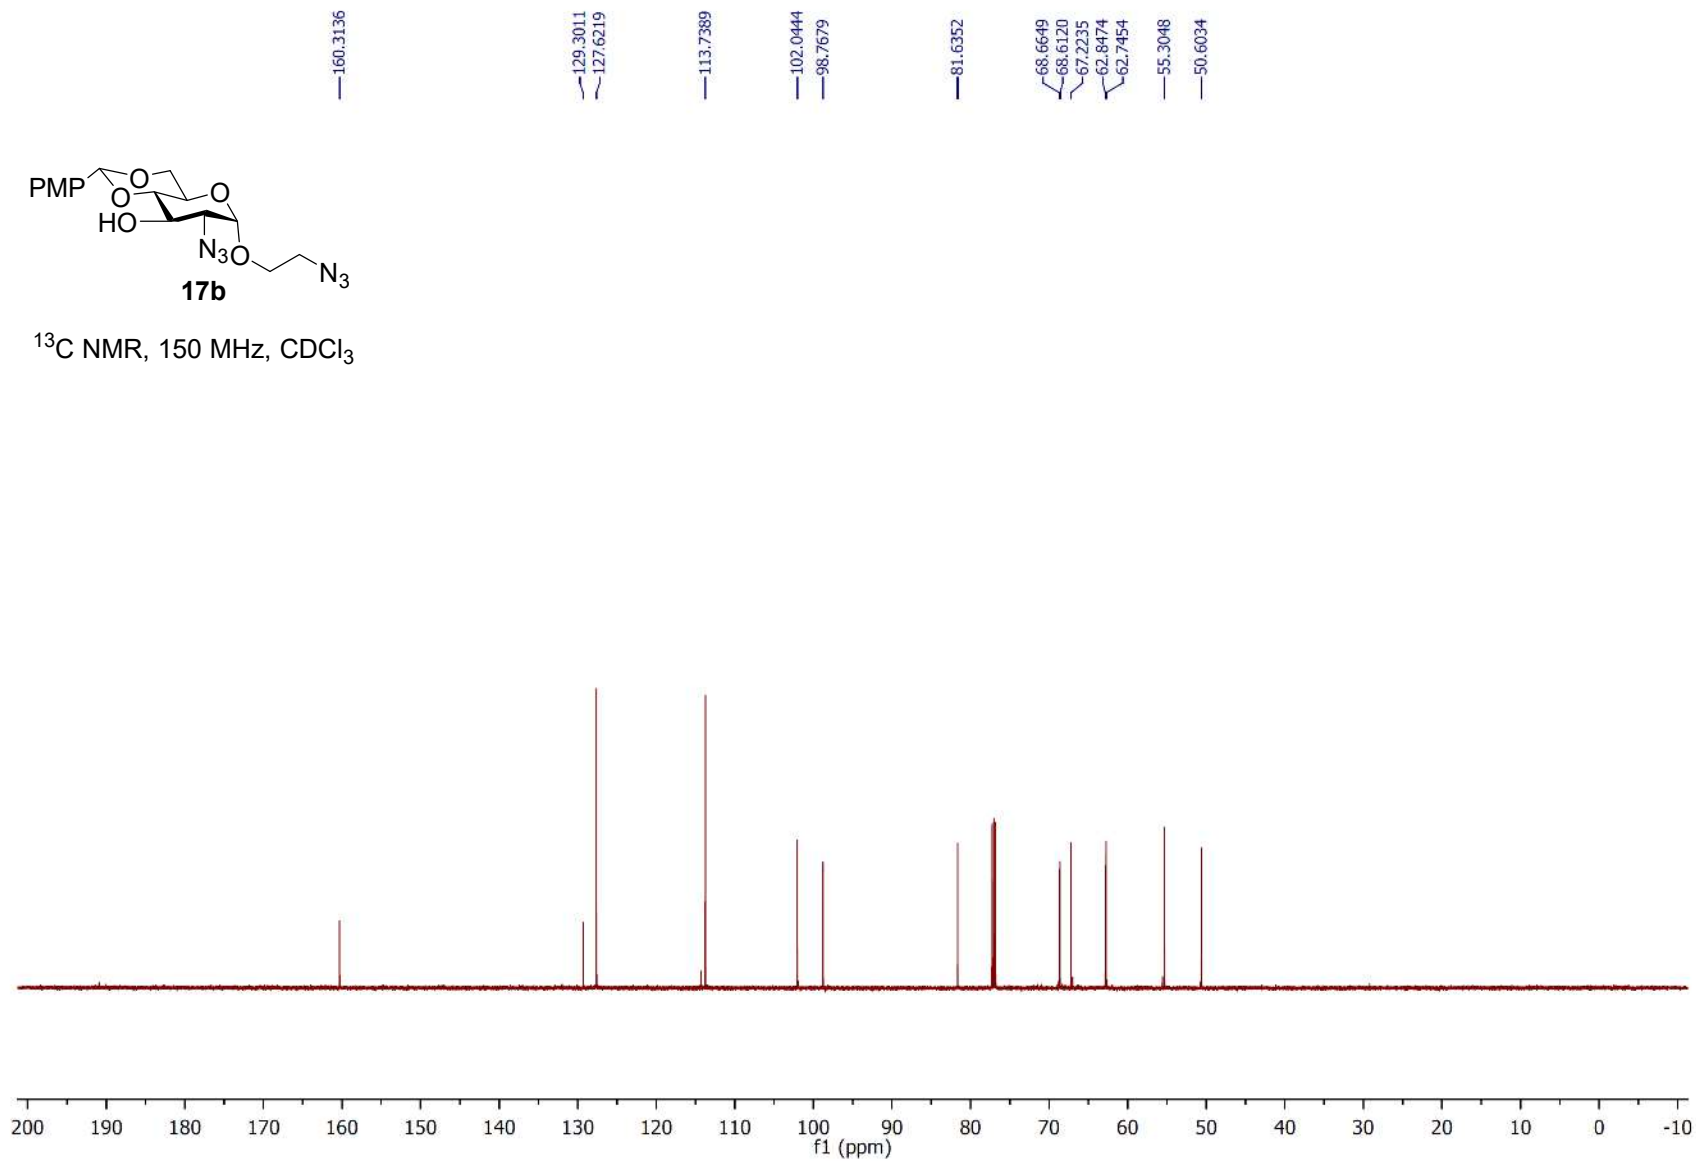

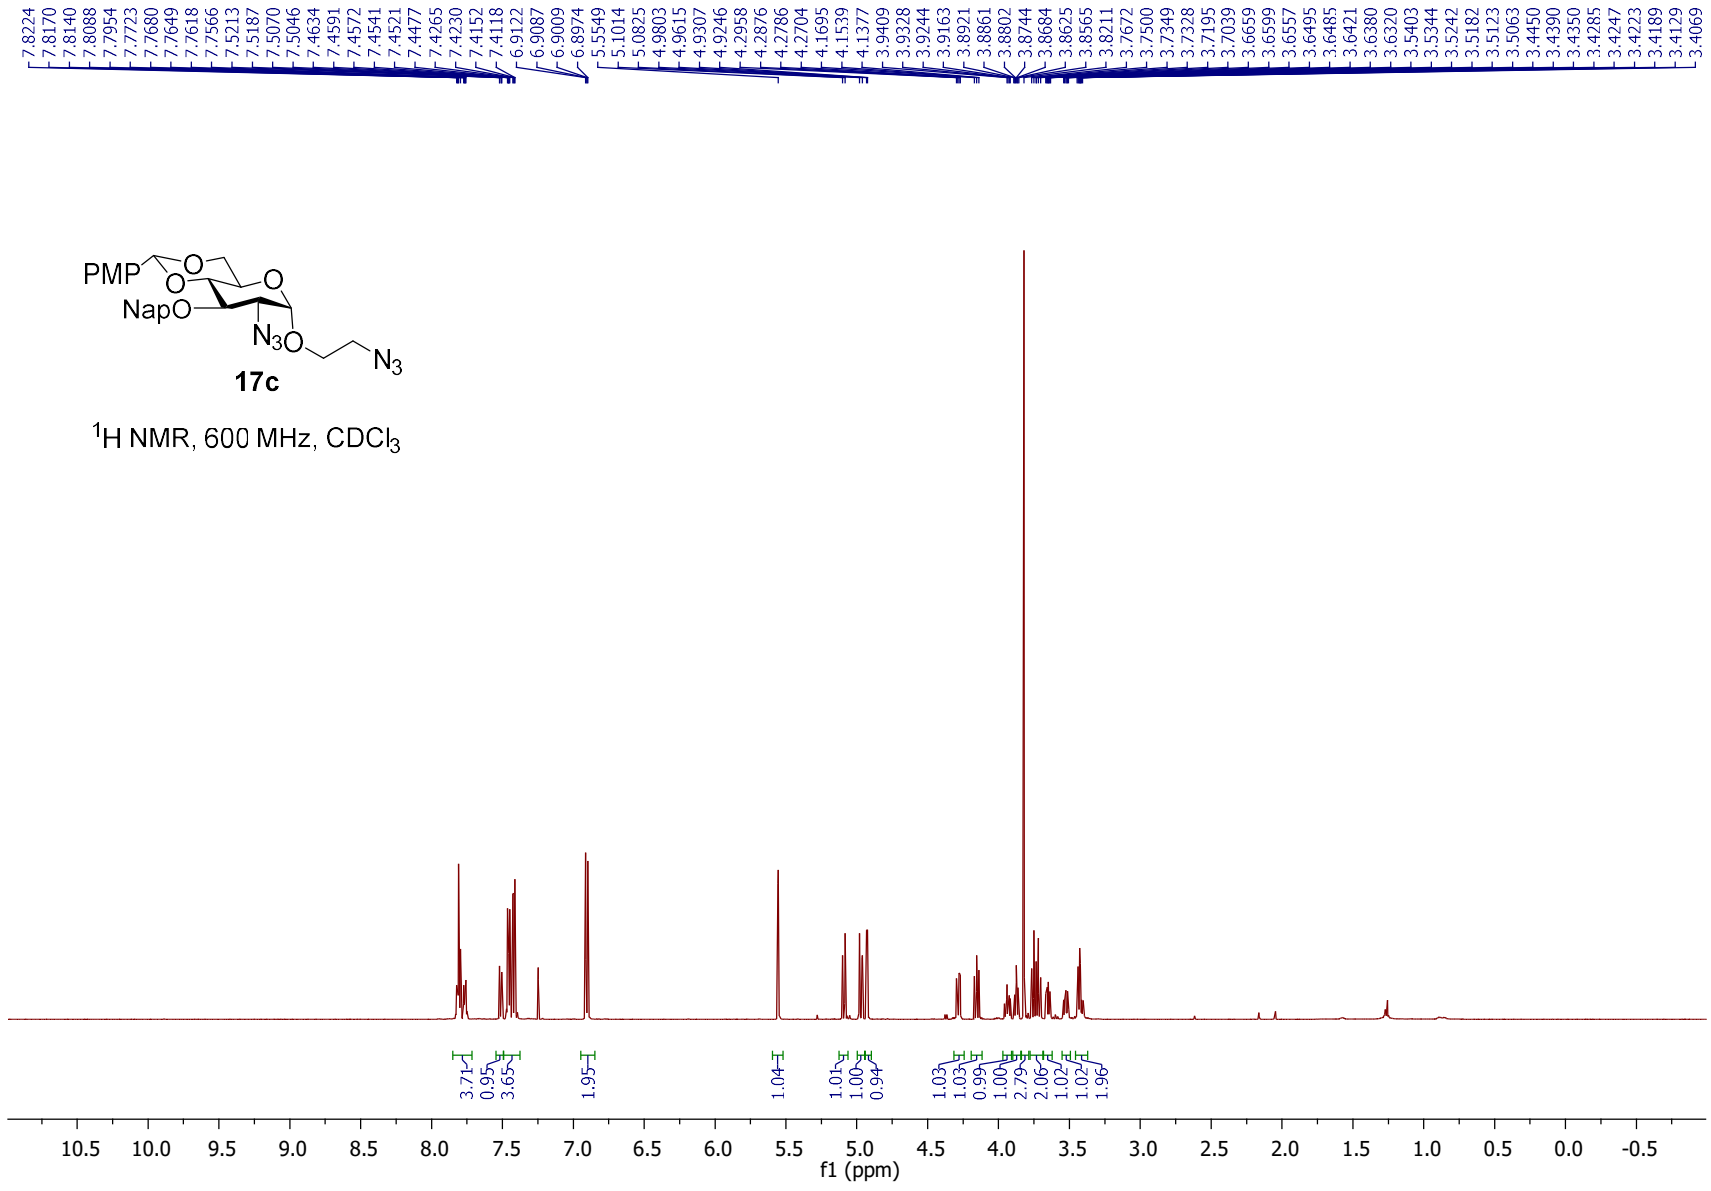

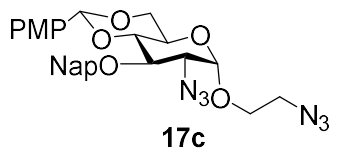

$^{13}\text{C}$  NMR, 150 MHz,  $\text{CDCl}_3$

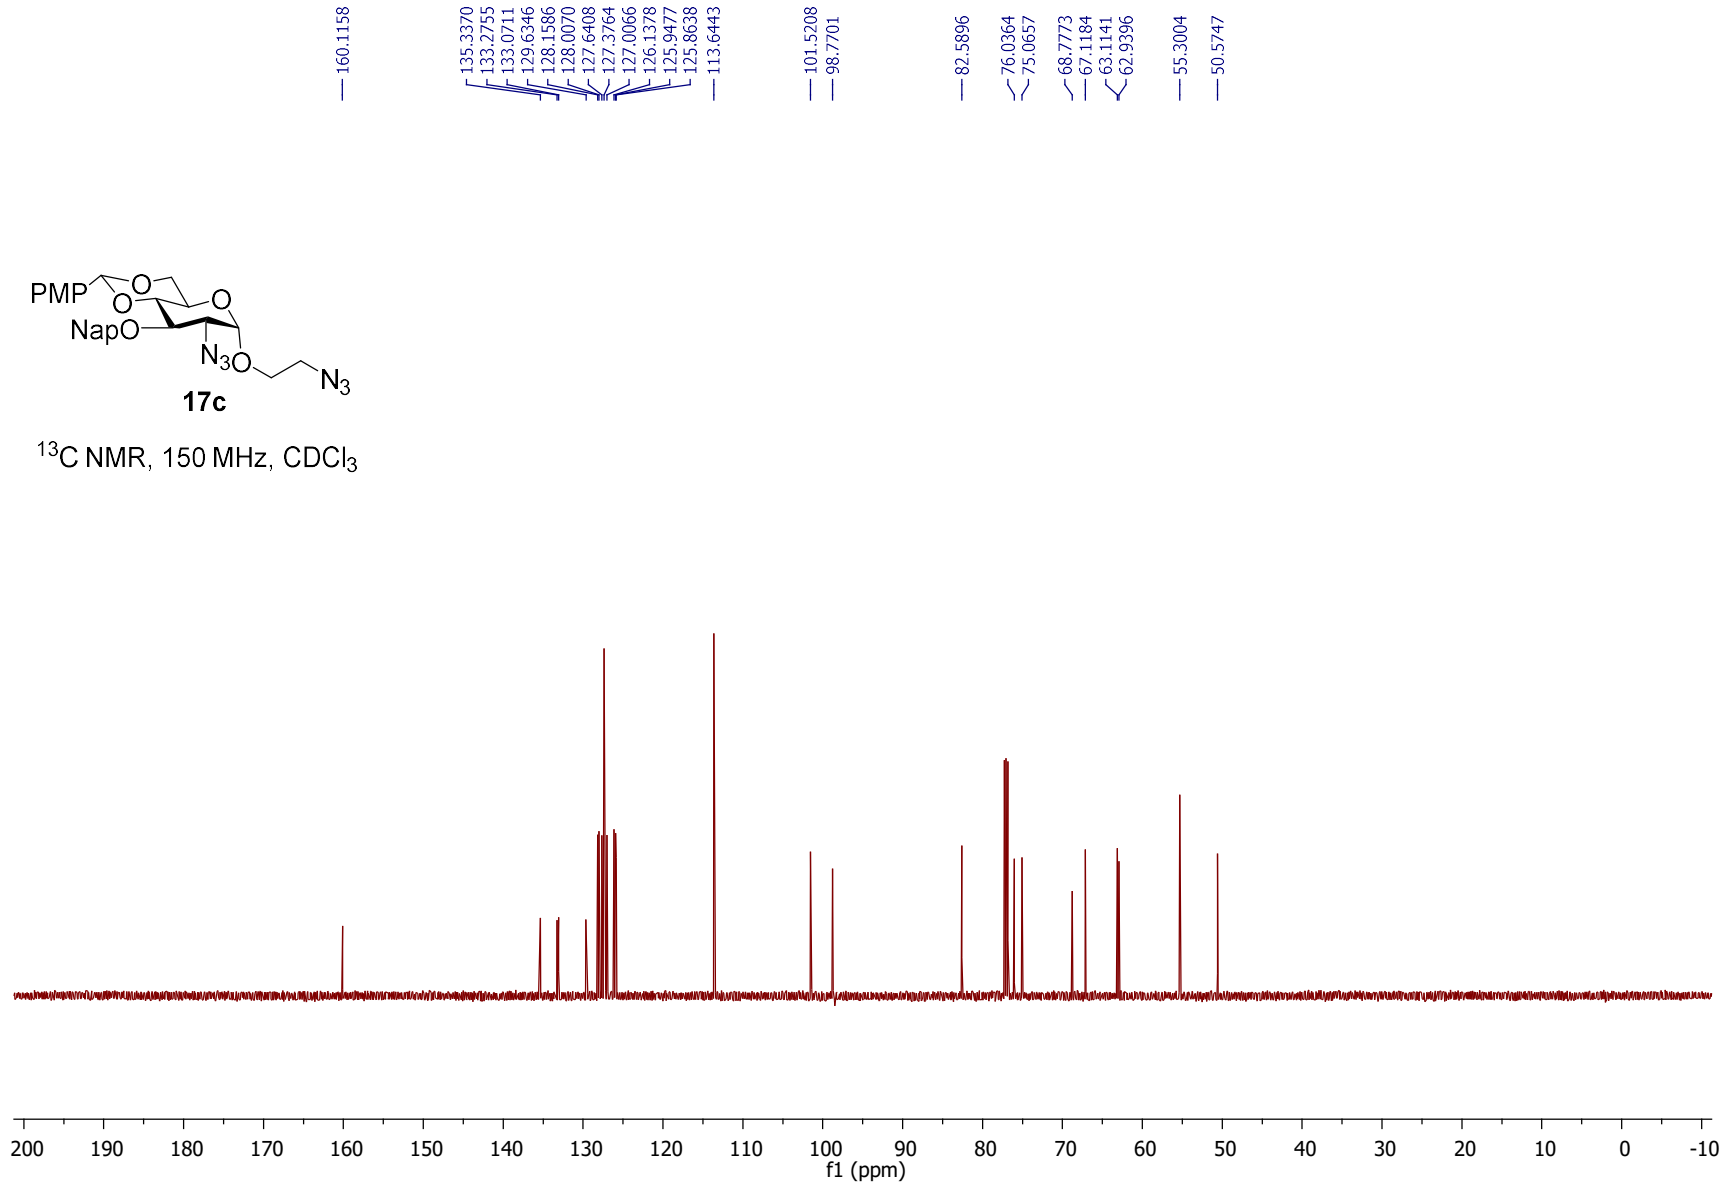



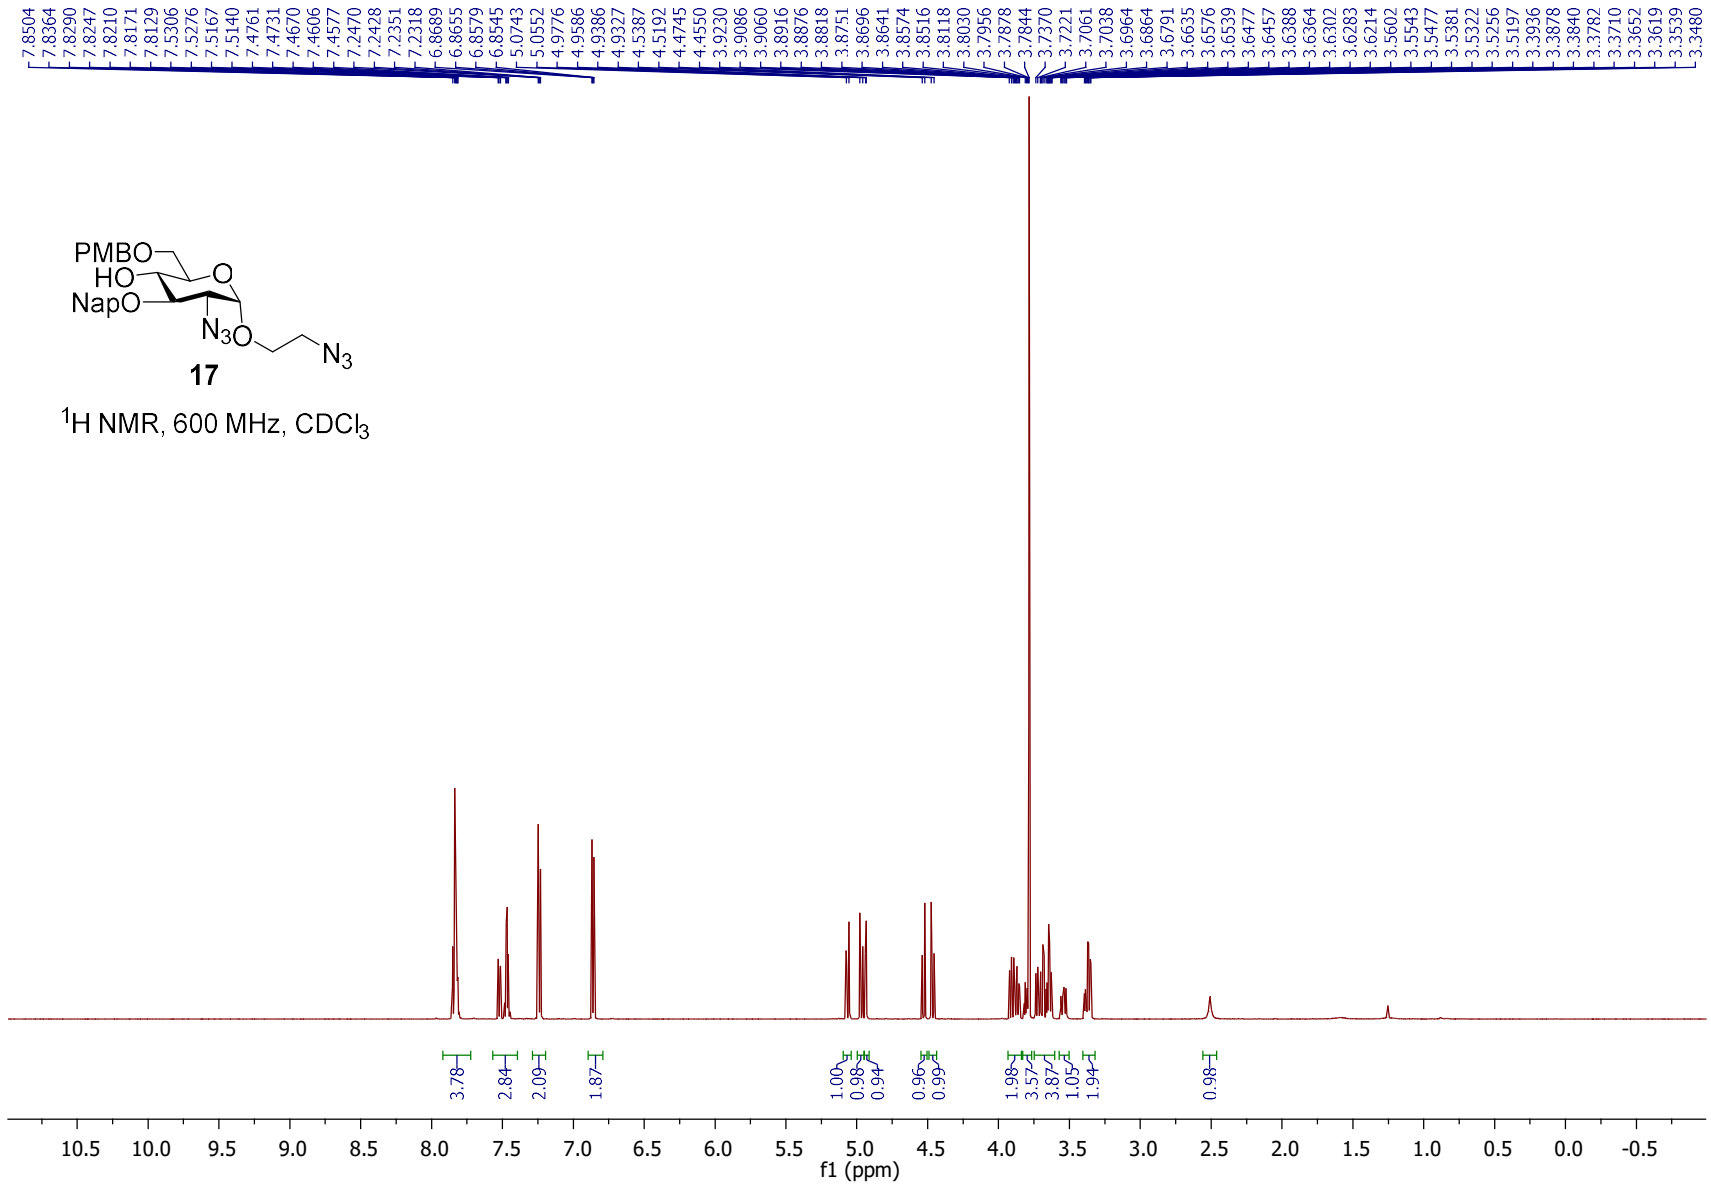

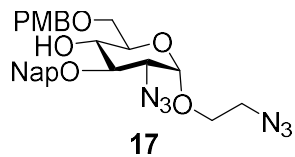

$^{13}\text{C}$  NMR, 150 MHz,  $\text{CDCl}_3$

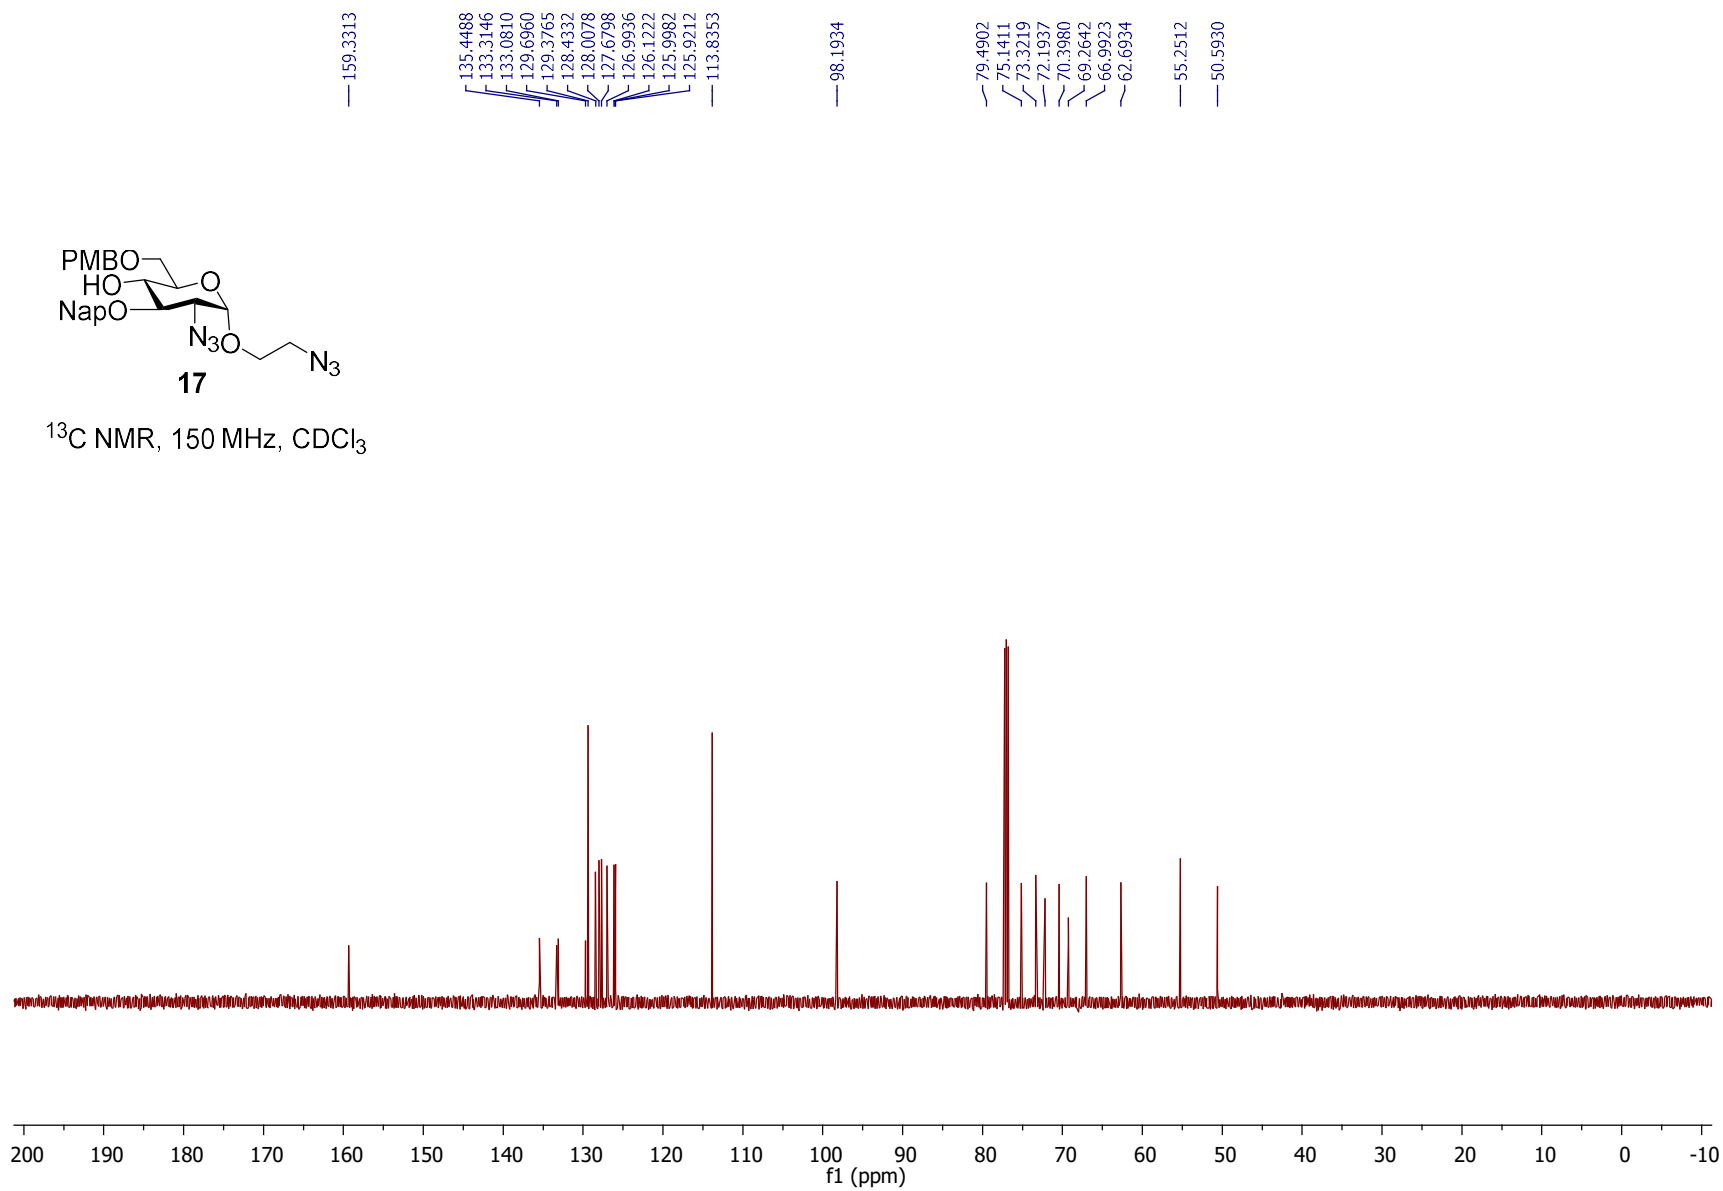

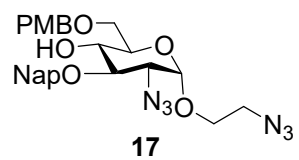

$^1\text{H}$ - $^1\text{H}$  COSY, 600 MHz,  $\text{CDCl}_3$

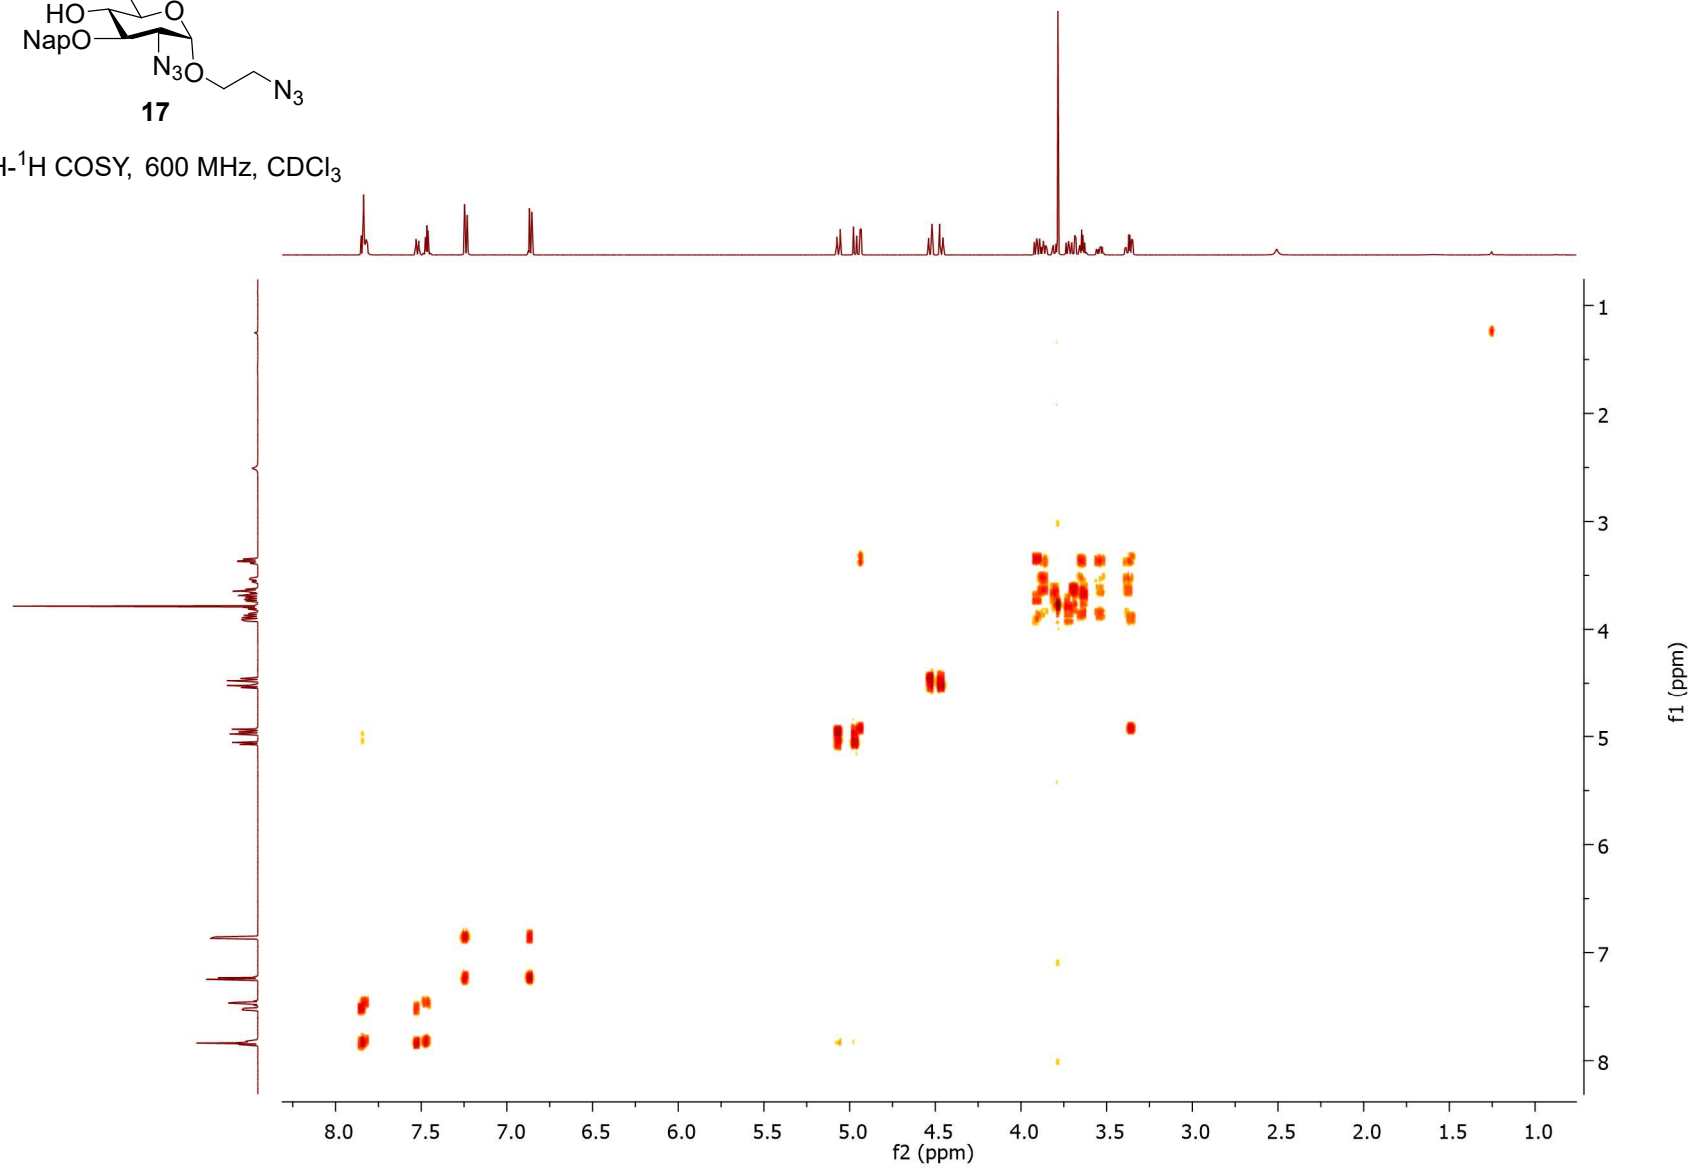

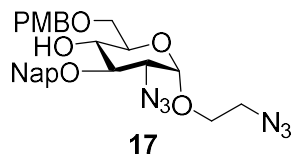

$^1\text{H}$ - $^{13}\text{C}$  HSQC, 600/150MHz,  $\text{CDCl}_3$

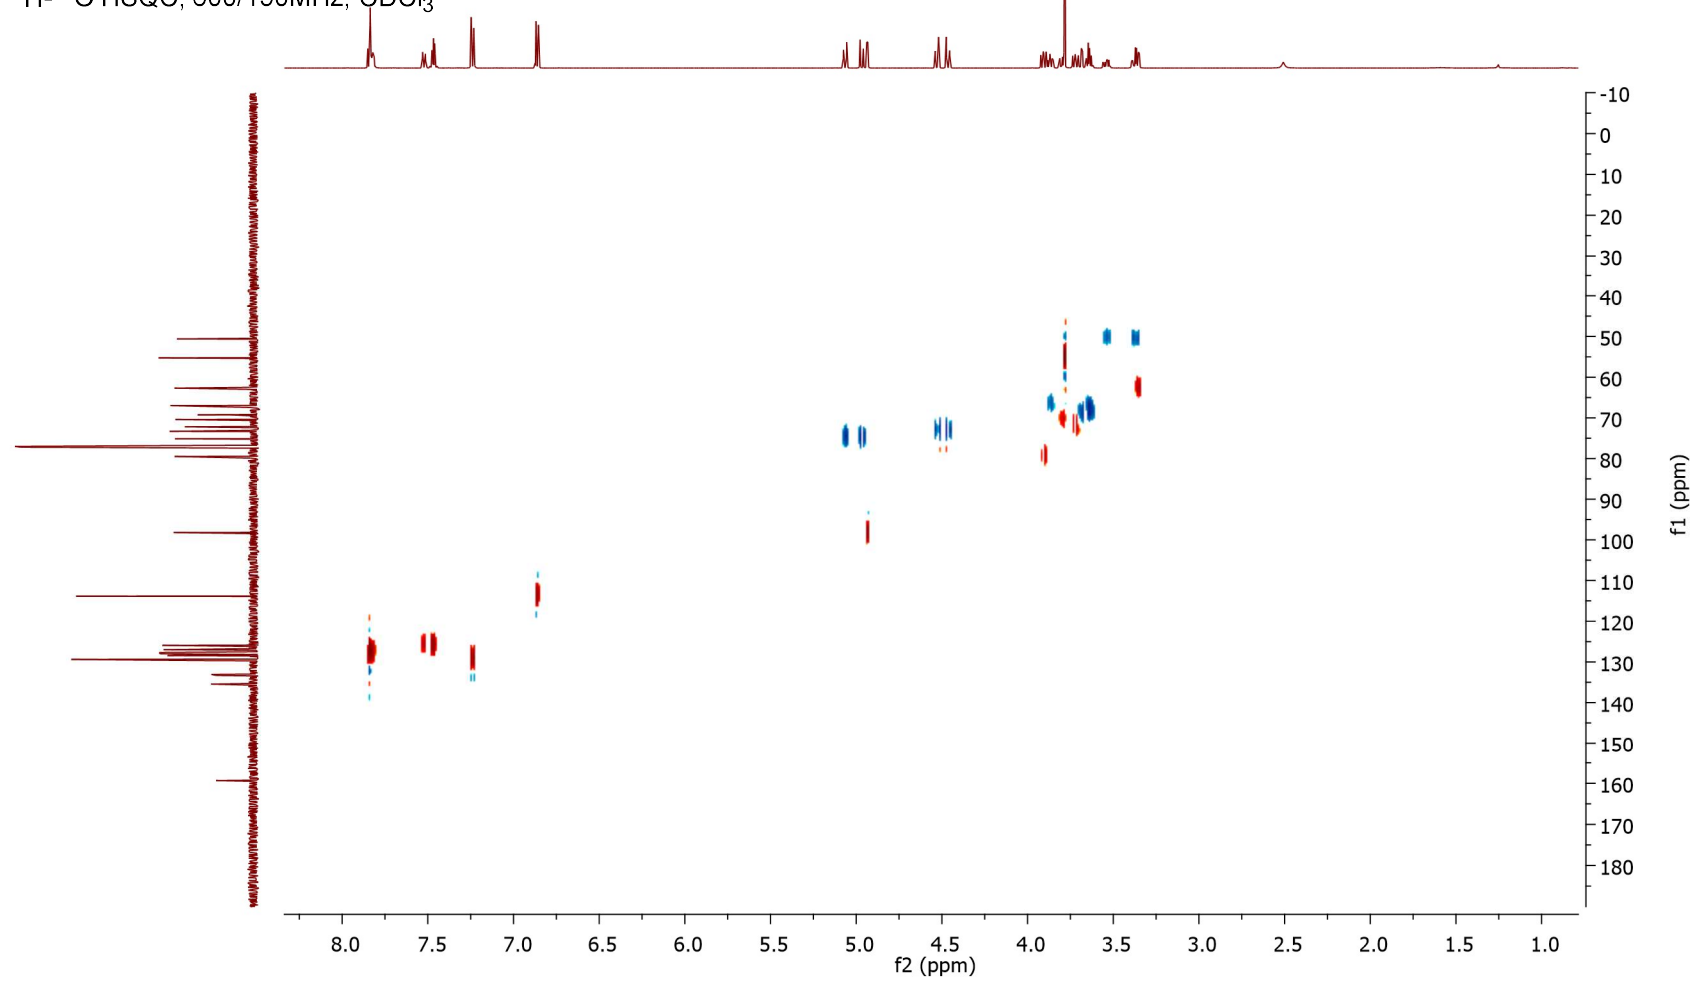

7.8683  
7.8544  
7.8379  
7.8252  
7.8085  
7.7941  
7.4869  
7.4728  
7.4603  
7.4425  
7.4313  
7.4220  
7.4134  
7.4010  
7.3876  
7.3807  
7.3669  
7.3543  
7.3407  
7.3287  
7.3159  
7.2982  
7.2860  
7.2741  
7.2600  
7.2468  
7.1640  
7.1522  
5.4048  
4.9601  
4.9410  
4.9230  
4.9180  
4.8465  
4.8316  
4.8176  
4.6929  
4.6753  
4.6112  
4.5913  
4.5294  
4.5091  
4.2842  
4.2707  
4.2227  
4.2028  
4.1137  
4.1057  
4.0963  
4.0881  
4.0065  
3.9906  
3.9751  
3.8699  
3.8533  
3.8367  
3.8259  
3.8138  
3.7313  
3.7150  
3.6750  
3.6653  
3.6553  
3.6472  
3.6285  
3.5334  
3.5181  
3.5028  
3.4437  
3.4354  
3.4214  
3.4159  
3.4042  
3.3985  
3.3246  
3.3075  
3.2903  
3.0794  
3.0714  
2.9828  
2.9673  
2.9519  
1.8507

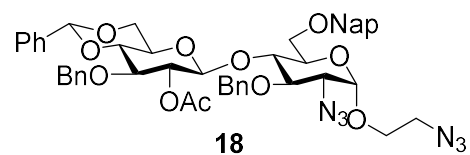

$^1\text{H NMR}$ , 600 MHz,  $\text{CDCl}_3$

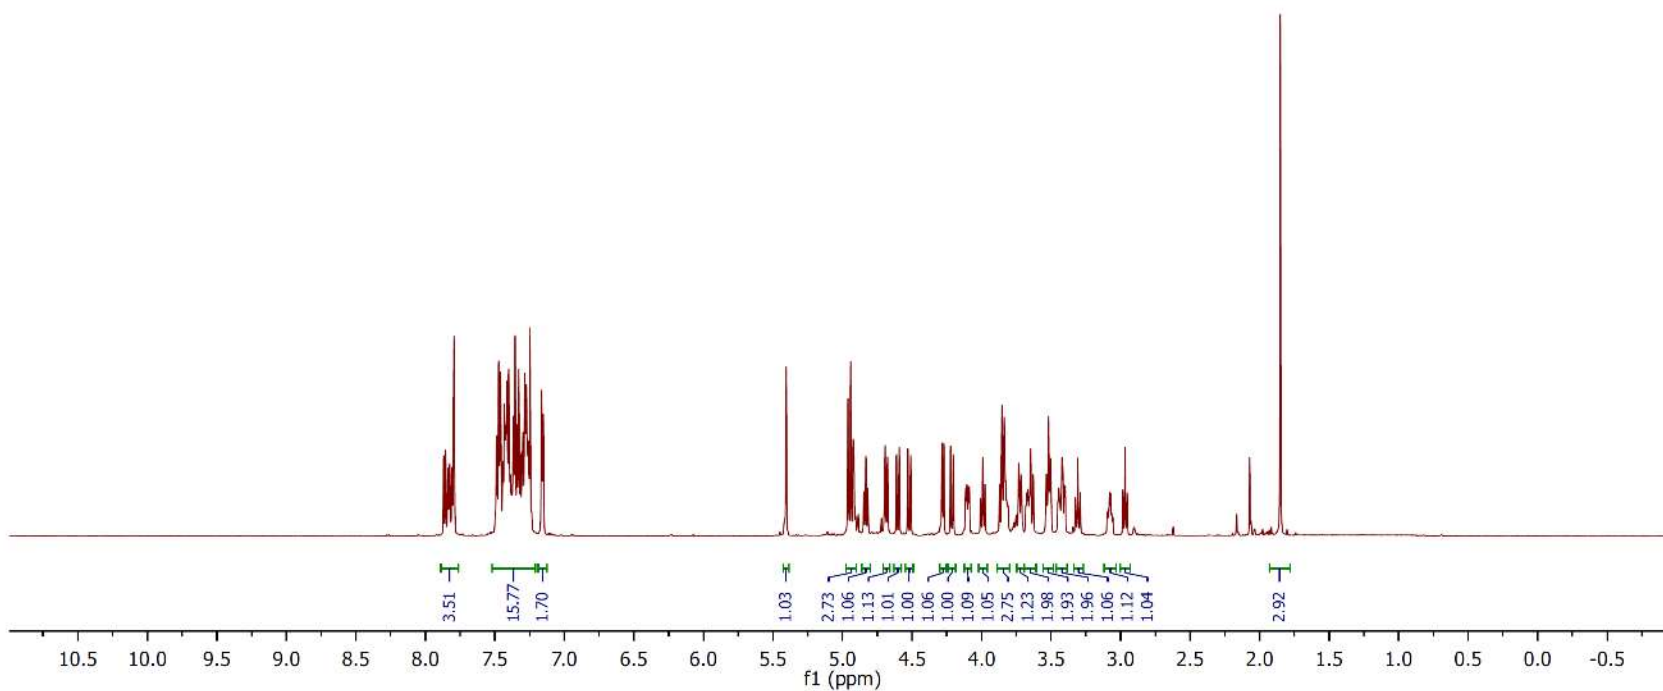

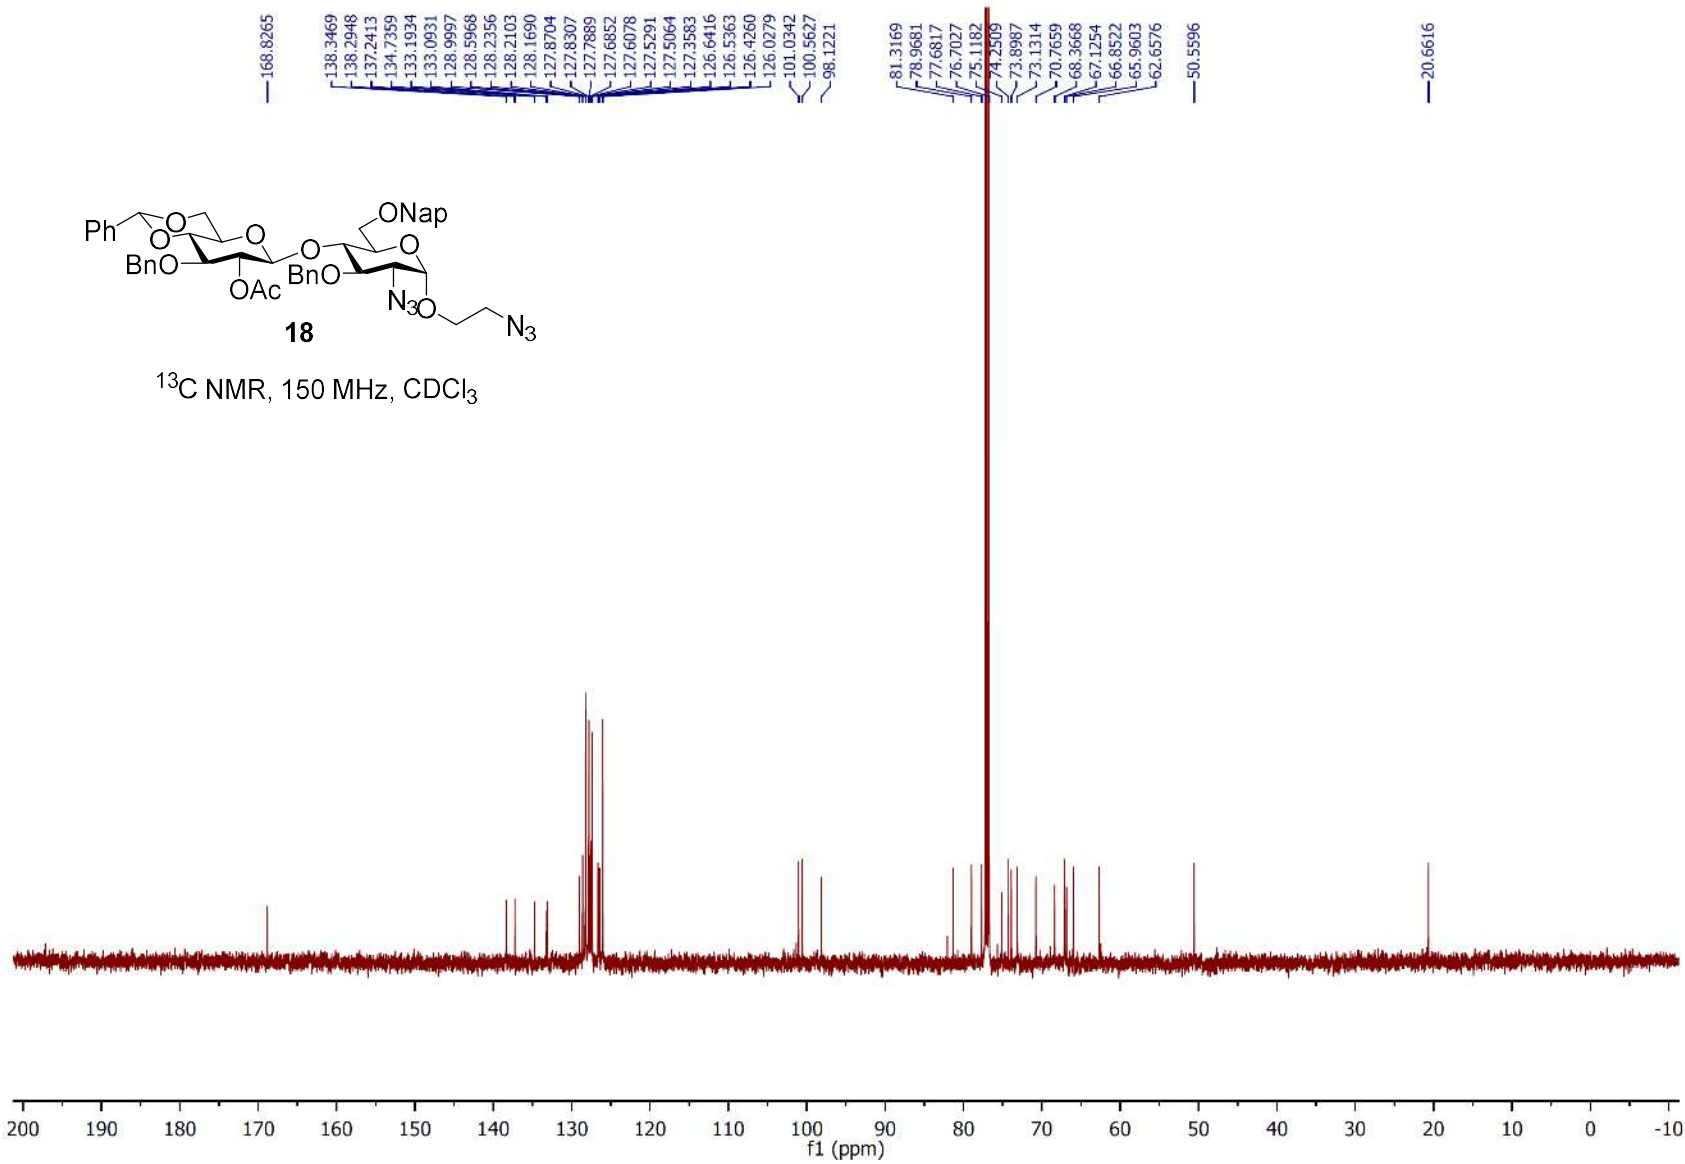

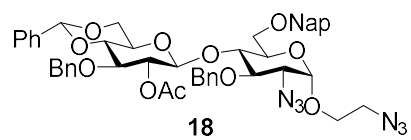

$^1\text{H}$ - $^{13}\text{C}$  HSQC, 600/150MHz,  $\text{CDCl}_3$

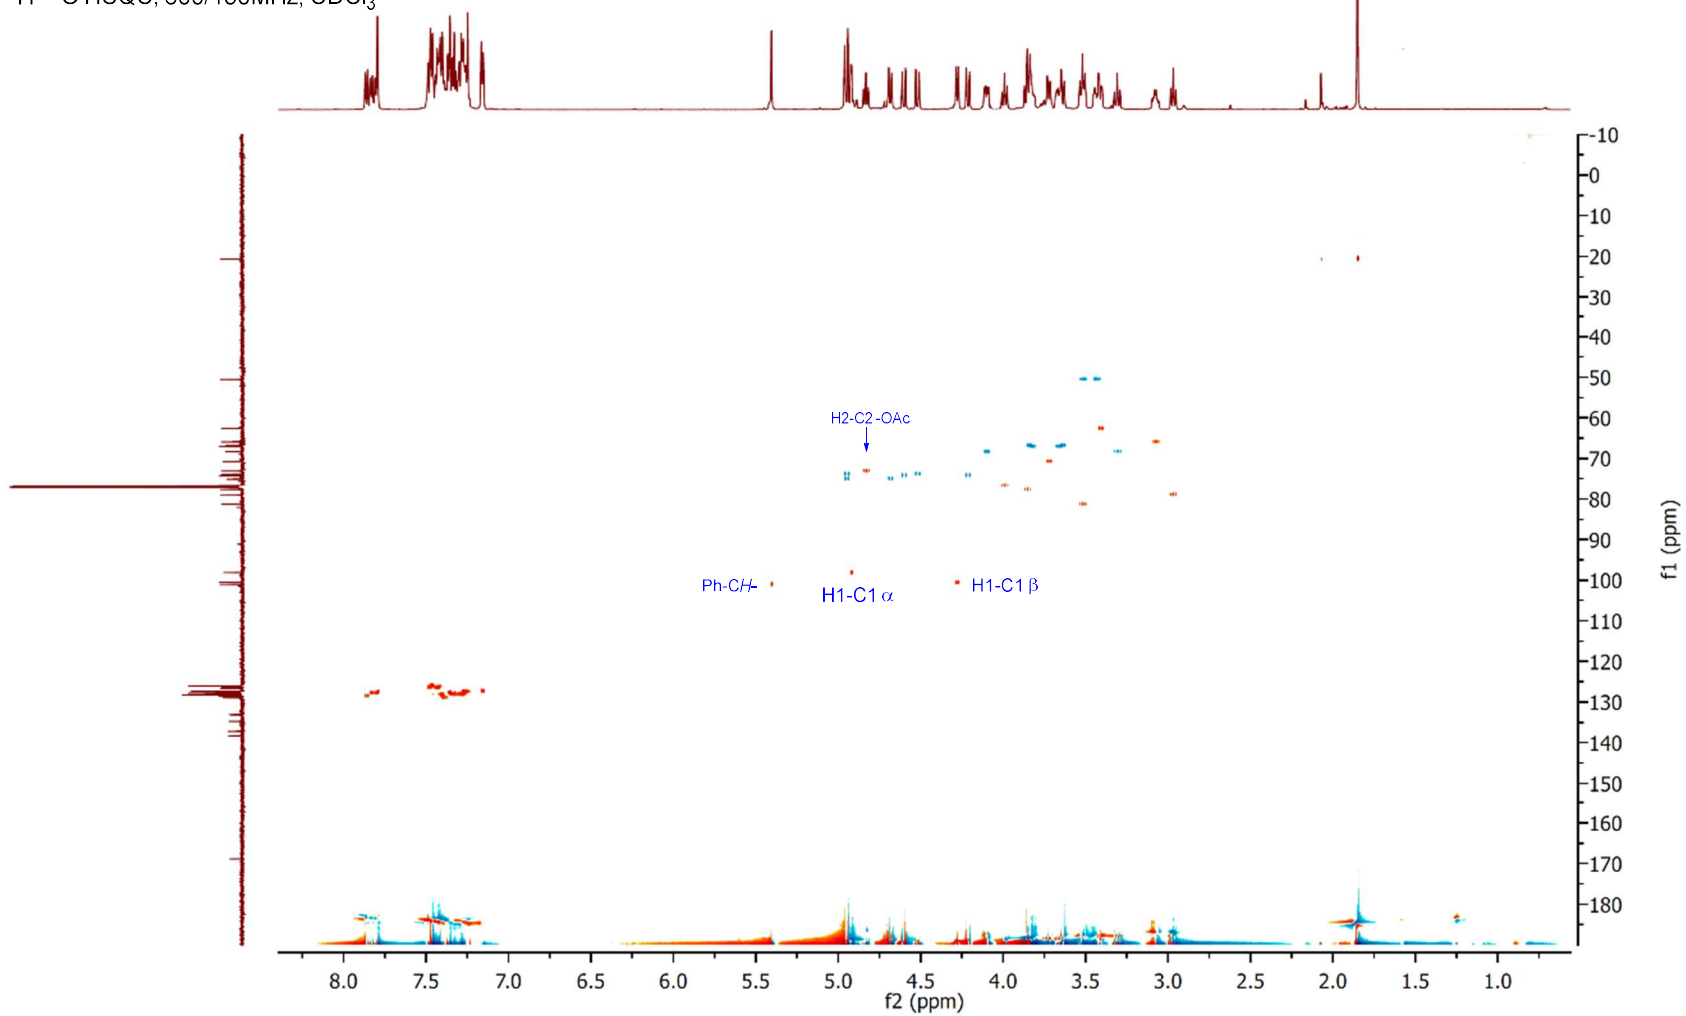

7.9000  
7.8861  
7.8595  
7.8447  
7.8097  
7.5196  
7.5026  
7.4894  
7.4794  
7.4774  
7.3517  
7.3400  
7.3307  
7.3186  
7.3059  
7.2829  
7.2755  
7.2710  
7.2646  
7.2480  
7.1749  
7.1631  
4.9824  
4.9621  
4.9445  
4.9344  
4.9277  
4.7780  
4.7642  
4.7486  
4.7382  
4.7200  
4.5386  
4.5182  
4.2478  
4.2285  
4.2099  
4.1961  
4.1910  
3.9507  
3.9351  
3.9191  
3.8686  
3.8522  
3.8466  
3.8345  
3.8285  
3.8223  
3.8148  
3.8104  
3.7496  
3.7329  
3.6828  
3.6796  
3.6731  
3.6465  
3.6287  
3.5655  
3.5604  
3.5454  
3.5401  
3.5232  
3.5171  
3.5108  
3.4401  
3.4369  
3.4212  
3.4152  
3.4041  
3.3981  
3.3932  
3.3776  
3.3621  
3.2160  
3.2059  
3.1960  
3.1859  
3.0460  
2.7847  
2.7693  
2.7539  
2.0930  
1.8075

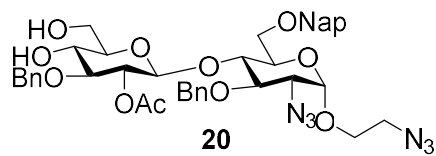

<sup>1</sup>H NMR, 600 MHz, CDCl<sub>3</sub>

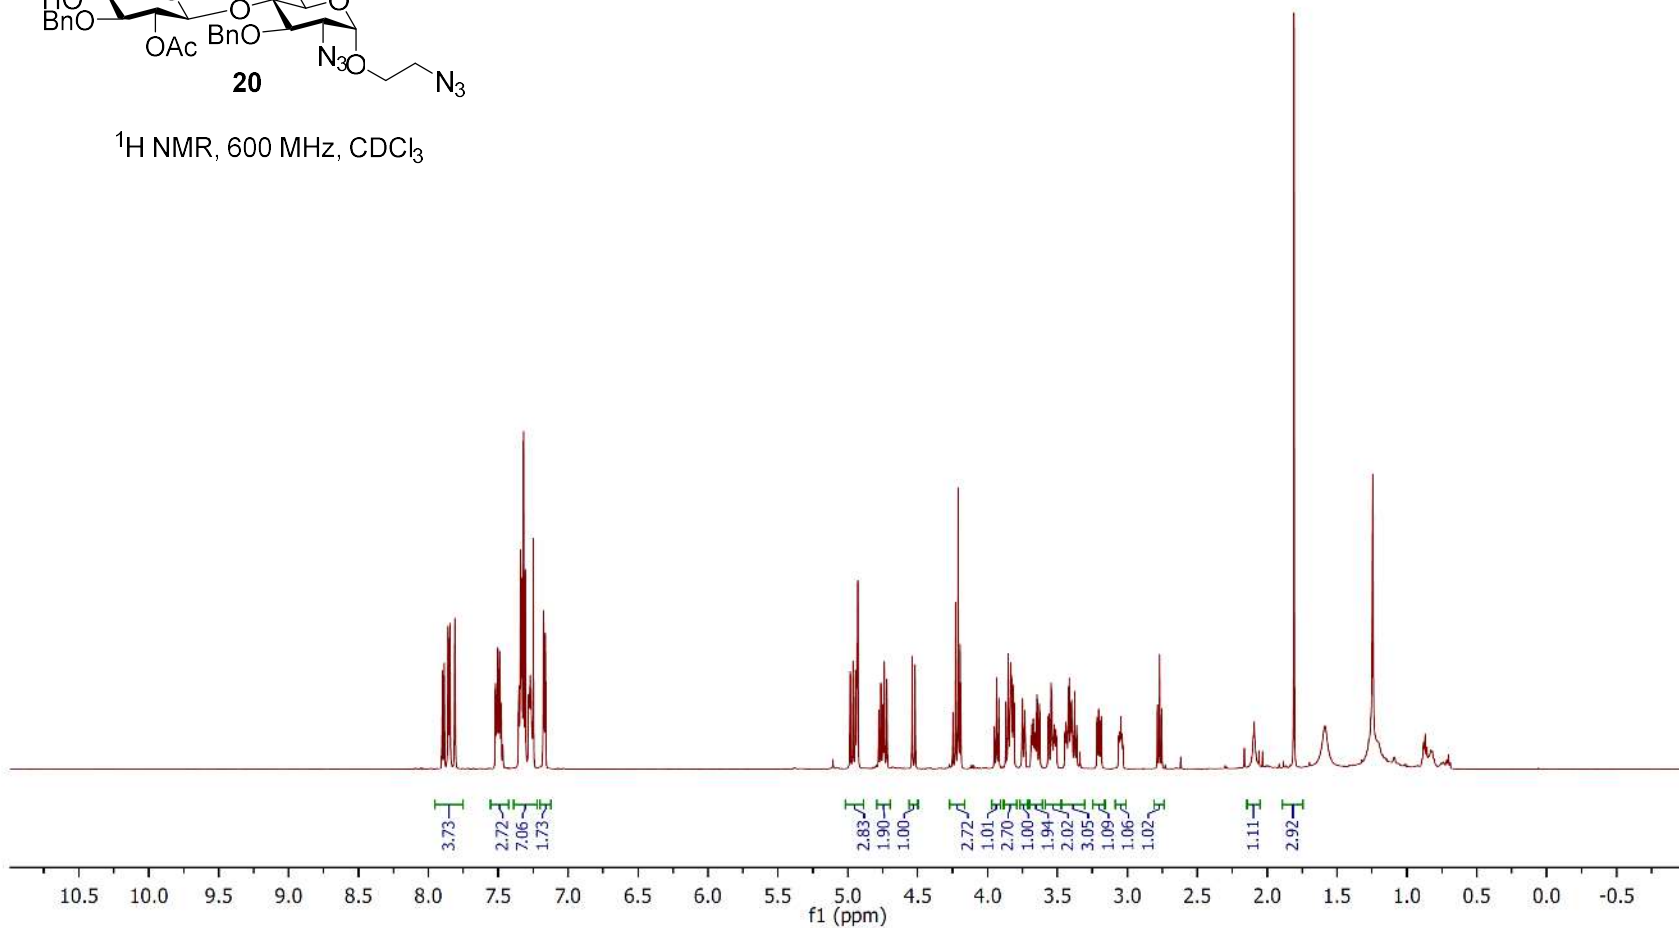



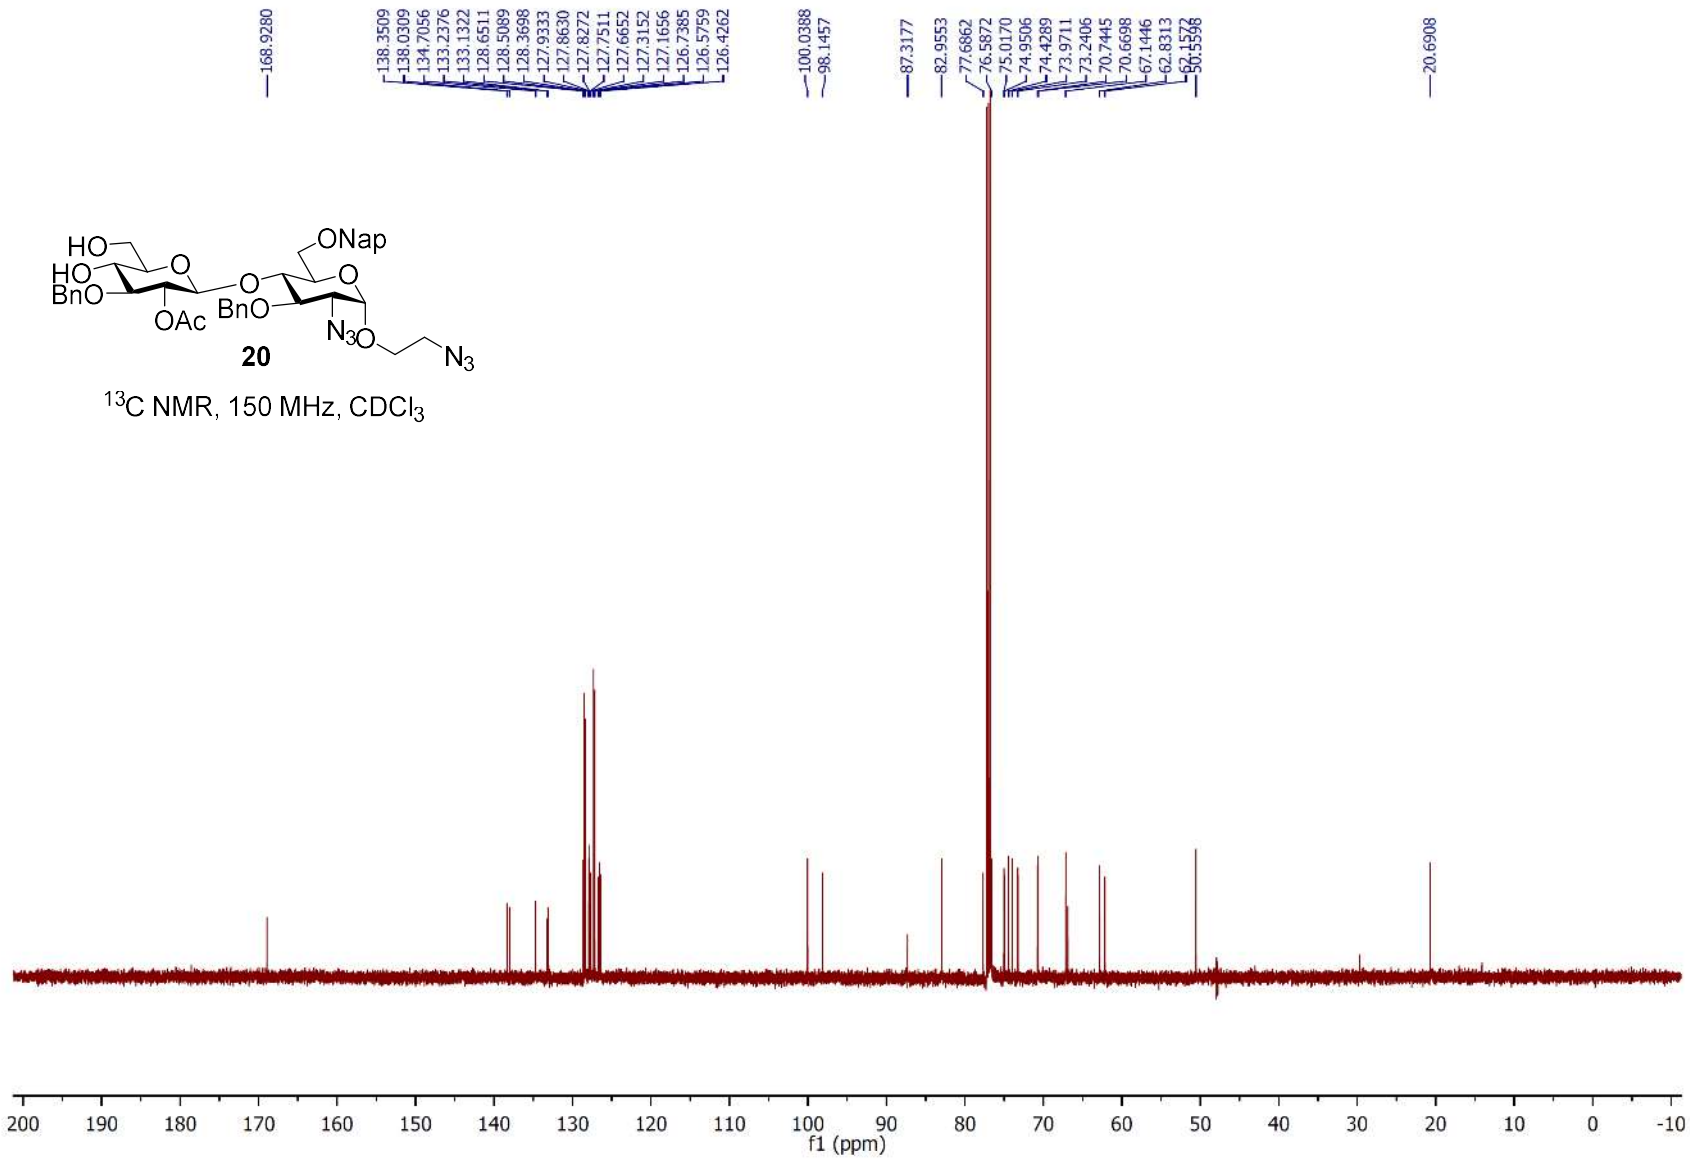

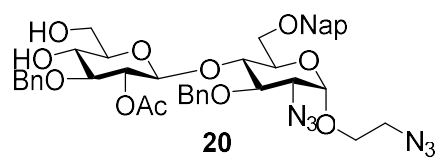

$^1\text{H}$ - $^1\text{H}$  COSY, 600 MHz,  $\text{CDCl}_3$

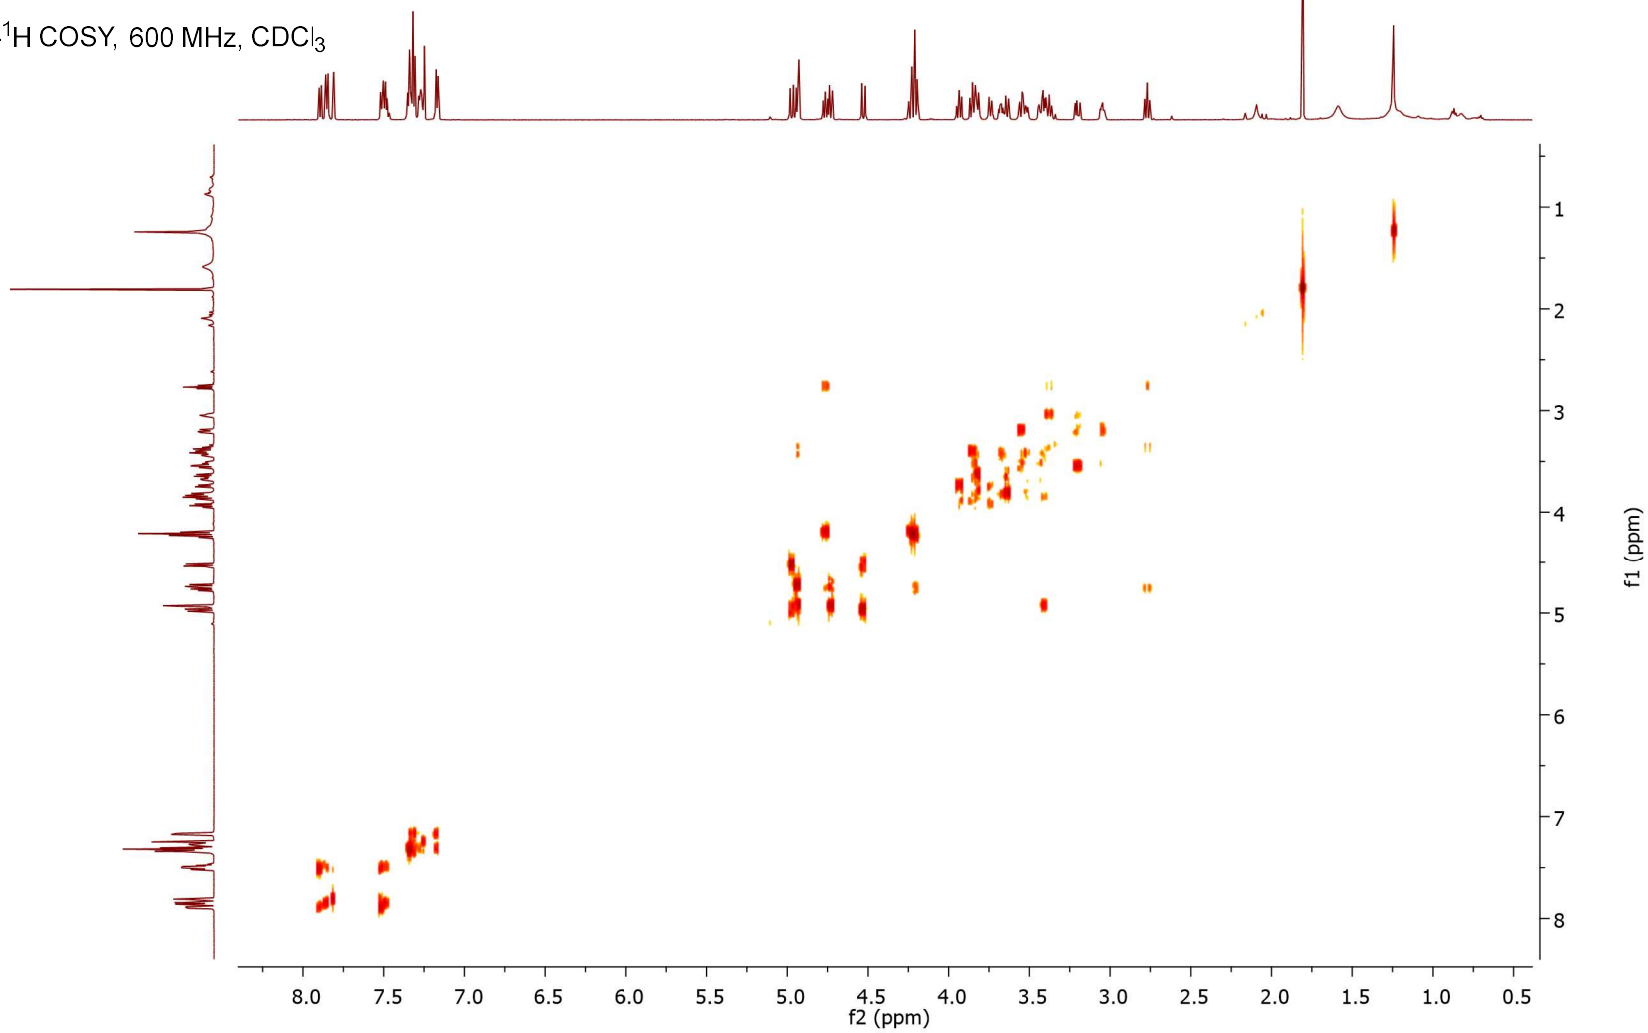

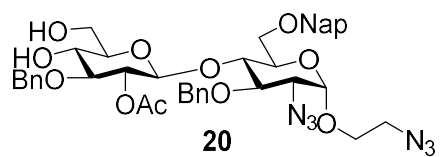

$^1\text{H}$ - $^{13}\text{C}$  HSQC, 600/150MHz,  $\text{CDCl}_3$

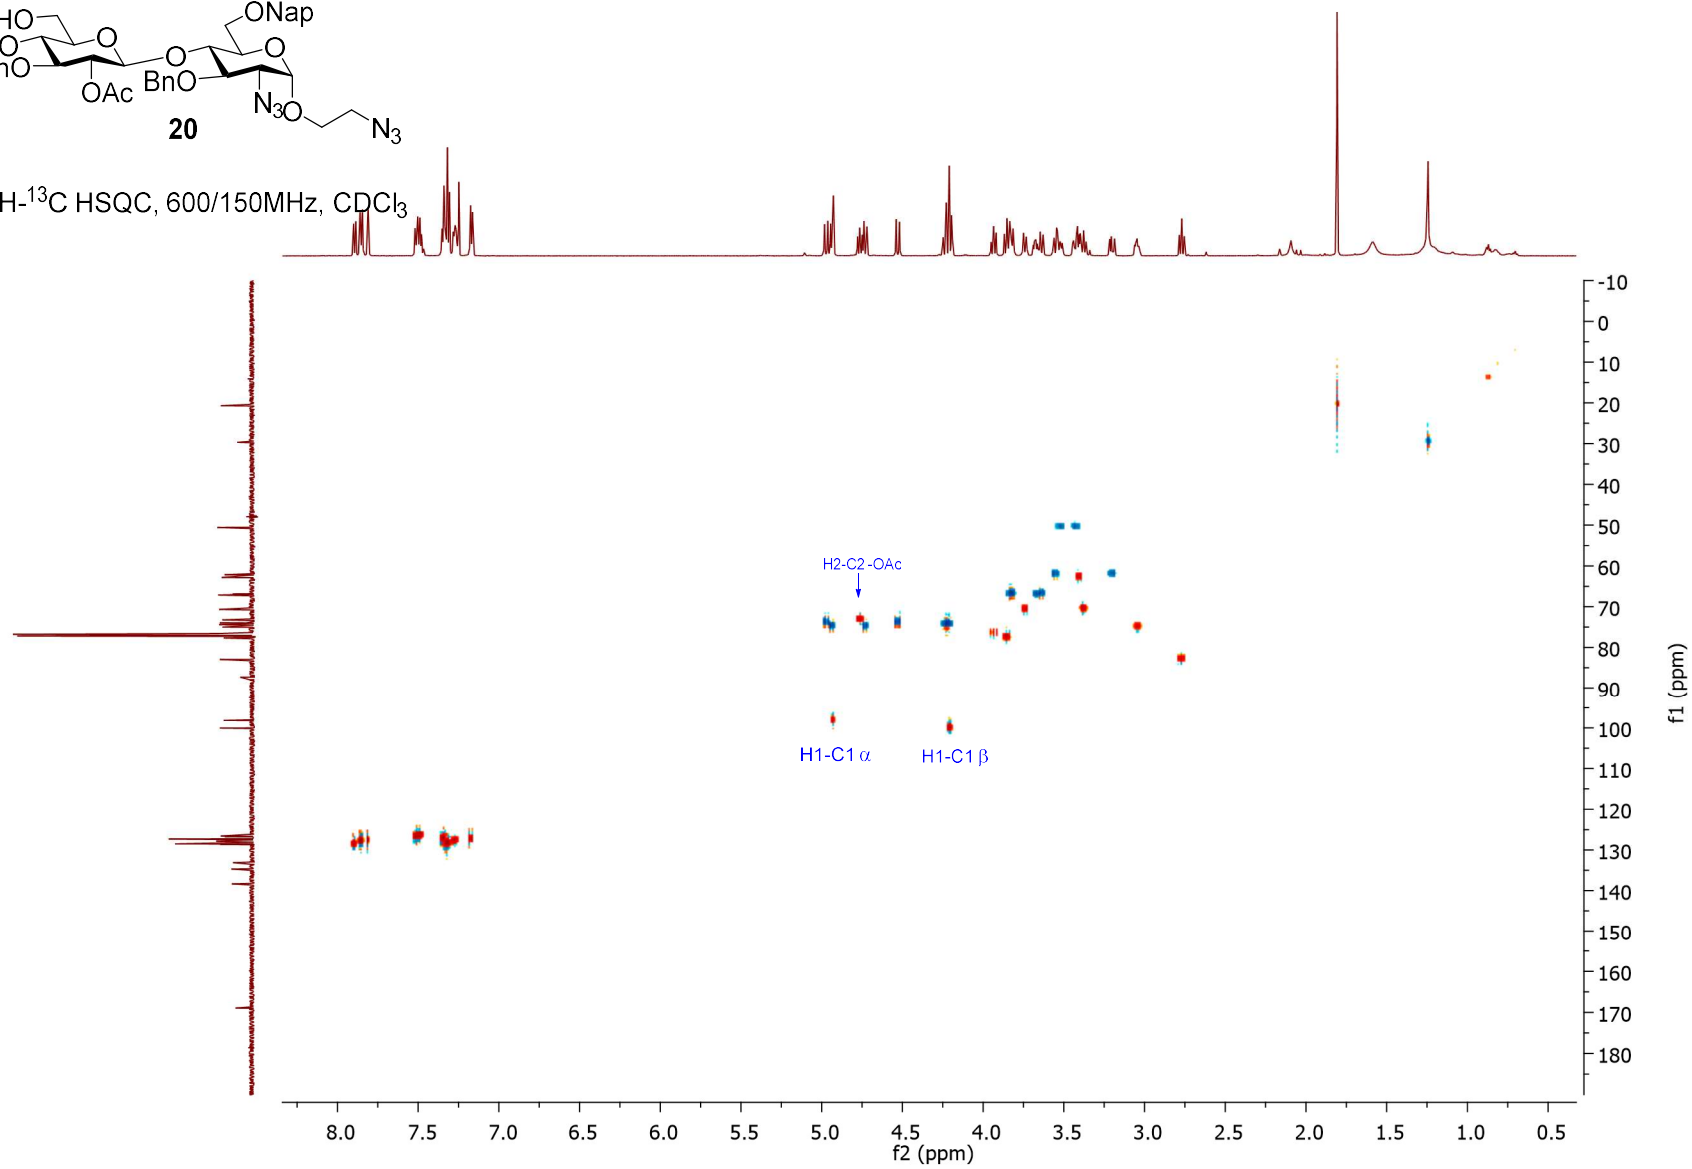

7.9023  
7.8883  
7.8571  
7.8540  
7.8434  
7.8059  
7.5132  
7.5105  
7.5007  
7.4984  
7.4969  
7.4944  
7.4898  
7.4852  
7.4815  
7.4786  
7.3578  
7.3556  
7.3438  
7.3151  
7.3035  
7.3008  
7.2931  
7.2908  
7.2872  
7.2743  
7.2657  
7.2536  
7.2477  
7.2378  
7.2256  
7.1904  
7.1881  
7.1766  
5.0657  
5.0475  
4.9682  
4.9479  
4.9243  
4.9183  
4.8357  
4.8221  
4.8198  
4.8062  
4.6247  
4.6065  
4.5441  
4.5287  
4.5238  
4.5092  
4.3357  
4.3221  
4.2328  
4.2132  
4.0317  
4.0302  
4.0153  
3.8794  
3.8673  
3.8647  
3.8622  
3.8538  
3.8478  
3.8175  
3.8052  
3.7993  
3.7456  
3.6589  
3.6554  
3.6410  
3.5411  
3.5247  
3.5118  
3.3863  
3.3803  
3.3691  
3.3631  
2.9185  
2.9138  
2.8553  
2.8401  
2.8246  
1.8283

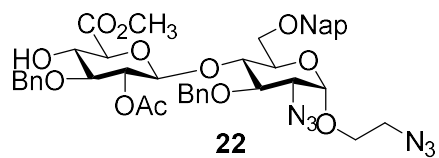

$^1\text{H NMR}$ , 600 MHz,  $\text{CDCl}_3$

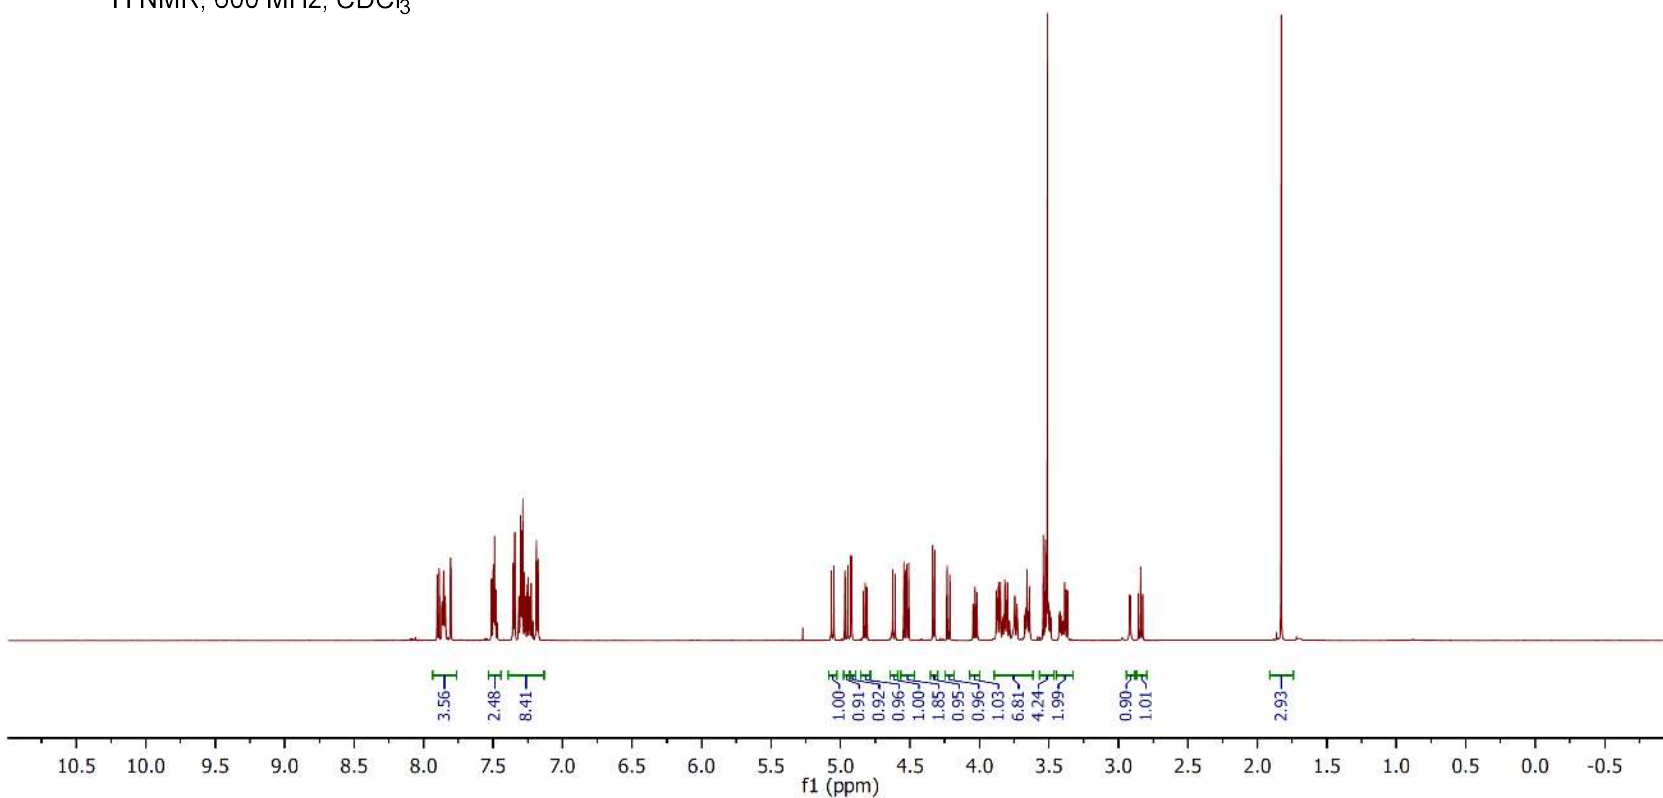

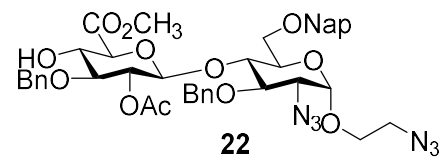

$^{13}\text{C}$  NMR, 150 MHz,  $\text{CDCl}_3$

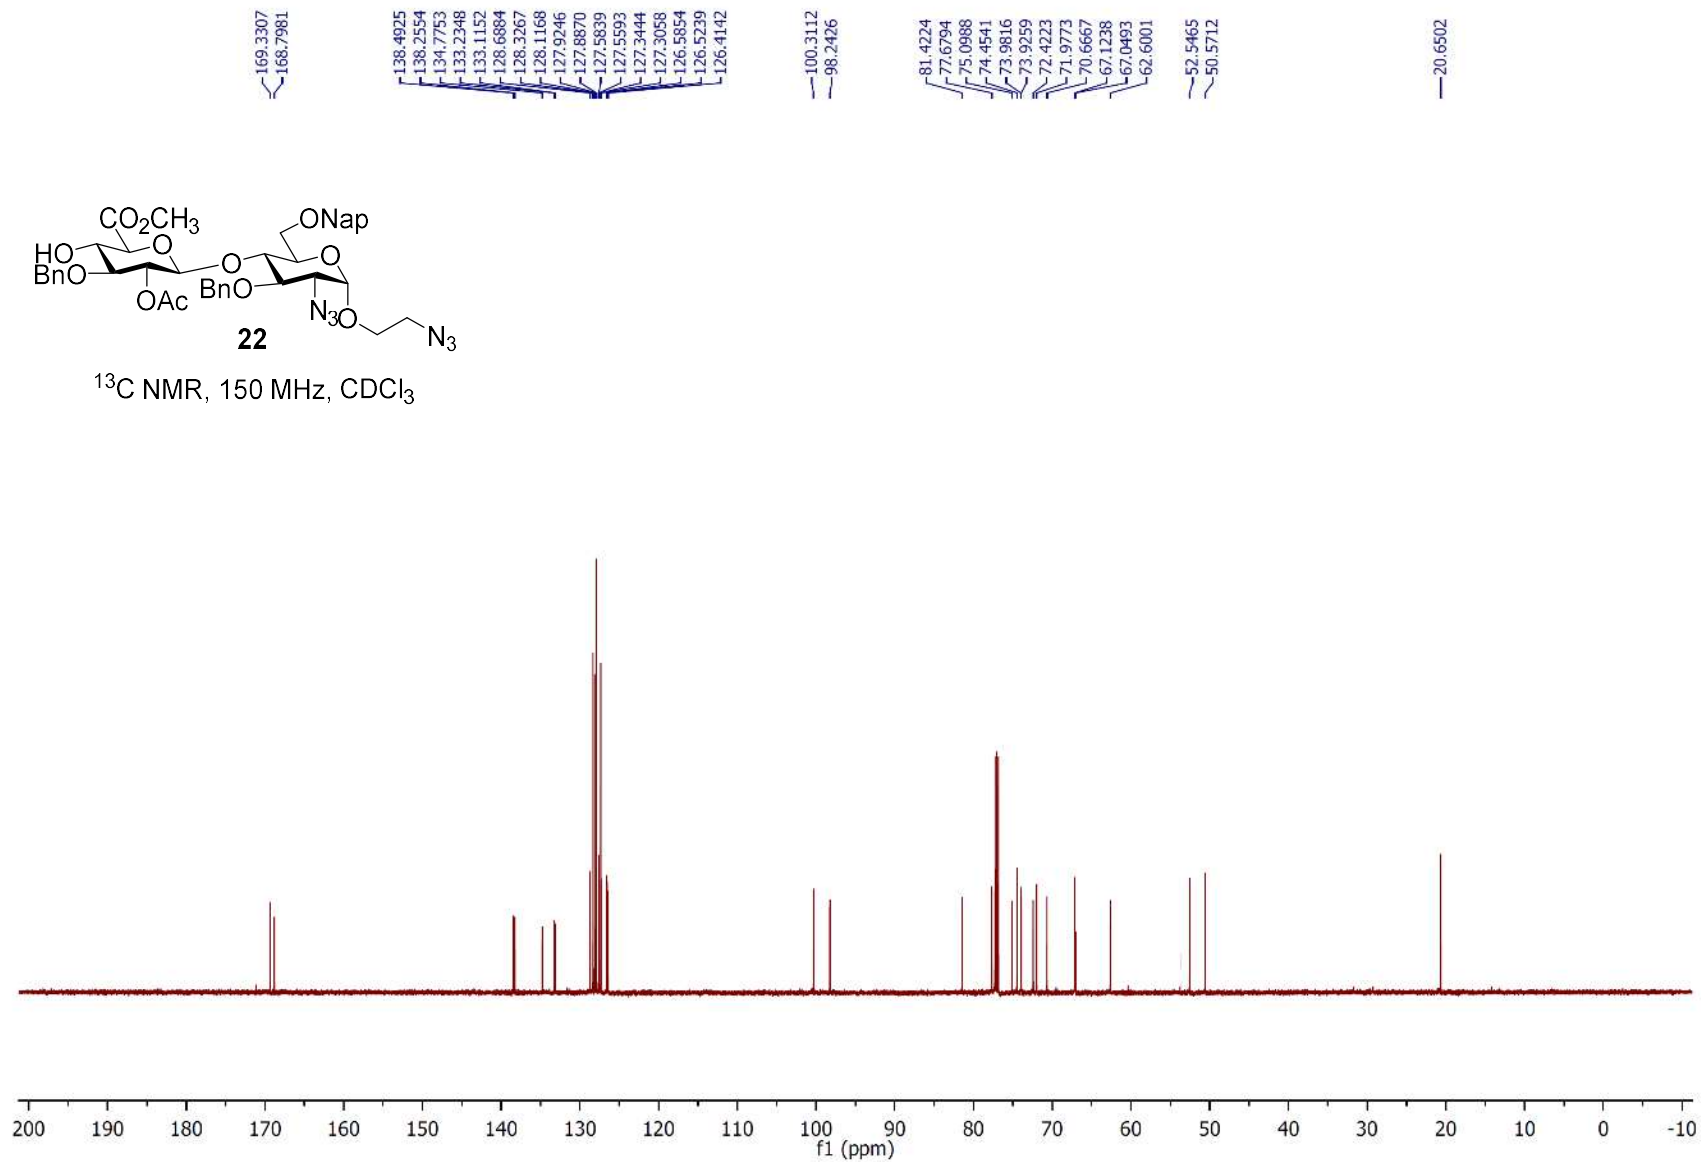

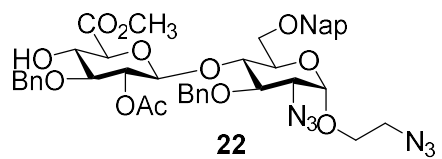

$^1\text{H}$ - $^1\text{H}$  COSY, 600 MHz,  $\text{CDCl}_3$

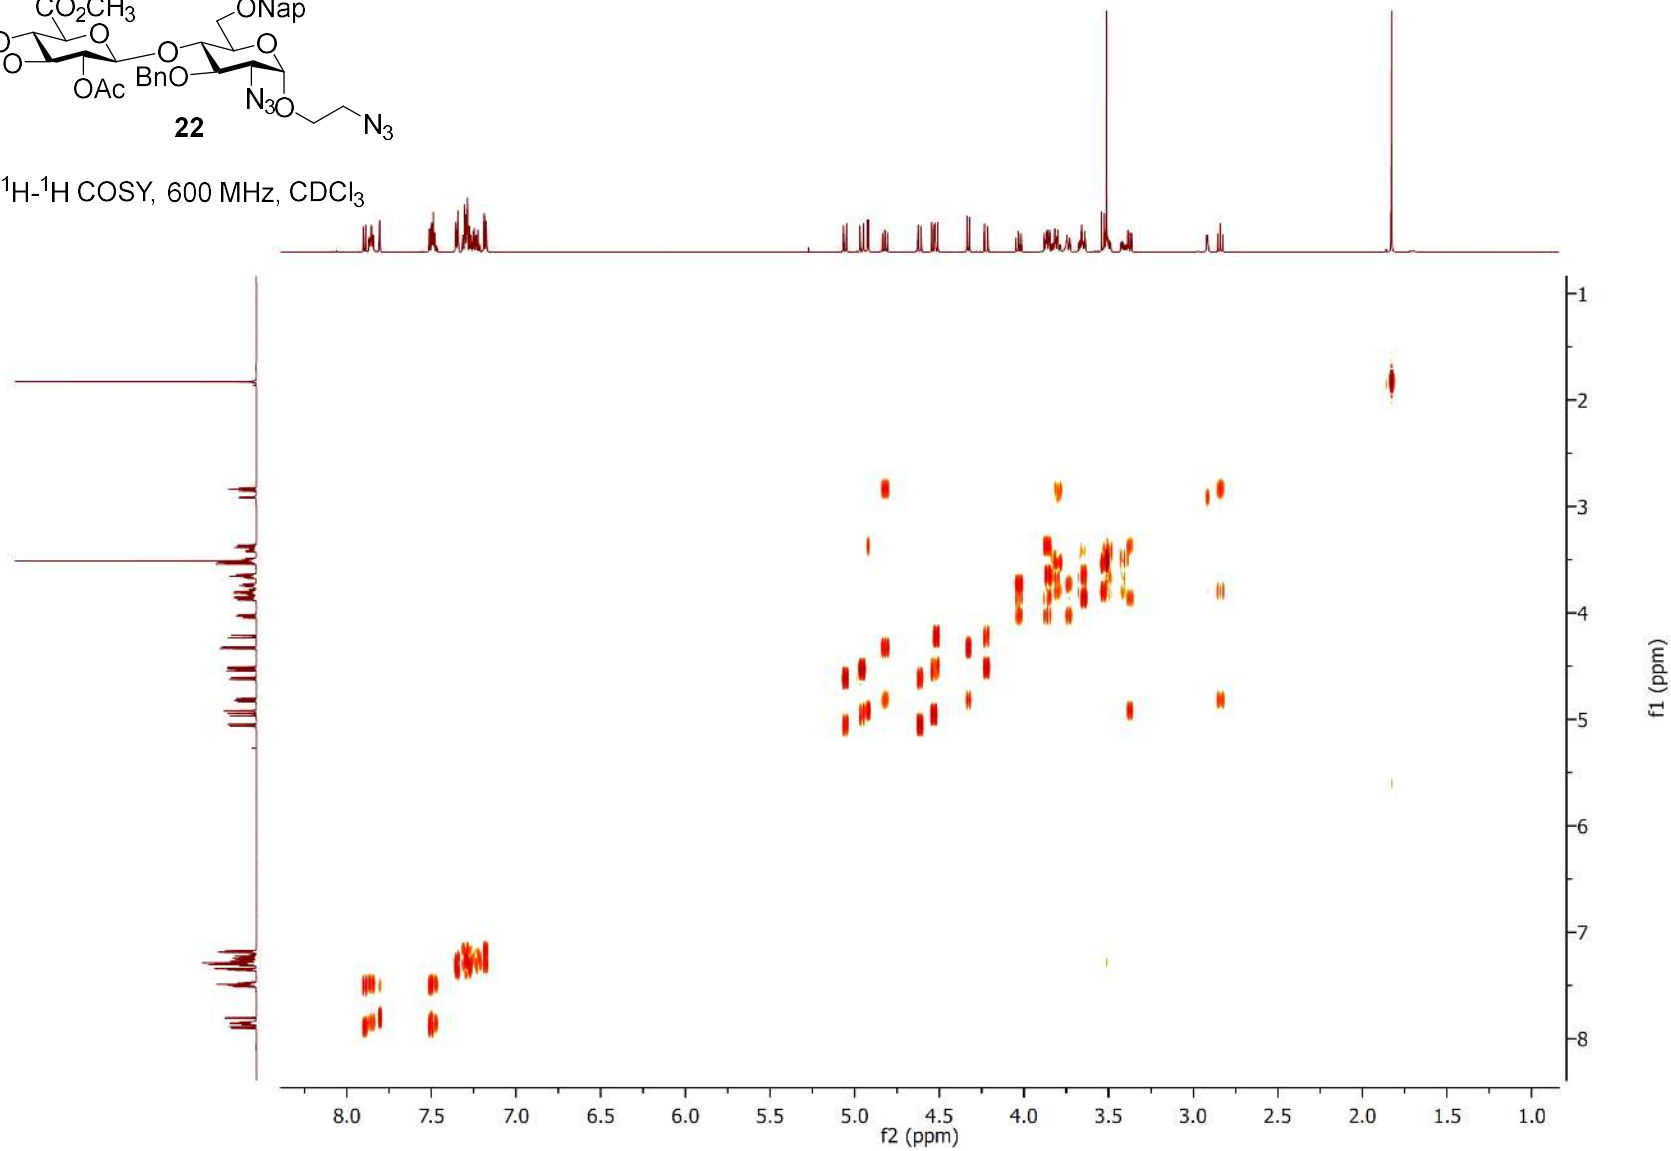

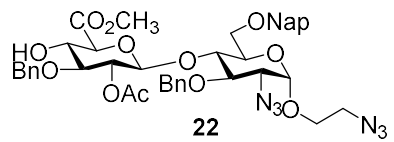

$^1\text{H}$ - $^{13}\text{C}$  HSQC, 600/150MHz,  $\text{CDCl}_3$

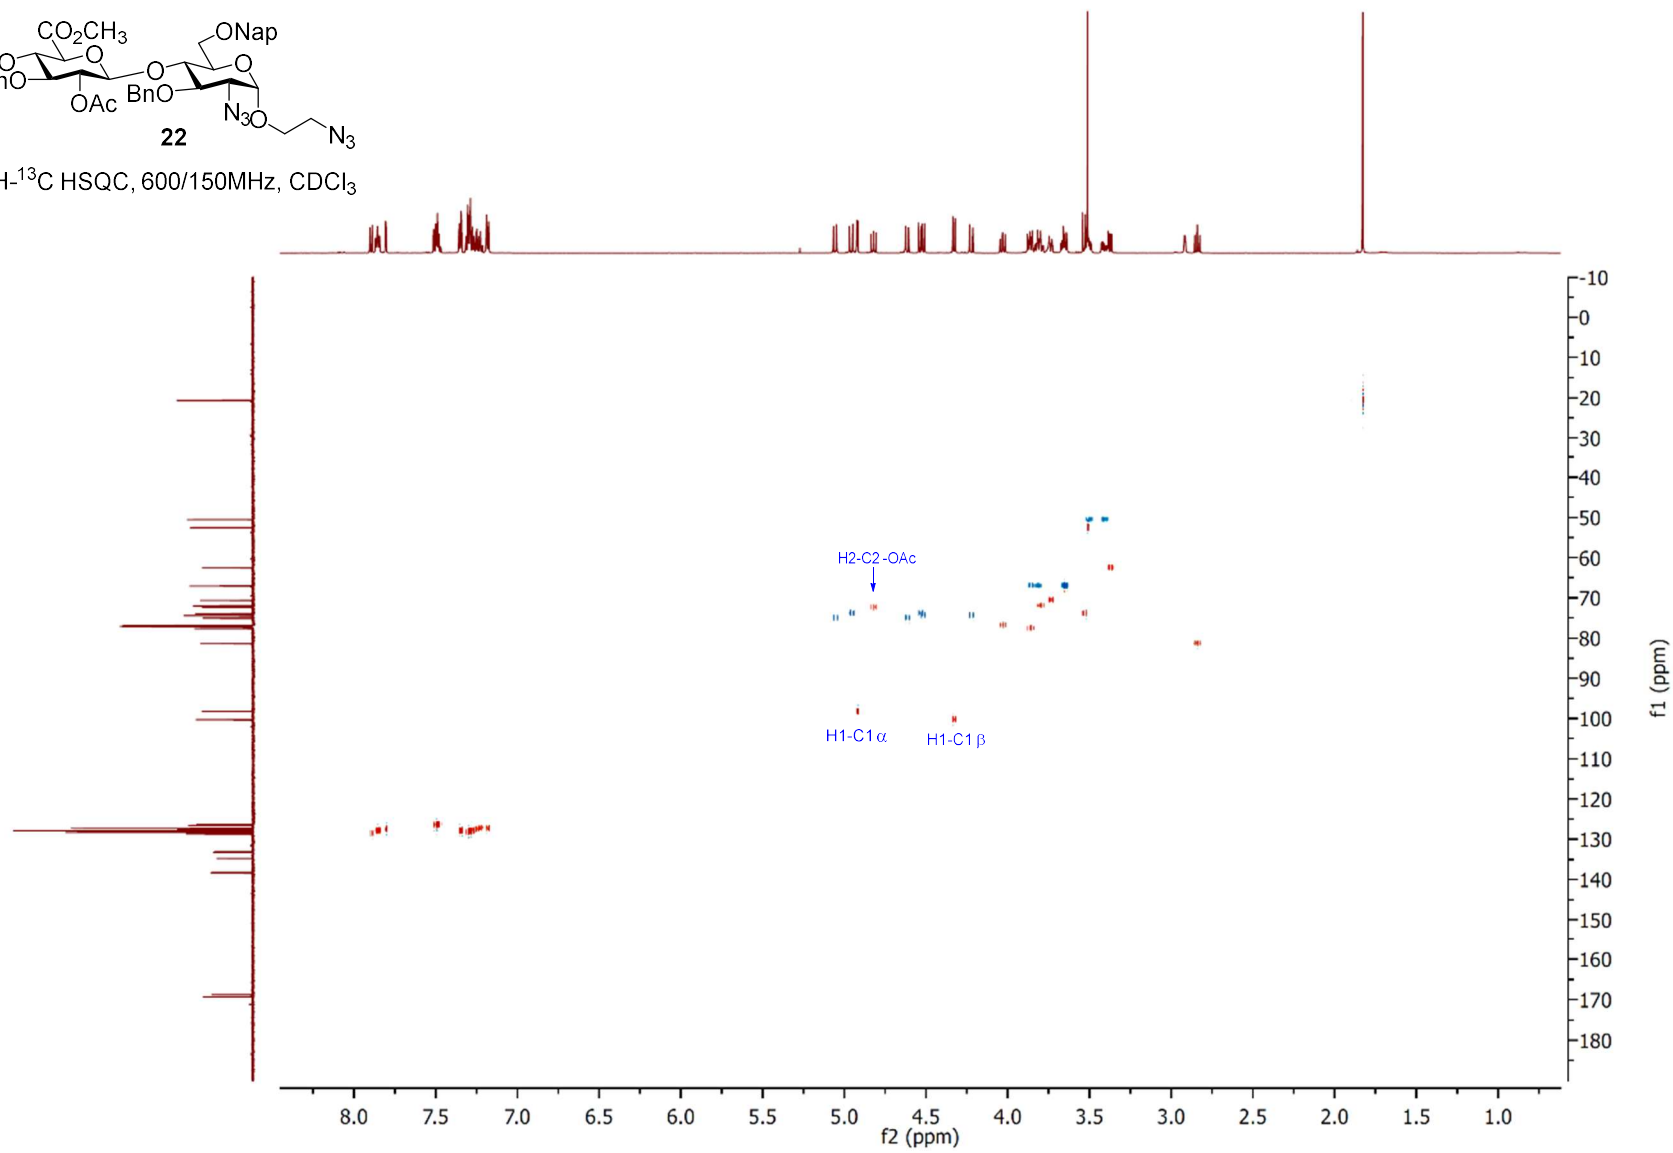

7.8698  
7.8558  
7.8502  
7.8482  
7.8354  
7.8224  
7.8098  
7.8078  
7.8004  
7.5024  
7.4998  
7.4884  
7.4858  
7.4700  
7.4673  
7.4573  
7.4563  
7.4461  
7.4429  
7.4332  
7.4308  
7.4034  
7.4009  
7.3913  
7.3889  
7.3861  
7.3280  
7.3160  
7.3076  
7.2960  
7.2838  
7.2772  
7.2749  
7.2686  
7.2629  
7.2568  
7.2482  
7.1933  
7.1909  
7.1796  
5.4178  
5.2913  
5.2764  
4.9531  
4.9327  
4.9089  
4.9029  
4.8881  
4.8746  
4.8728  
4.8593  
4.8264  
4.8065  
4.6808  
4.6610  
4.5660  
4.5455  
4.5411  
4.5210  
4.3575  
4.3441  
4.3227  
4.3028  
4.1708  
4.0046  
3.8017  
3.6580  
3.6548  
3.6397  
3.5767  
3.5724  
3.5585  
3.5548  
3.5447  
3.5401  
3.5292  
3.4002  
3.1284  
3.1177  
3.1131  
1.8725  
1.7948

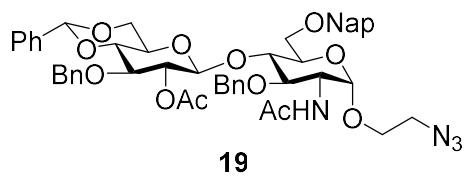

$^1\text{H NMR}$ , 600 MHz,  $\text{CDCl}_3$

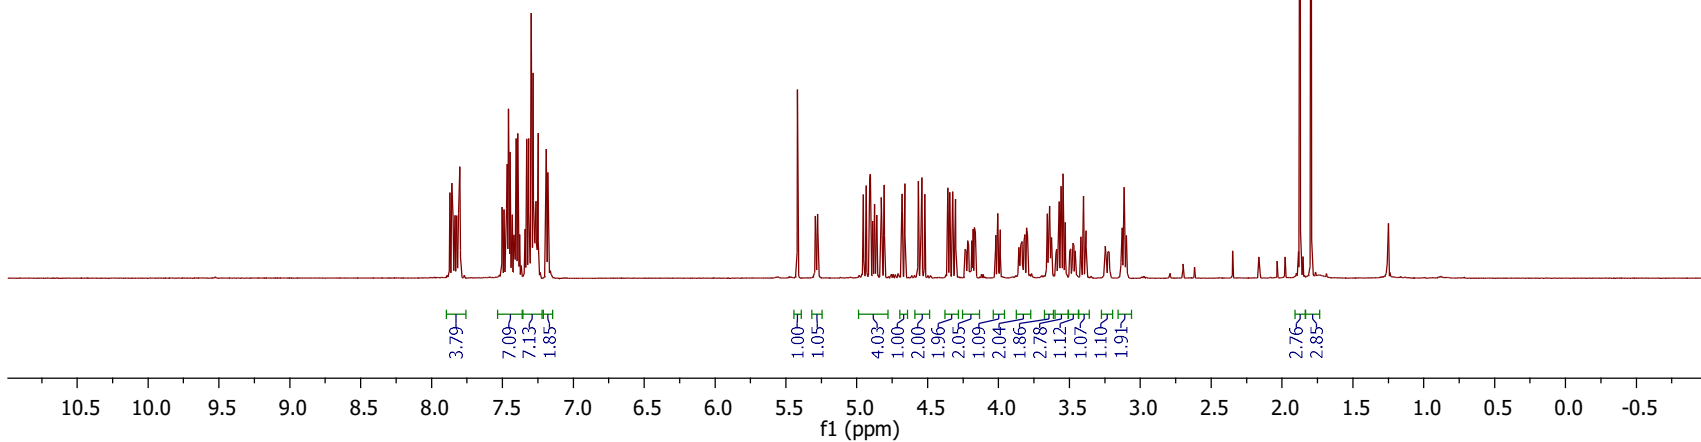



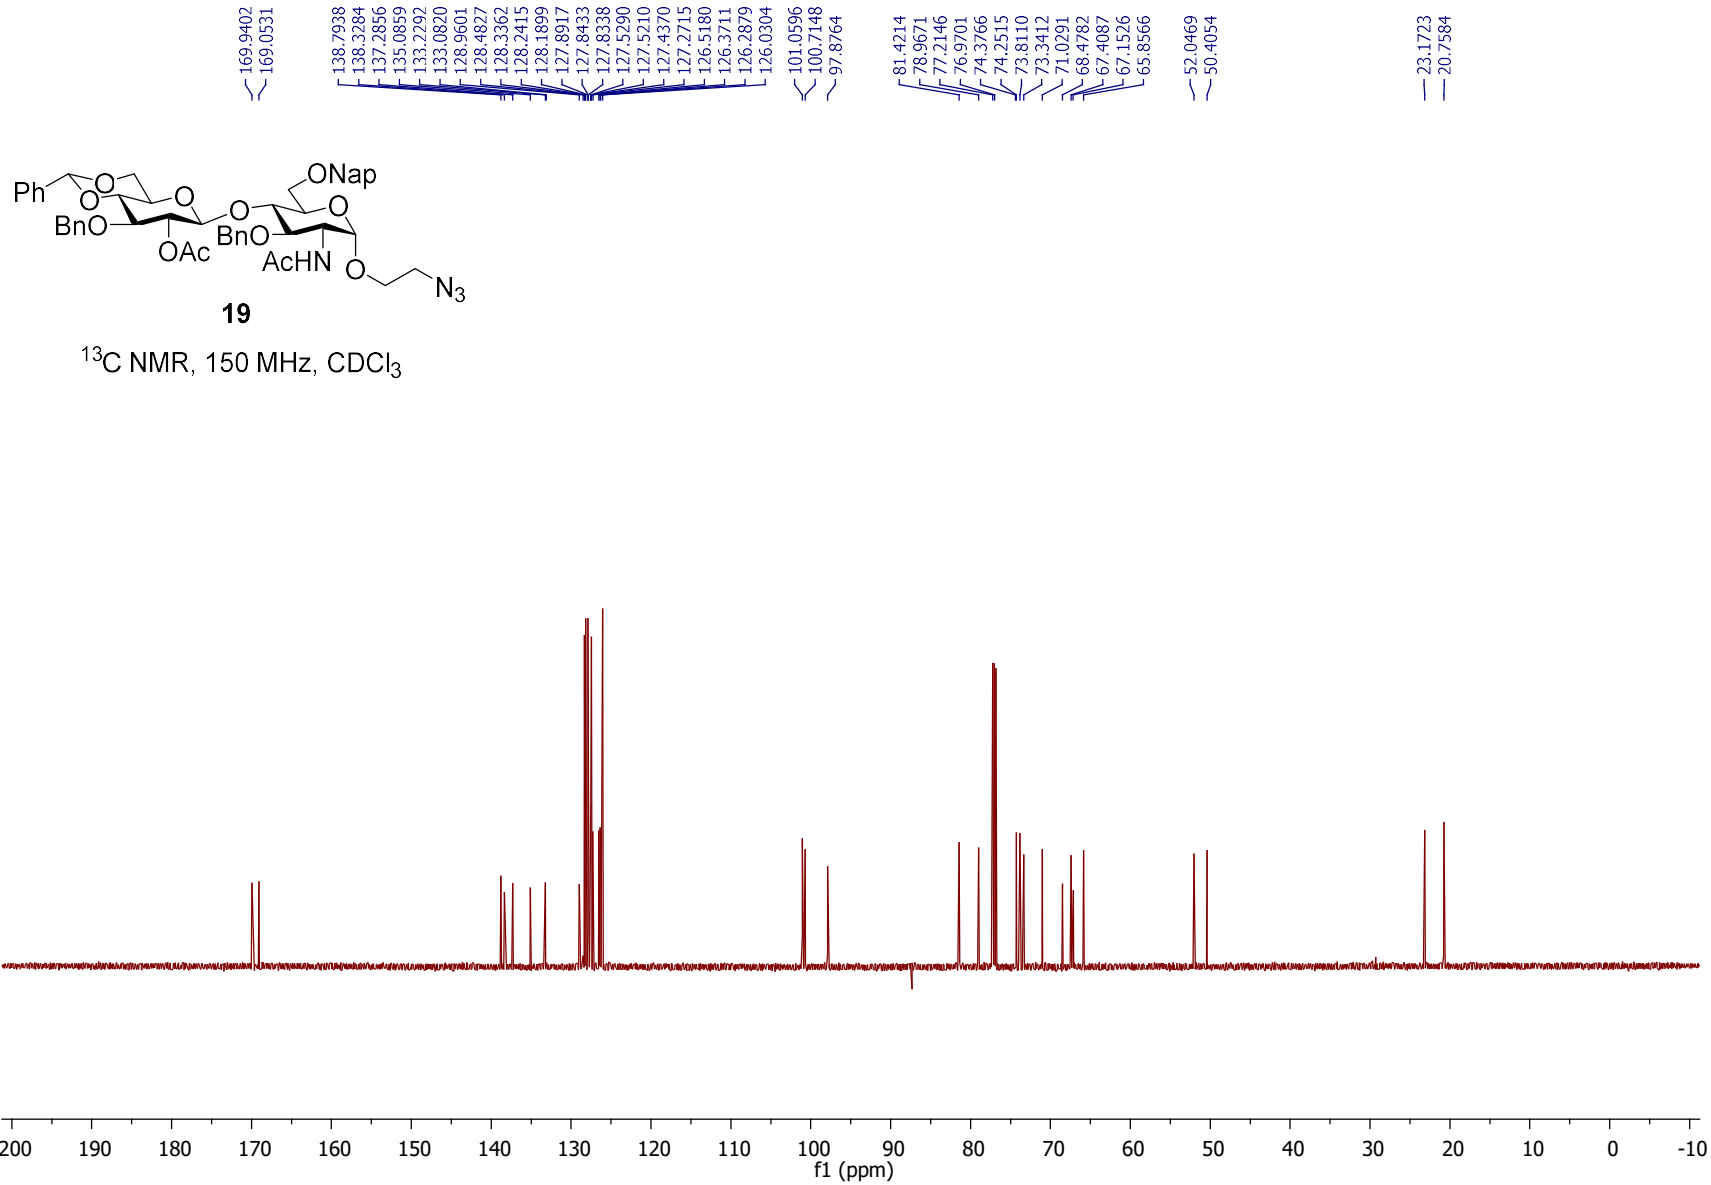

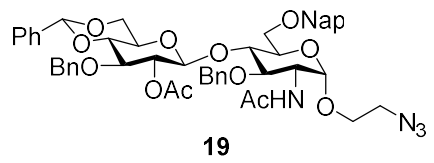

$^1\text{H}$ - $^{13}\text{C}$  HSQC, 600/150MHz,  $\text{CDCl}_3$

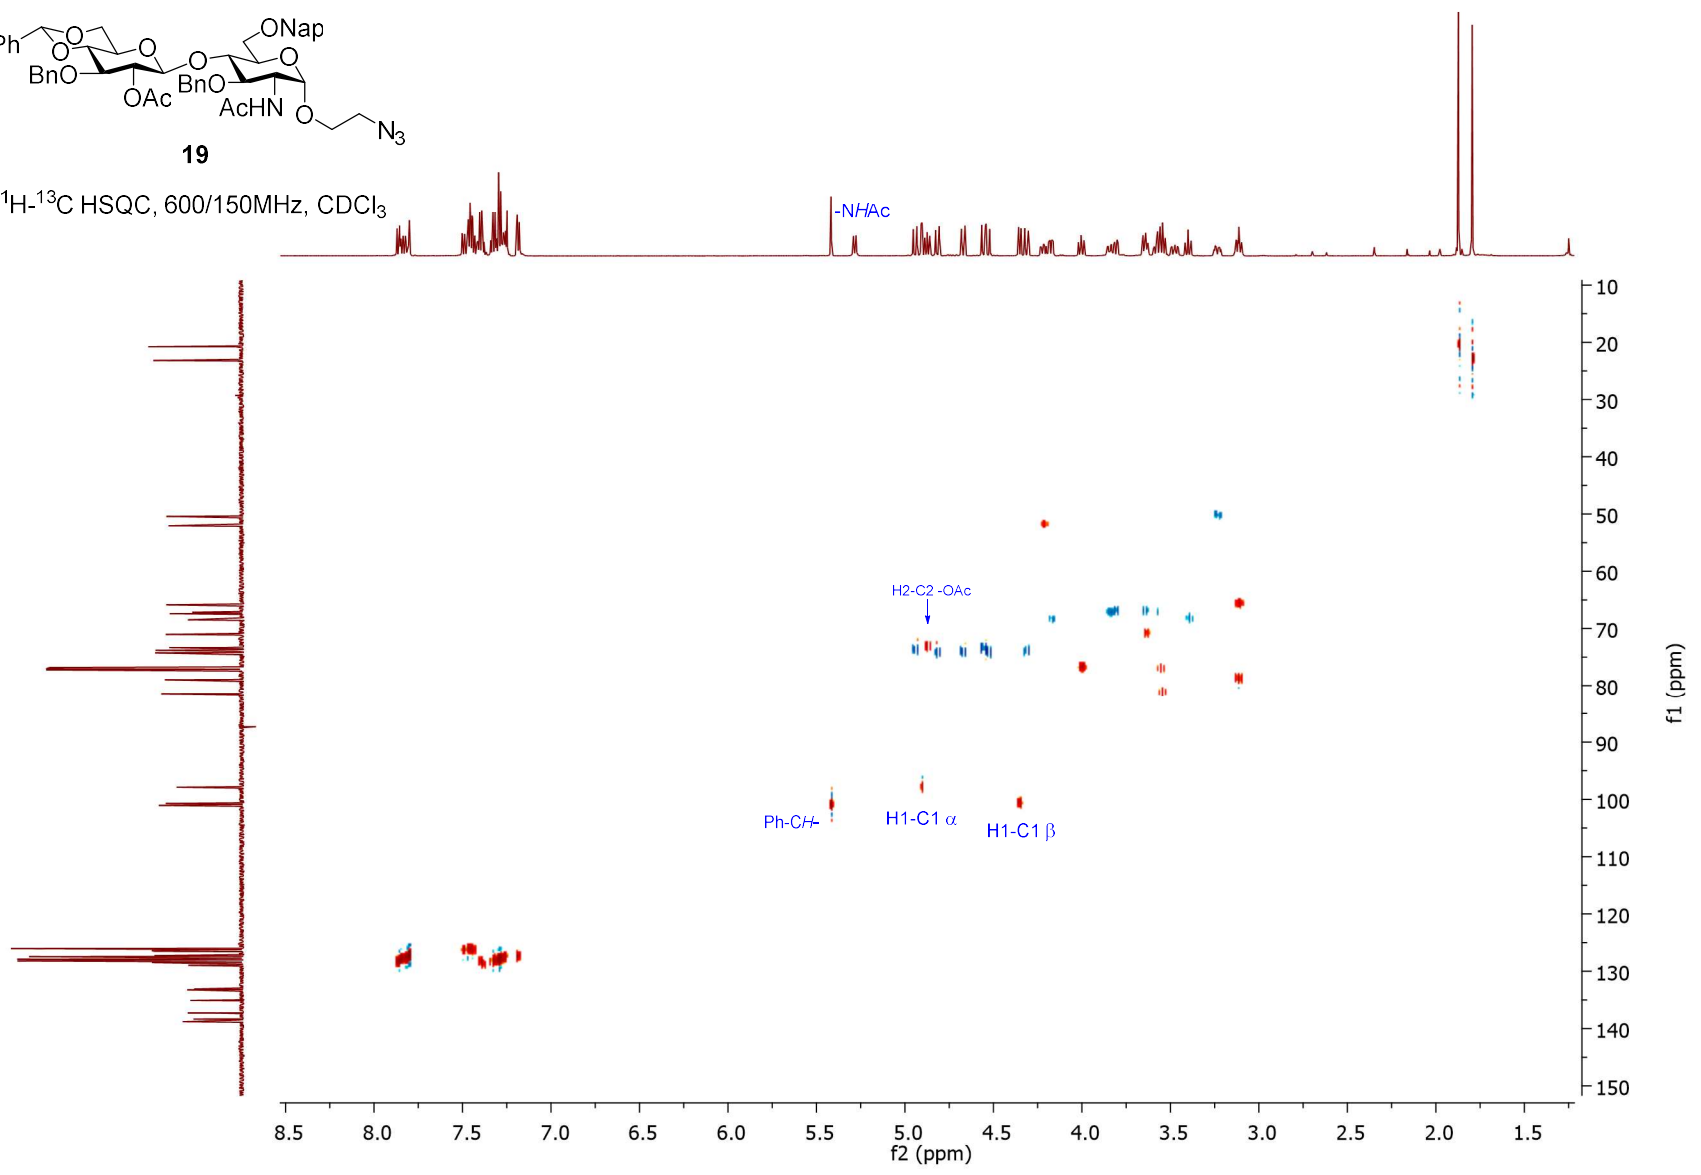

7.8912  
7.8772  
7.8547  
7.8417  
7.7981  
7.5157  
7.5131  
7.5018  
7.4991  
7.4928  
7.4902  
7.4812  
7.4779  
7.4687  
7.4661  
7.3237  
7.3122  
7.2997  
7.2924  
7.2892  
7.2725  
7.2615  
7.2577  
7.2545  
7.2482  
7.2427  
7.2029  
7.2007  
7.1891  
5.3080  
5.2928  
4.9421  
4.9217  
4.8778  
4.8717  
4.8242  
4.8134  
4.8042  
4.8000  
4.7976  
4.7841  
4.5702  
4.5497  
4.5372  
4.5172  
4.4289  
4.4095  
4.3174  
4.2981  
4.2848  
4.1116  
4.0997  
3.9642  
3.9485  
3.7781  
3.7658  
3.7605  
3.6829  
3.6681  
3.6630  
3.6541  
3.6487  
3.6375  
3.6308  
3.5896  
3.5572  
3.5427  
3.5399  
3.5251  
3.4693  
3.4672  
3.4650  
3.4515  
3.4361  
3.4273  
3.4175  
3.4073  
3.3975  
2.9612  
2.9458  
2.9304  
1.8064  
1.7865

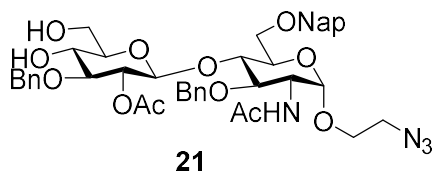

$^1\text{H NMR}$ , 600 MHz,  $\text{CDCl}_3$

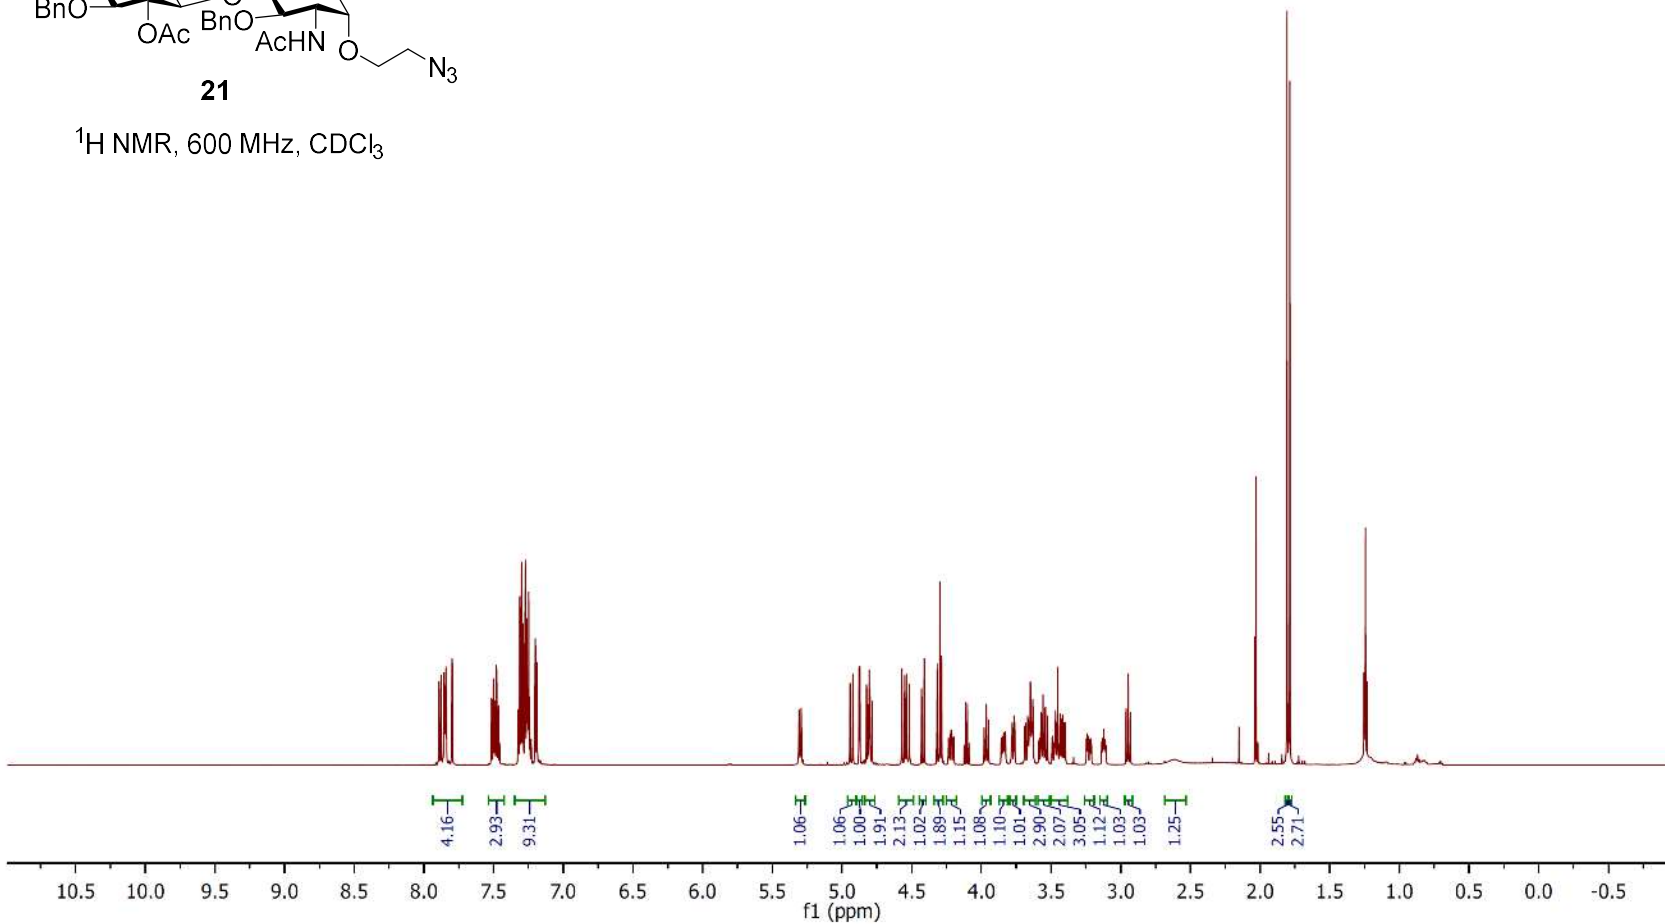

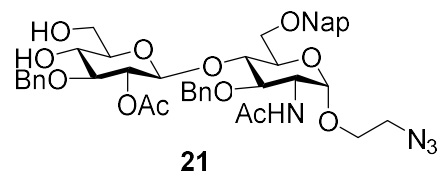

$^{13}\text{C}$  NMR, 150 MHz,  $\text{CDCl}_3$

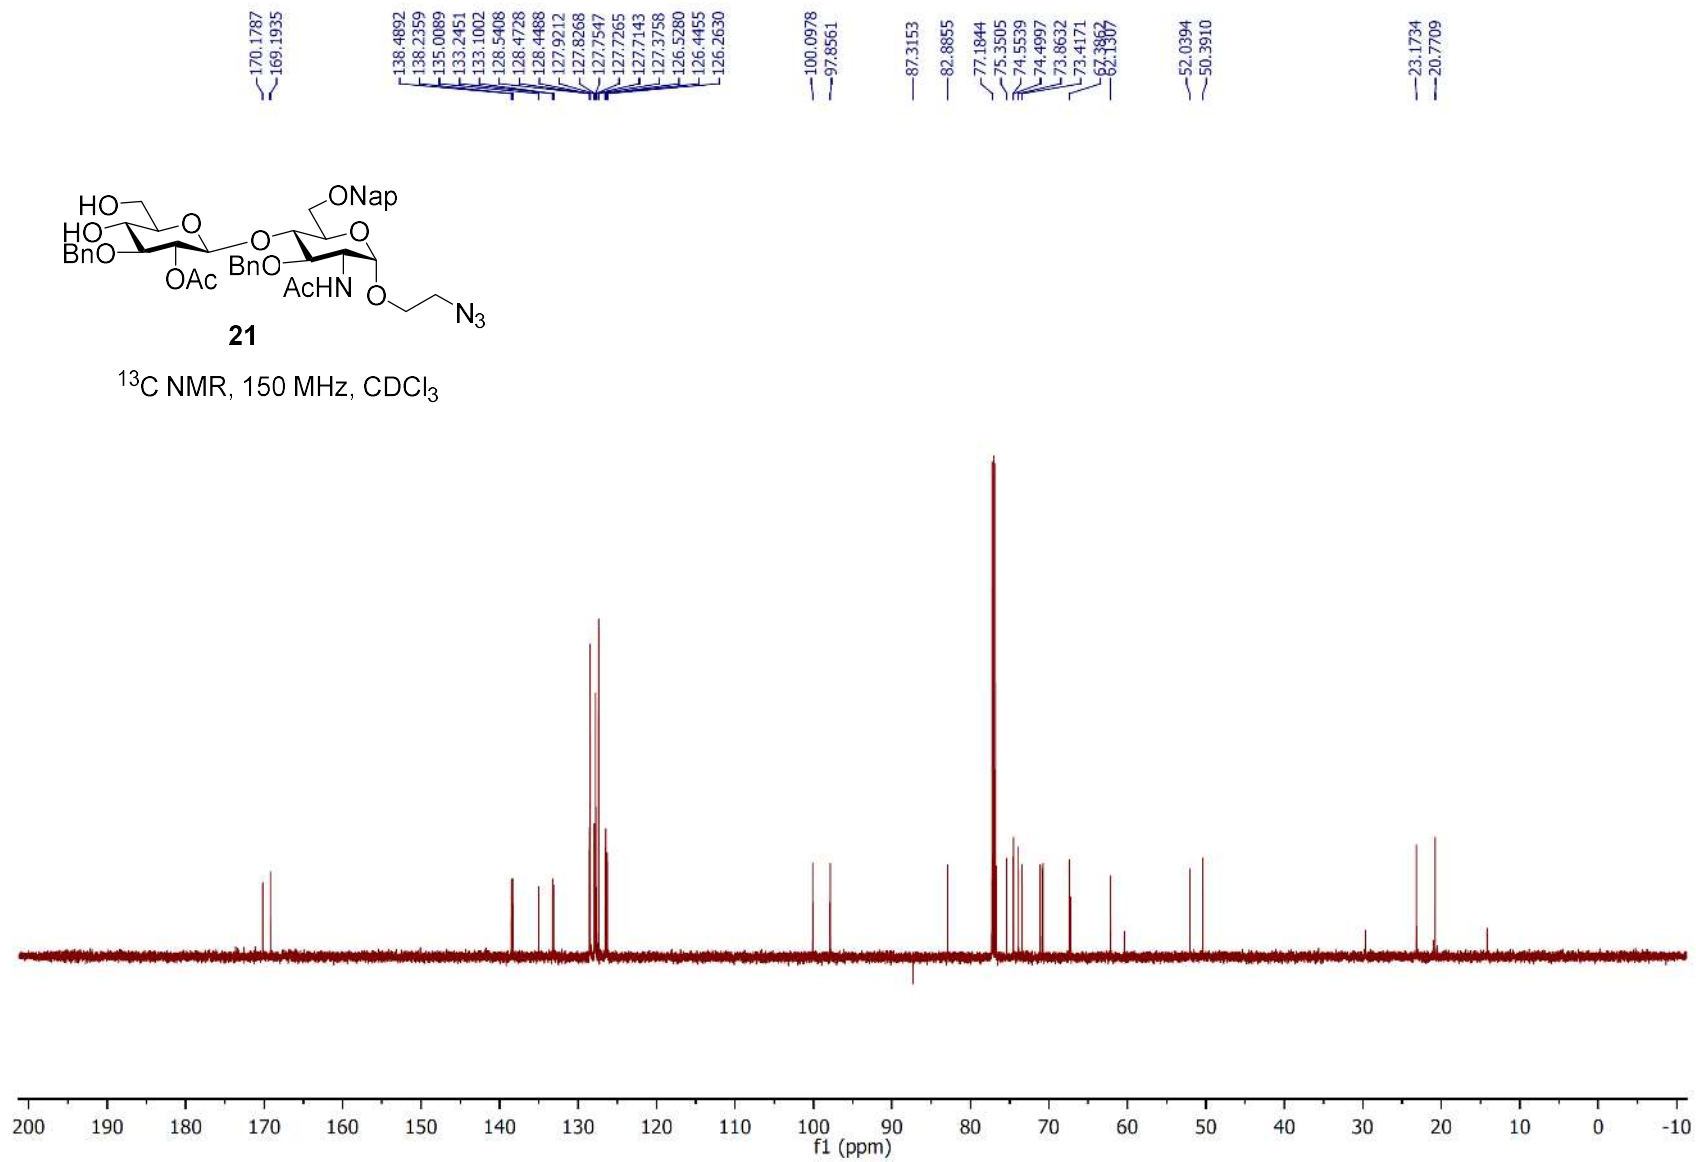

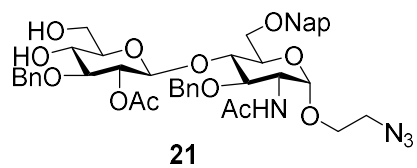

<sup>1</sup>H-<sup>13</sup>C HSQC, 600/150MHz, CDCl<sub>3</sub>

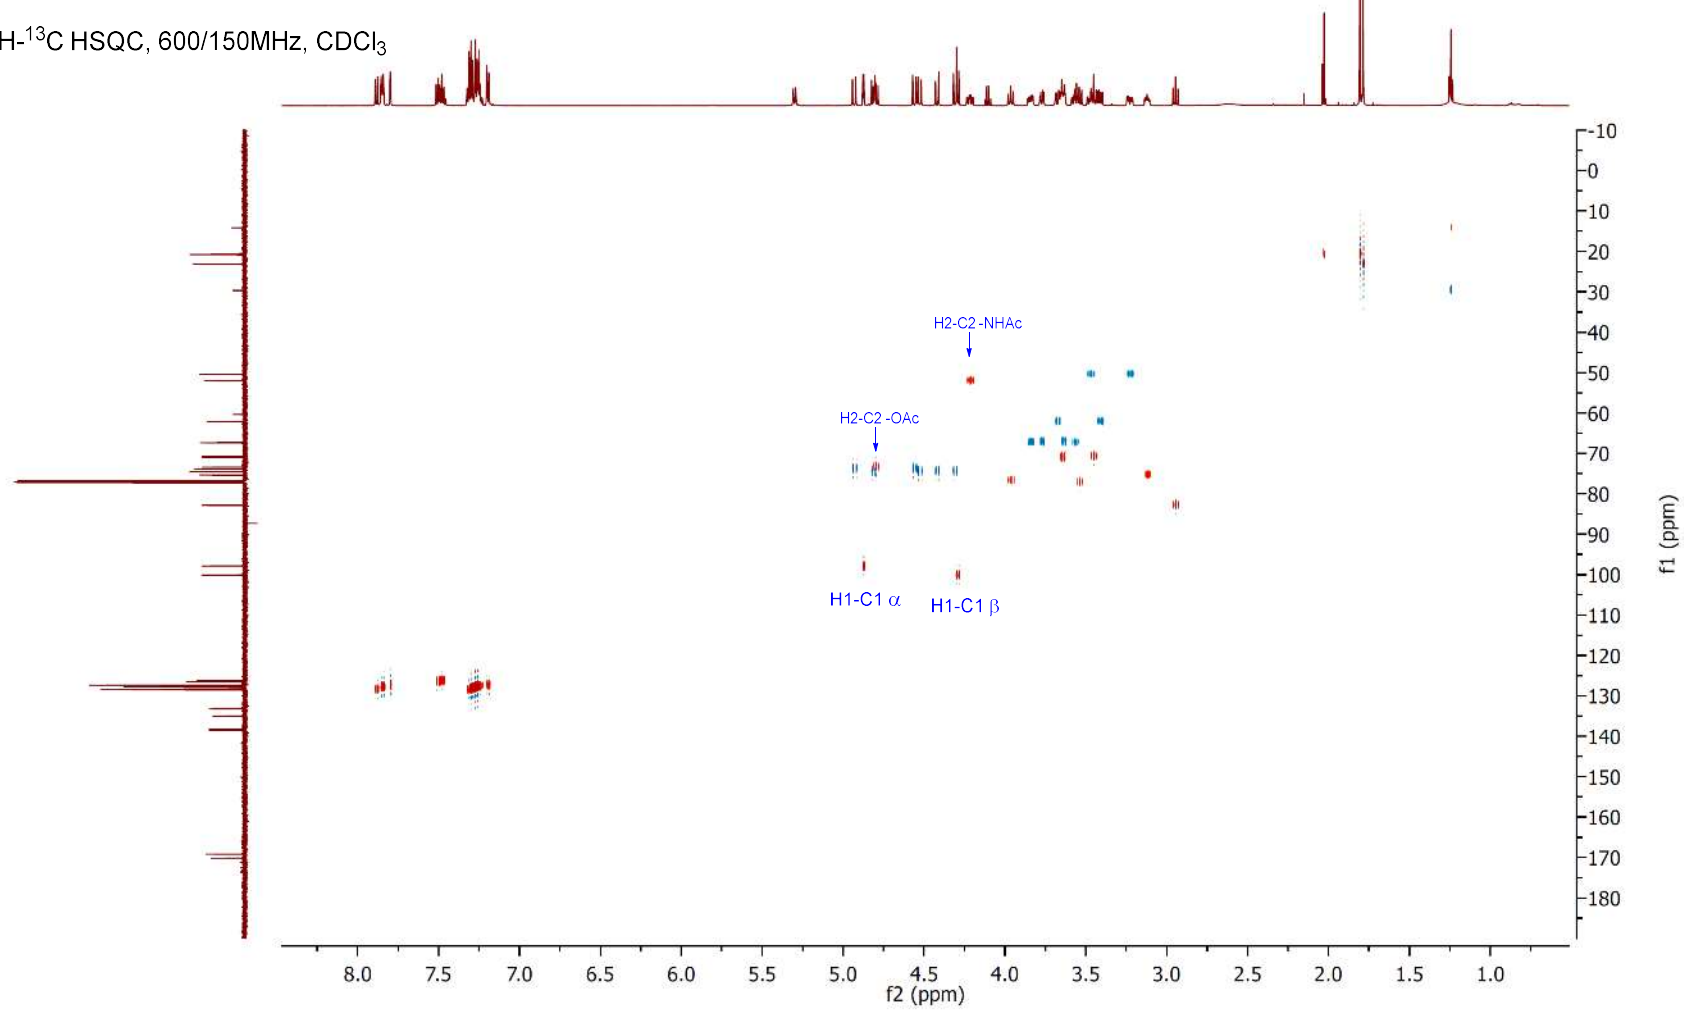

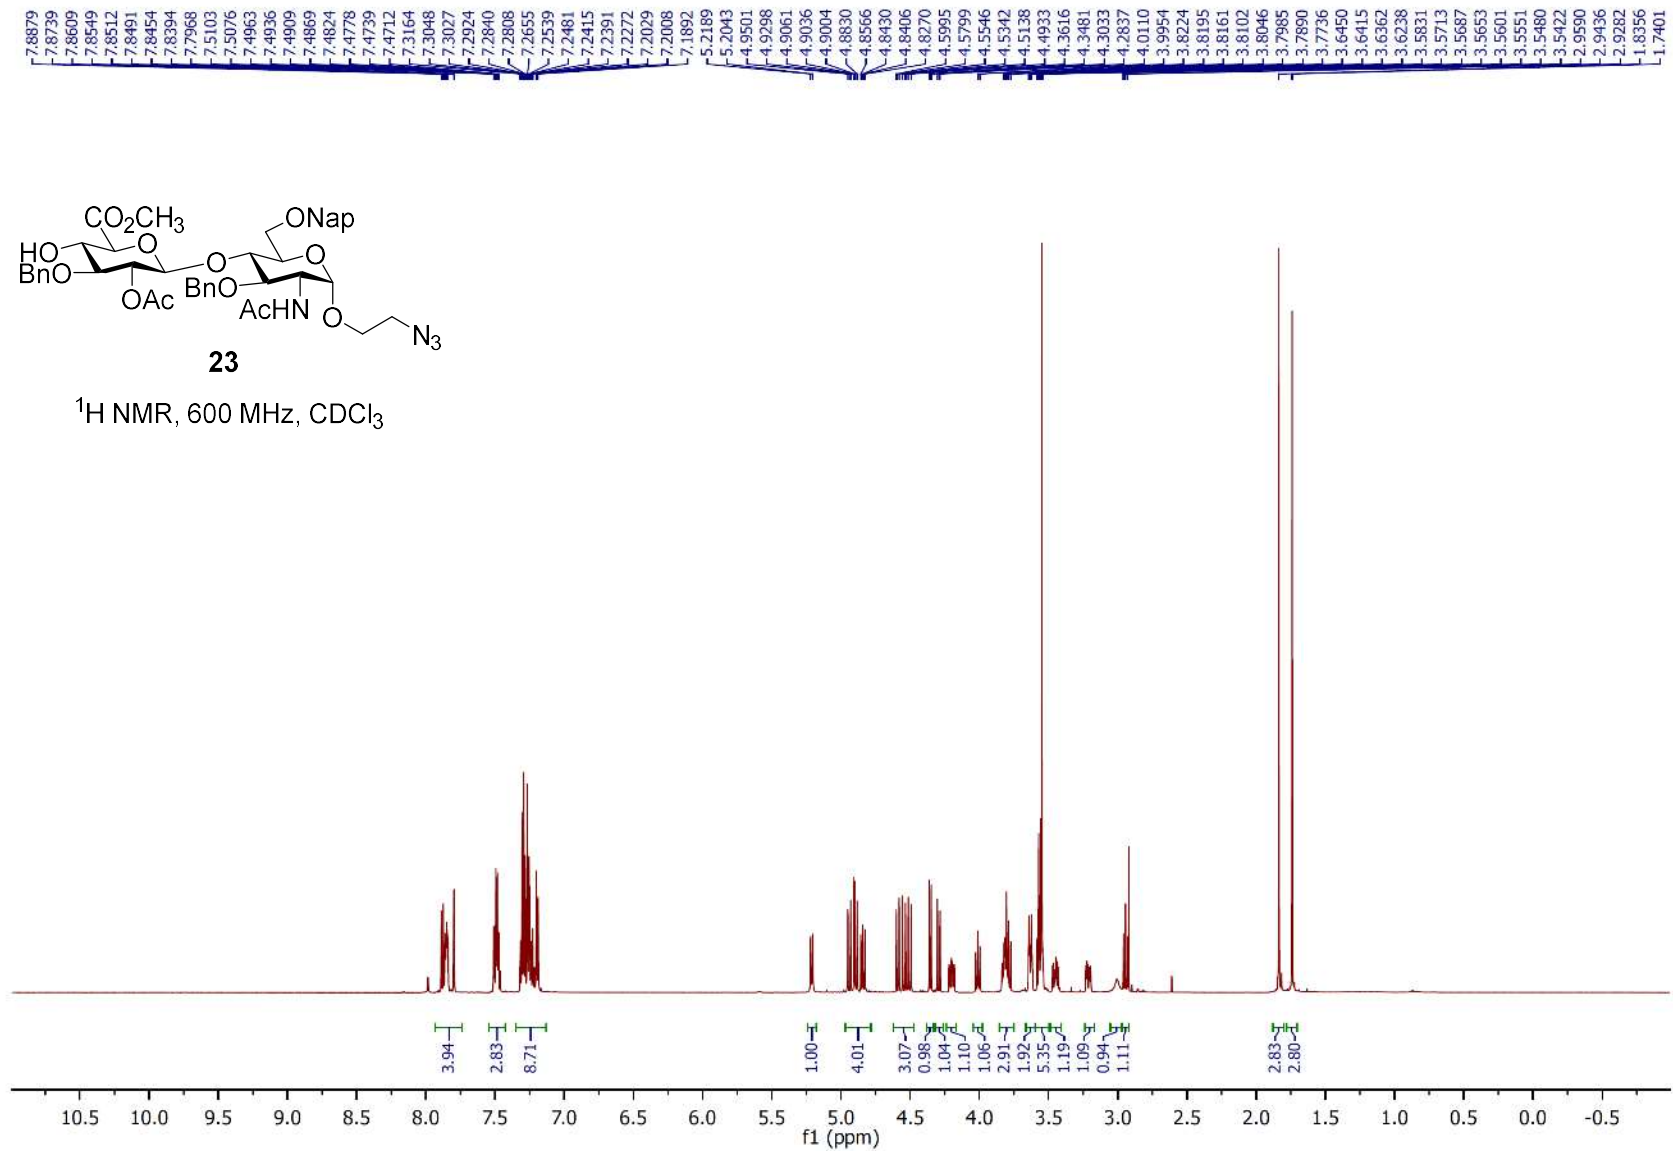

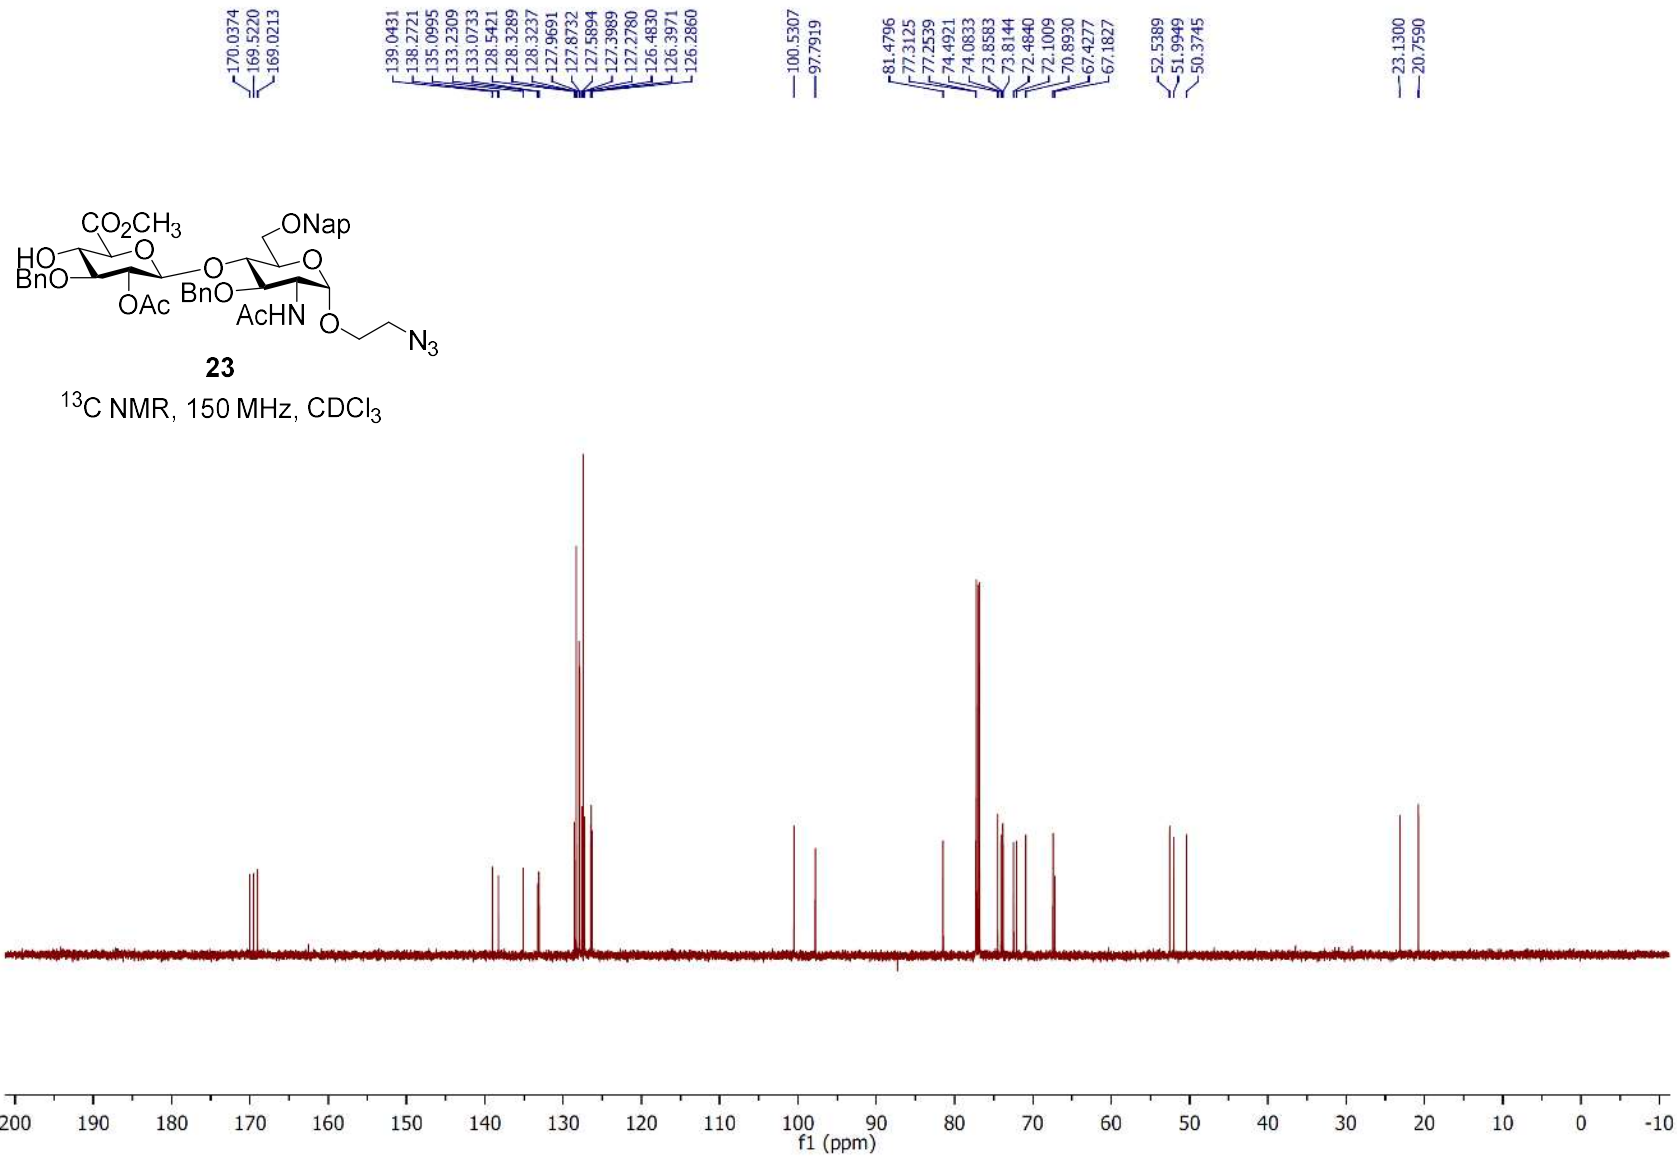

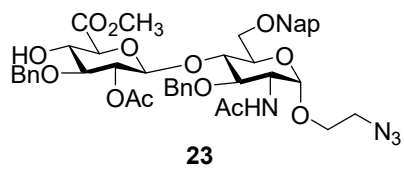

$^1\text{H}$ - $^{13}\text{C}$  HSQC, 600/150MHz,  $\text{CDCl}_3$

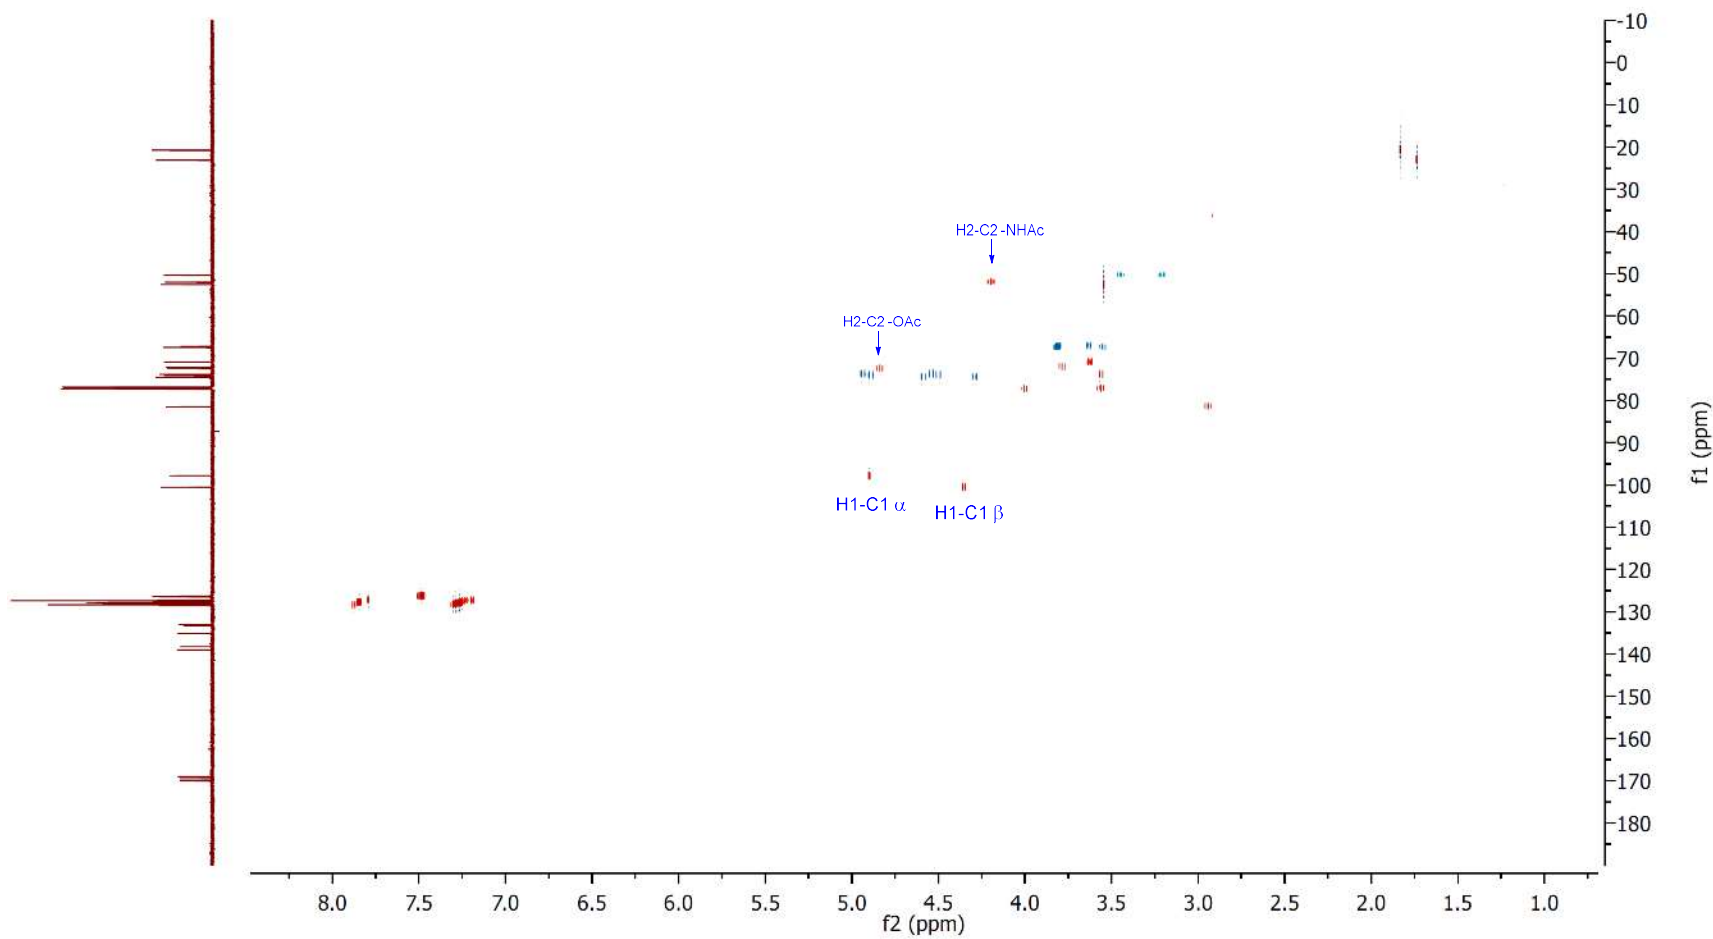



7.8487  
7.8363  
7.8223  
7.8009  
7.5416  
7.5276  
7.5251  
7.4882  
7.4655  
7.4602  
7.4563  
7.4526  
7.4472  
7.4446  
7.4349  
7.4314  
7.4215  
7.4188  
7.3737  
7.3669  
7.3632  
7.3616  
7.3379  
7.3161  
7.2873  
7.2834  
7.2762  
7.2705  
7.2599  
7.2567  
7.2470  
7.2457  
6.8806  
6.8773  
6.8695  
6.8663  
5.3103  
5.2774  
5.1286  
5.1107  
4.9701  
4.9565  
4.9548  
4.9411  
4.9197  
4.9137  
4.8845  
4.8664  
4.8462  
4.7298  
4.7100  
4.6064  
4.5864  
4.2963  
4.2908  
4.2770  
4.0490  
4.0047  
3.9886  
3.9327  
3.9157  
3.8240  
3.8183  
3.8163  
3.8023  
3.7983  
3.7363  
3.6769  
3.6039  
3.6008  
3.5446  
3.5288  
3.4399  
3.4343  
3.4229  
3.4169  
3.3933  
3.3778  
3.3624  
3.1974  
3.1802  
1.9764

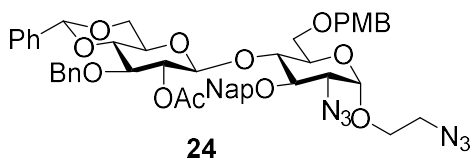

$^1\text{H NMR}$ , 600 MHz,  $\text{CDCl}_3$

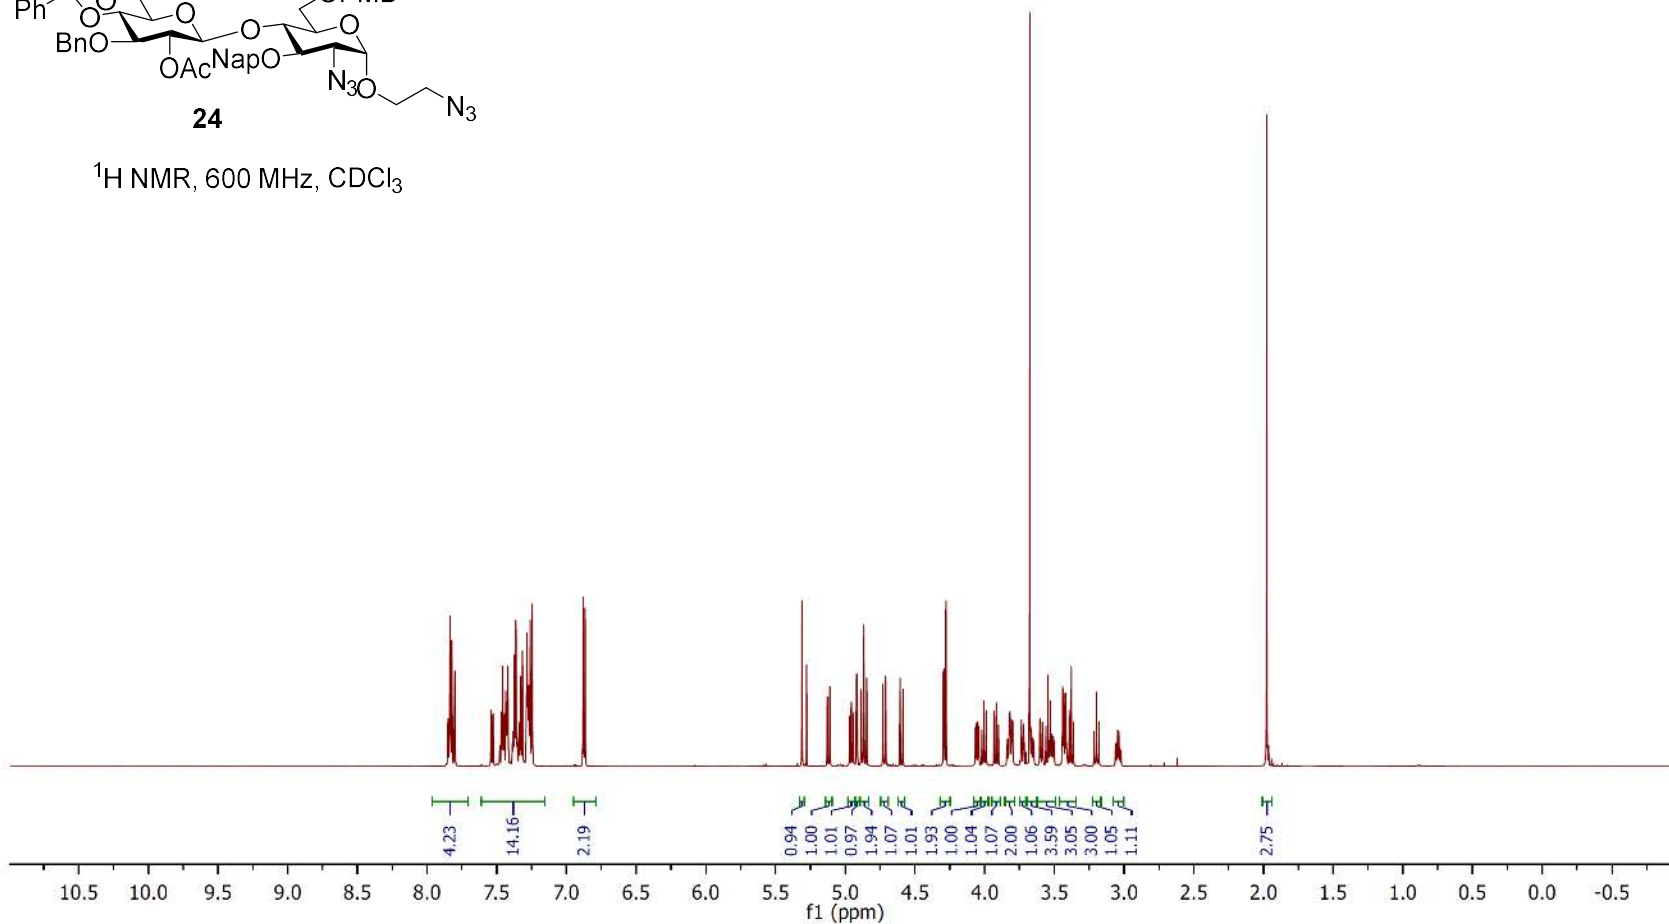

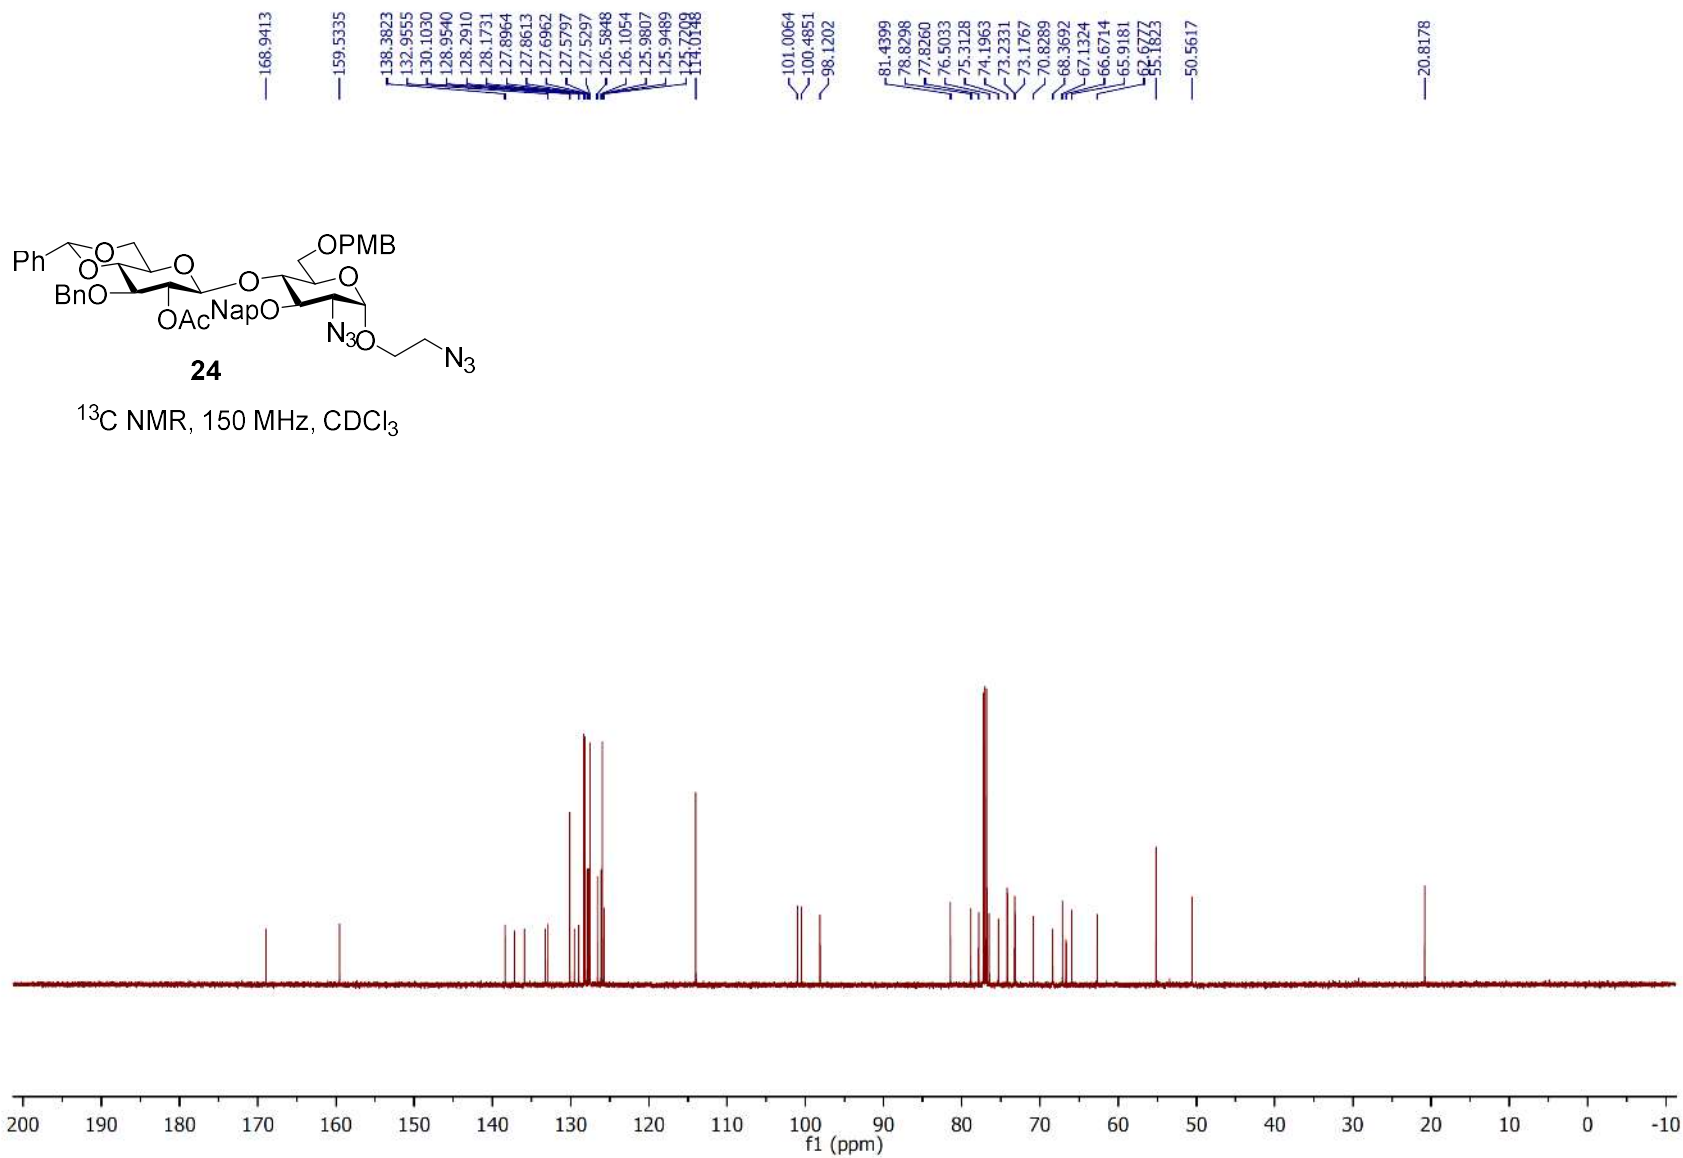

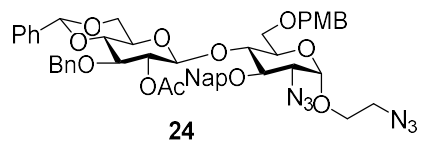

$^1\text{H}$ - $^{13}\text{C}$  HSQC, 600/150MHz,  $\text{CDCl}_3$

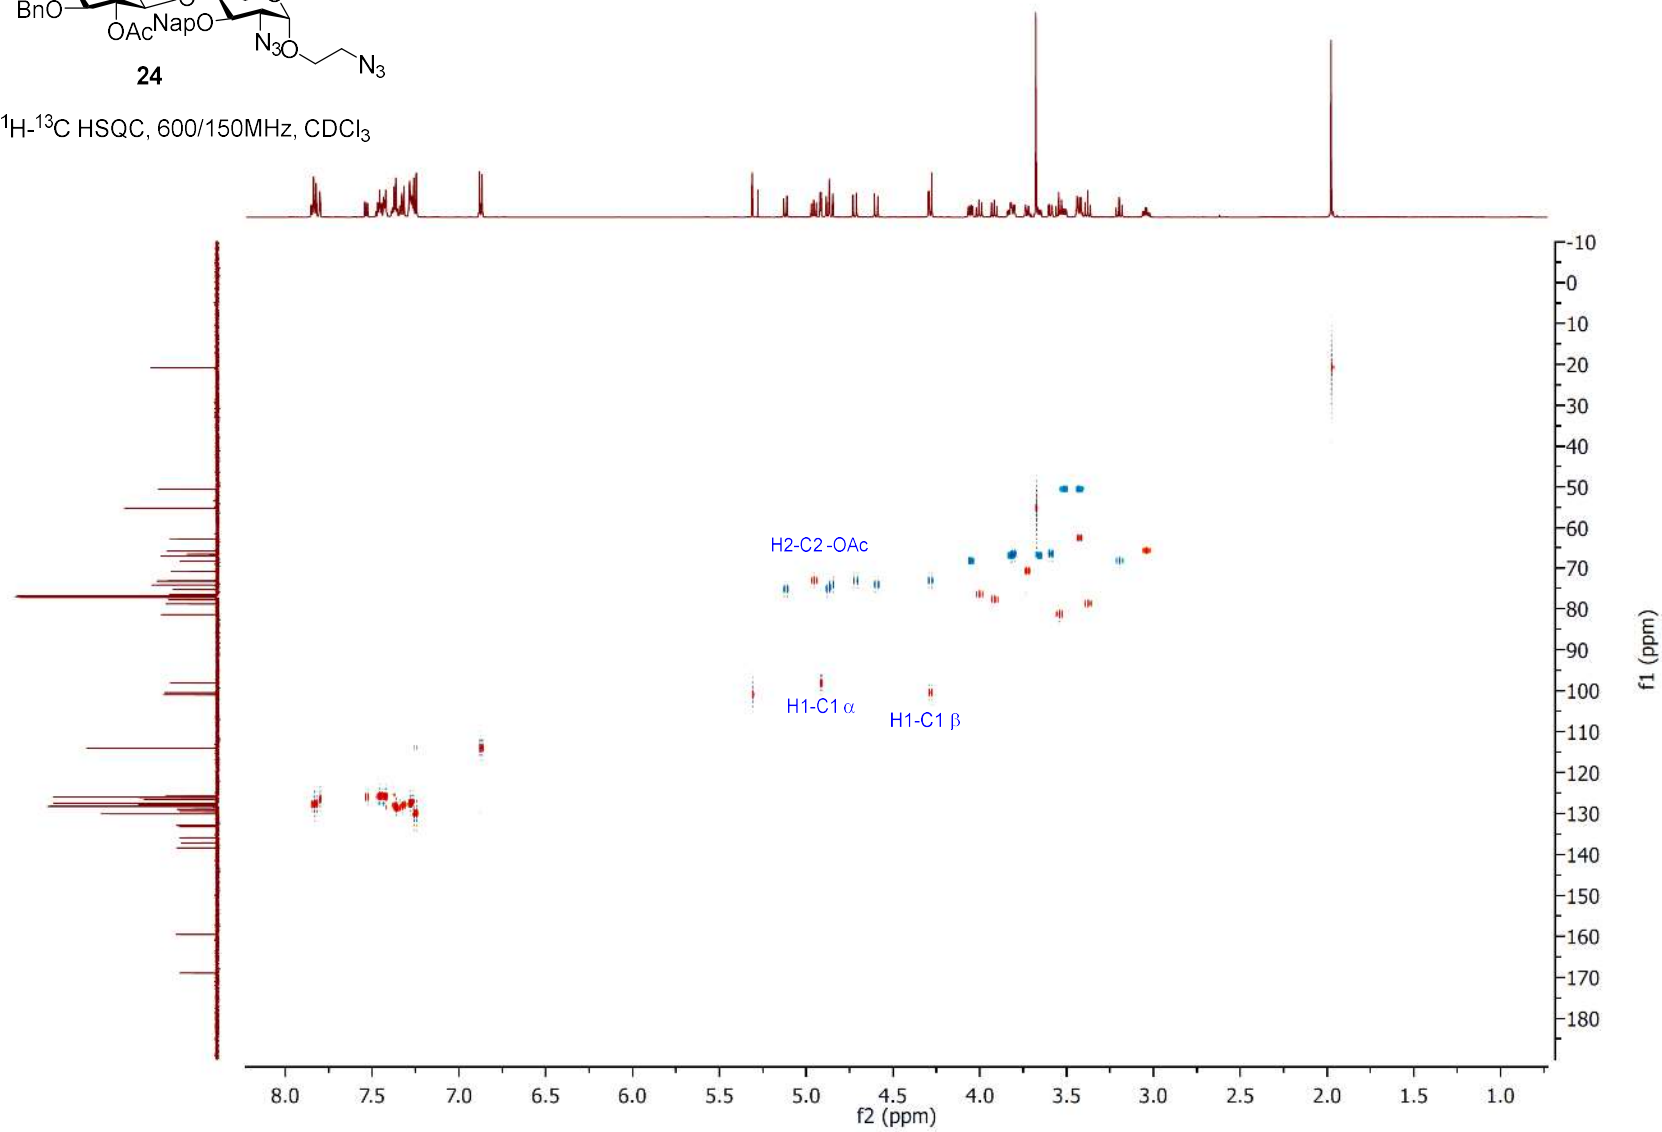

7.8132  
7.8090  
7.8000  
7.7915  
7.5008  
7.4982  
7.4867  
7.4842  
7.4467  
7.4438  
7.4406  
7.4359  
7.4309  
7.4278  
7.4250  
7.3552  
7.3432  
7.3316  
7.2976  
7.2869  
7.2760  
7.2726  
7.2472  
6.9176  
6.9143  
6.9066  
6.9033  
5.1326  
5.1140  
4.9164  
4.9138  
4.9105  
4.9001  
4.8978  
4.8841  
4.8654  
4.7284  
4.7085  
4.6294  
4.3261  
4.3062  
4.2599  
4.2464  
3.9480  
3.9324  
3.9252  
3.9089  
3.8939  
3.8200  
3.7842  
3.7798  
3.7715  
3.7666  
3.7622  
3.7495  
3.7335  
3.6558  
3.5862  
3.5831  
3.5684  
3.5655  
3.5102  
3.5053  
3.5004  
3.4980  
3.4861  
3.4806  
3.4615  
3.4461  
3.4305  
3.4265  
3.4220  
3.4164  
3.4054  
3.3994  
3.2011  
3.1912  
3.1828  
3.1712  
3.1522  
3.0559  
1.9467

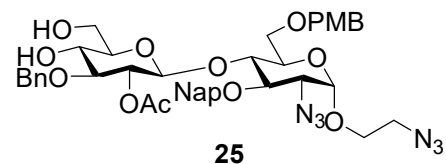

$^1\text{H NMR}$ , 600 MHz,  $\text{CDCl}_3$

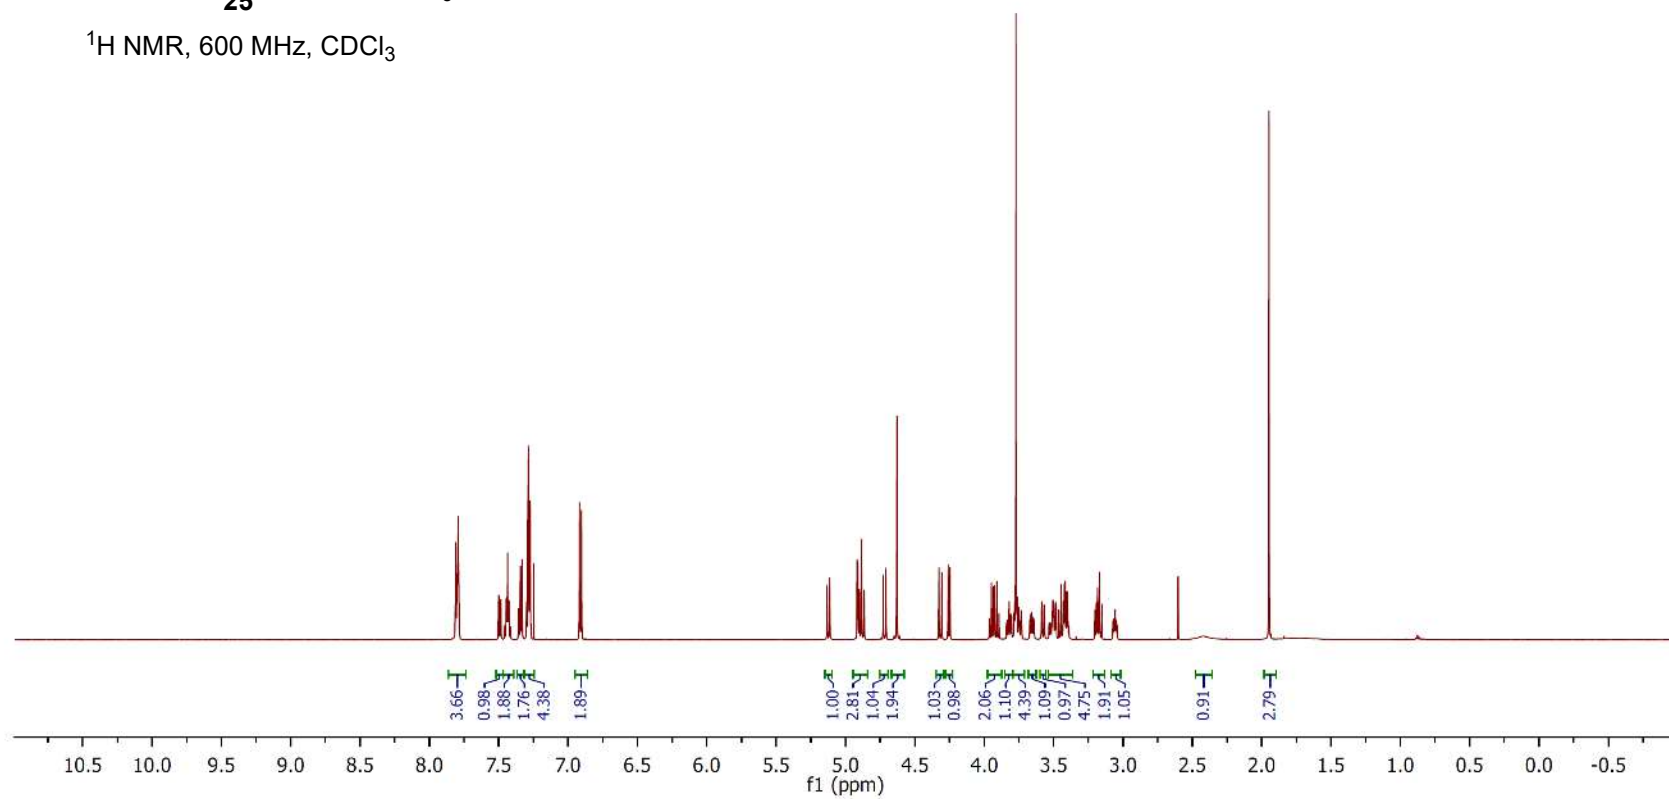

169.0966  
 159.4807  
 138.1891  
 135.7607  
 133.2448  
 132.9130  
 130.2321  
 129.4843  
 128.5703  
 128.1018  
 127.8860  
 127.8560  
 127.6932  
 127.5035  
 126.0794  
 126.0479  
 125.8043  
 125.4847  
 114.0707

100.0687  
 98.1370

82.9698  
 77.6631  
 76.5911  
 75.0477  
 74.5667  
 73.3140  
 73.2561  
 70.8348  
 70.8061  
 67.1266  
 65.8398  
 50.5534

20.8757

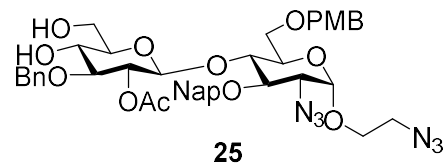

$^{13}\text{C}$  NMR, 150 MHz,  $\text{CDCl}_3$

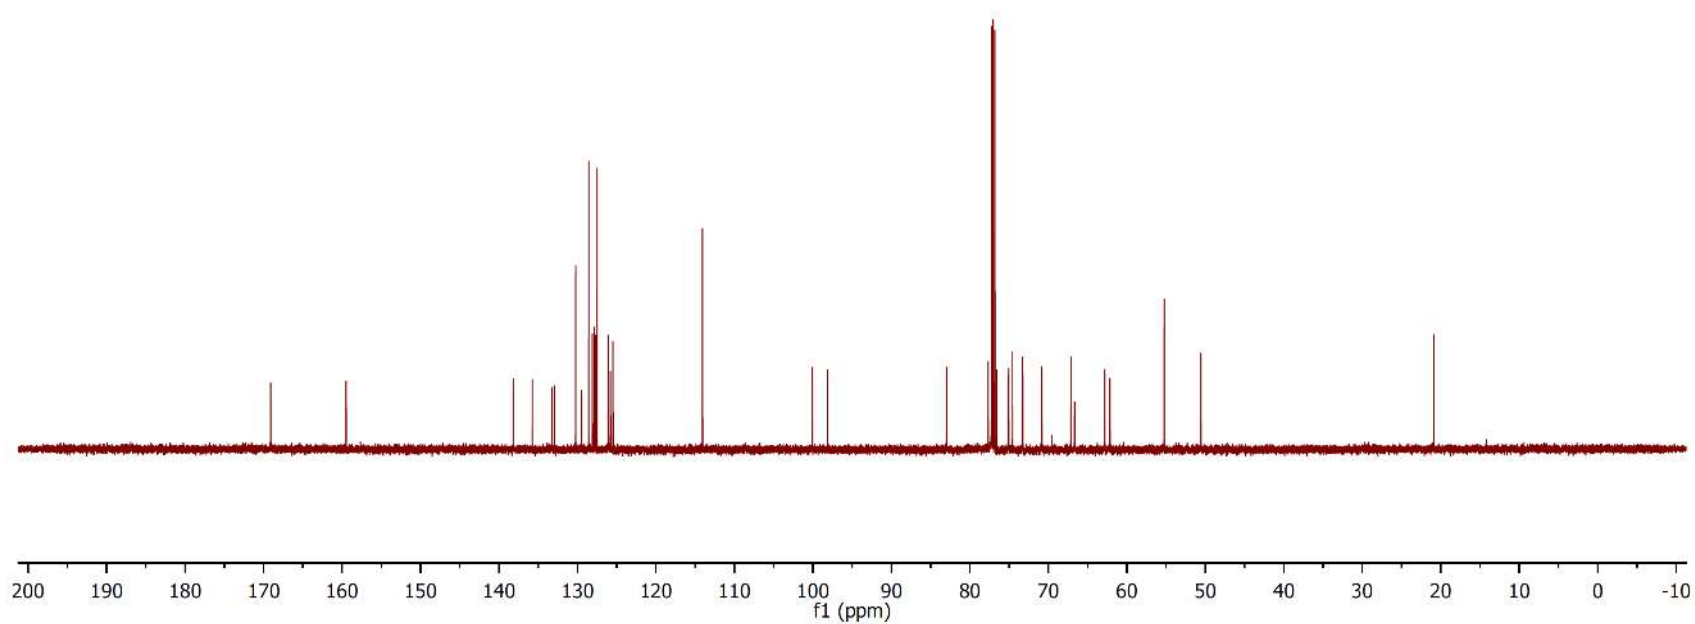

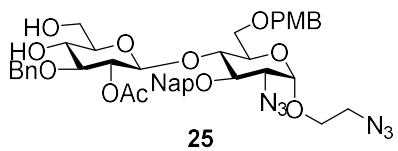

$^1\text{H}$ - $^{13}\text{C}$  HSQC, 600/150MHz,  $\text{CDCl}_3$

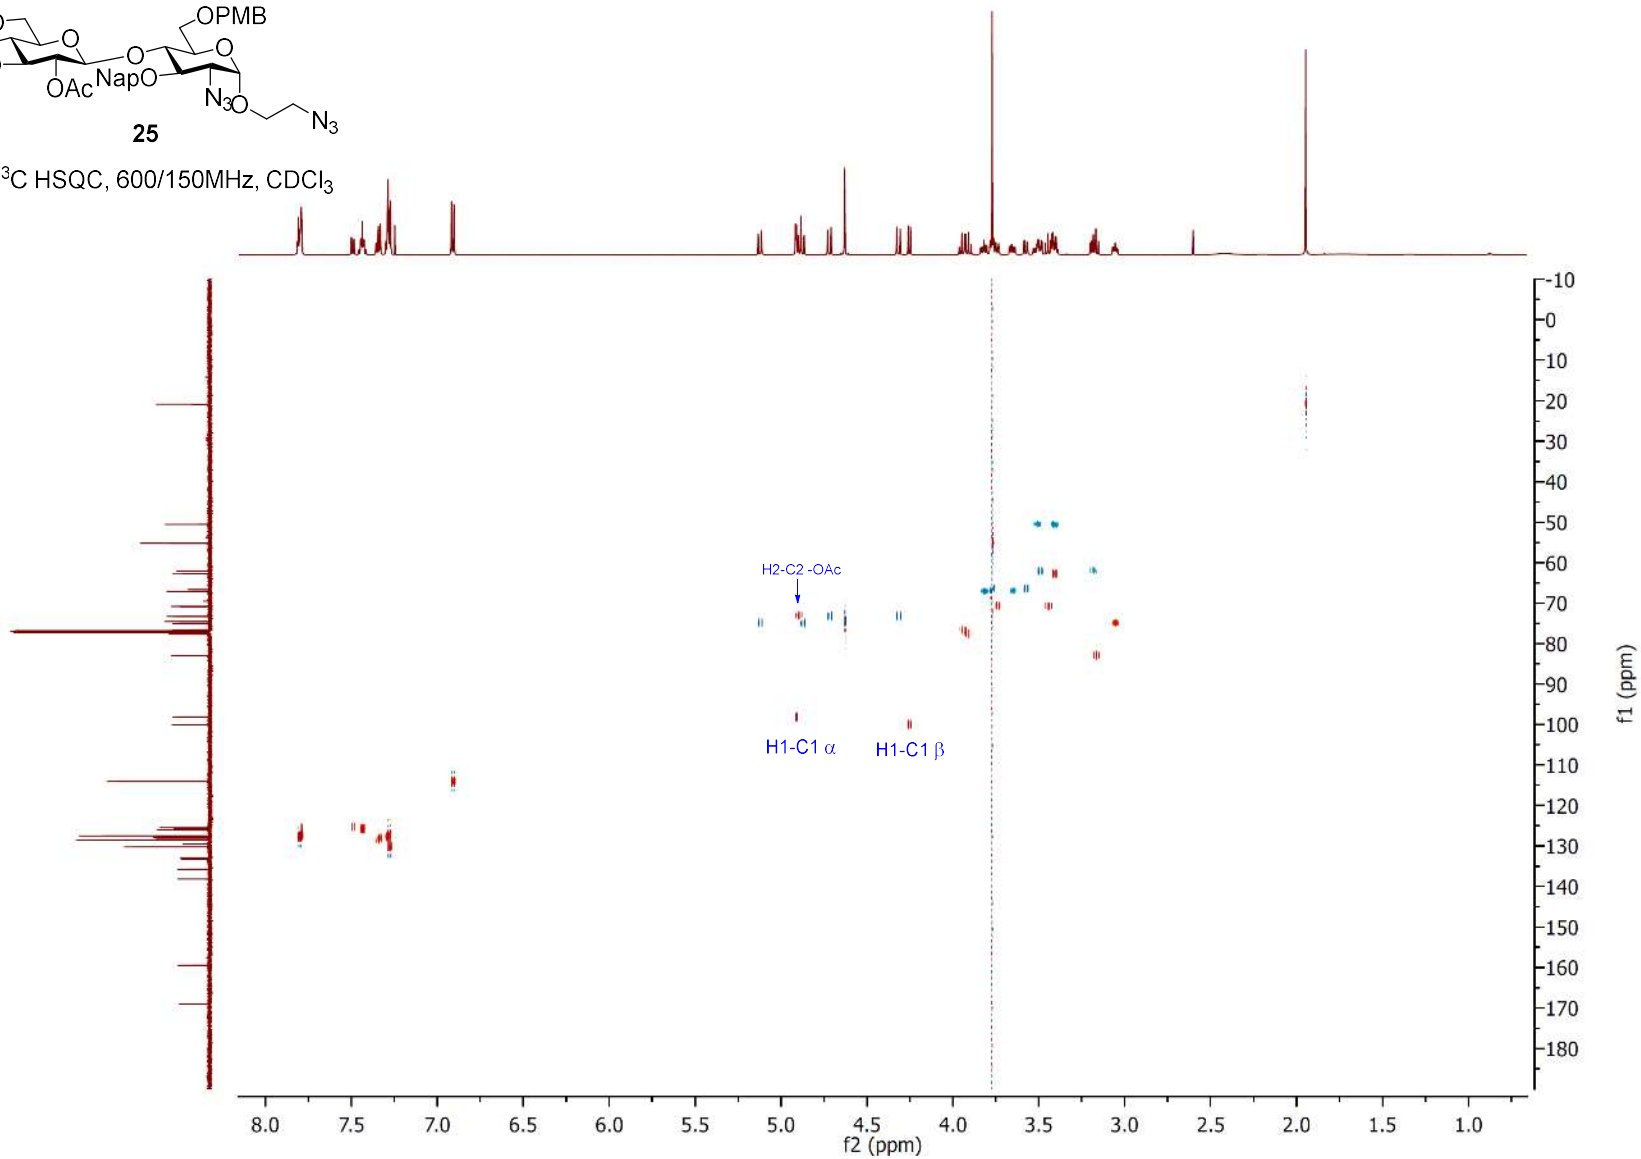

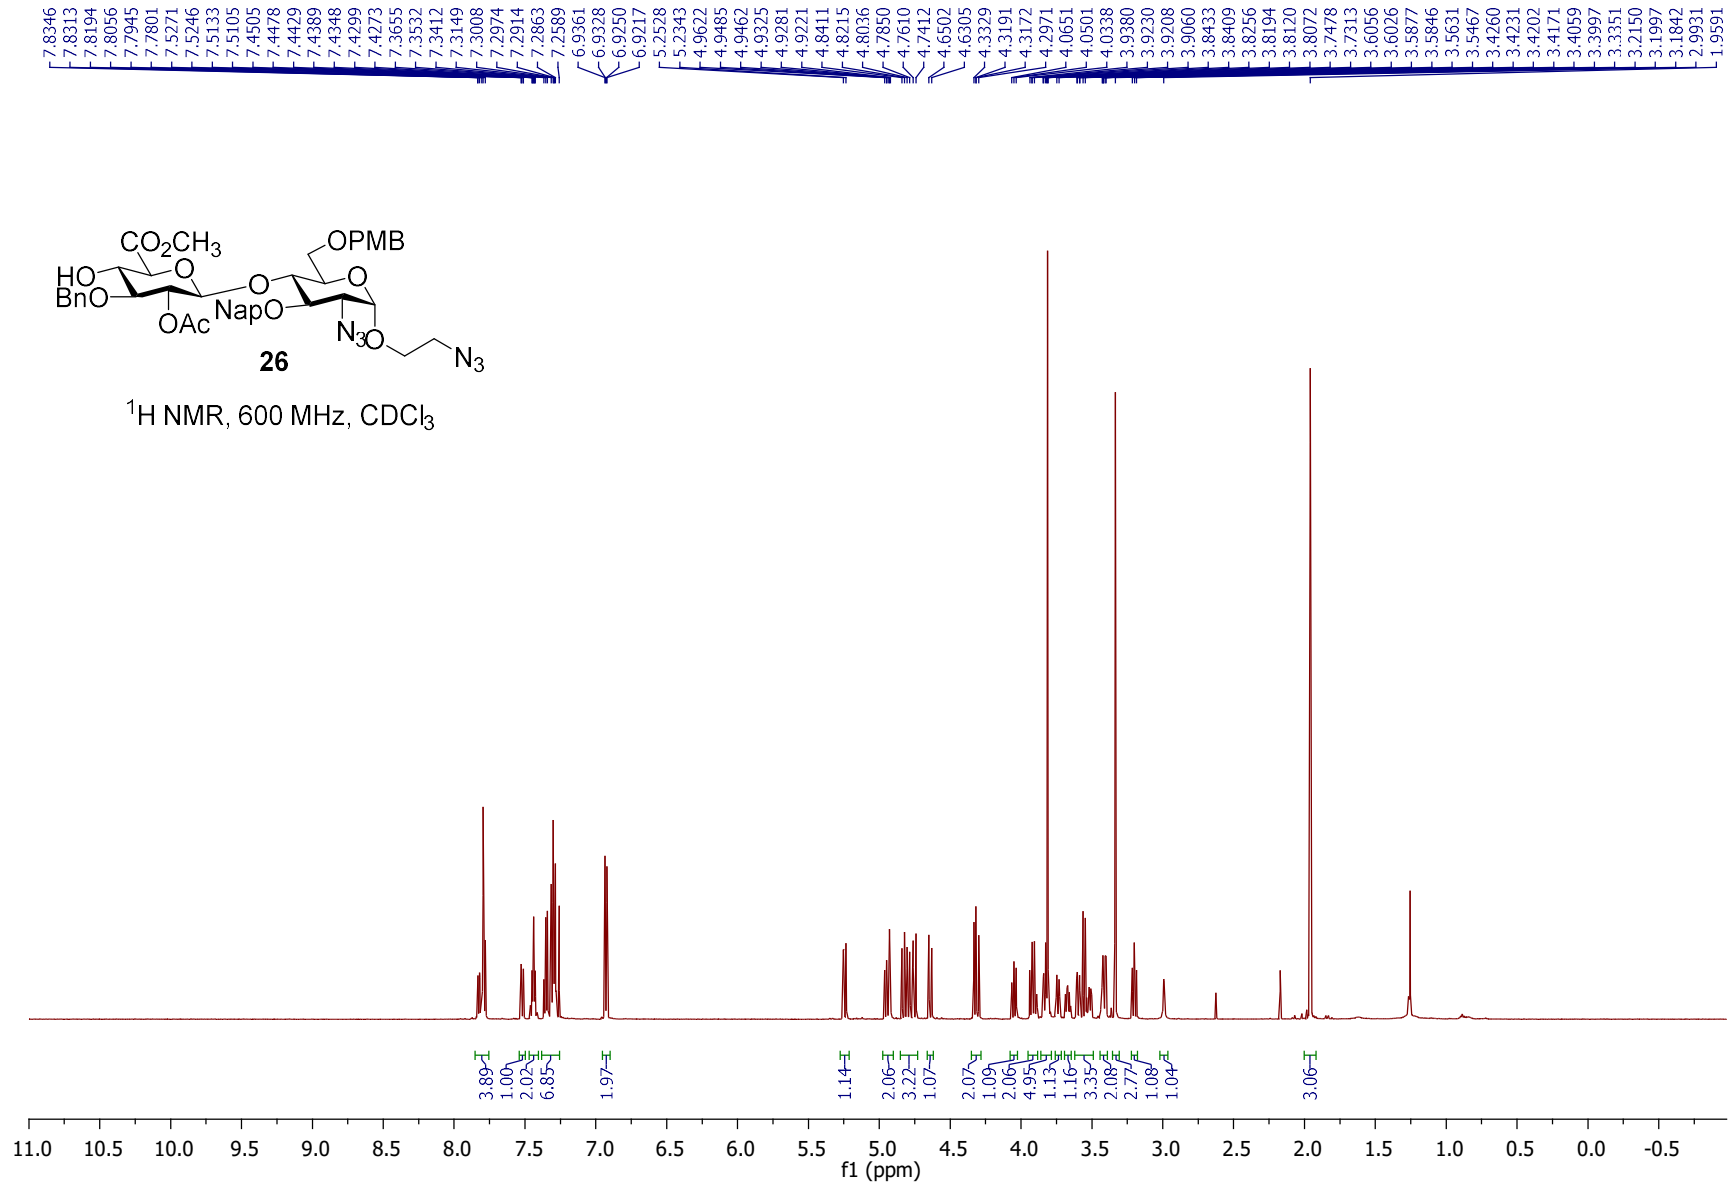

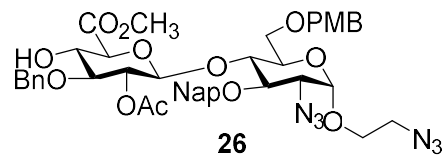

$^{13}\text{C}$  NMR, 150 MHz,  $\text{CDCl}_3$

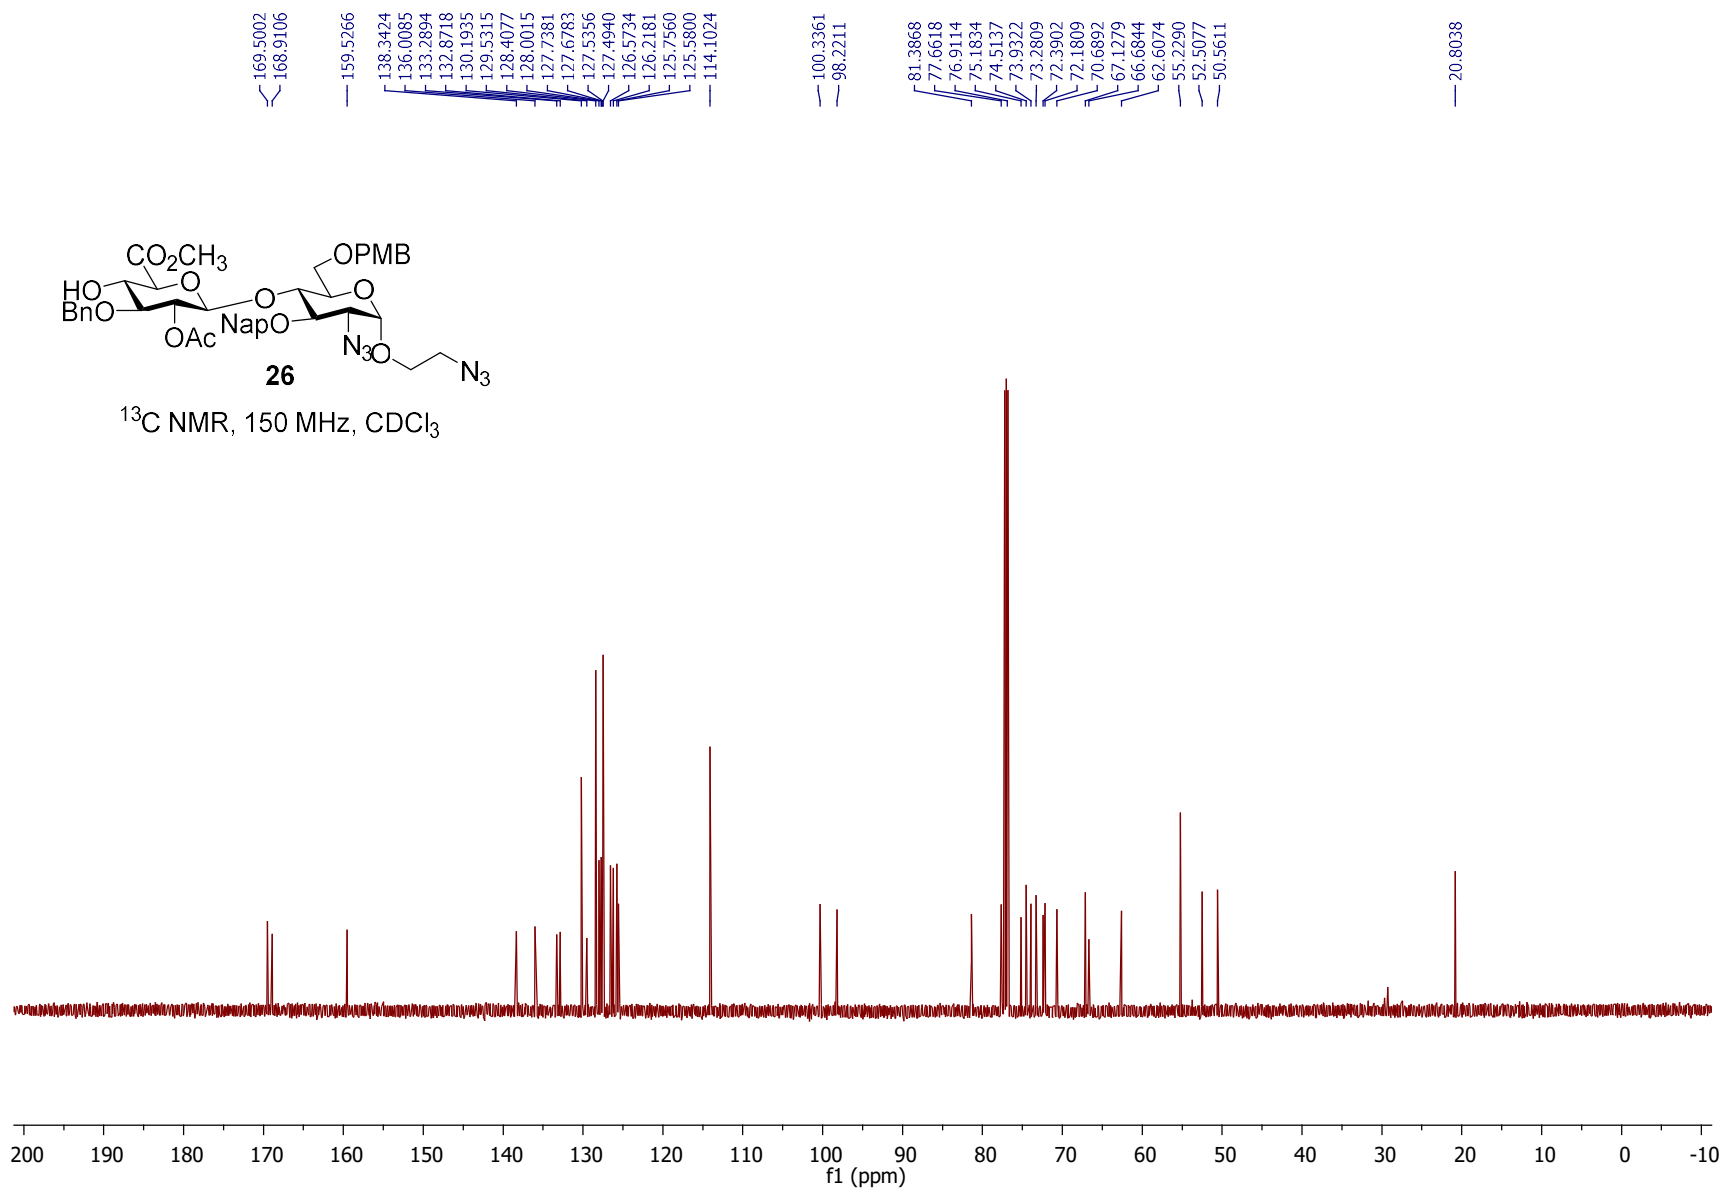



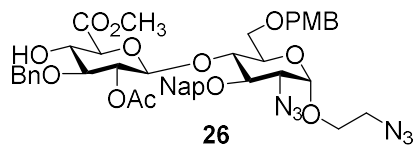

<sup>1</sup>H-<sup>1</sup>H COSY, 600 MHz, CDCl<sub>3</sub>

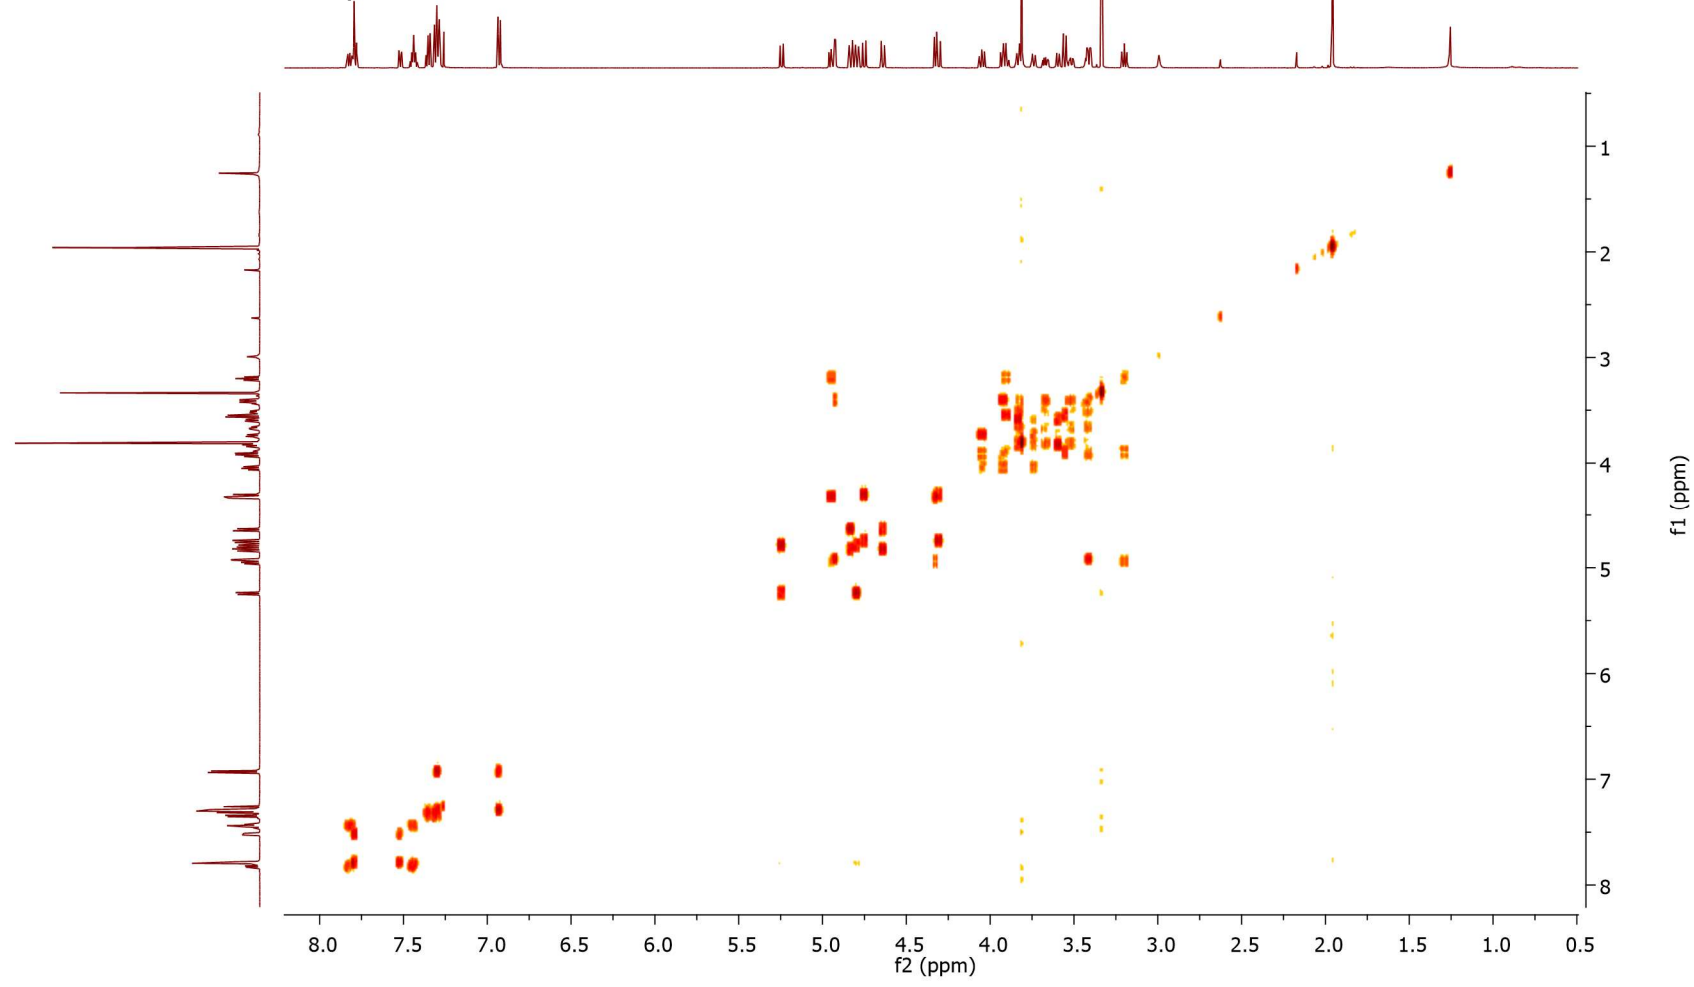

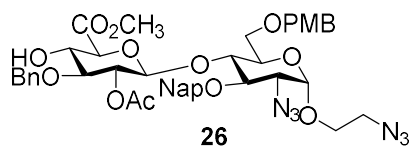

$^1\text{H}$ - $^{13}\text{C}$  HSQC, 600/150MHz,  $\text{CDCl}_3$

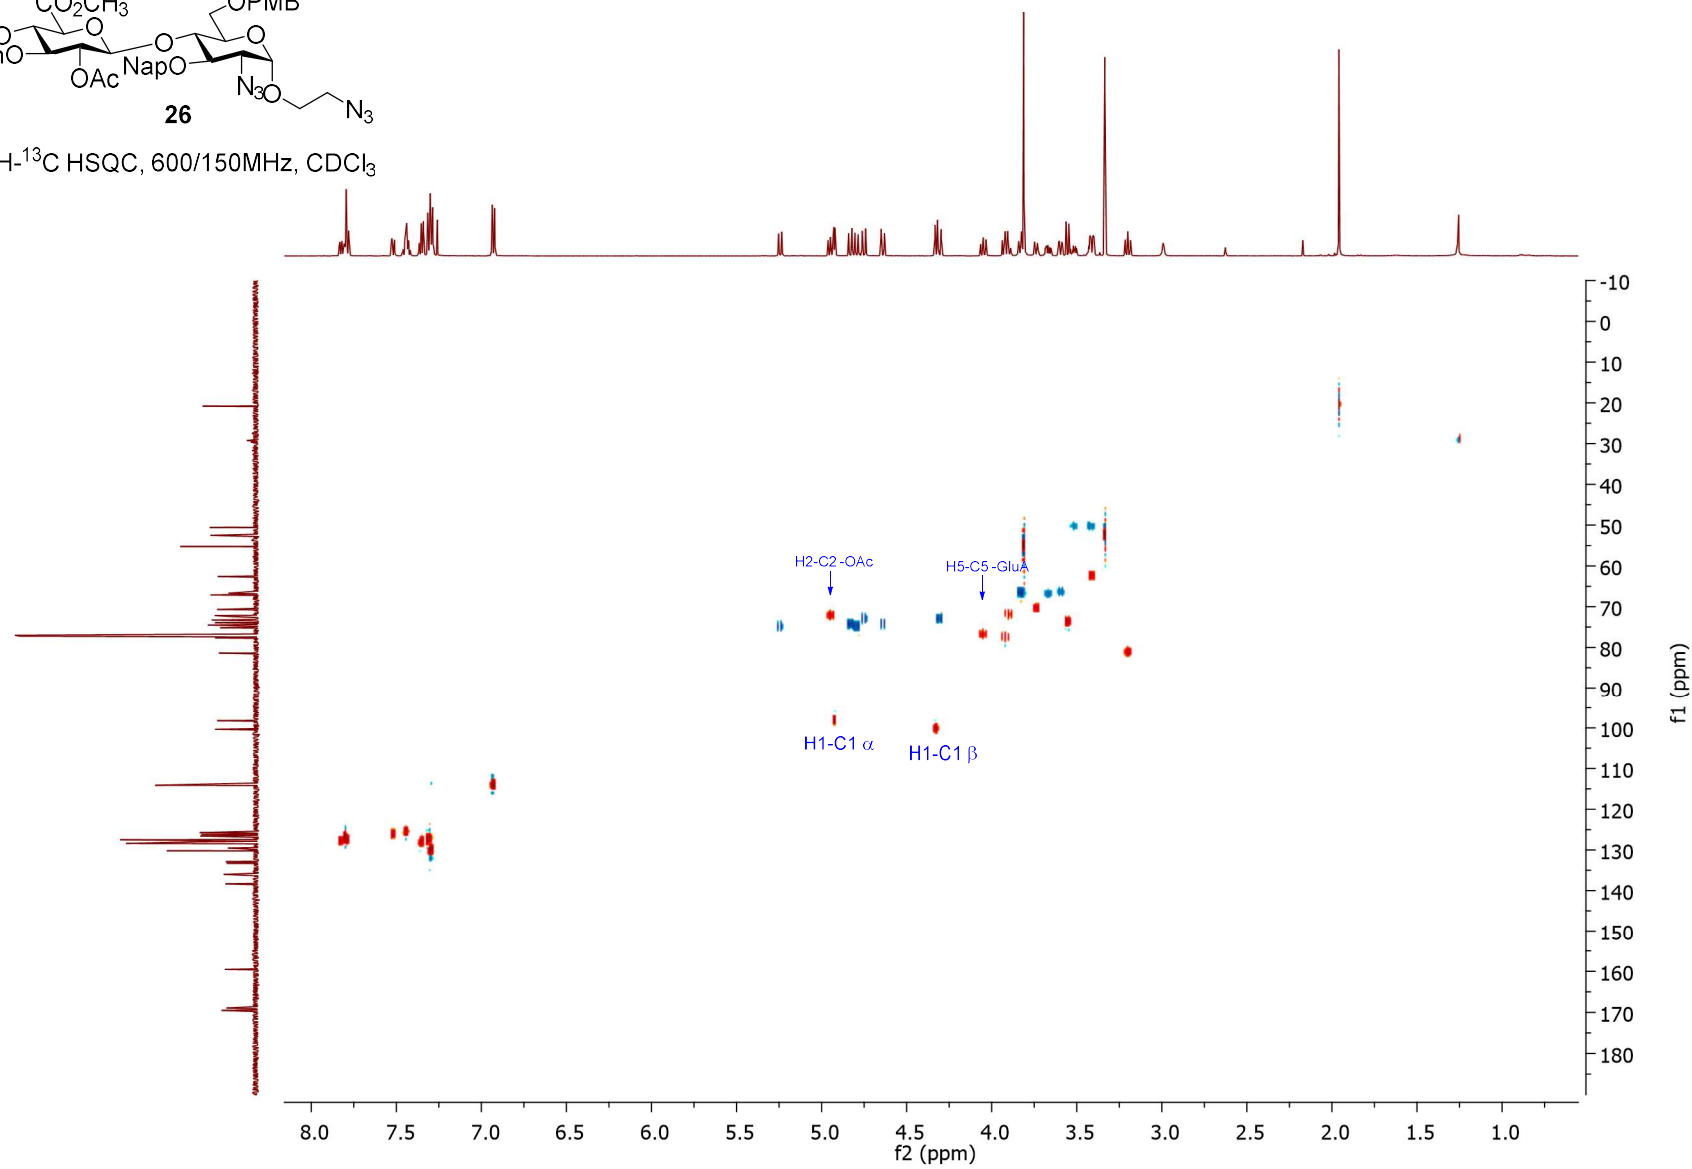

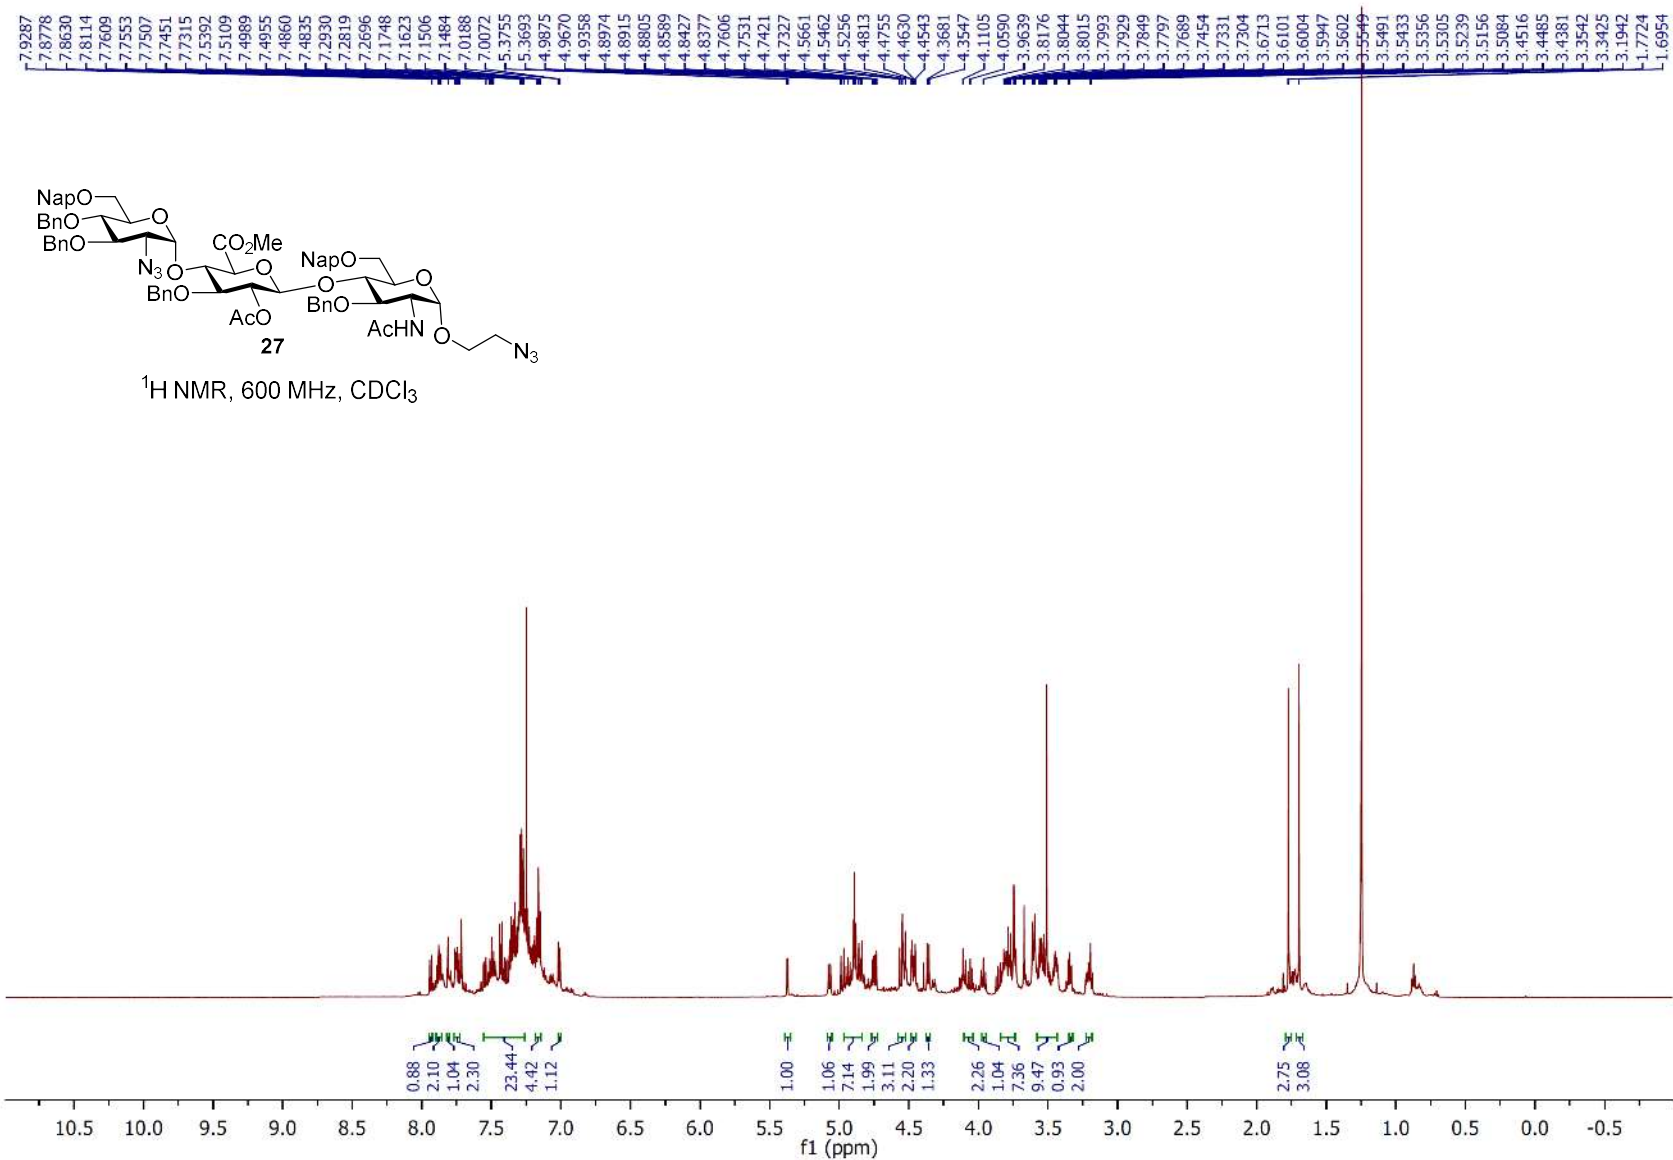

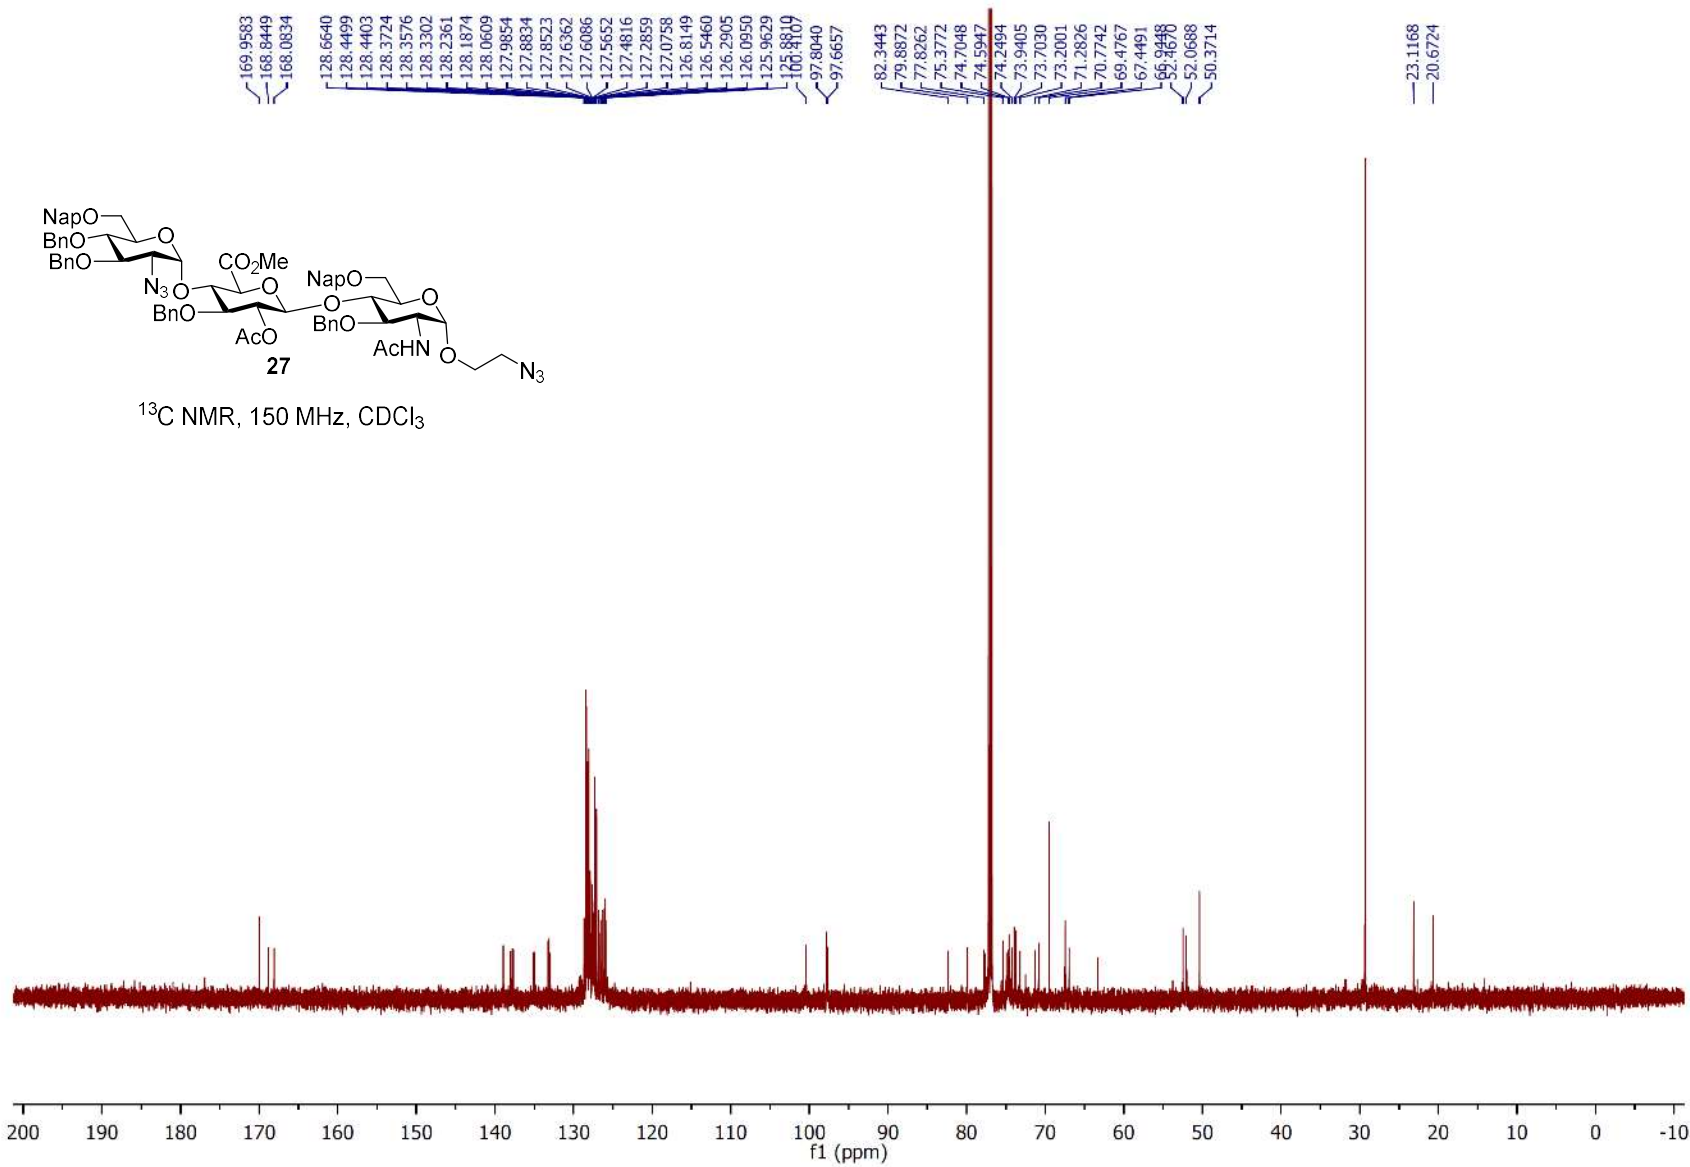

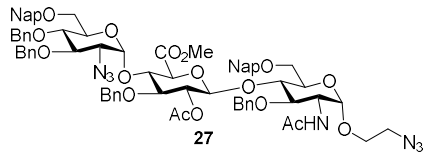

$^1\text{H}$ - $^{13}\text{C}$  HSQC, 600/150MHz,  $\text{CDCl}_3$

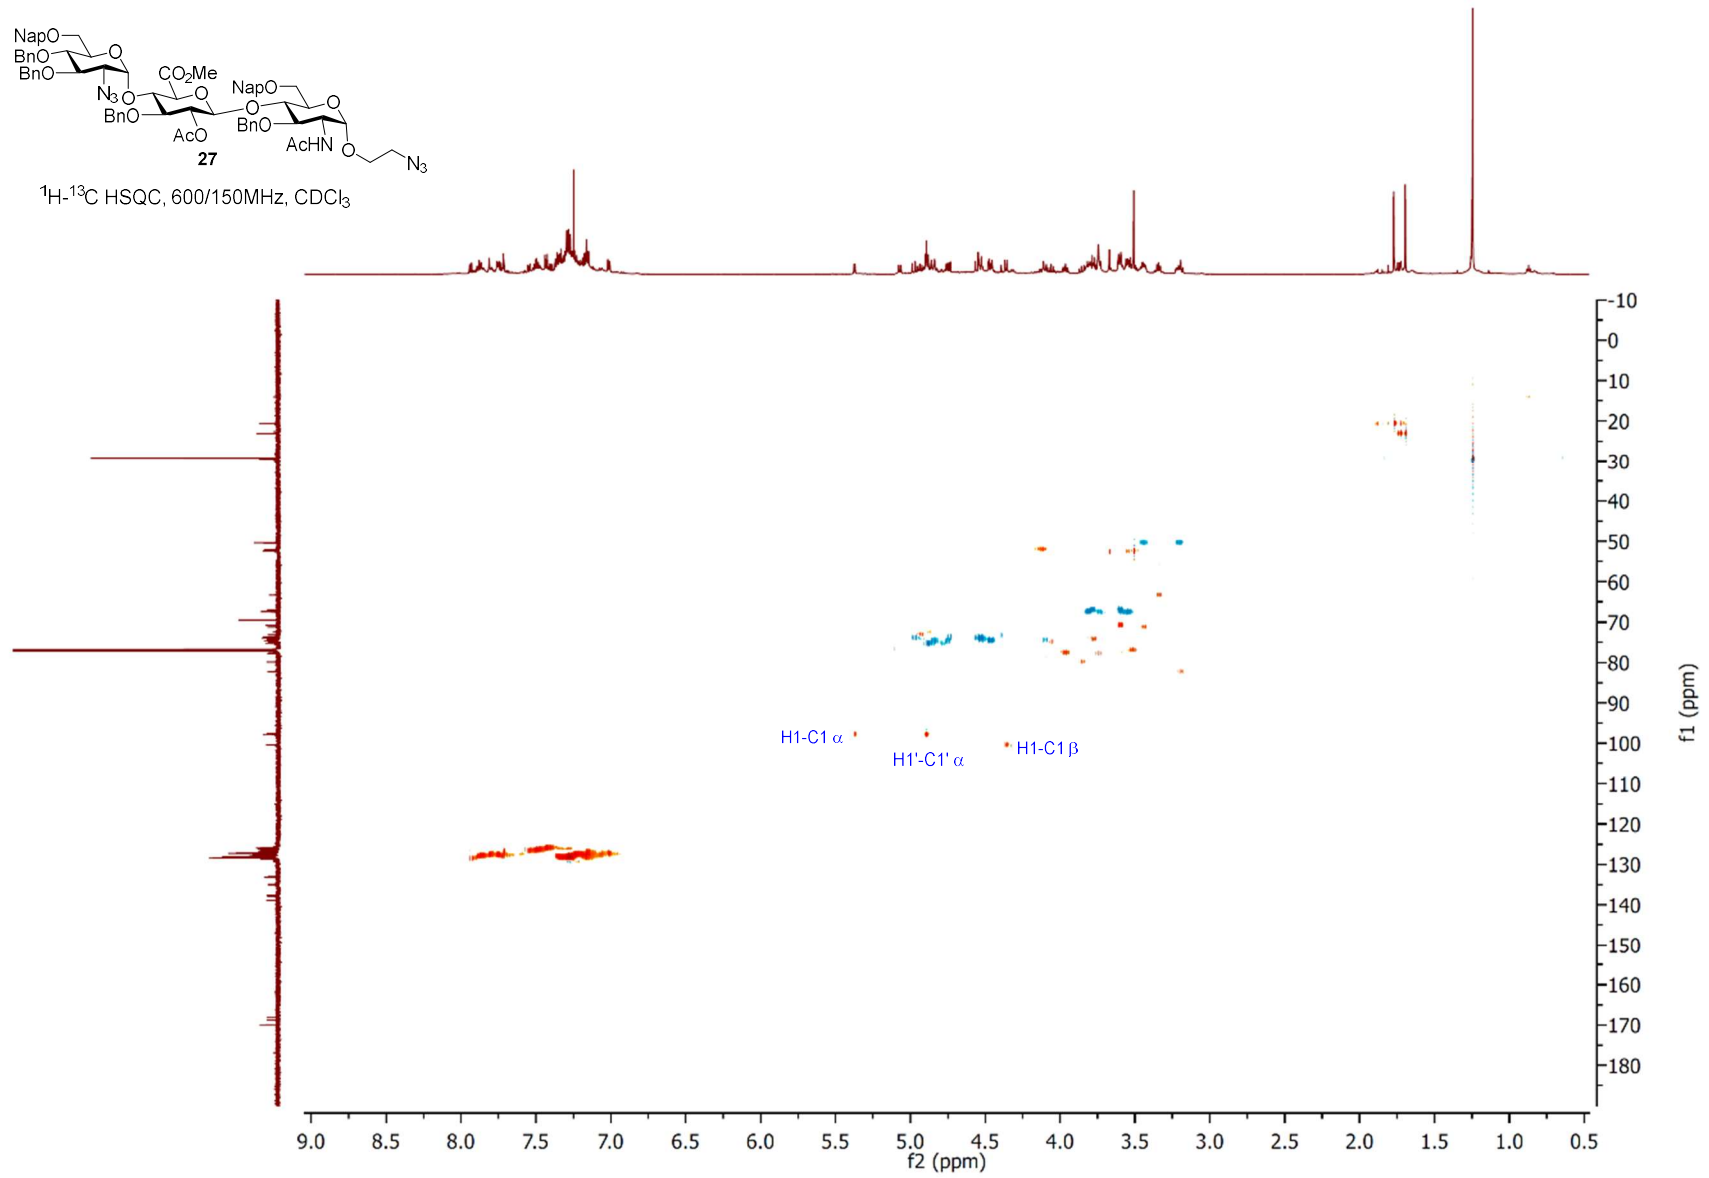

7.9483  
7.9343  
7.8788  
7.8171  
7.5024  
7.4991  
7.3824  
7.3803  
7.3778  
7.3750  
7.3673  
7.3635  
7.3460  
7.3341  
7.3316  
7.3214  
7.3114  
7.2991  
7.2950  
7.2924  
7.2873  
7.2838  
7.2811  
7.2780  
7.2759  
7.2711  
7.2685  
7.2464  
7.2425  
7.2403  
7.2378  
7.2336  
7.2314  
7.2282  
7.1698  
7.1667  
7.1566  
7.1544  
7.1419  
7.1397  
7.1281  
5.3416  
5.3354  
5.0528  
5.0347  
4.9894  
4.9691  
4.9131  
4.9104  
4.9077  
4.9022  
4.8847  
4.7858  
4.7874  
4.5902  
4.5795  
4.5702  
4.5613  
4.5500  
4.5407  
4.5223  
4.4900  
4.4717  
4.4382  
4.4180  
4.3755  
4.3621  
4.0640  
4.0487  
3.8583  
3.8465  
3.8413  
3.8292  
3.7607  
3.7446  
3.7293  
3.7092  
3.4666  
3.4607  
3.3417  
3.3353  
3.1281  
1.7615

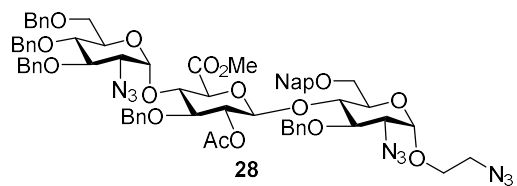

<sup>1</sup>H NMR, 600 MHz, CDCl<sub>3</sub>

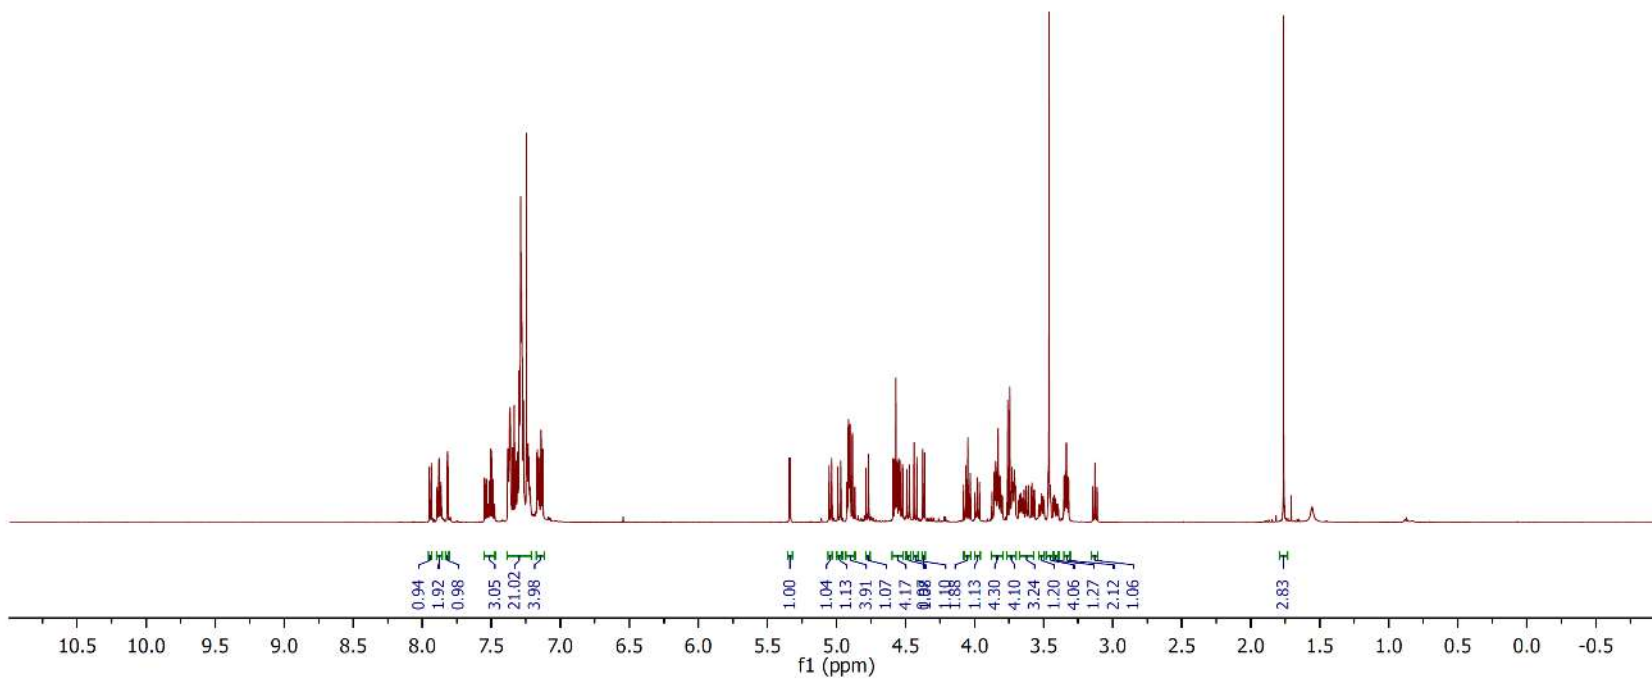

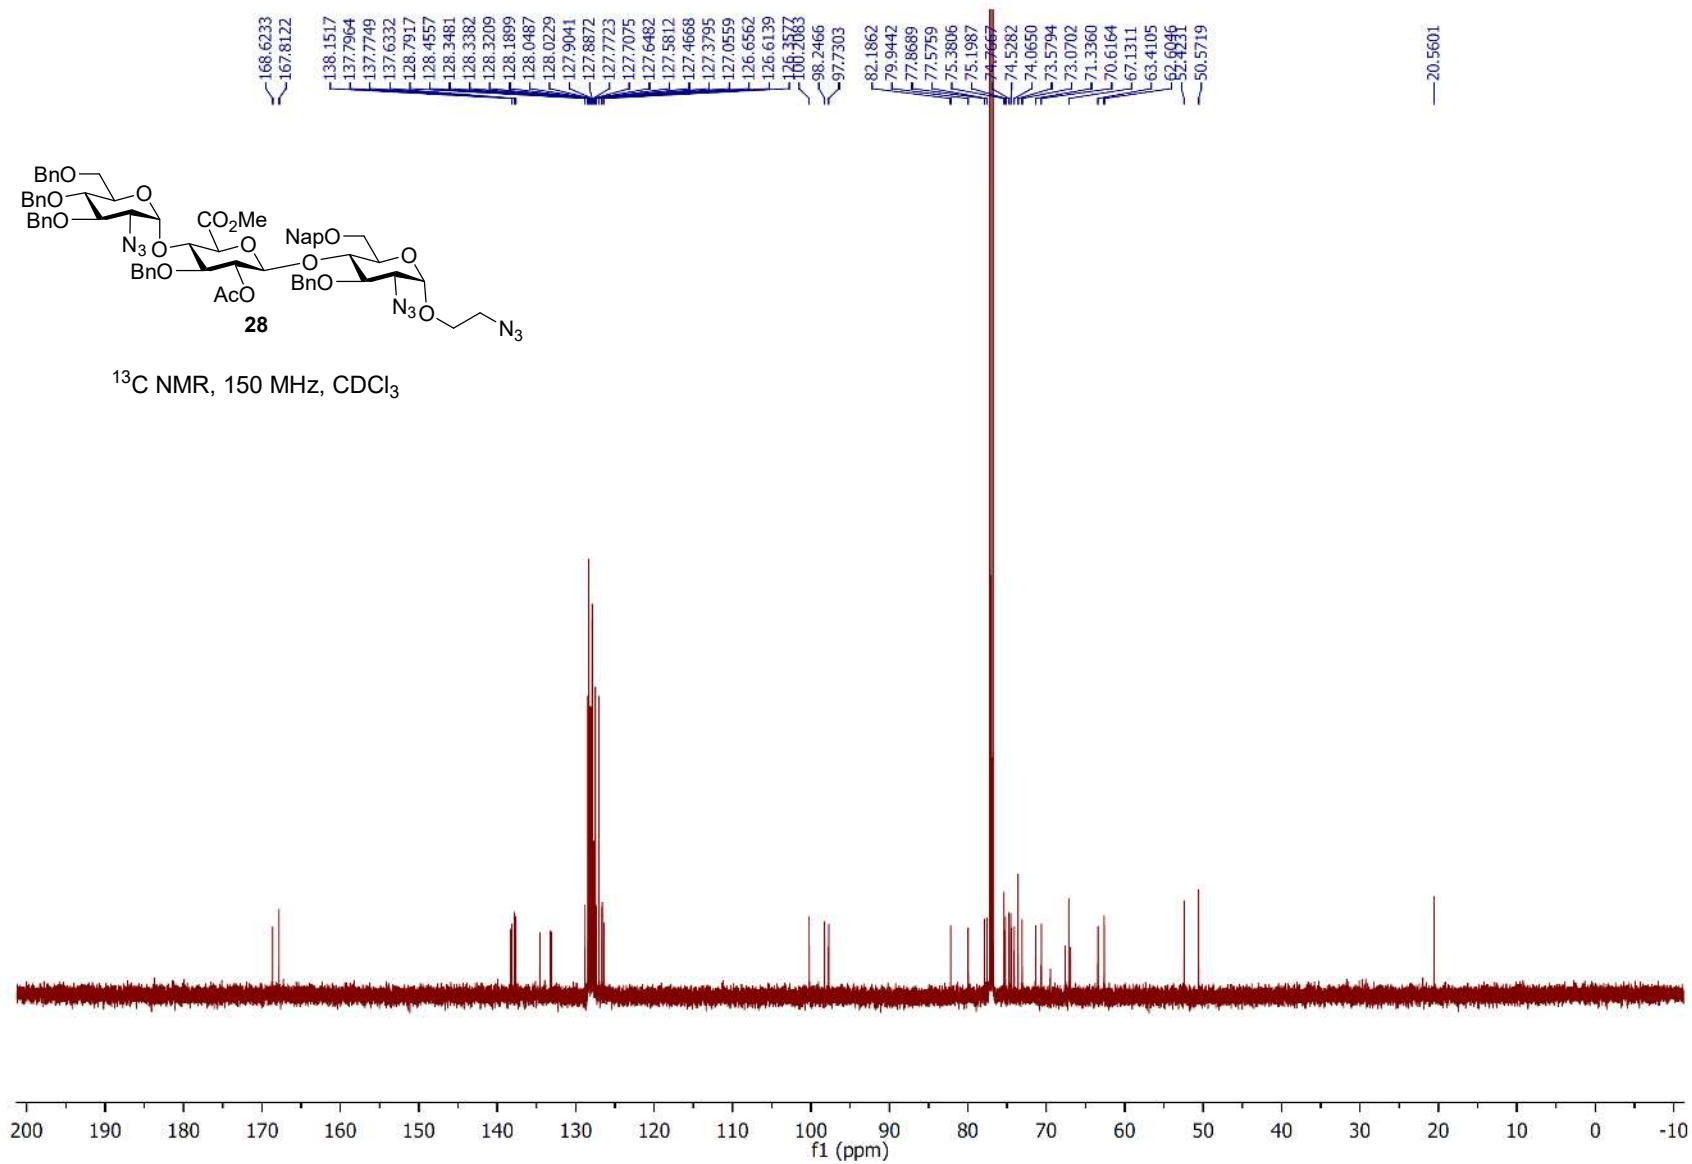

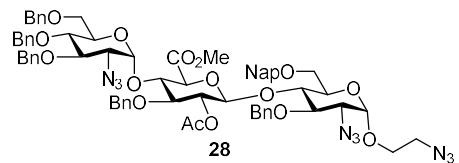

$^1\text{H}$ - $^{13}\text{C}$  HSQC, 600/150MHz,  $\text{CDCl}_3$

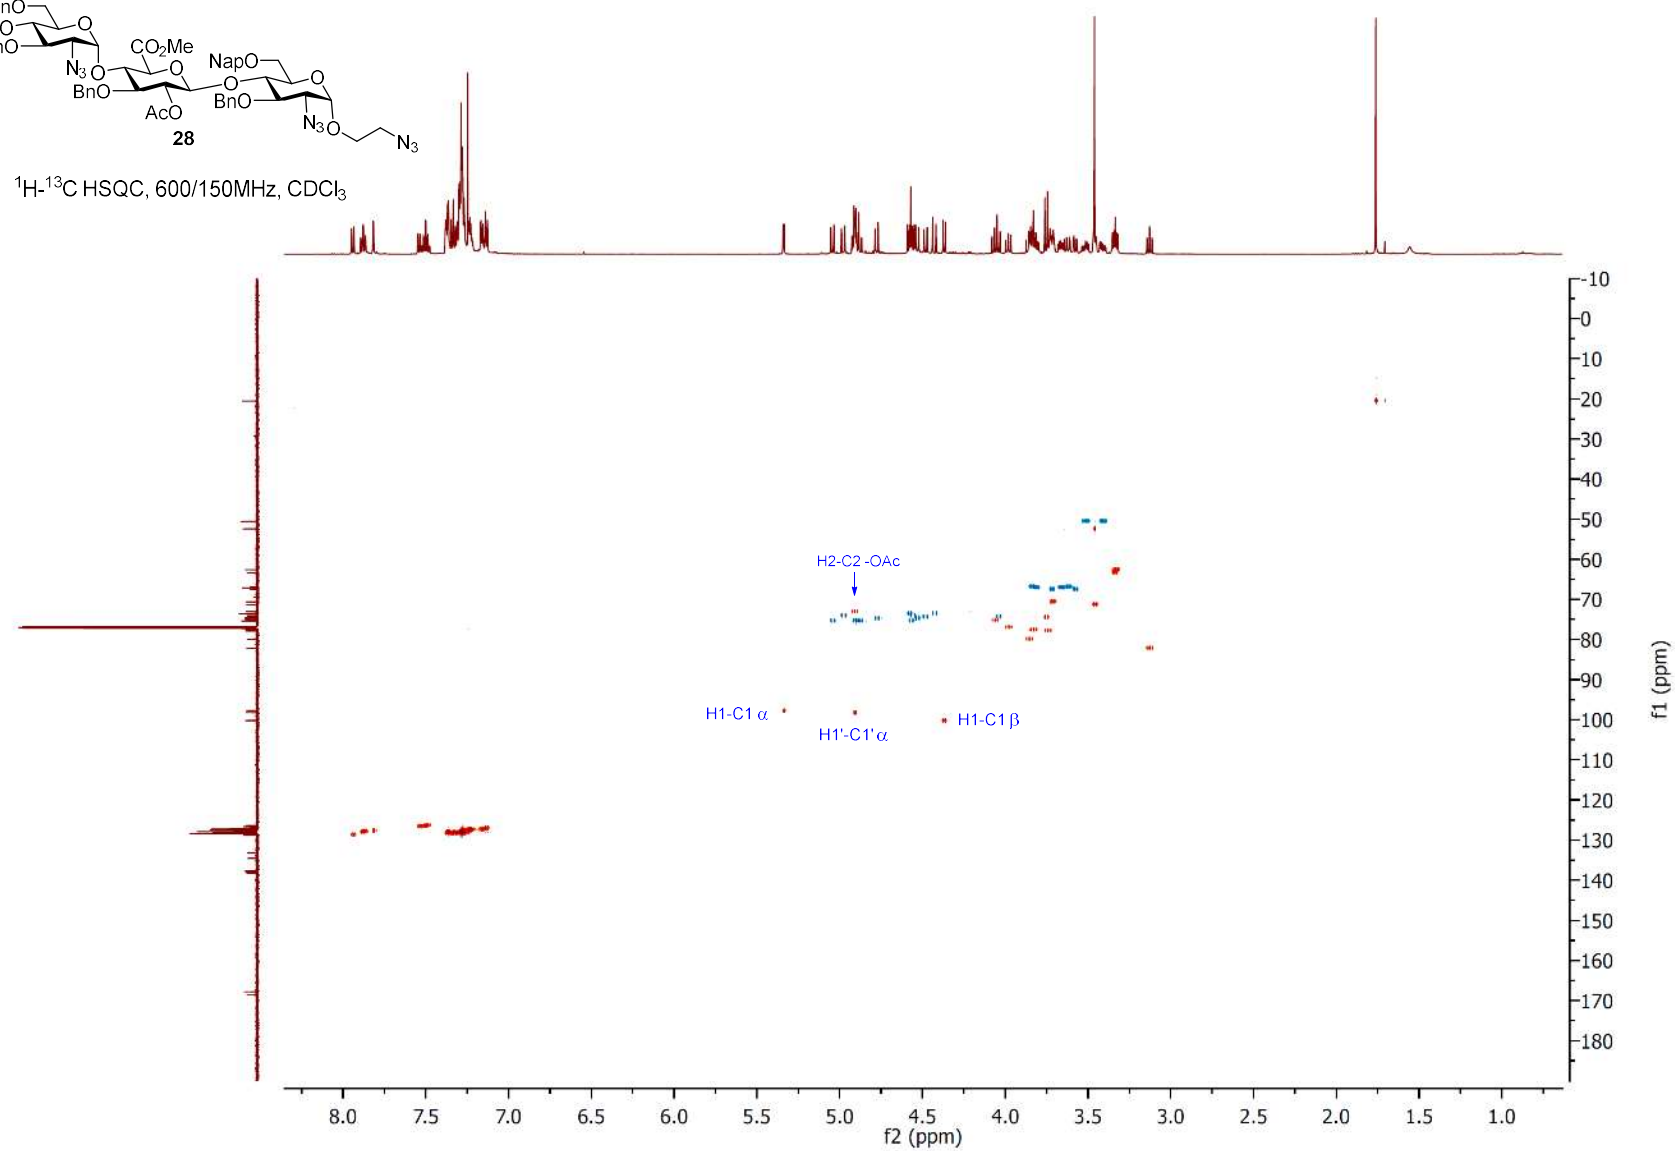



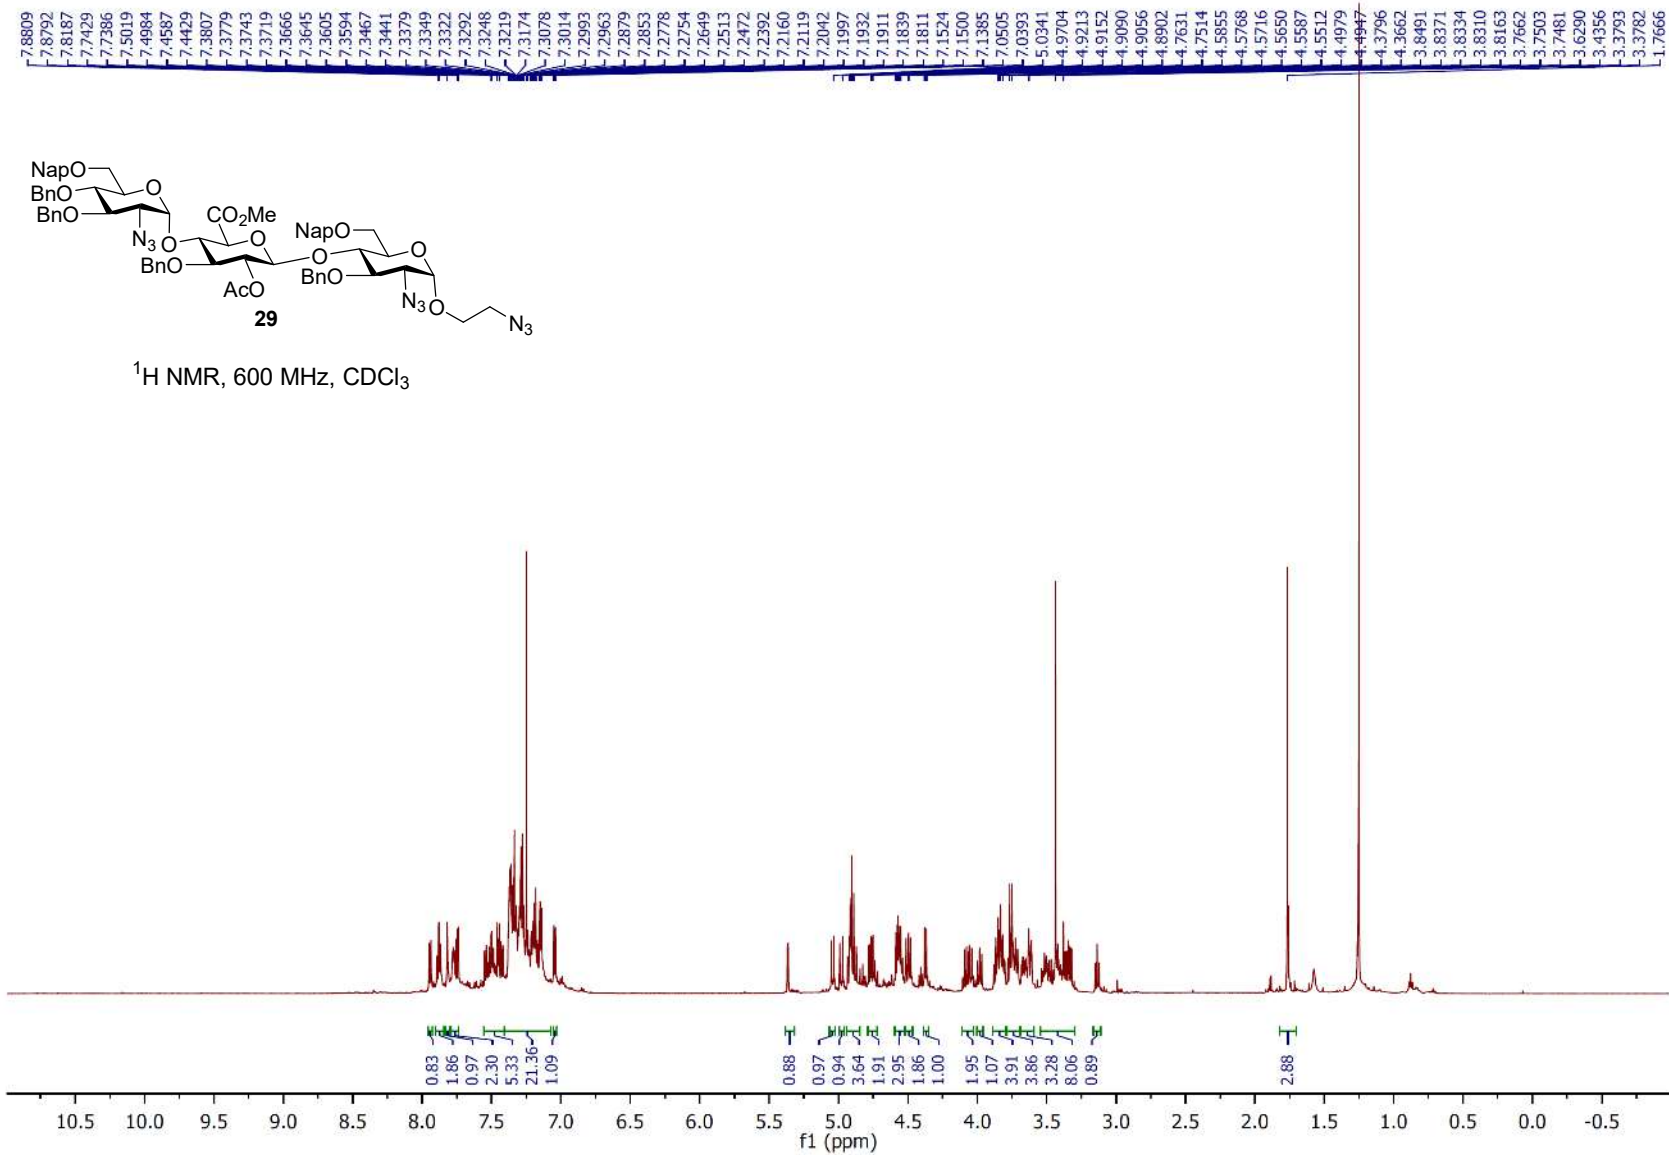

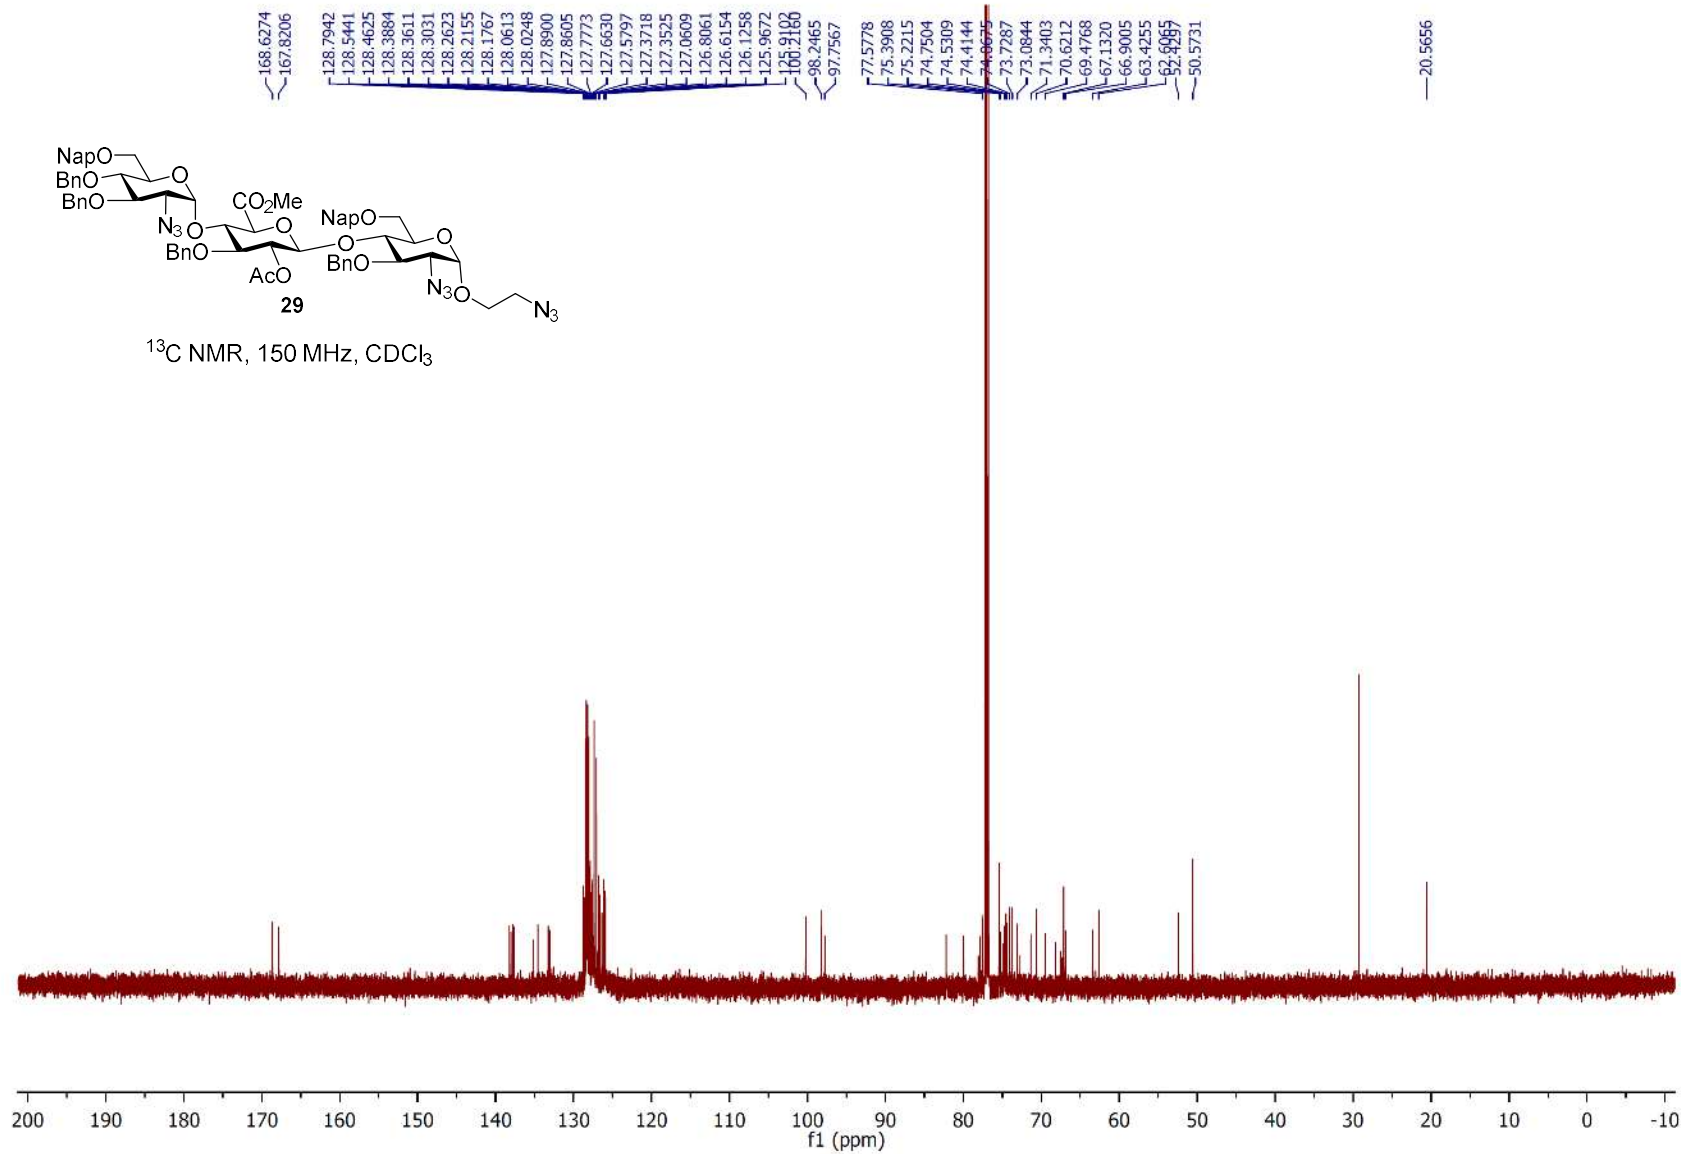

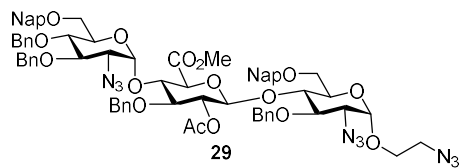

$^1\text{H}$ - $^{13}\text{C}$  HSQC, 600/150MHz,  $\text{CDCl}_3$

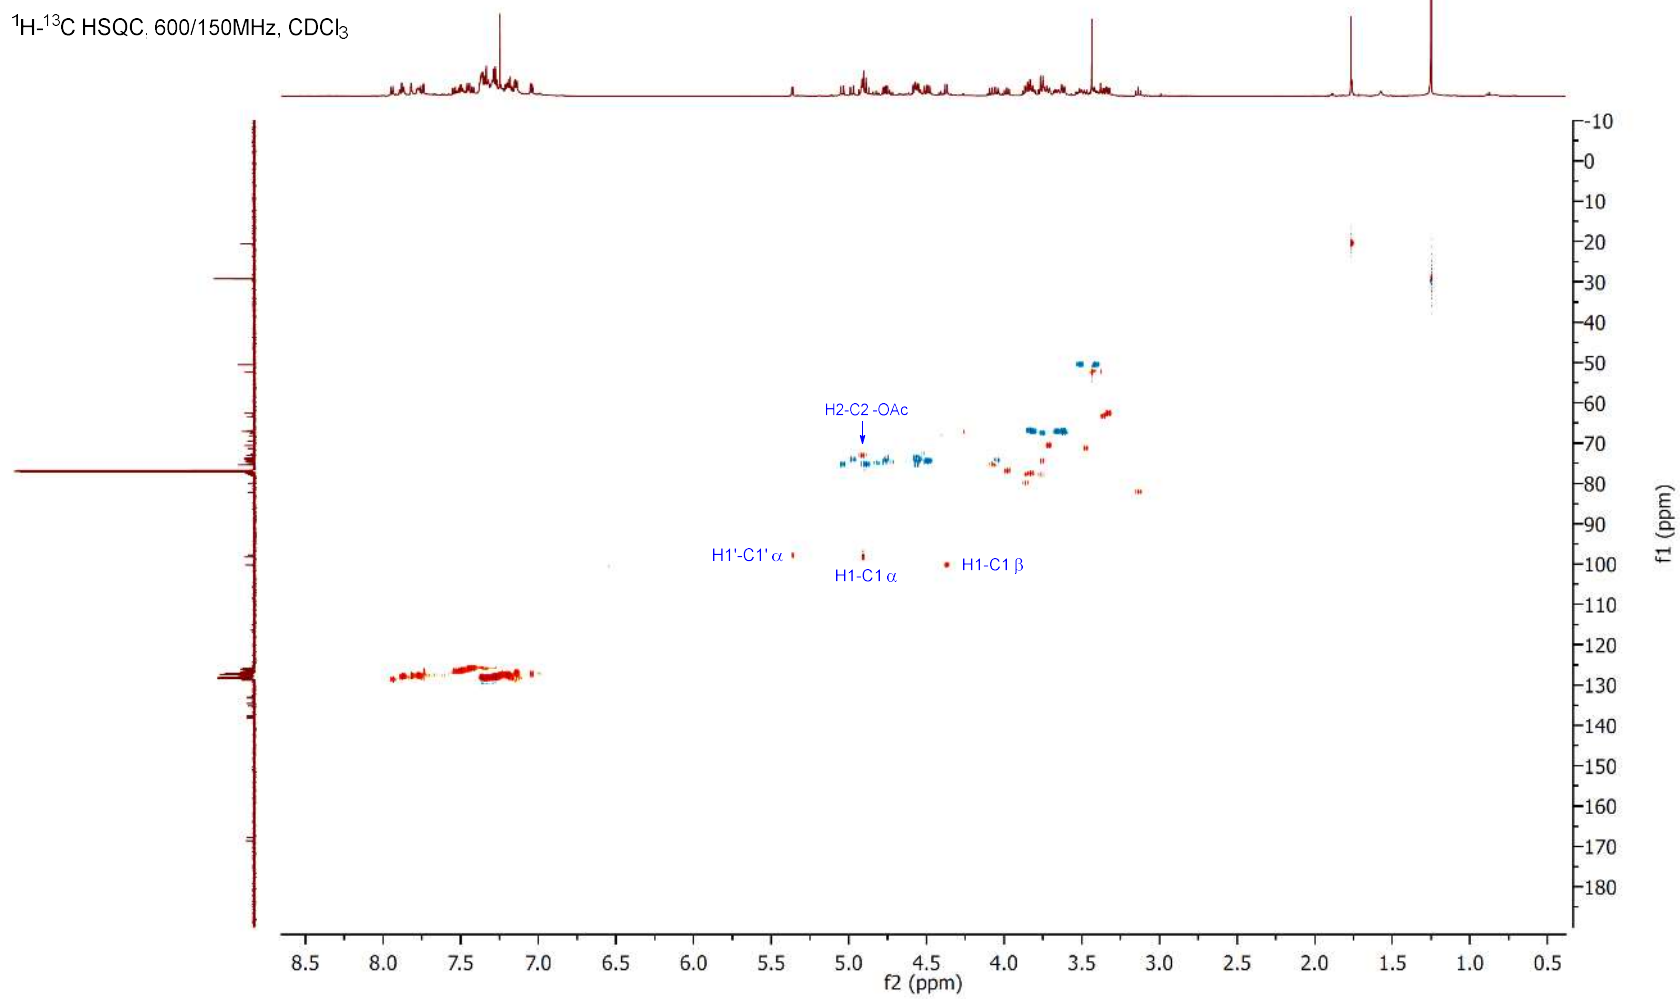

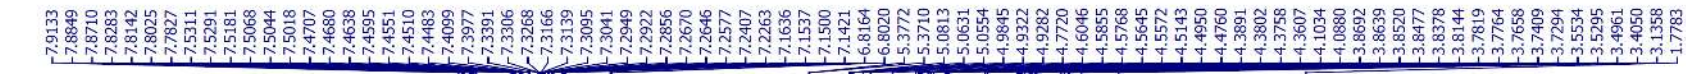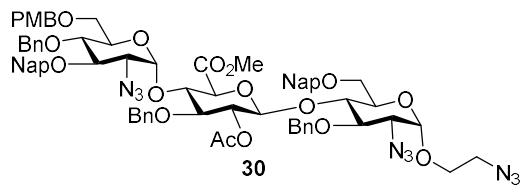

$^1\text{H NMR}$ , 600 MHz,  $\text{CDCl}_3$

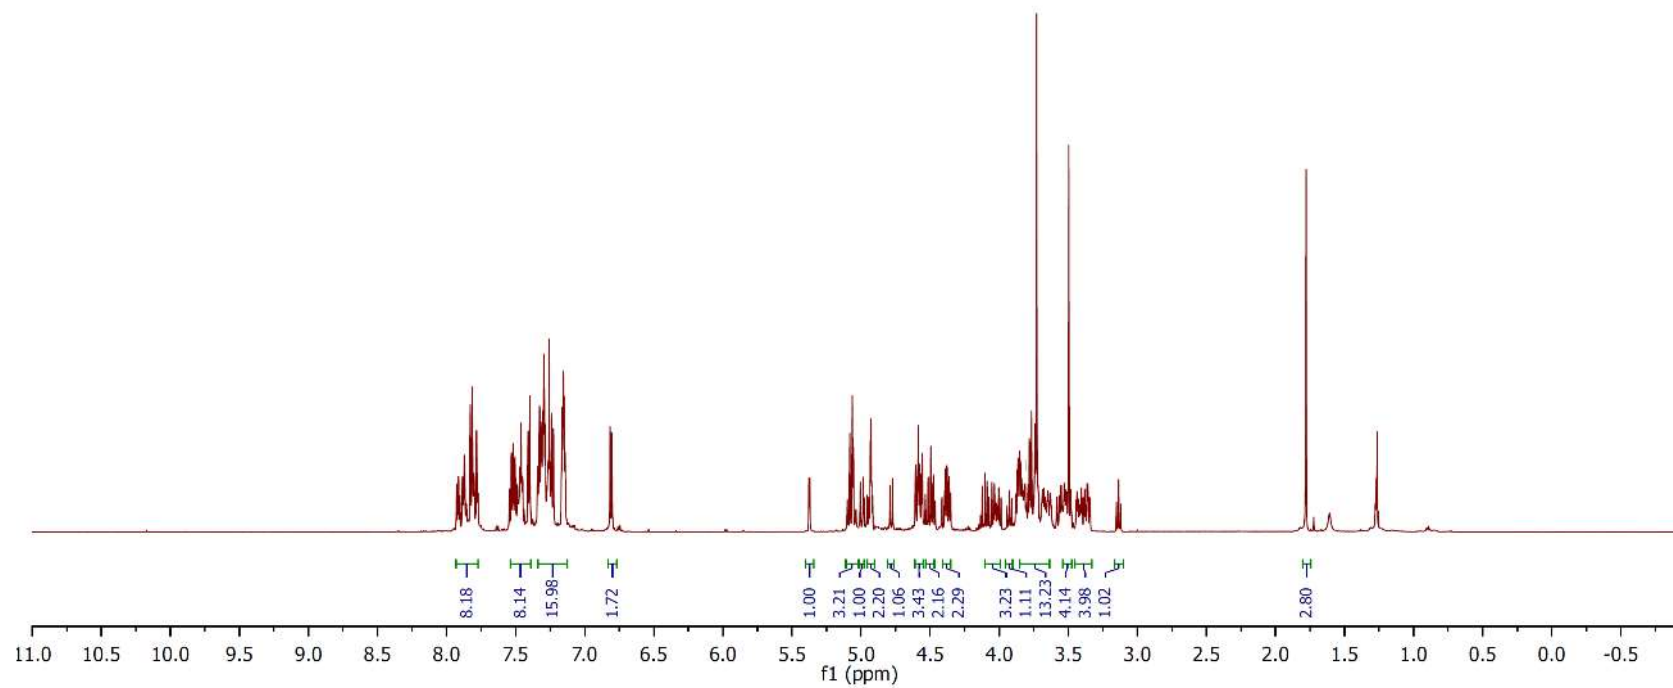

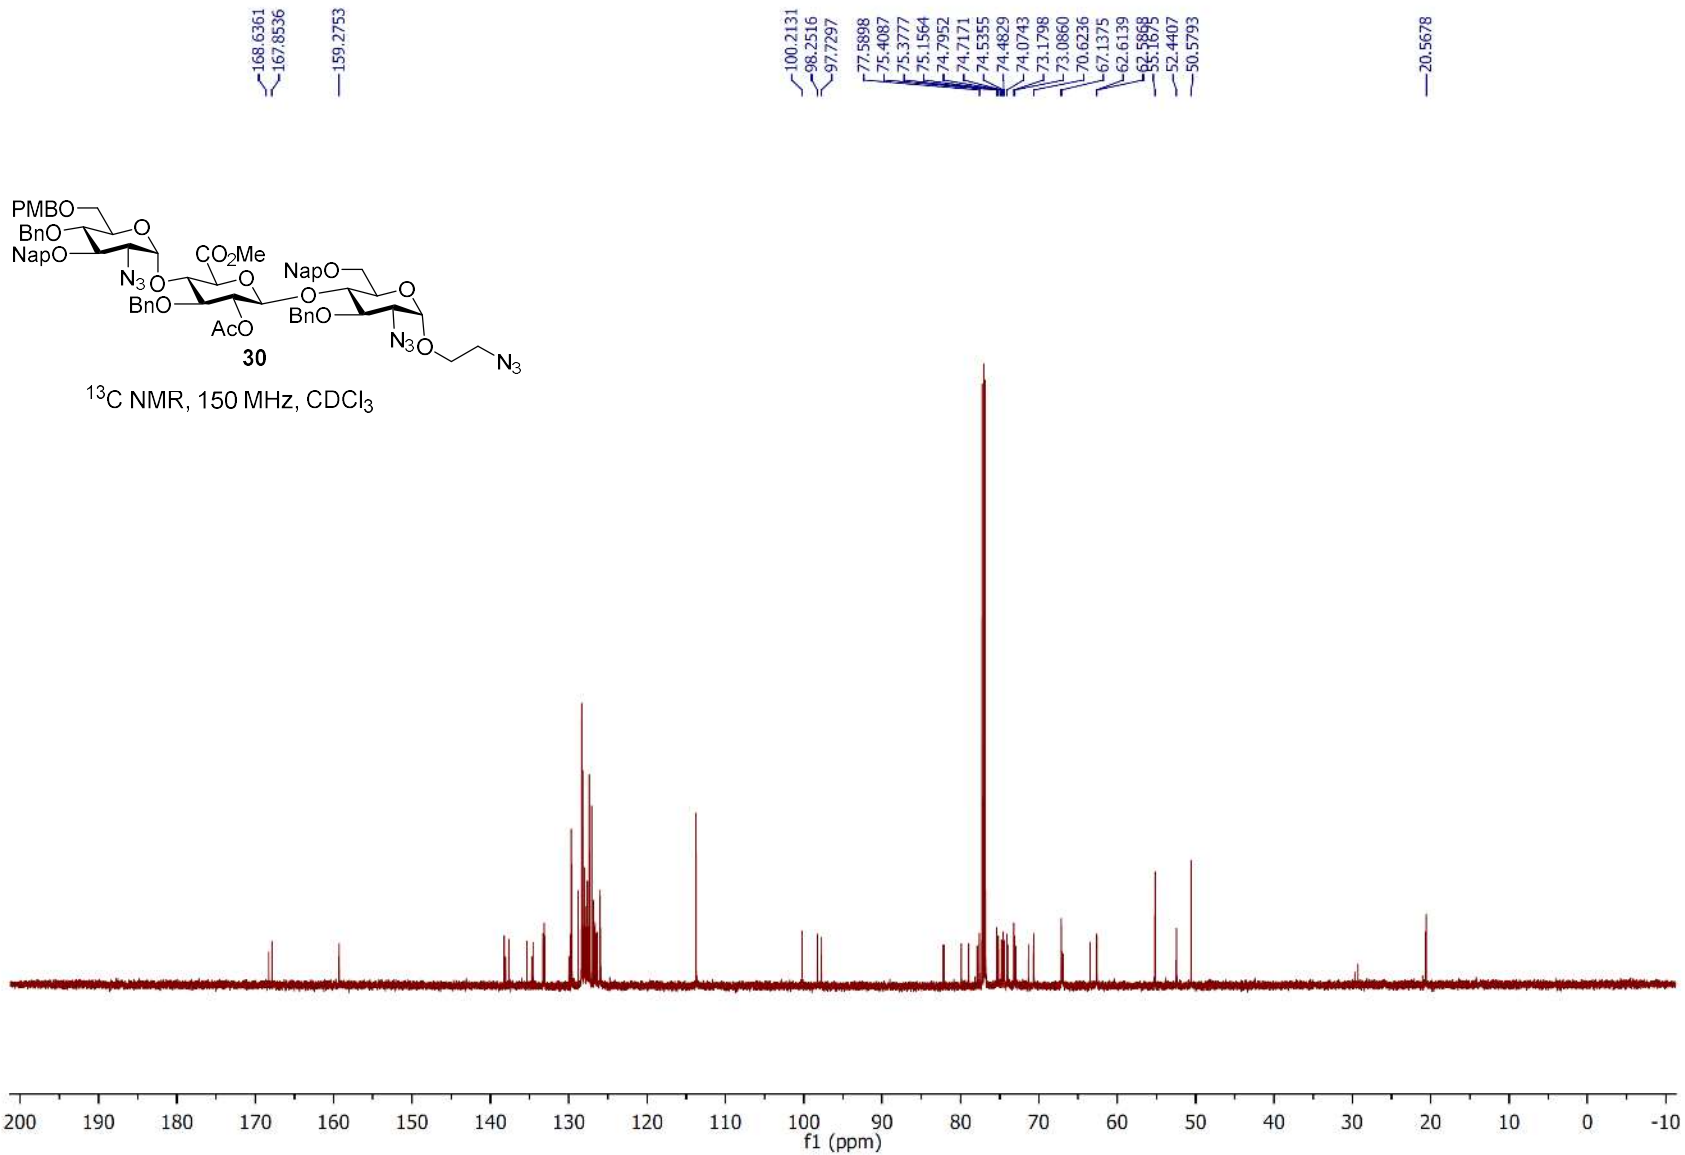

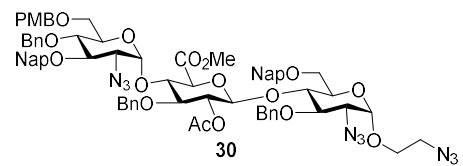

$^1\text{H}$ - $^{13}\text{C}$  HSQC, 600/150MHz,  $\text{CDCl}_3$

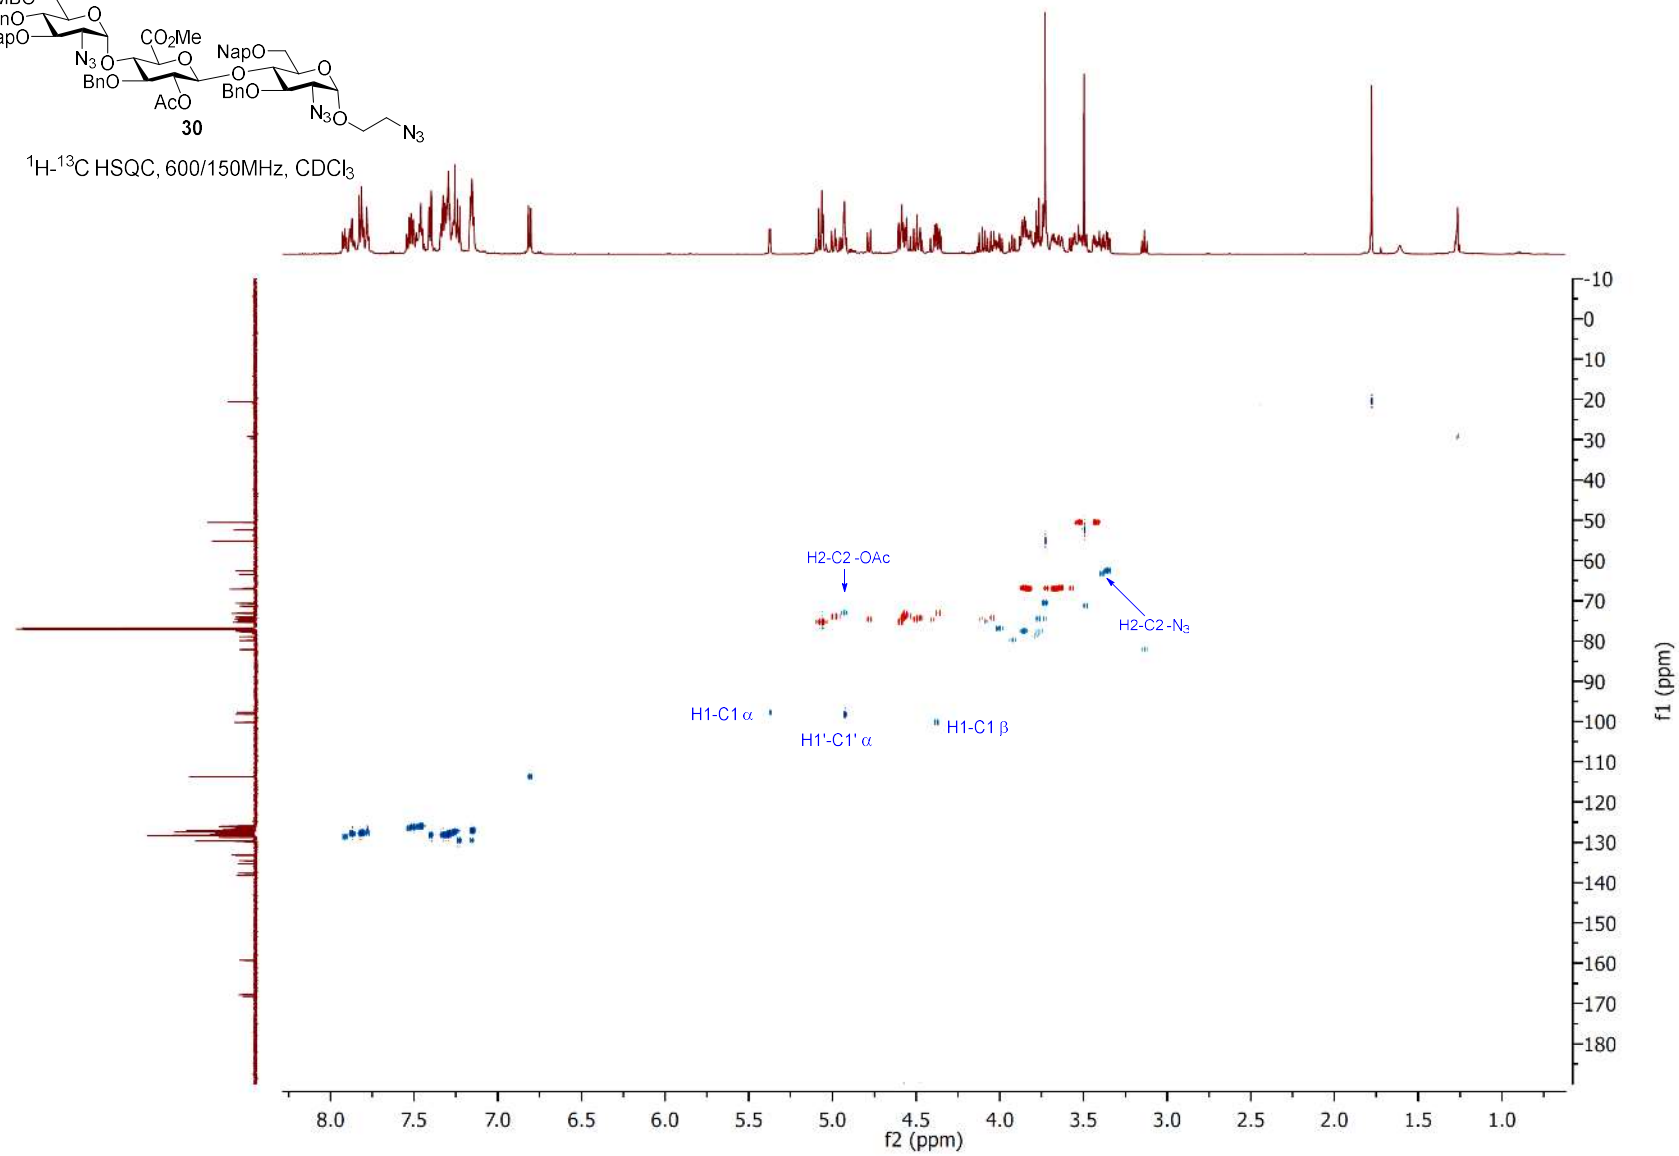

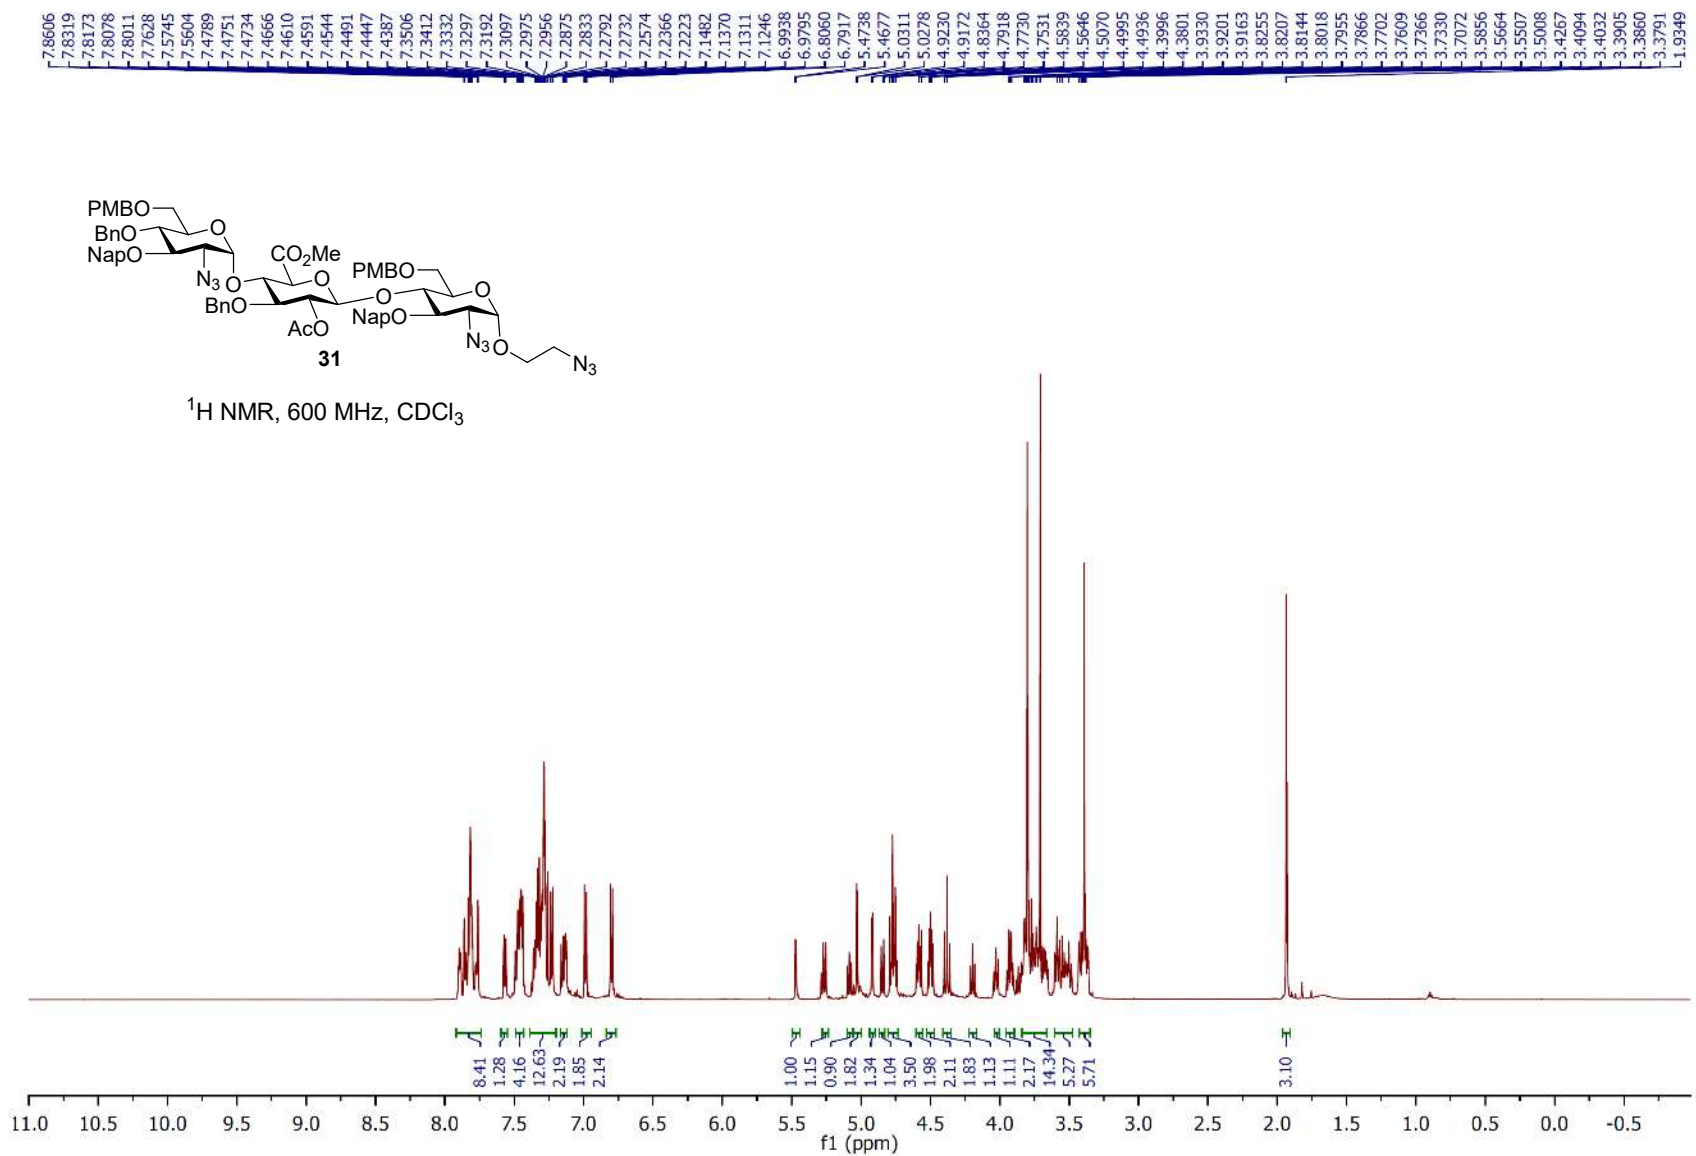

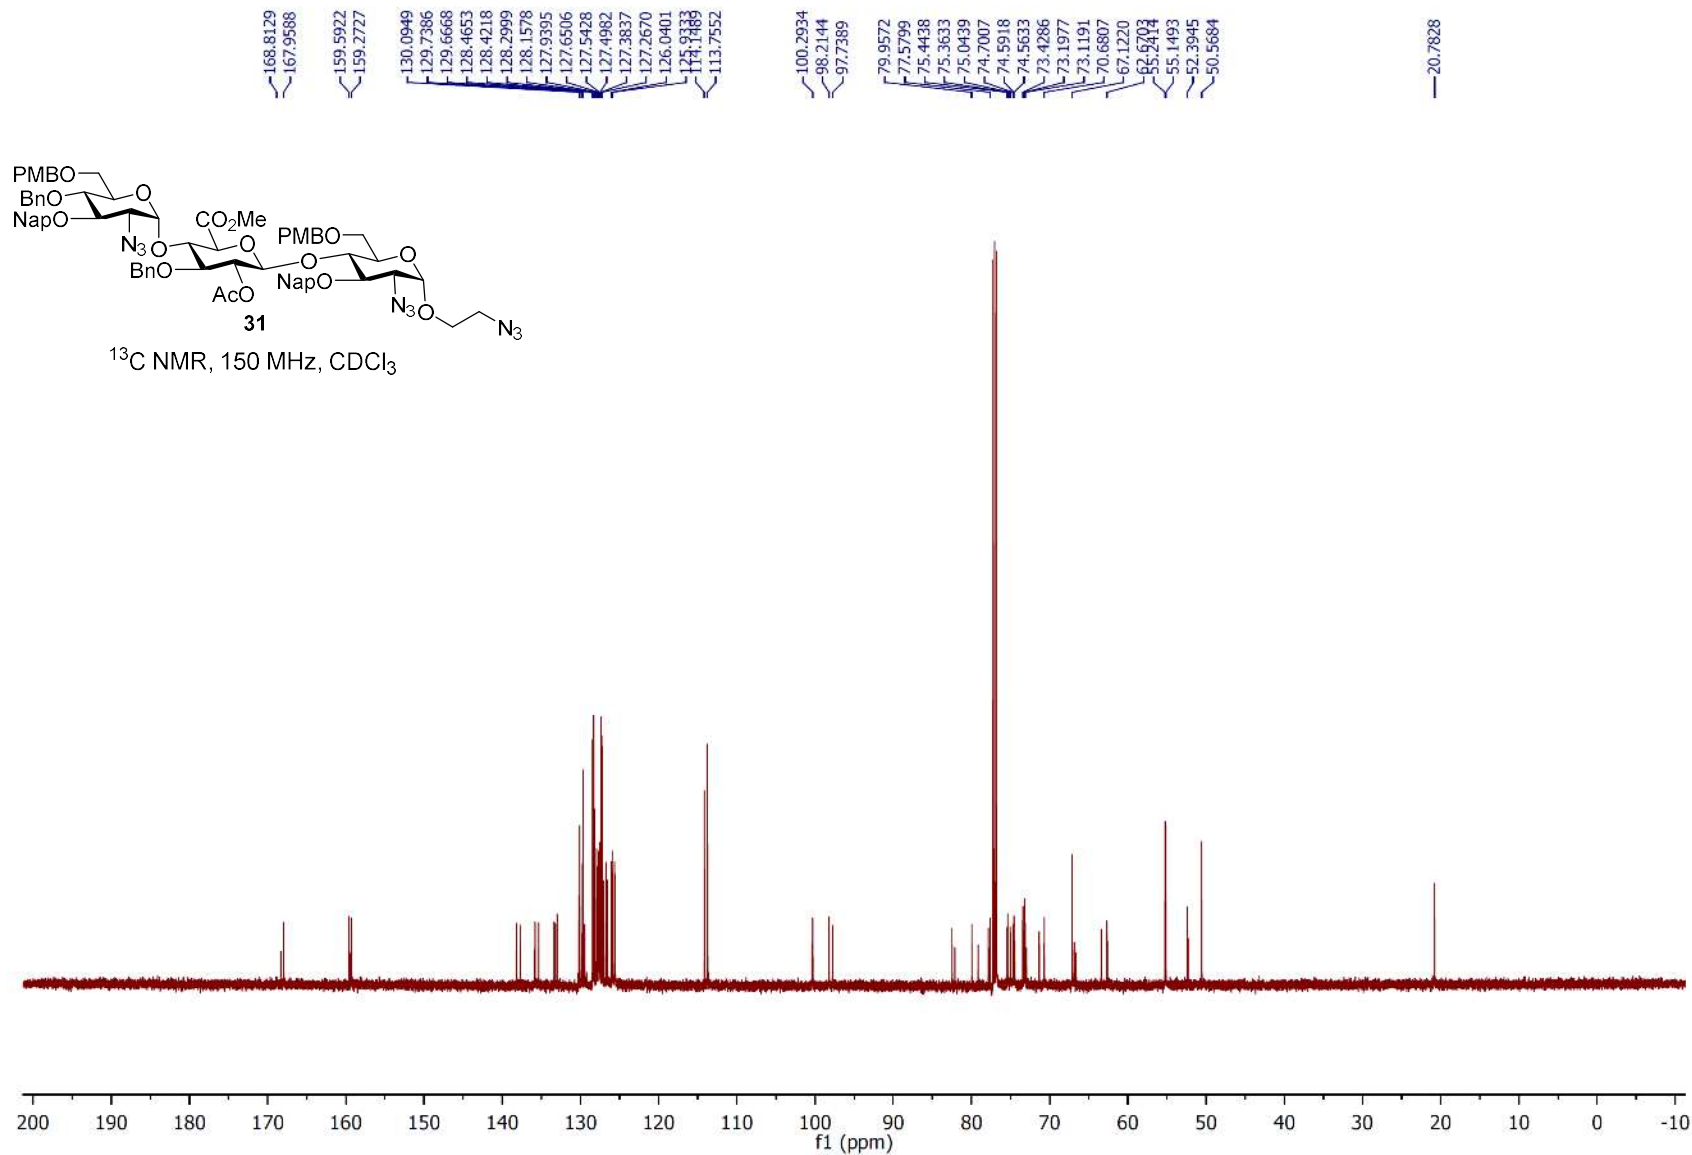



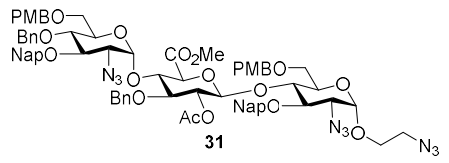

$^1\text{H}$ - $^{13}\text{C}$  HSQC, 600/150MHz,  $\text{CDCl}_3$

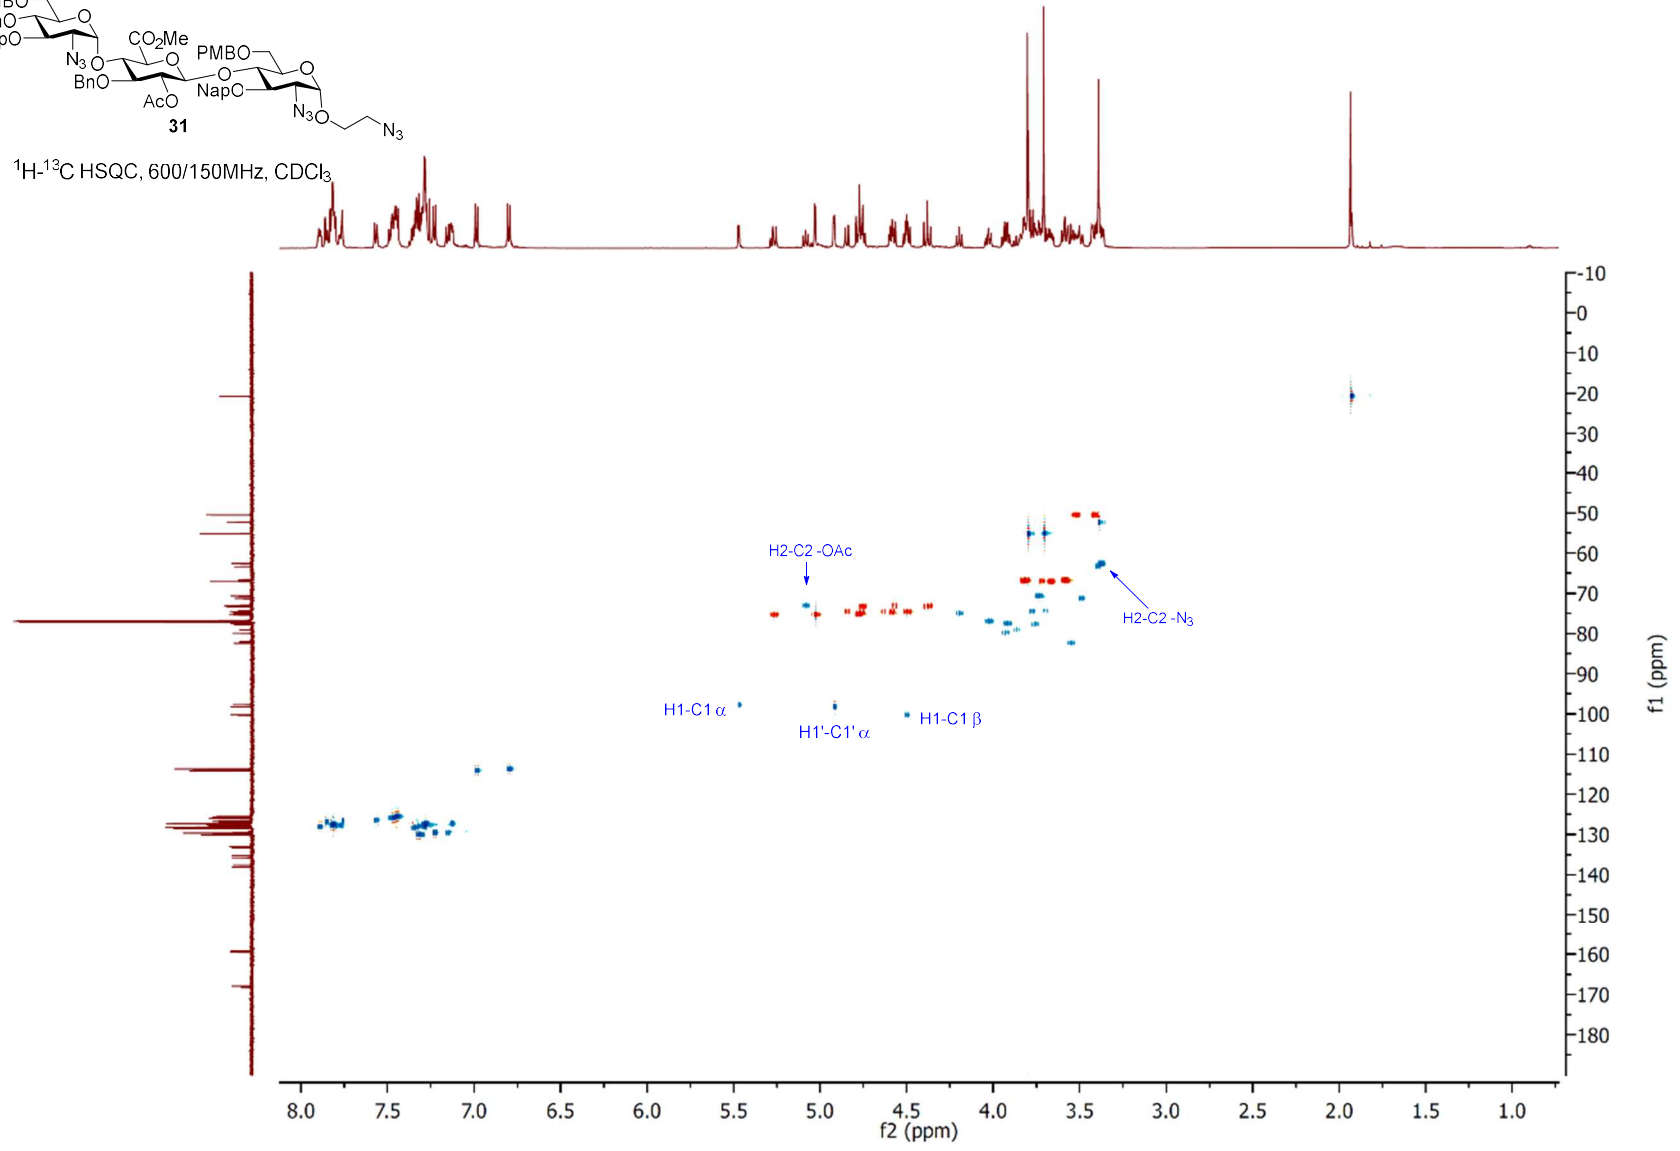

7.8364  
7.7969  
7.7826  
7.7727  
7.7670  
7.7588  
7.7443  
7.4598  
7.4525  
7.4515  
7.4477  
7.4441  
7.4373  
7.4347  
7.4212  
7.4187  
7.4122  
7.4058  
7.4032  
7.3632  
7.3544  
7.3519  
7.3499  
7.3435  
7.3362  
7.3318  
7.3218  
7.3019  
7.2964  
7.2904  
7.2855  
7.2784  
7.2579  
7.2172  
7.1902  
7.1803  
7.1779  
7.0362  
7.0246  
6.9990  
6.9847  
6.9847  
5.4744  
5.4682  
5.2336  
4.9157  
4.9096  
4.8819  
4.8710  
4.8617  
4.8436  
4.7903  
4.7703  
4.7668  
4.7555  
4.7467  
4.6034  
4.5937  
4.5852  
4.5732  
4.5082  
4.4947  
4.4895  
4.3765  
3.9088  
3.8214  
3.8155  
3.8111  
3.8017  
3.7984  
3.7788  
3.7670  
3.7629  
3.7595  
3.7553  
3.7517  
3.5576  
3.5359  
3.3904  
3.3734  
3.3672  
3.3463  
1.9318

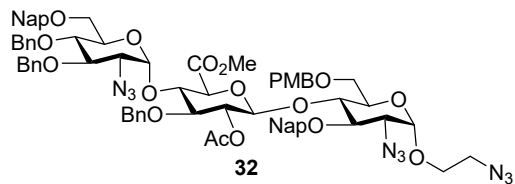

<sup>1</sup>H NMR, 600 MHz, CDCl<sub>3</sub>

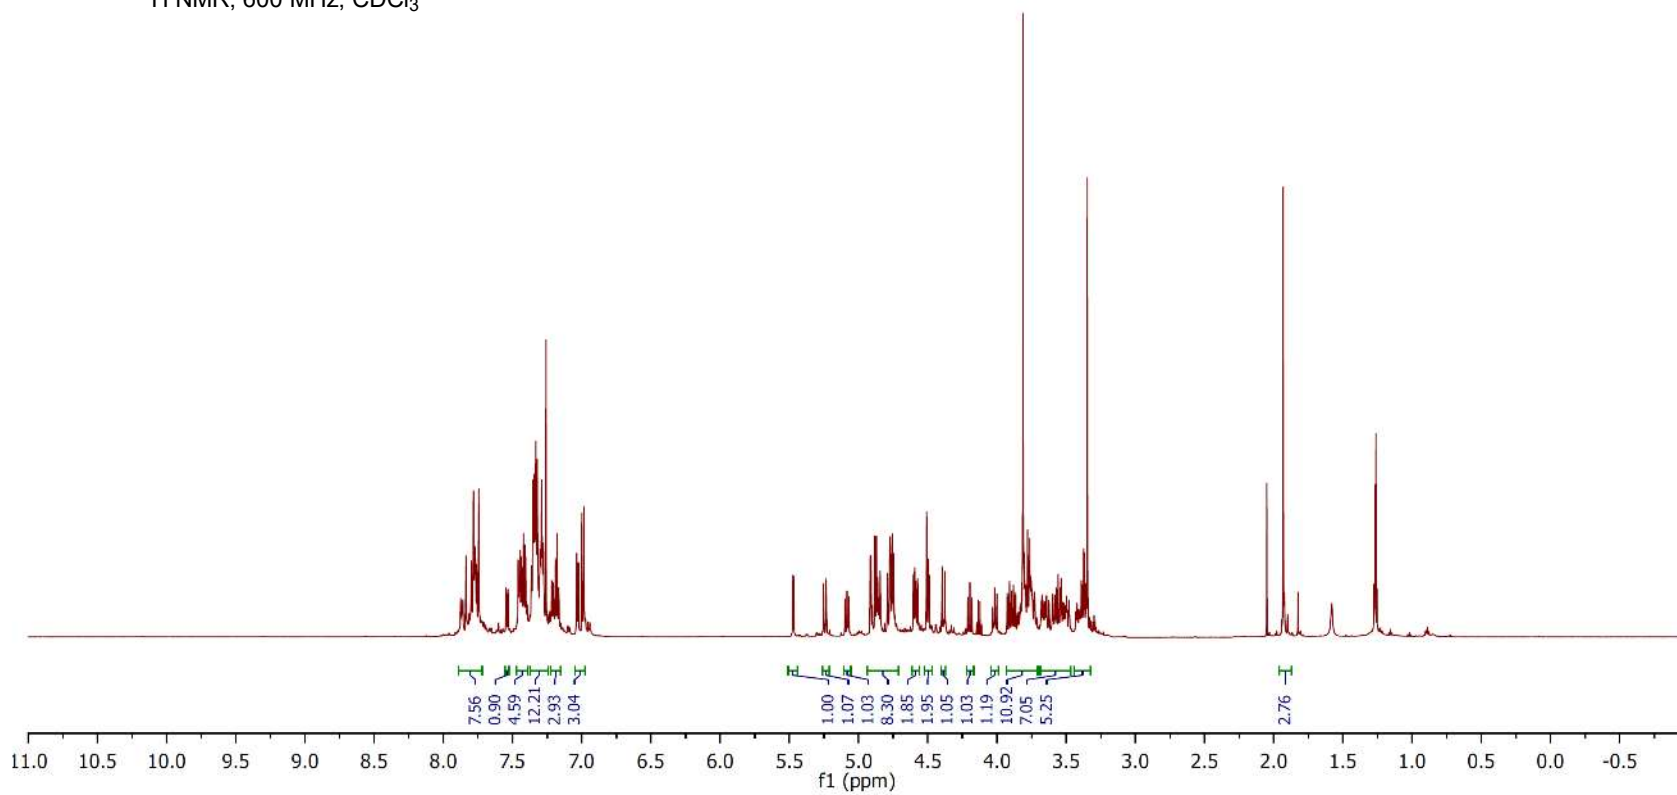

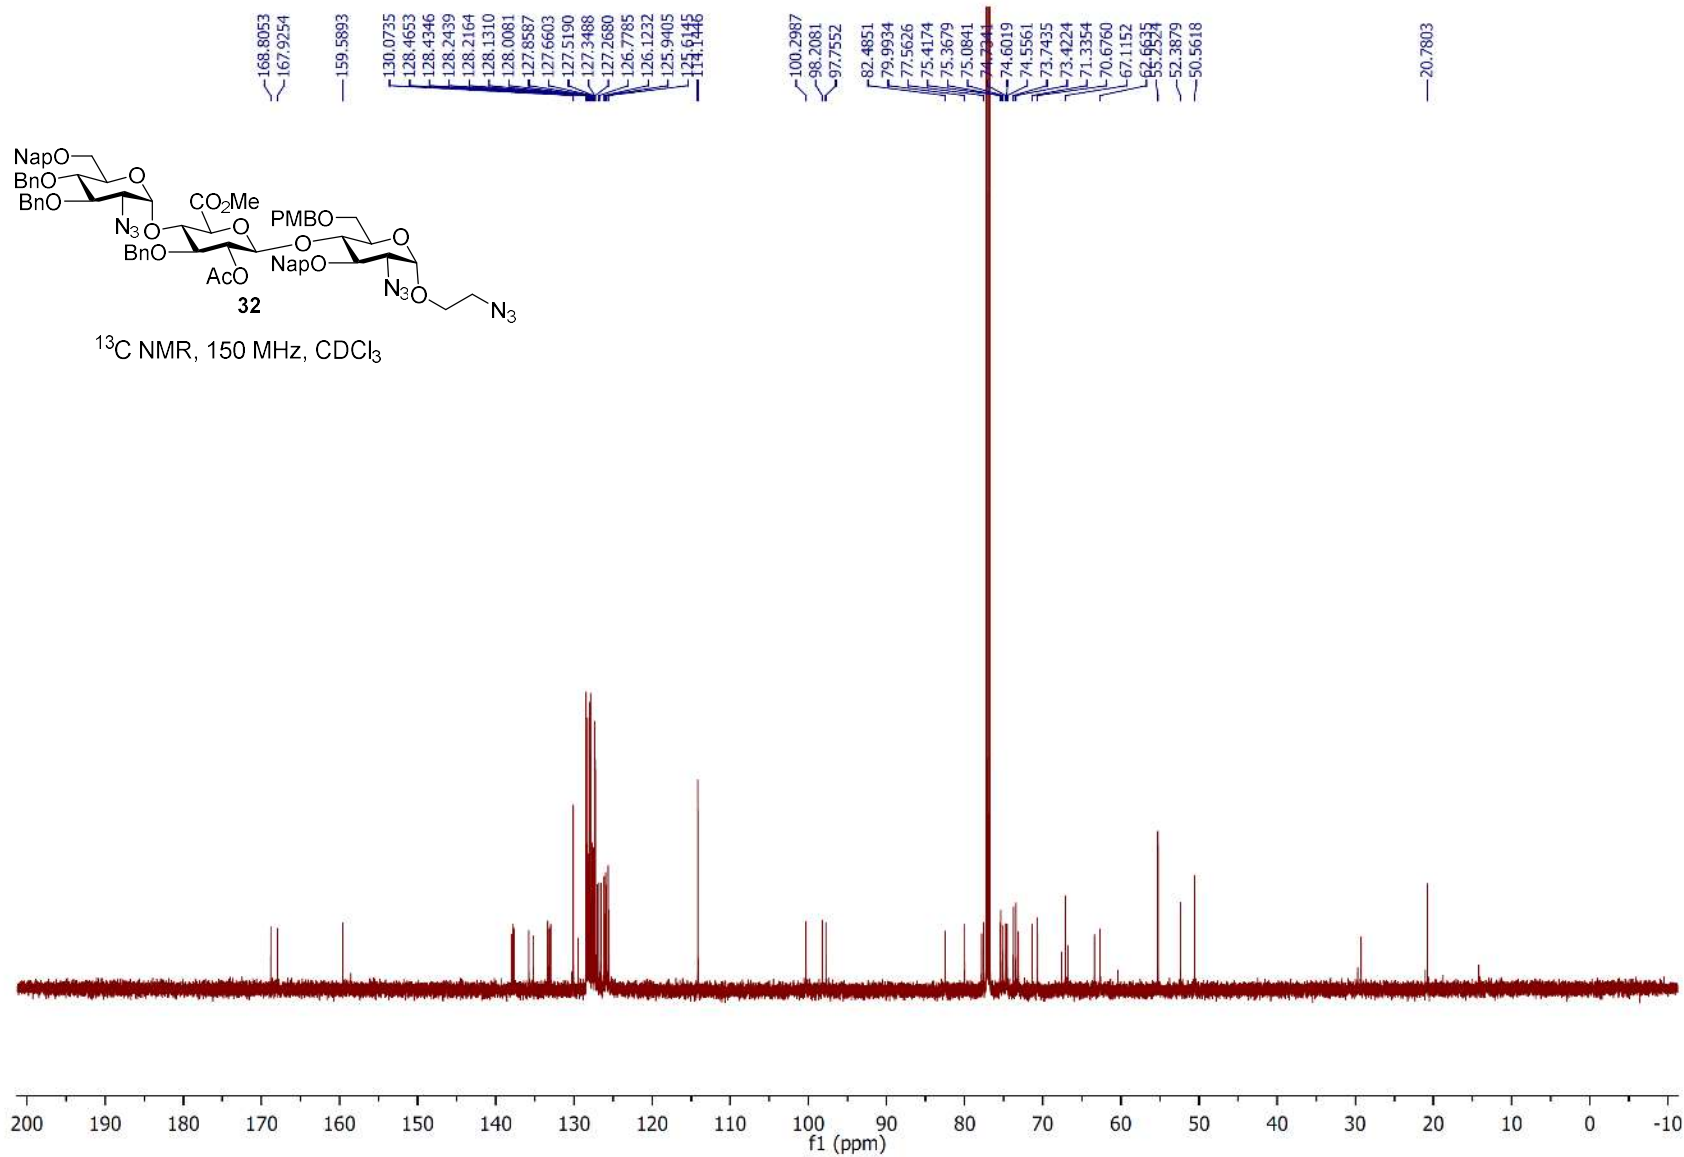

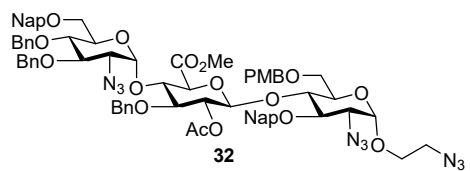

$^1\text{H}$ - $^{13}\text{C}$  HSQC, 600/150MHz,  $\text{CDCl}_3$

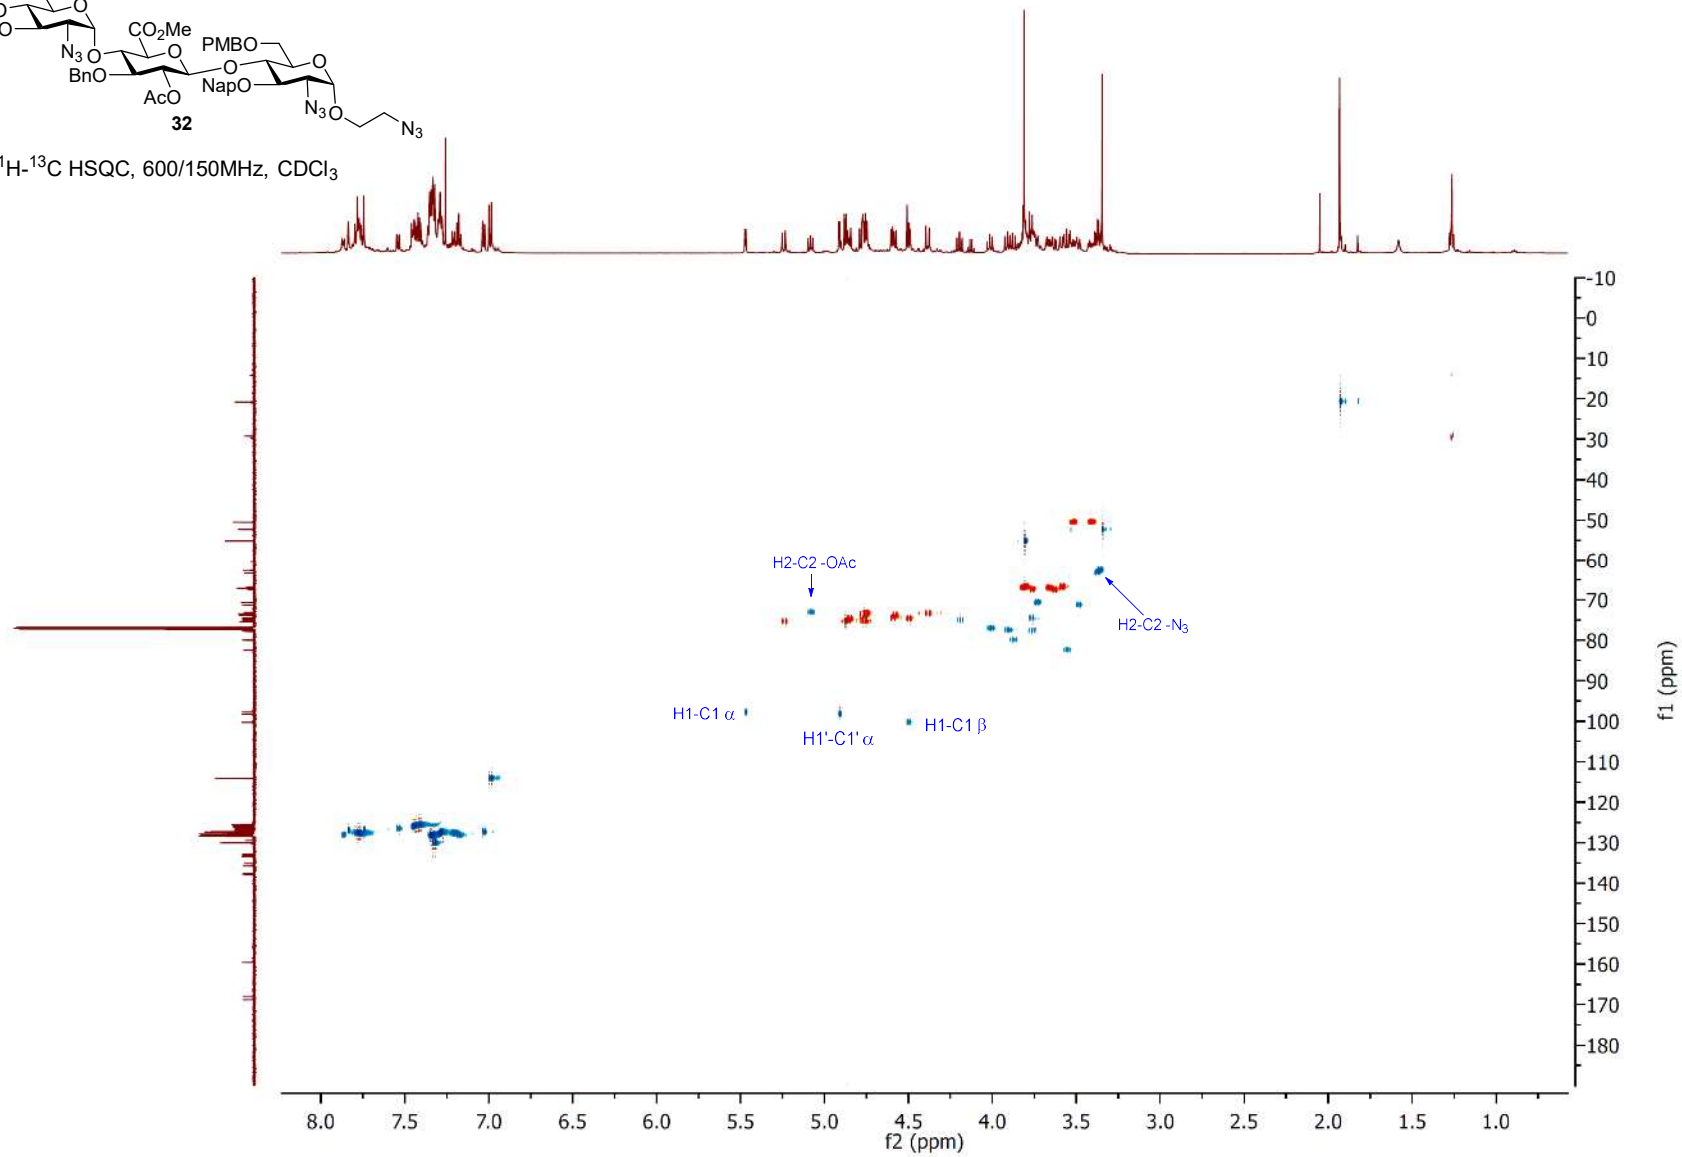

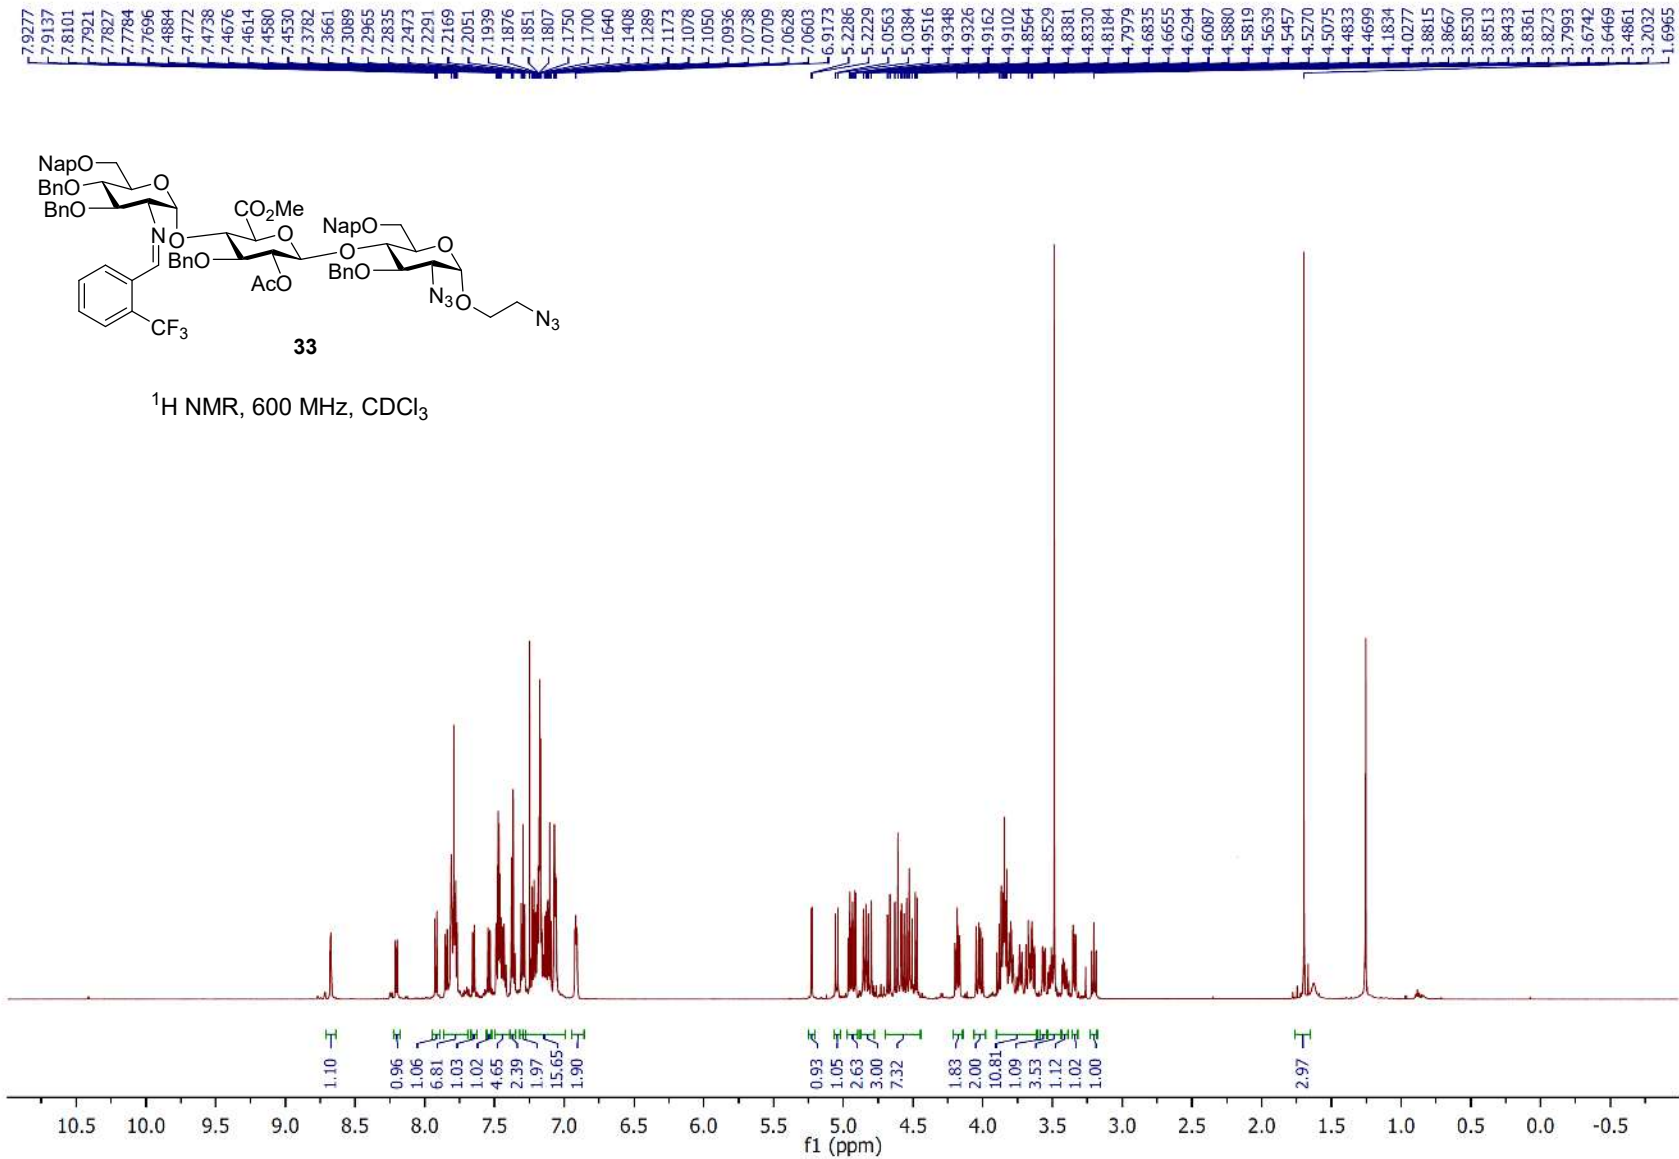

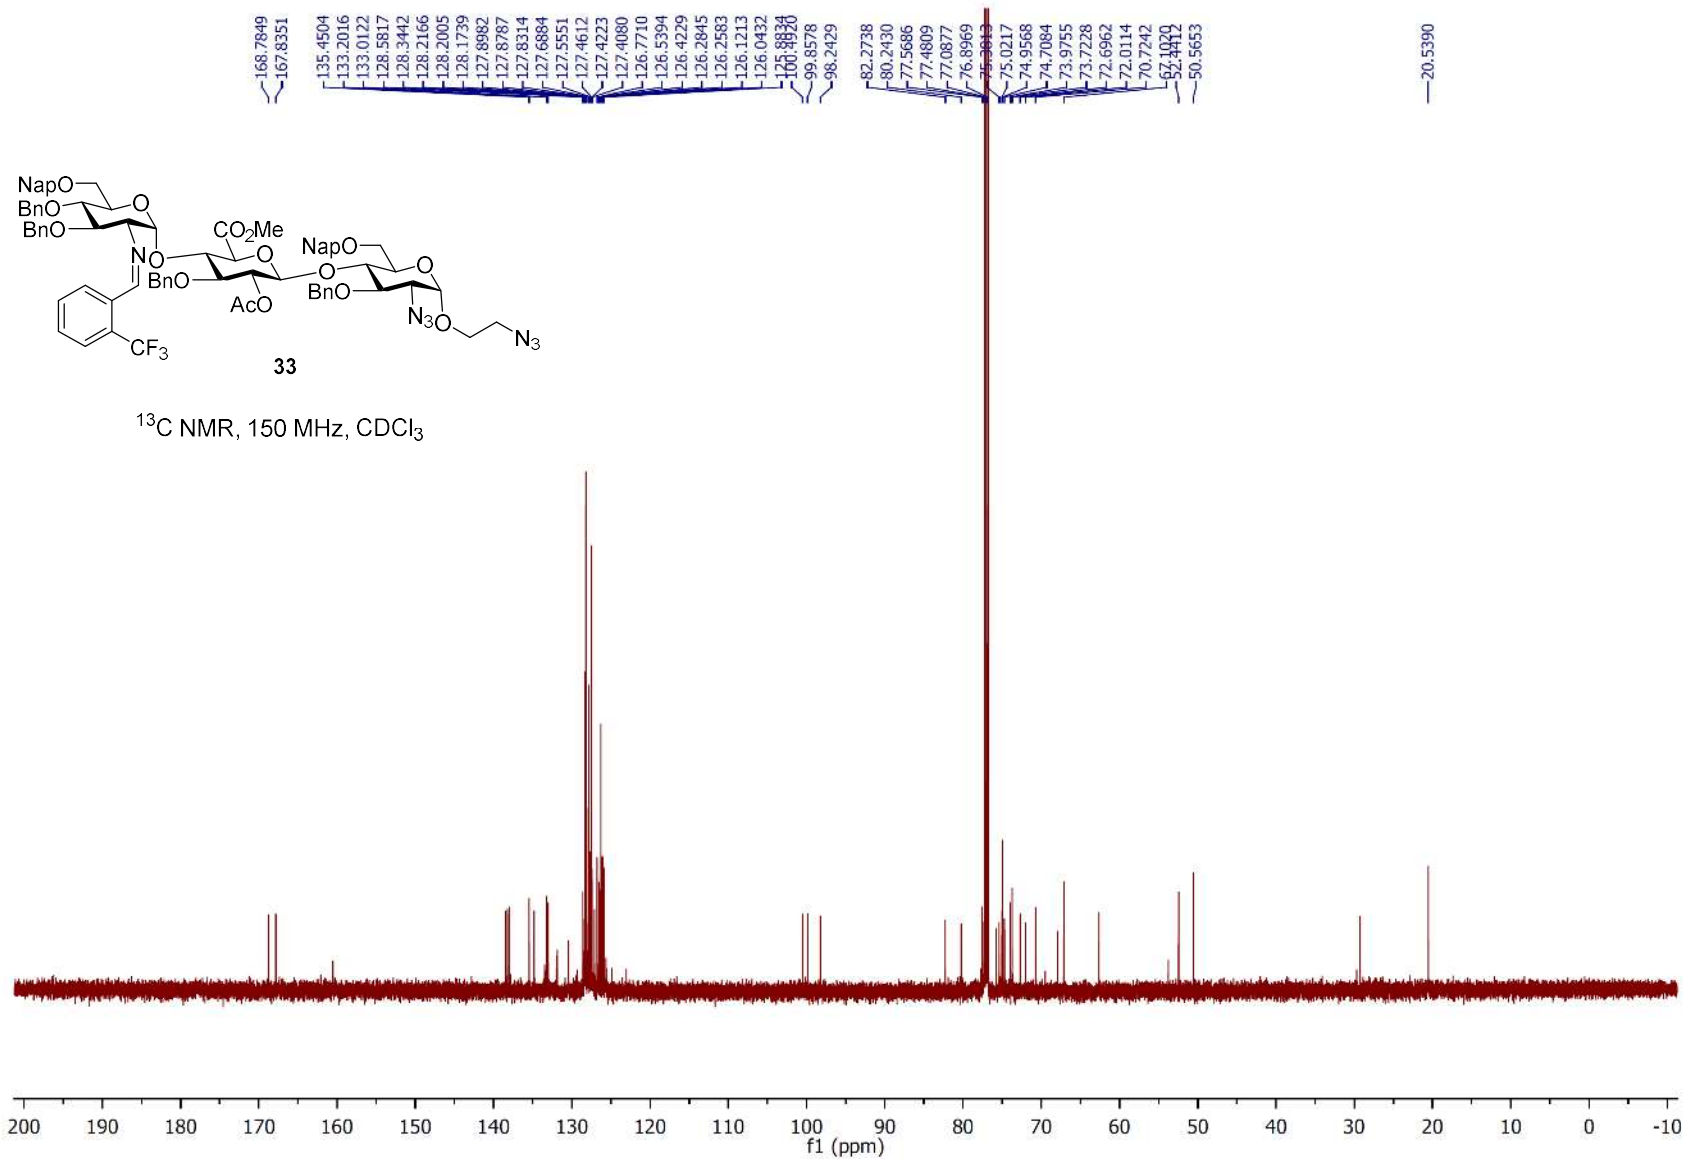

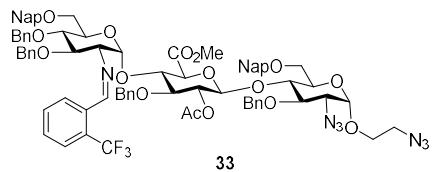

$^1\text{H}$ - $^{13}\text{C}$  HSQC, 600/150MHz,  $\text{CDCl}_3$

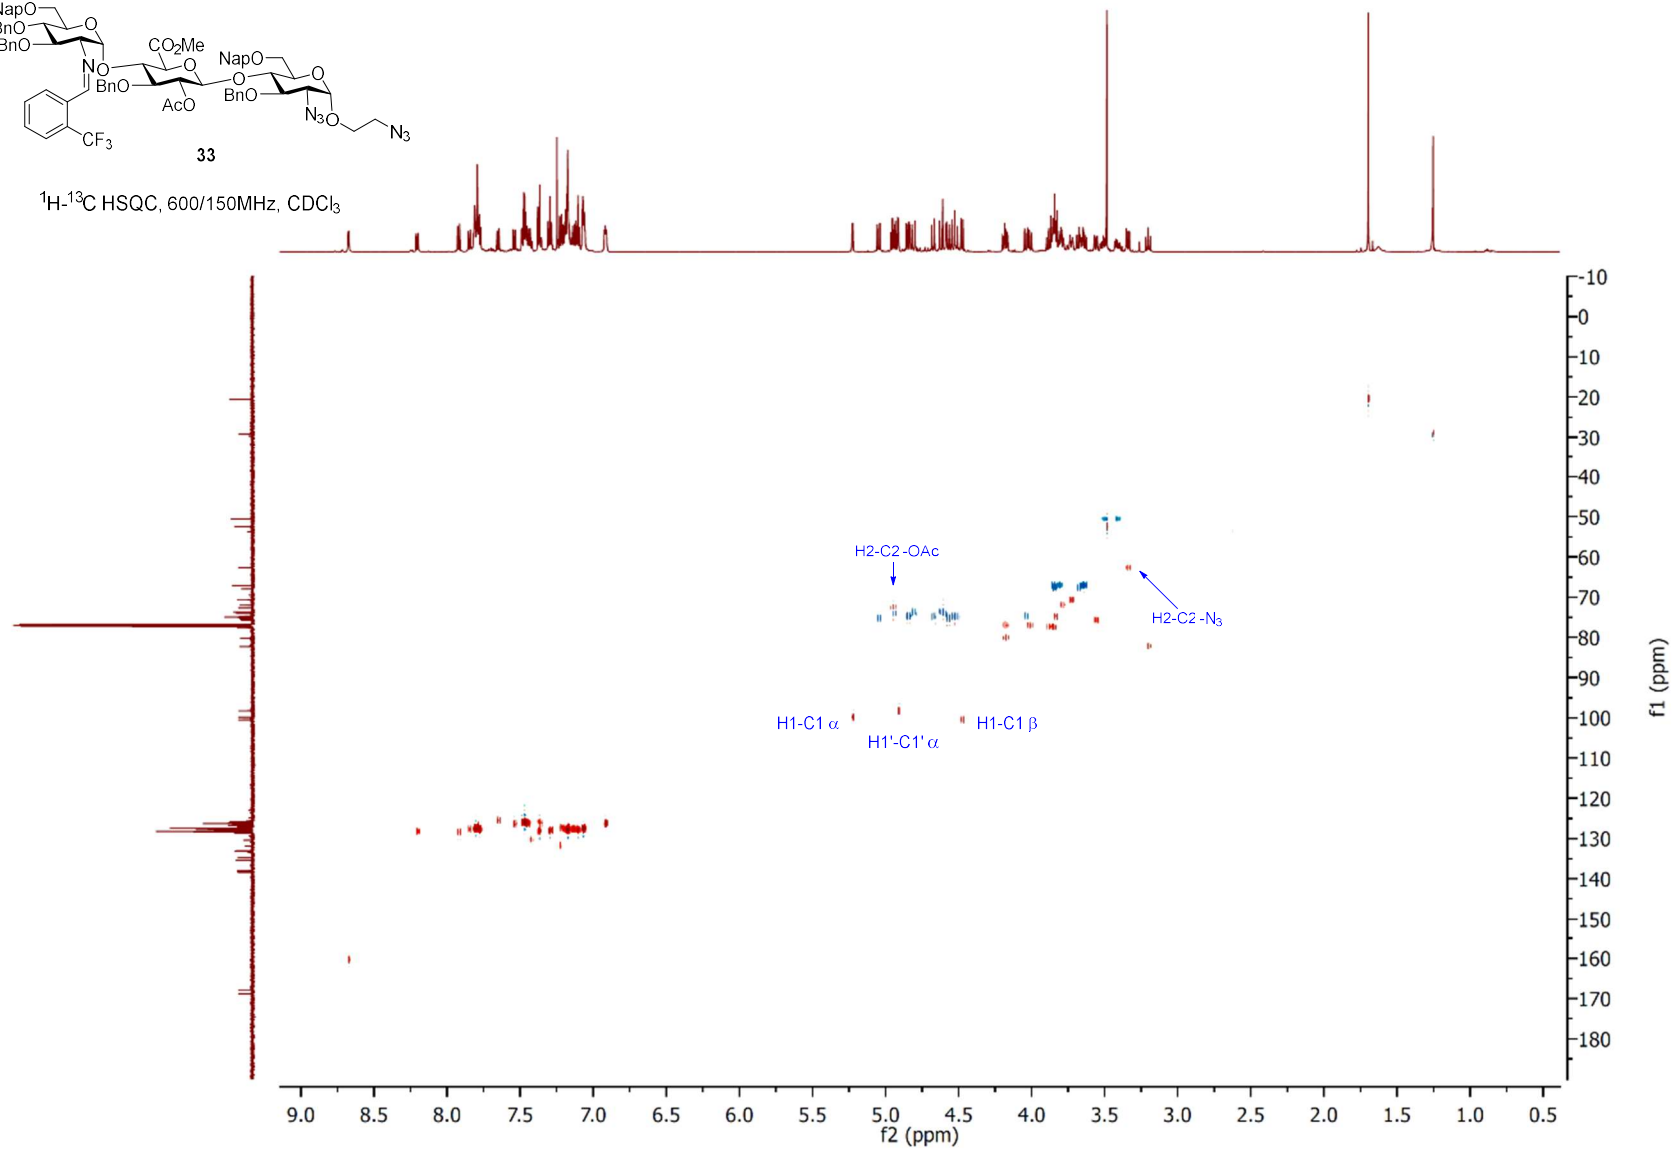

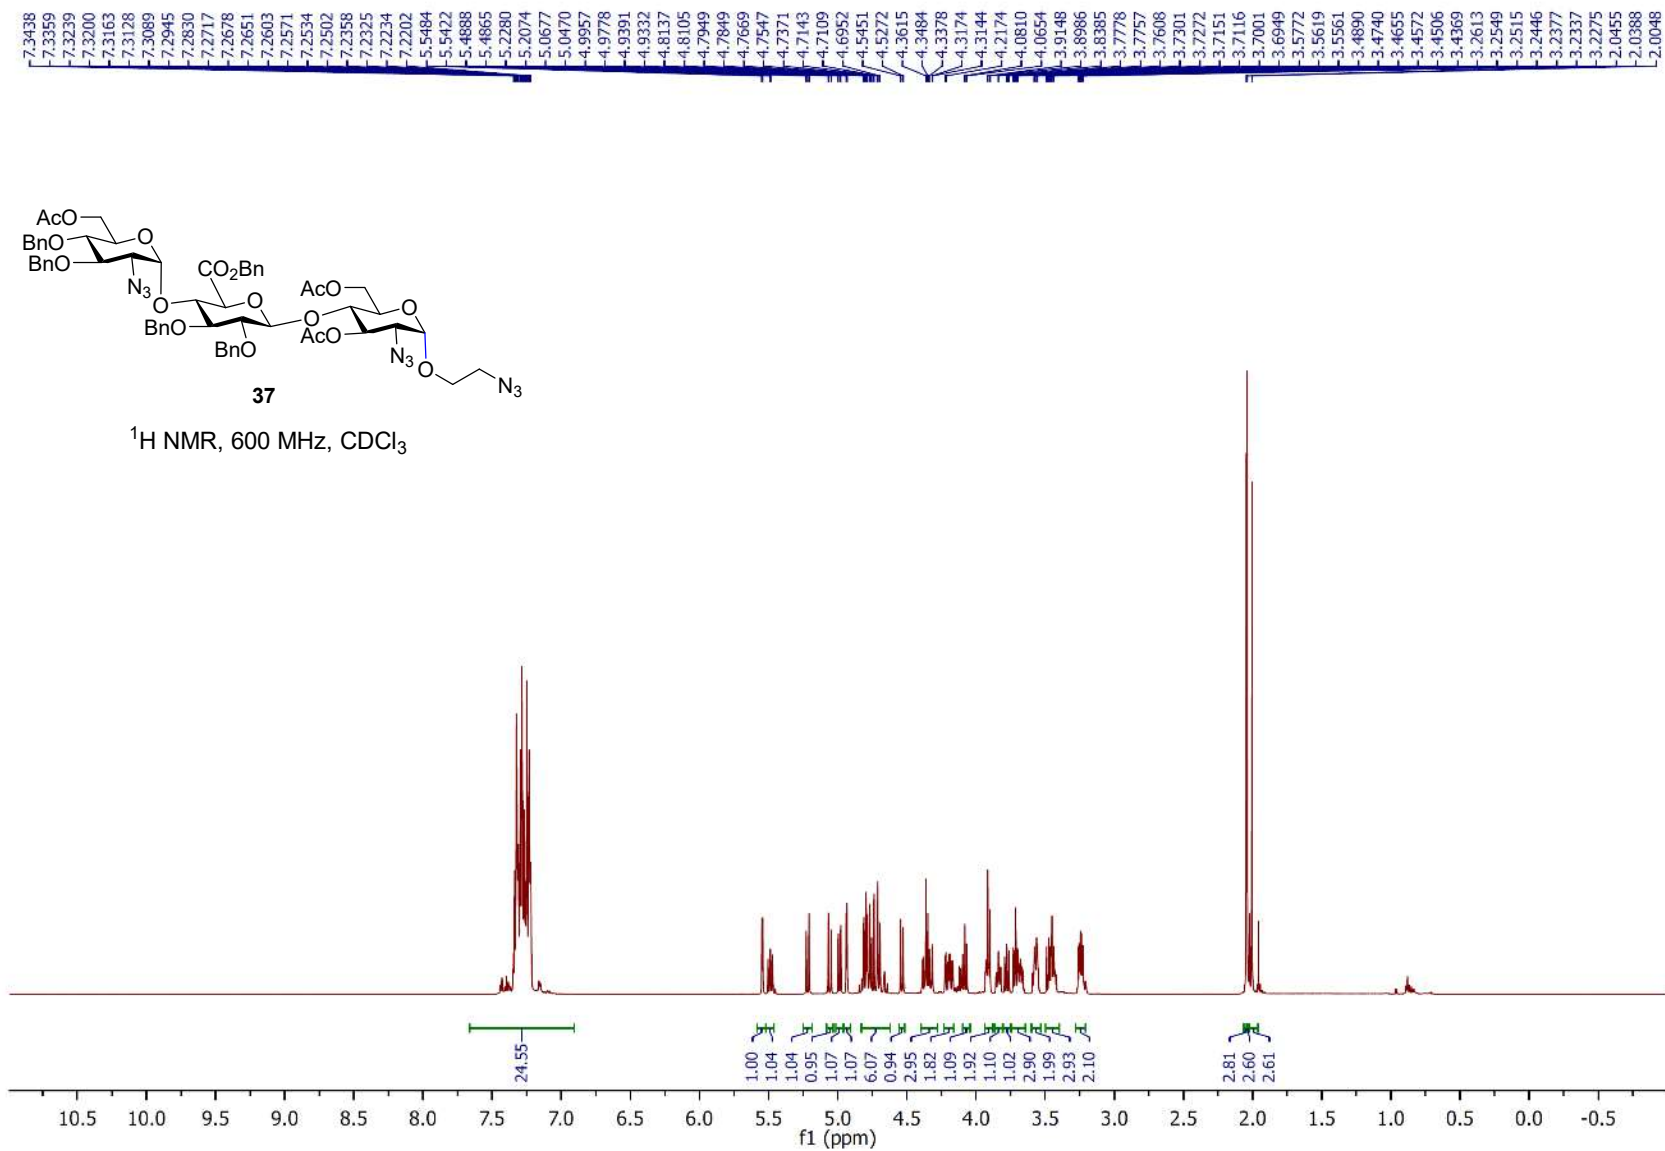



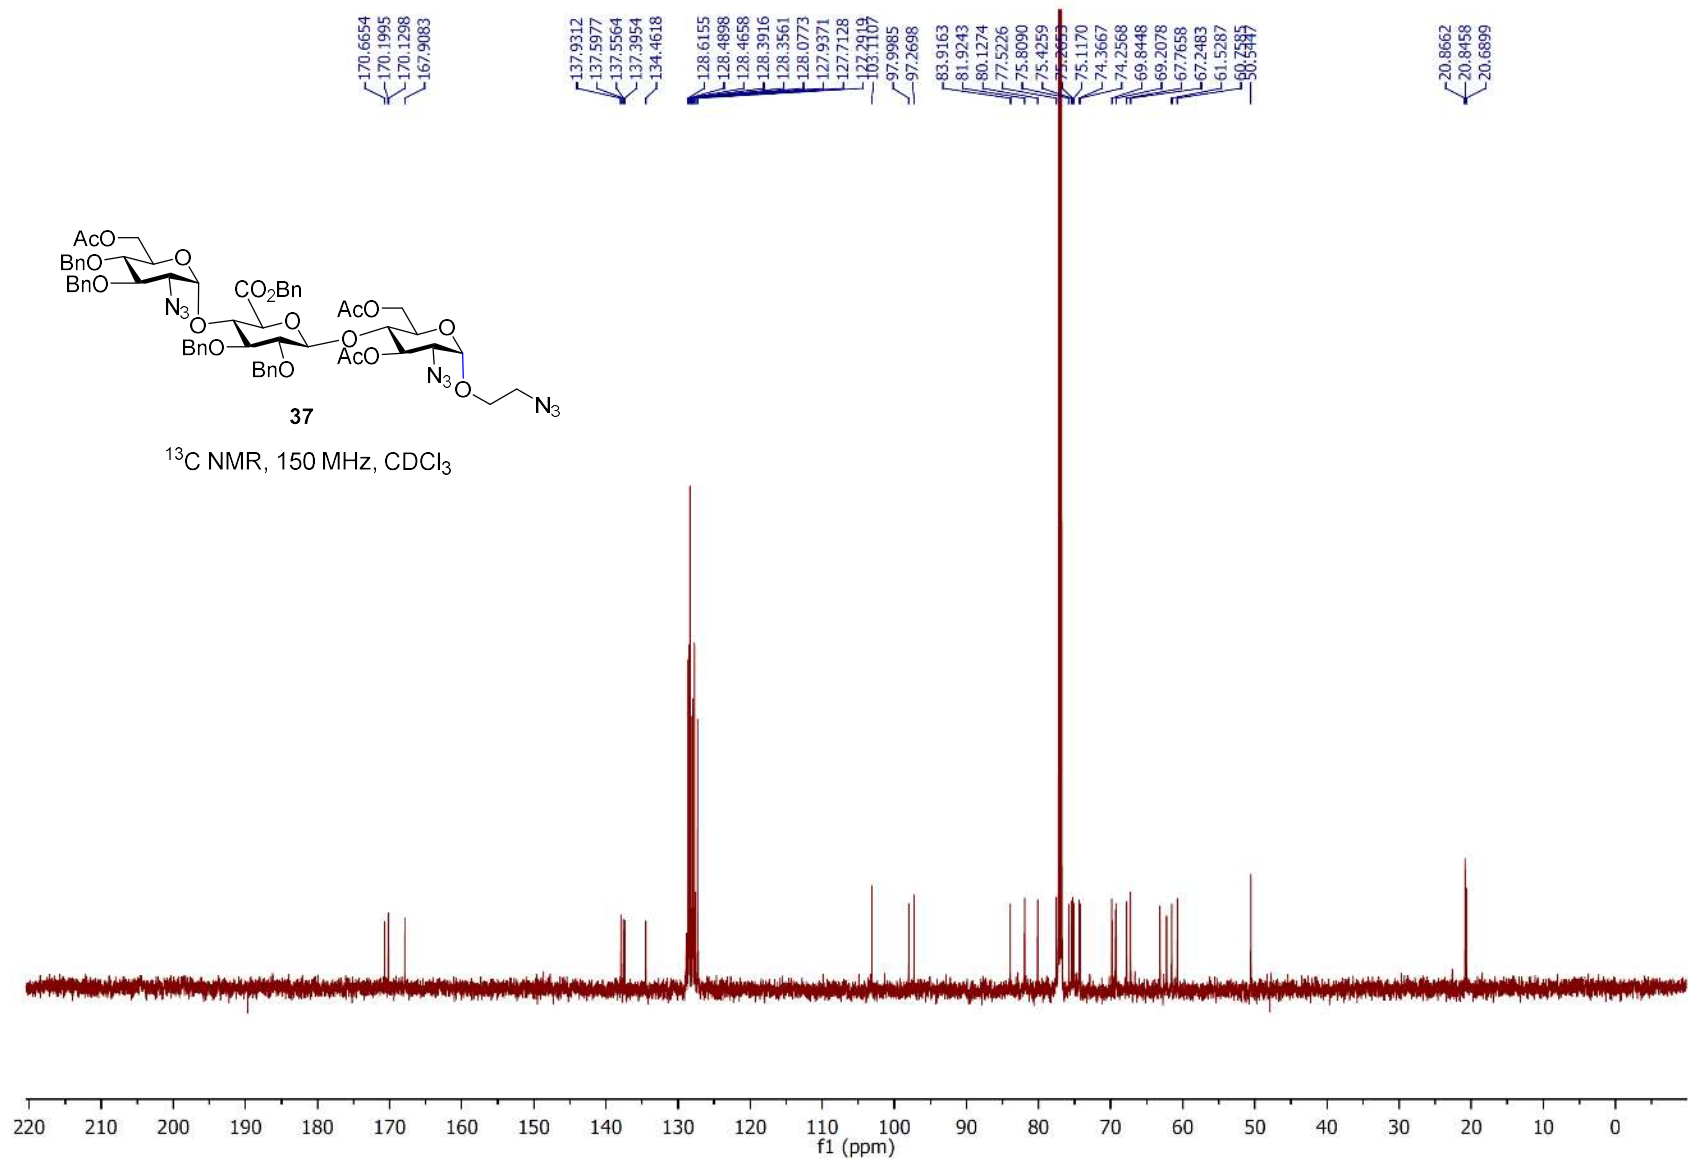

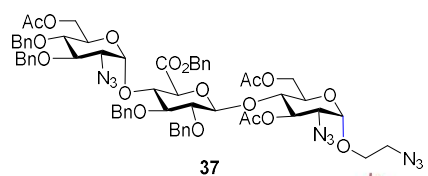

$^1\text{H}$ - $^{13}\text{C}$  HSQC, 600/150MHz,  $\text{CDCl}_3$

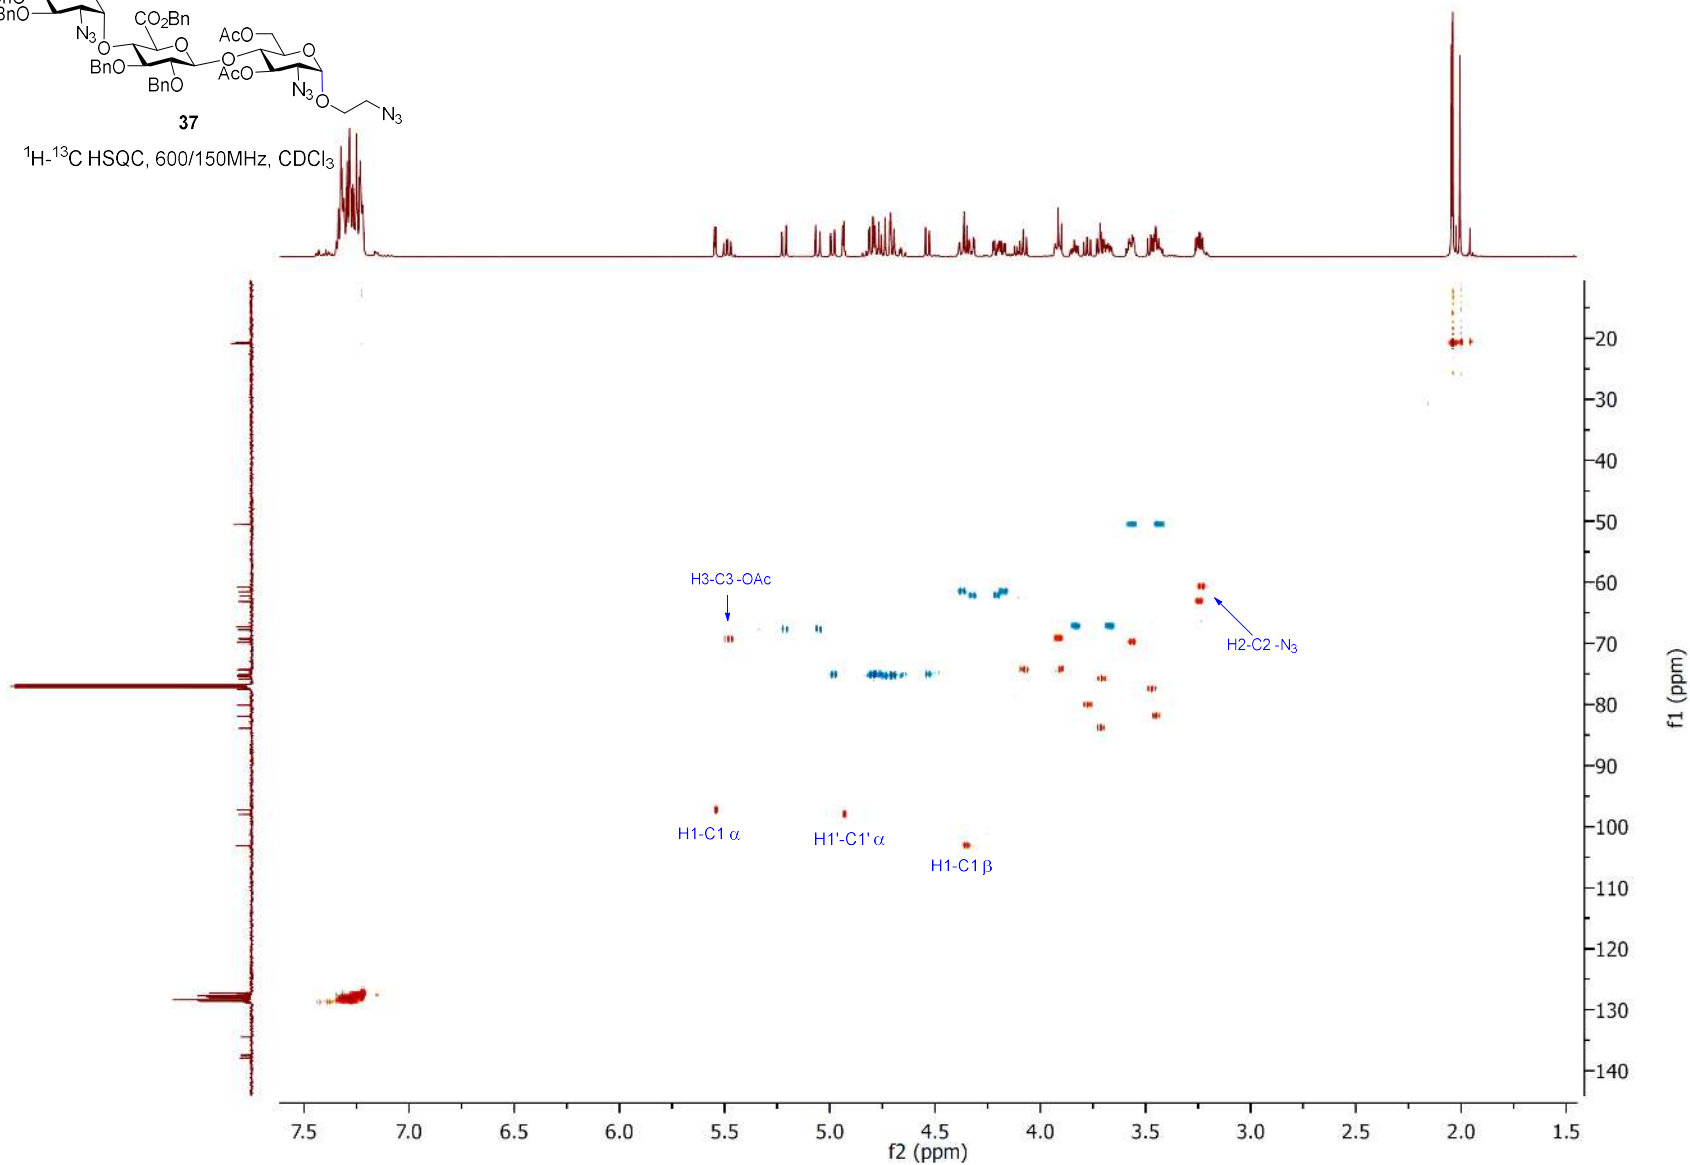

7.3308  
7.3201  
7.3173  
7.3093  
7.3065  
7.3041  
7.3015  
7.2975  
7.2879  
7.2862  
7.2832  
7.2802  
7.2706  
7.2680  
7.2656  
7.2628  
7.2580  
7.2506  
7.2361  
7.2323  
7.2230  
7.2209  
7.2169  
7.2136  
7.2099  
7.2034  
5.5411  
5.5350  
5.5299  
5.5209  
5.5095  
5.0662  
5.0456  
4.9781  
4.9714  
4.9610  
4.9535  
4.9453  
4.8051  
4.7844  
4.7661  
4.7512  
4.7474  
4.7337  
4.7286  
4.7118  
4.6958  
4.5436  
4.5256  
4.3578  
4.3444  
4.3378  
4.3250  
4.3154  
4.3125  
4.0655  
4.0498  
3.9028  
3.8866  
3.7874  
3.7703  
3.7580  
3.7049  
3.6922  
3.6901  
3.6765  
3.4864  
3.4700  
3.4542  
3.4242  
3.4195  
3.4101  
3.4061  
3.4023  
3.3959  
3.3886  
3.2556  
3.2494  
3.2383  
3.2321  
2.0429  
2.0300  
1.9970

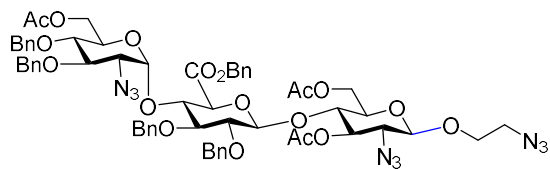

38

$^1\text{H}$  NMR, 600 MHz,  $\text{CDCl}_3$

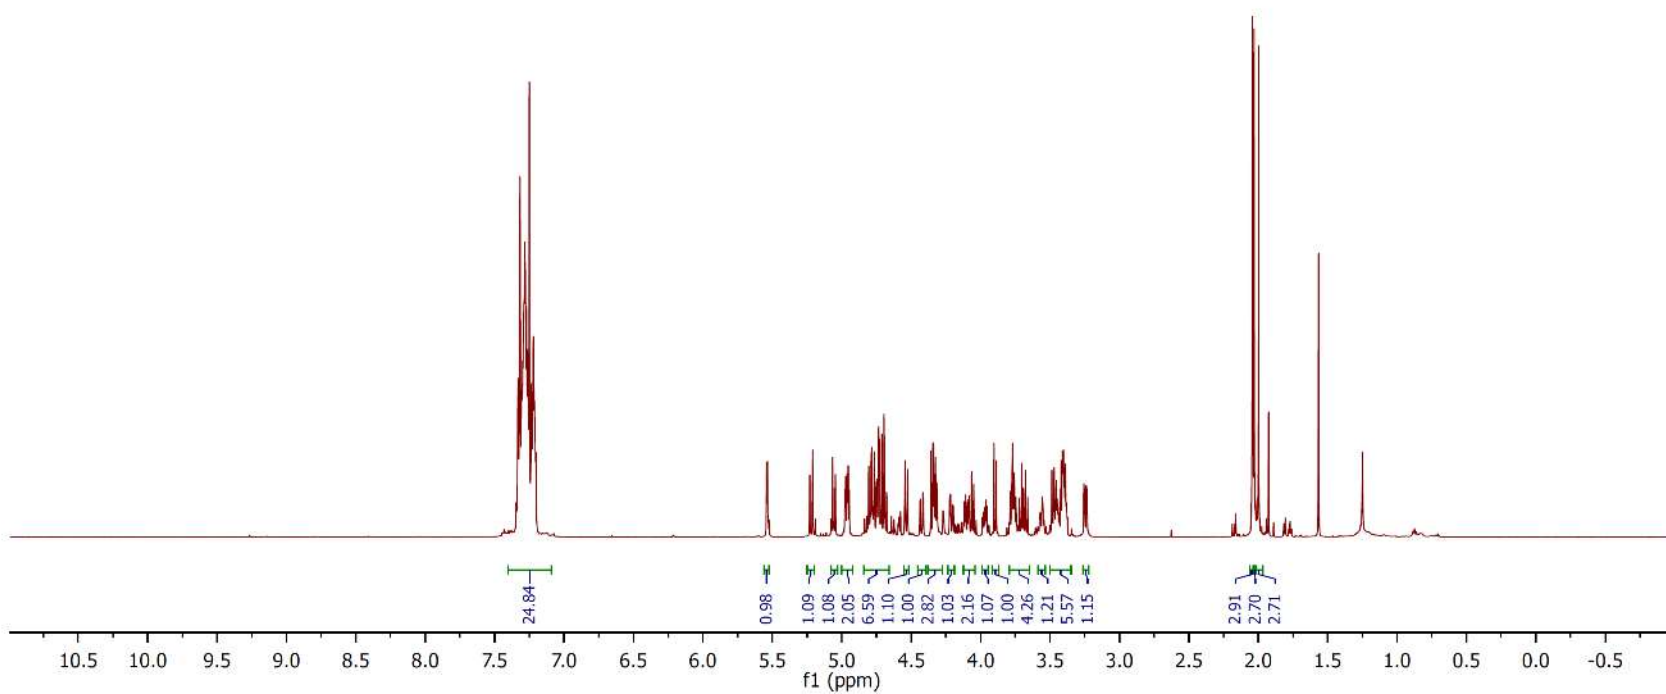

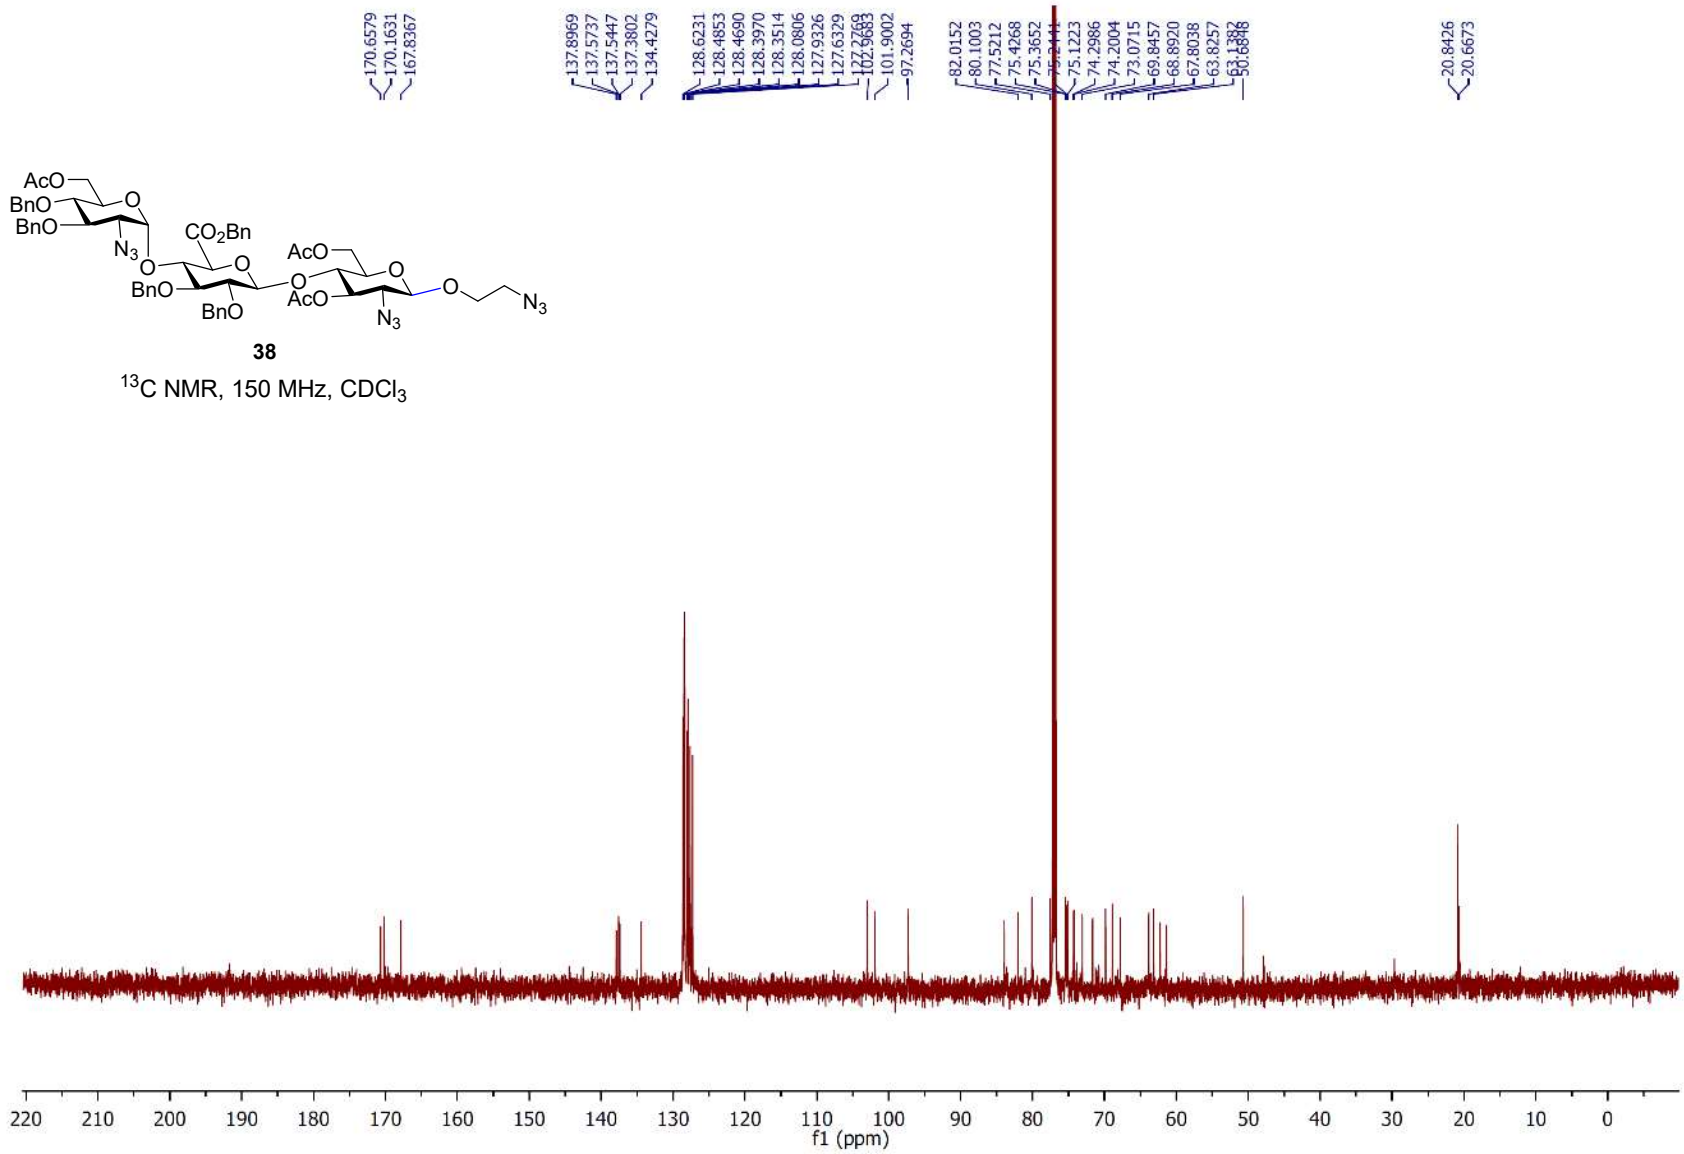

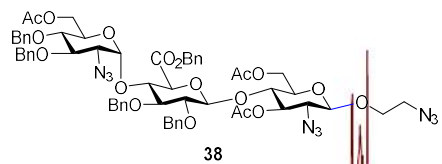

$^1\text{H}$ - $^{13}\text{C}$  HSQC, 600/150MHz,  $\text{CDCl}_3$

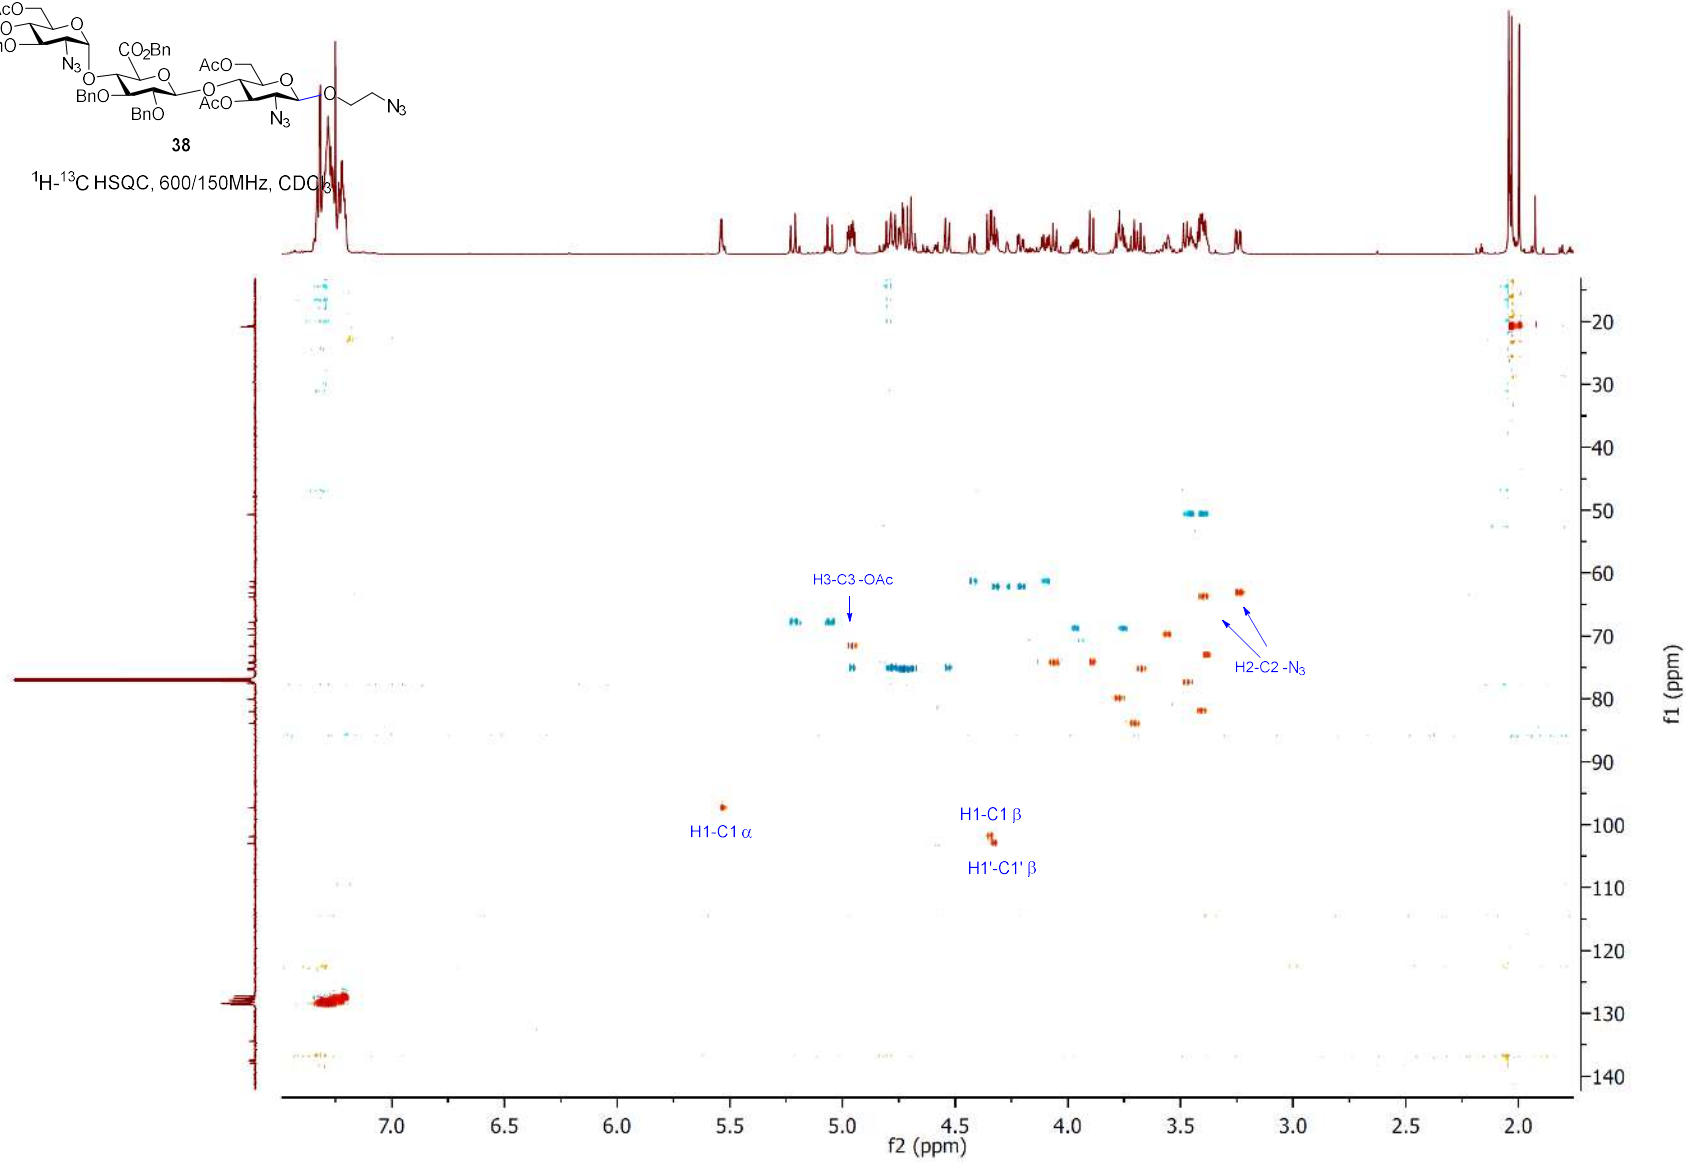

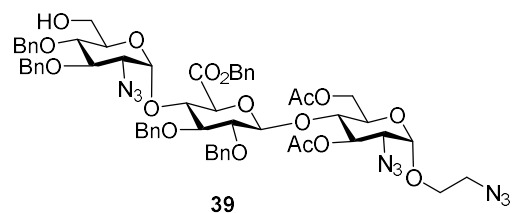

<sup>1</sup>H NMR, 600 MHz, CDCl<sub>3</sub>

7.3360  
7.3250  
7.3117  
7.3075  
7.2958  
7.2853  
7.2759  
7.2641  
7.2447  
7.2435  
7.2392  
7.2268  
7.2144  
5.5417  
5.5359  
5.1908  
5.0485  
4.9835  
4.9488  
4.9434  
4.8039  
4.7856  
4.7541  
4.7163  
4.6930  
4.6788  
4.5331  
4.5040  
4.4908  
4.0803  
3.9684  
3.9522  
3.8392  
3.8298  
3.7680  
3.7519  
3.7298  
3.6789  
3.4606  
3.4474  
3.2323  
3.2148  
1.9893

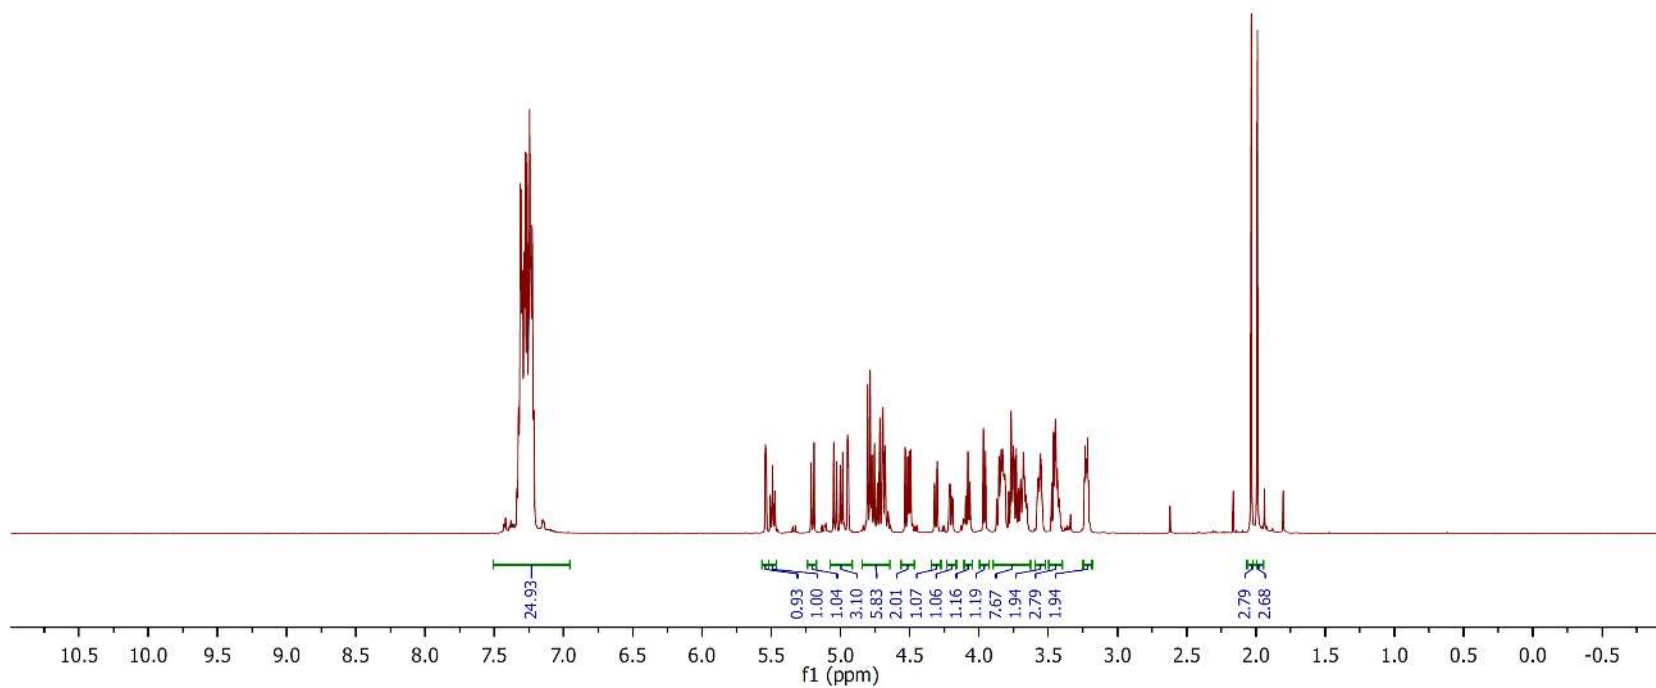

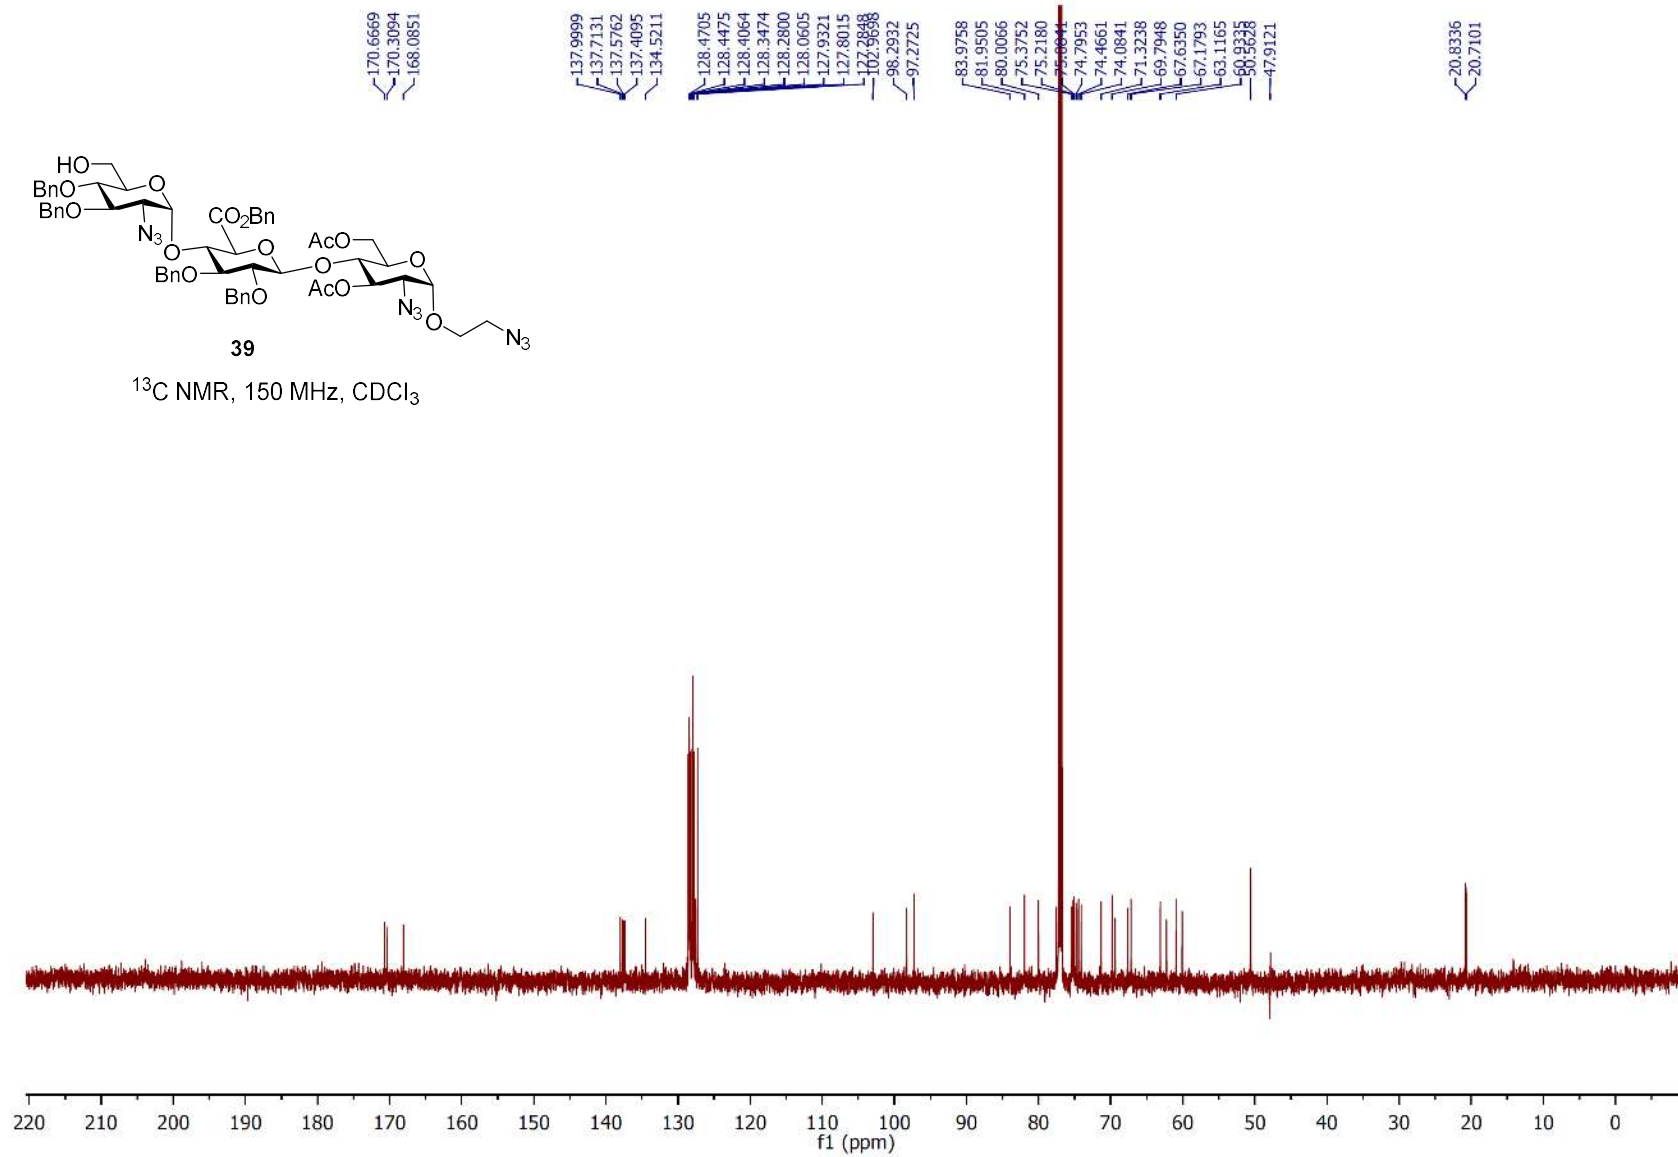

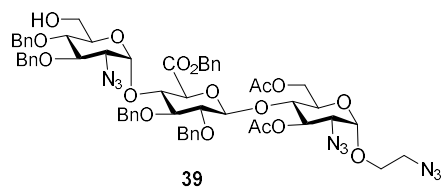

$^1\text{H}$ - $^1\text{H}$  COSY, 600 MHz,  $\text{CDCl}_3$

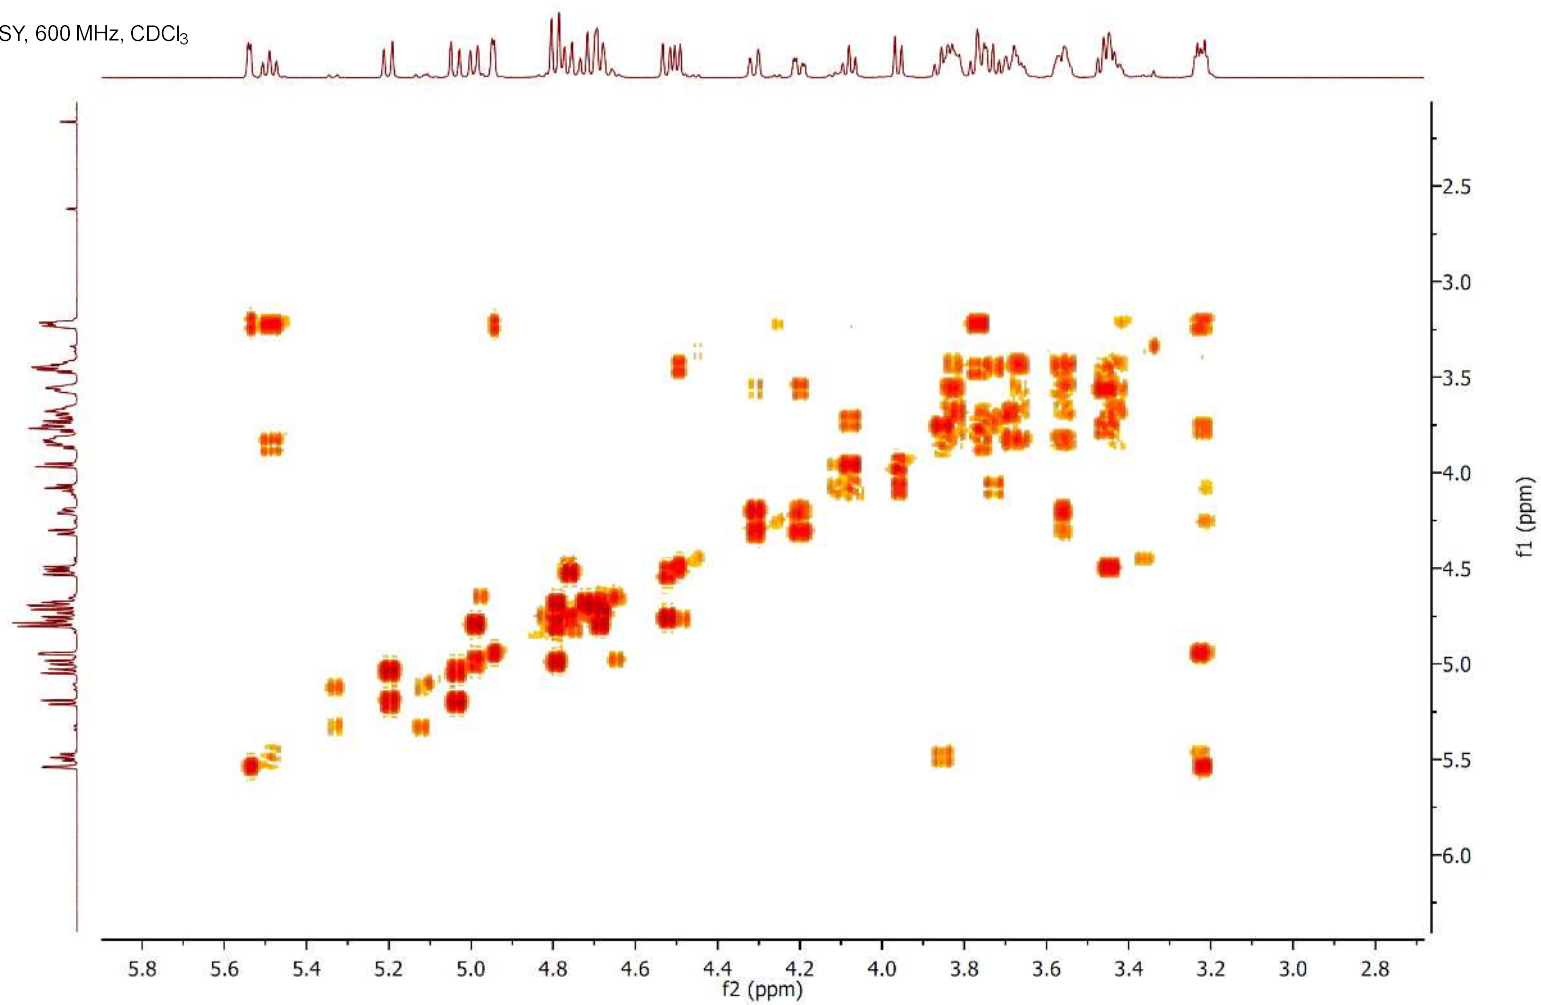



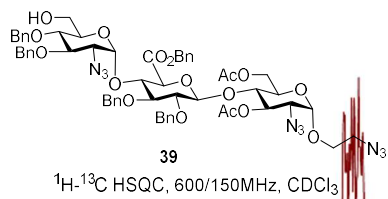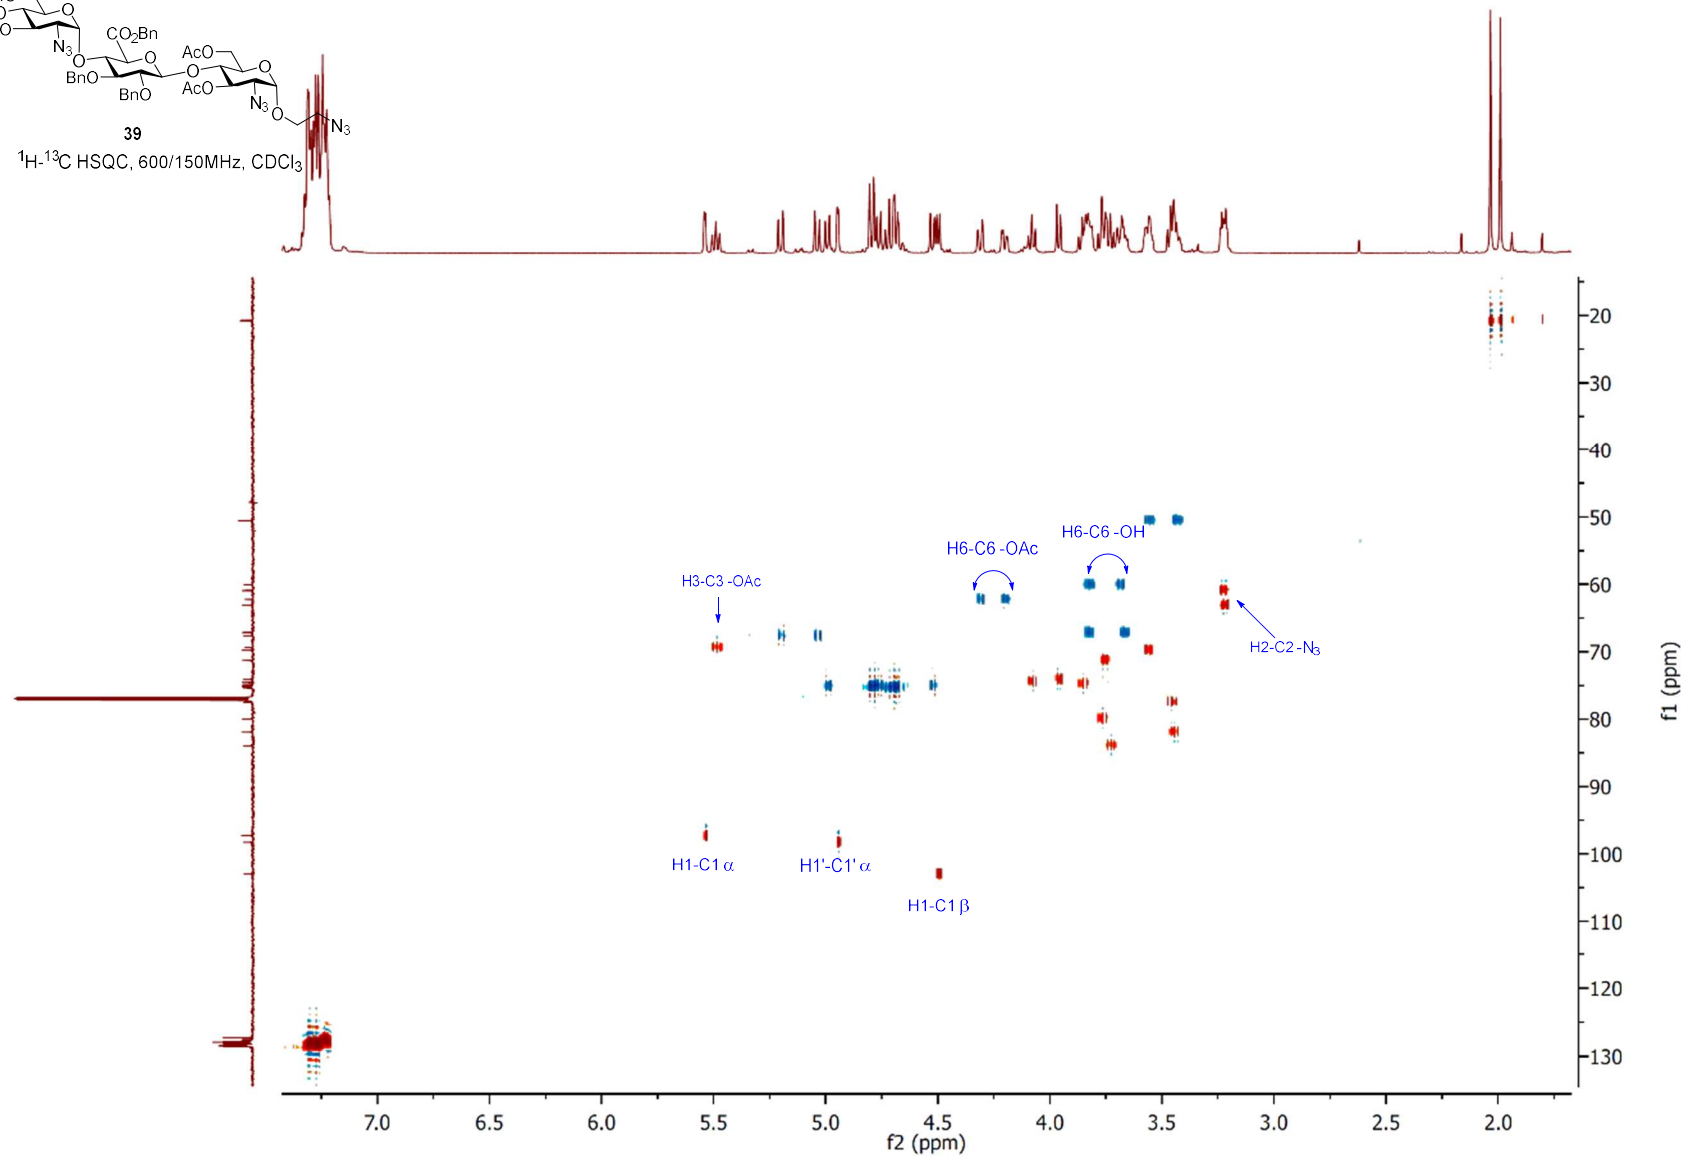

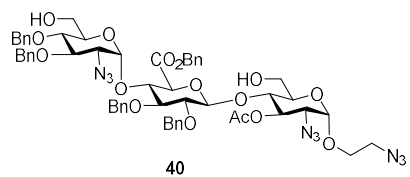

<sup>1</sup>H NMR, 600 MHz, CDCl<sub>3</sub>

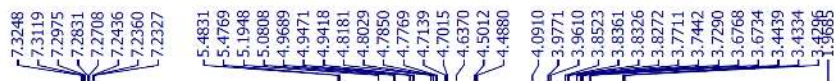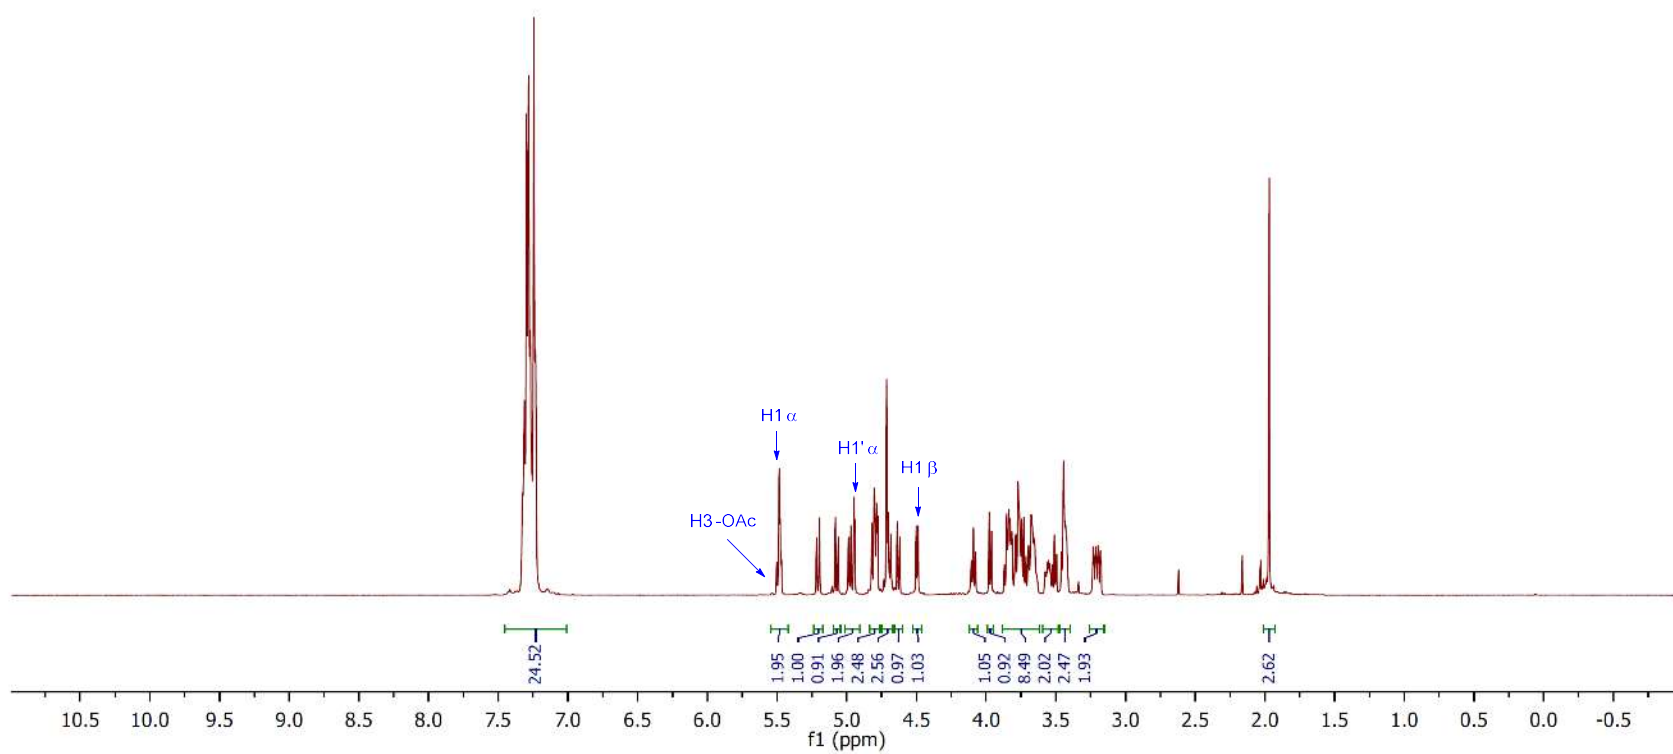

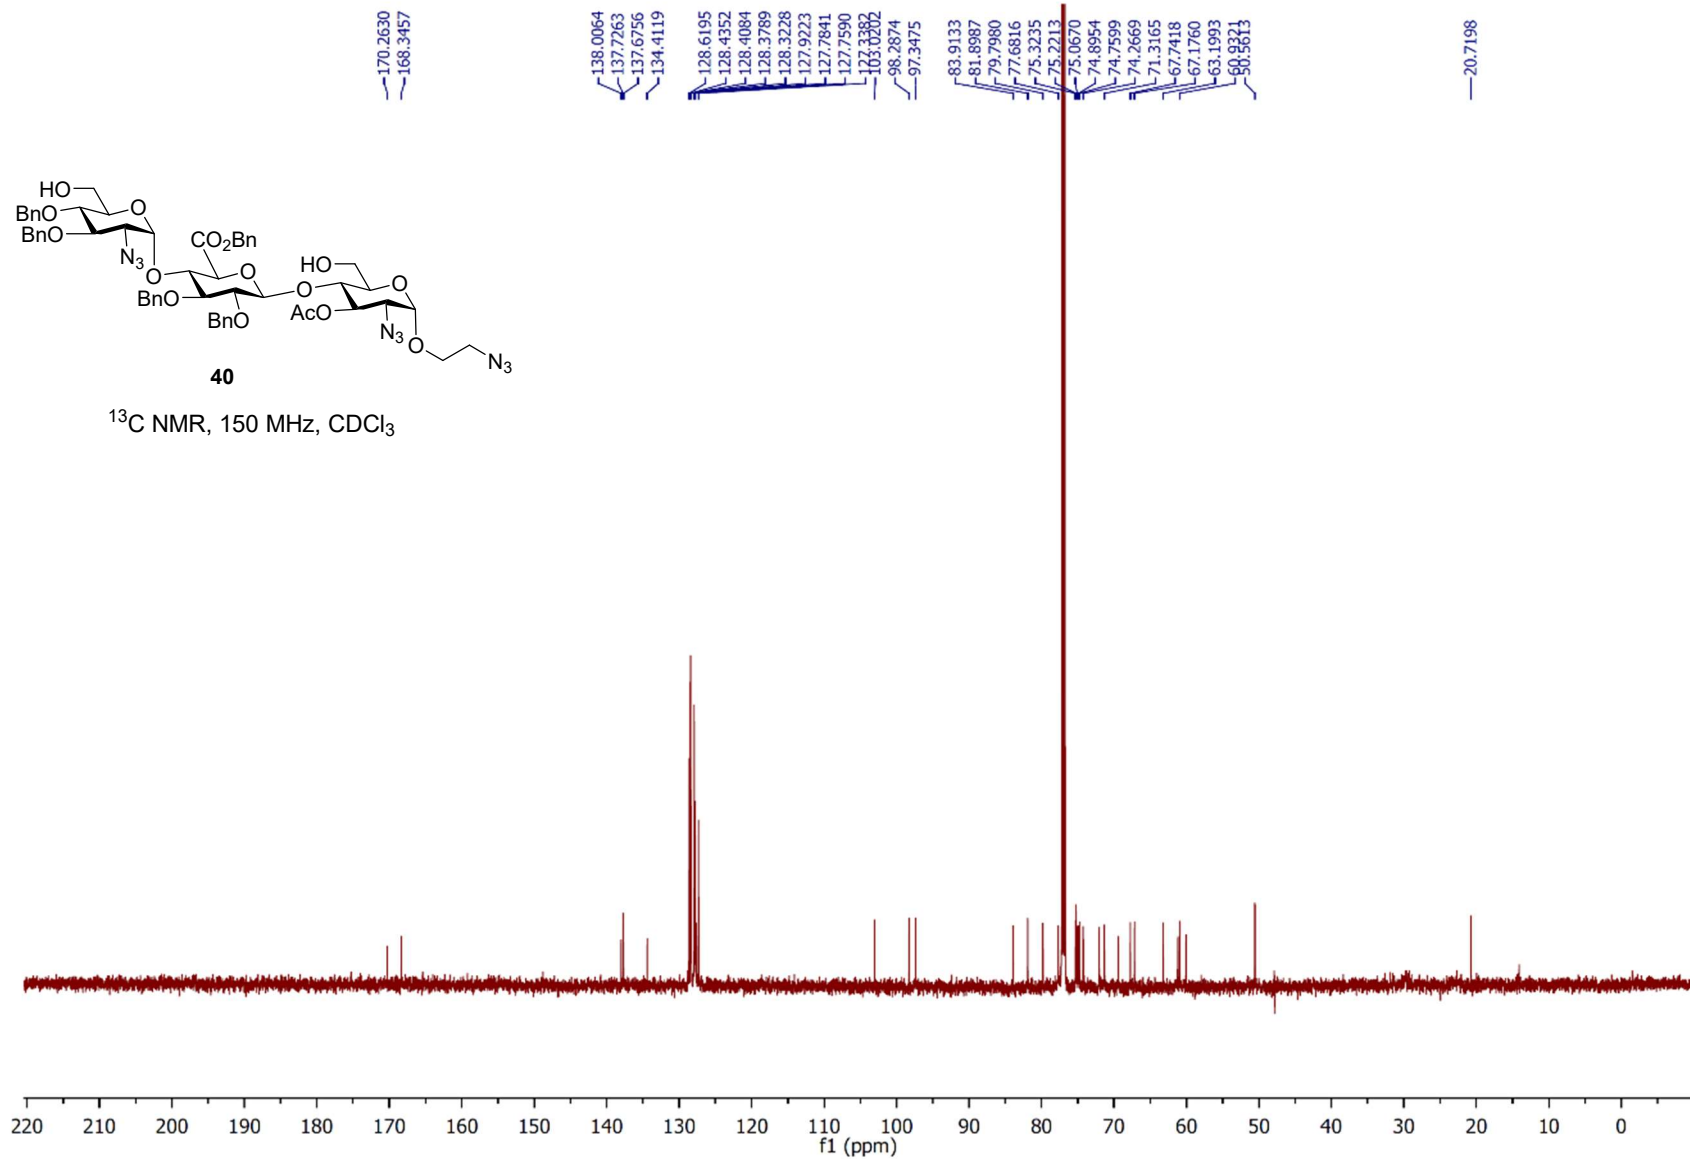

7.3251  
7.3129  
7.3089  
7.2988  
7.2899  
7.2847  
7.2779  
7.2743  
7.2715  
7.2613  
7.2464  
7.2315  
7.2264  
7.2205  
7.2140  
7.2110  
7.2004  
5.5381  
5.5319  
5.5217  
5.2010  
5.0530  
5.0324  
4.9036  
4.9778  
4.9616  
4.8028  
4.7849  
4.7751  
4.7571  
4.7486  
4.7299  
4.7165  
4.6948  
4.6826  
4.6773  
4.6640  
4.5557  
4.5177  
4.4995  
4.4863  
4.3983  
4.3849  
4.3056  
4.3027  
4.2091  
4.0648  
4.0496  
3.9643  
3.9482  
3.8355  
3.7879  
3.7825  
3.7778  
3.7705  
3.7686  
3.7656  
3.7596  
3.7516  
3.7396  
3.7245  
3.7096  
3.4749  
3.4599  
3.4580  
3.4528  
3.4469  
3.4433  
3.4373  
3.4223  
3.4125  
3.4088  
3.3991  
3.3950  
3.3818  
3.2652  
3.2488  
3.2296  
3.2235  
3.2123  
3.2061  
2.0351  
1.9906

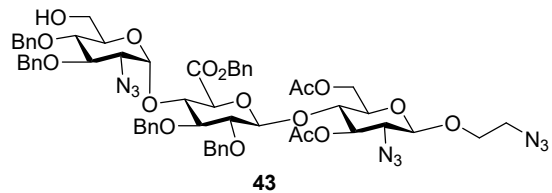

$^1\text{H NMR}$ , 600 MHz,  $\text{CDCl}_3$

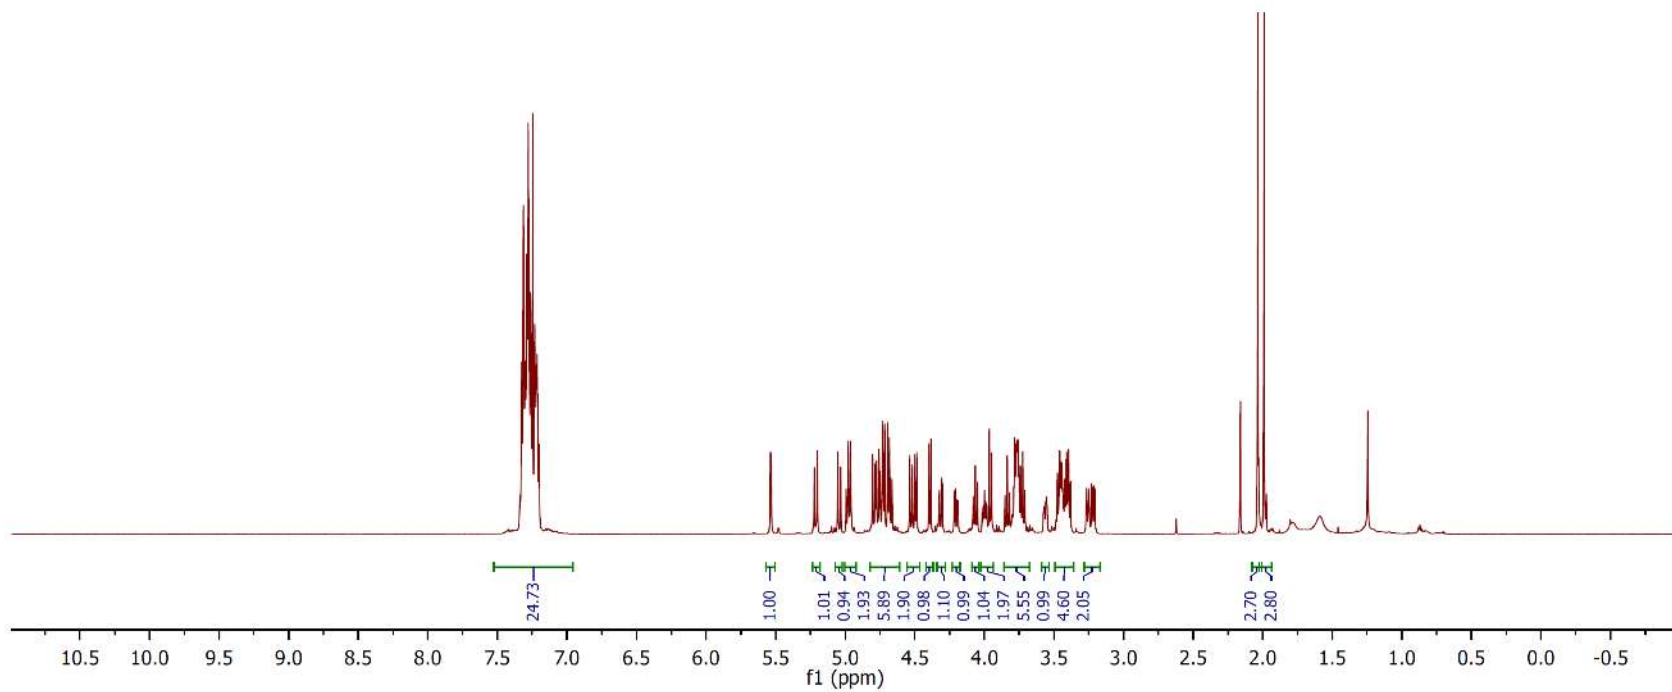

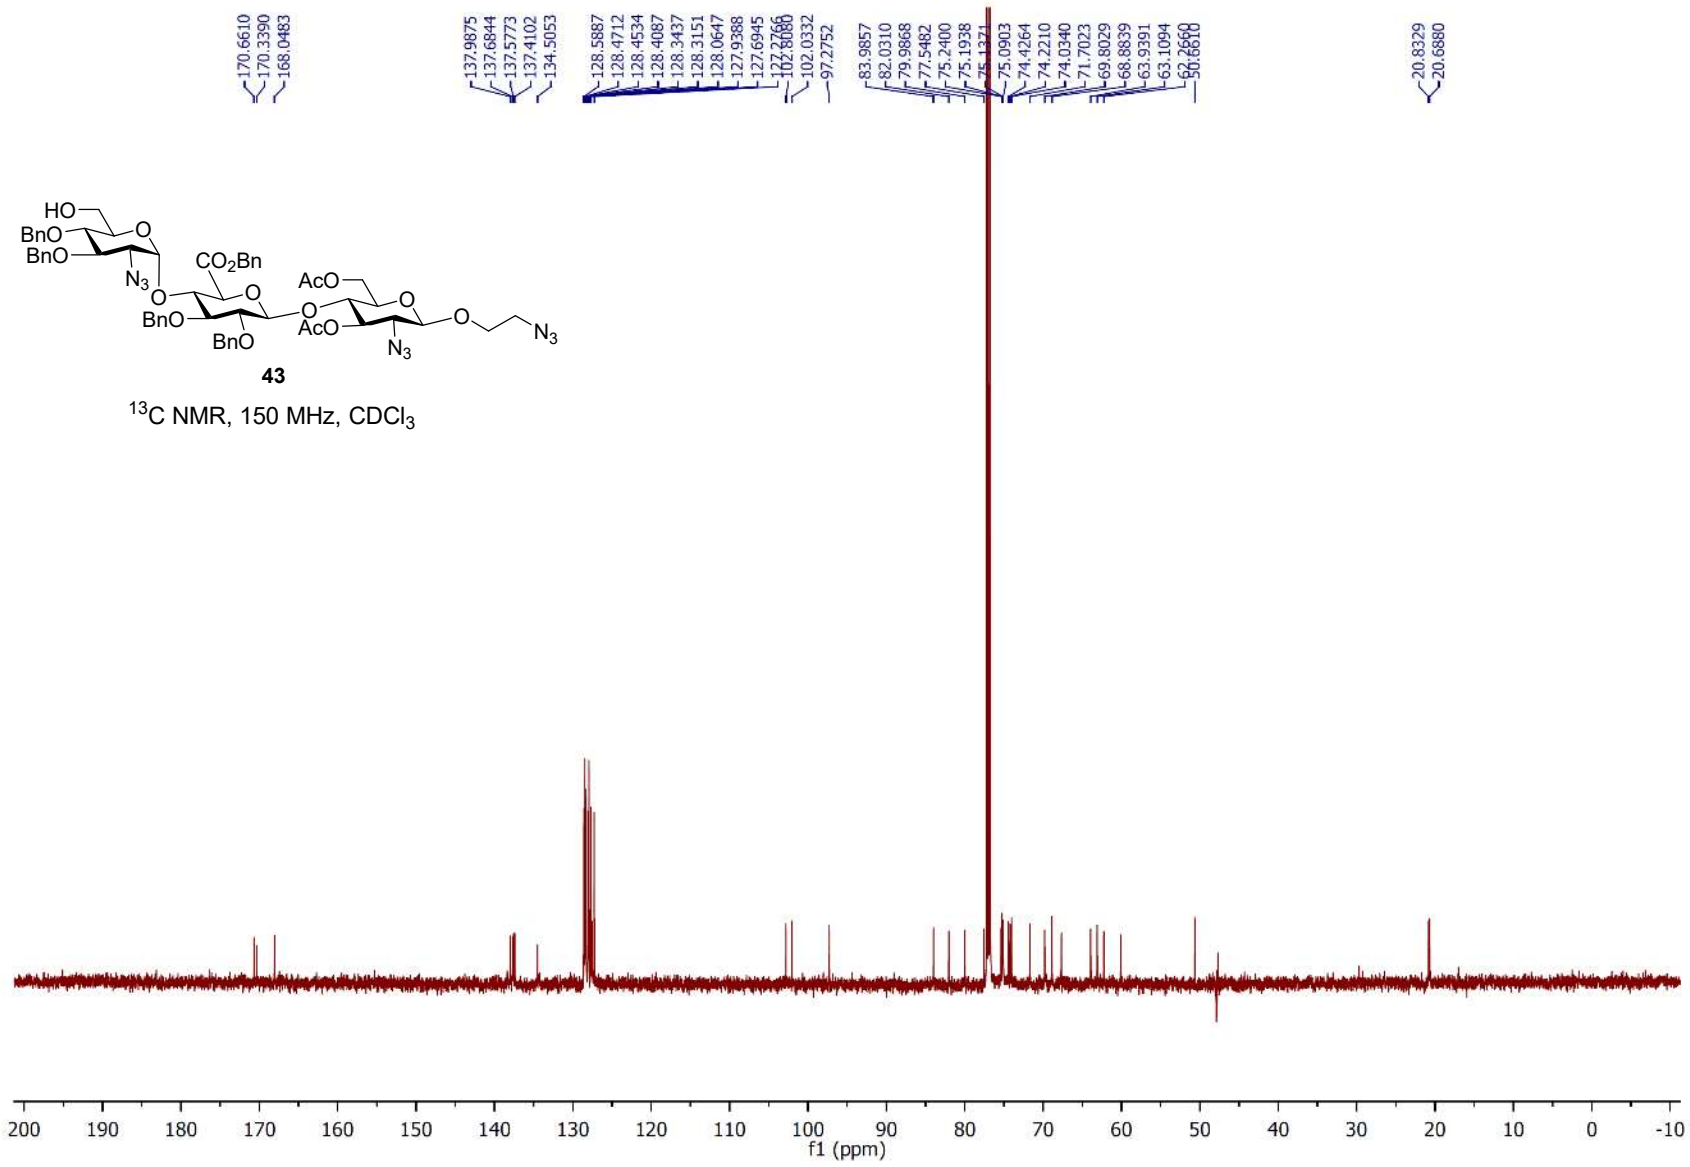

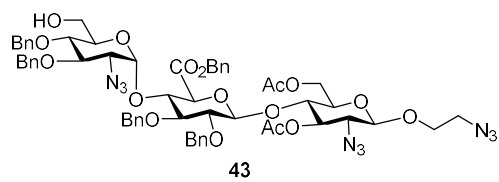

$^1\text{H}$ - $^1\text{H}$  COSY, 600 MHz,  $\text{CDCl}_3$

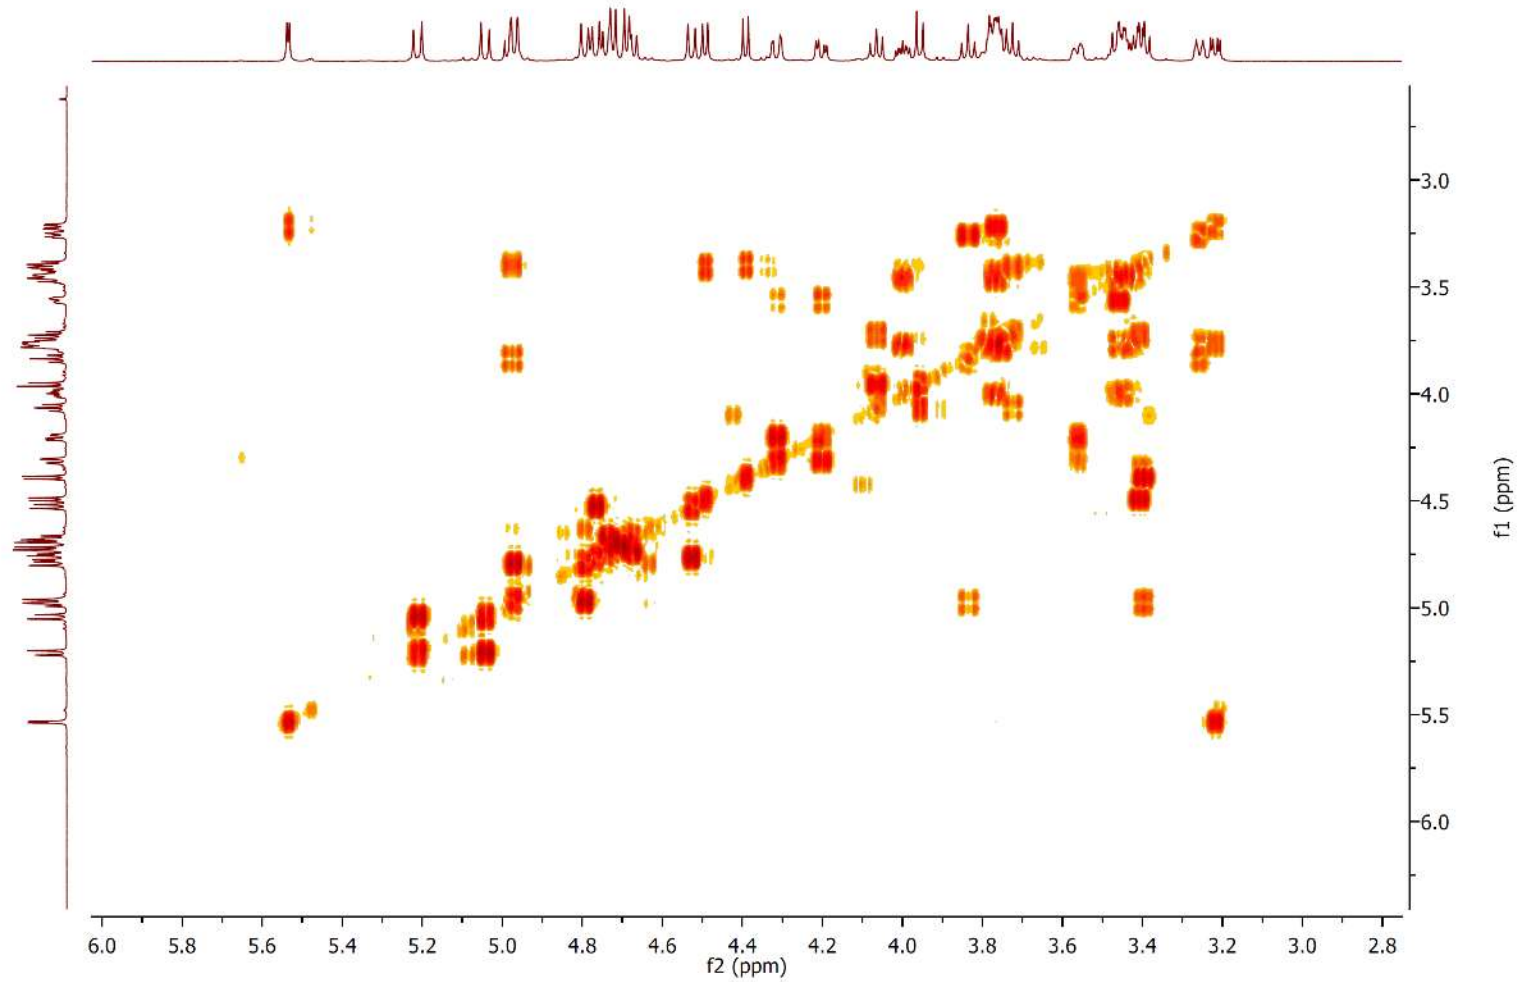

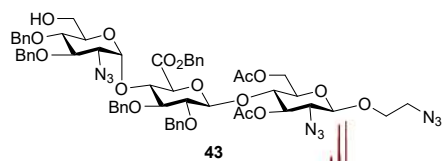

$^1\text{H}$ - $^{13}\text{C}$  HSQC, 600/150MHz,  $\text{CDCl}_3$

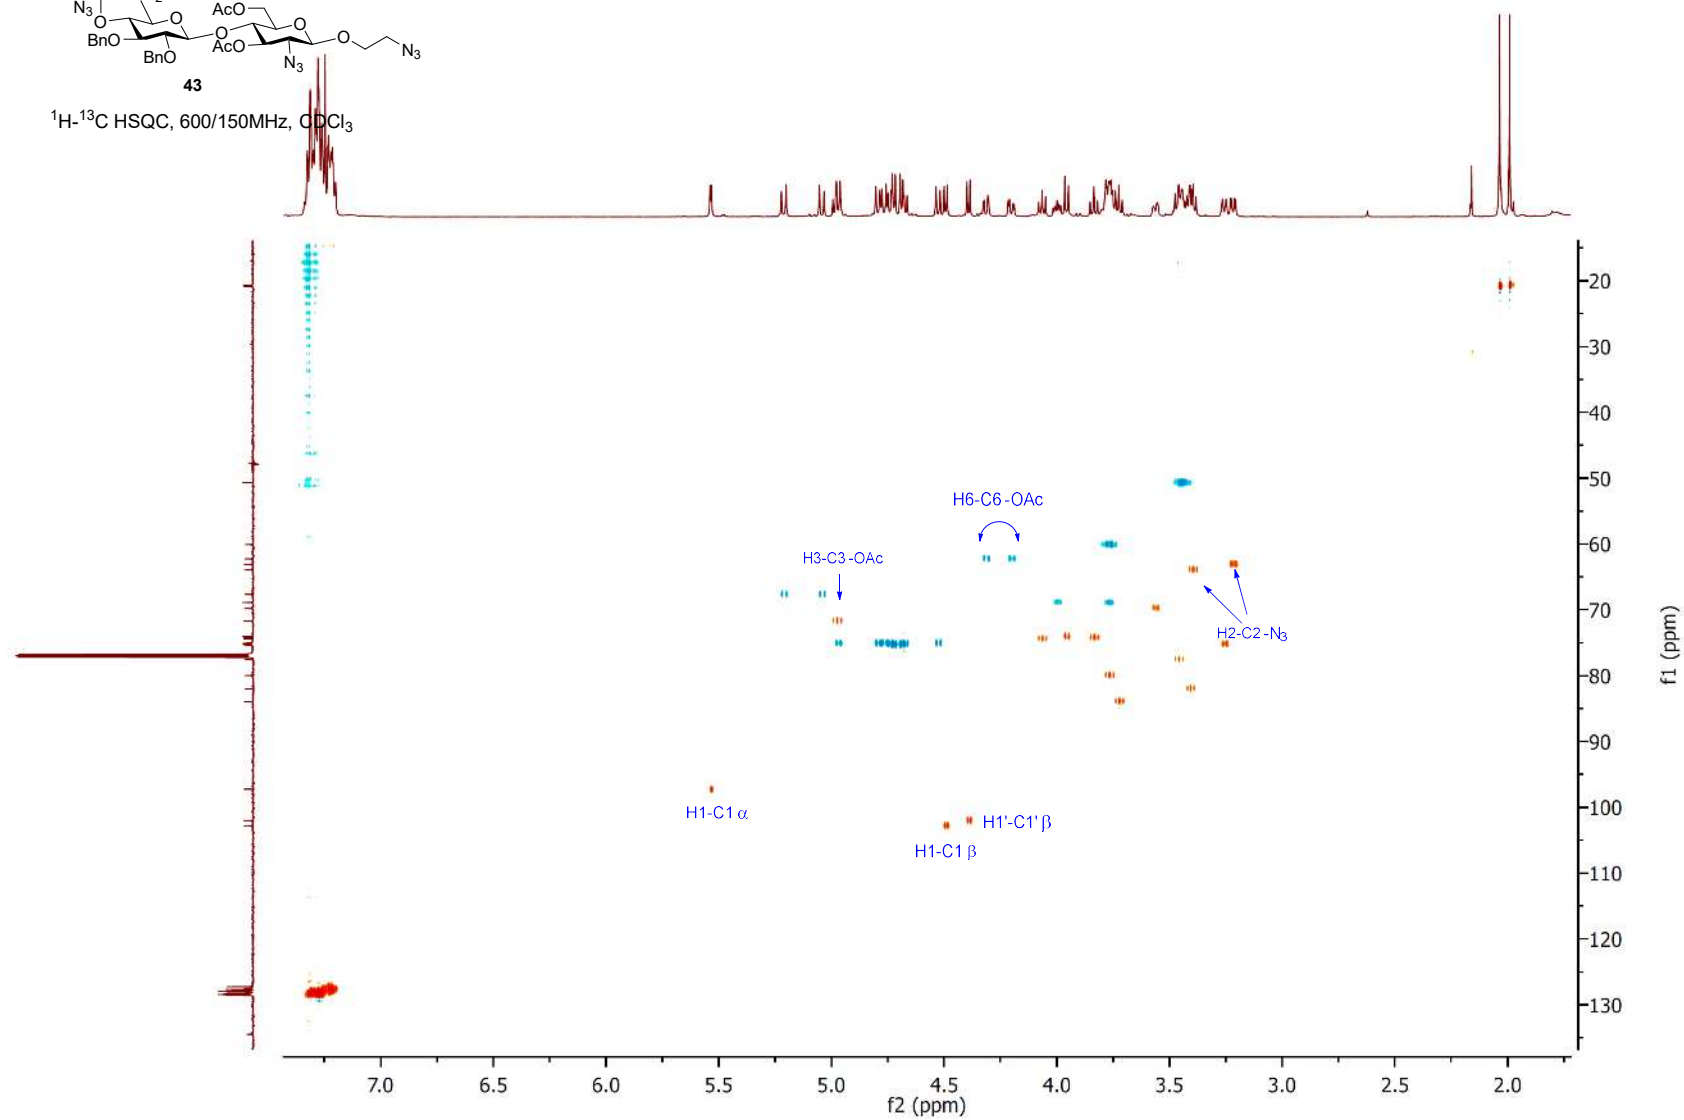

7.3412  
7.3385  
7.3292  
7.3260  
7.3132  
7.3111  
7.3020  
7.2996  
7.2961  
7.2854  
7.2728  
7.2704  
7.2665  
7.2643  
7.2520  
7.2481  
7.2453  
7.2420  
7.2257  
7.2120  
5.4871  
5.4811  
5.2273  
5.2067  
5.0906  
5.0699  
4.9936  
4.9773  
4.9714  
4.9602  
4.9535  
4.8214  
4.8029  
4.7837  
4.7539  
4.7355  
4.7192  
4.7163  
4.6904  
4.6717  
4.6445  
4.6261  
4.5034  
4.4902  
4.3984  
4.3850  
4.0813  
4.0654  
3.9991  
3.9917  
3.9811  
3.9788  
3.9626  
3.8537  
3.8377  
3.8214  
3.7905  
3.7848  
3.7754  
3.7676  
3.7608  
3.7500  
3.7446  
3.7298  
3.7147  
3.5169  
3.5008  
3.4602  
3.4463  
3.4434  
3.4290  
3.4245  
3.4126  
3.3990  
3.3956  
3.3820  
3.2658  
3.2494  
3.2019  
3.1958  
3.1846  
3.1784  
1.9744

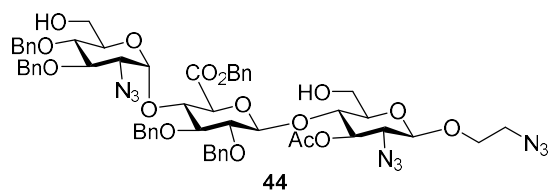

<sup>1</sup>H NMR, 600 MHz, CDCl<sub>3</sub>

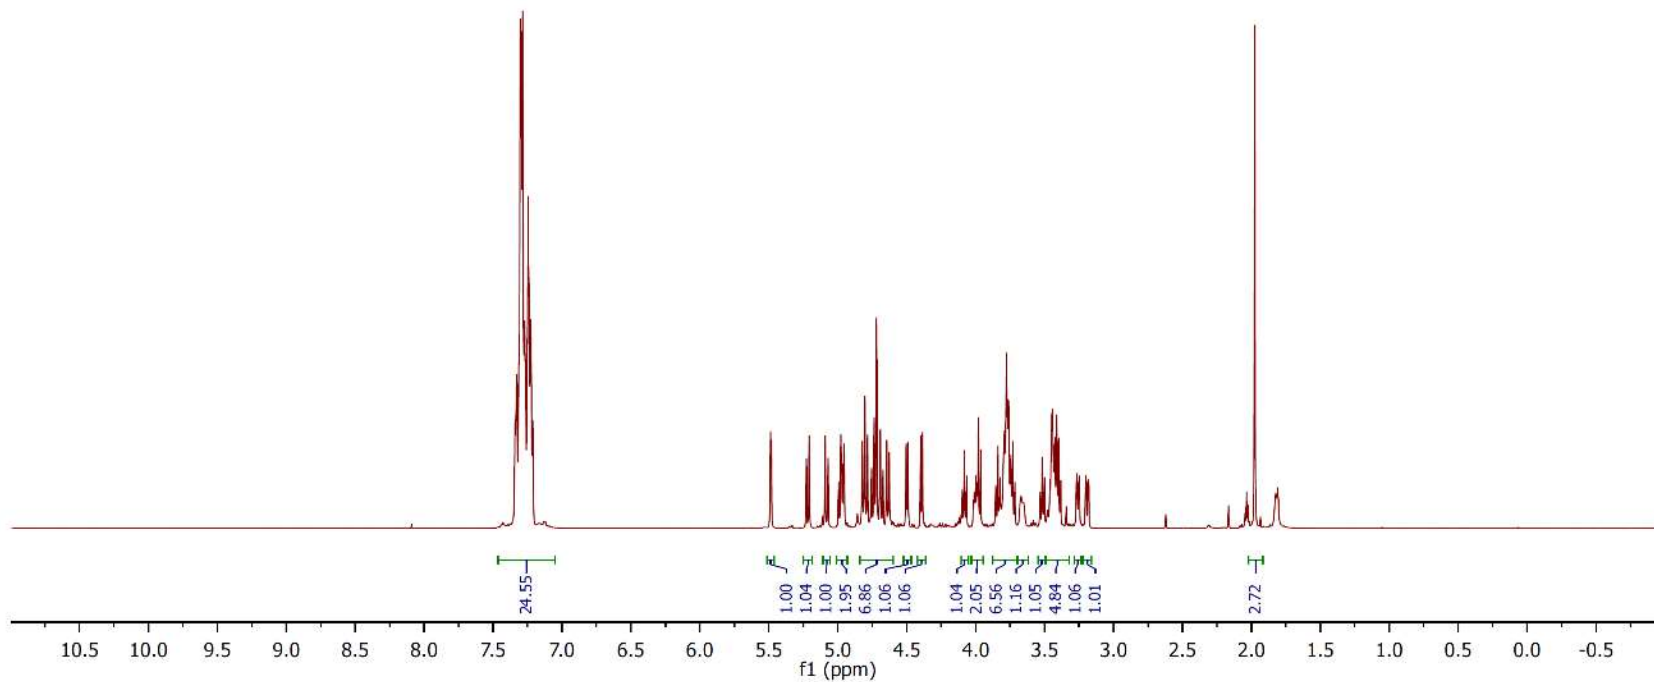



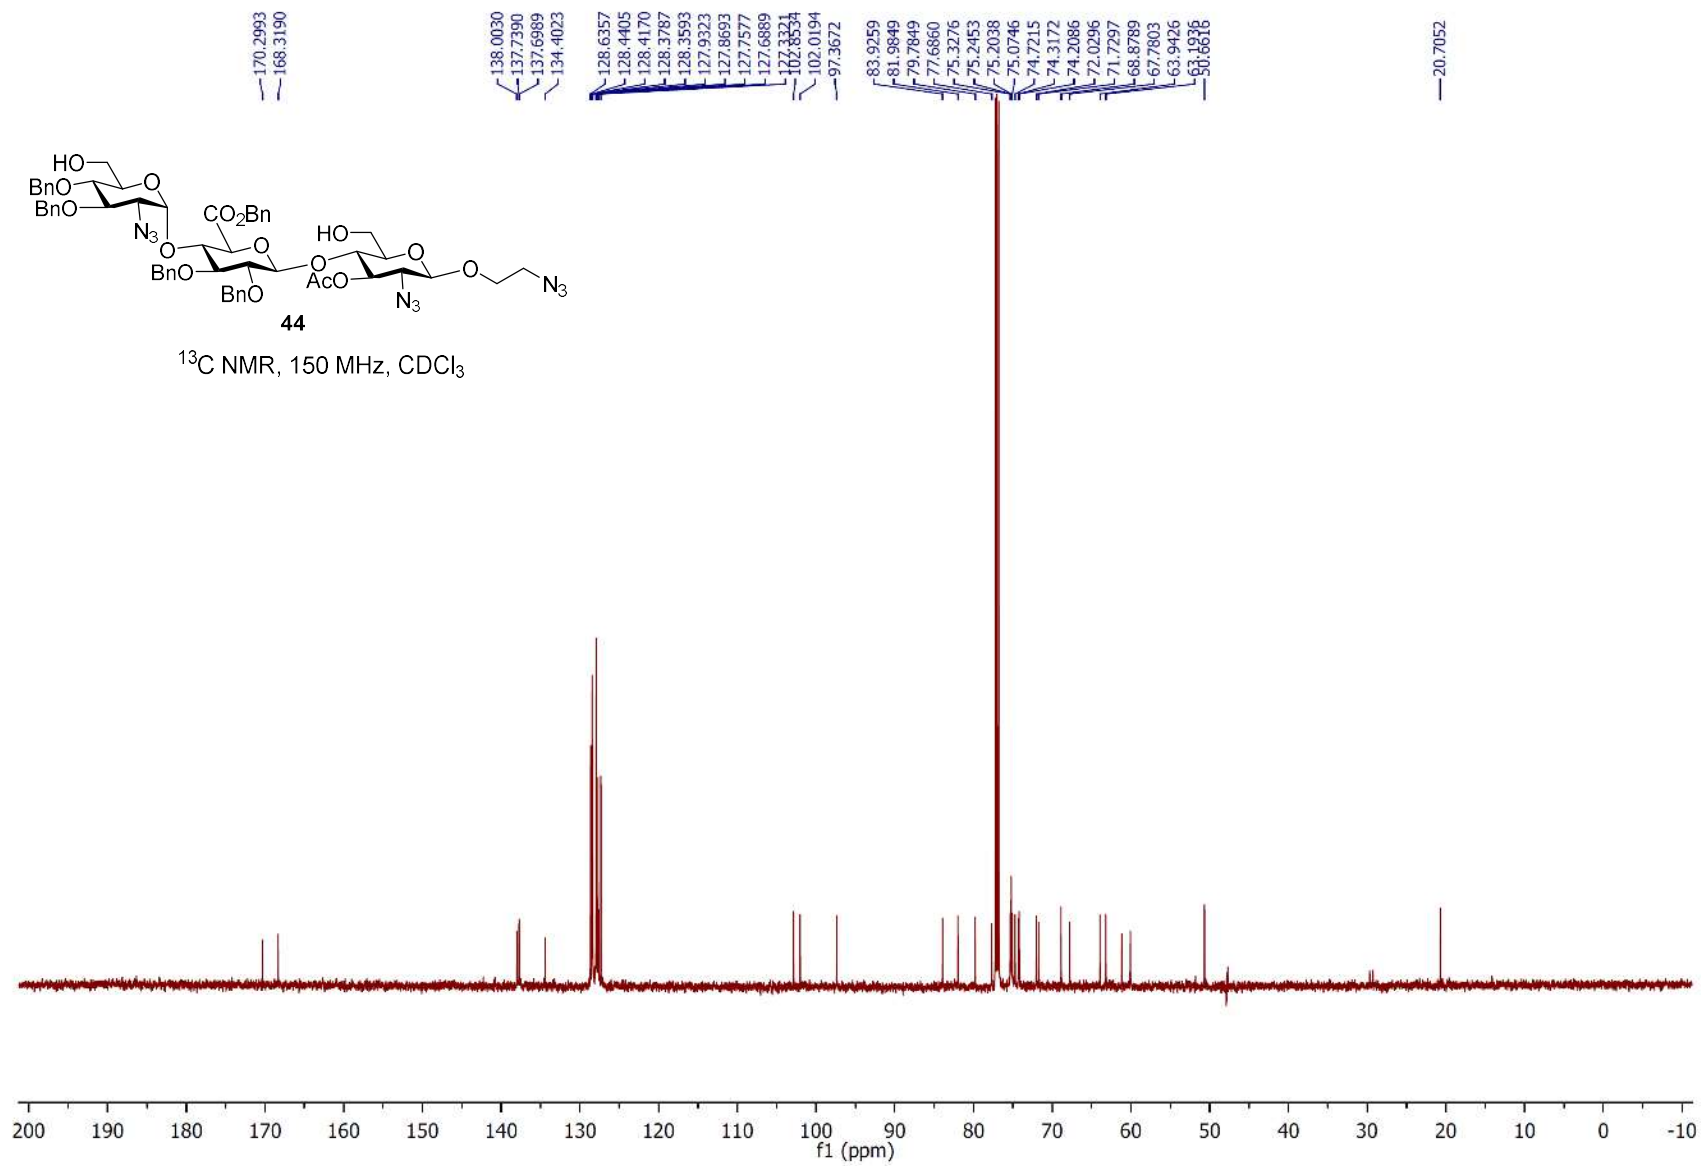

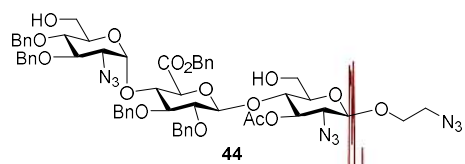

$^1\text{H}$ - $^{13}\text{C}$  HSQC, 600/150MHz,  $\text{CDCl}_3$

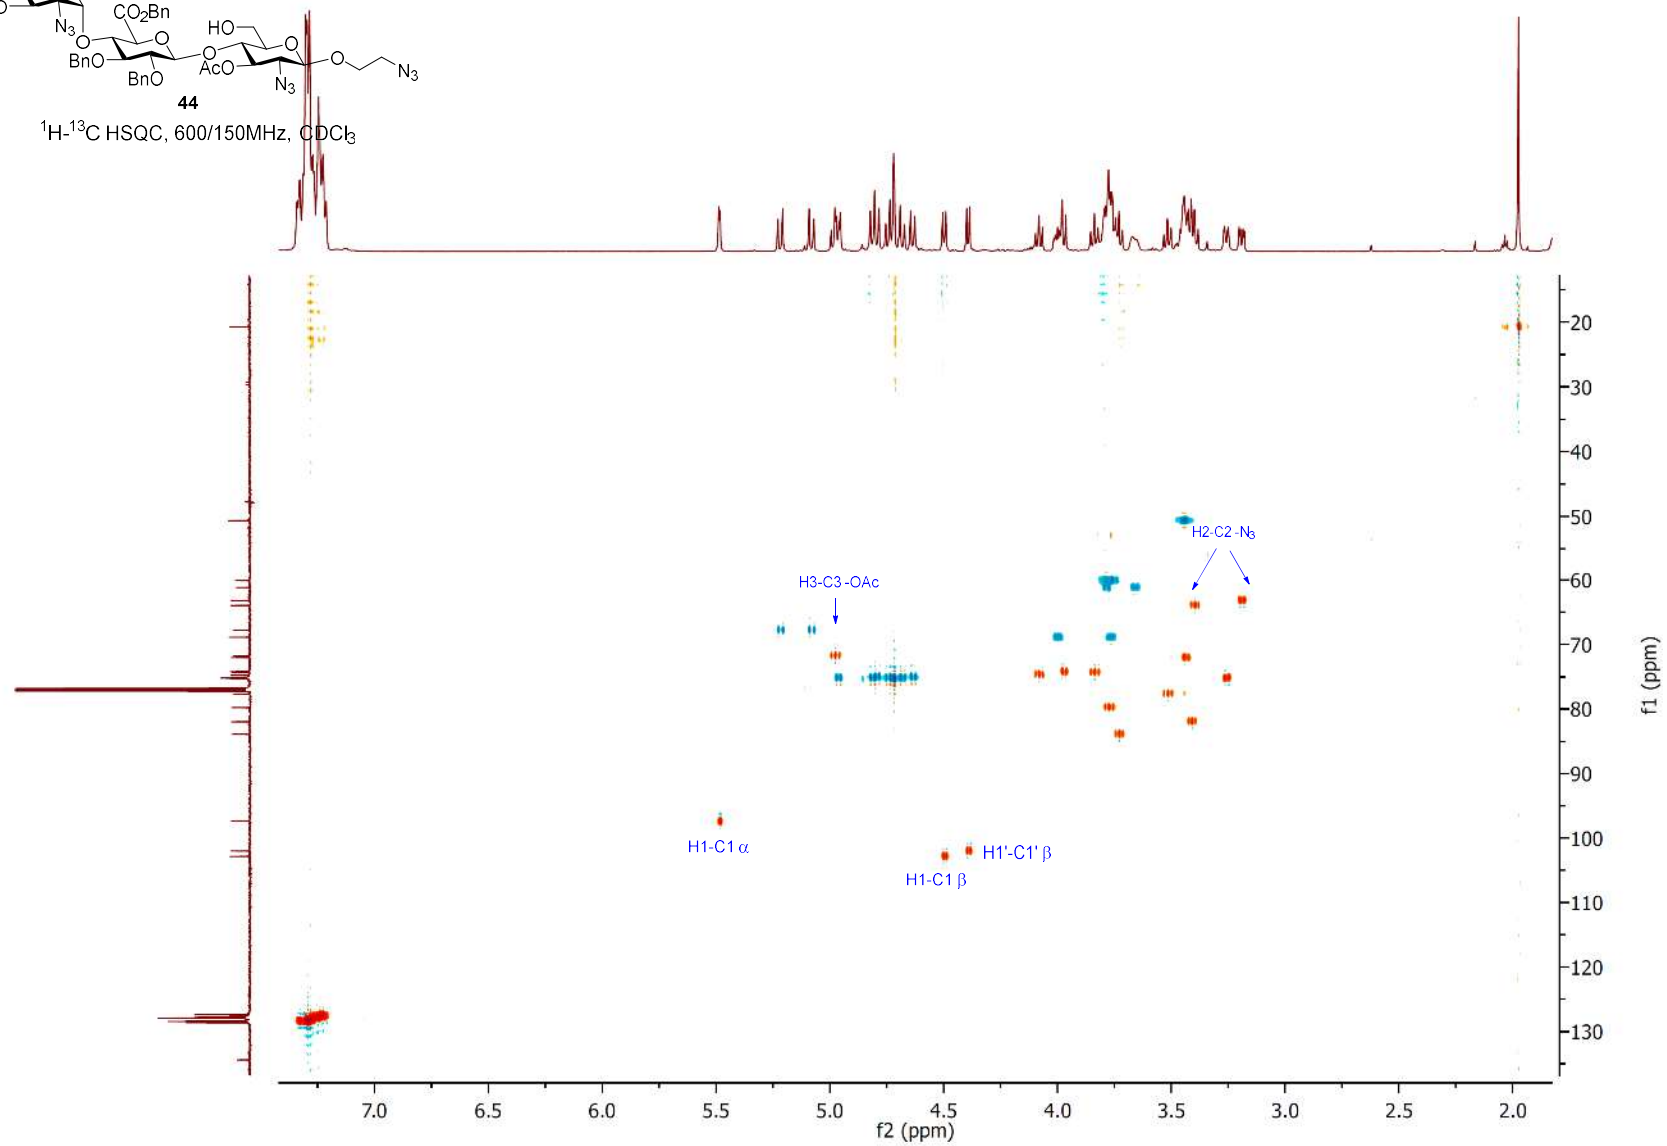

7.8752  
7.8613  
7.8501  
7.8368  
7.8073  
7.7574  
7.7427  
7.7467  
7.74614  
7.4574  
7.4548  
7.4520  
7.4498  
7.4474  
7.4456  
7.4340  
7.3754  
7.3629  
7.3533  
7.3509  
7.3396  
7.3375  
7.3288  
7.3272  
7.3245  
7.3202  
7.3154  
7.3127  
7.3106  
7.3079  
7.3054  
7.3011  
7.2950  
7.2880  
7.2848  
7.2800  
7.2760  
7.2683  
7.2629  
7.2472  
7.1802  
7.1703  
7.1678  
7.0240  
7.0123  
5.5185  
5.5123  
5.0150  
4.9969  
4.9308  
4.9248  
4.8799  
4.8606  
4.8539  
4.7806  
4.7602  
4.7510  
4.6821  
4.6634  
4.6454  
4.5762  
4.4877  
4.4850  
4.4716  
4.0454  
4.0303  
4.0296  
3.8347  
3.8175  
3.7652  
3.7490  
3.7422  
3.7260  
3.6615  
3.5017  
3.4613  
3.4003  
3.3757  
3.3696  
3.3622  
3.3585  
3.3561  
3.3157

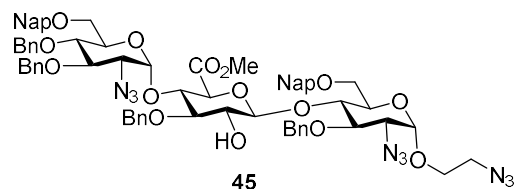

$^1\text{H}$  NMR, 600 MHz,  $\text{CDCl}_3$

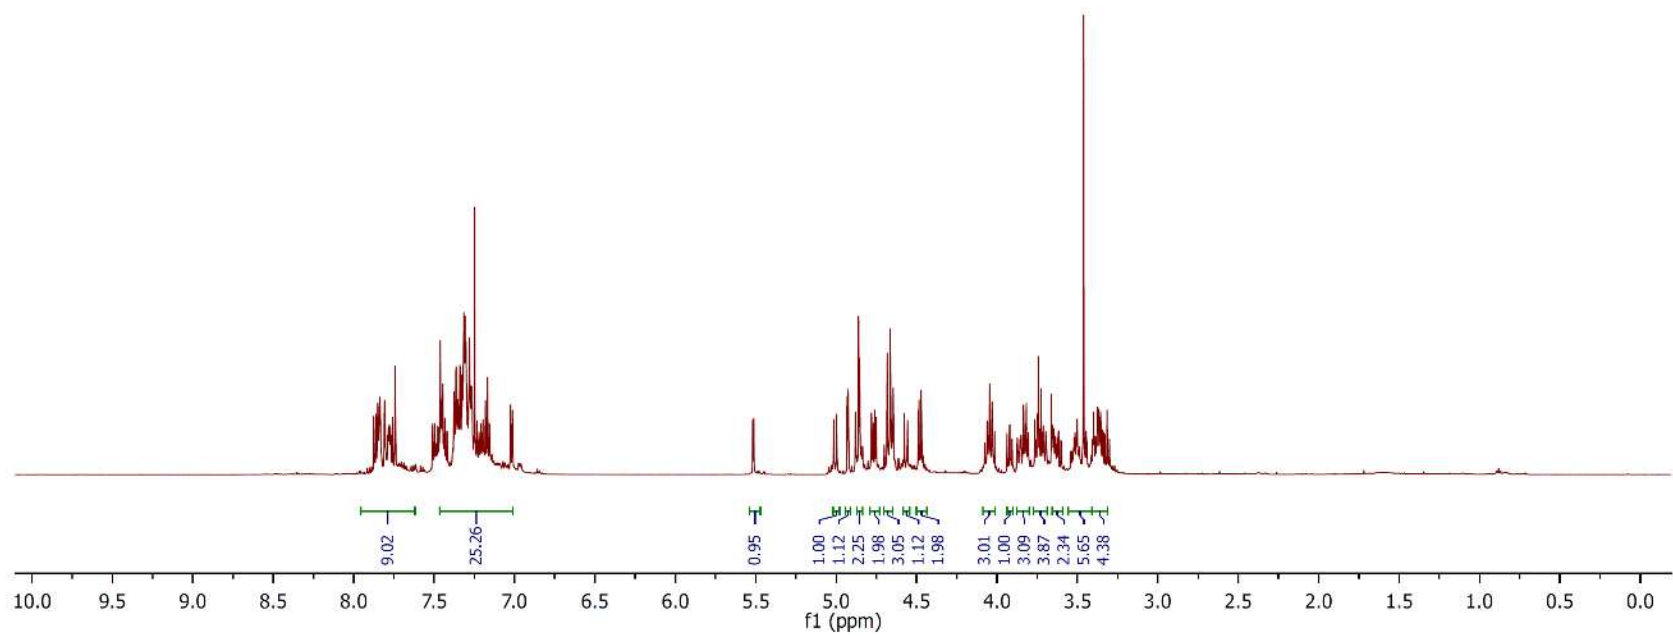

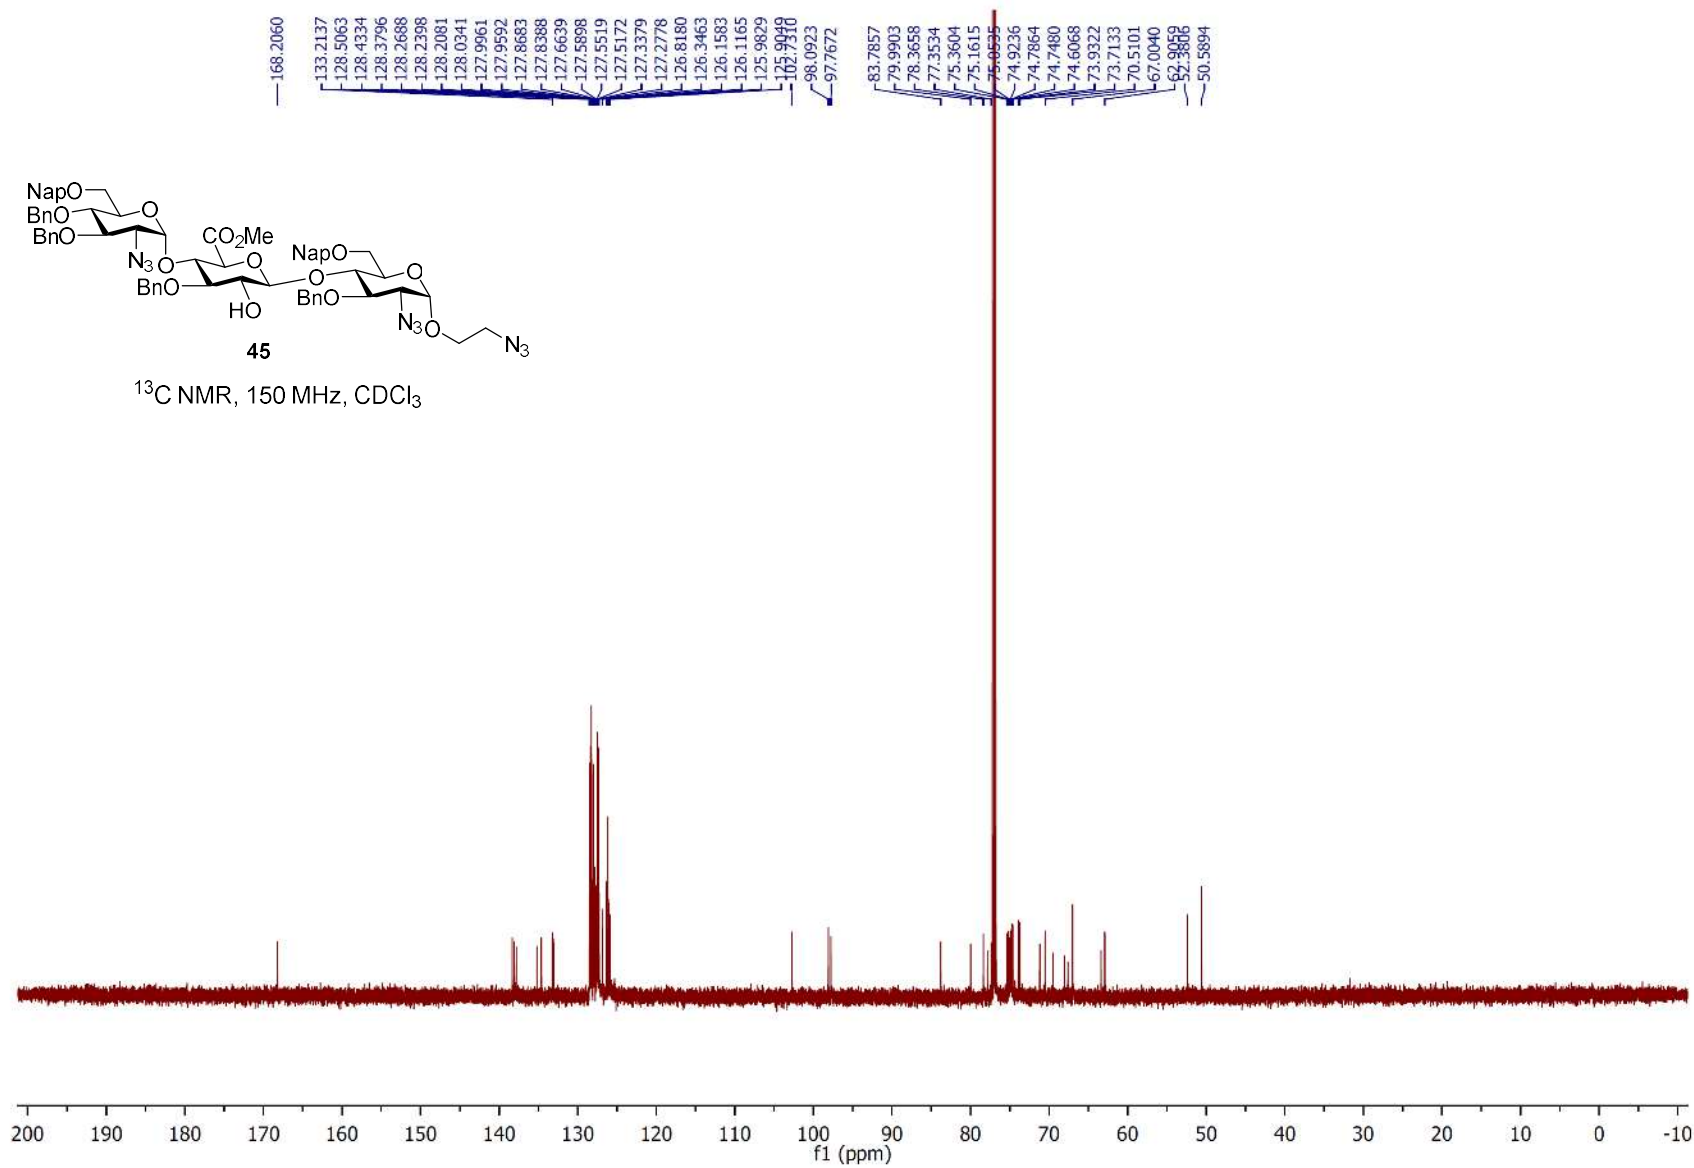

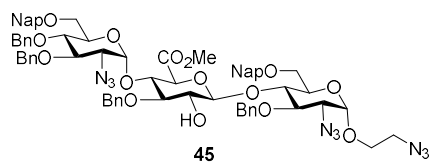

$^1\text{H}$ - $^{13}\text{C}$  HSQC, 600/150MHz,  $\text{CDCl}_3$

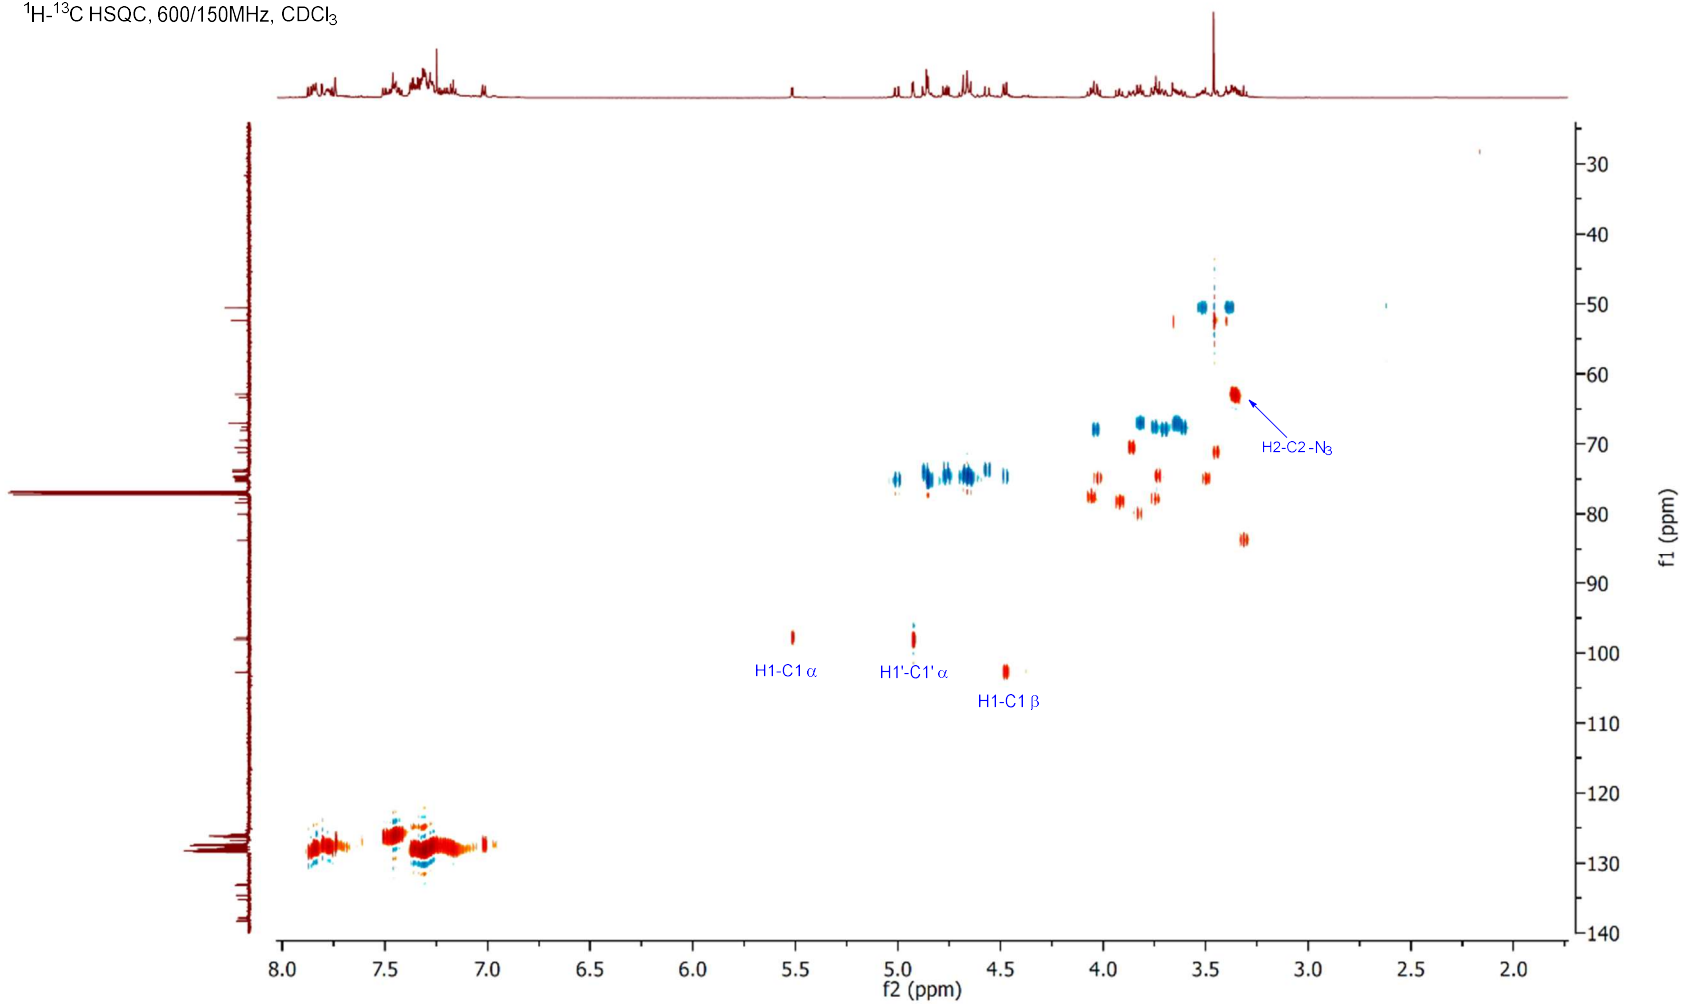

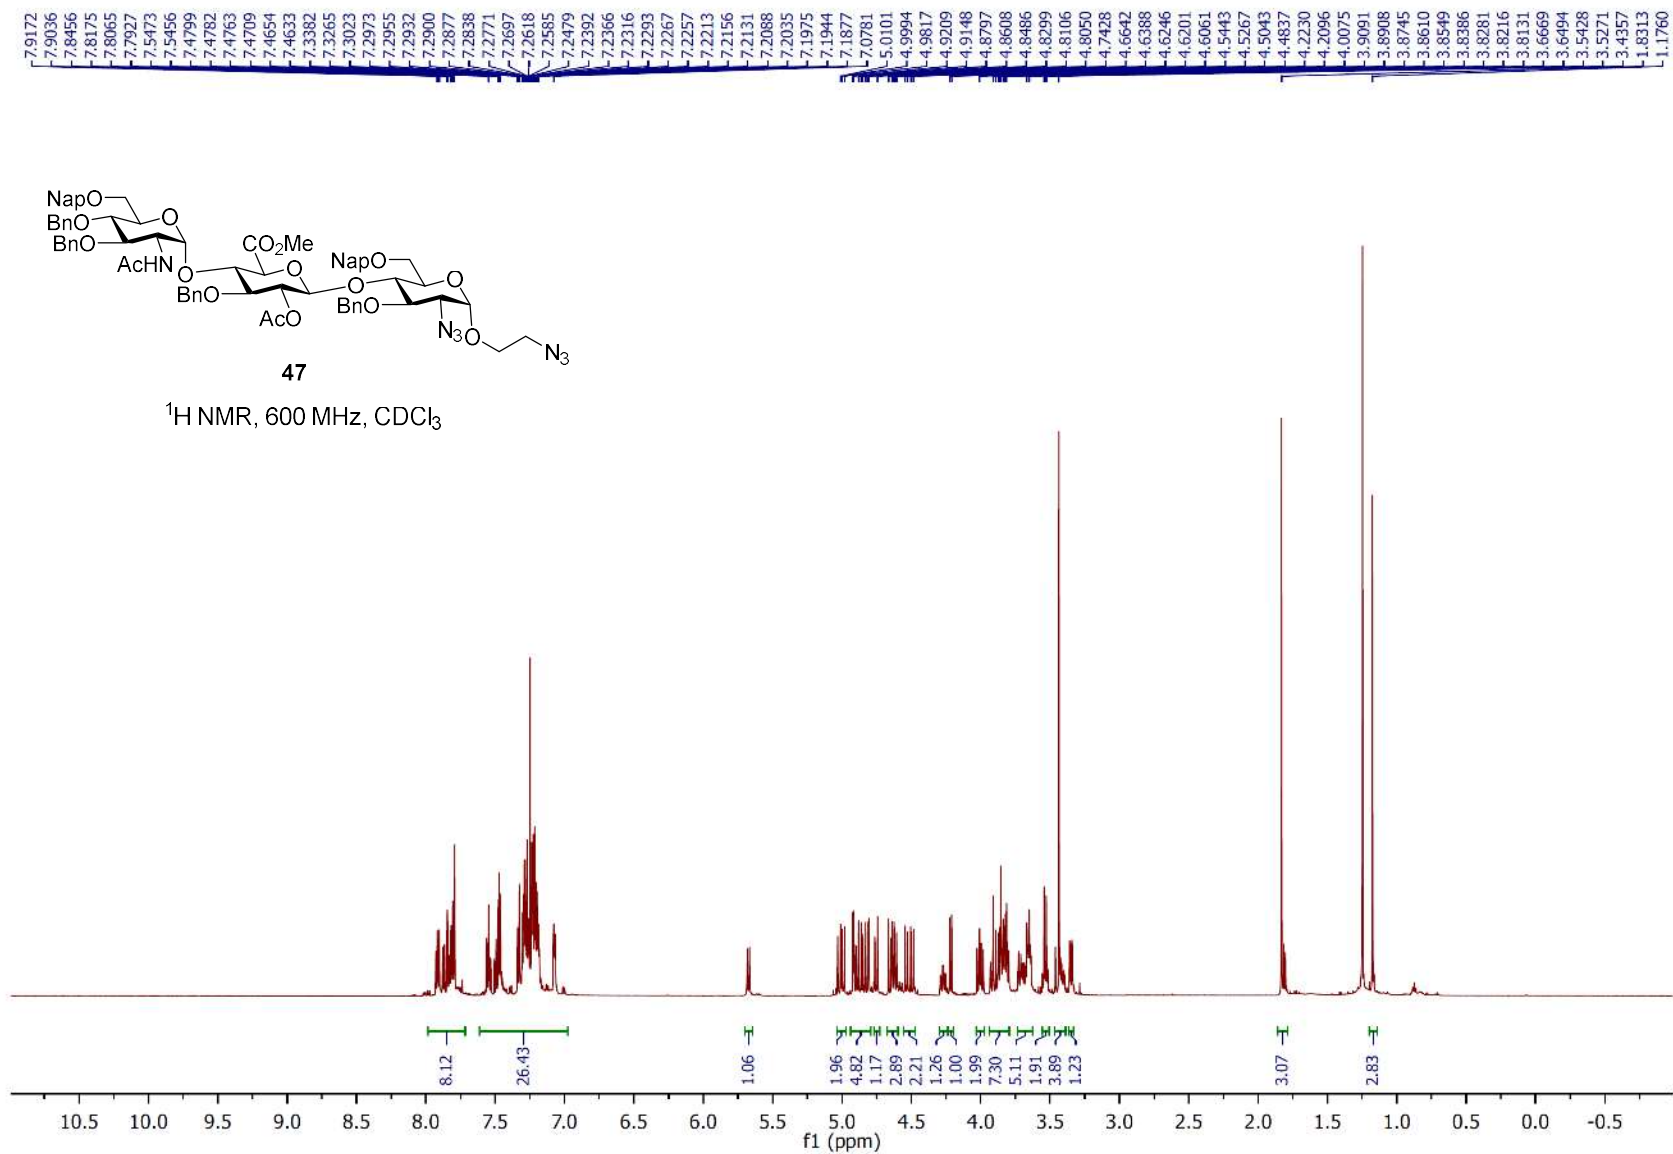

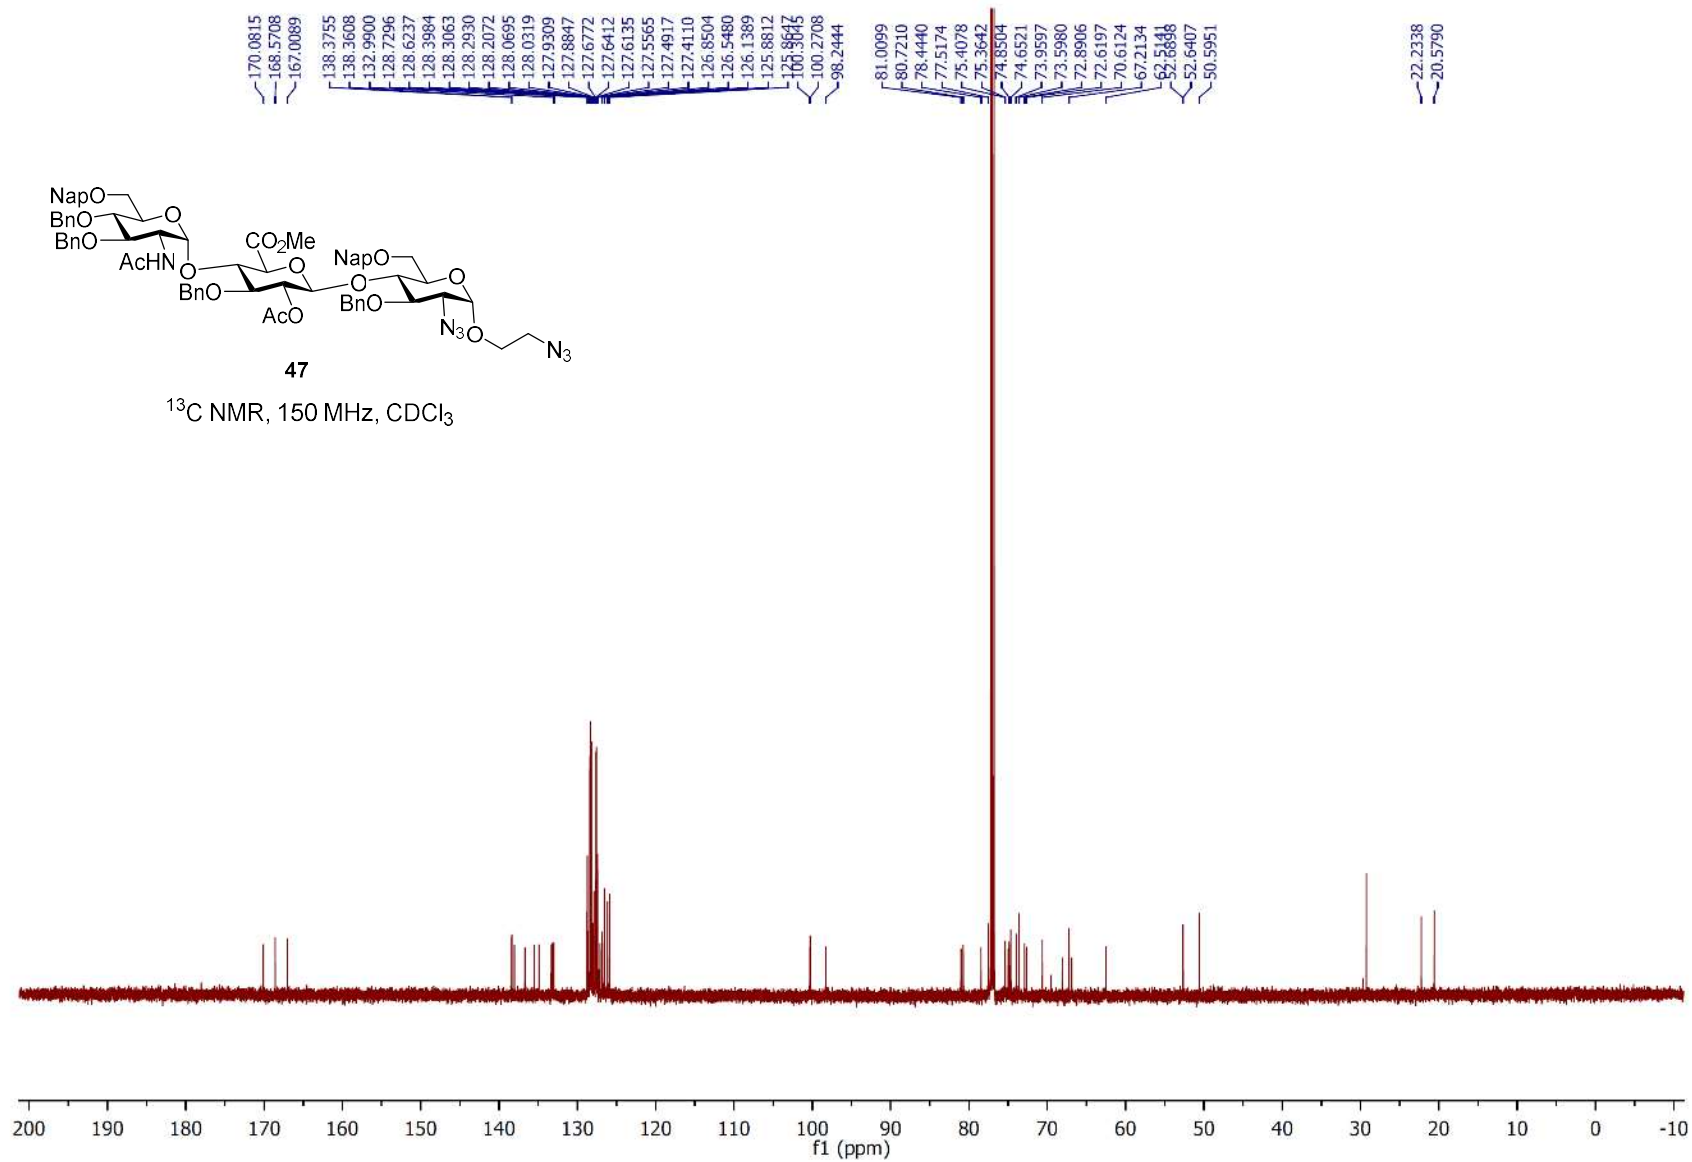

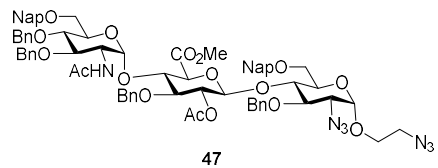

$^1\text{H}$ - $^{13}\text{C}$  HSQC, 600/150MHz,  $\text{CDCl}_3$

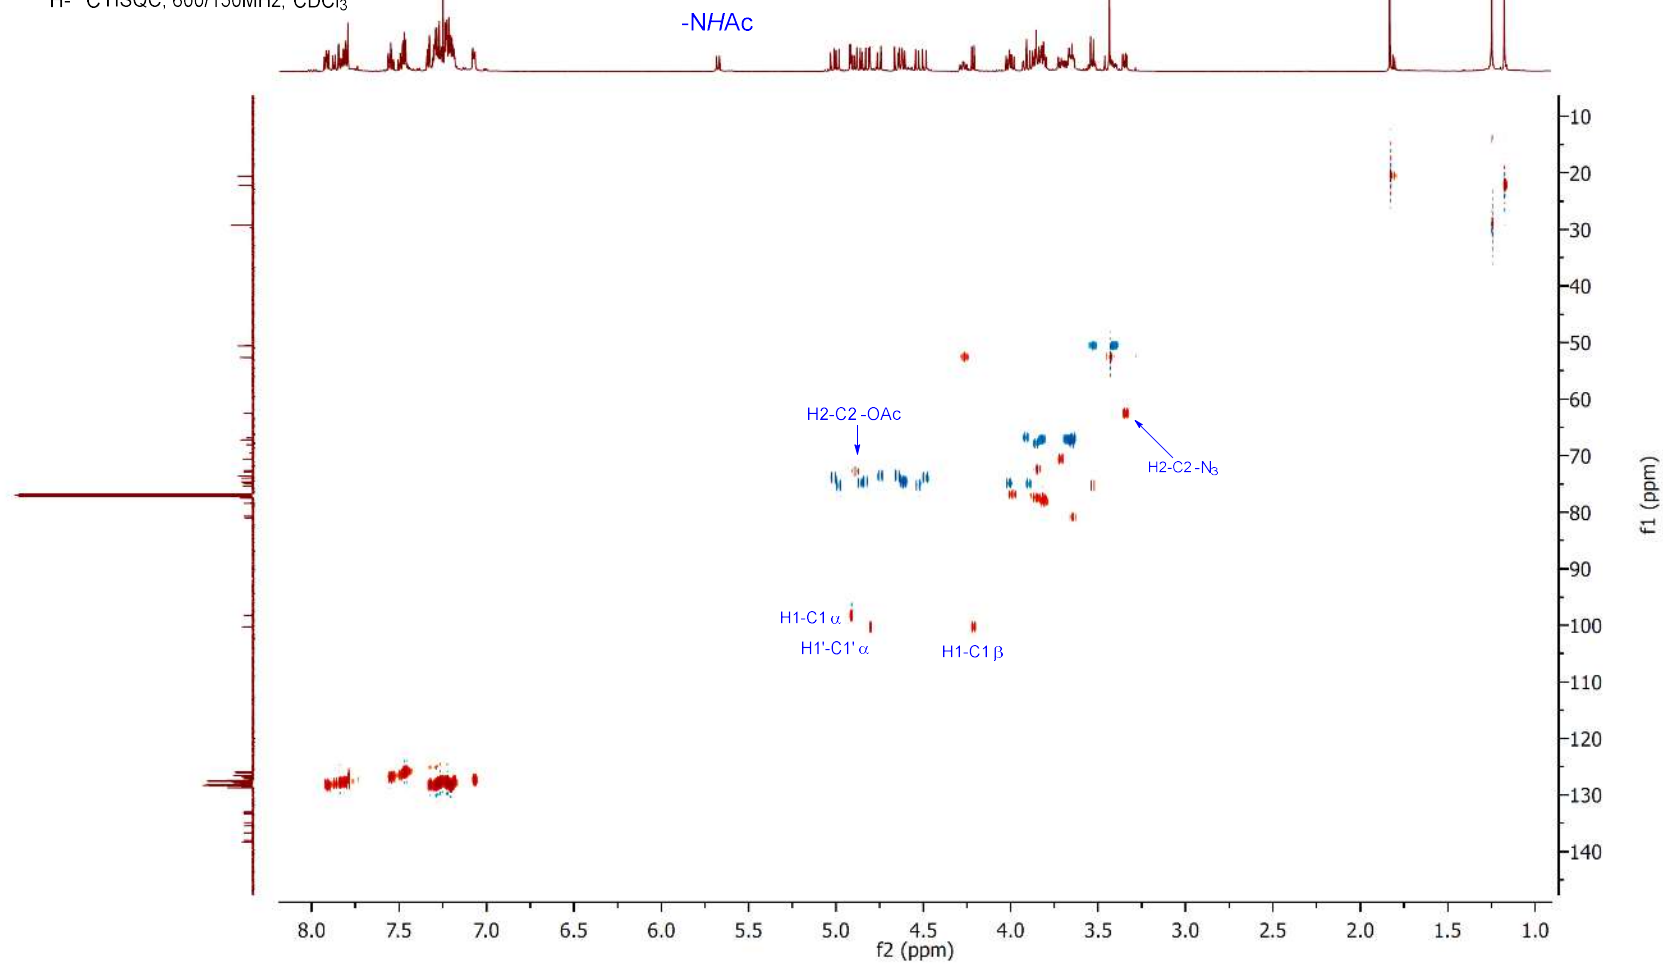



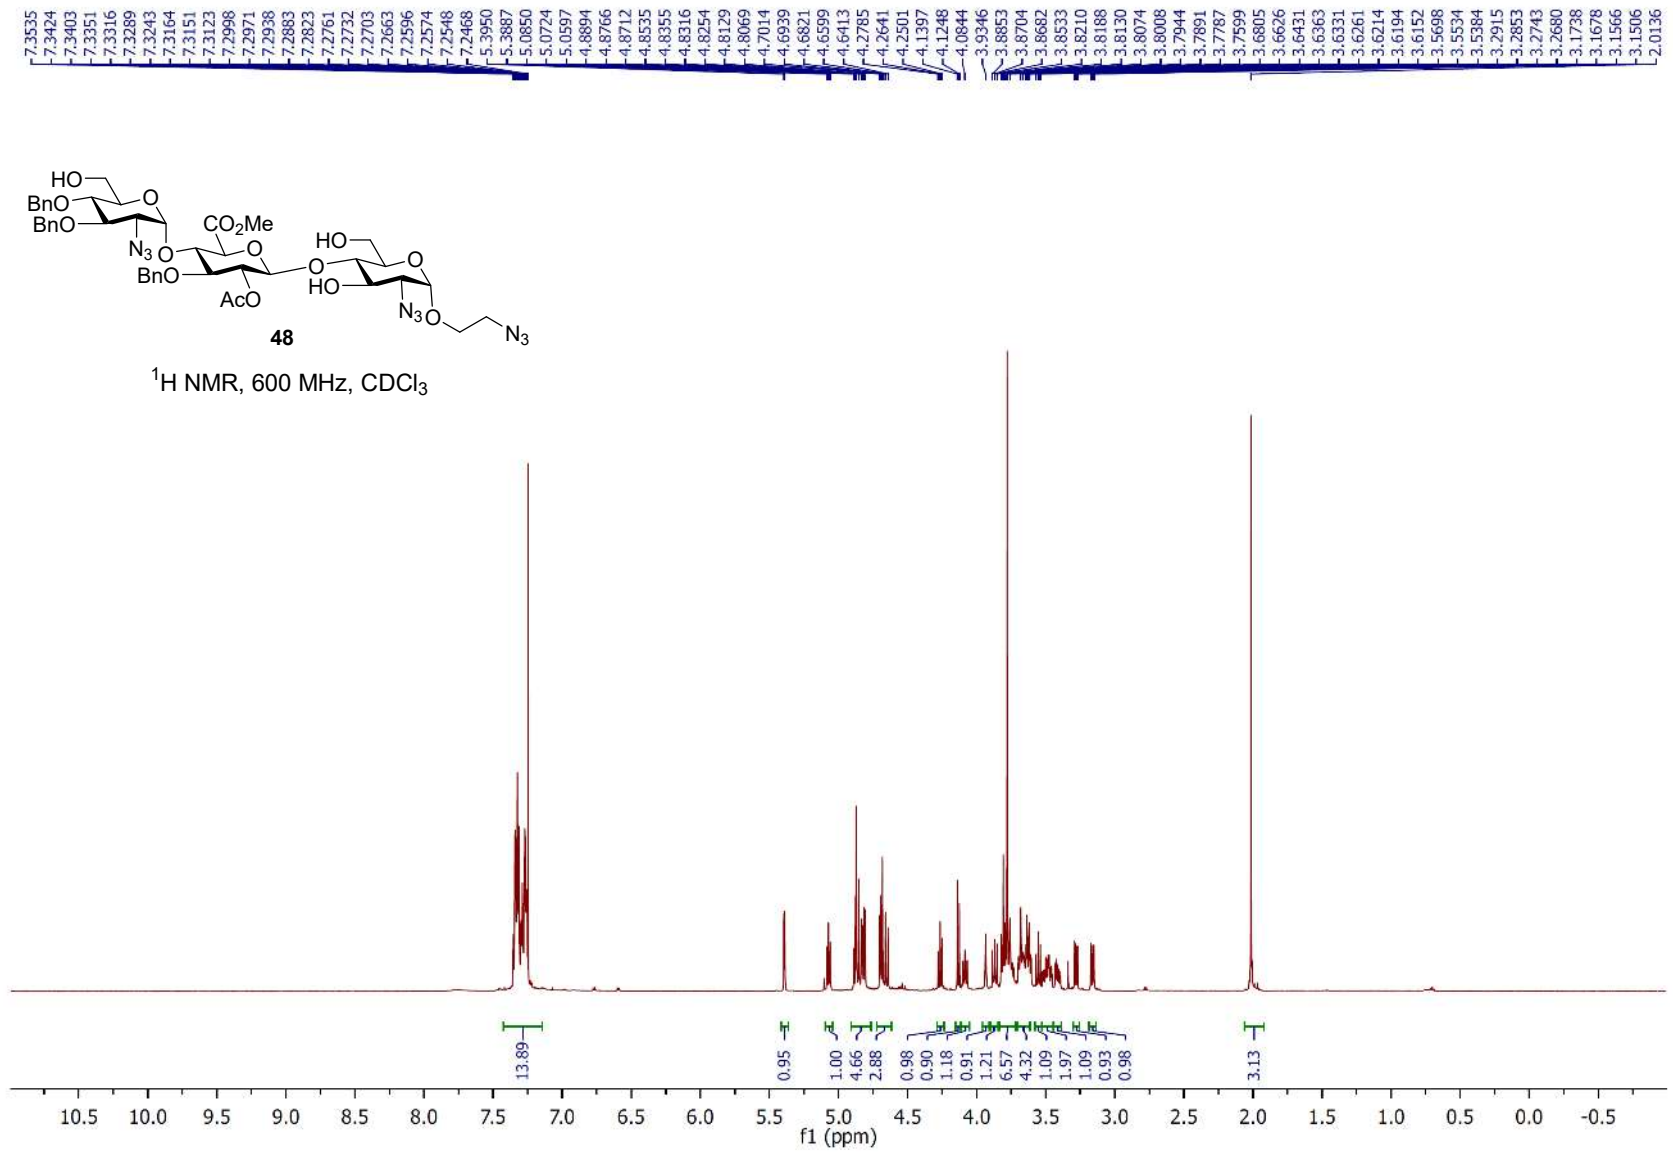

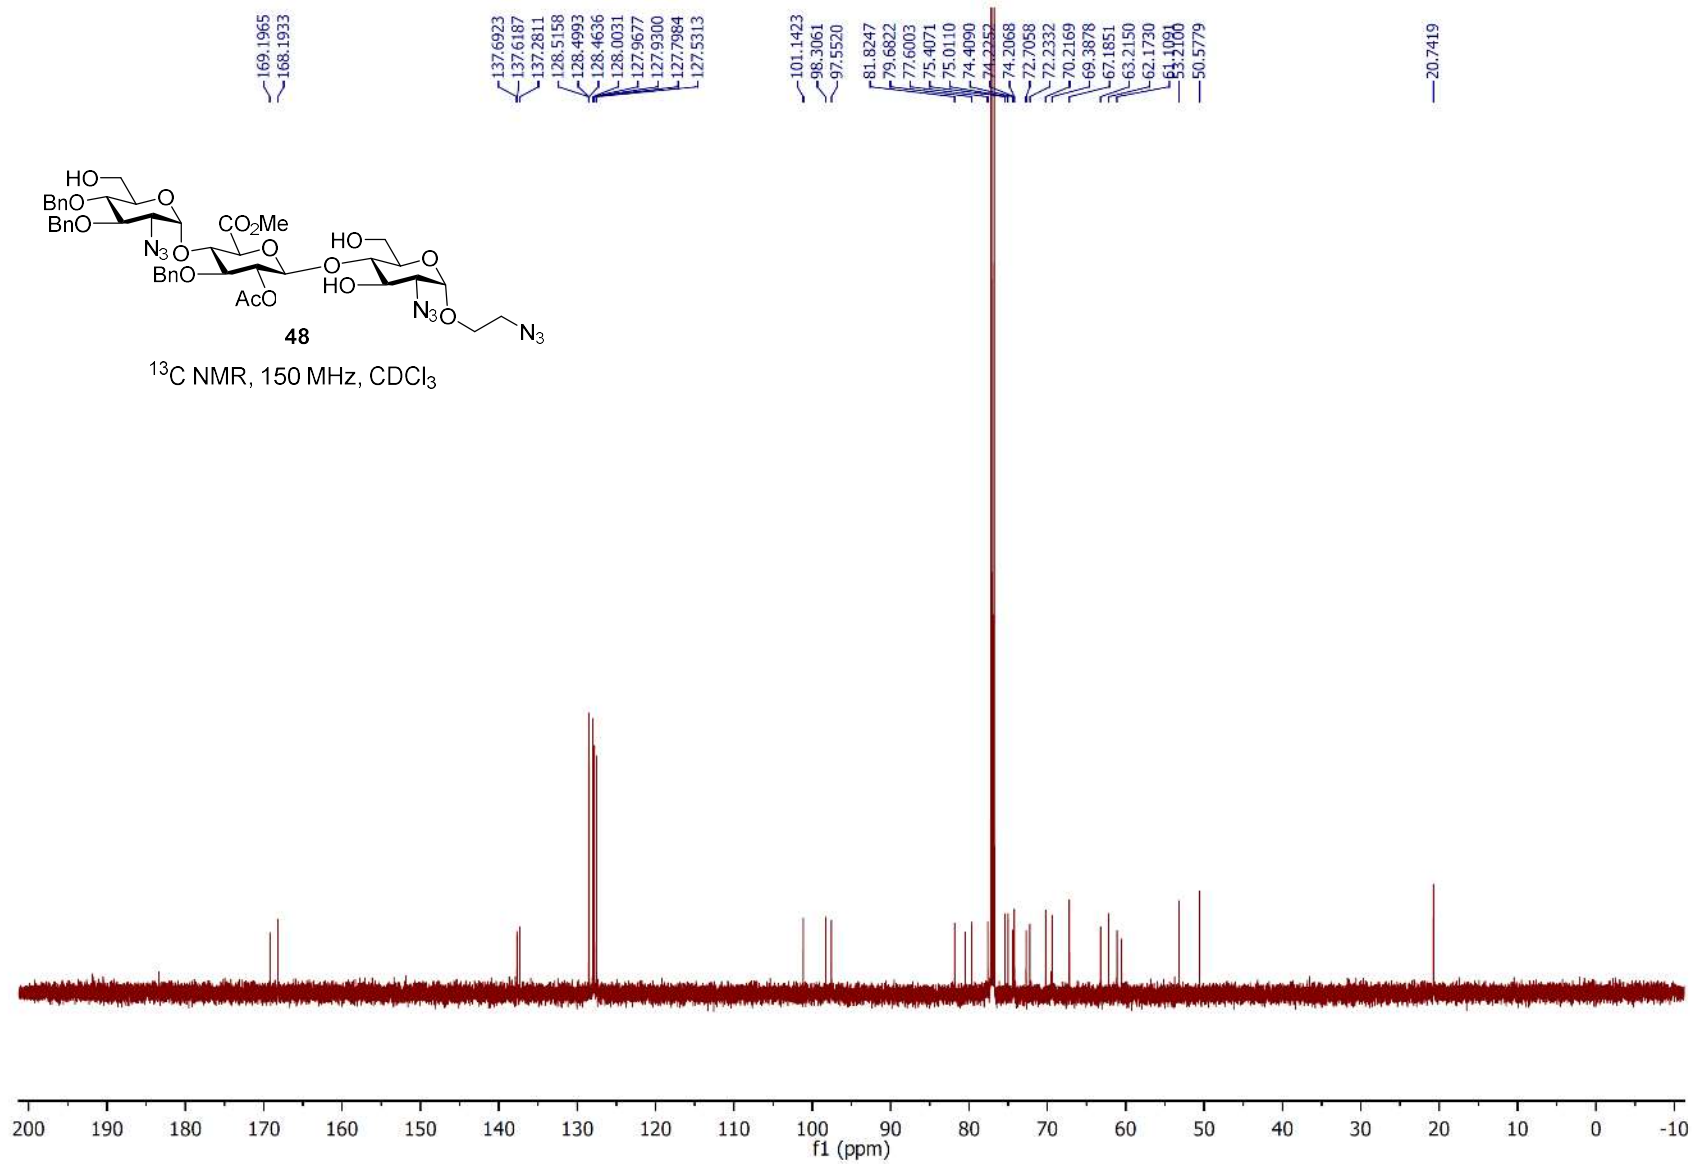

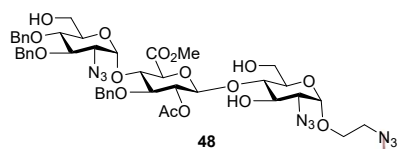

$^1\text{H}$ - $^{13}\text{C}$  HSQC, 600/150MHz,  $\text{CDCl}_3$

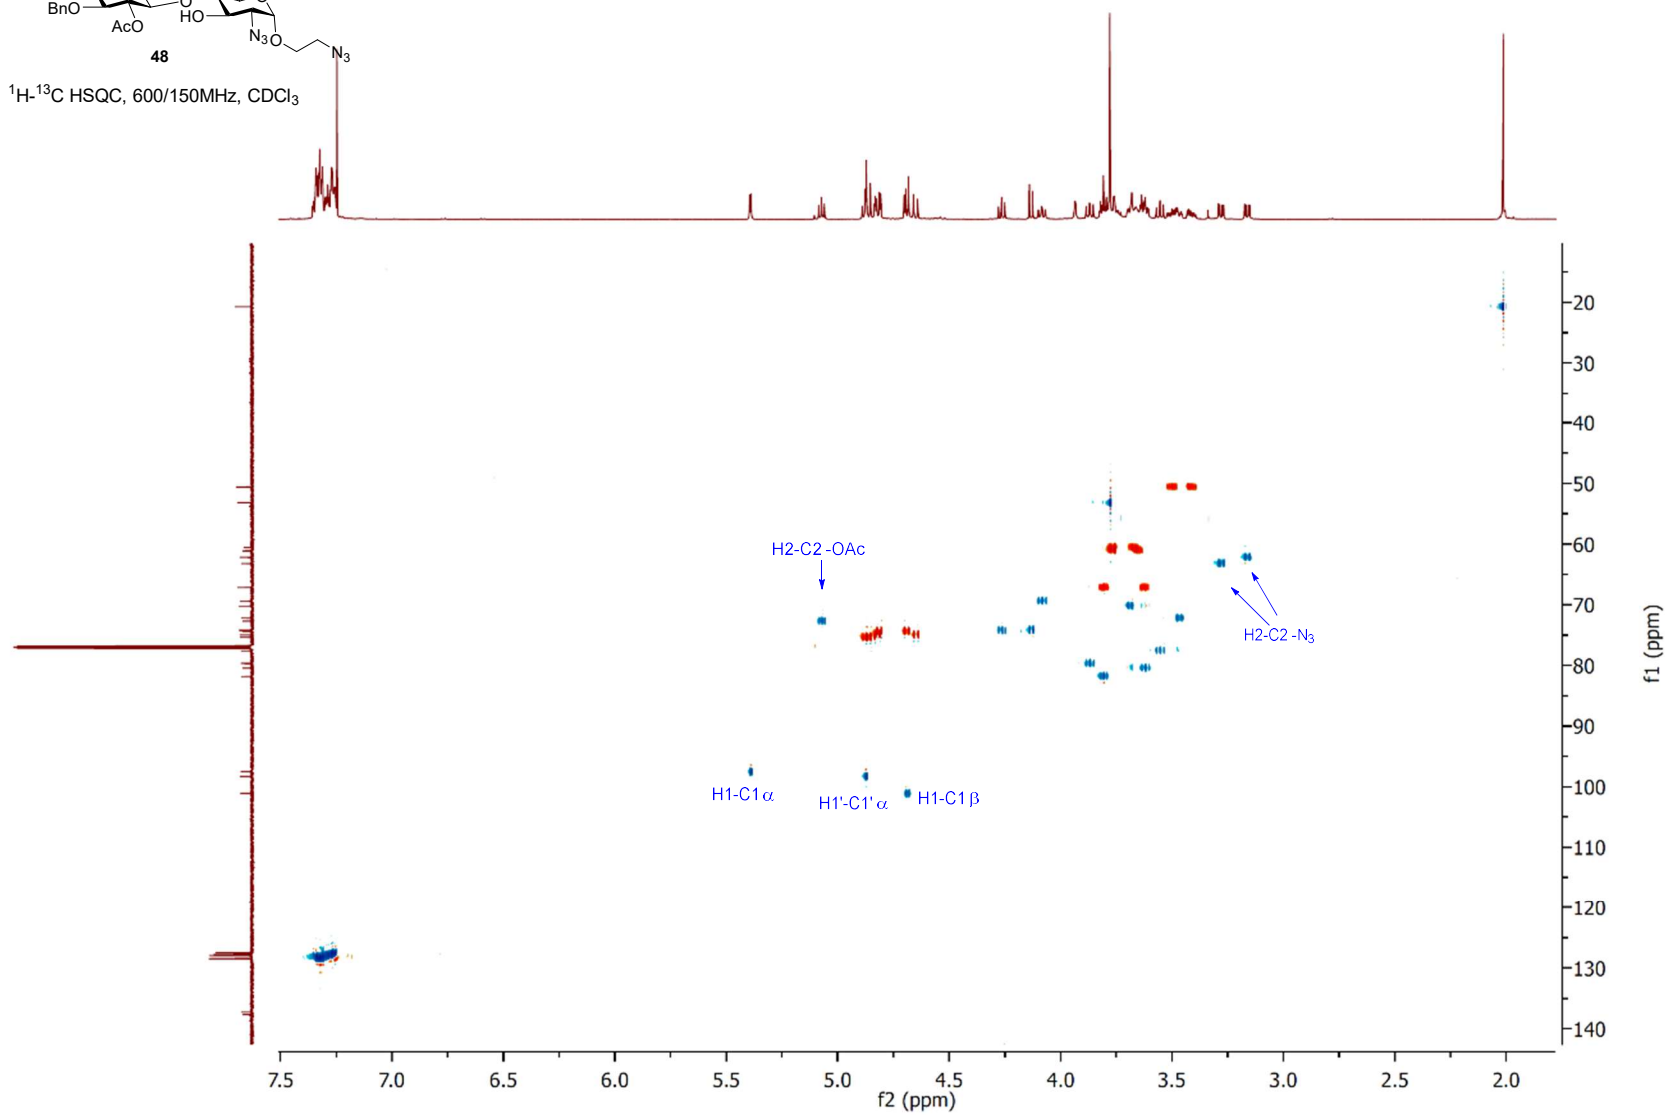

7.3999  
7.3978  
7.3861  
7.3289  
7.3252  
7.3166  
7.3151  
7.3138  
7.3105  
7.3040  
7.3007  
7.2893  
7.2867  
7.2789  
7.2776  
7.2734  
7.2711  
7.2673  
7.2641  
7.2603  
7.2583  
7.2555  
7.2528  
7.2473  
7.2438  
7.2406  
7.1417  
7.1382  
7.1287  
7.1261  
5.4207  
5.4146  
5.1388  
5.1254  
5.1242  
5.1108  
5.0927  
5.0745  
4.8764  
4.8704  
4.8441  
4.8312  
4.8242  
4.7765  
4.7632  
4.7434  
4.6947  
4.6766  
4.6596  
4.6414  
4.5972  
4.5771  
4.5181  
4.4997  
4.4420  
4.4219  
4.2533  
4.2388  
4.2242  
3.9743  
3.9592  
3.9149  
3.9039  
3.8986  
3.8935  
3.8338  
3.8218  
3.8168  
3.8113  
3.7972  
3.7826  
3.7500  
3.7332  
3.7138  
3.6544  
3.6306  
3.5962  
3.4871  
3.3284  
3.3222  
3.3111  
3.3049  
2.0015

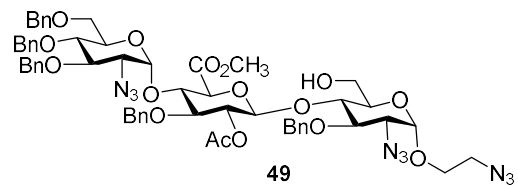

$^1\text{H}$  NMR, 600 MHz,  $\text{CDCl}_3$

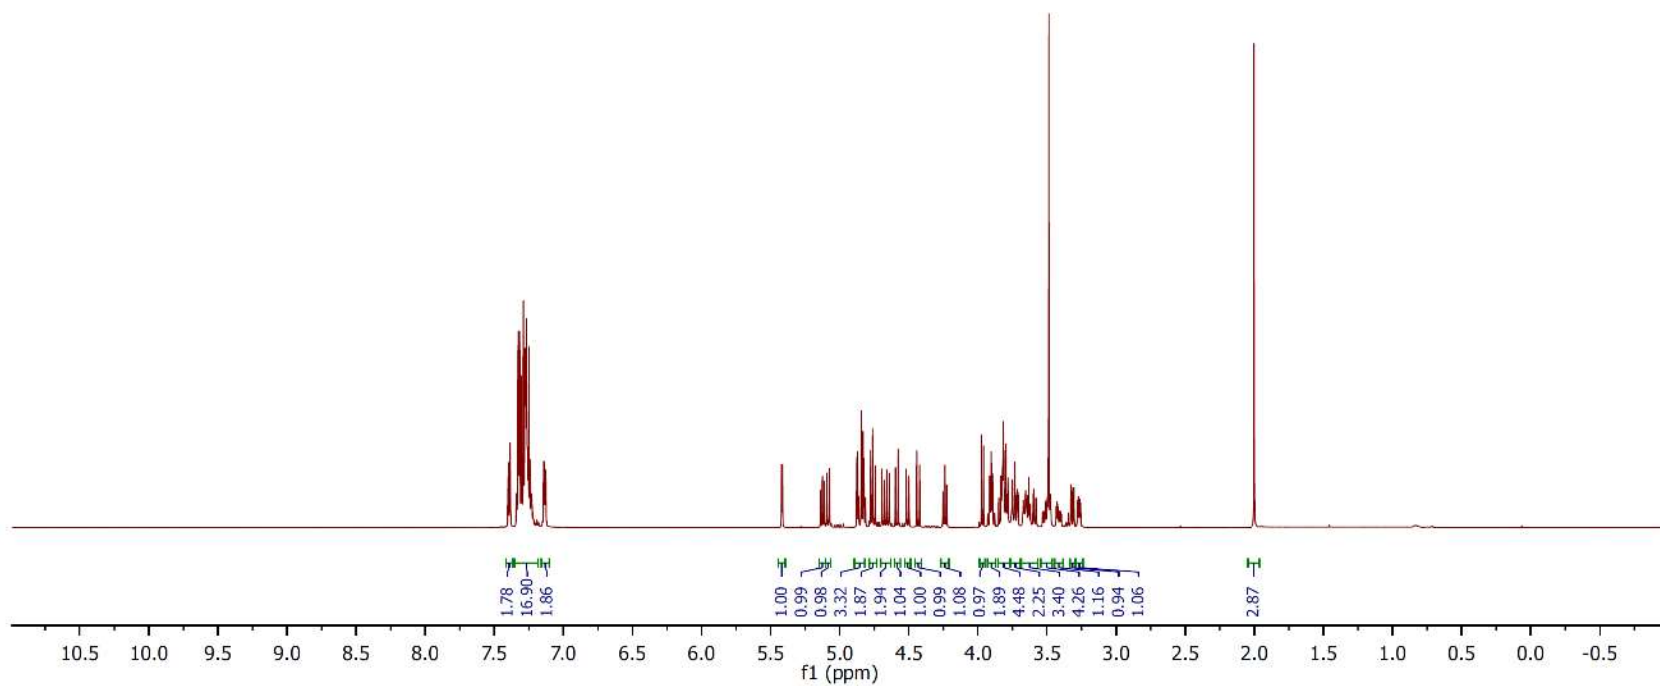

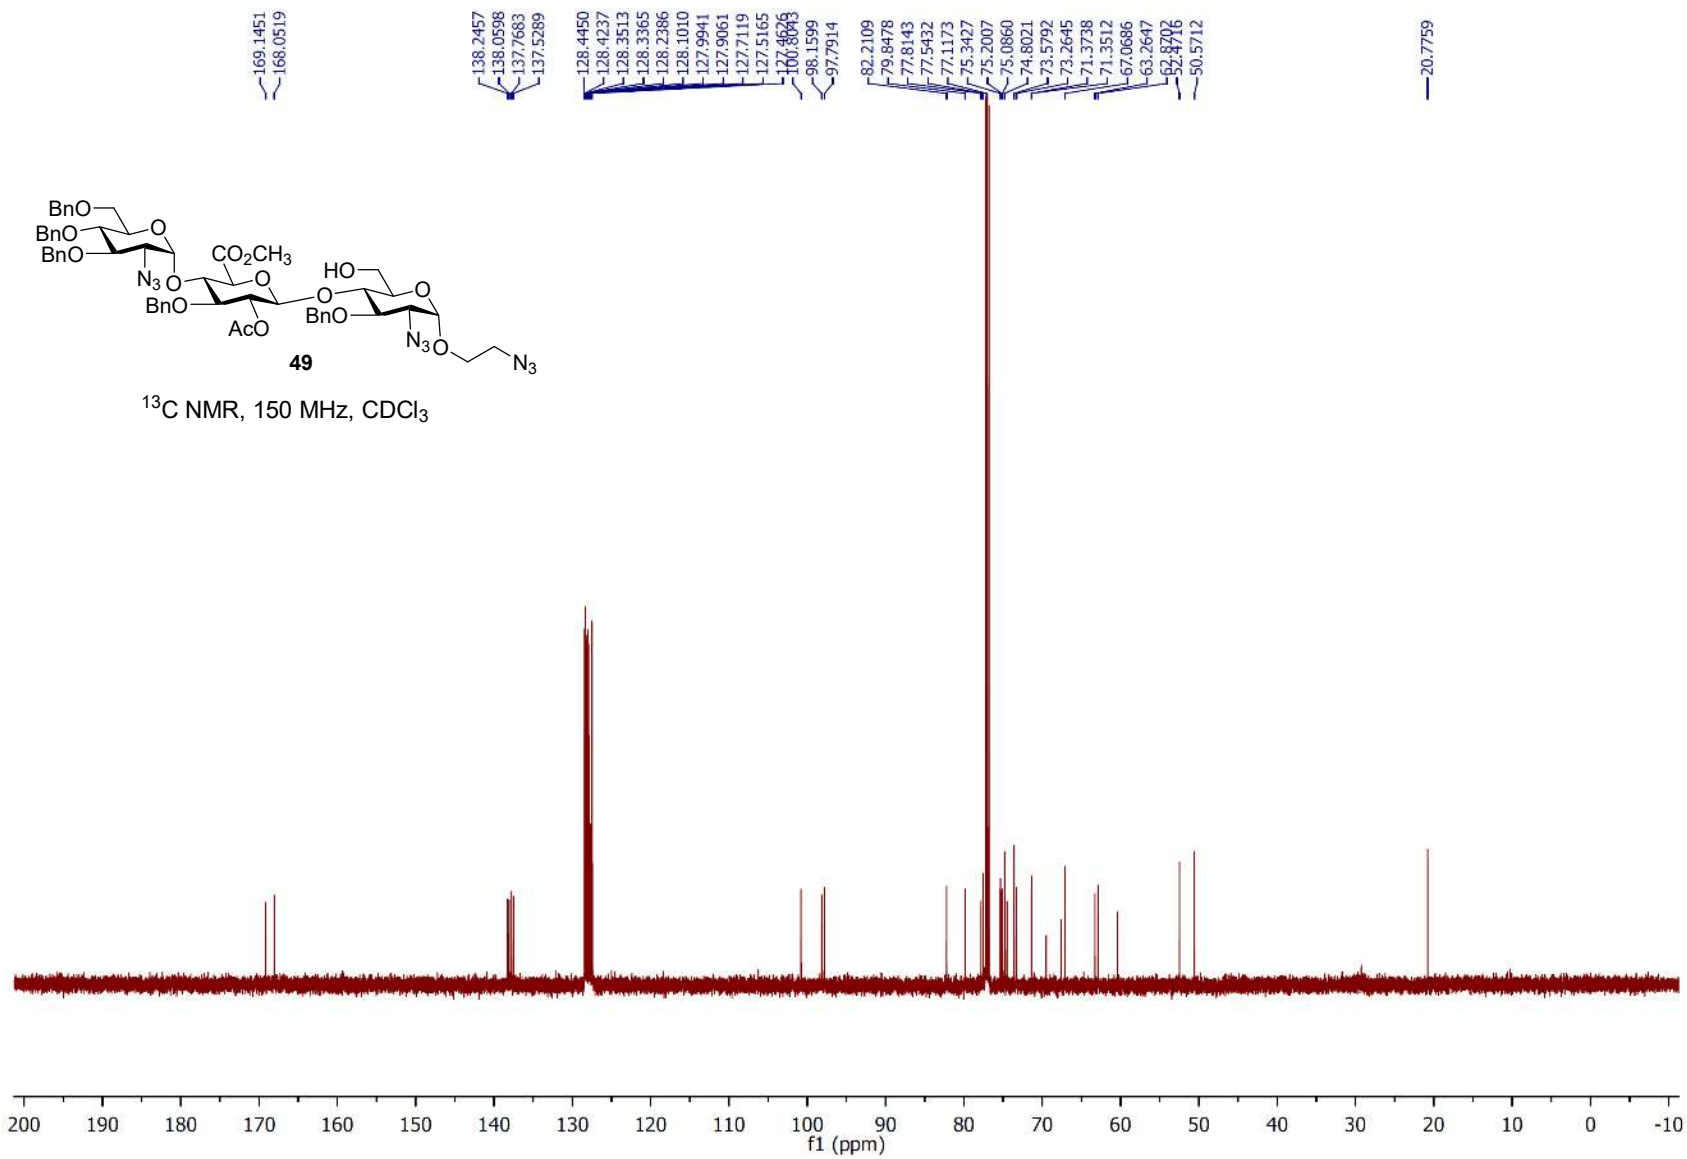

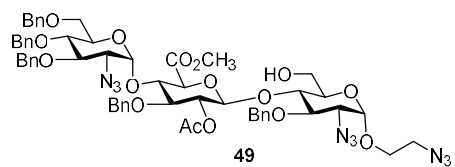

$^1\text{H}$ - $^{13}\text{C}$  HSQC, 600/150MHz,  $\text{CDCl}_3$

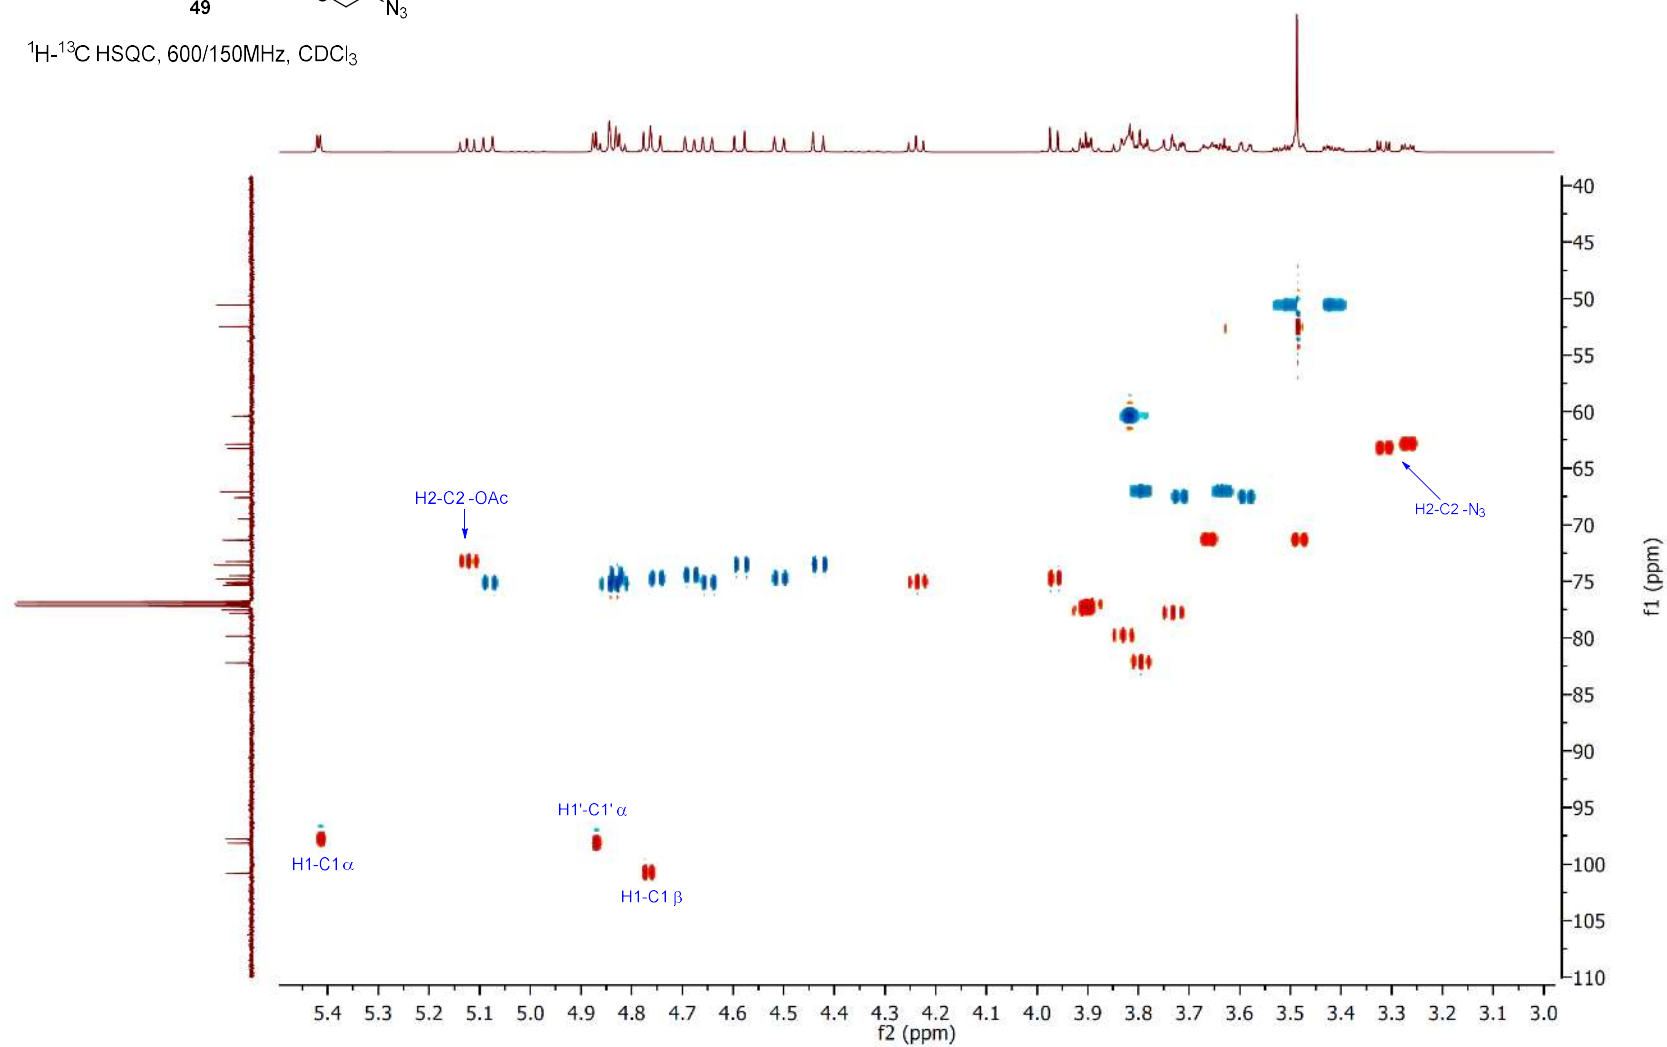

7.3758  
7.3637  
7.3475  
7.3339  
7.3237  
7.3118  
7.3020  
7.2908  
7.2870  
7.2791  
7.2747  
7.2596  
7.2550  
7.2478  
7.2426  
7.2329  
7.2273  
7.2240  
7.2144  
5.7358  
5.7199  
5.1399  
5.1261  
5.1123  
5.0755  
5.0575  
4.9097  
4.9037  
4.8719  
4.8659  
4.8310  
4.8126  
4.8029  
4.7898  
4.7833  
4.6582  
4.6397  
4.6345  
4.6160  
4.6013  
4.5822  
4.5286  
4.5103  
4.2080  
4.2022  
4.0934  
4.0794  
4.0655  
3.9666  
3.9526  
3.9017  
3.8948  
3.8864  
3.7996  
3.7924  
3.7865  
3.7809  
3.7742  
3.7681  
3.7479  
3.6690  
3.6548  
3.6438  
3.6358  
3.6295  
3.6256  
3.6207  
3.6035  
3.5623  
3.5470  
3.5371  
3.5264  
3.5095  
3.5041  
3.4974  
3.4155  
3.4097  
3.4061  
3.3382  
3.2804  
3.2709  
1.9644  
1.4405

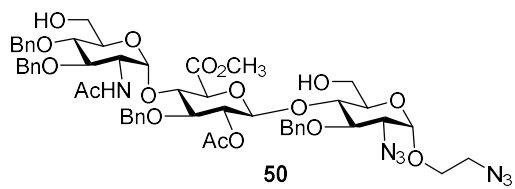

<sup>1</sup>H NMR, 600 MHz, CDCl<sub>3</sub>

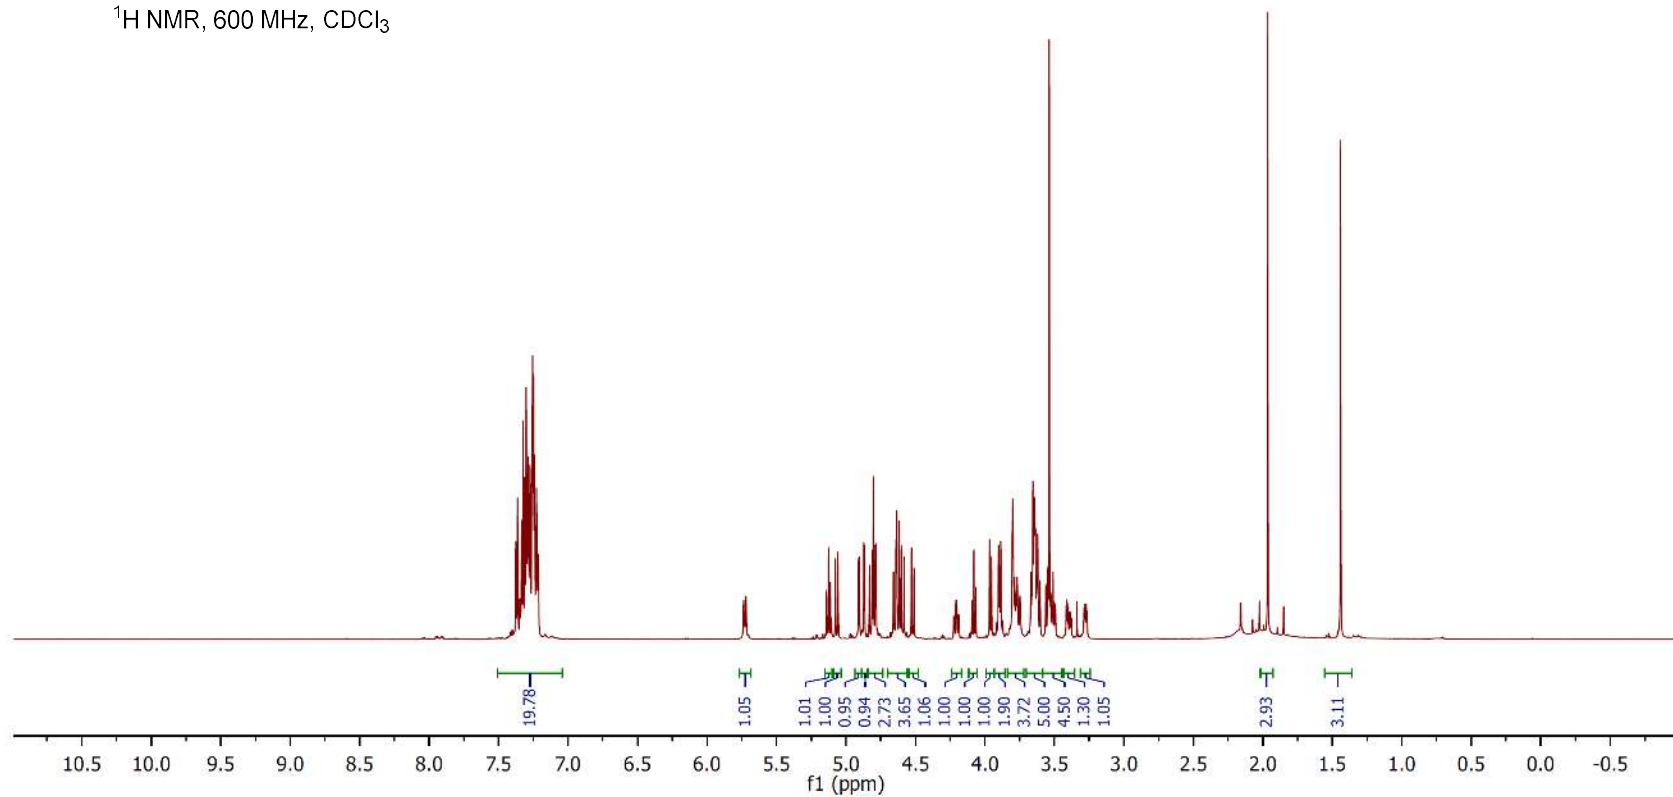

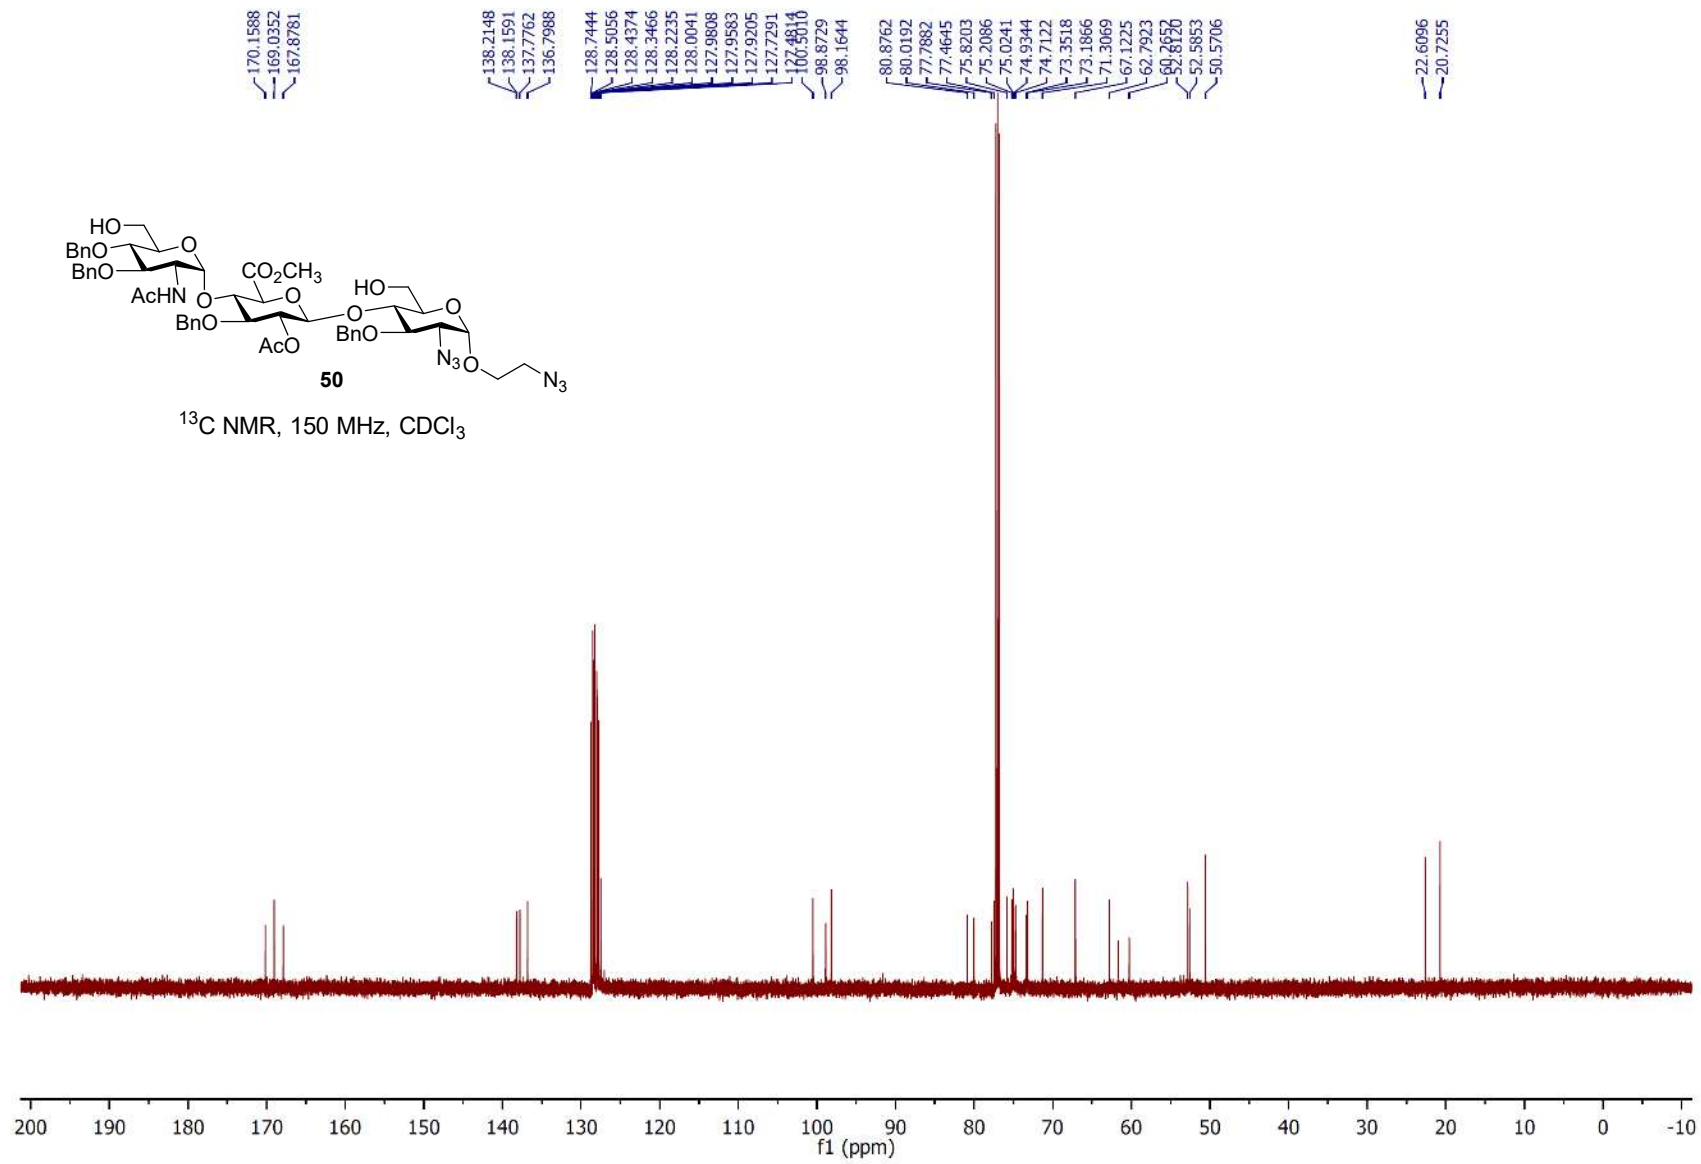



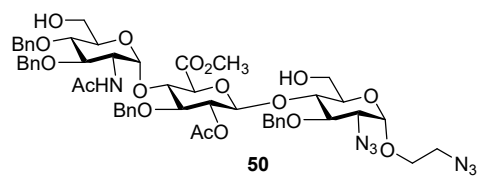

$^1\text{H}$ - $^{13}\text{C}$  HSQC, 600/150MHz,  $\text{CDCl}_3$

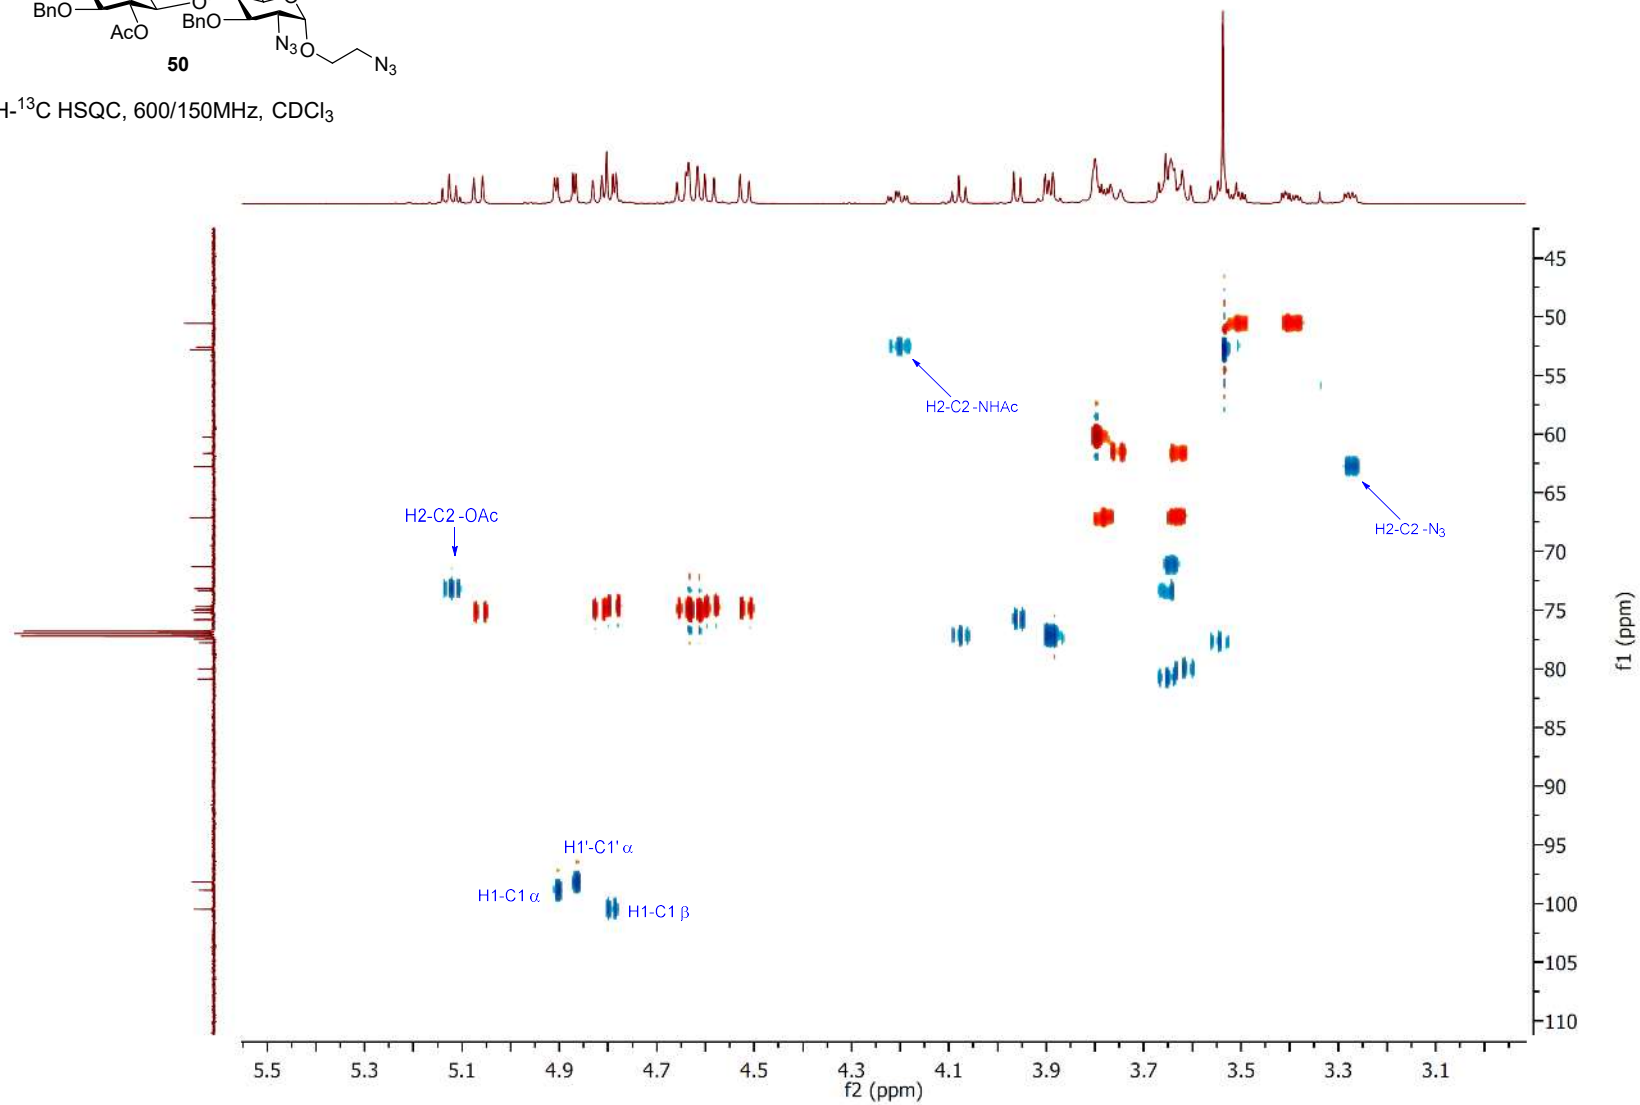

7.3832  
7.3713  
7.3626  
7.3589  
7.3511  
7.3491  
7.3391  
7.3257  
7.3230  
7.3134  
7.3045  
7.3020  
7.2919  
7.2854  
7.2713  
7.2614  
7.2578  
7.2537  
7.2516  
7.2480  
7.2400  
5.3652  
5.3588  
5.1101  
5.0856  
5.0493  
5.0673  
4.8850  
4.8790  
4.8704  
4.8645  
4.8339  
4.8151  
4.7536  
4.7491  
4.7348  
4.7170  
4.7133  
4.7033  
4.6979  
4.6940  
4.6851  
4.6780  
4.6670  
4.6438  
4.6258  
4.2084  
3.9659  
3.9546  
3.9508  
3.9398  
3.9272  
3.9236  
3.9146  
3.9013  
3.8909  
3.8852  
3.8090  
3.8053  
3.8034  
3.7969  
3.7890  
3.7850  
3.7792  
3.7740  
3.7340  
3.7177  
3.6614  
3.6411  
3.6349  
3.6302  
3.6272  
3.6243  
3.5486  
3.5445  
3.5314  
3.5136  
3.4138  
3.4093  
3.3966  
3.3919  
1.9847

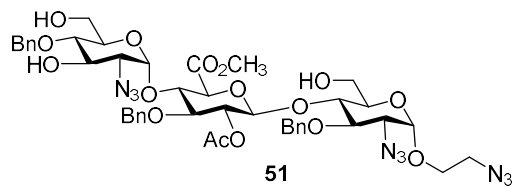

$^1\text{H NMR}$ , 600 MHz,  $\text{CDCl}_3$

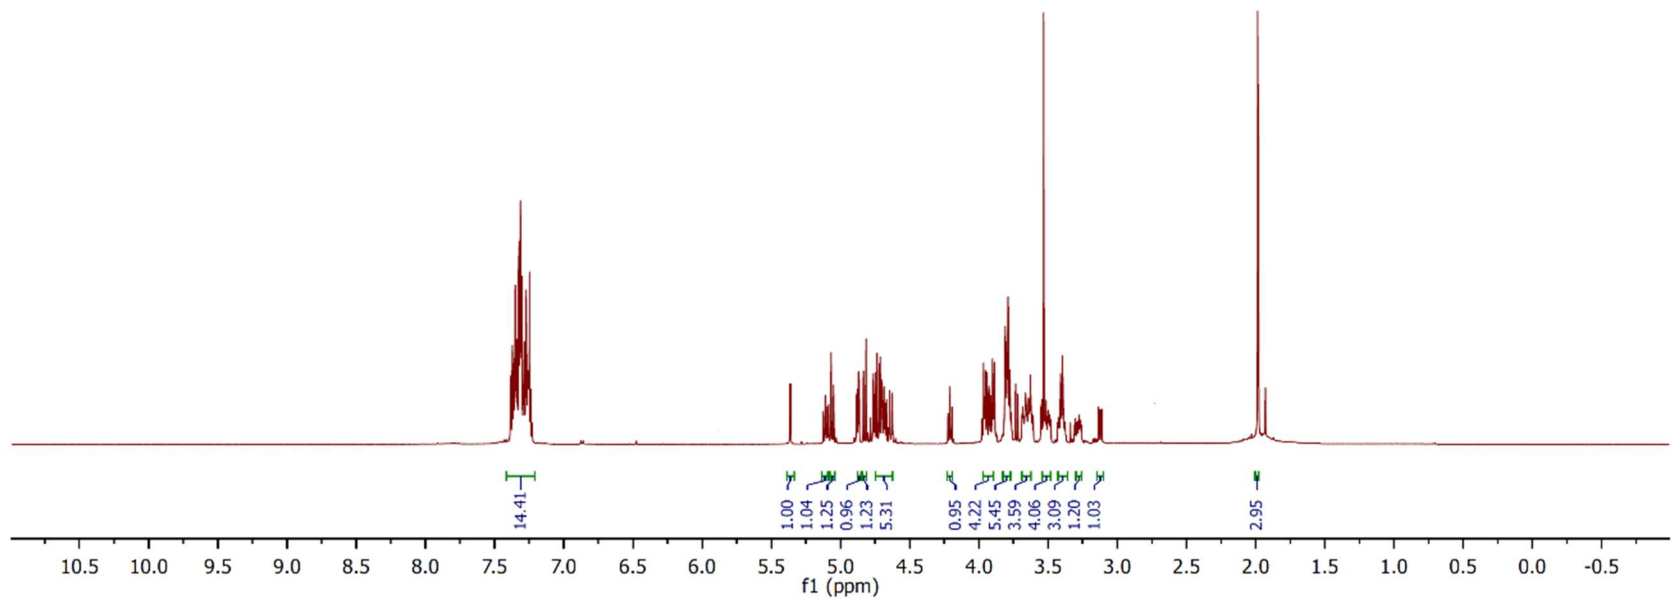

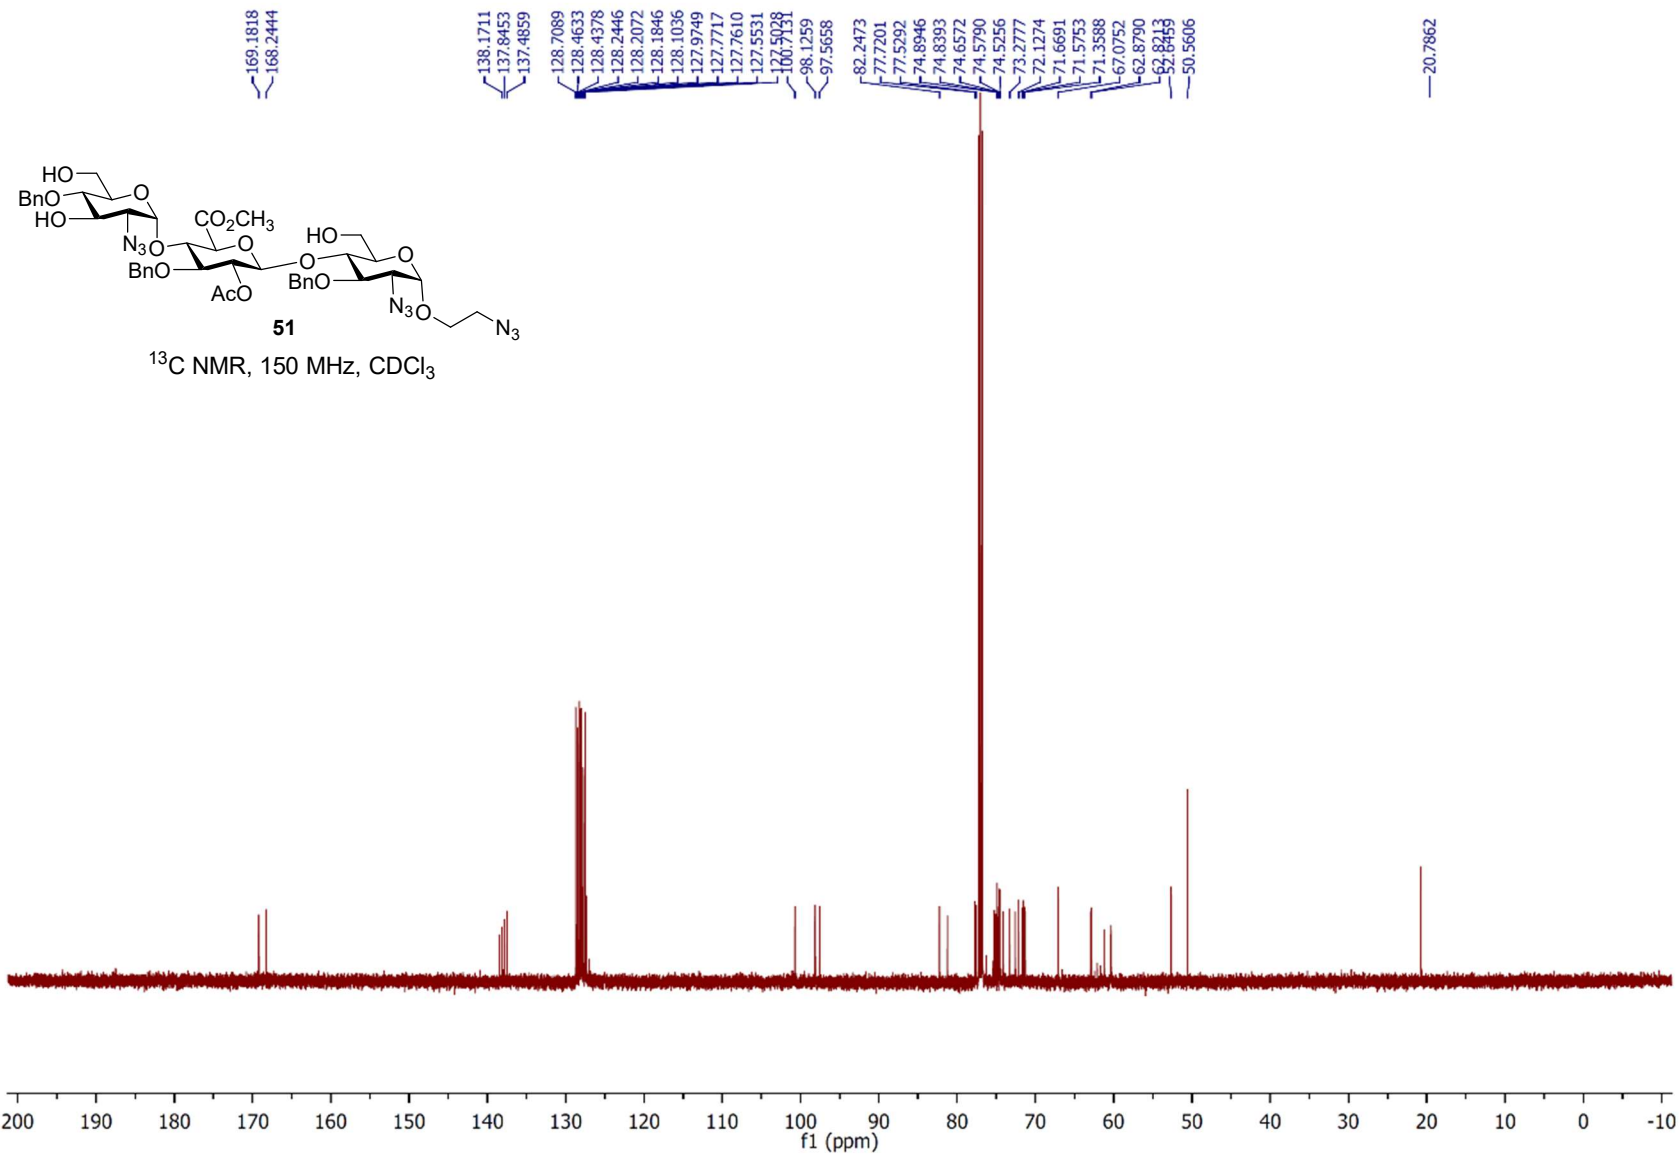

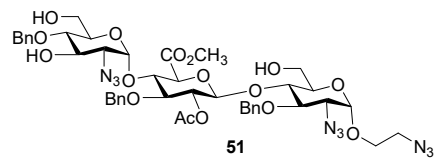

$^1\text{H}$ - $^{13}\text{C}$  HSQC, 600/150MHz,  $\text{CDCl}_3$

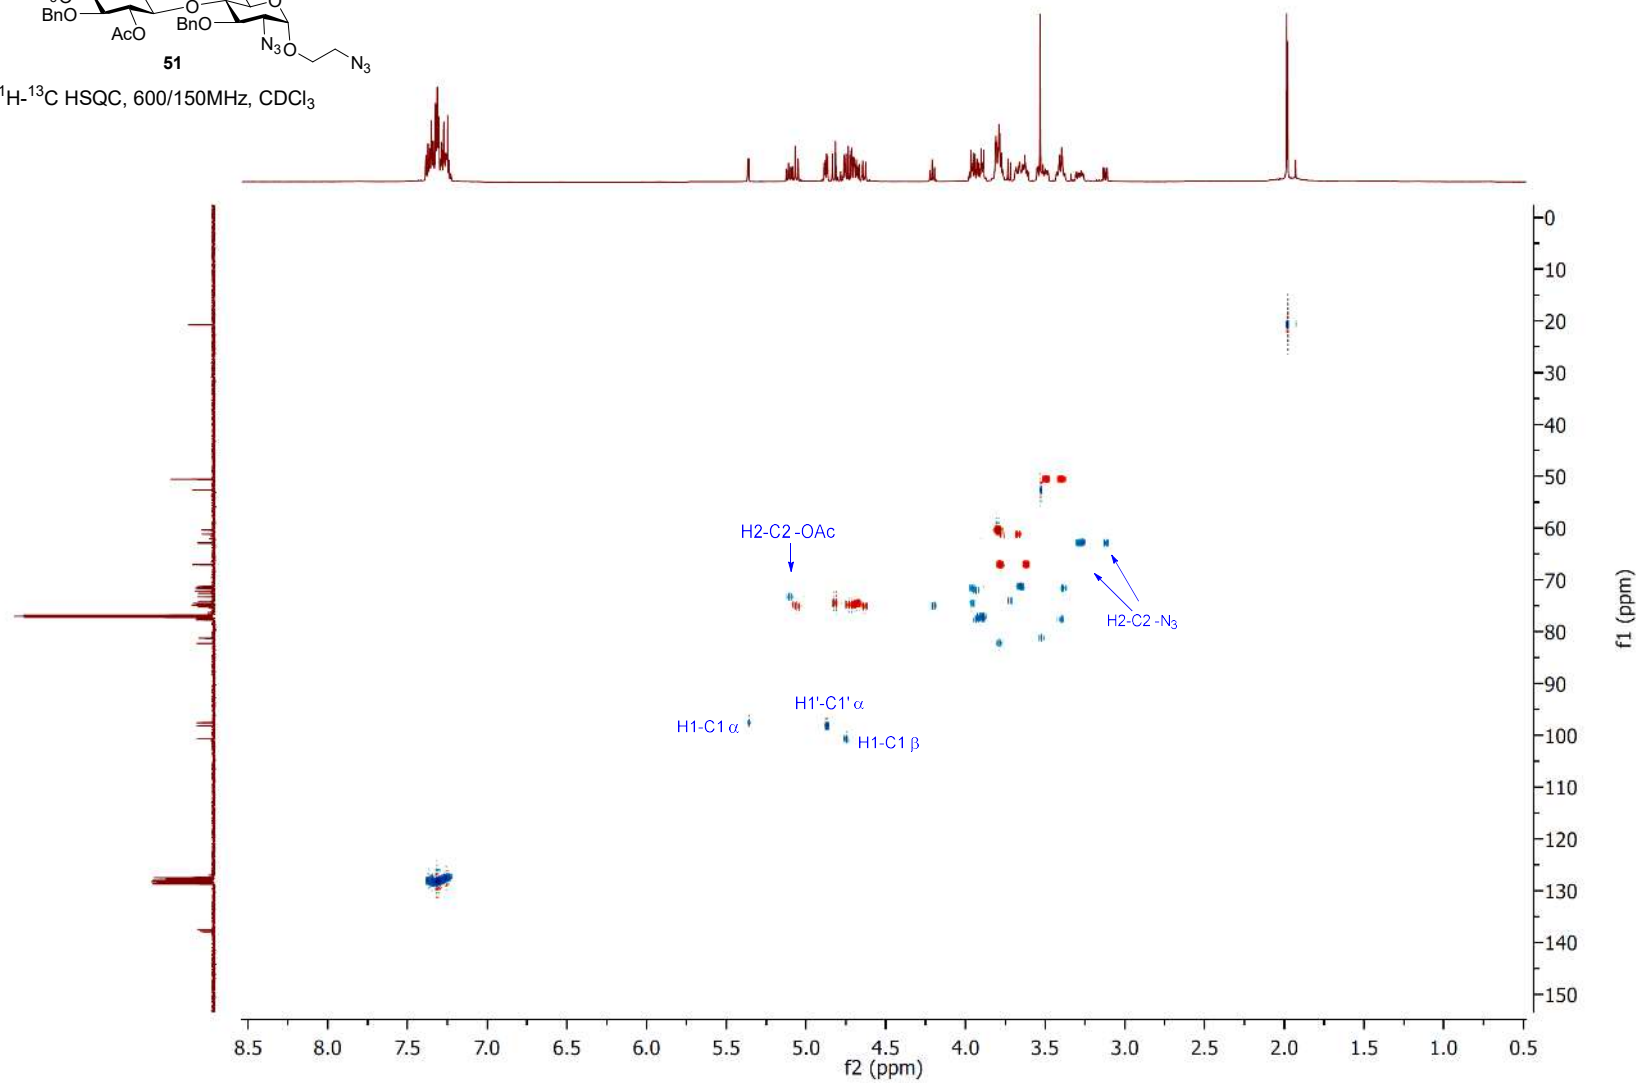

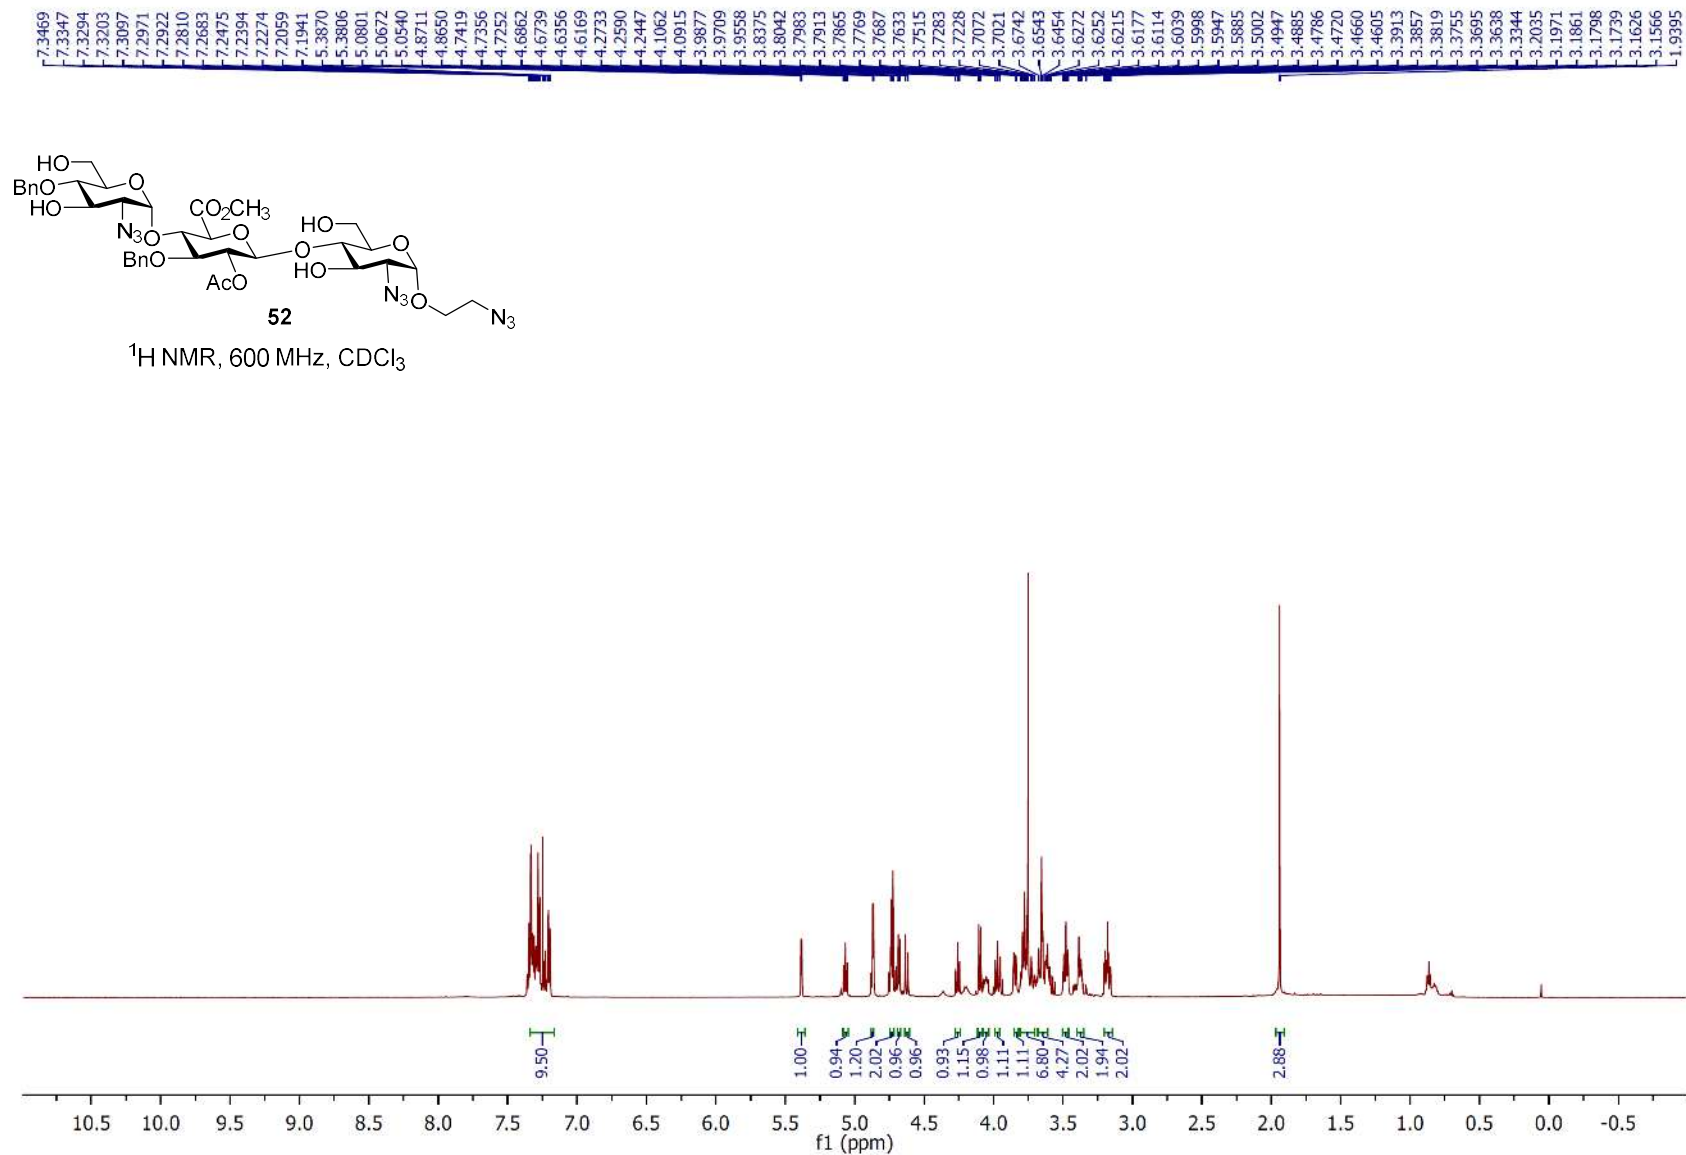

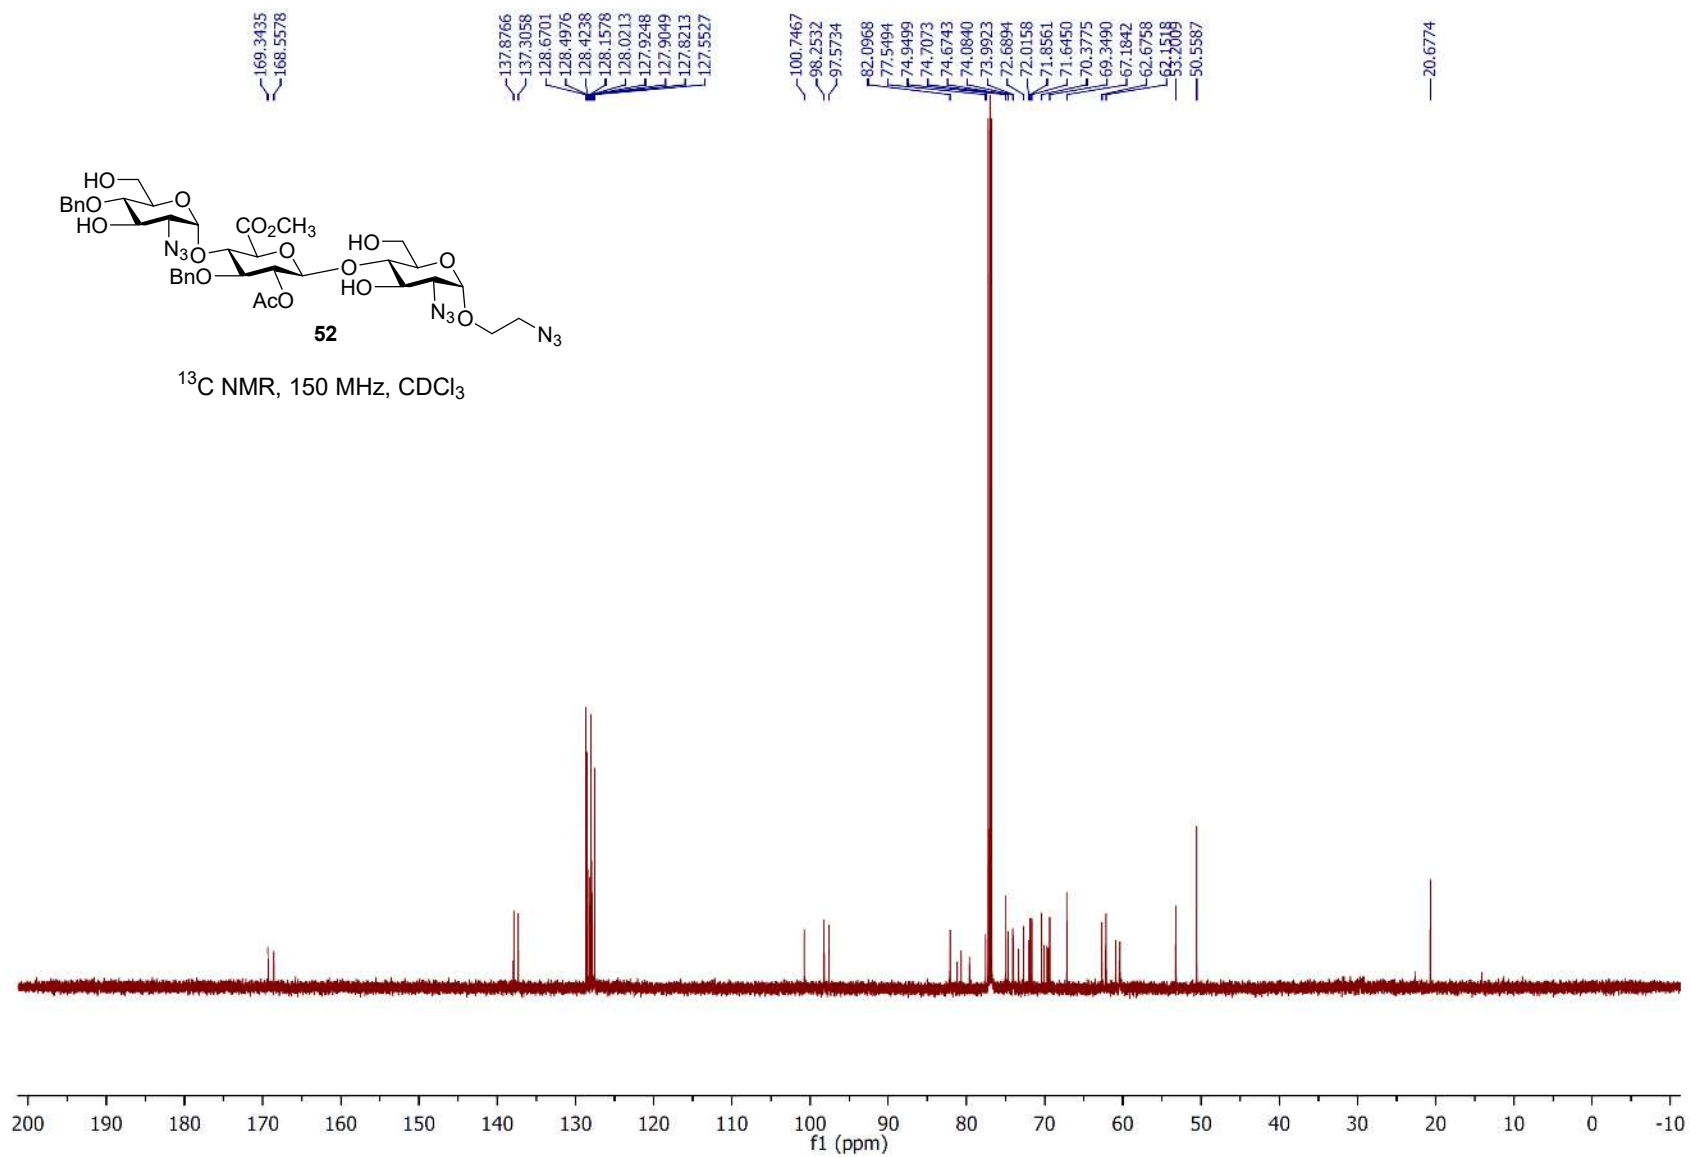

7.3898  
7.3780  
7.3487  
7.3455  
7.3414  
7.3364  
7.3280  
7.3264  
7.3252  
7.3148  
7.3131  
7.3027  
7.2975  
7.2934  
7.2888  
7.2828  
7.2804  
7.2755  
7.2680  
7.2566  
7.2482  
5.4817  
5.4754  
4.9591  
4.9412  
4.9289  
4.9227  
4.9043  
4.8511  
4.8437  
4.8338  
4.8155  
4.8125  
4.7918  
4.7739  
4.6928  
4.6804  
4.6506  
4.6319  
4.0504  
4.0354  
3.9890  
3.9764  
3.9632  
3.9062  
3.8904  
3.8565  
3.8417  
3.8394  
3.8247  
3.7924  
3.7892  
3.7715  
3.7681  
3.7597  
3.7442  
3.7392  
3.7185  
3.7146  
3.6577  
3.6509  
3.6474  
3.6441  
3.6381  
3.6302  
3.6262  
3.6200  
3.5551  
3.5199  
3.5034  
3.4702  
3.3939  
3.3883  
3.3754  
3.3718  
3.3445  
3.3404  
3.3386  
3.3282  
3.2709  
3.2647  
3.2537  
3.2474

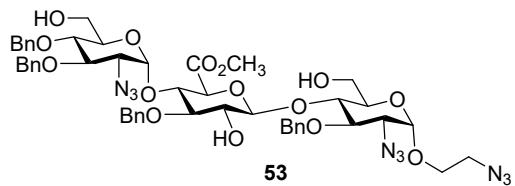

$^1\text{H NMR}$ , 600 MHz,  $\text{CDCl}_3$

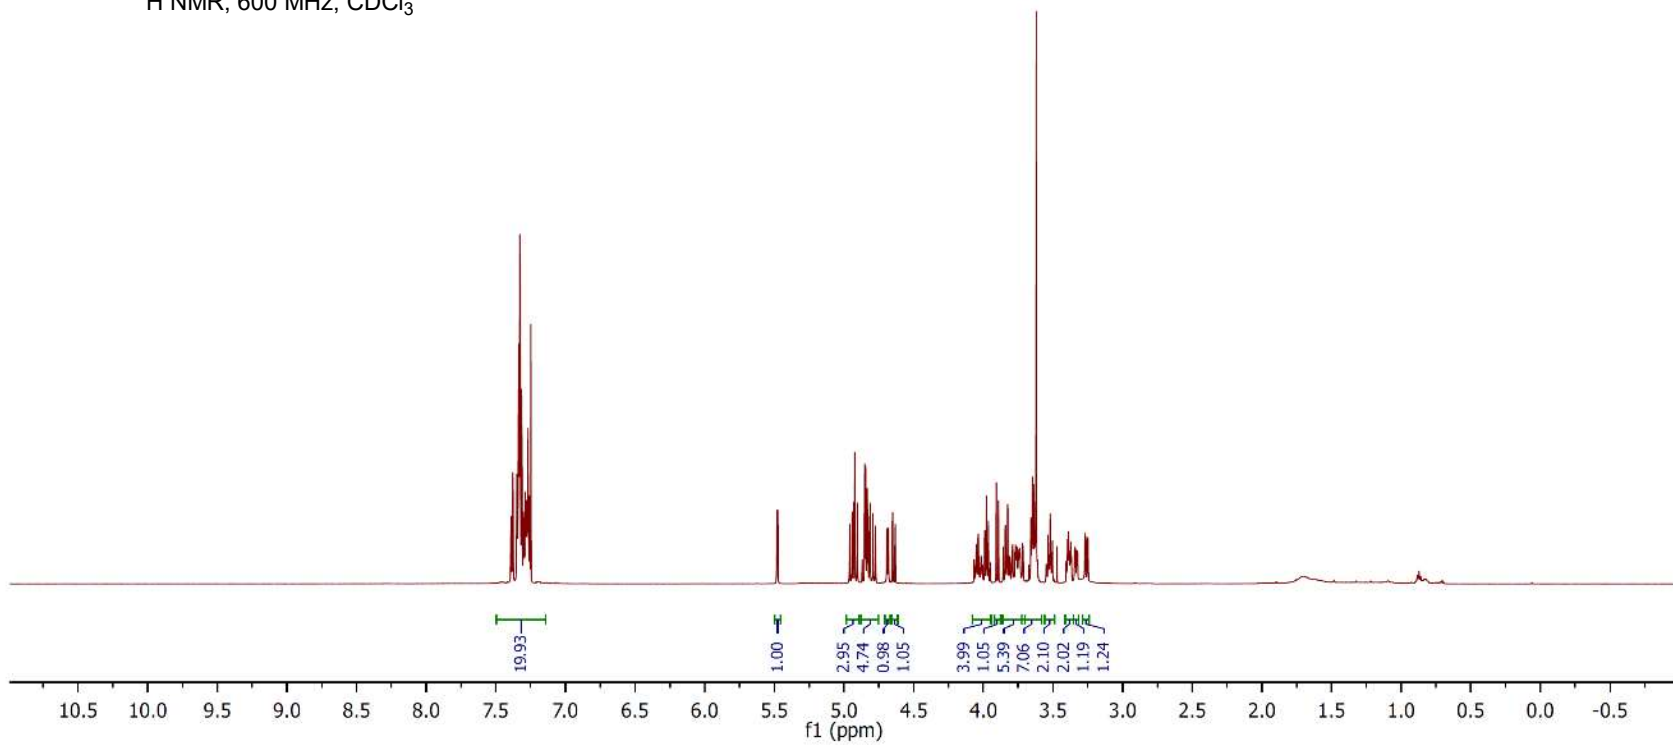

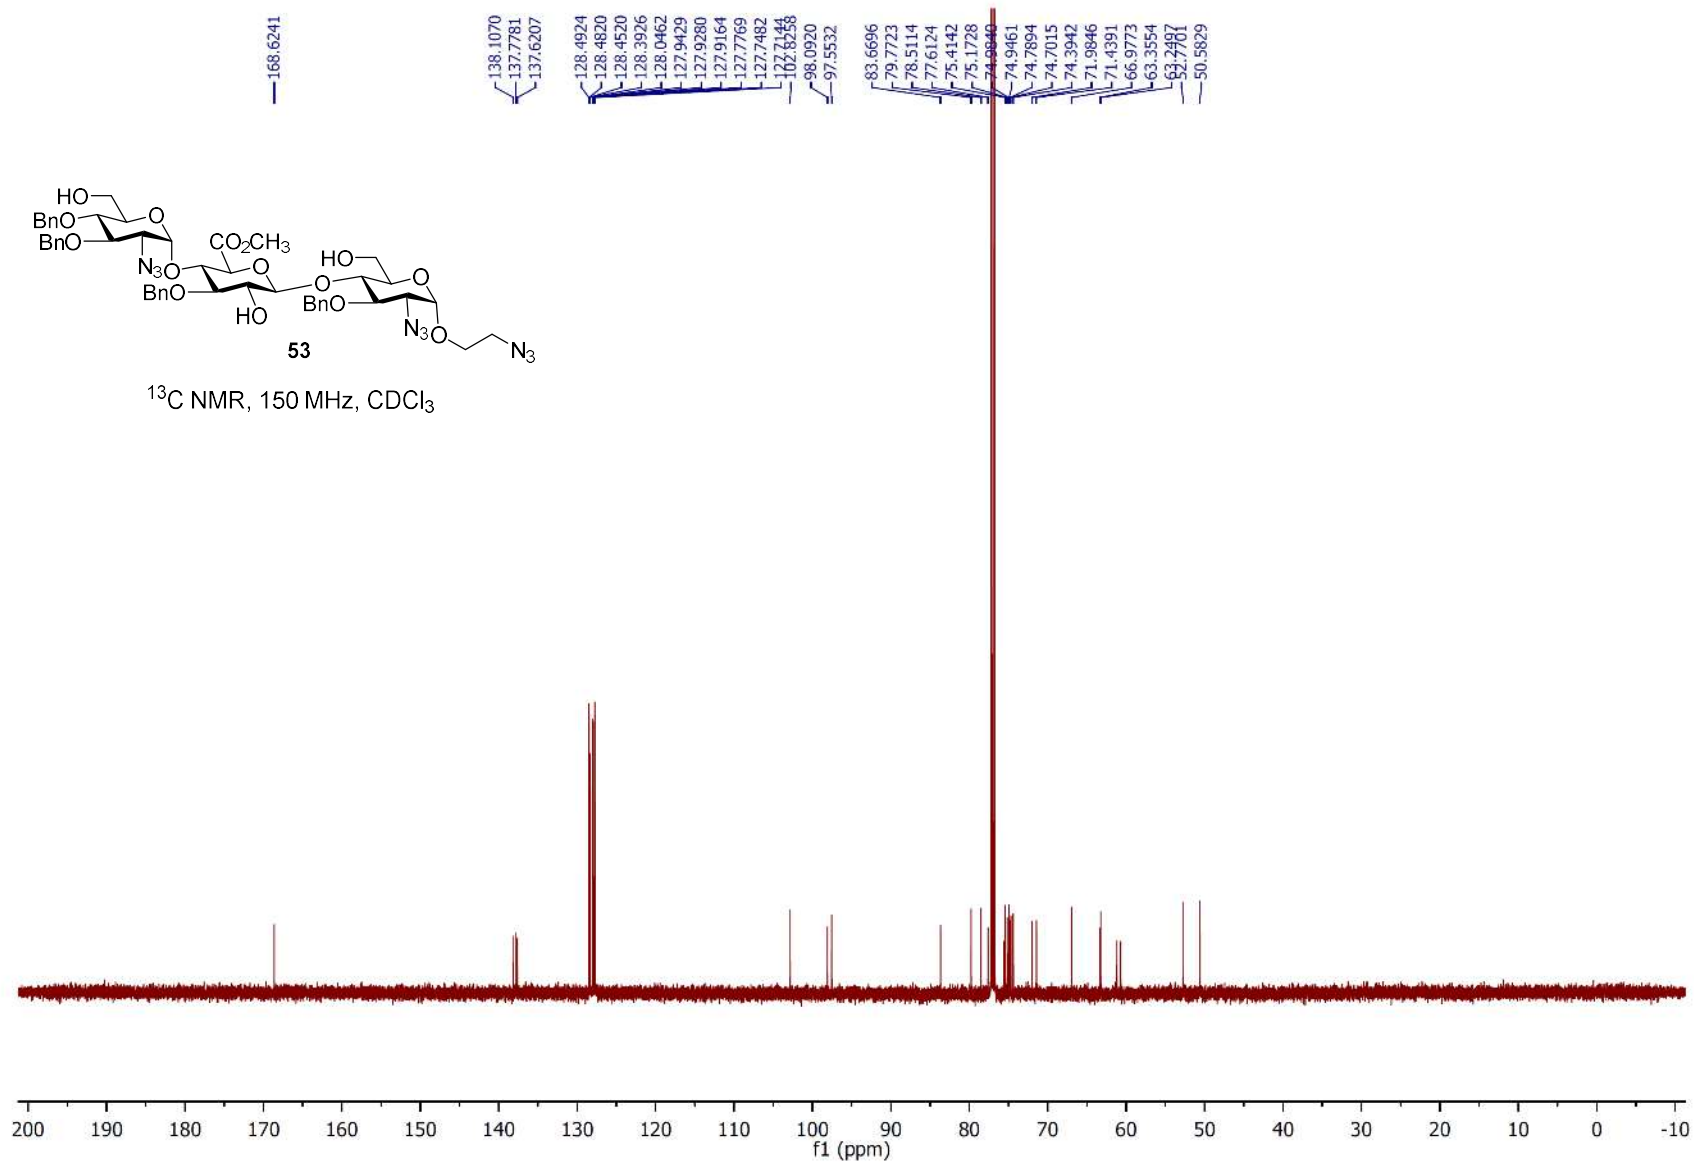



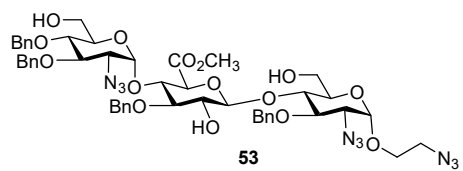

$^1\text{H}$ - $^{13}\text{C}$  HSQC, 600/150MHz,  $\text{CDCl}_3$

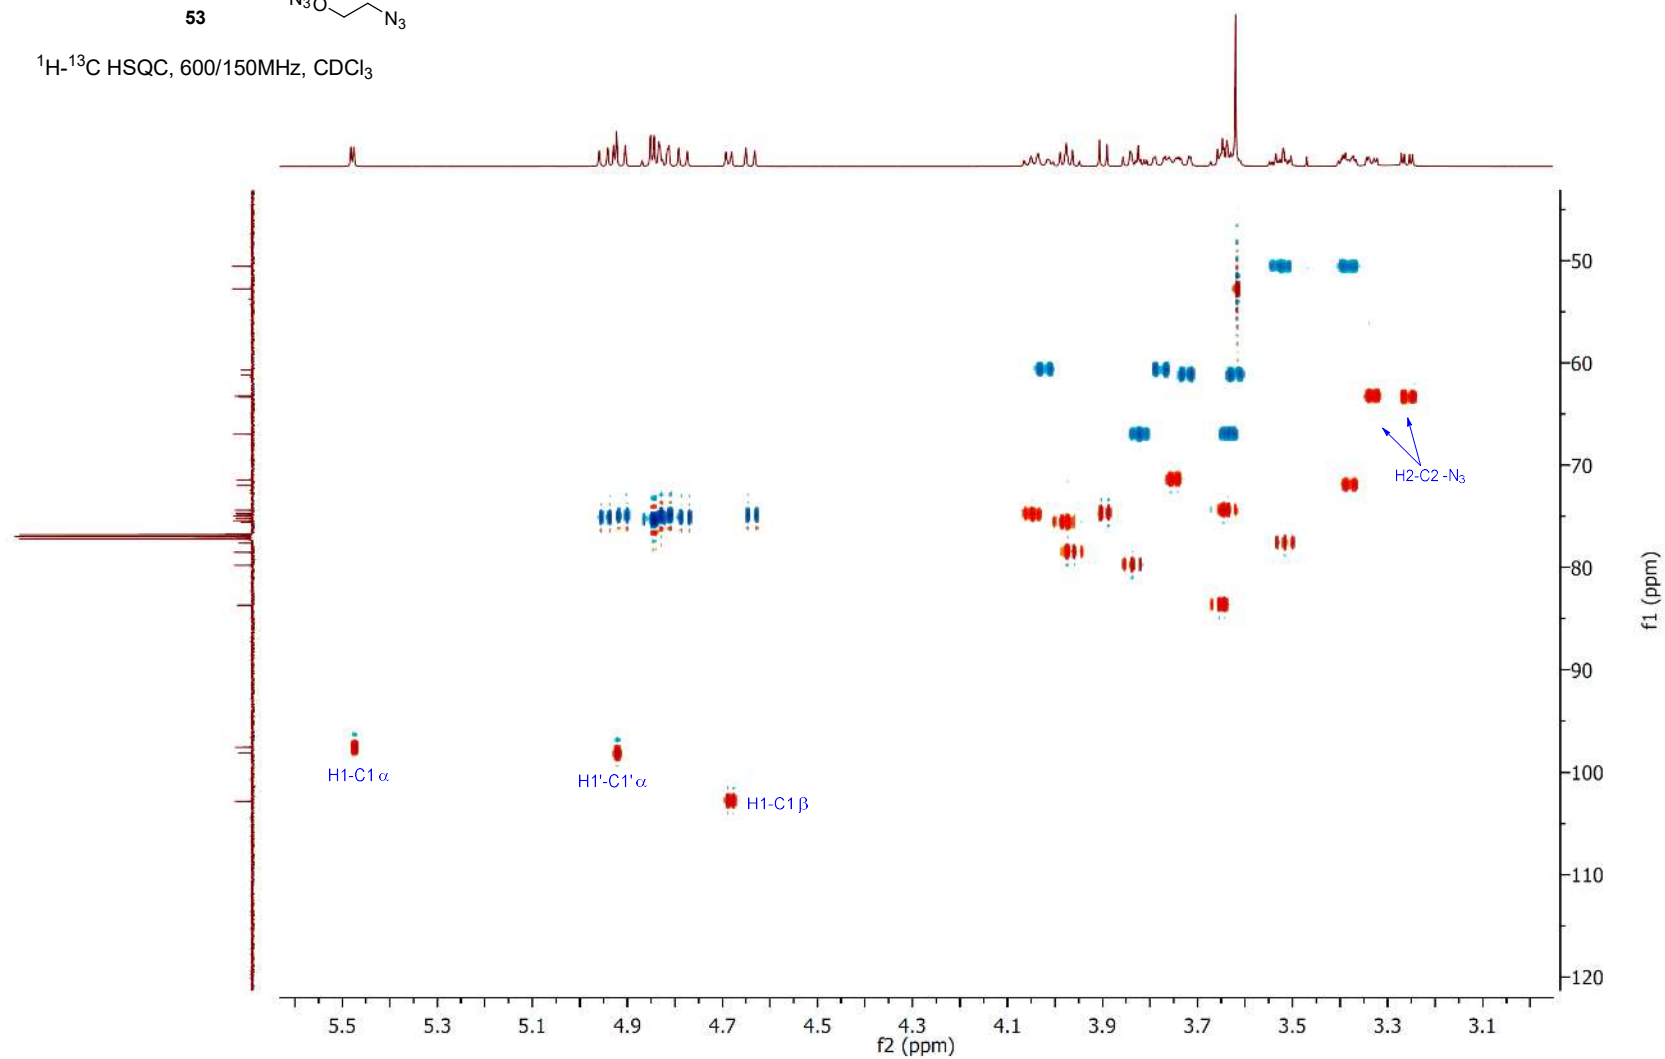

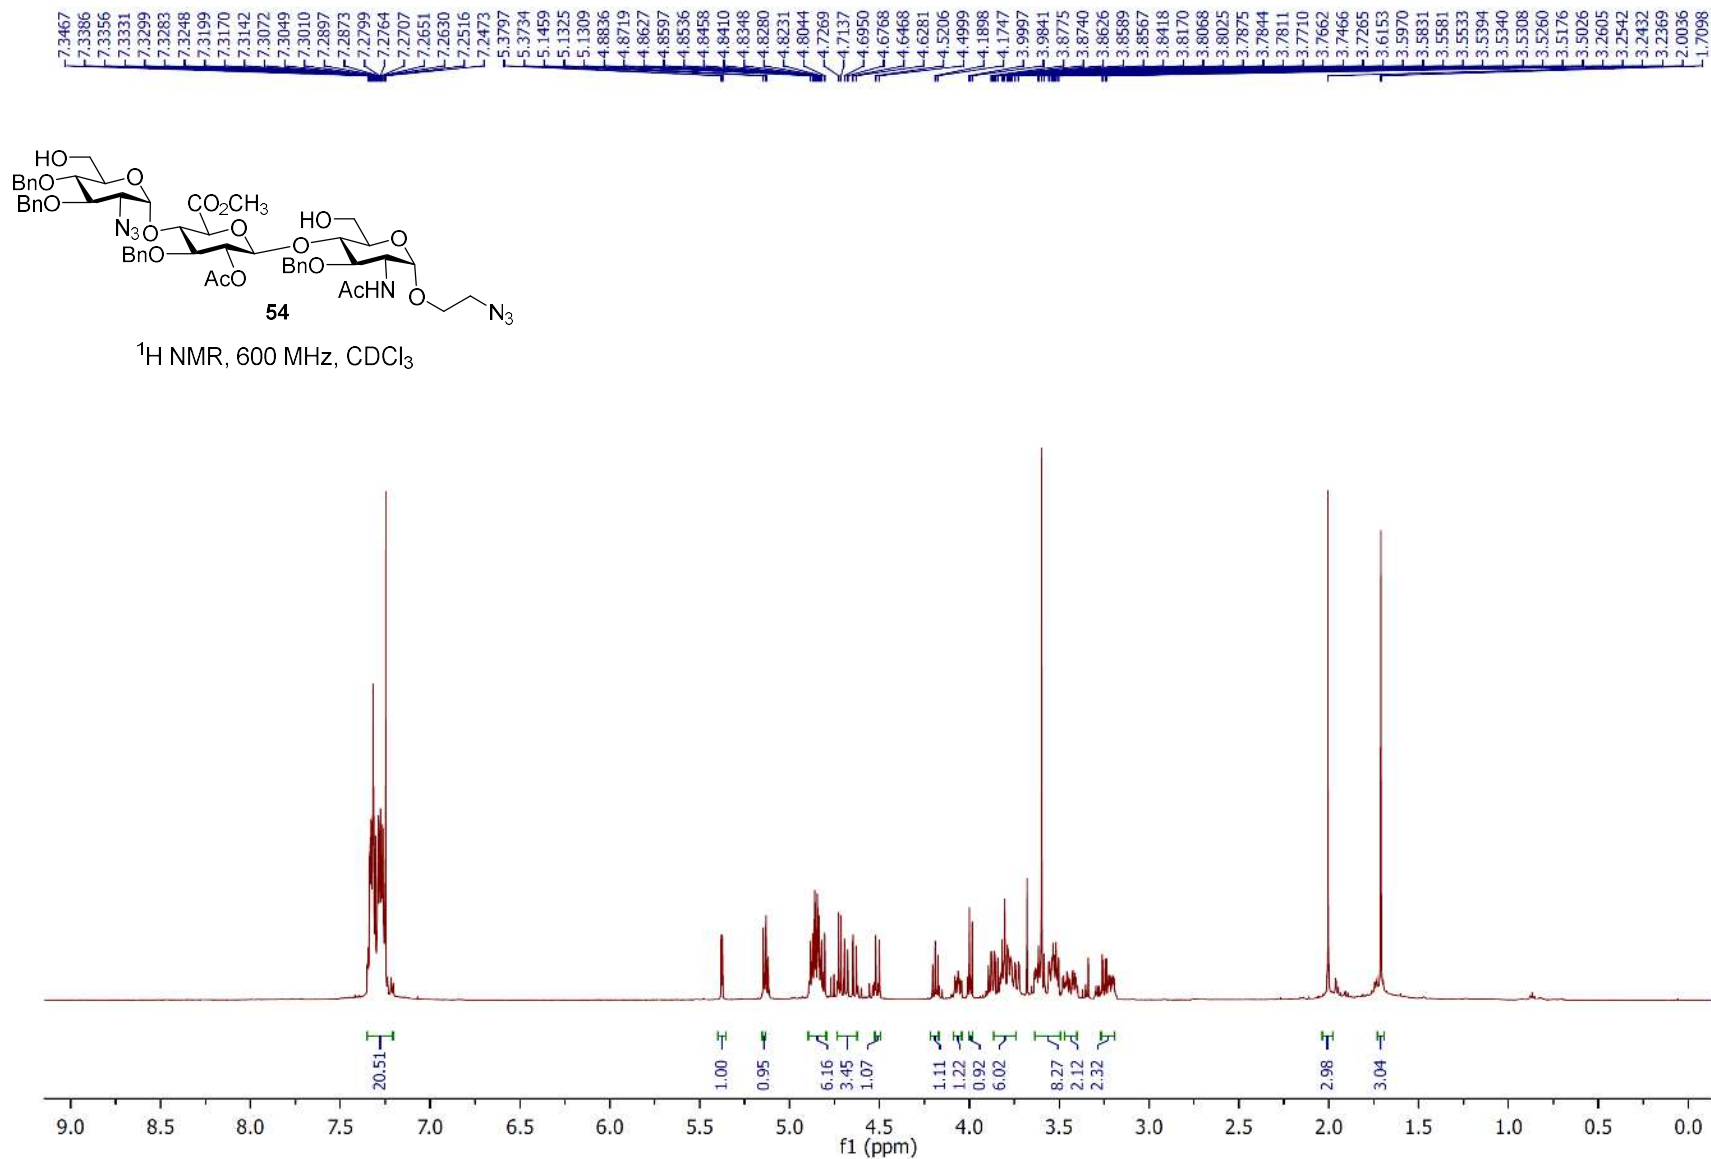

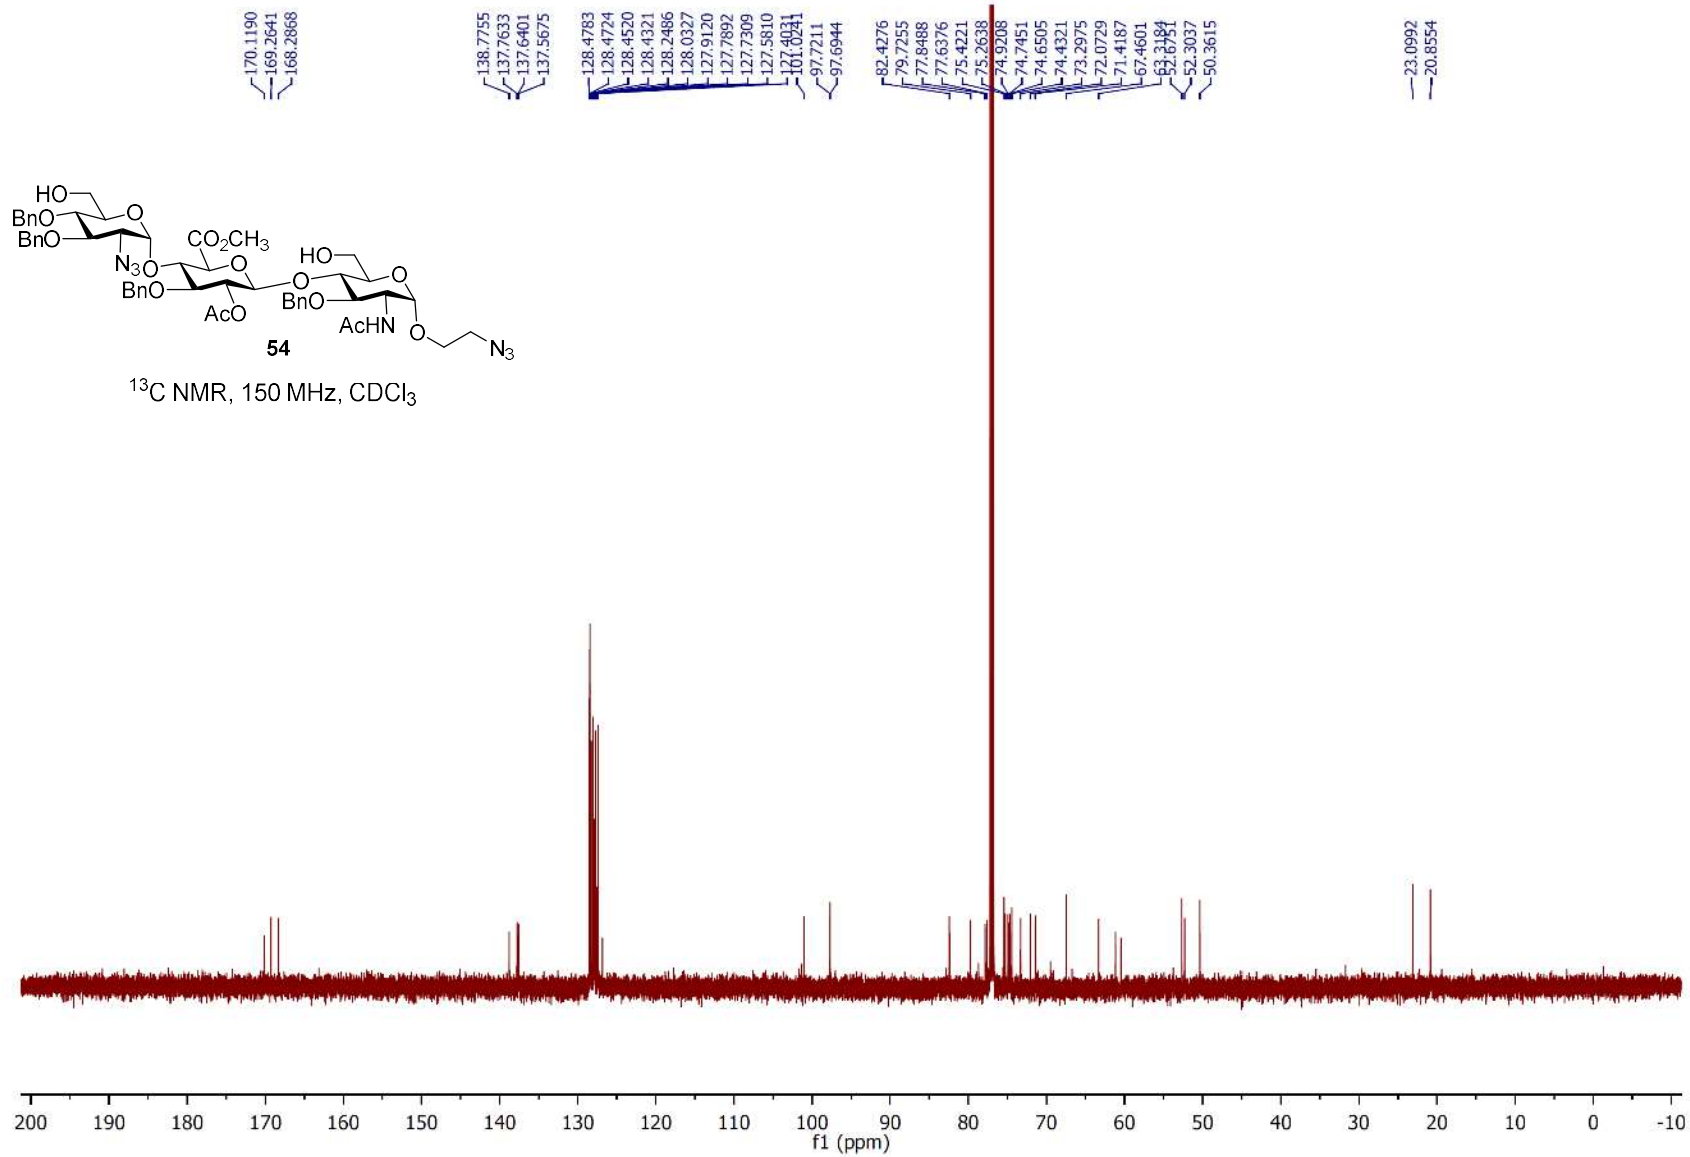

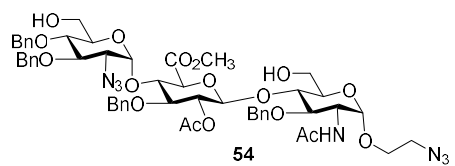

$^1\text{H}$ - $^{13}\text{C}$  HSQC, 600/150MHz,  $\text{CDCl}_3$

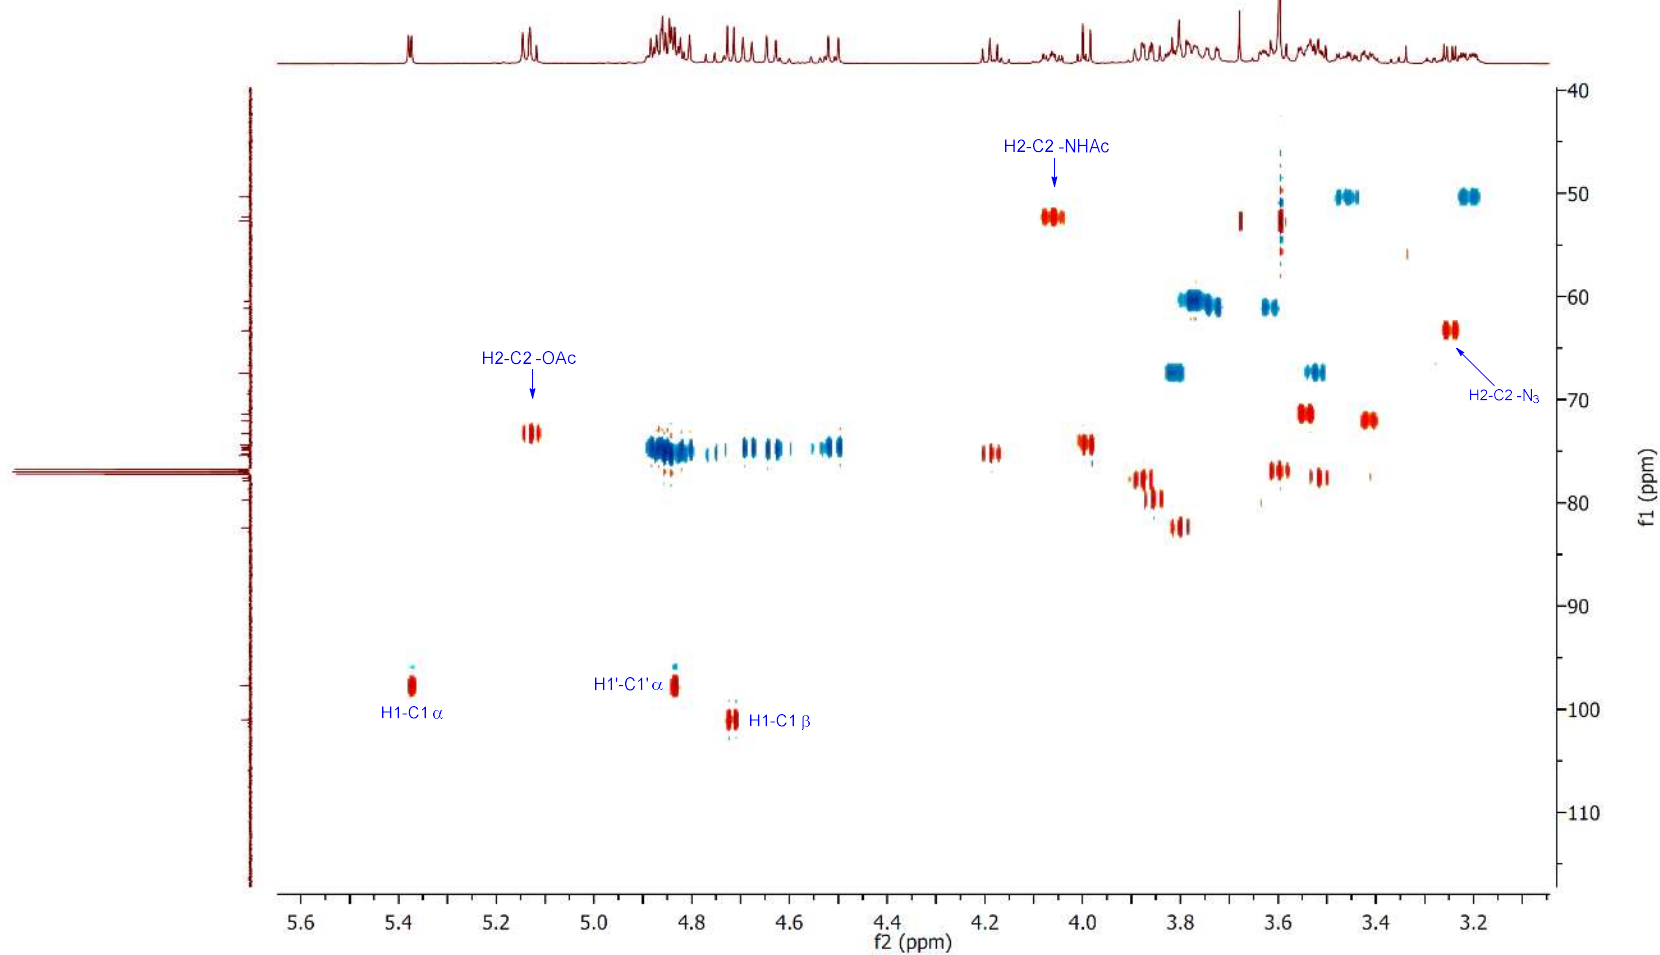

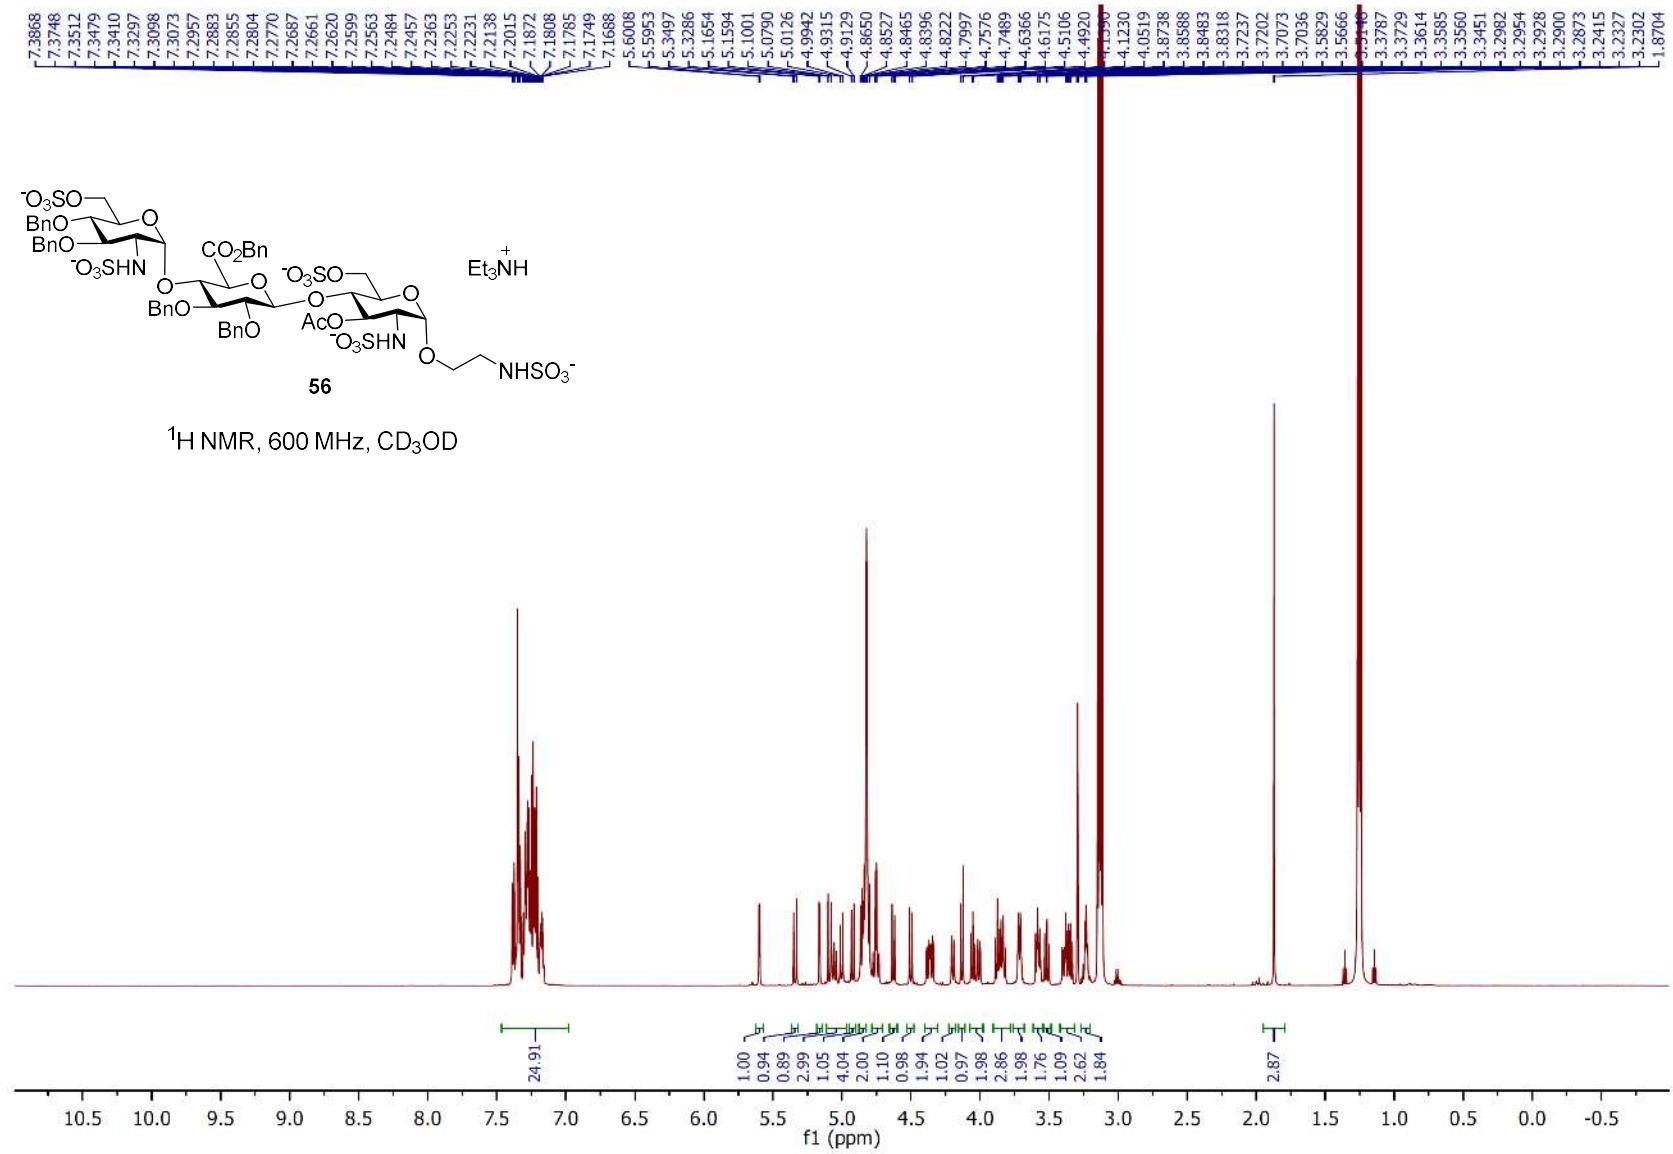

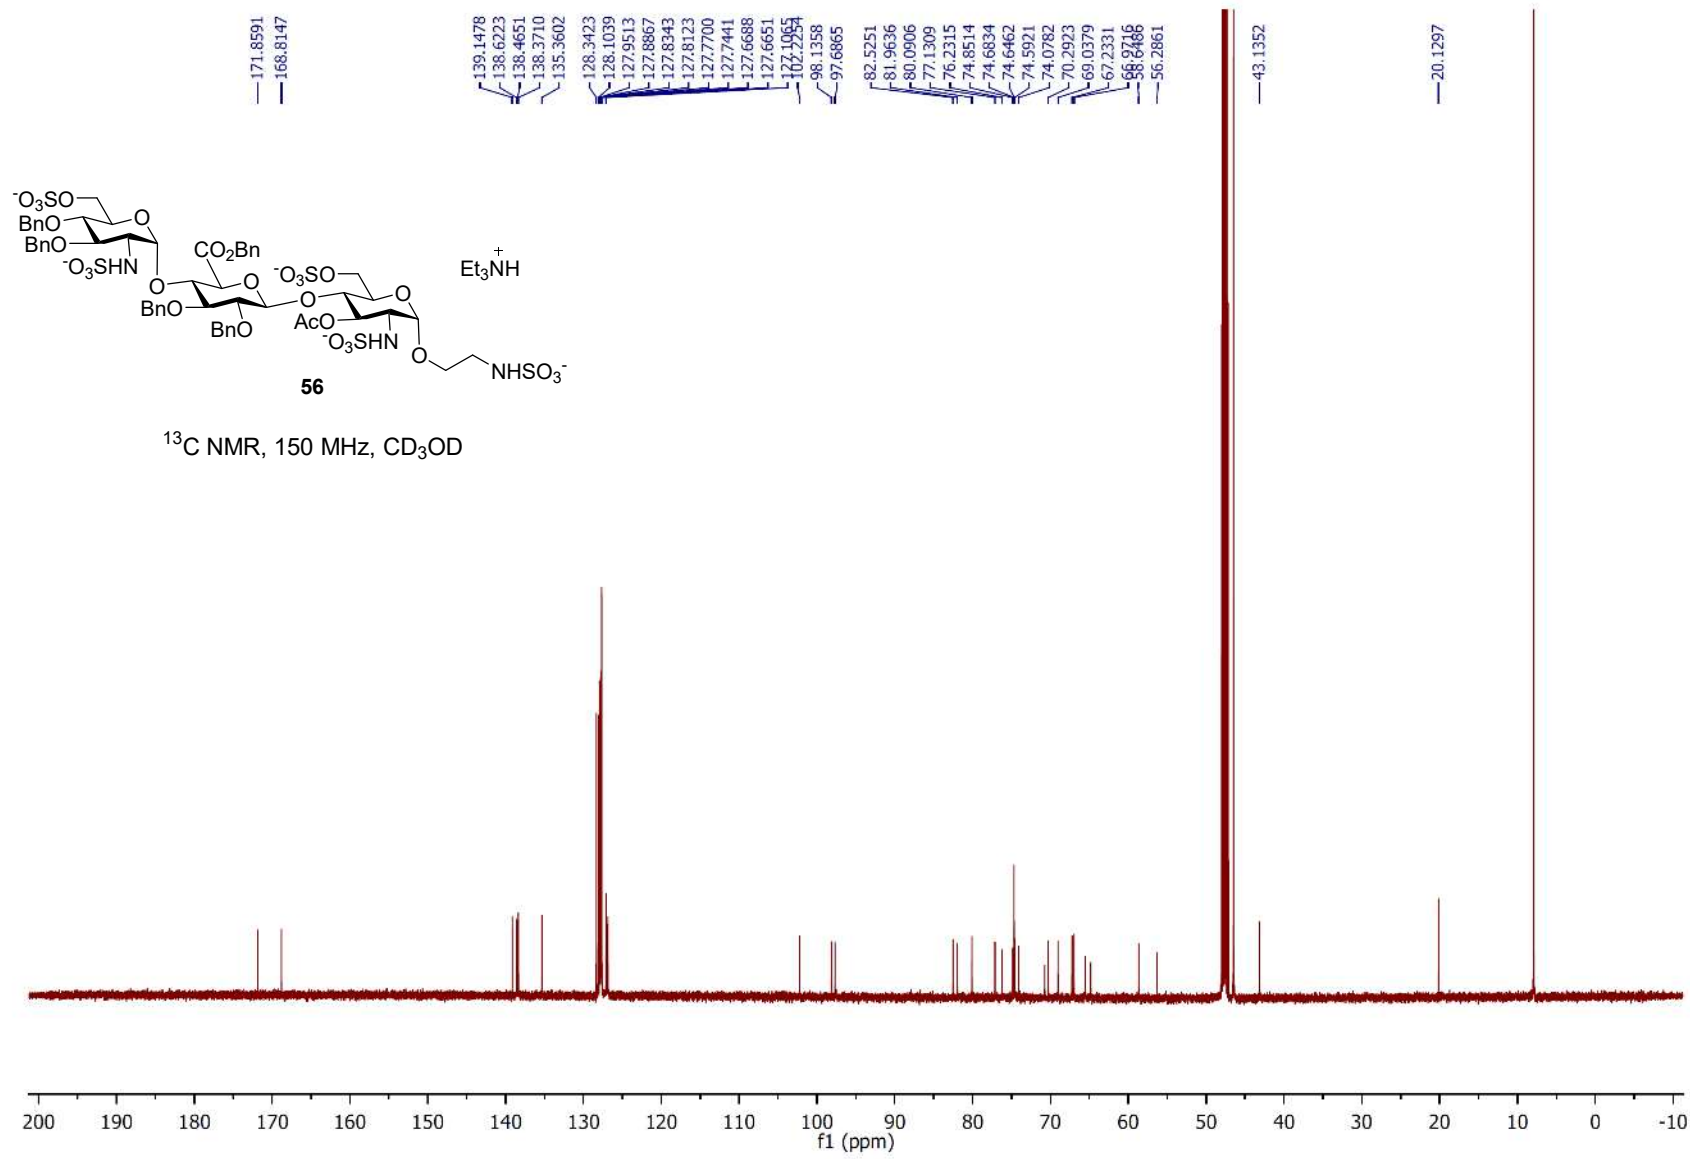

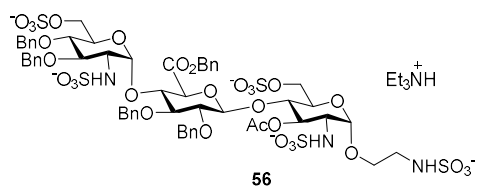

$^1\text{H}$ - $^1\text{H}$  COSY, 600 MHz,  $\text{CD}_3\text{OD}$

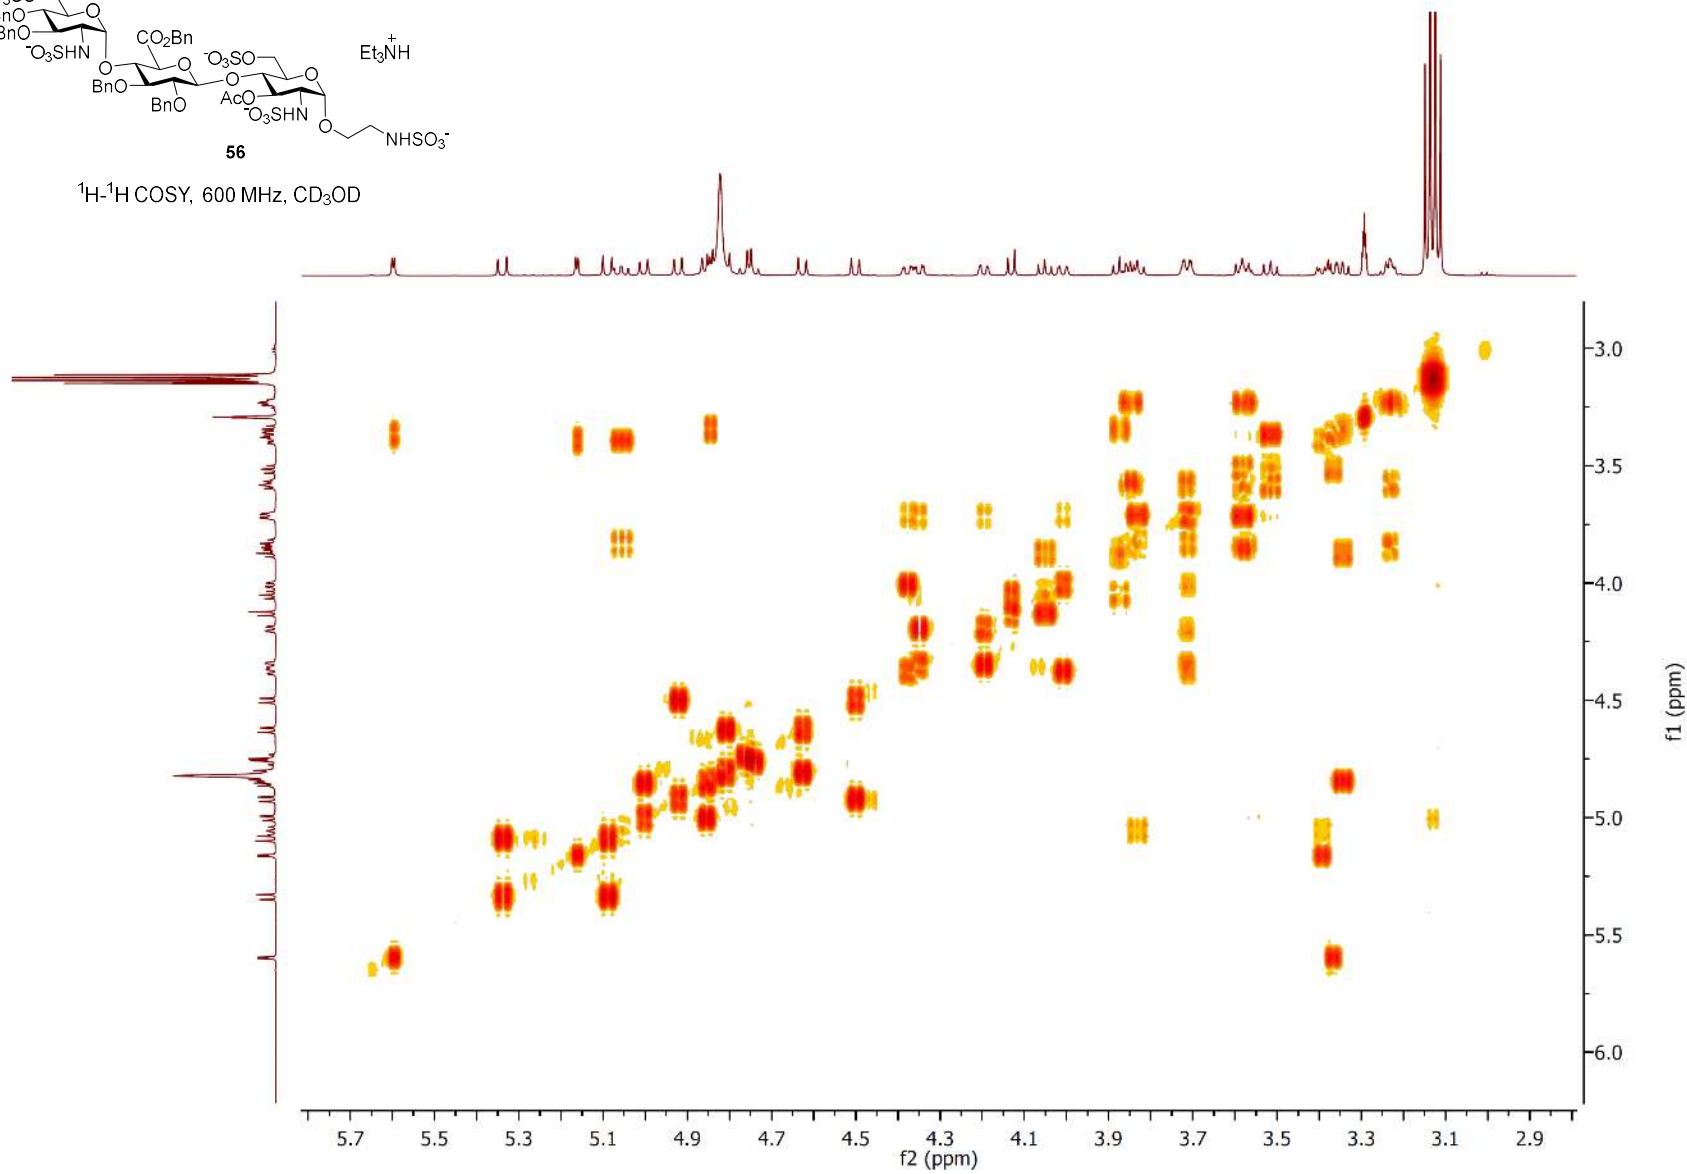

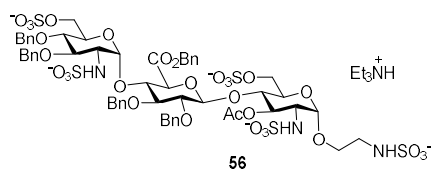

$^1\text{H}$ - $^{13}\text{C}$  HSQC, 600/150MHz,  $\text{CD}_3\text{OD}$

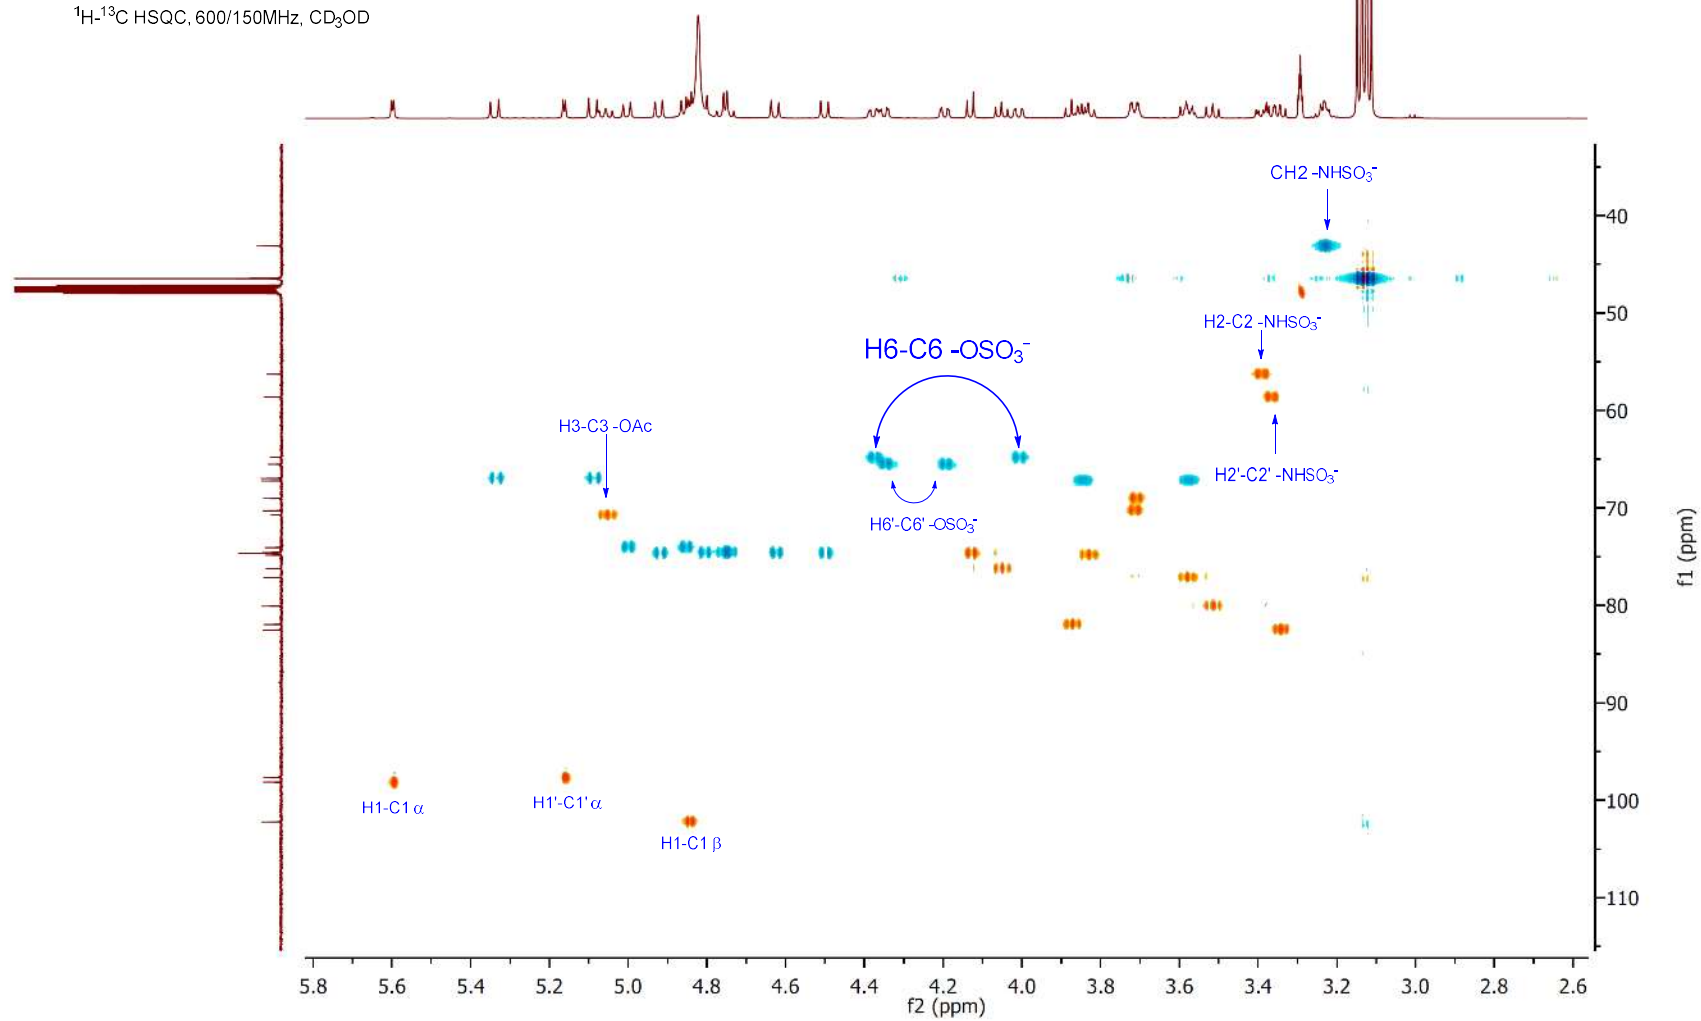



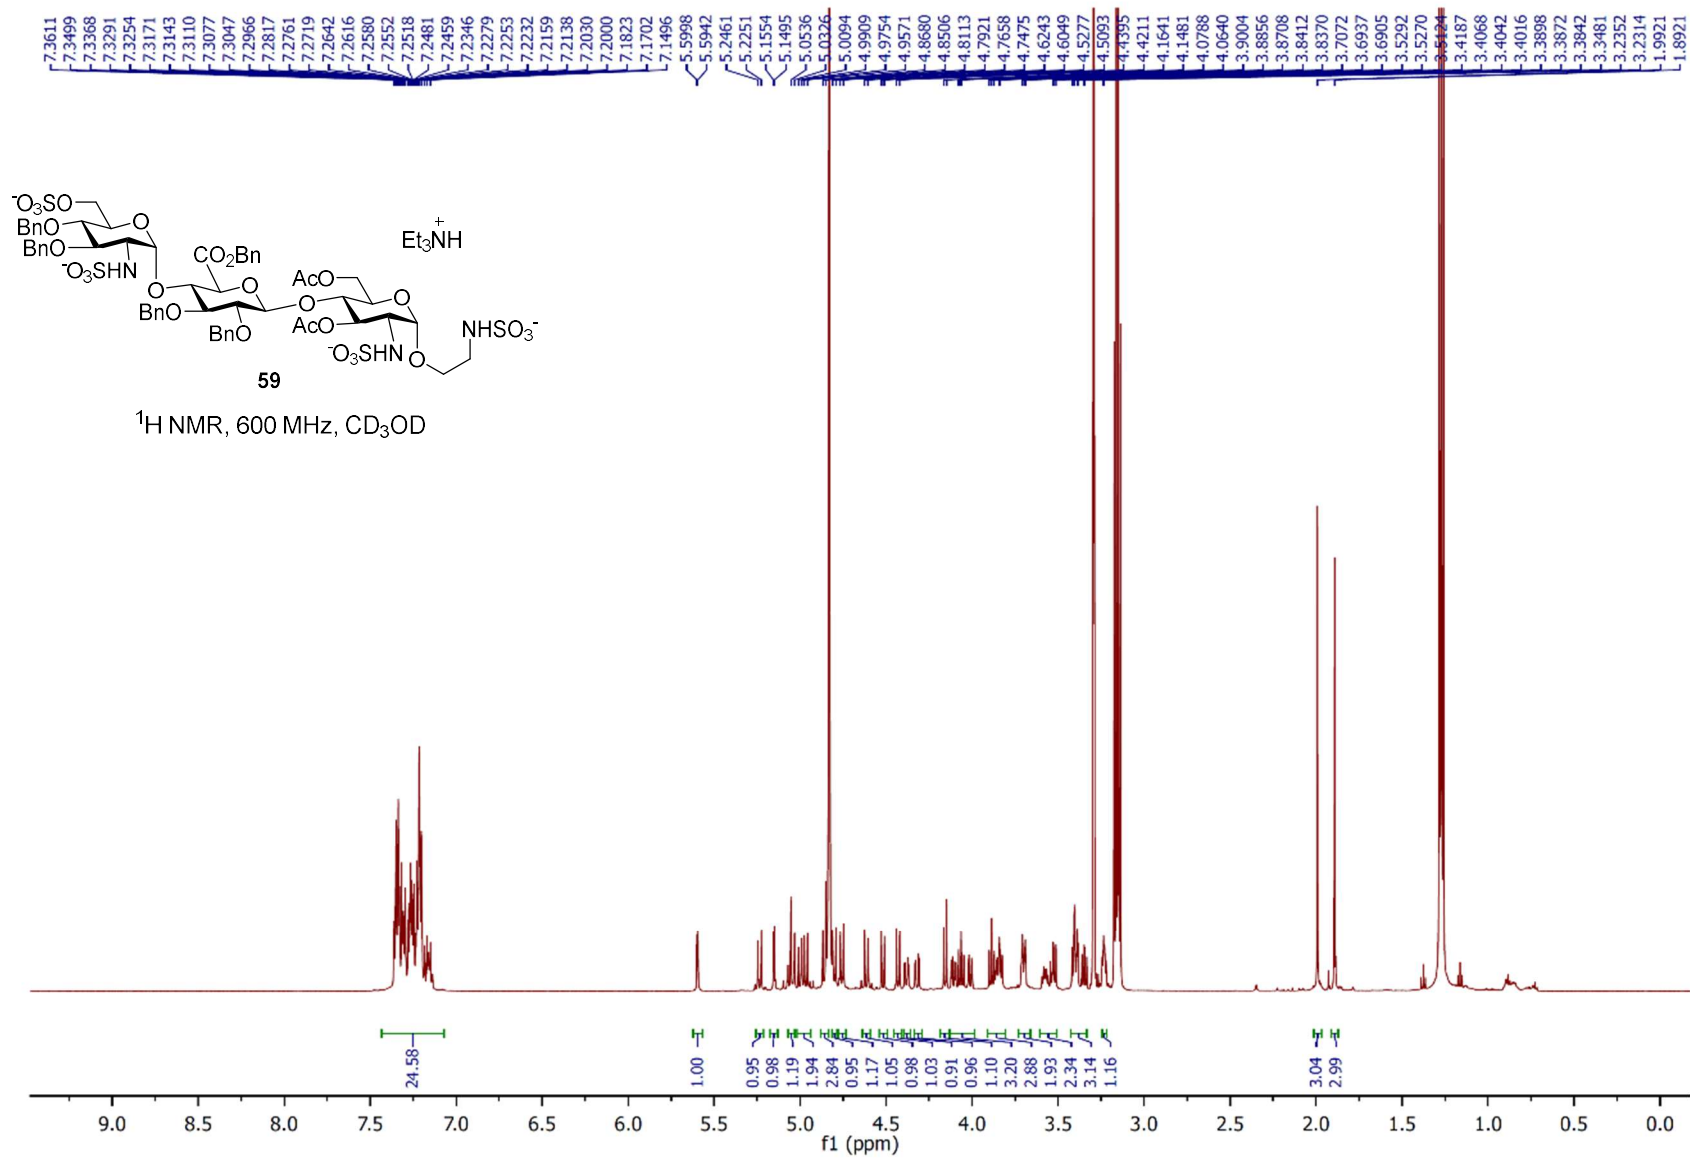

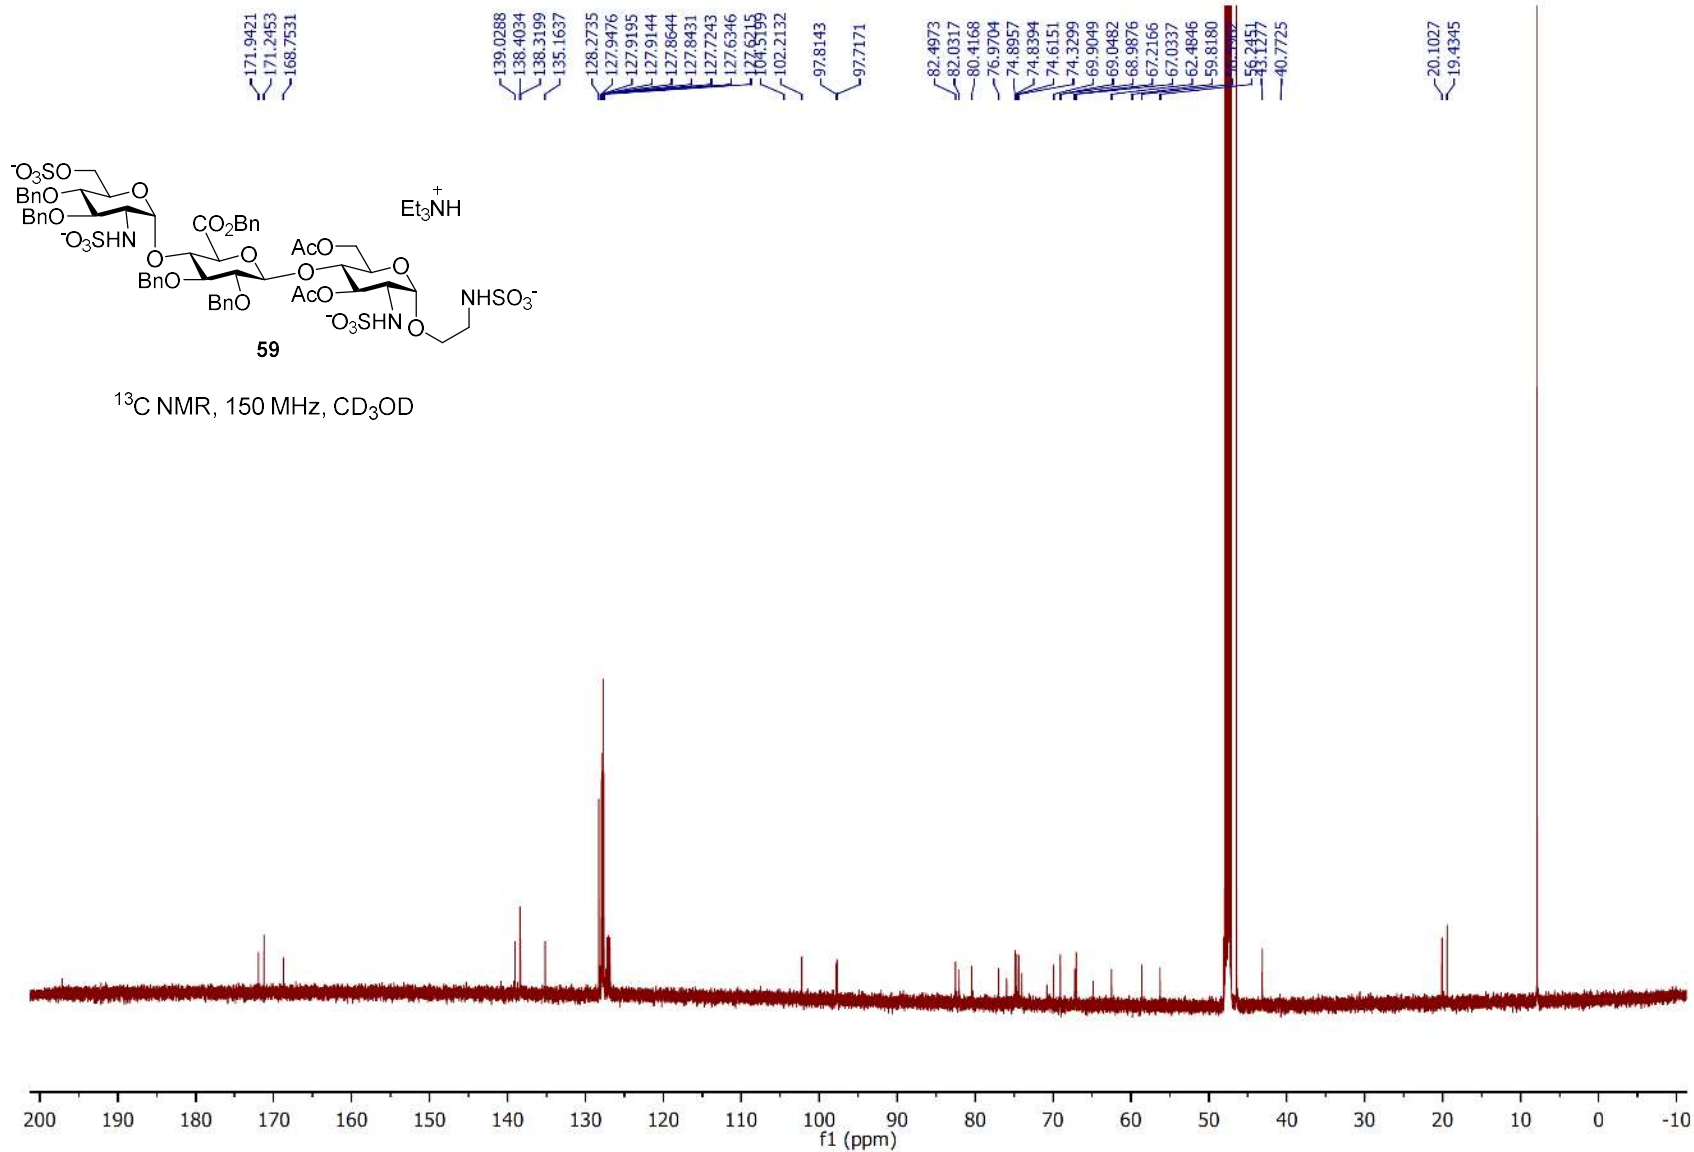

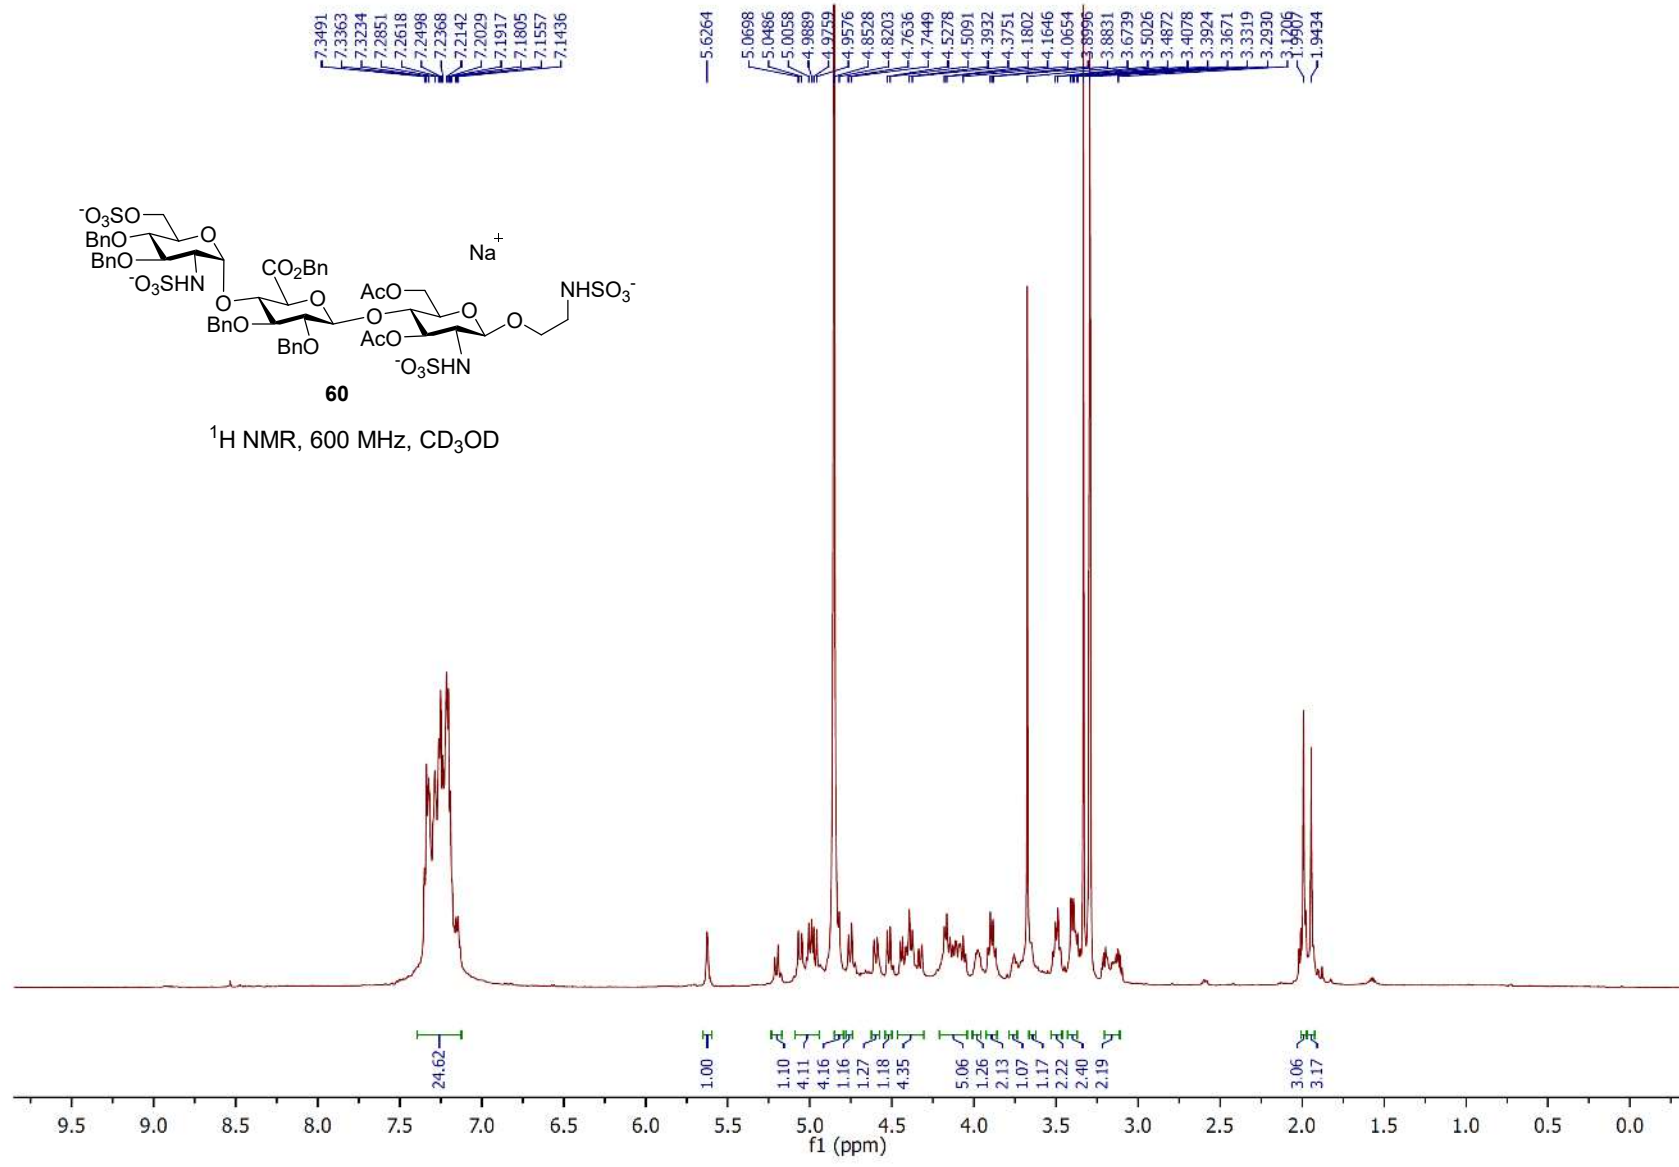

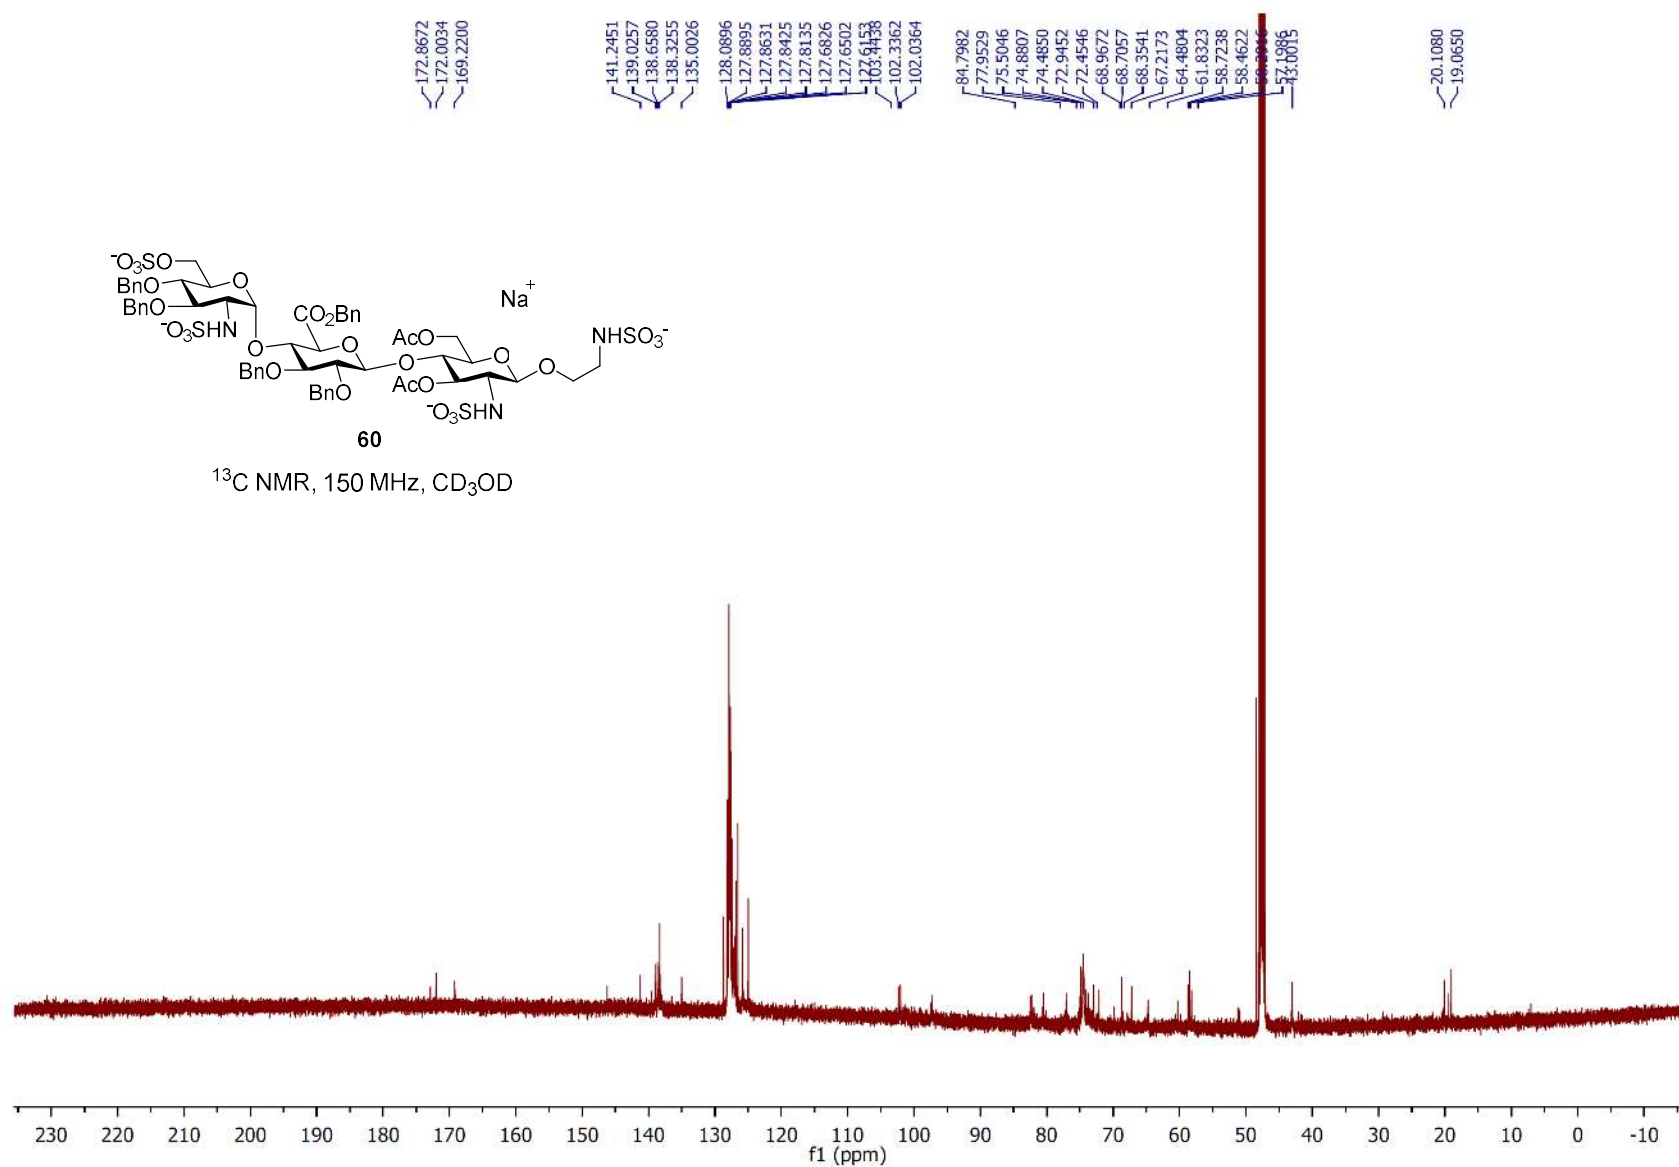

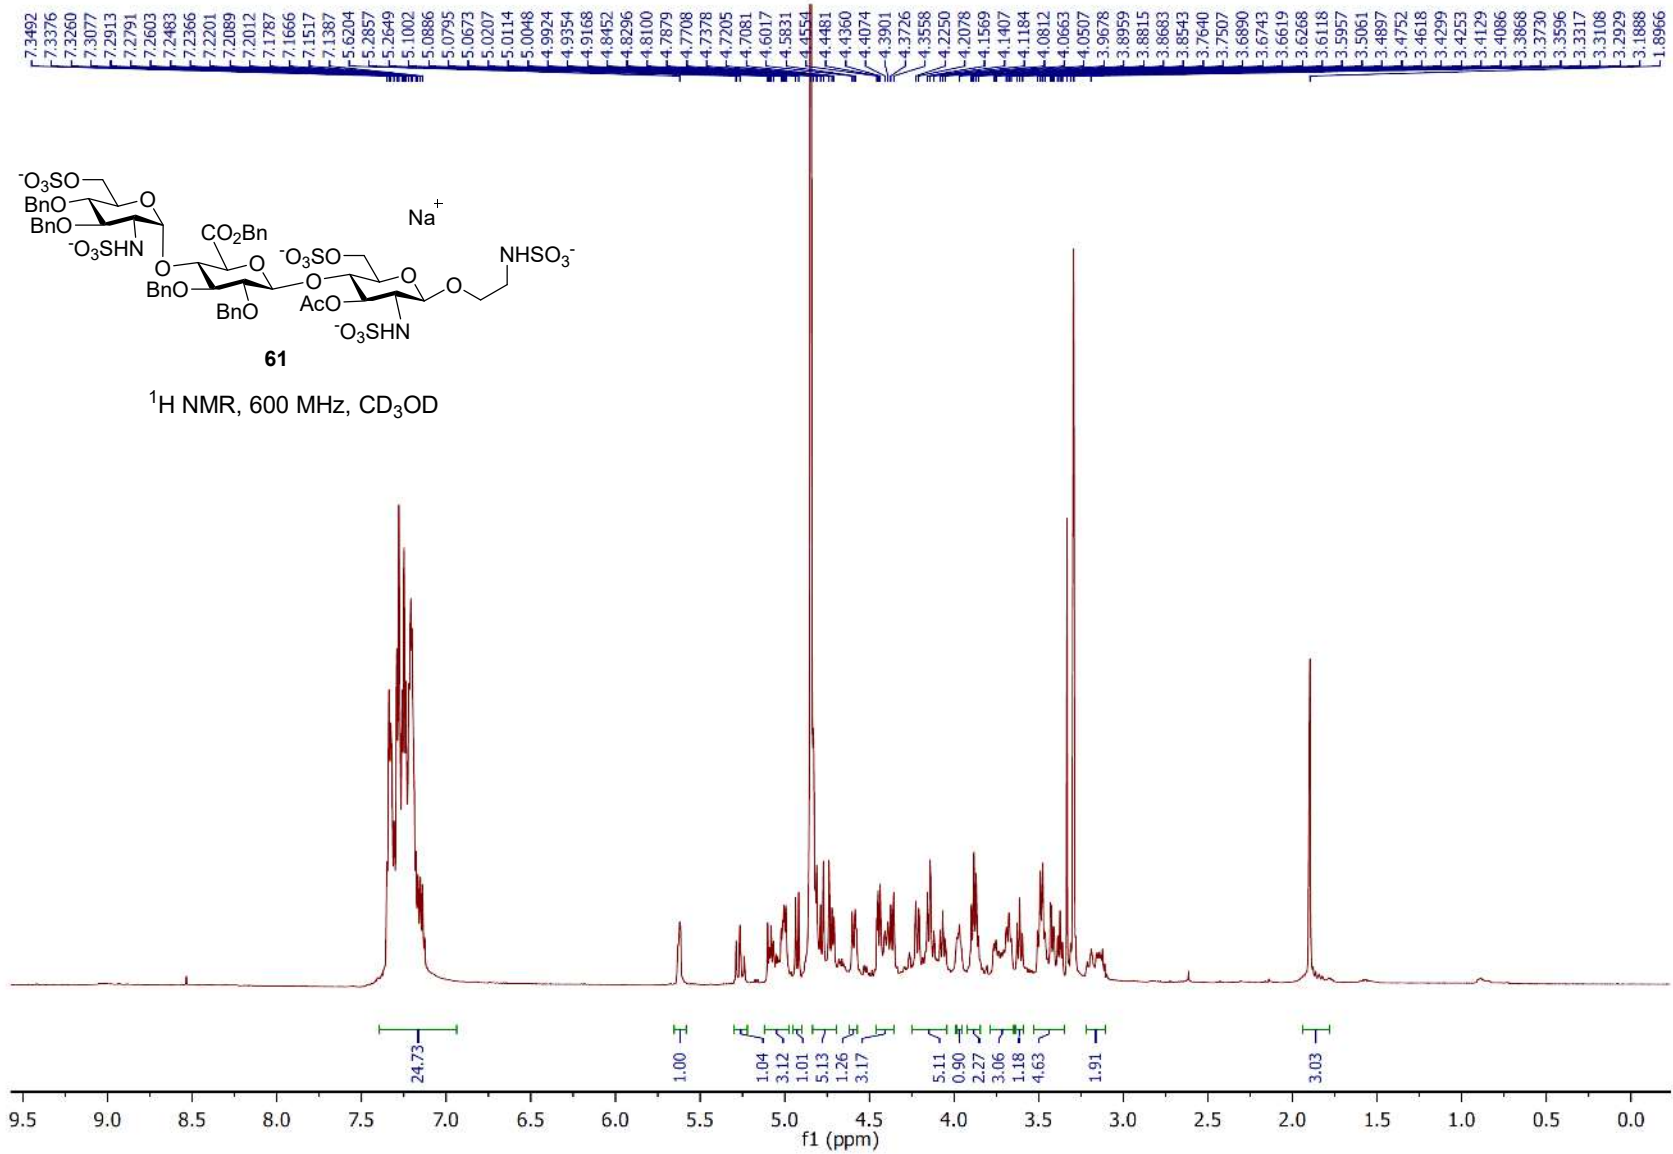

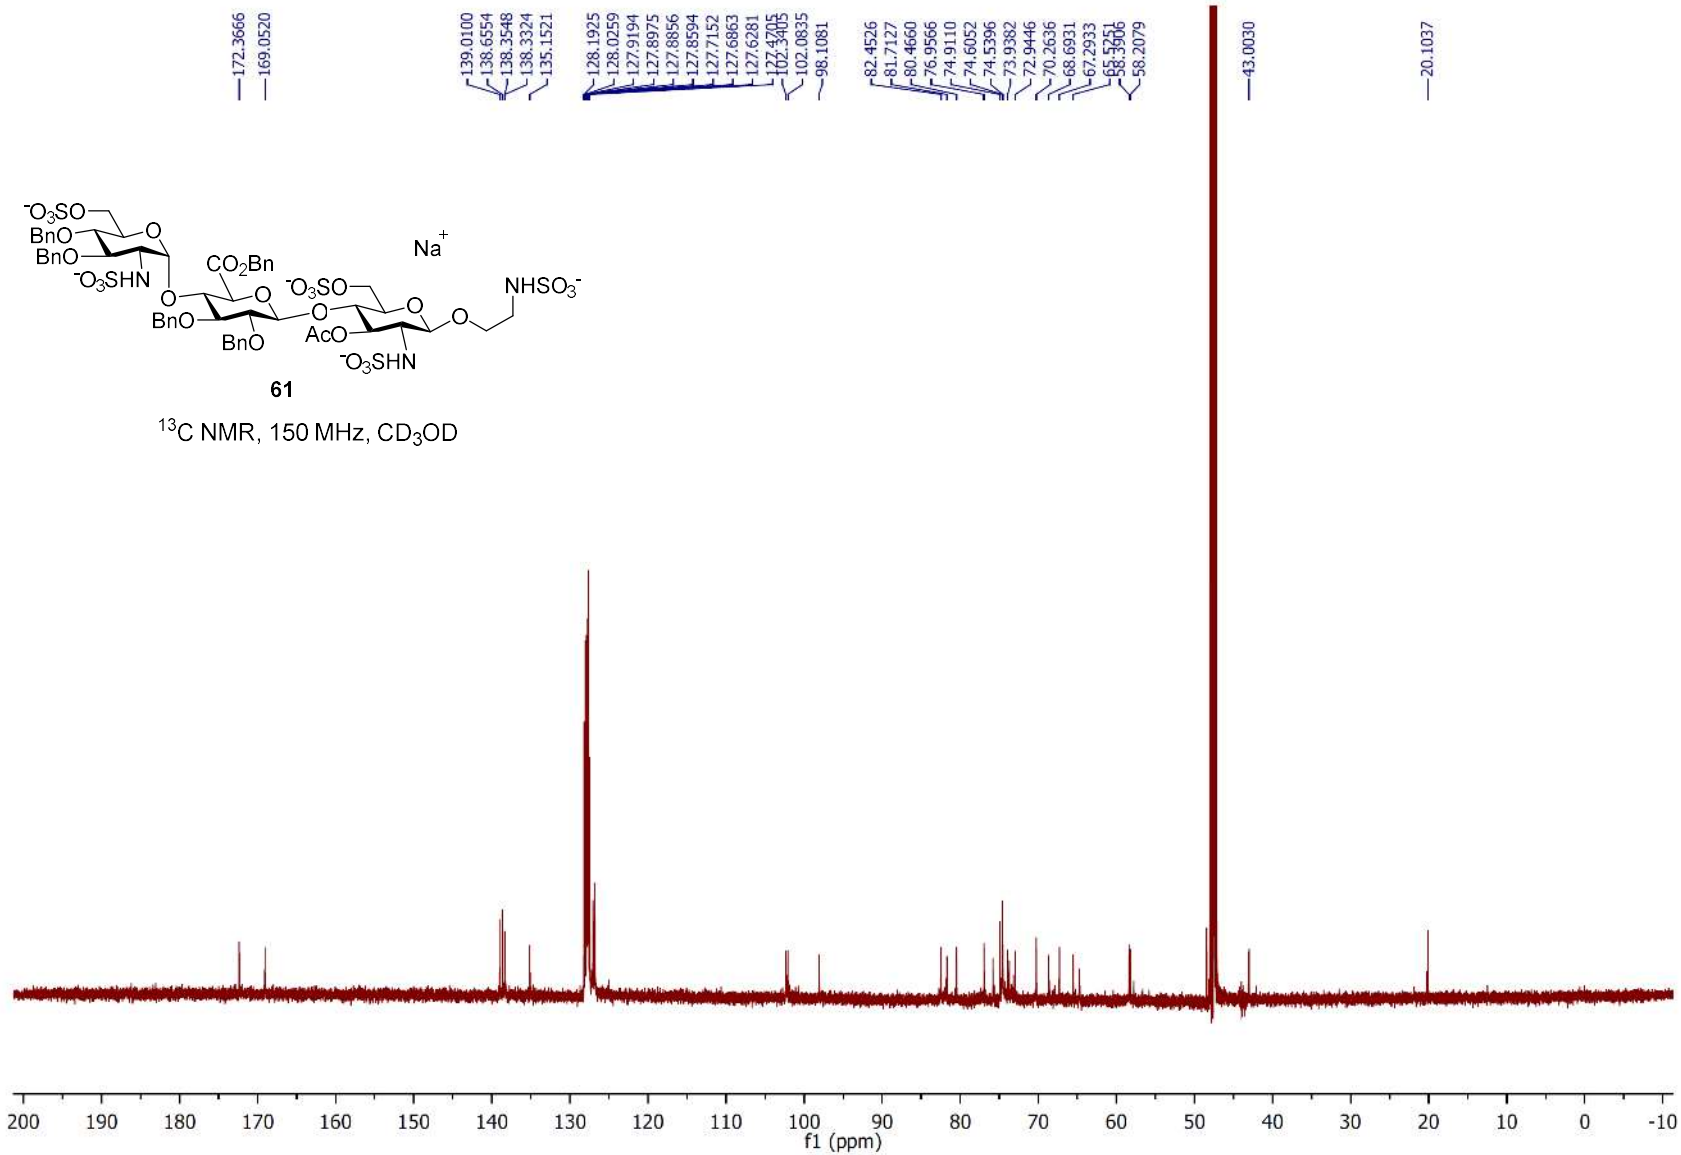

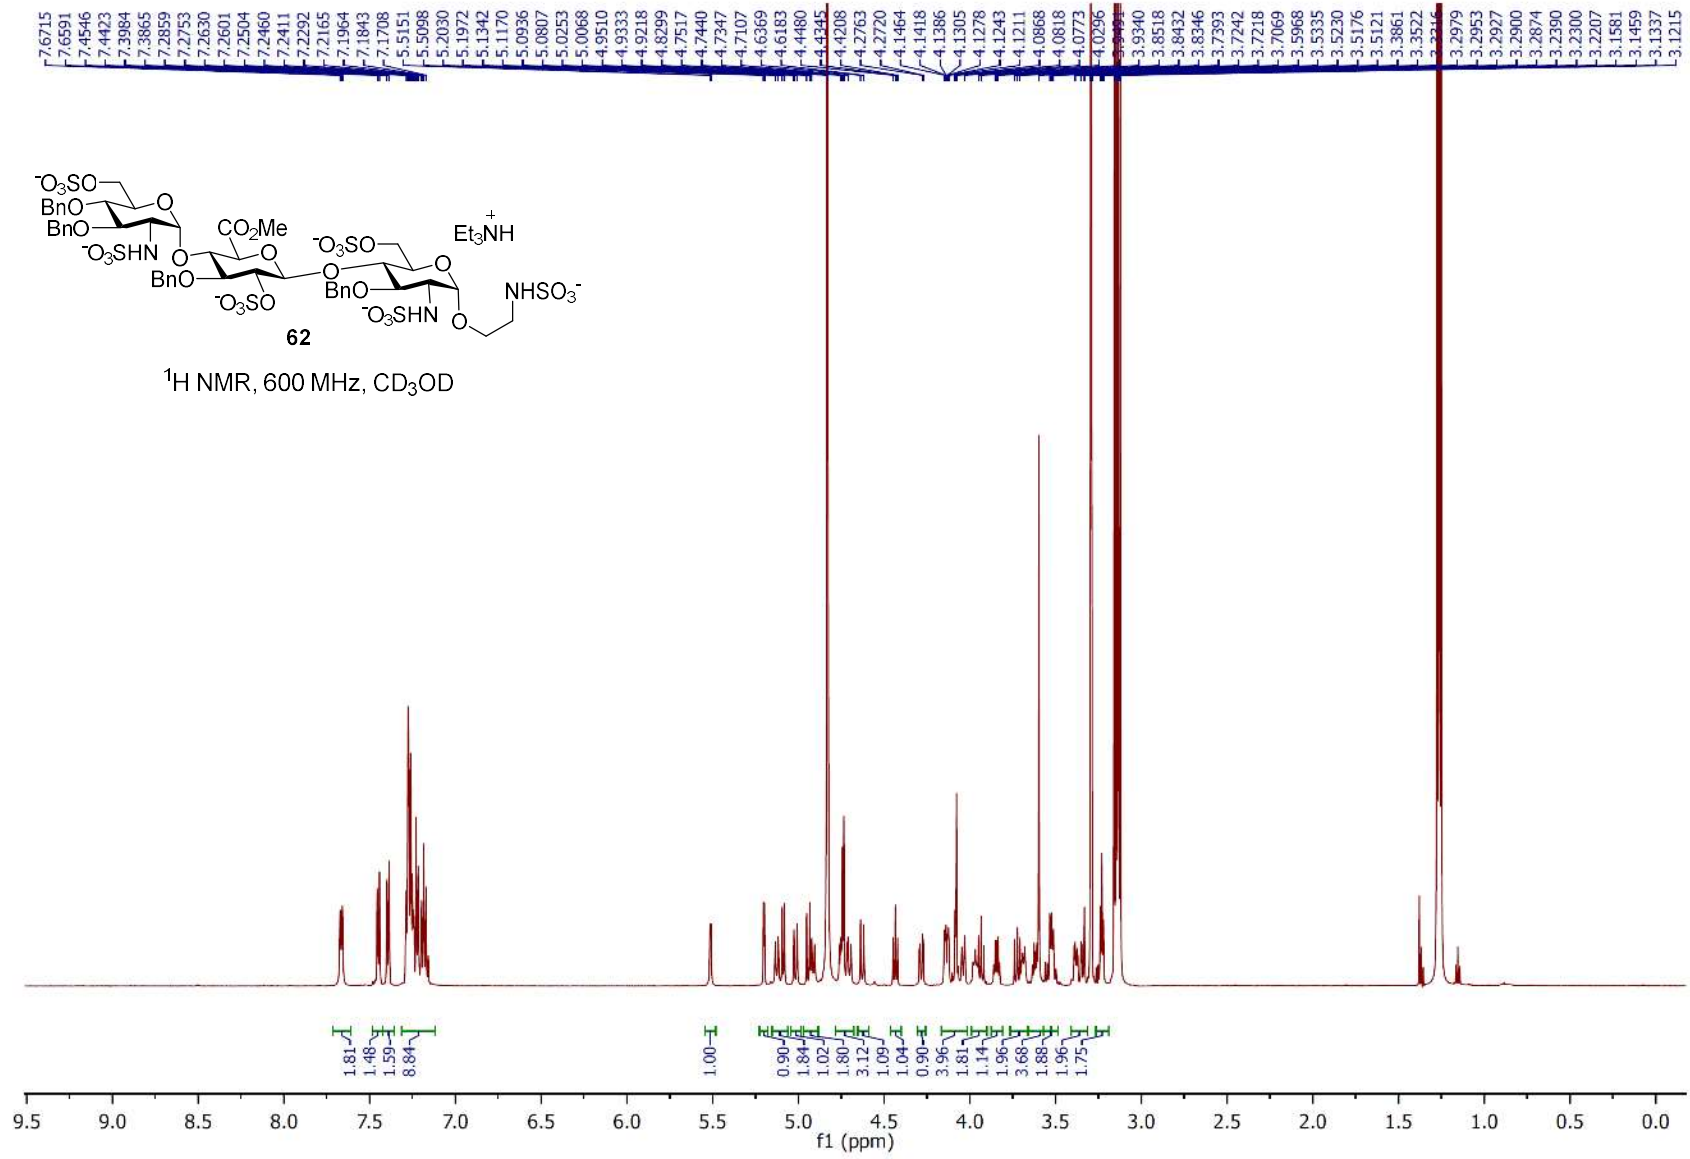

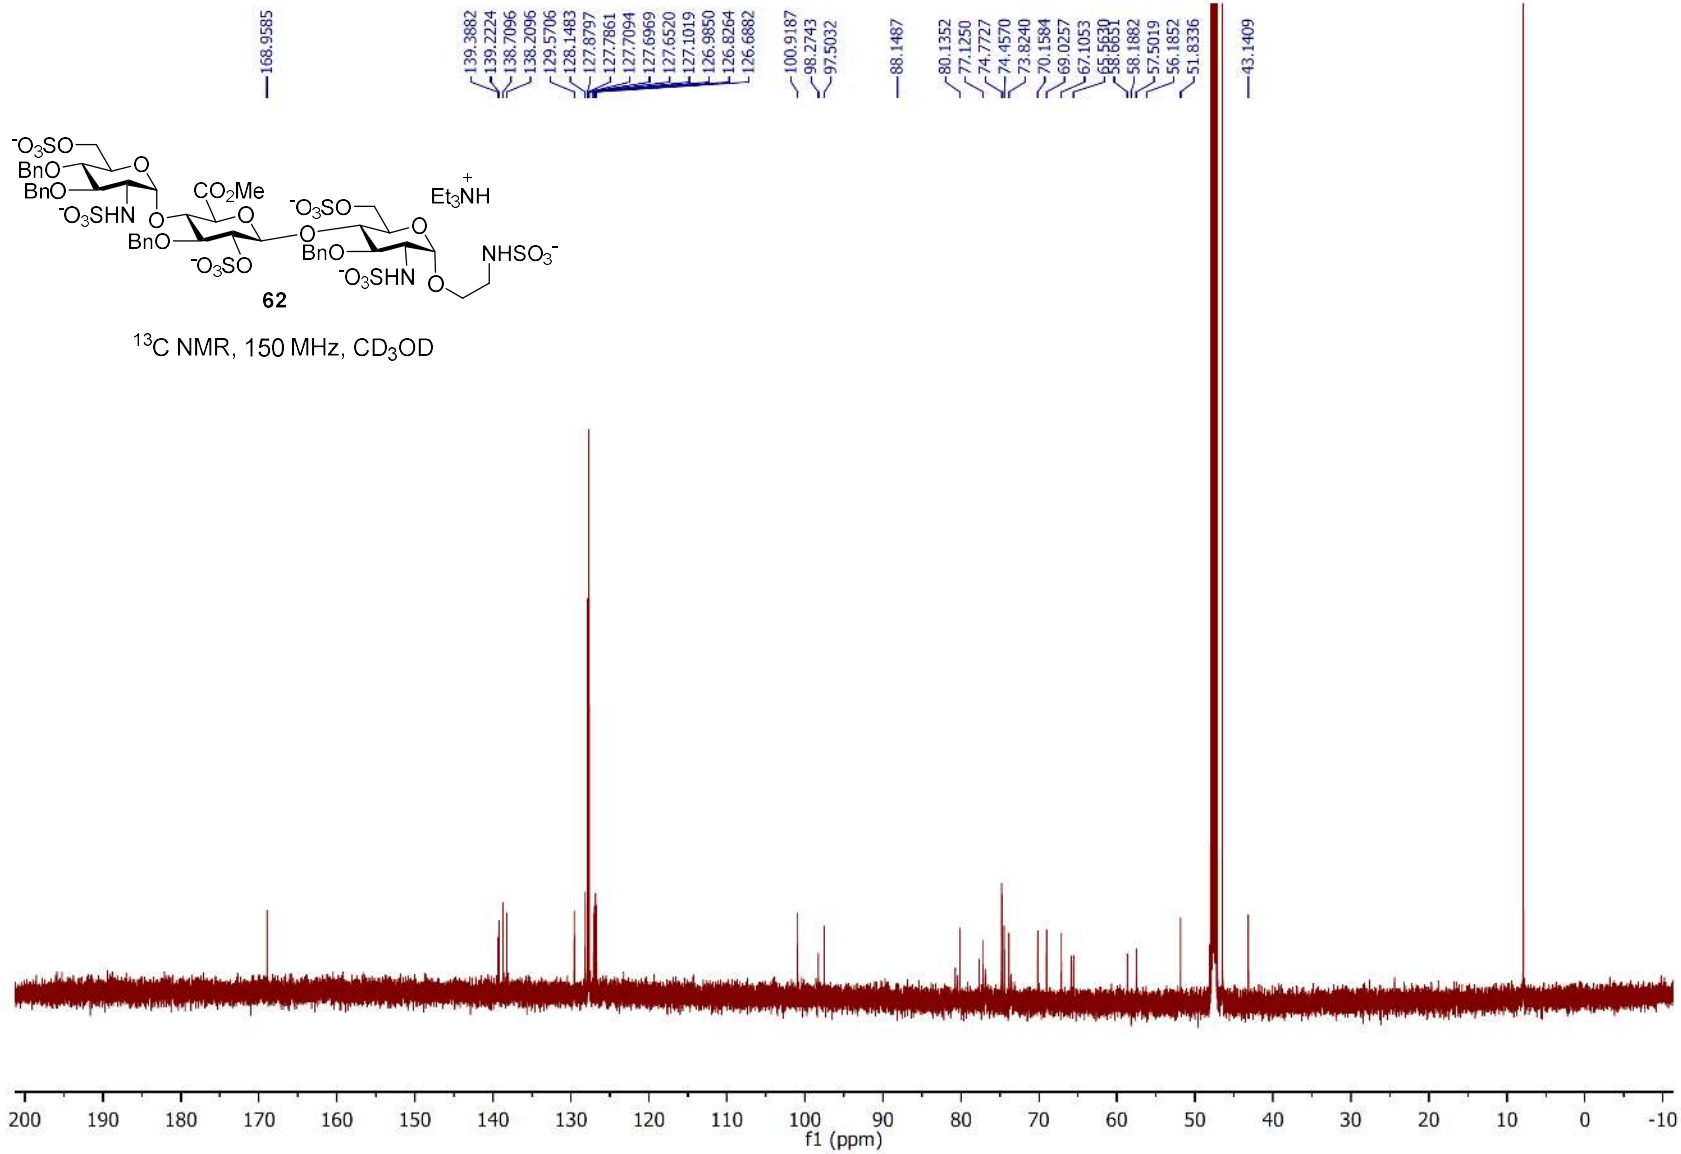



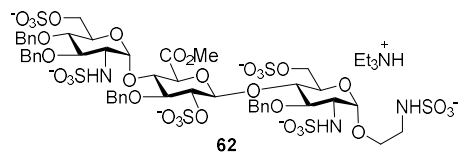

$^1\text{H}$ - $^{13}\text{C}$  HSQC, 600/150MHz,  $\text{CD}_3\text{OD}$

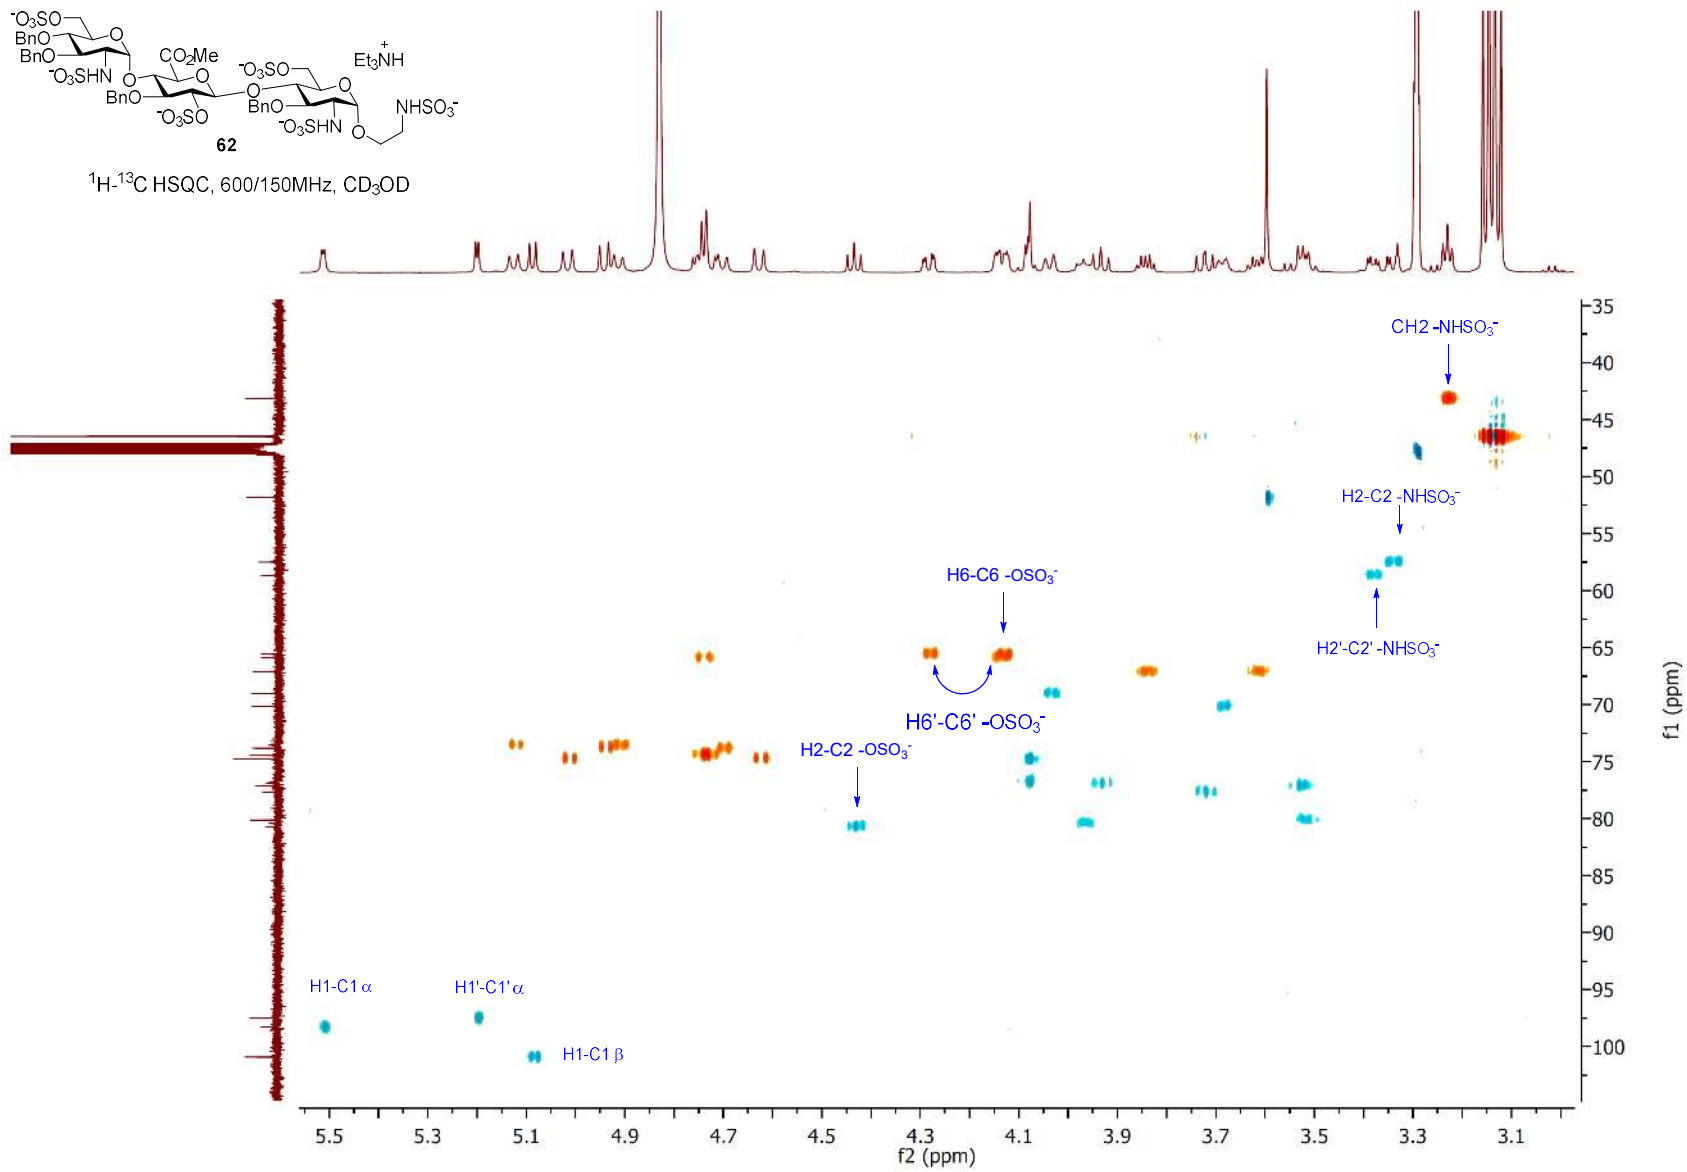

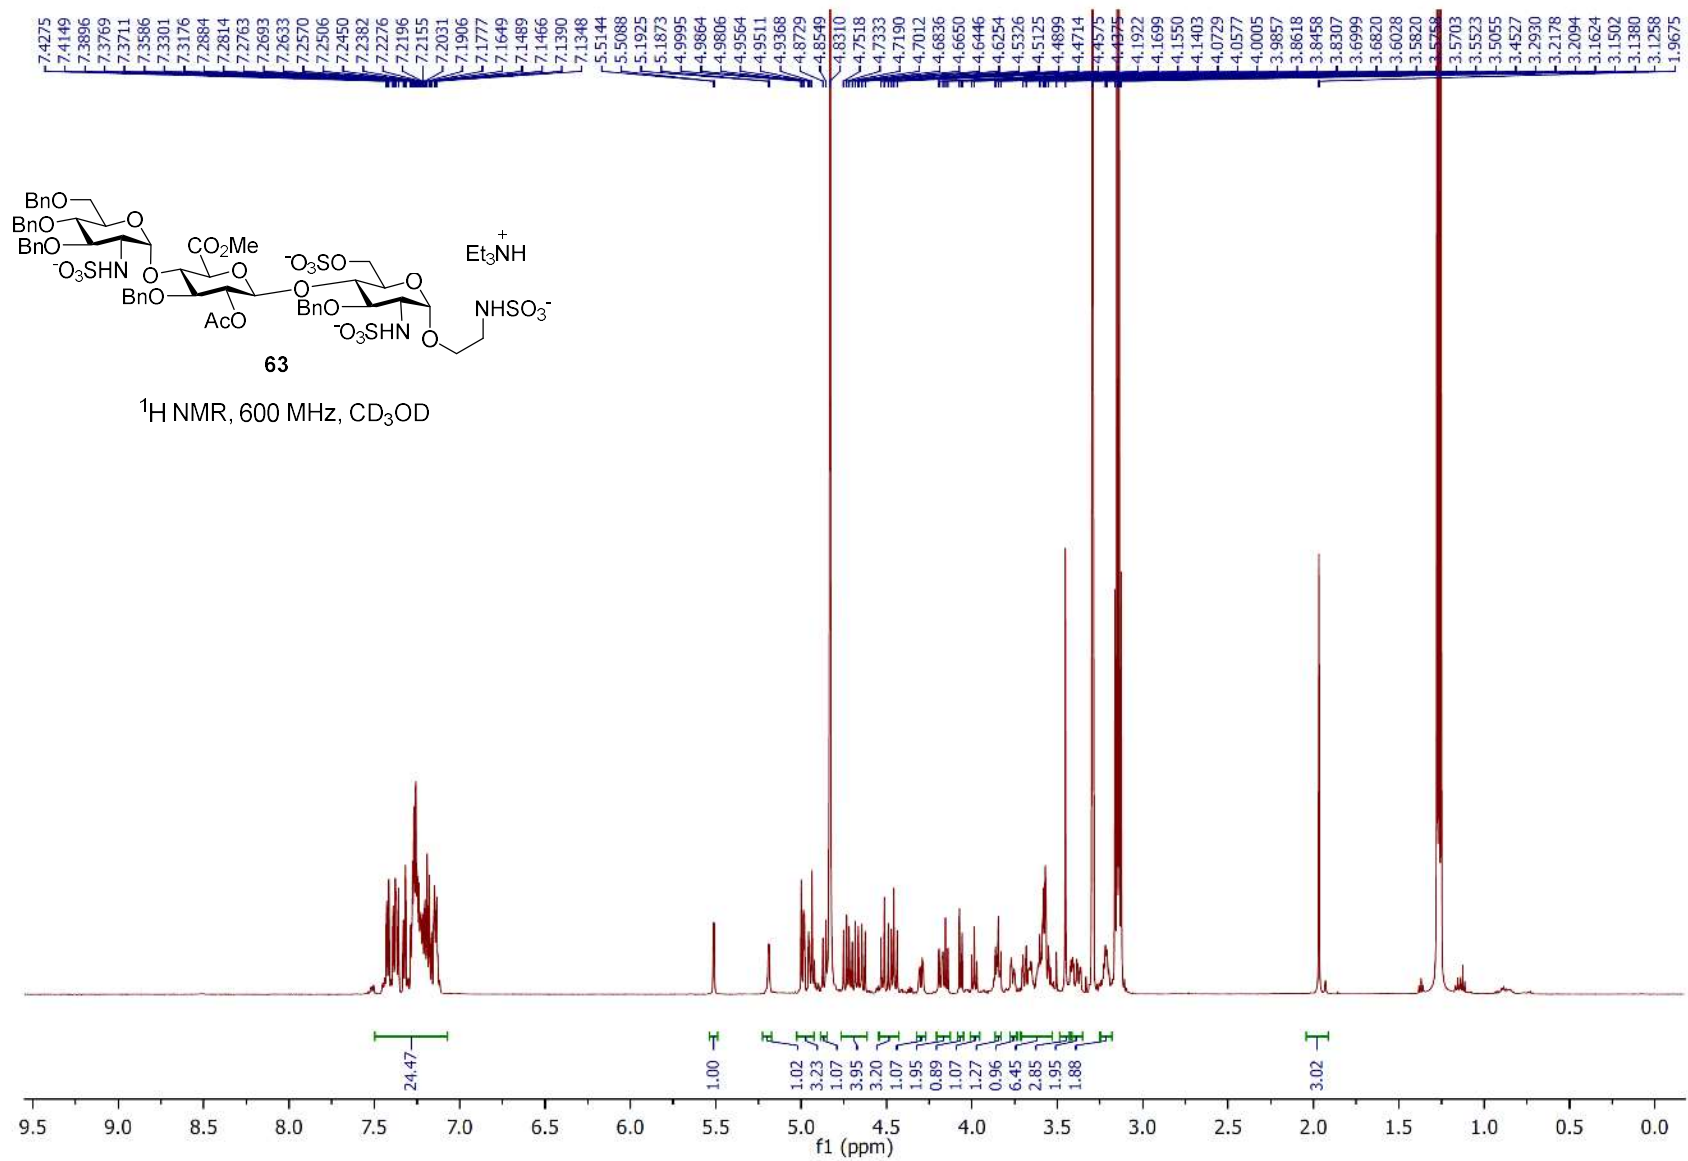

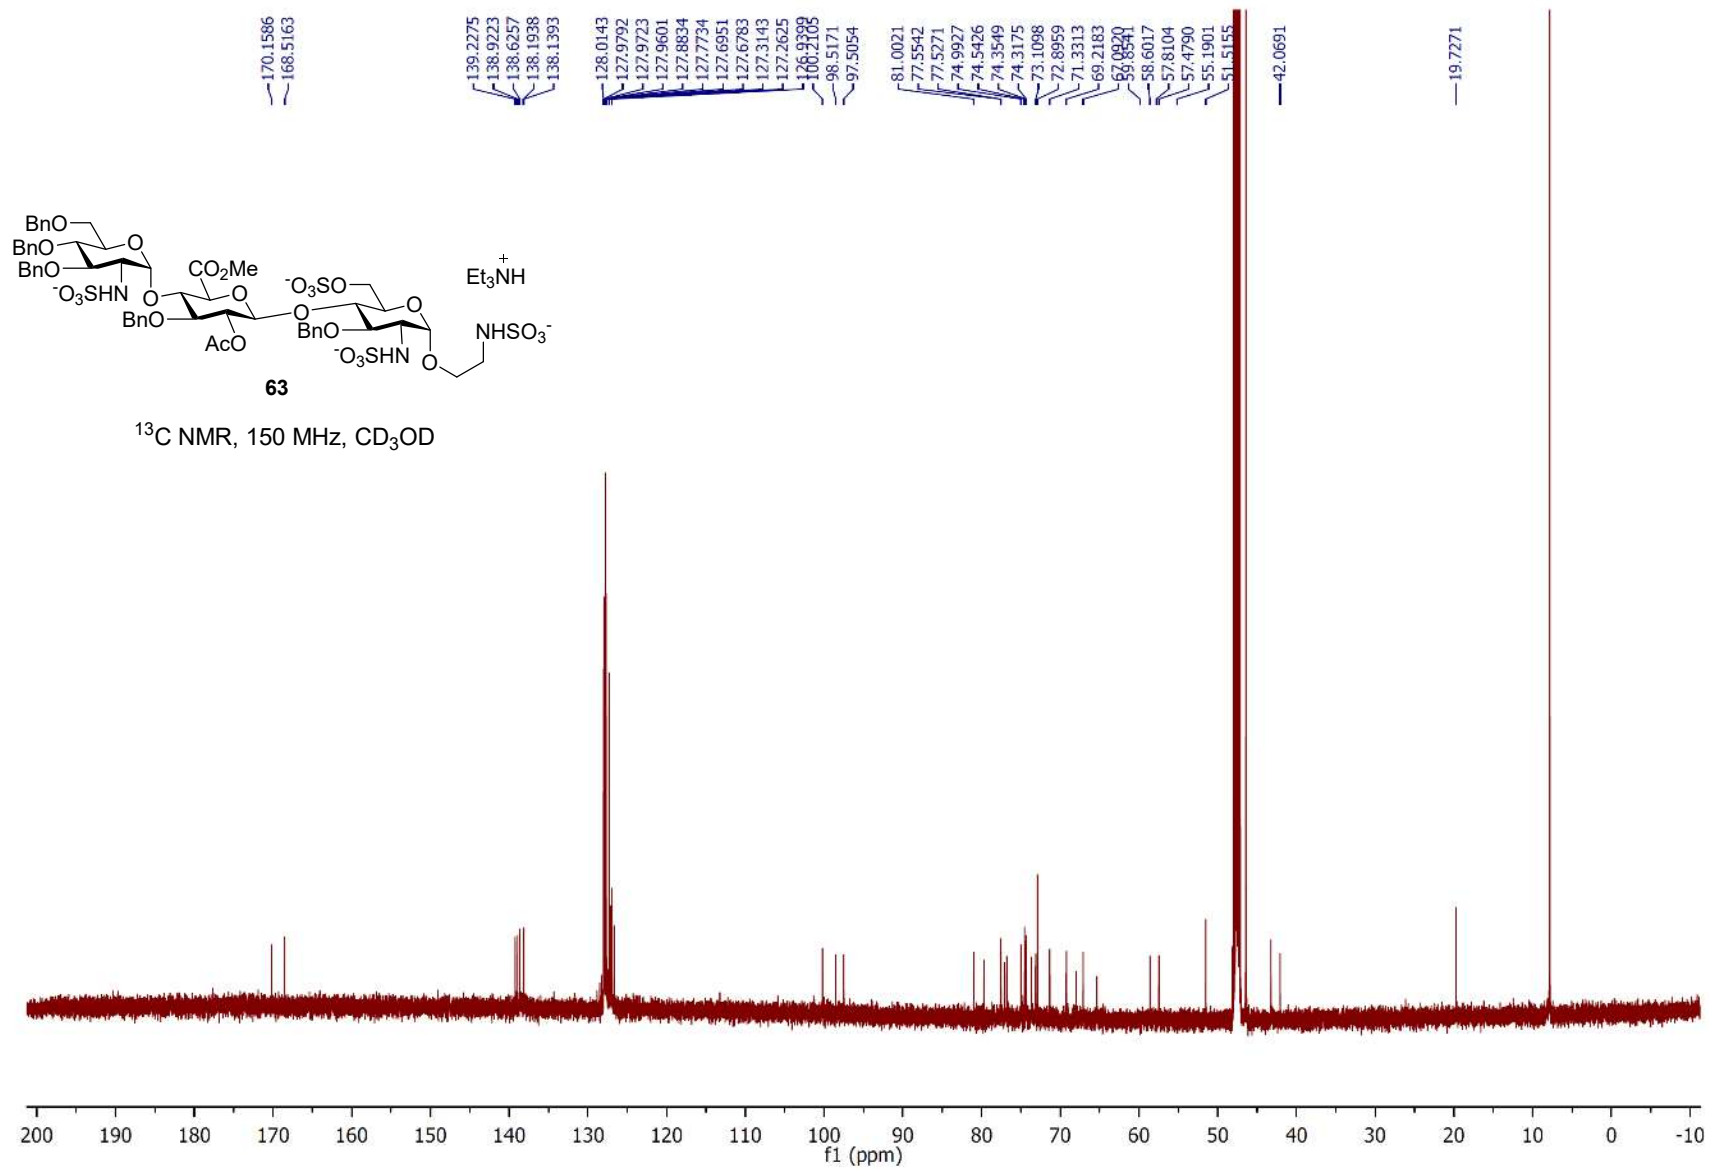

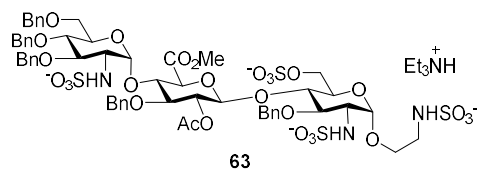

$^1\text{H}$ - $^1\text{H}$  COSY, 600 MHz,  $\text{CD}_3\text{OD}$

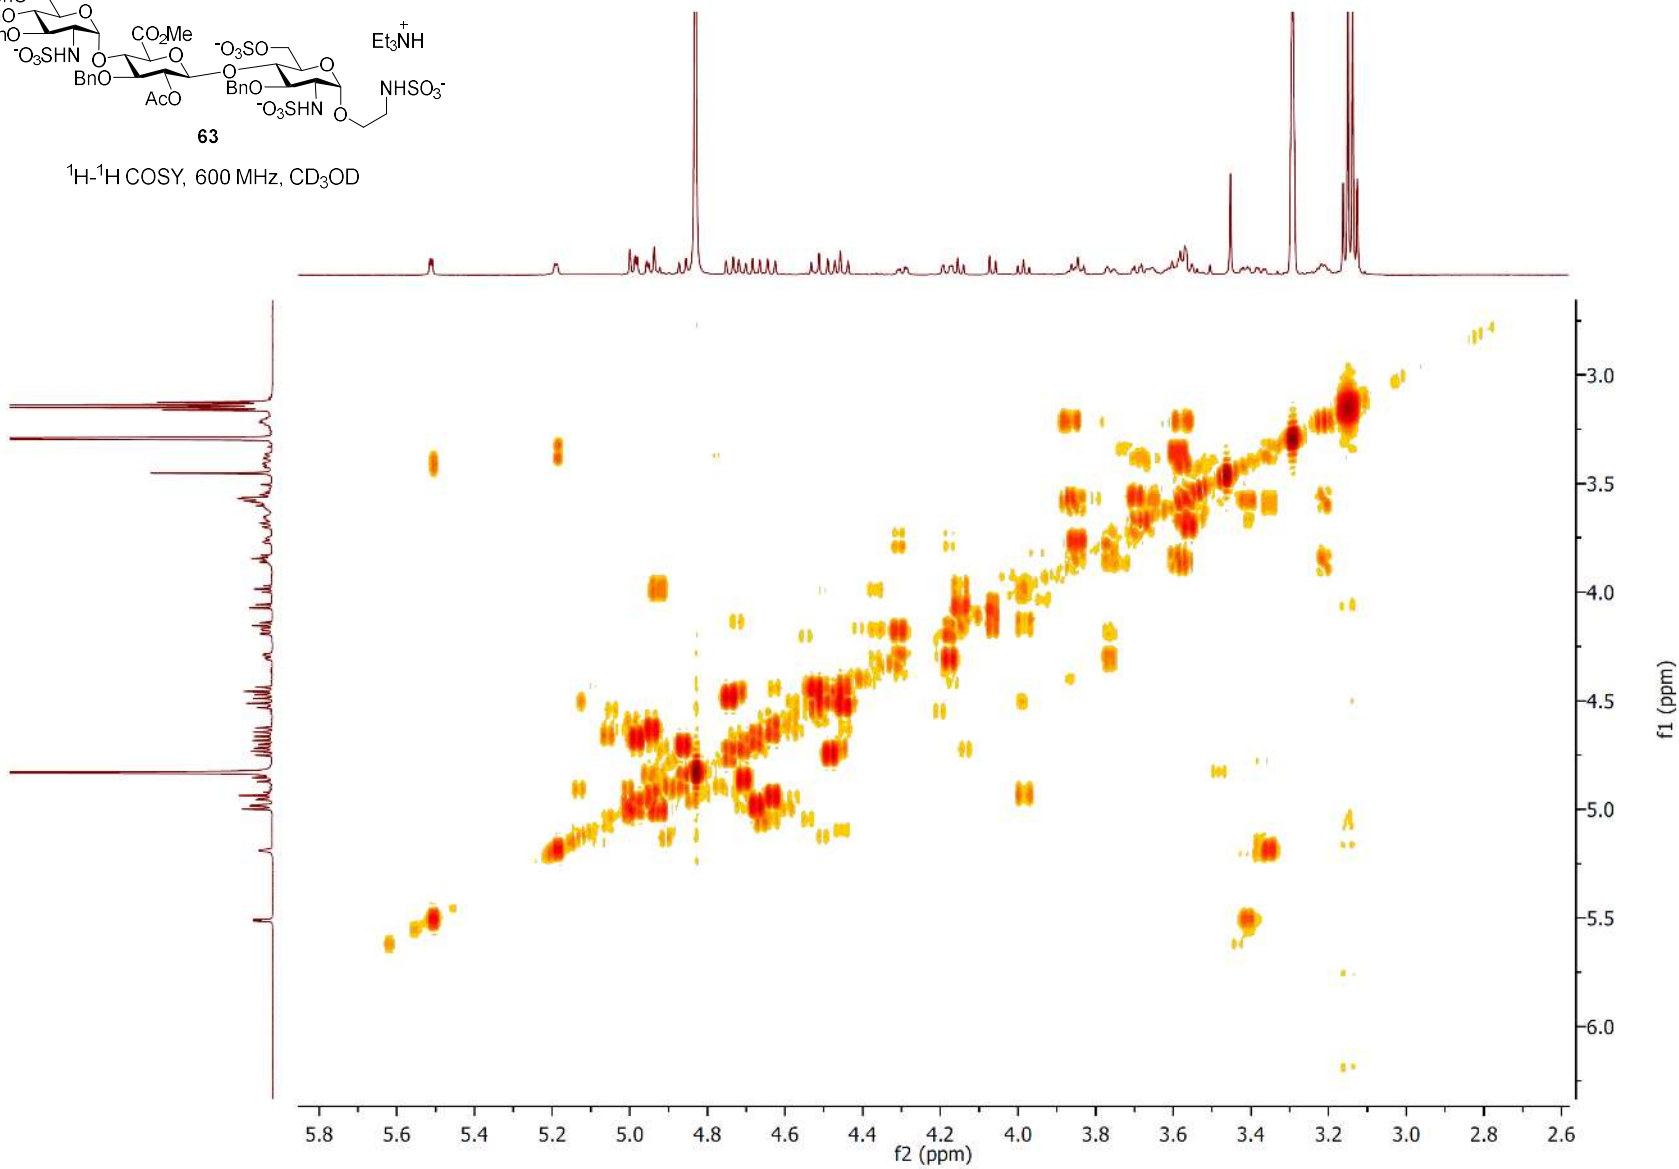

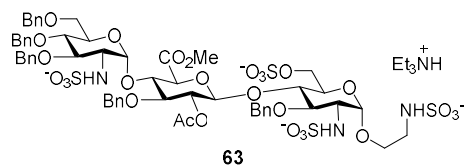

$^1\text{H}$ - $^{13}\text{C}$  HSQC, 600/150MHz,  $\text{CD}_3\text{OD}$

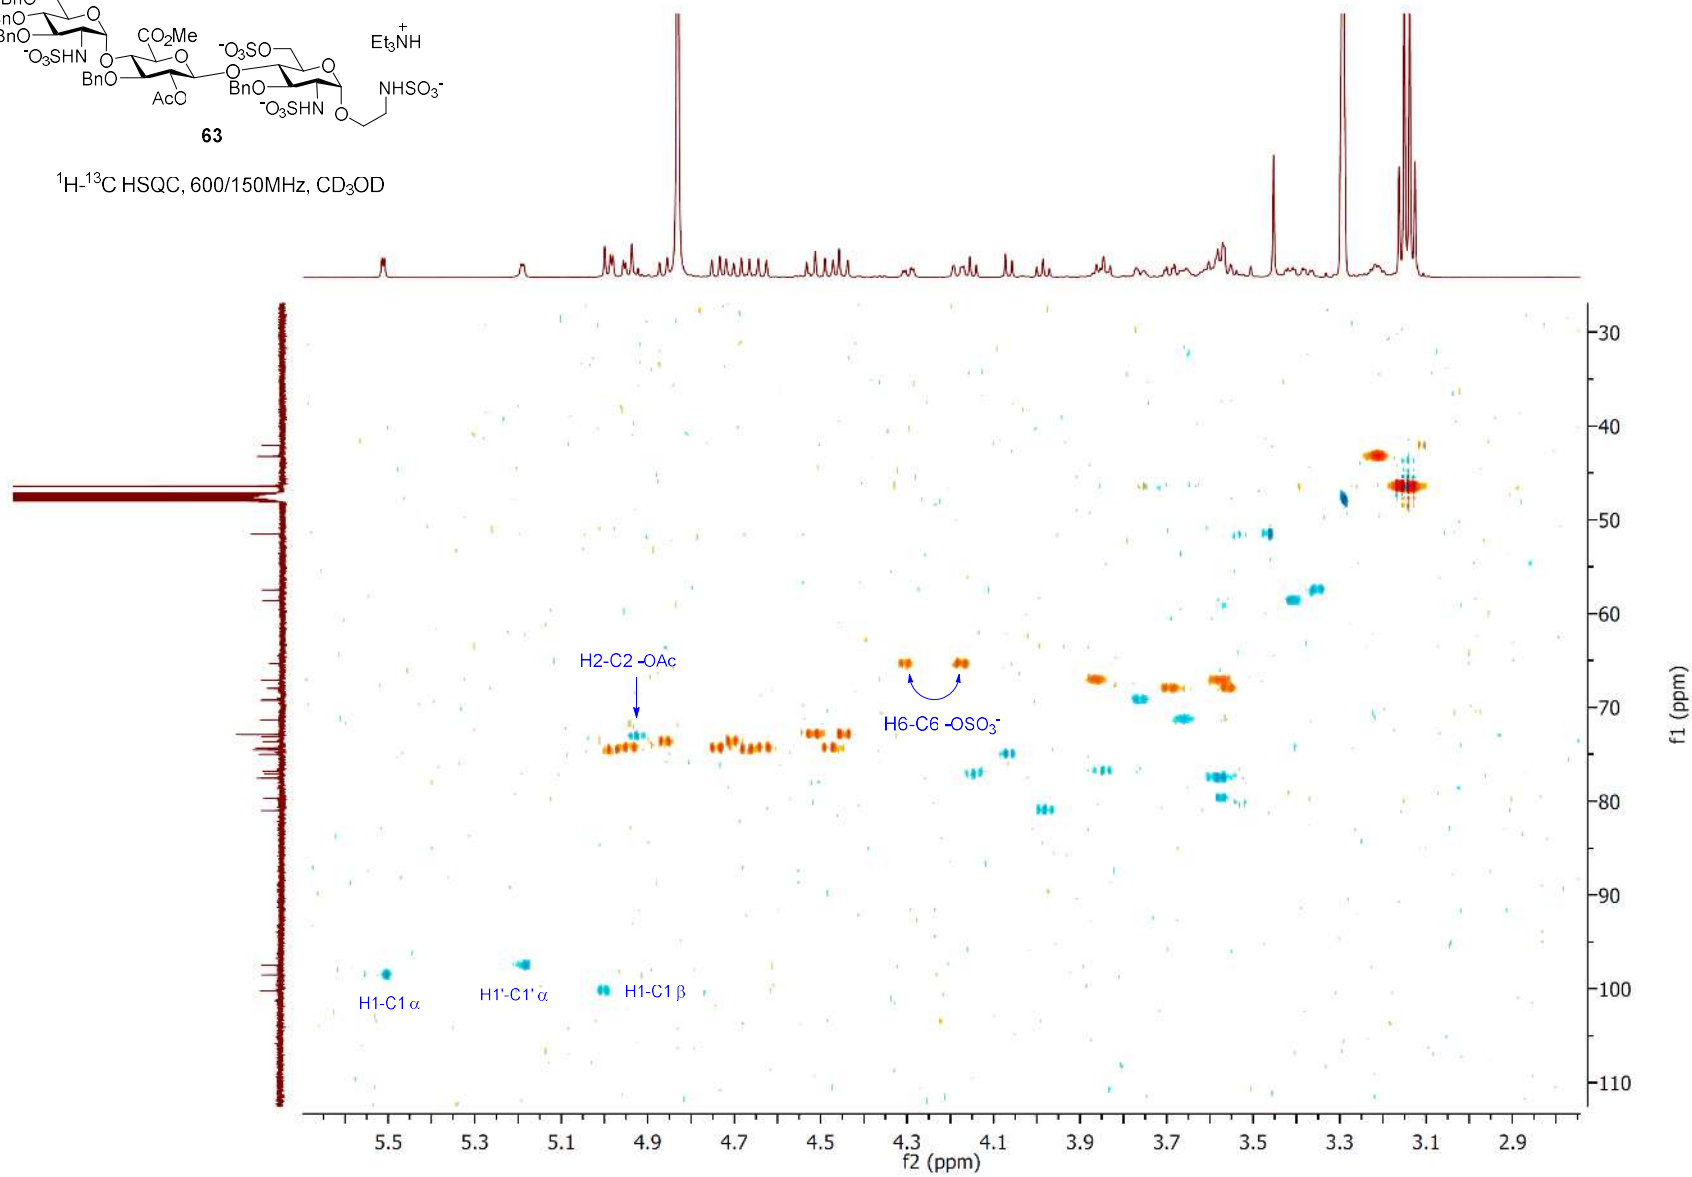

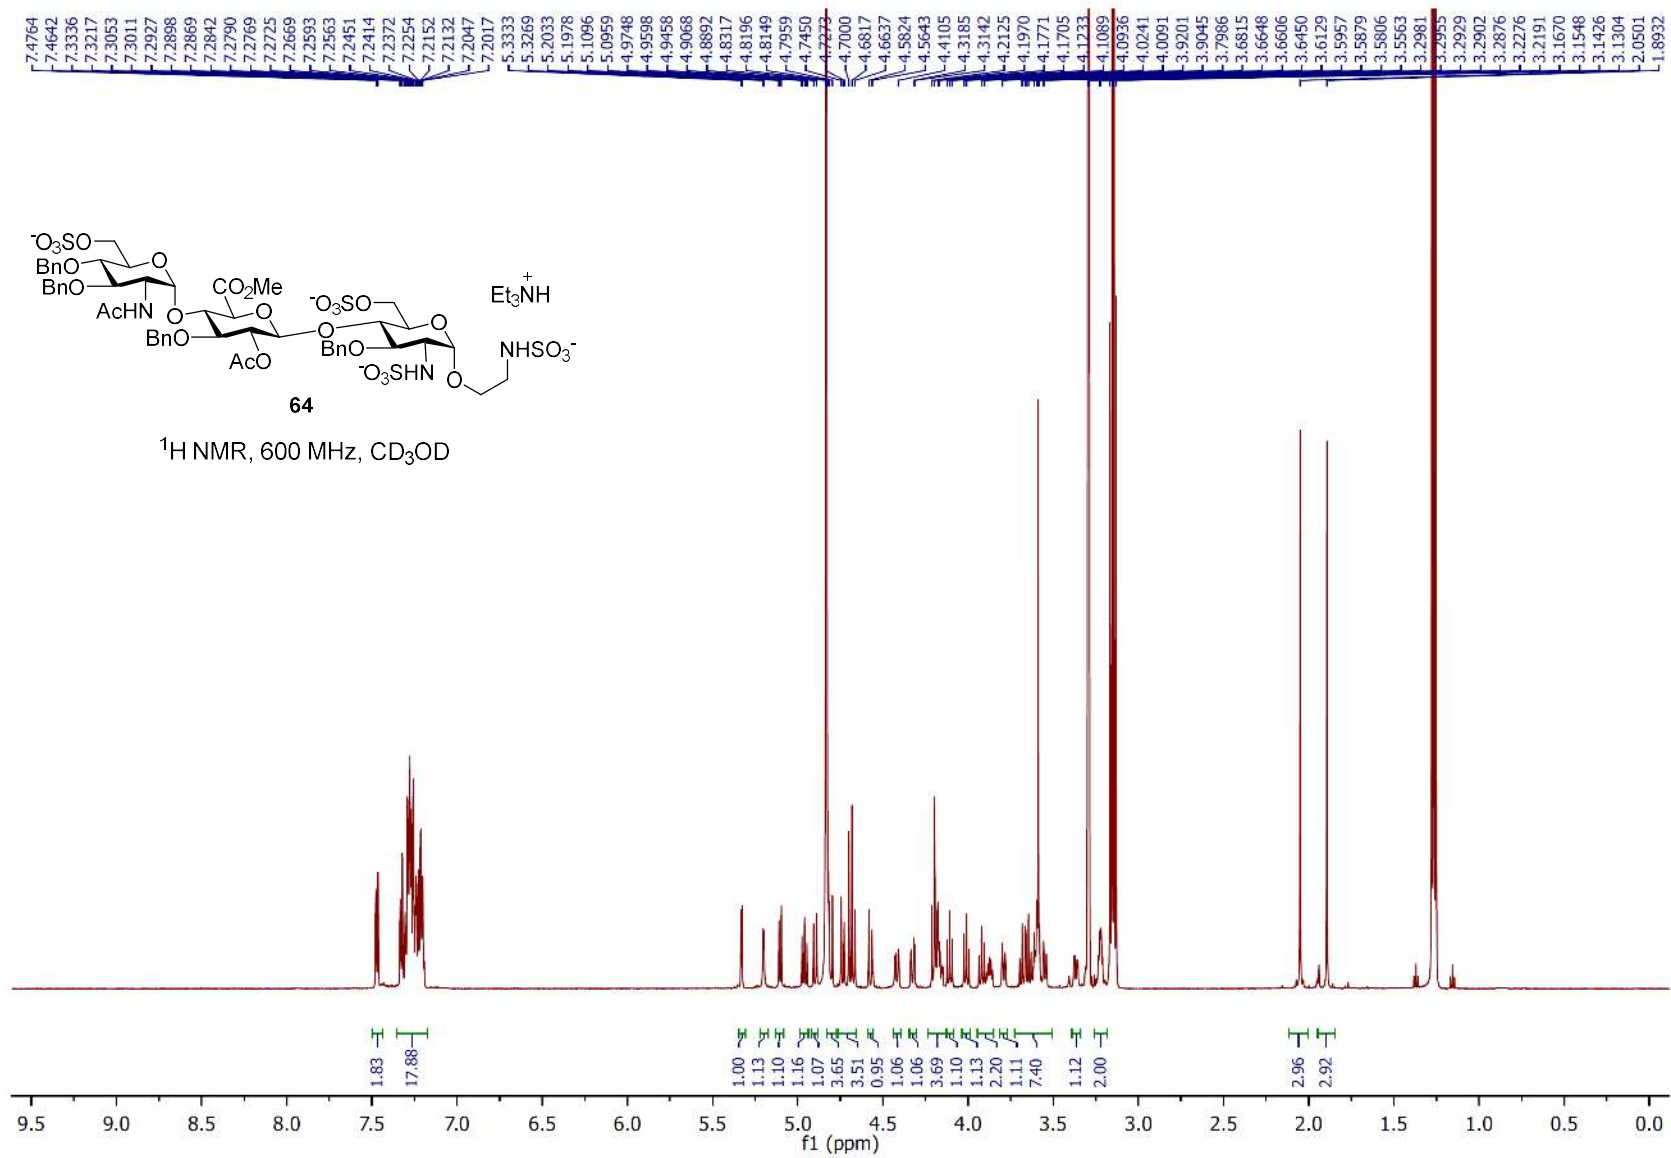

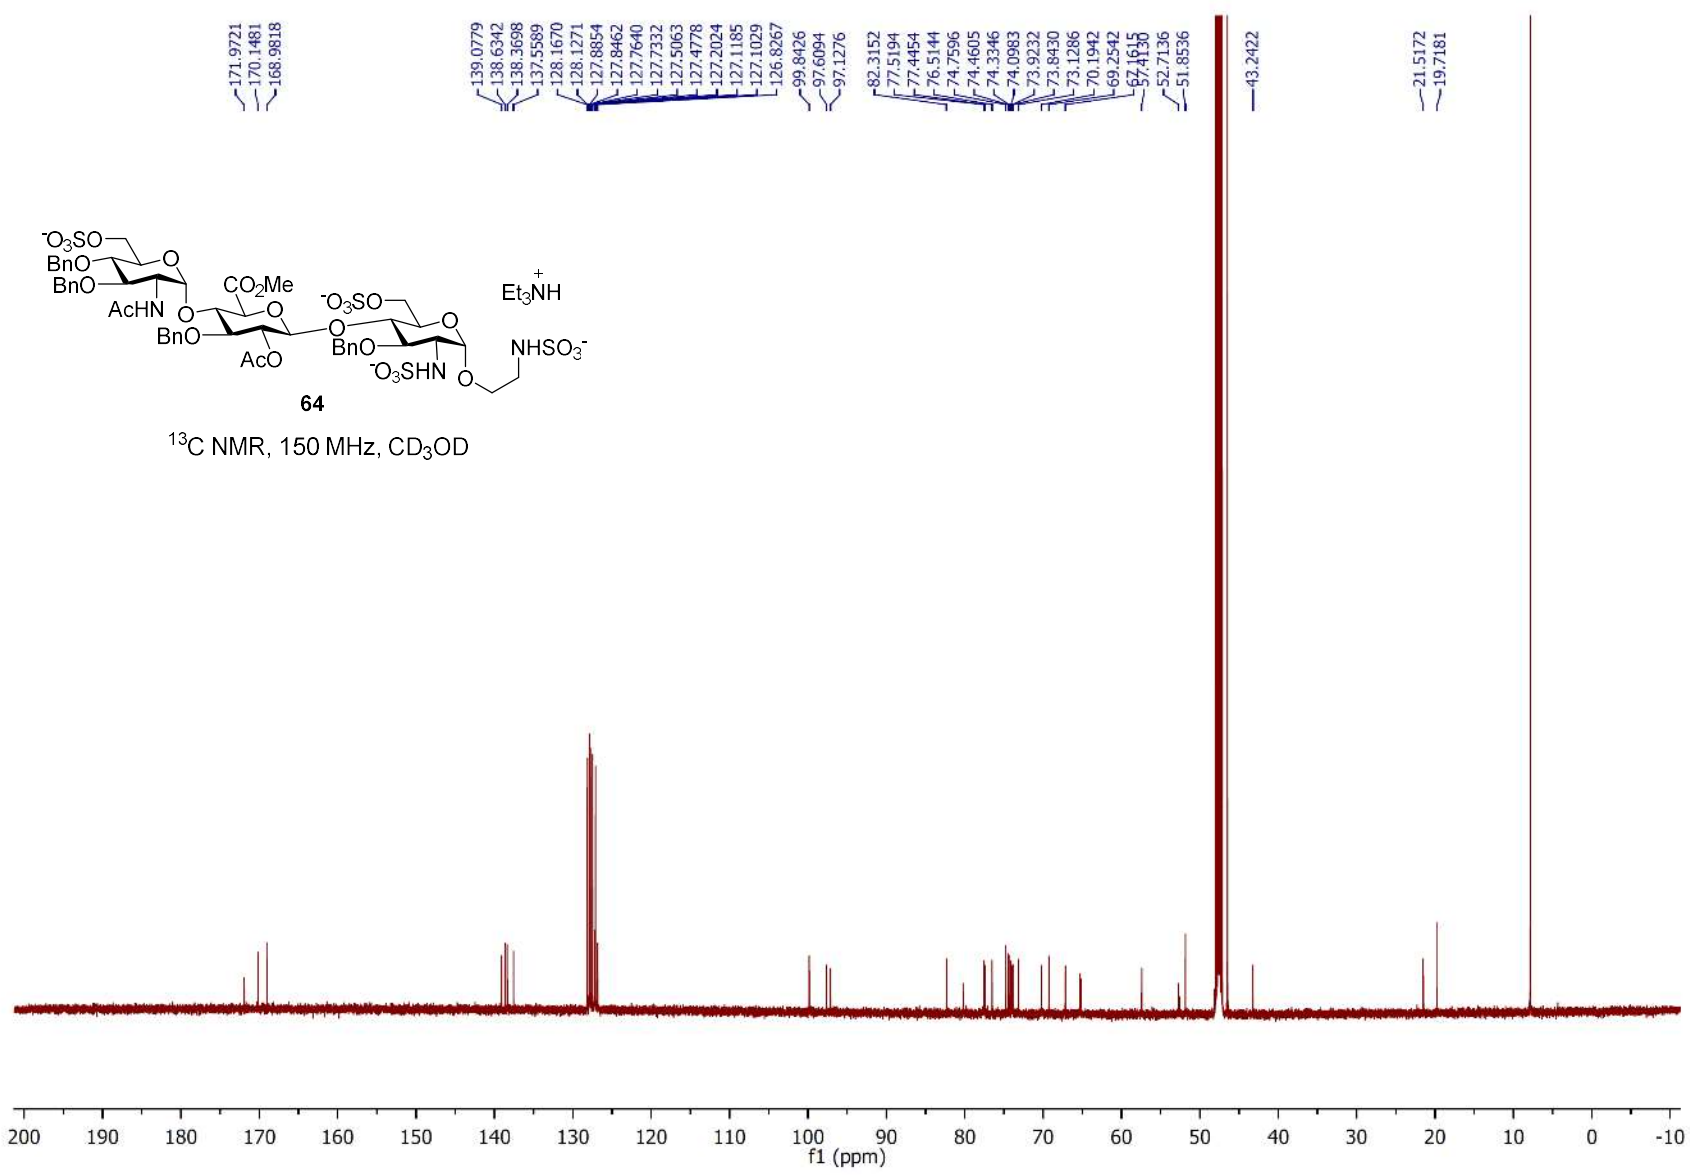

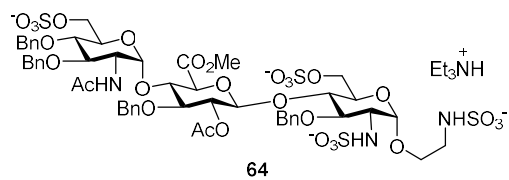

$^1\text{H}$ - $^1\text{H}$  COSY, 600 MHz,  $\text{CD}_3\text{OD}$

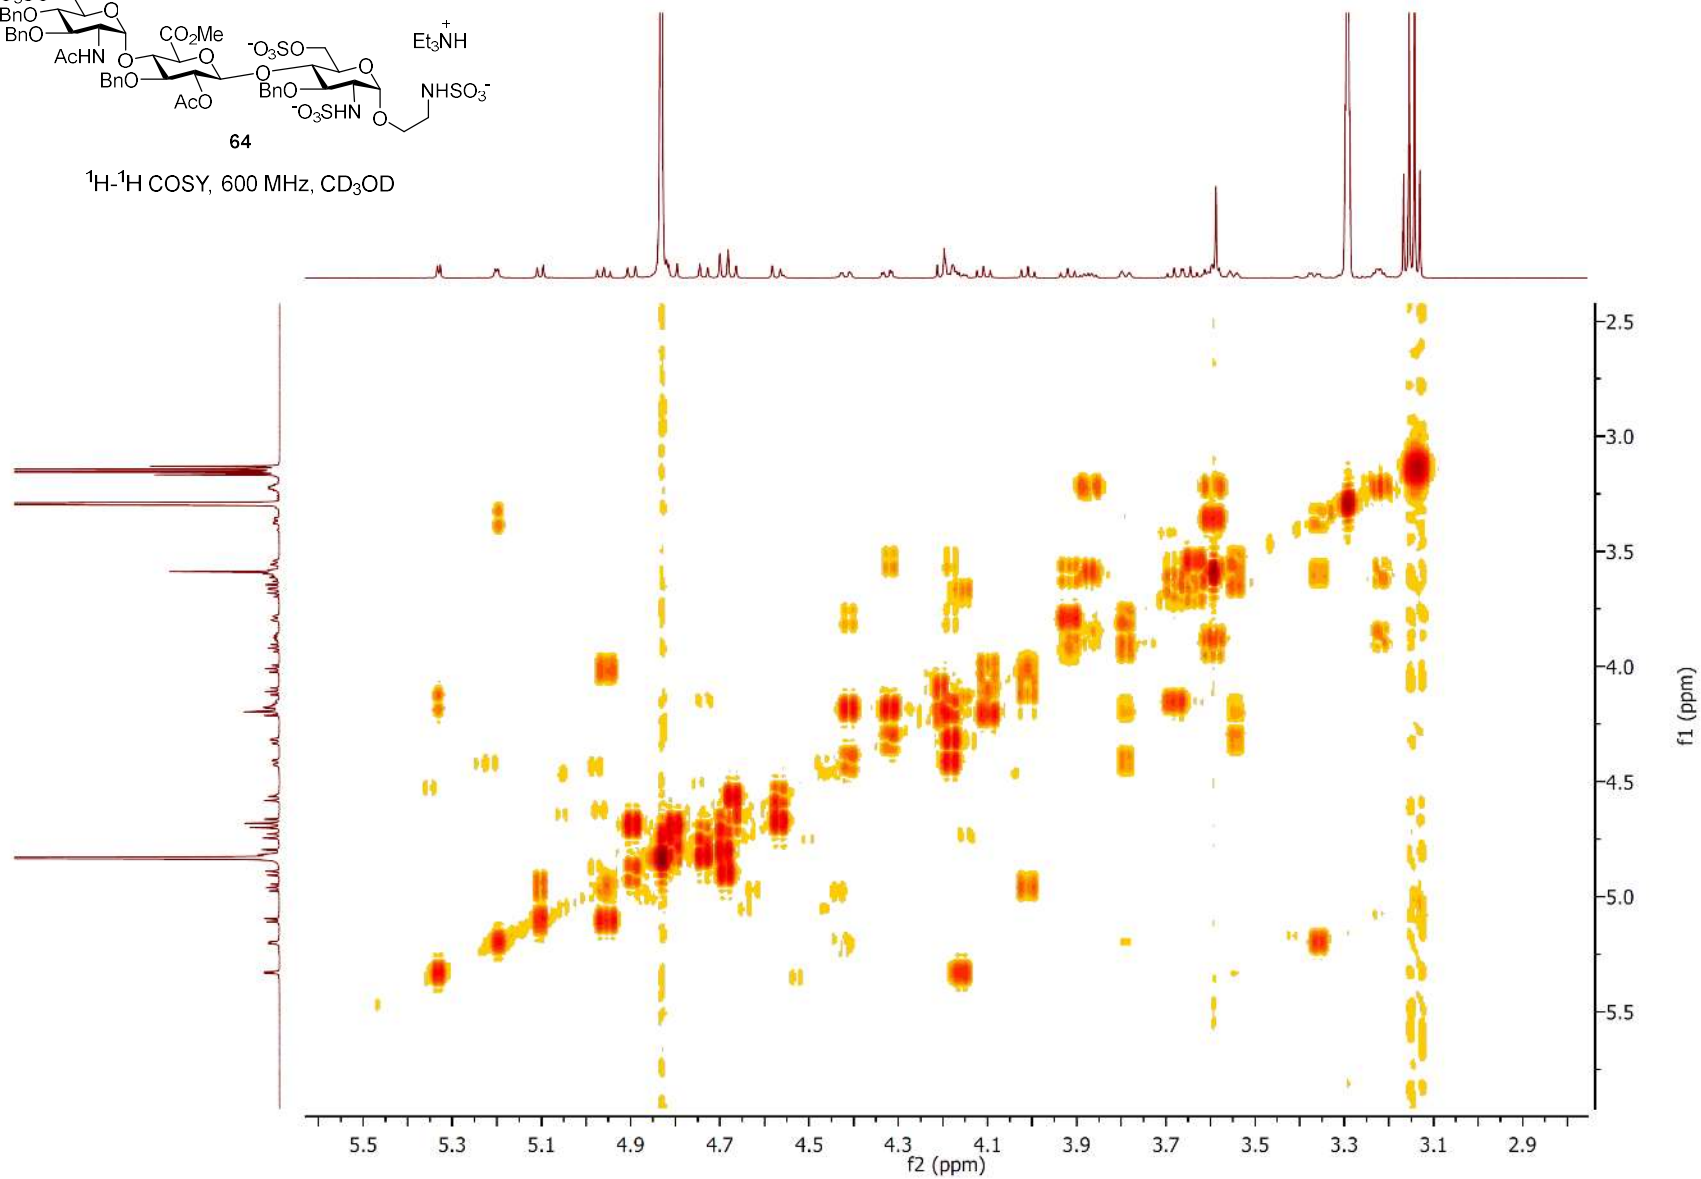



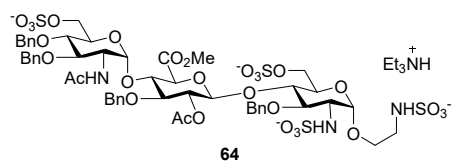

$^1\text{H}$ - $^{13}\text{C}$  HSQC, 600/150MHz,  $\text{CD}_3\text{OD}$

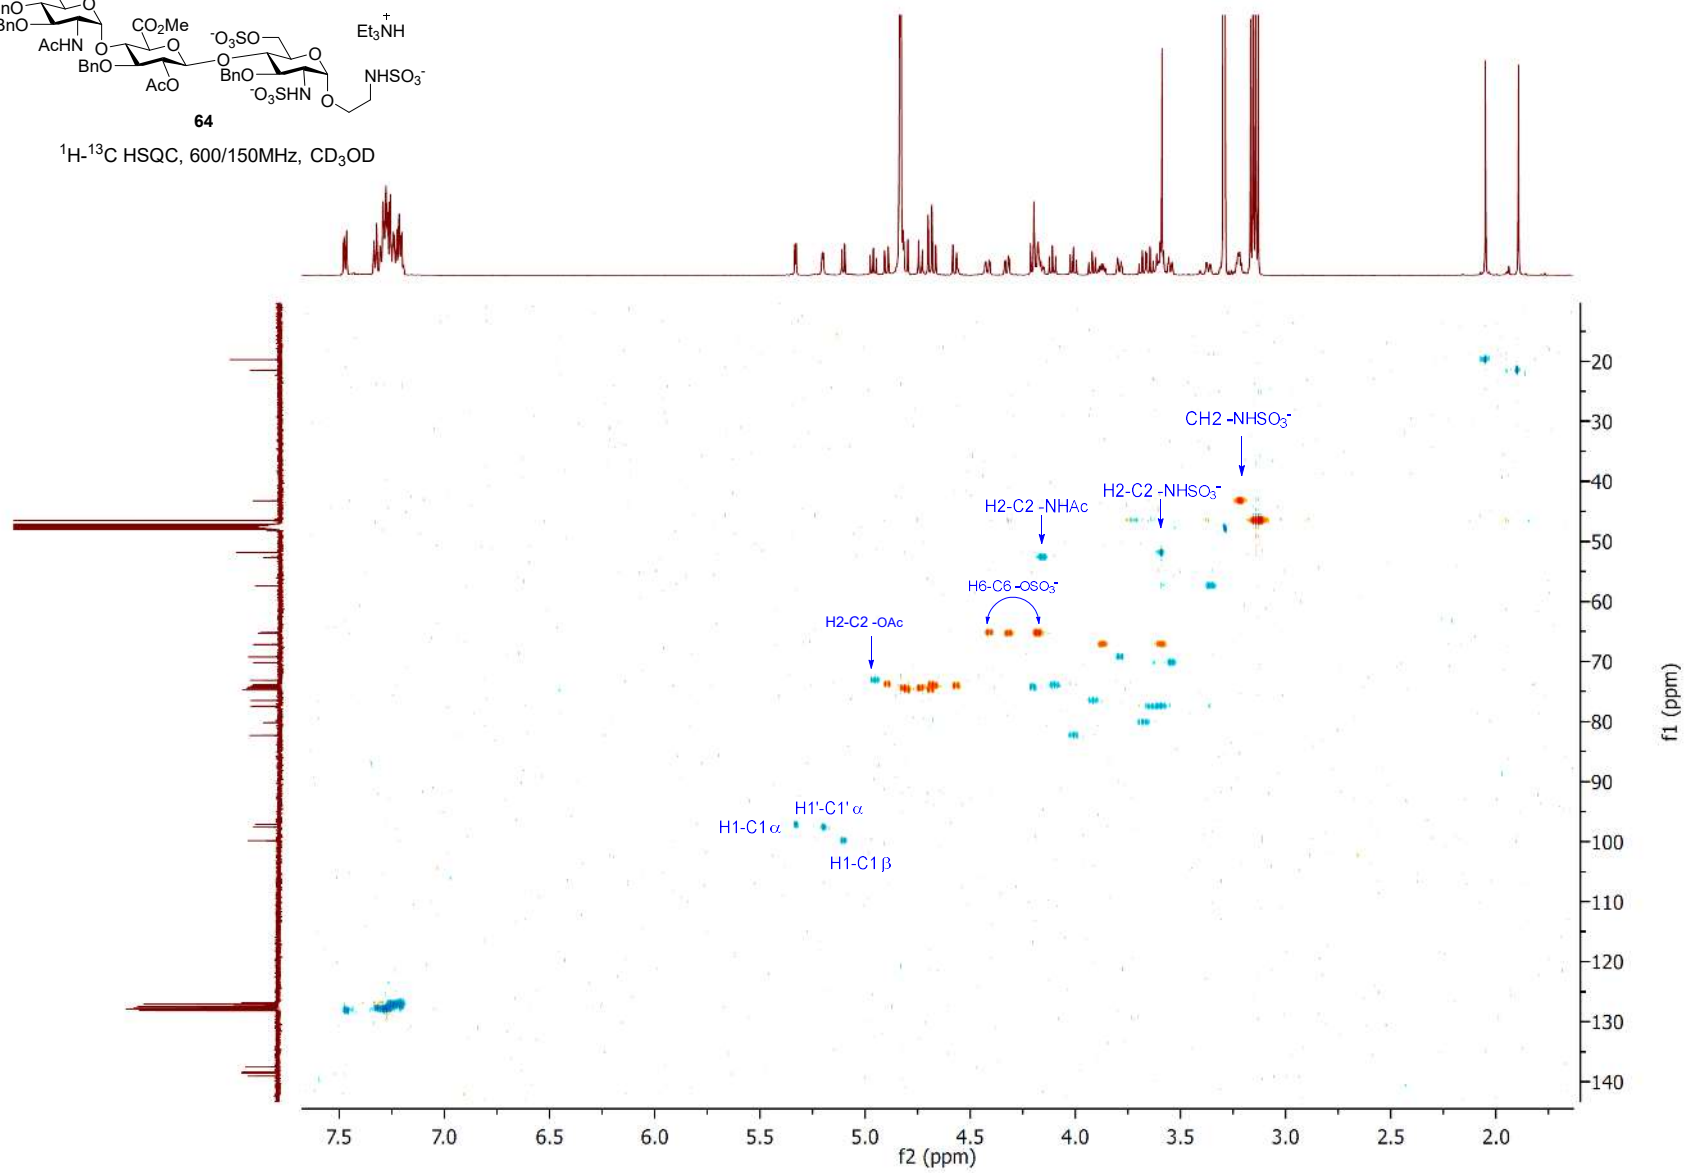

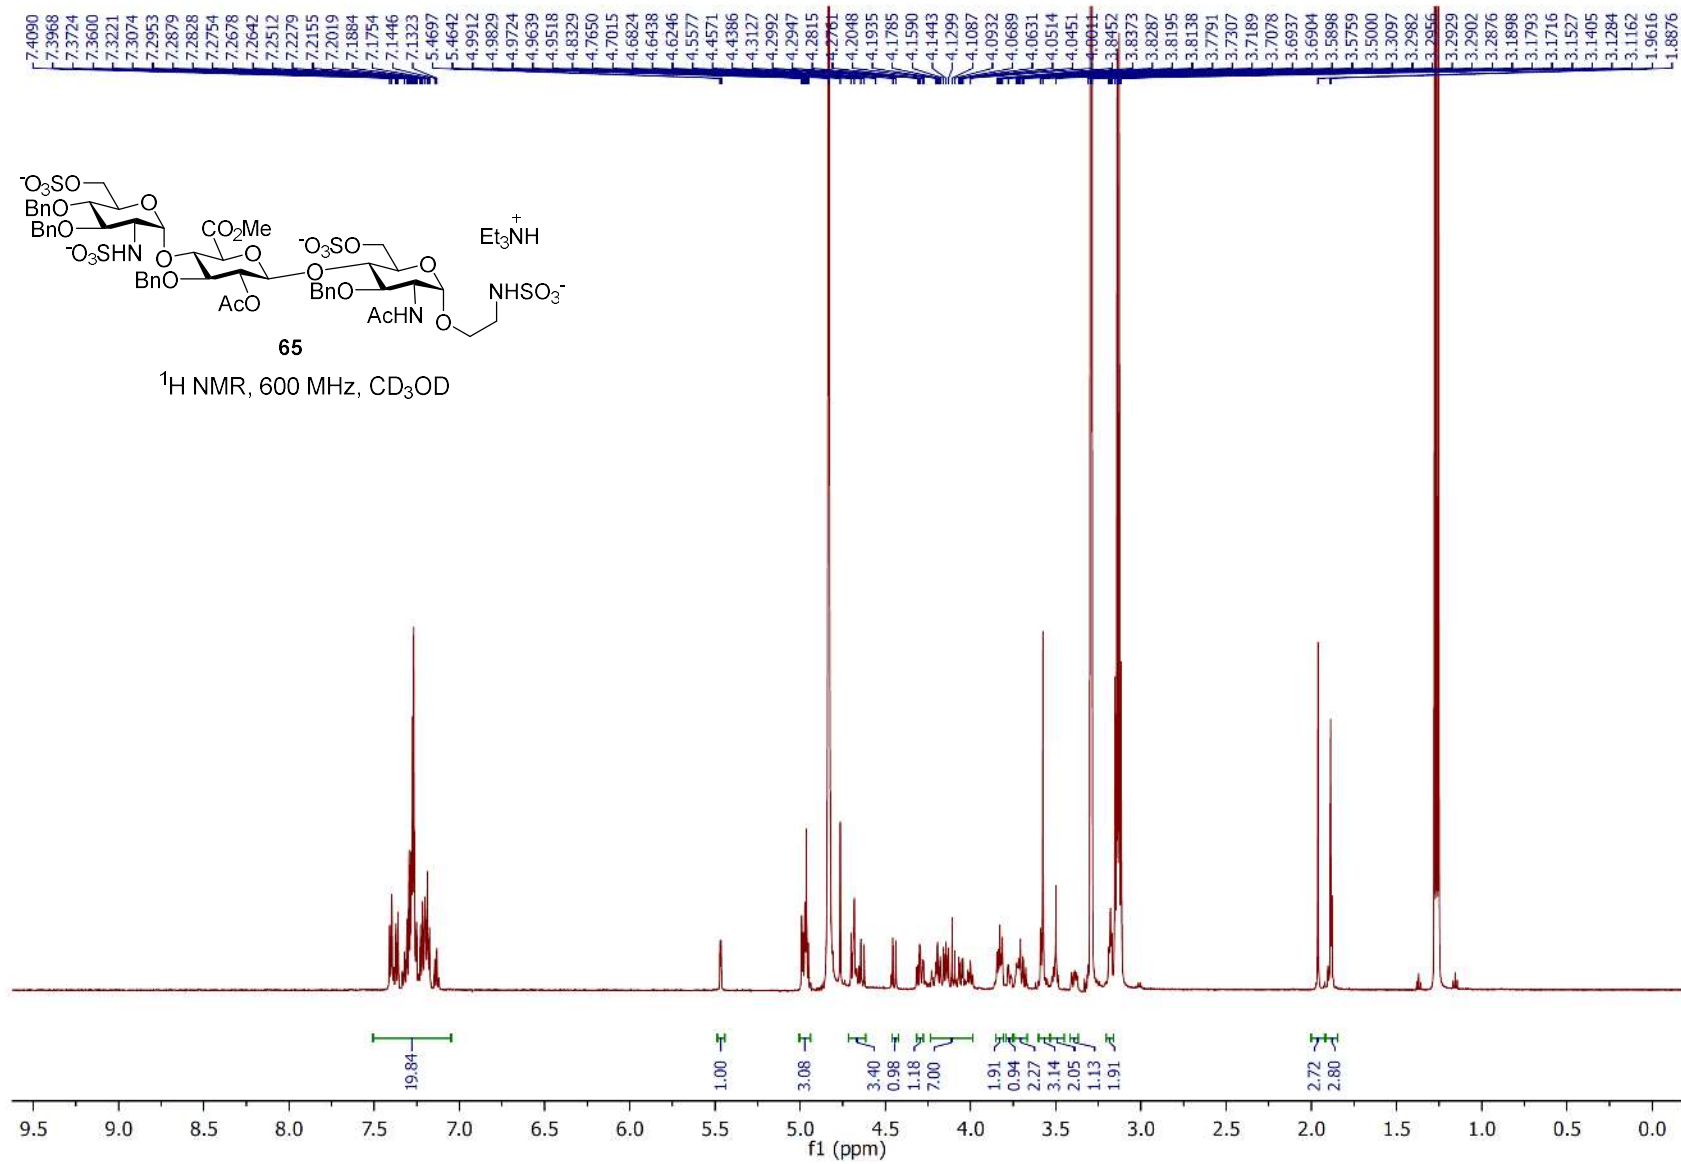

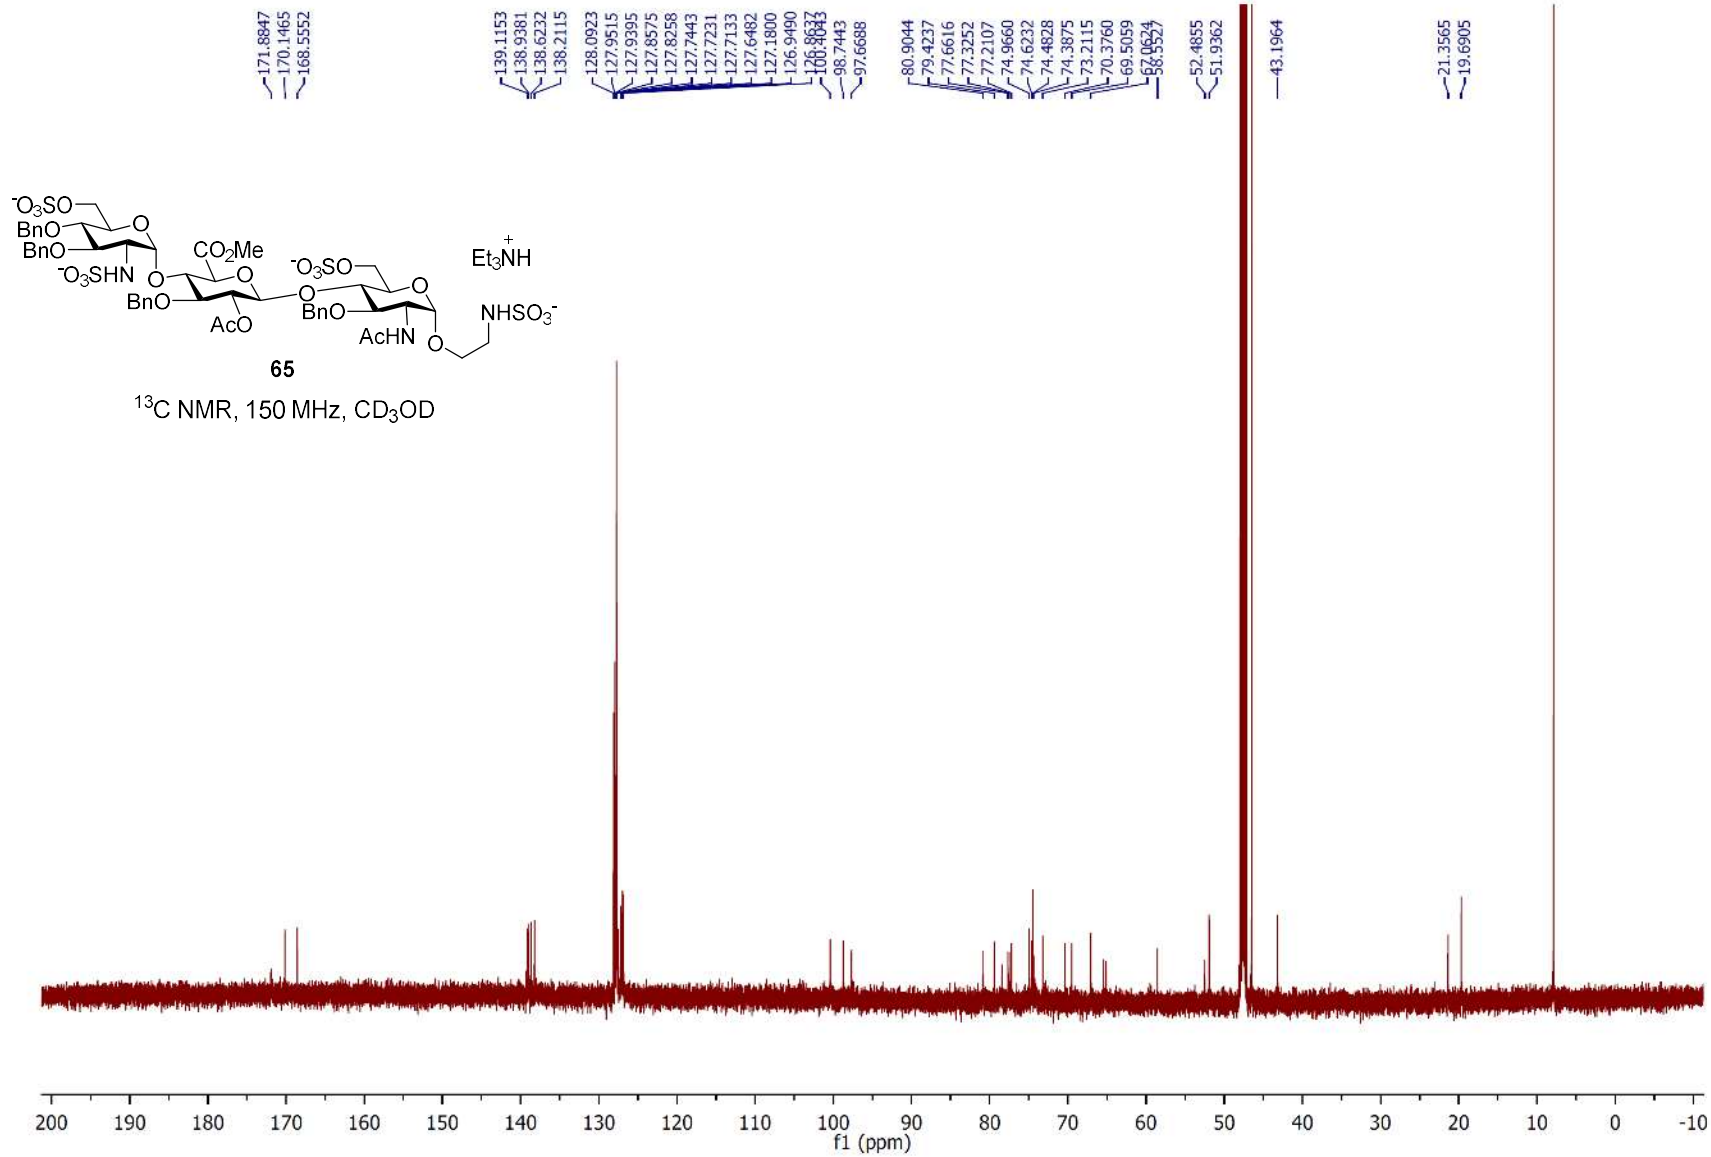

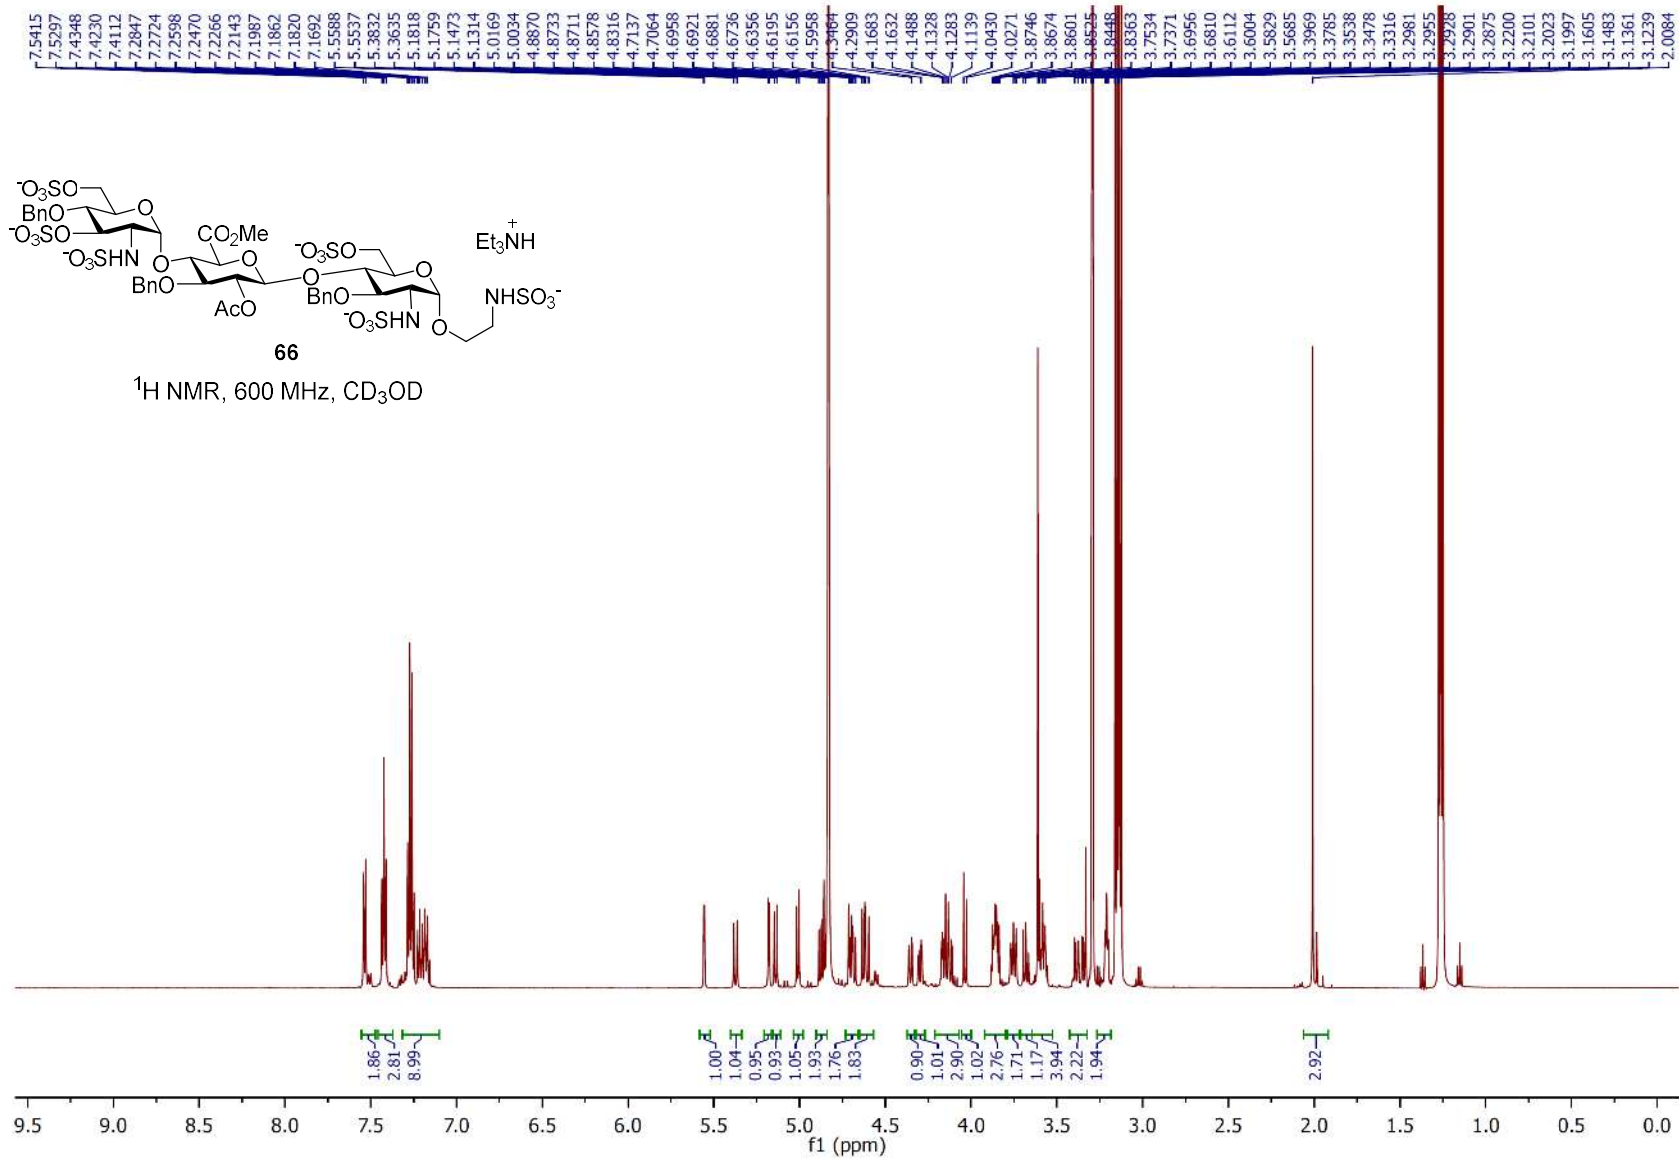

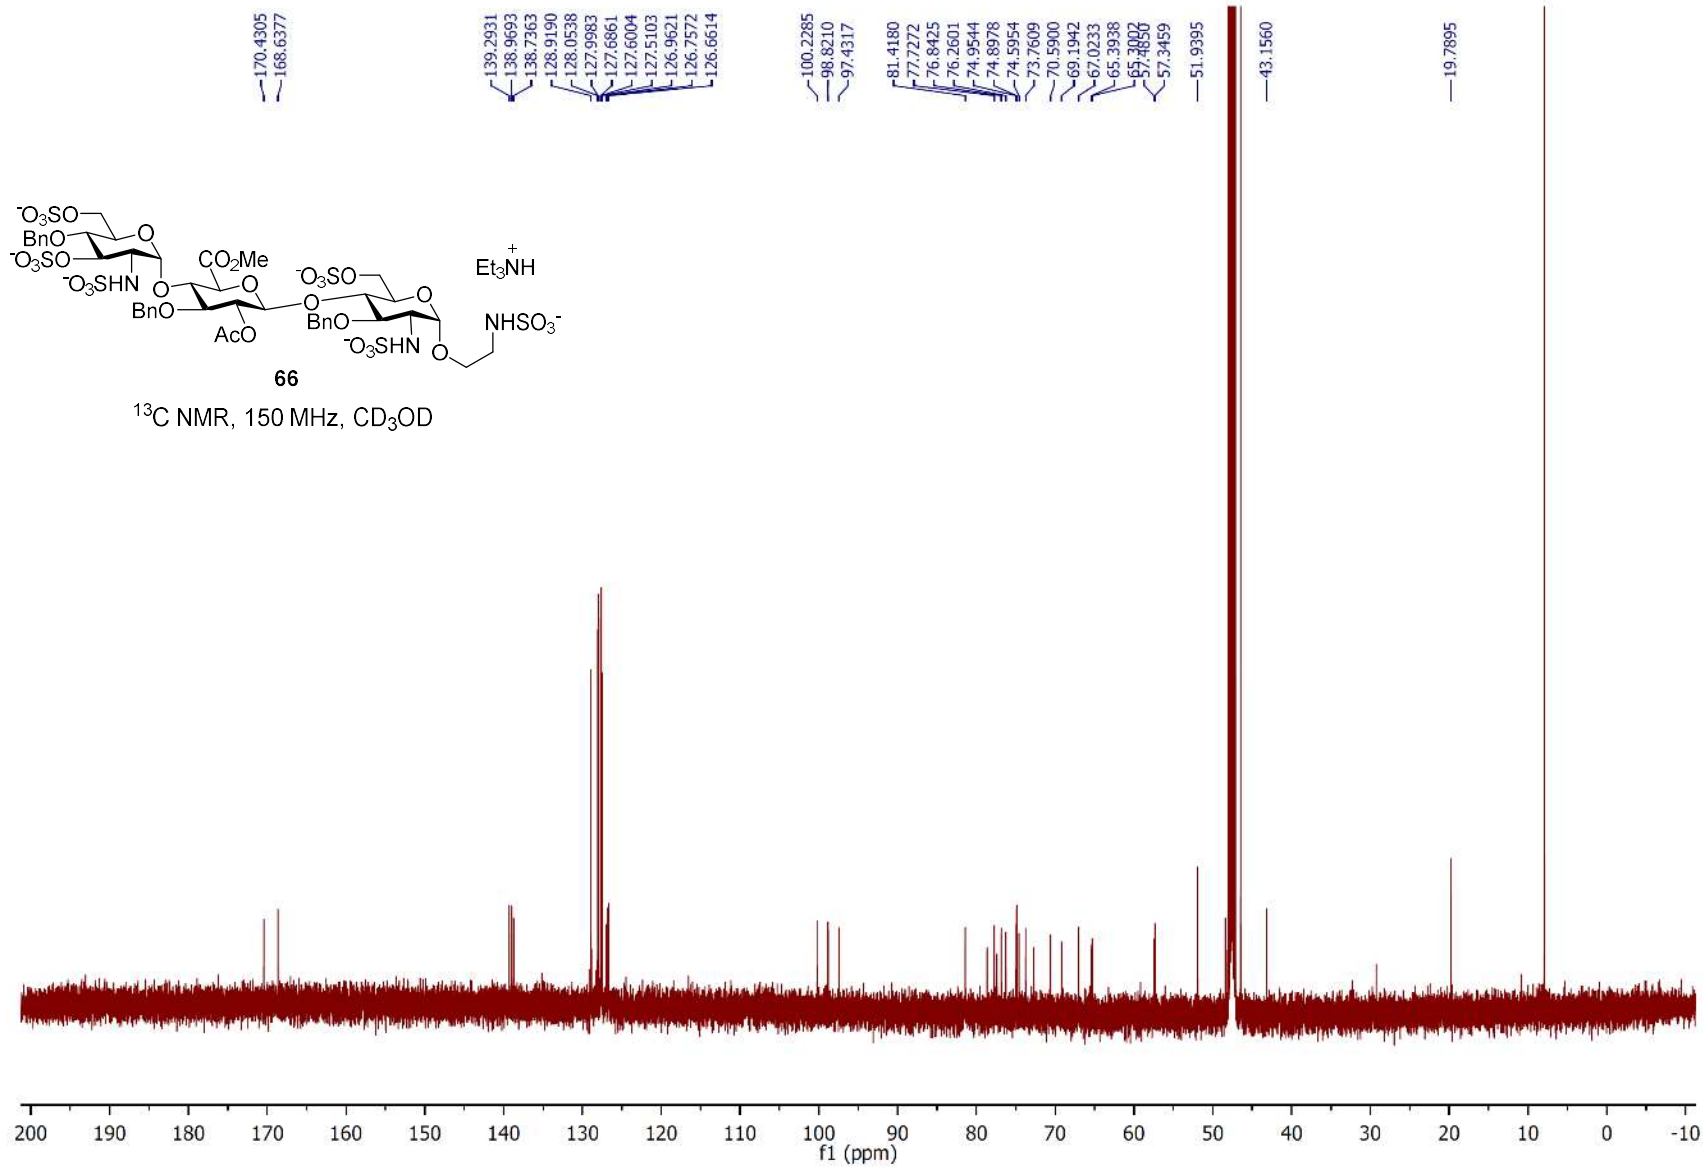

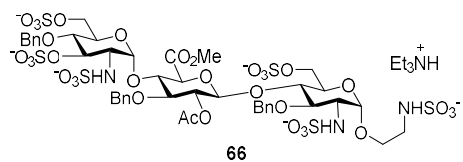

$^1\text{H}$ - $^{13}\text{C}$  HSQC, 600/150MHz,  $\text{CD}_3\text{OD}$

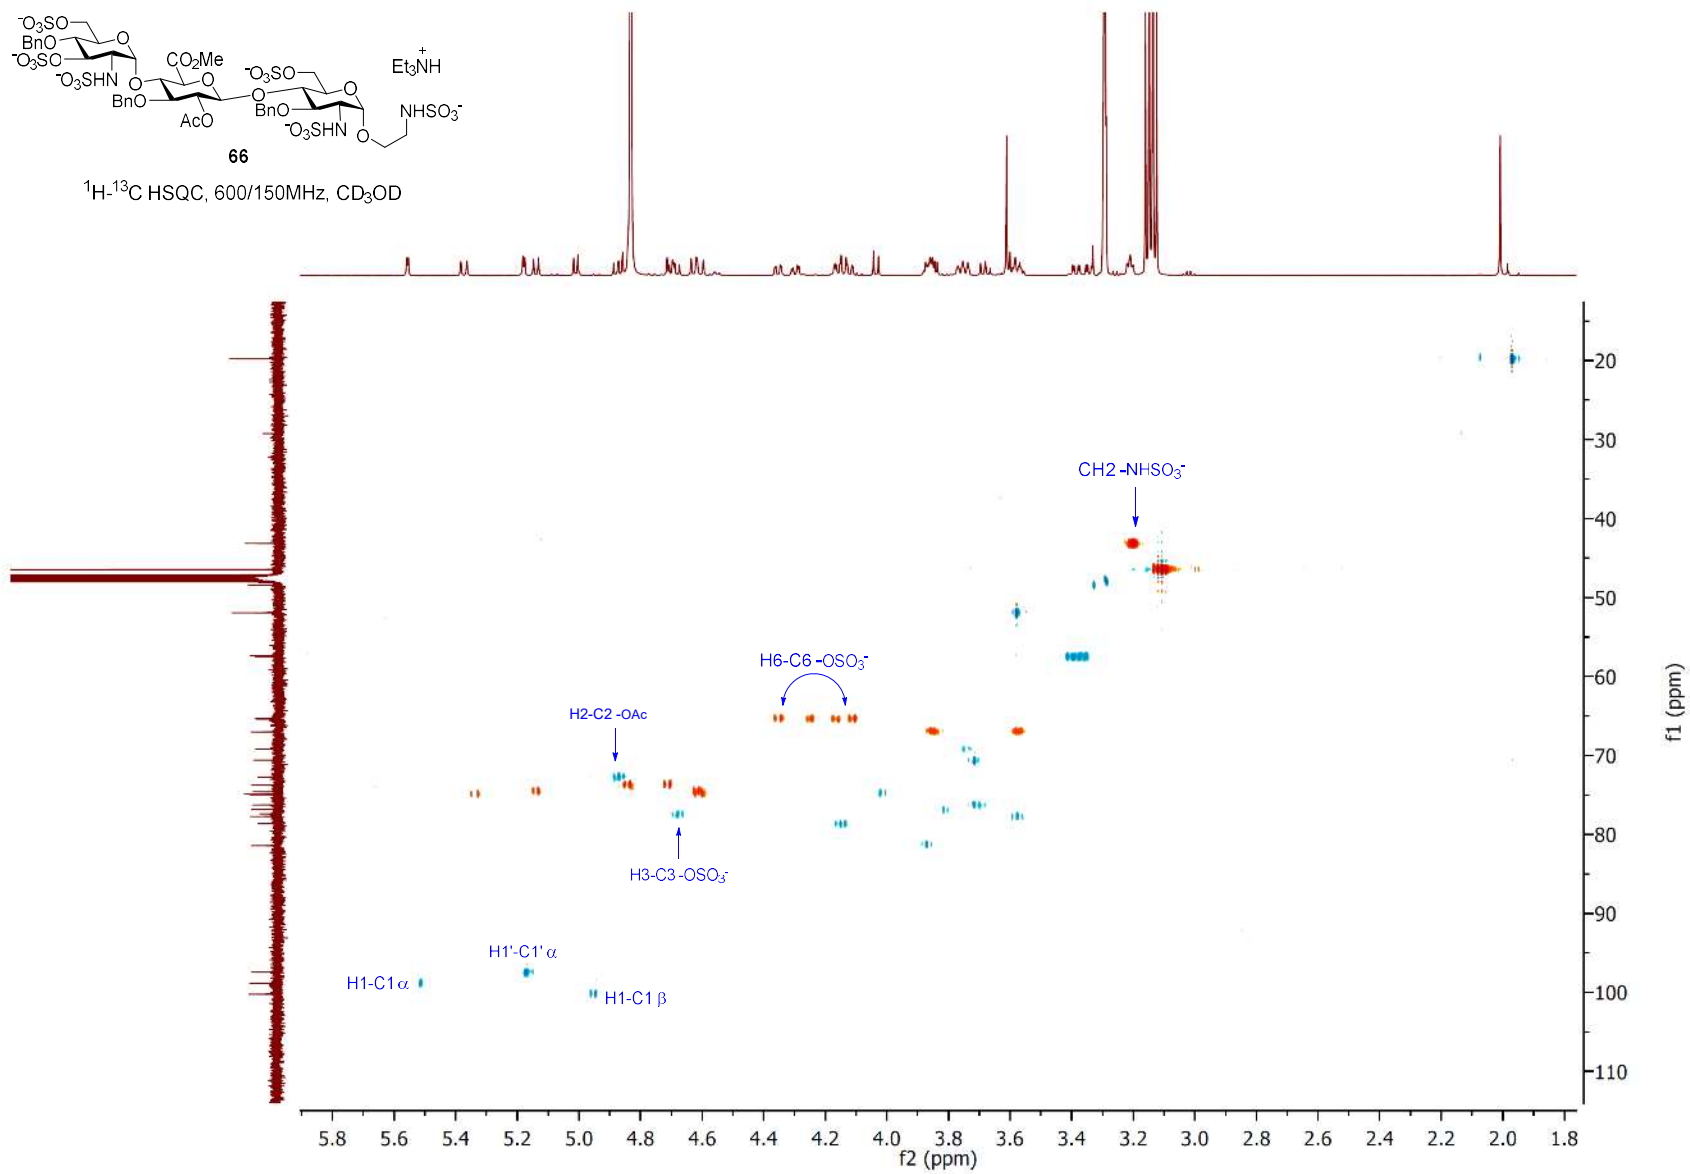

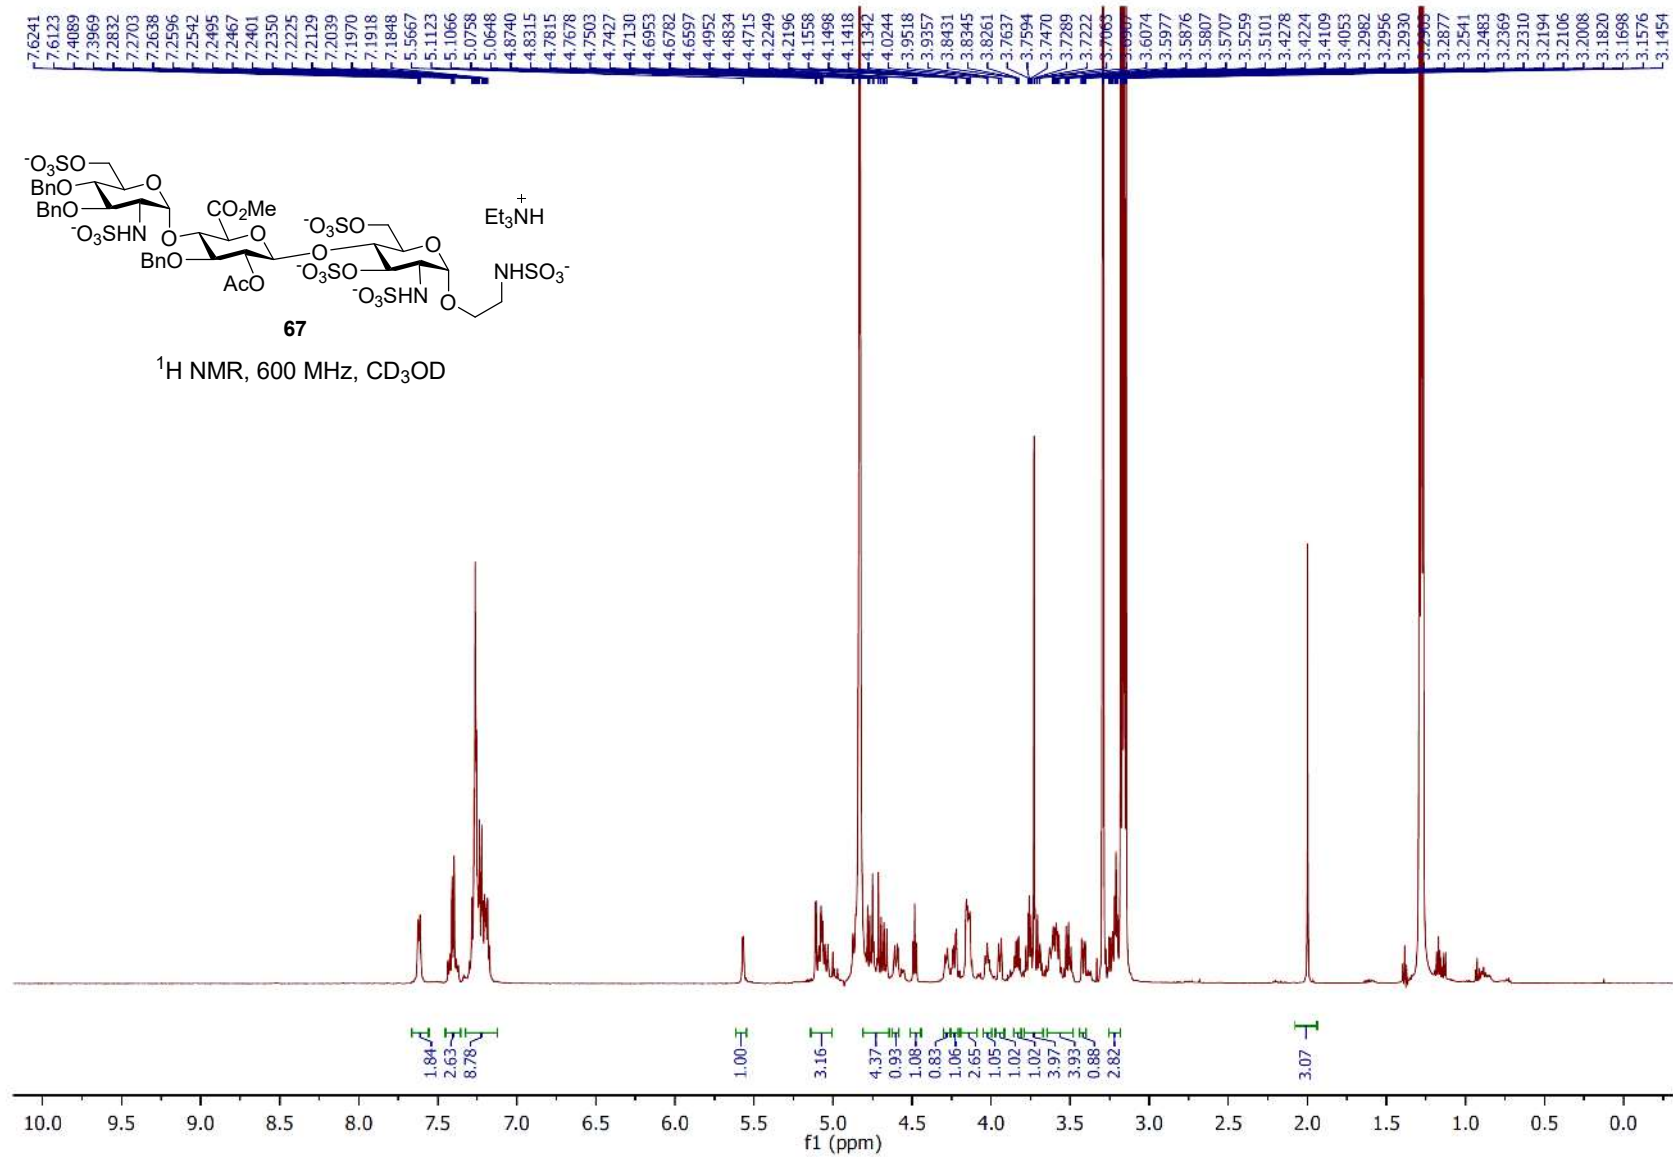

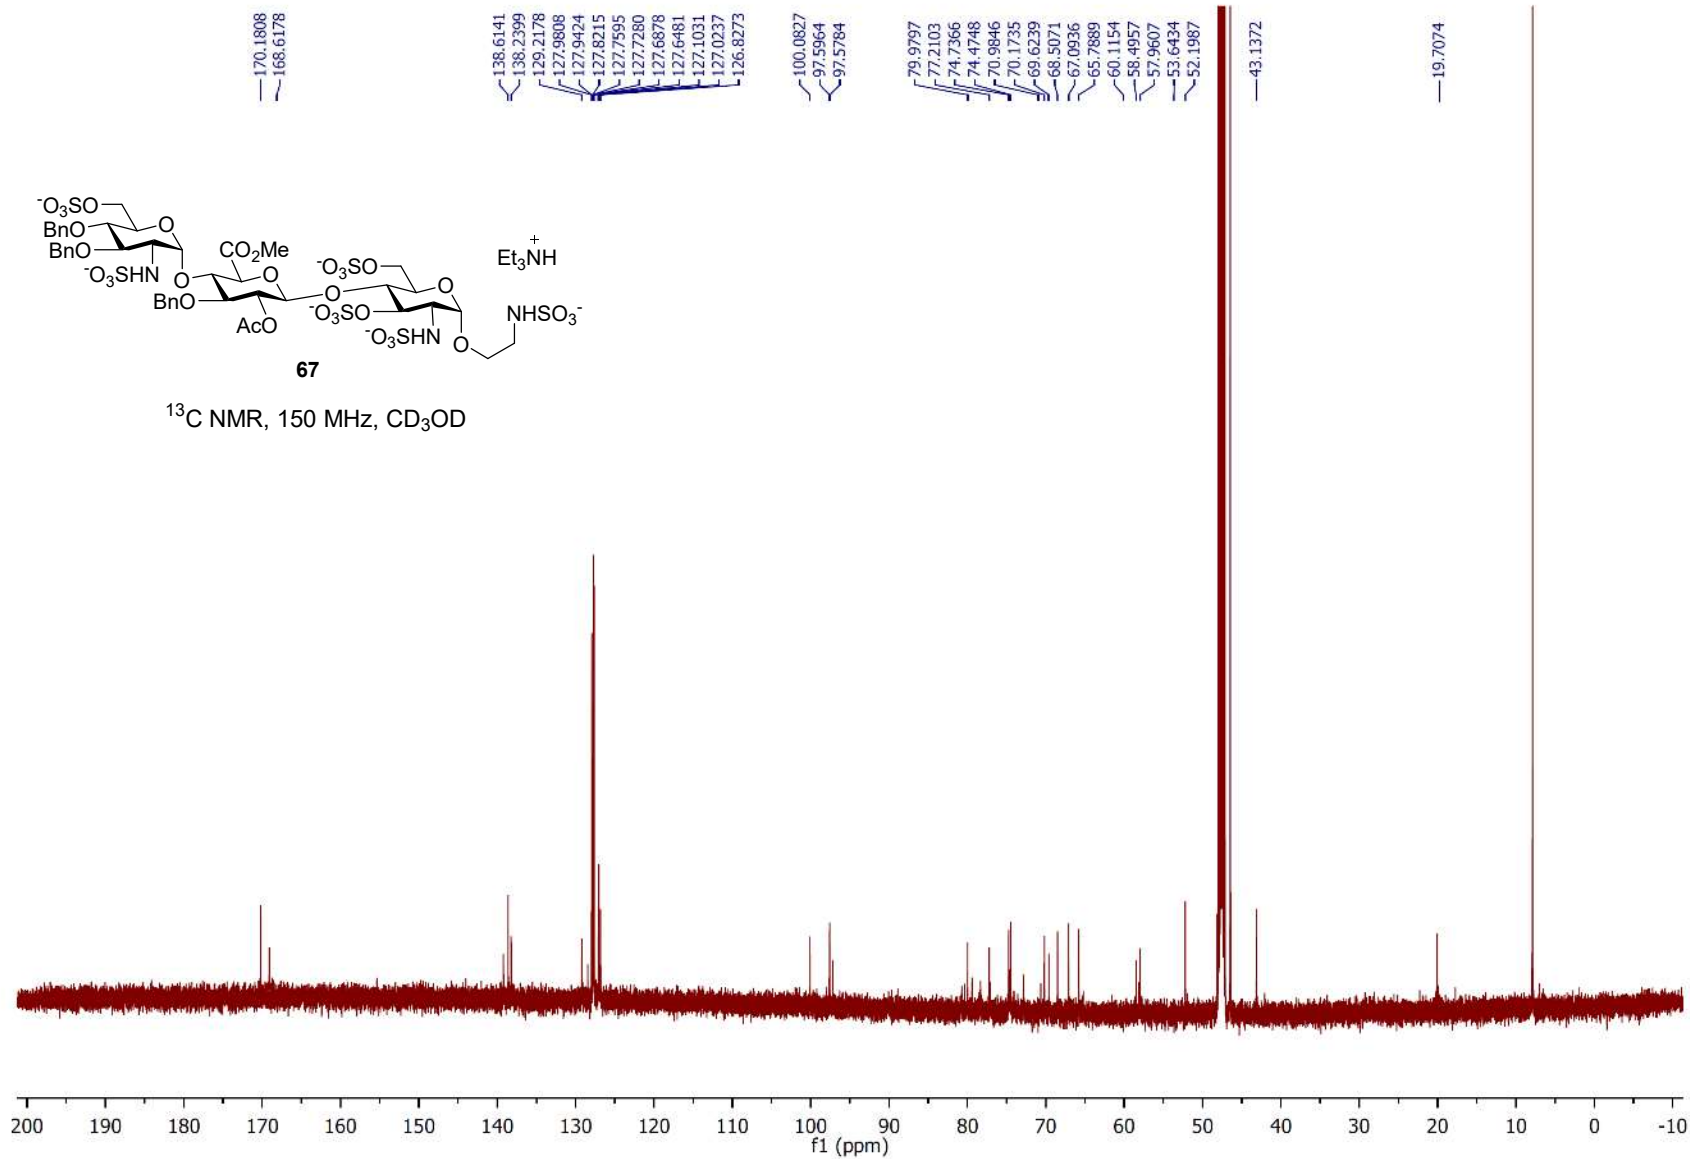



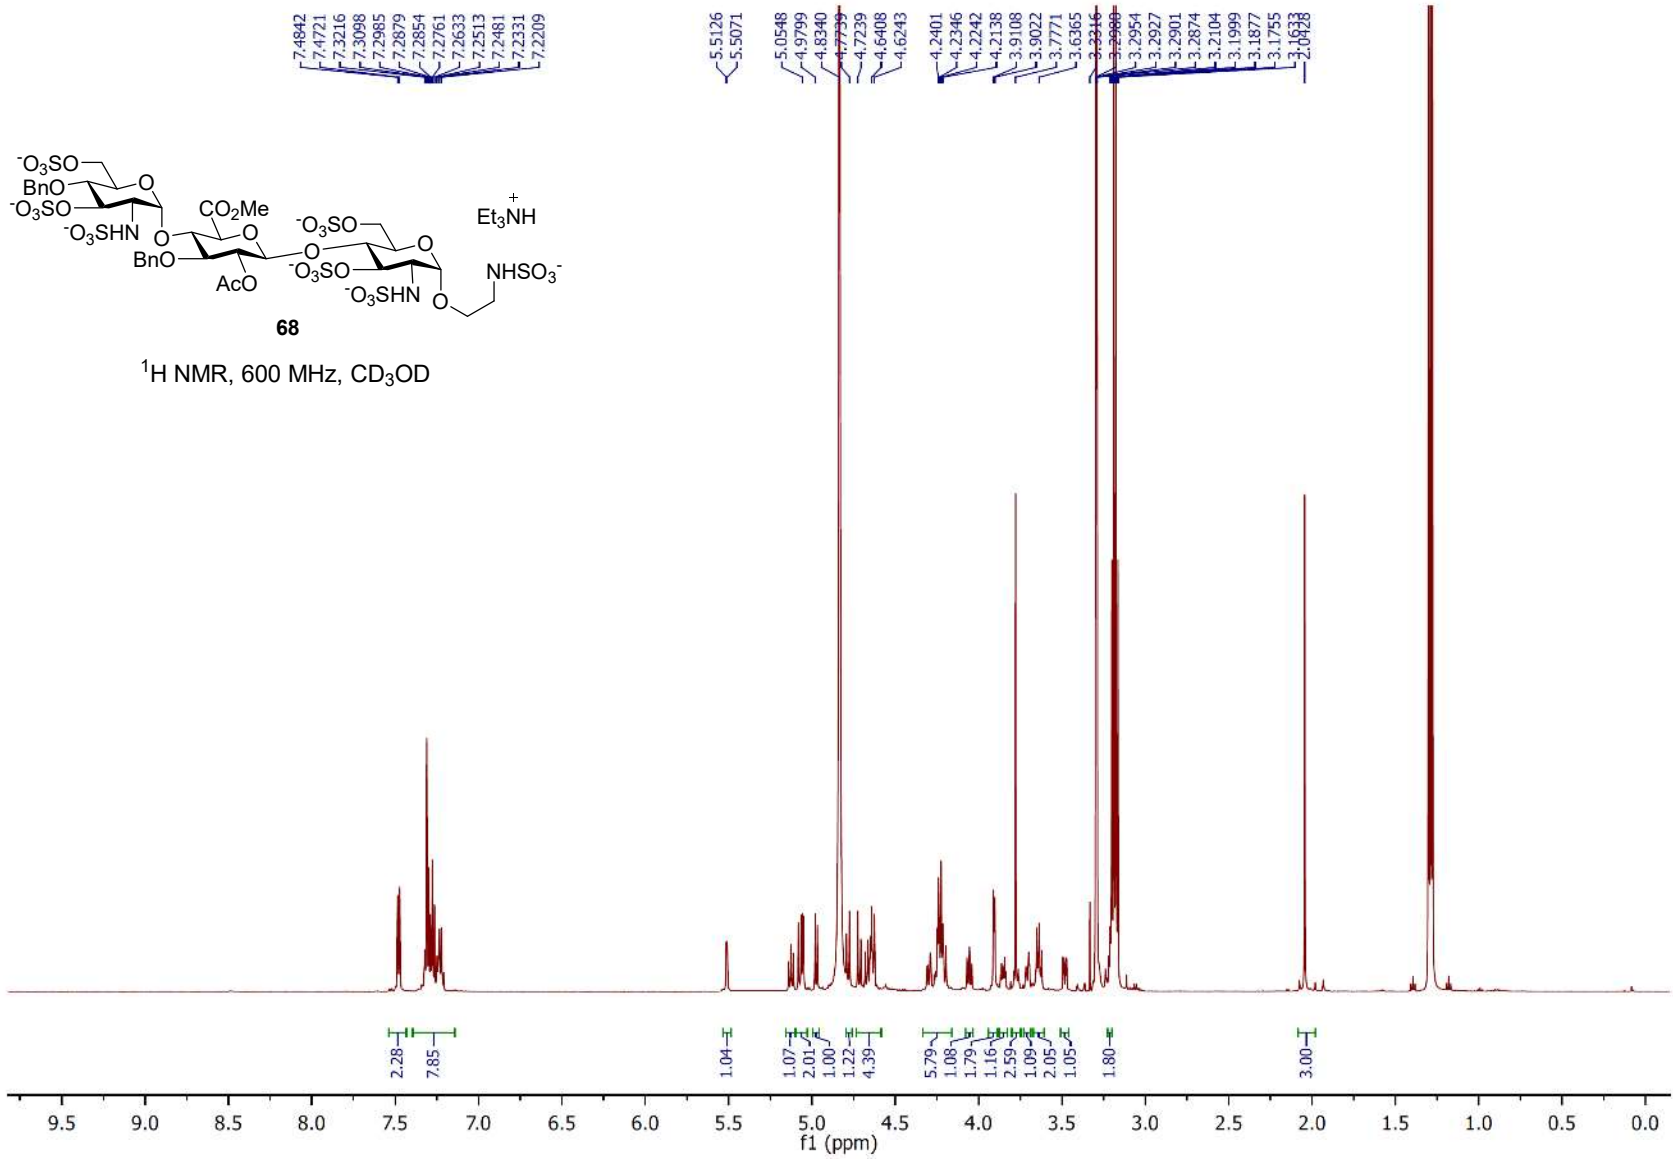

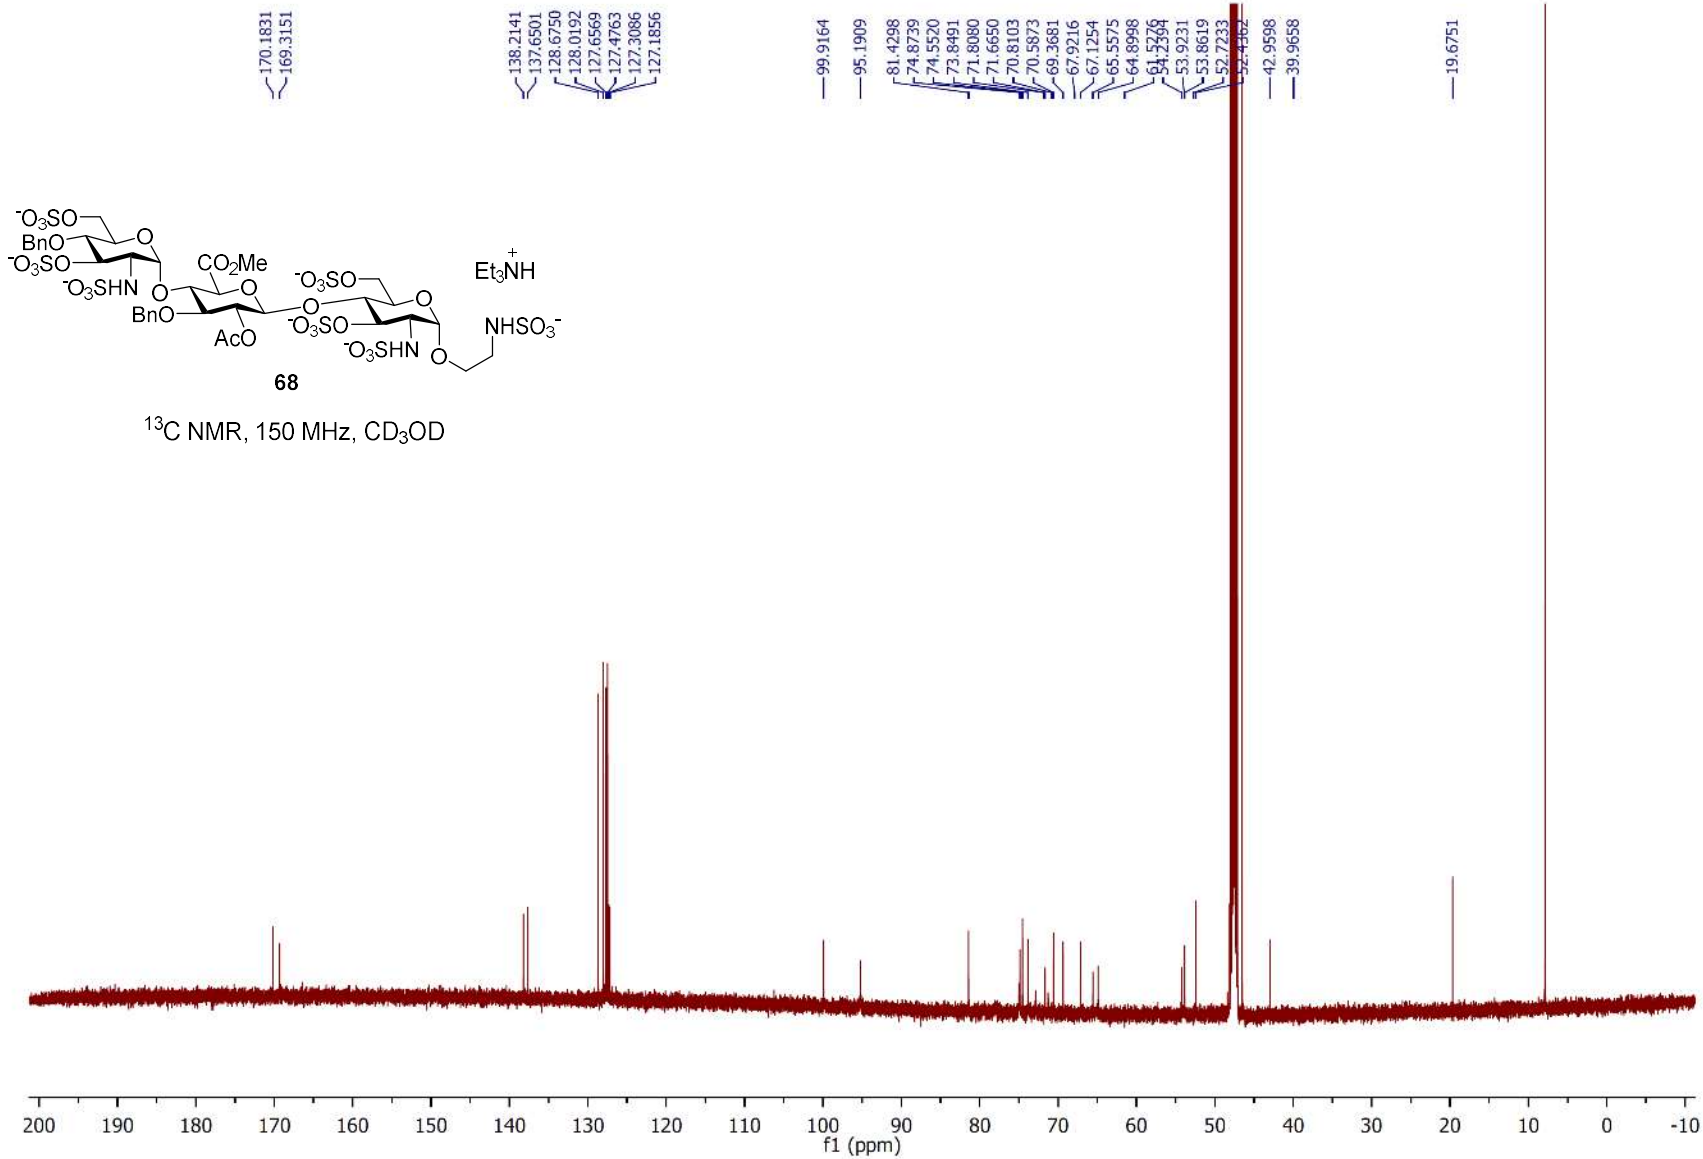

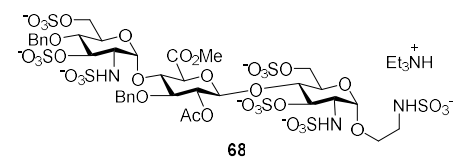

$^1\text{H}$ - $^{13}\text{C}$  HSQC, 600/150MHz,  $\text{CD}_3\text{OD}$

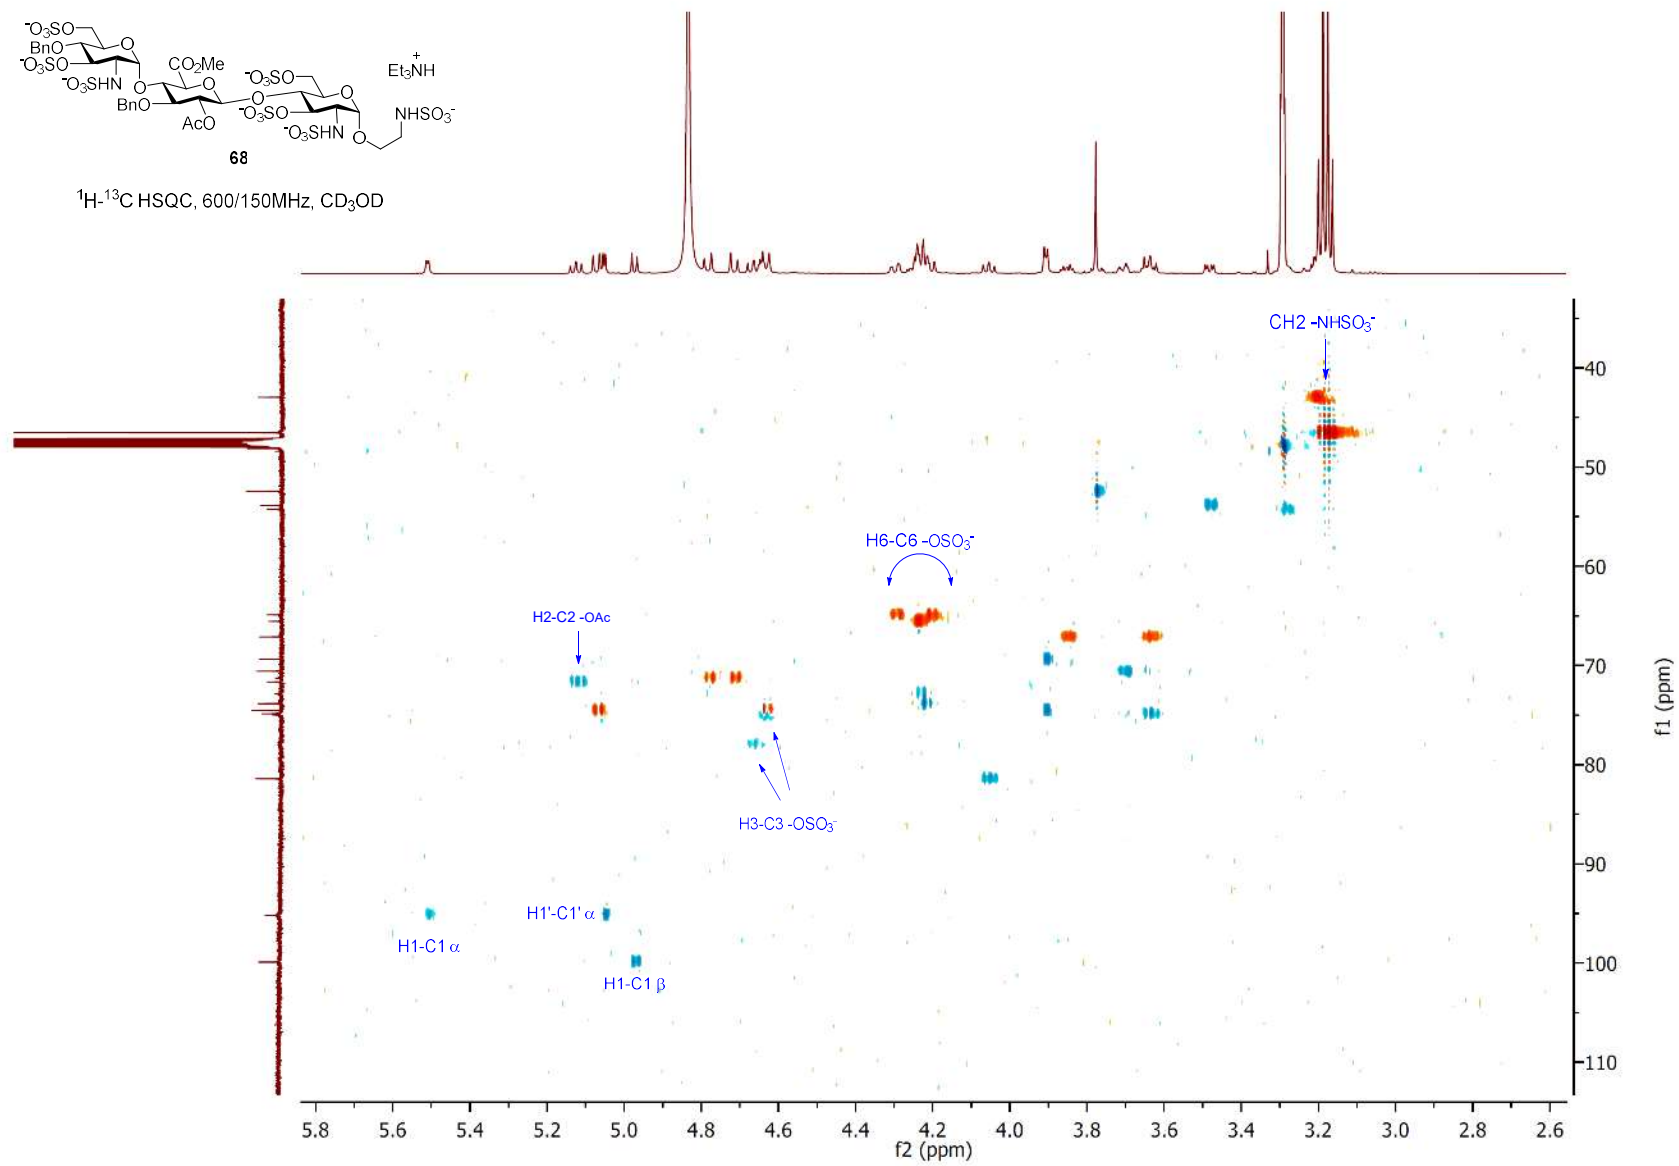

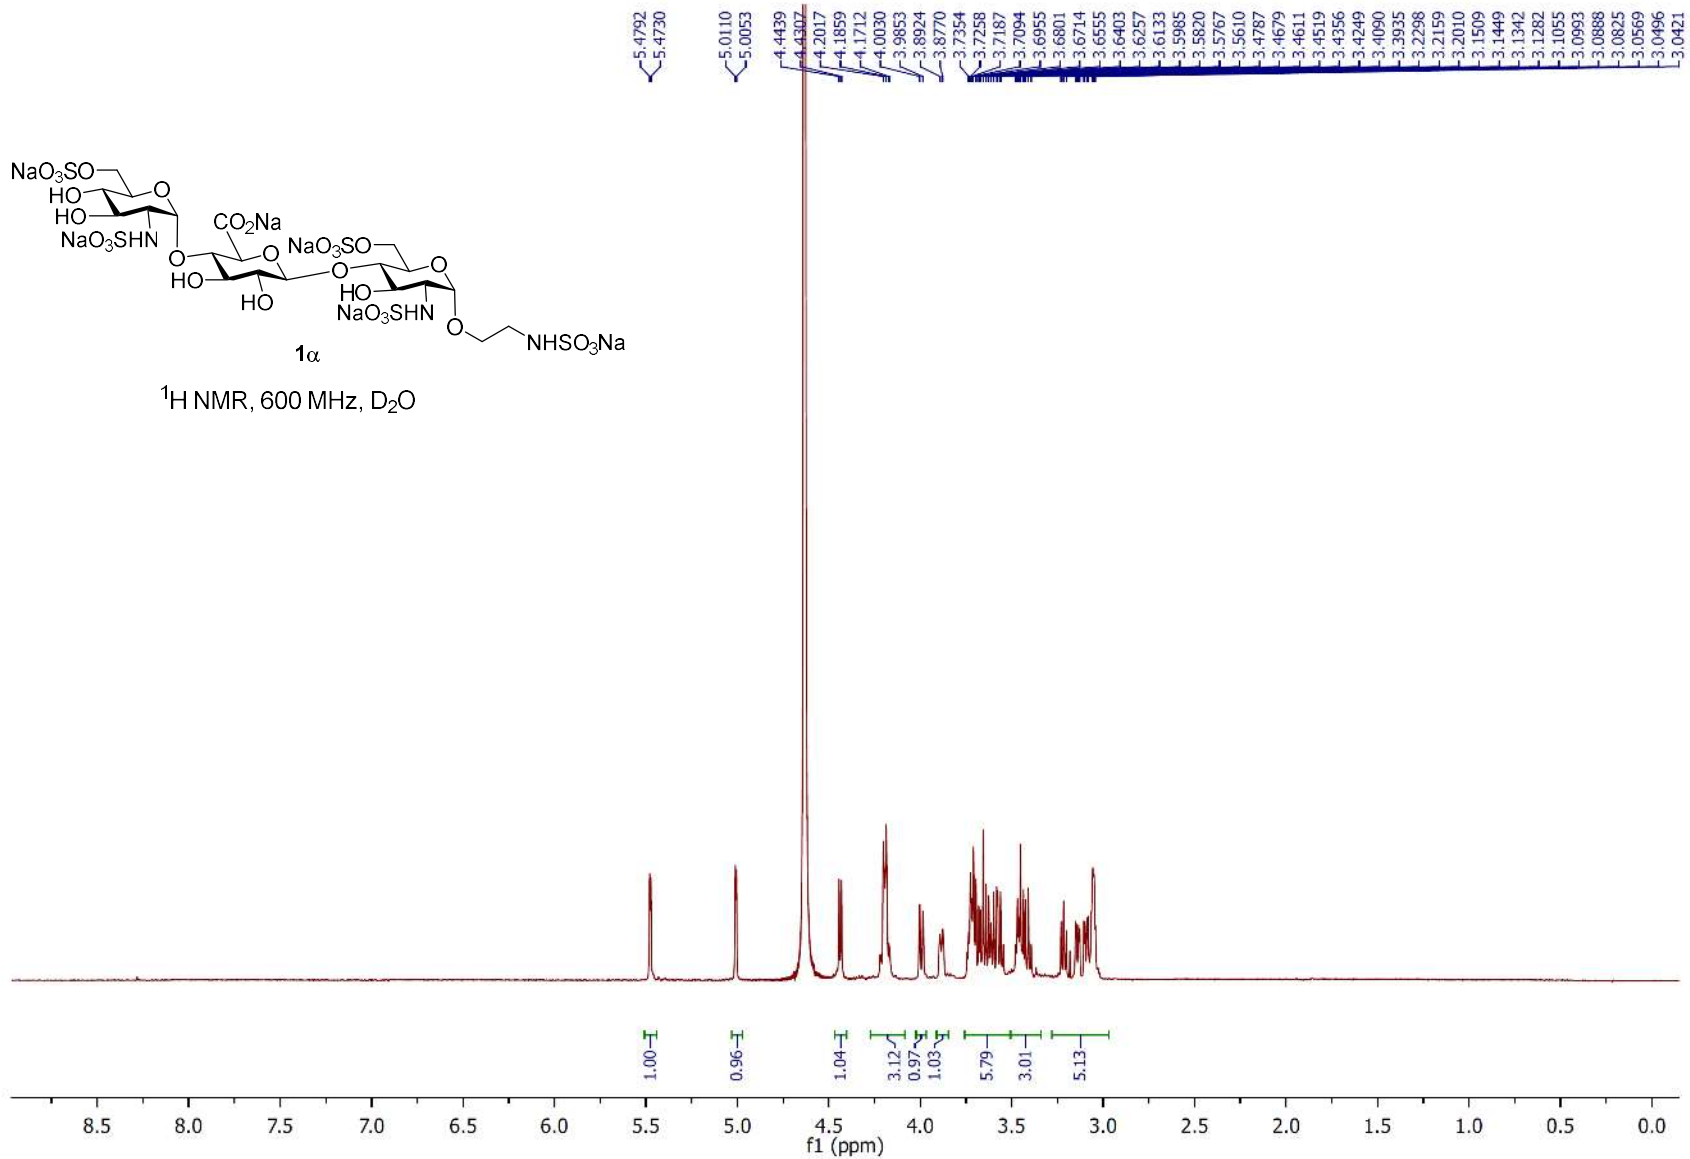

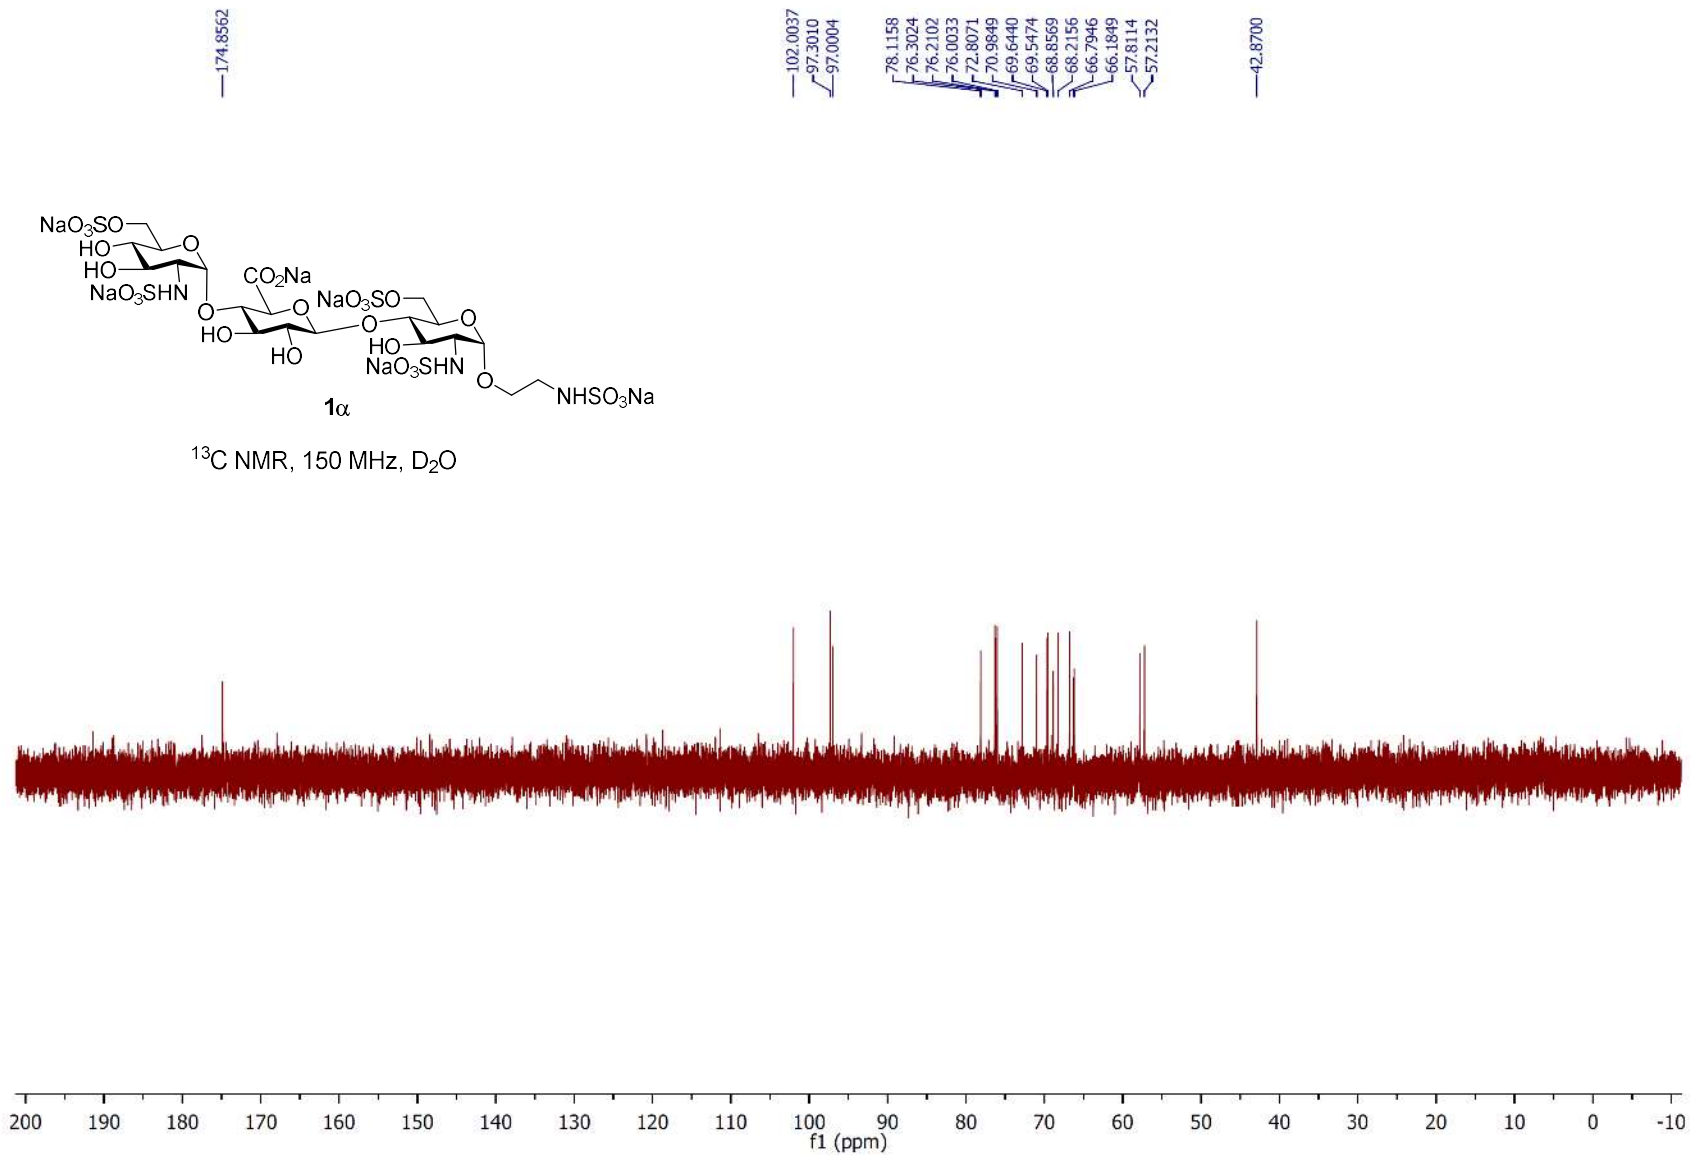

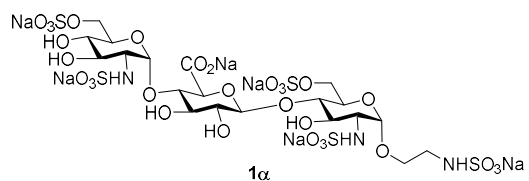

$^1\text{H}$ - $^{13}\text{C}$  HSQC, 600/150MHz, D<sub>2</sub>O

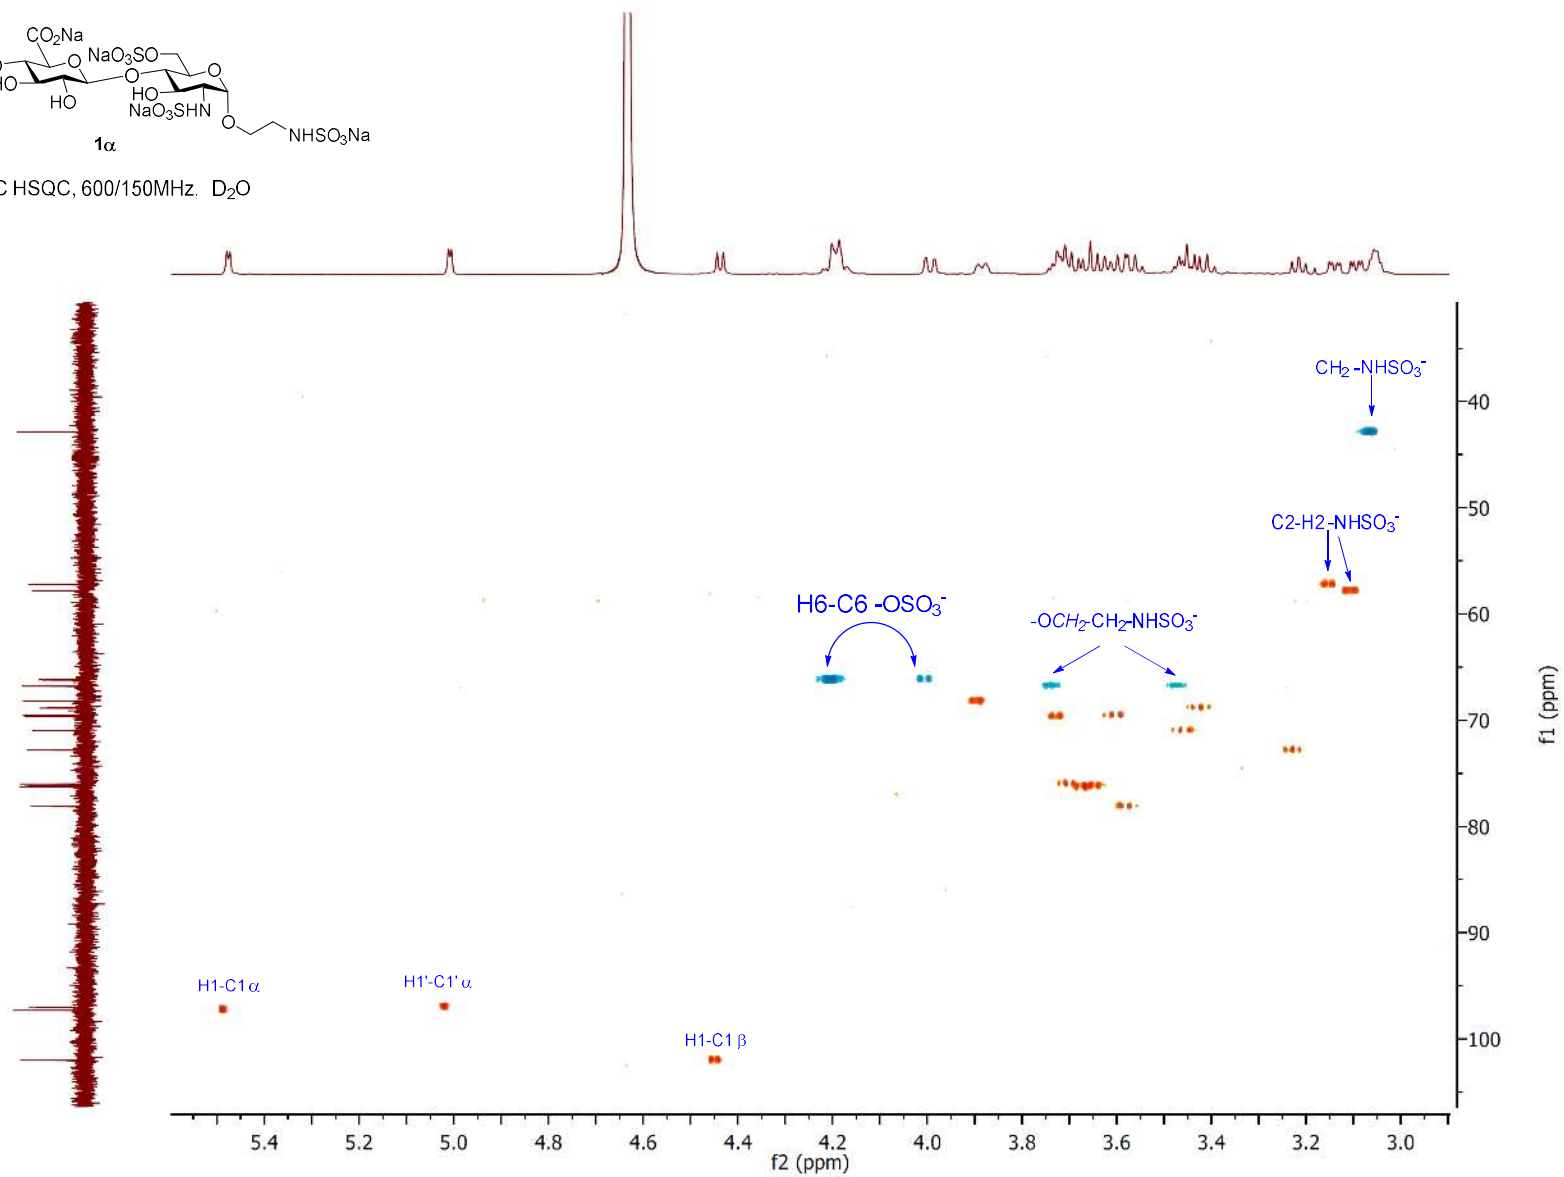

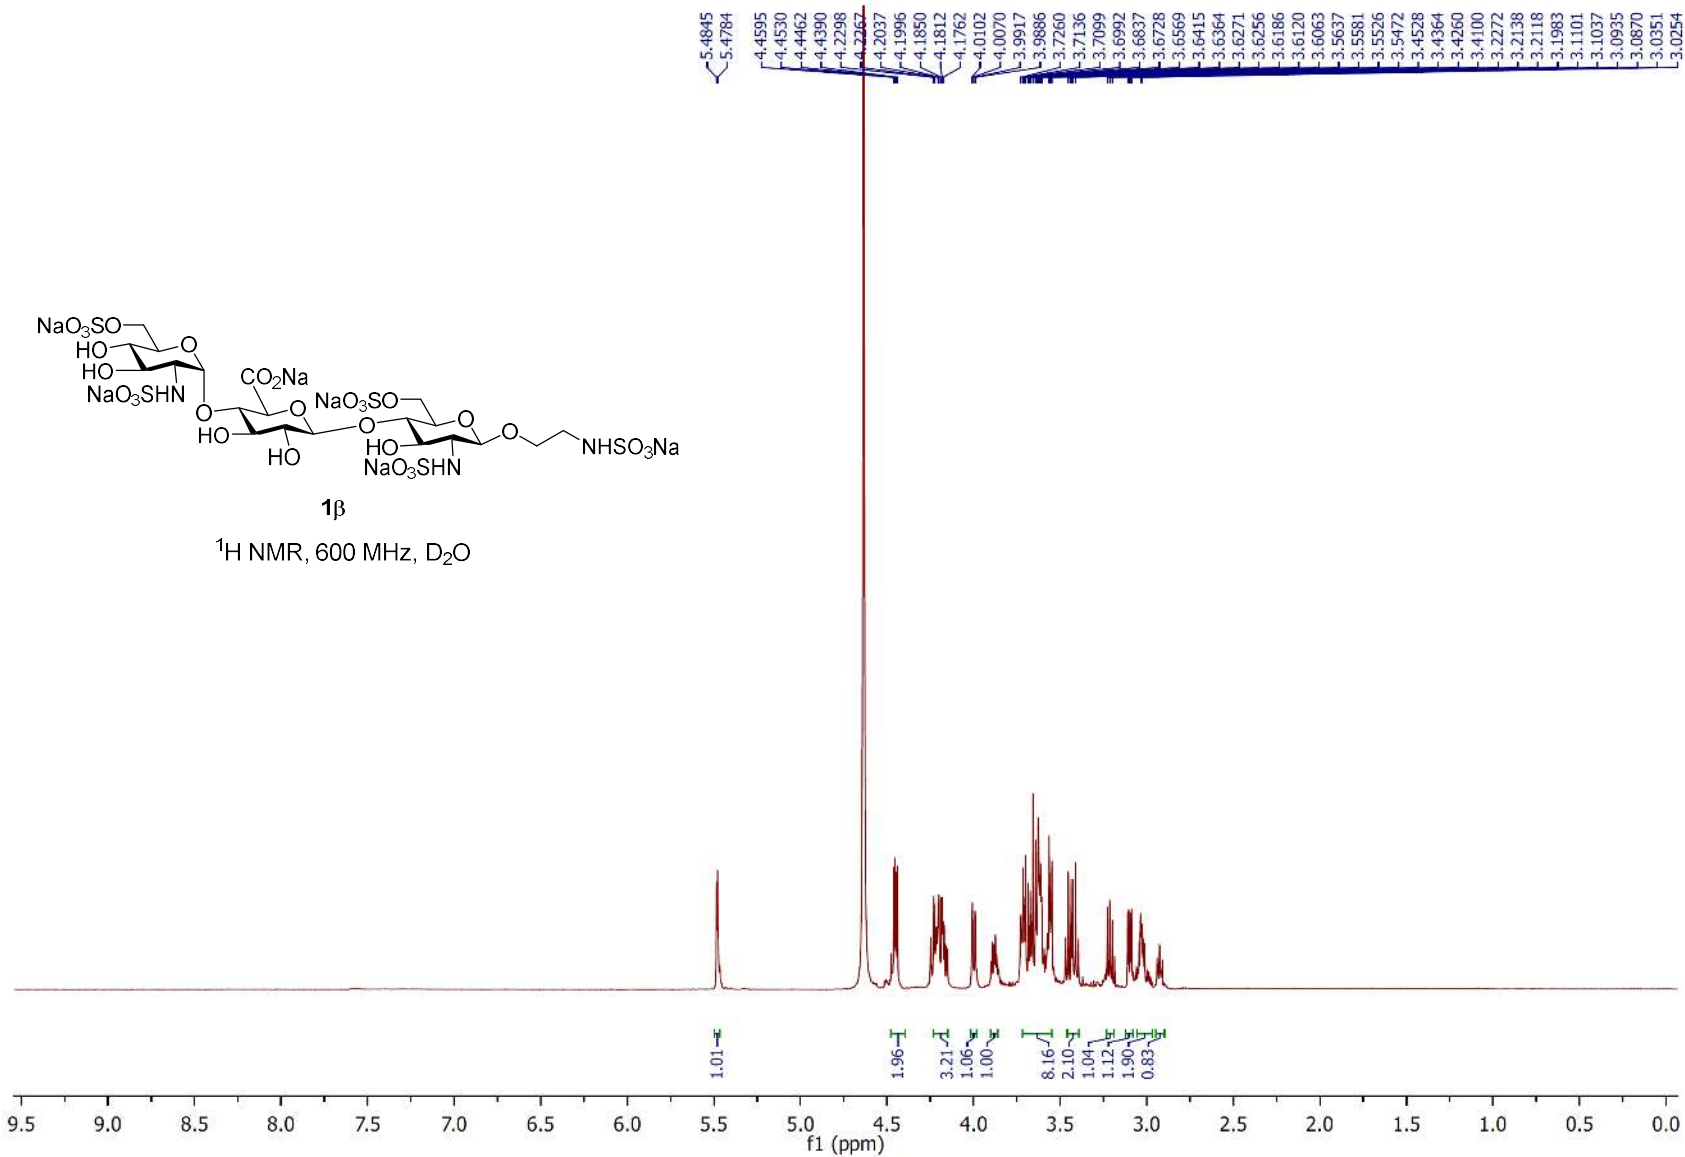

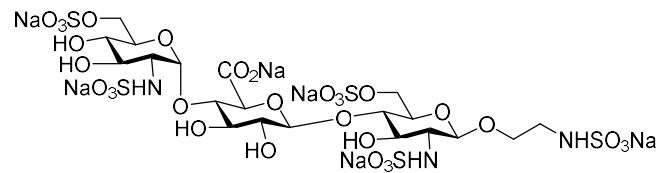

1β

<sup>13</sup>C NMR, 150 MHz, D<sub>2</sub>O

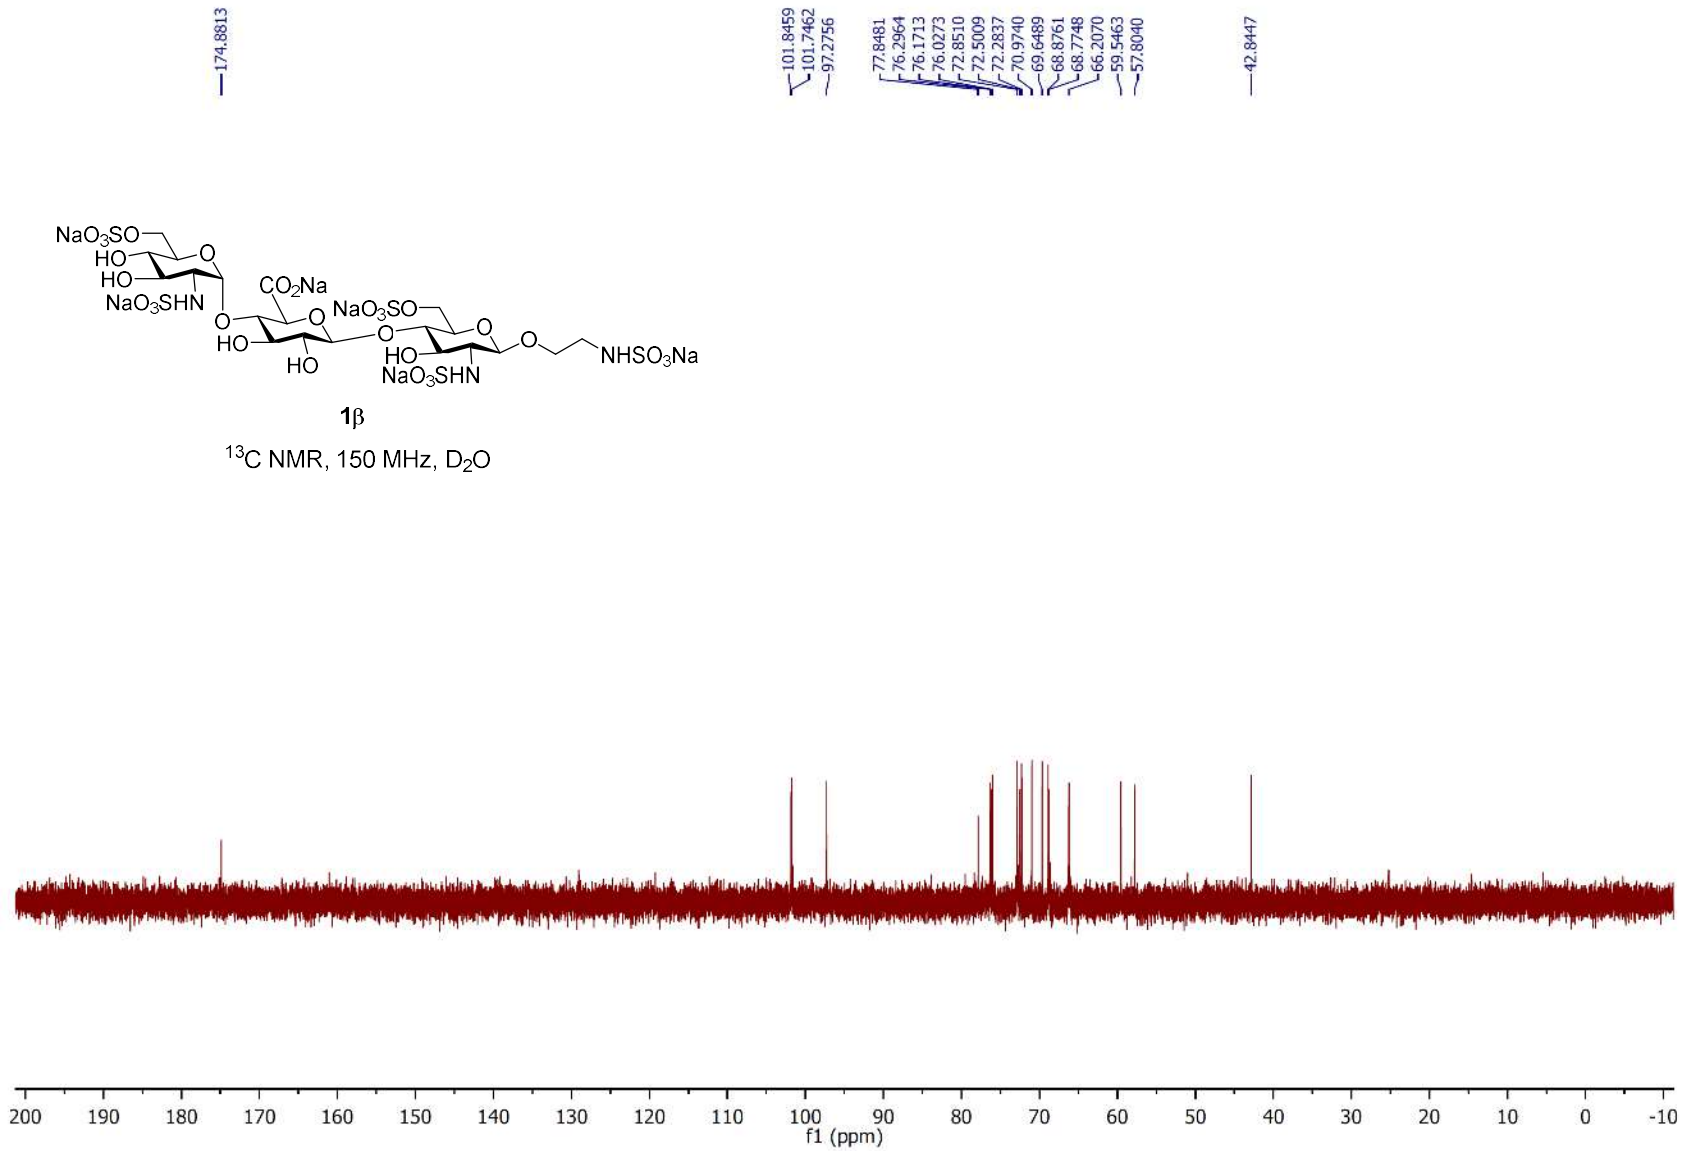



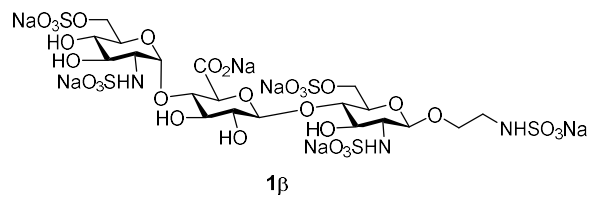

$^1\text{H}$ - $^{13}\text{C}$  HSQC, 600/150MHz,  $\text{D}_2\text{O}$

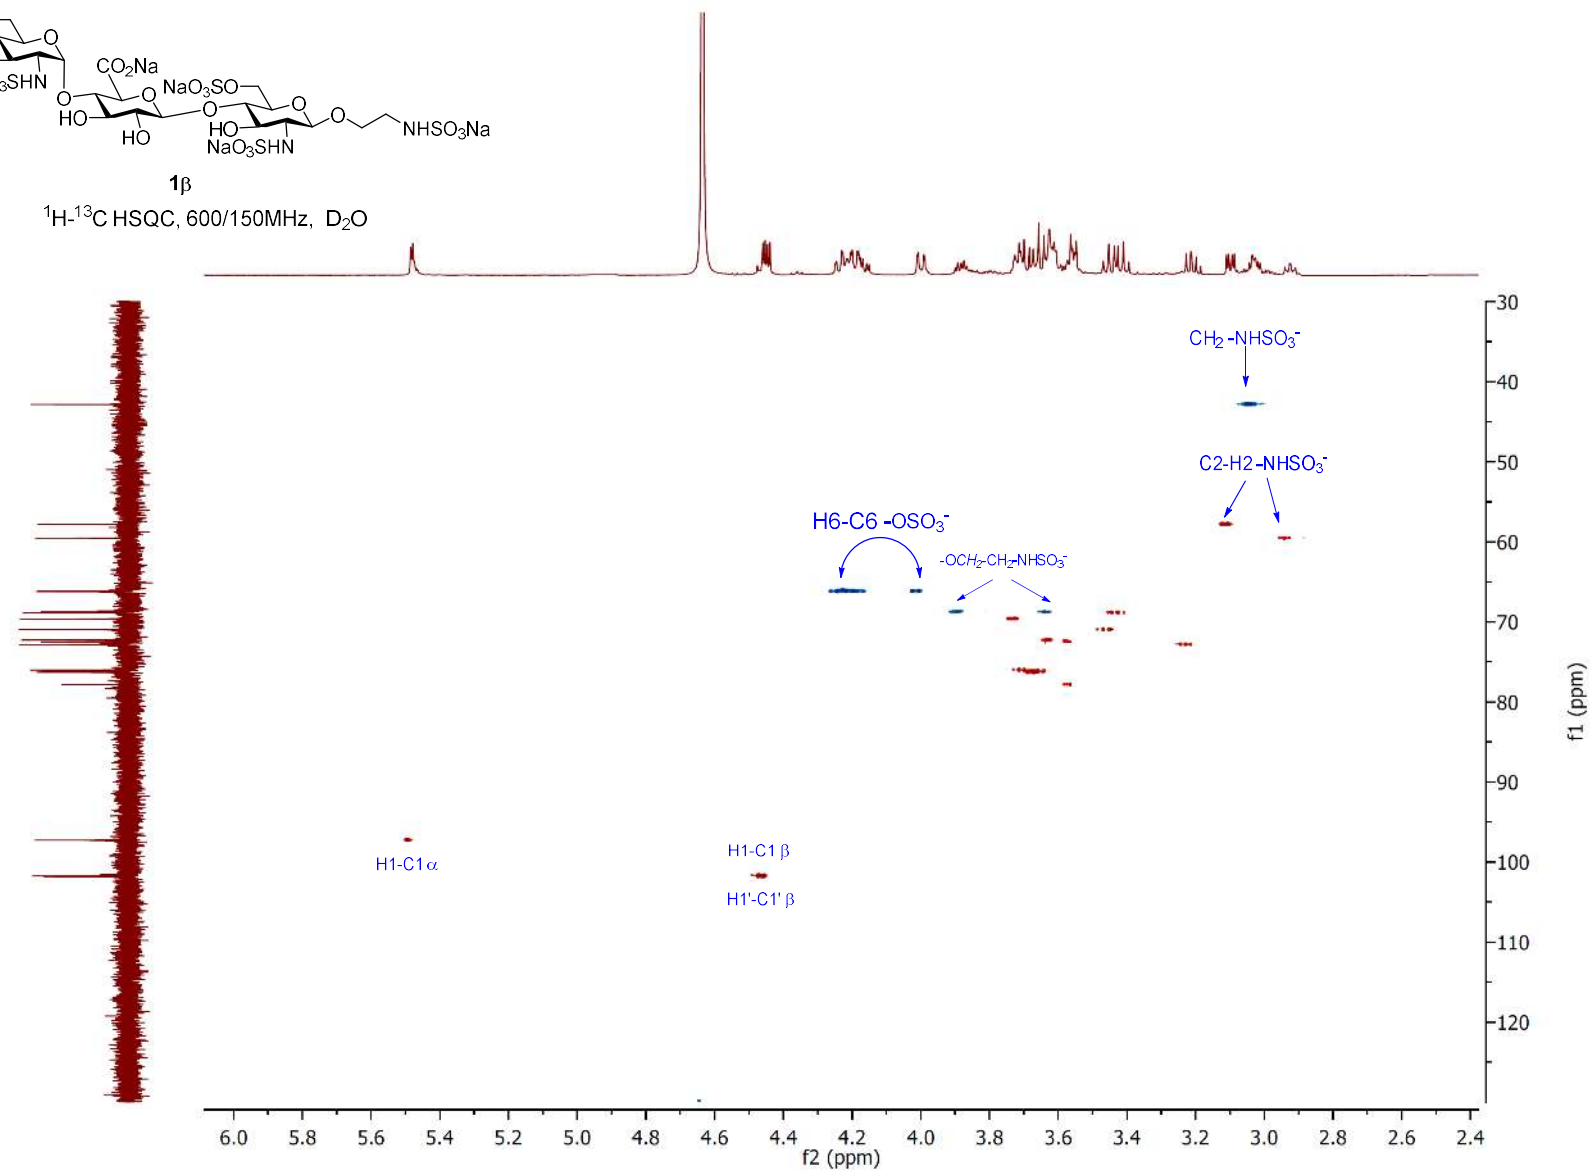

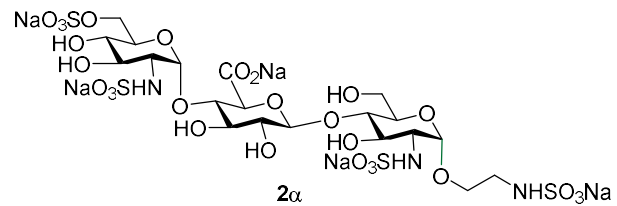

$^1\text{H}$  NMR, 600 MHz,  $\text{D}_2\text{O}$

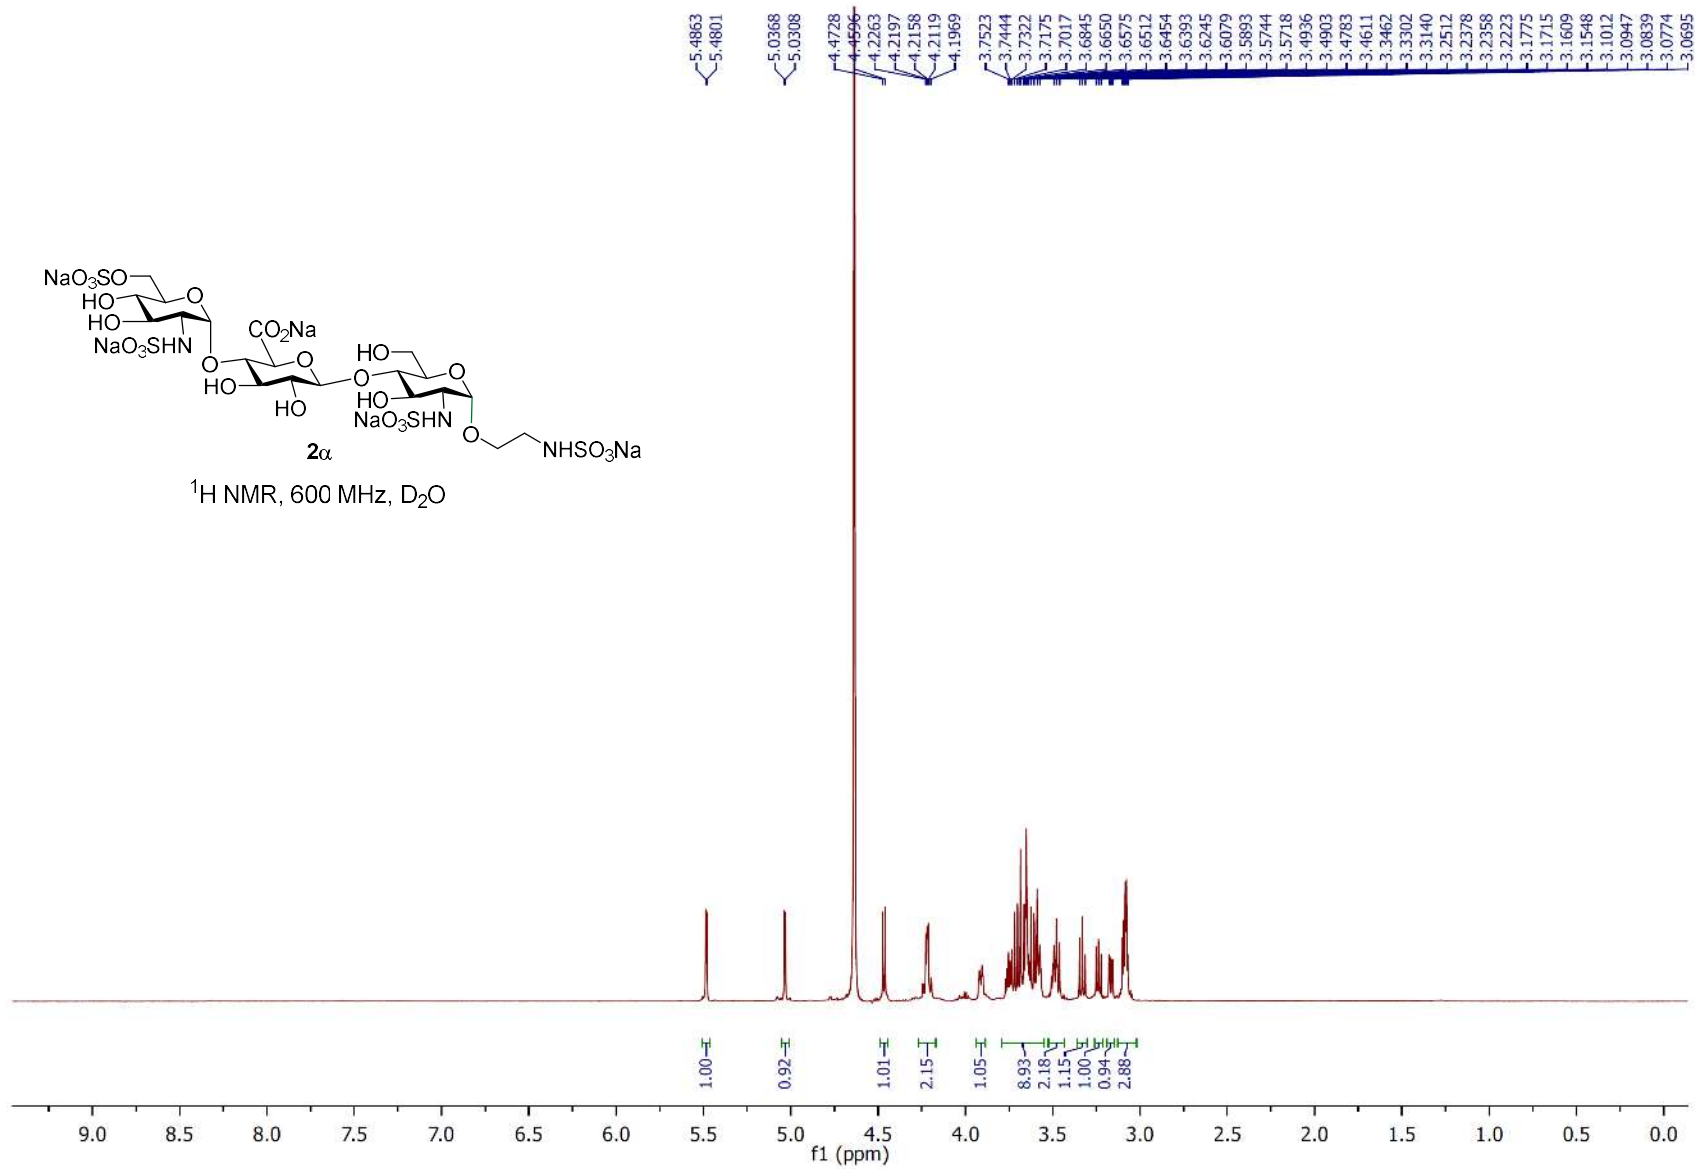

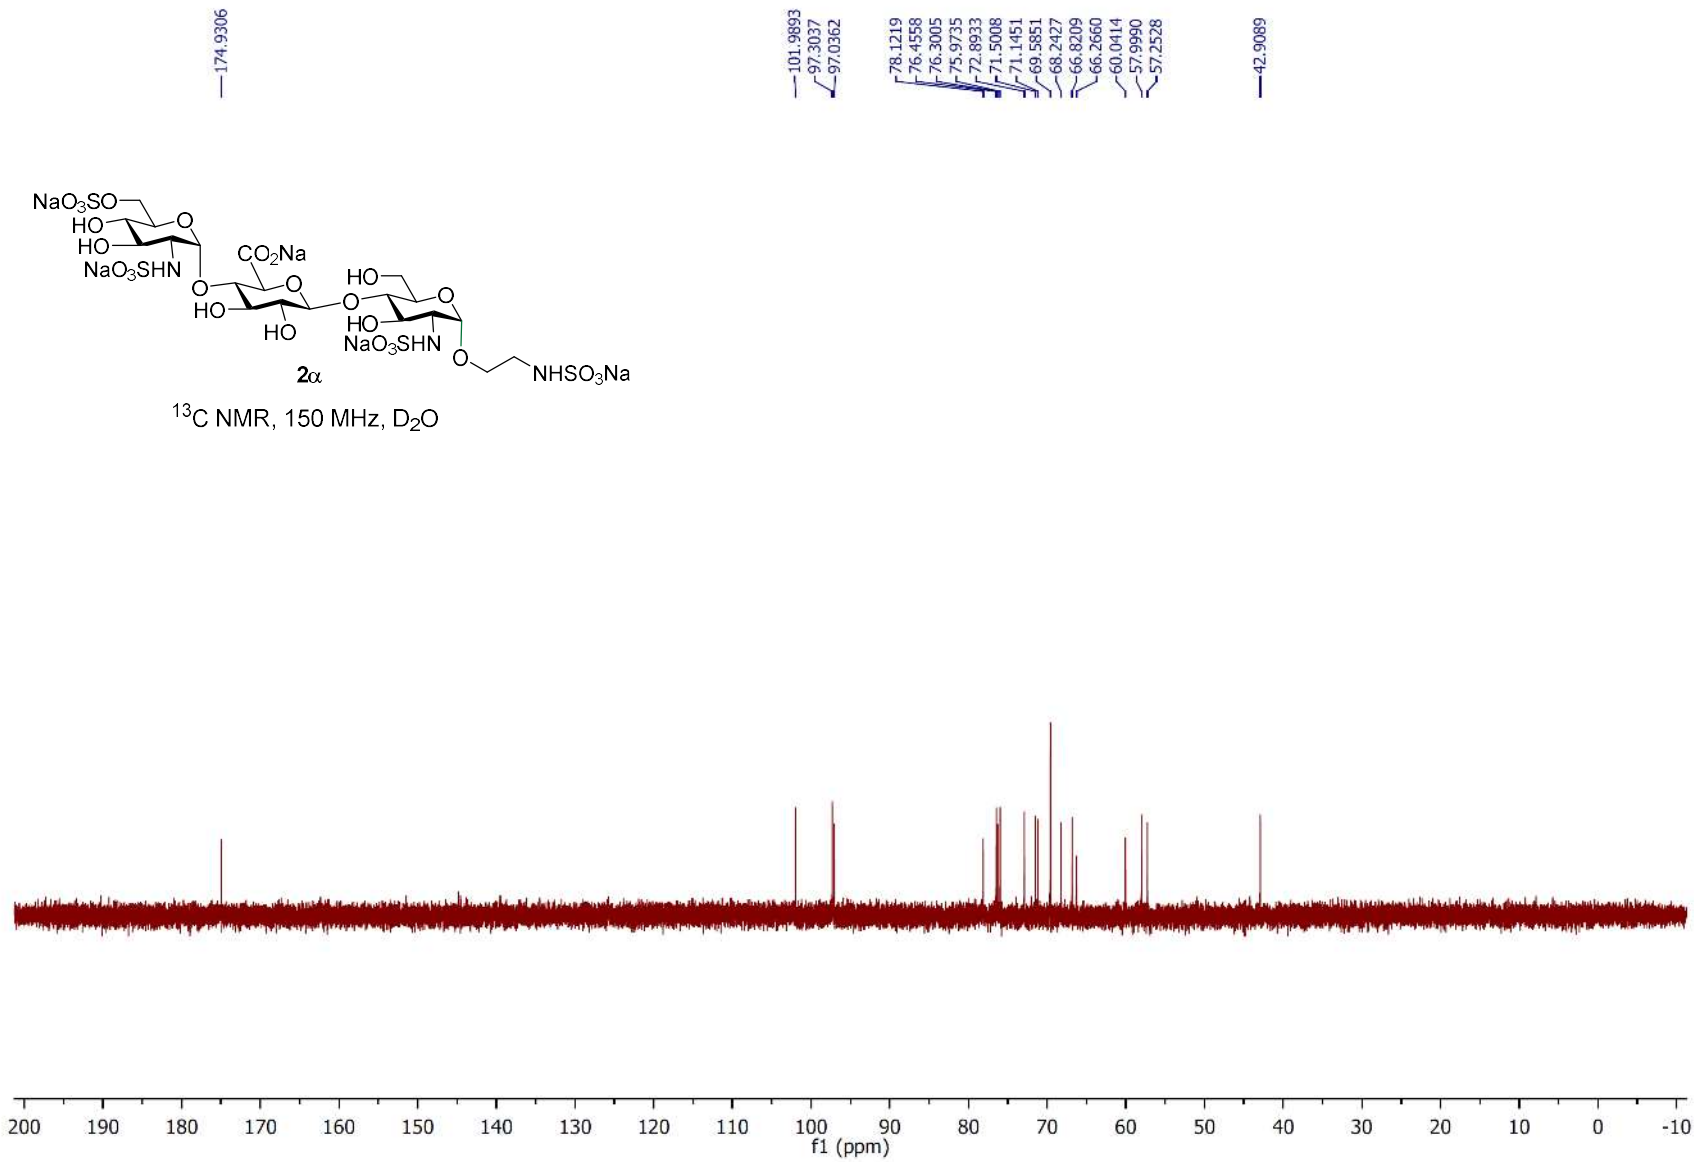

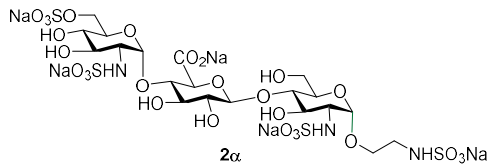

$^1\text{H}$ - $^{13}\text{C}$  HSQC, 600/150MHz,  $\text{D}_2\text{O}$

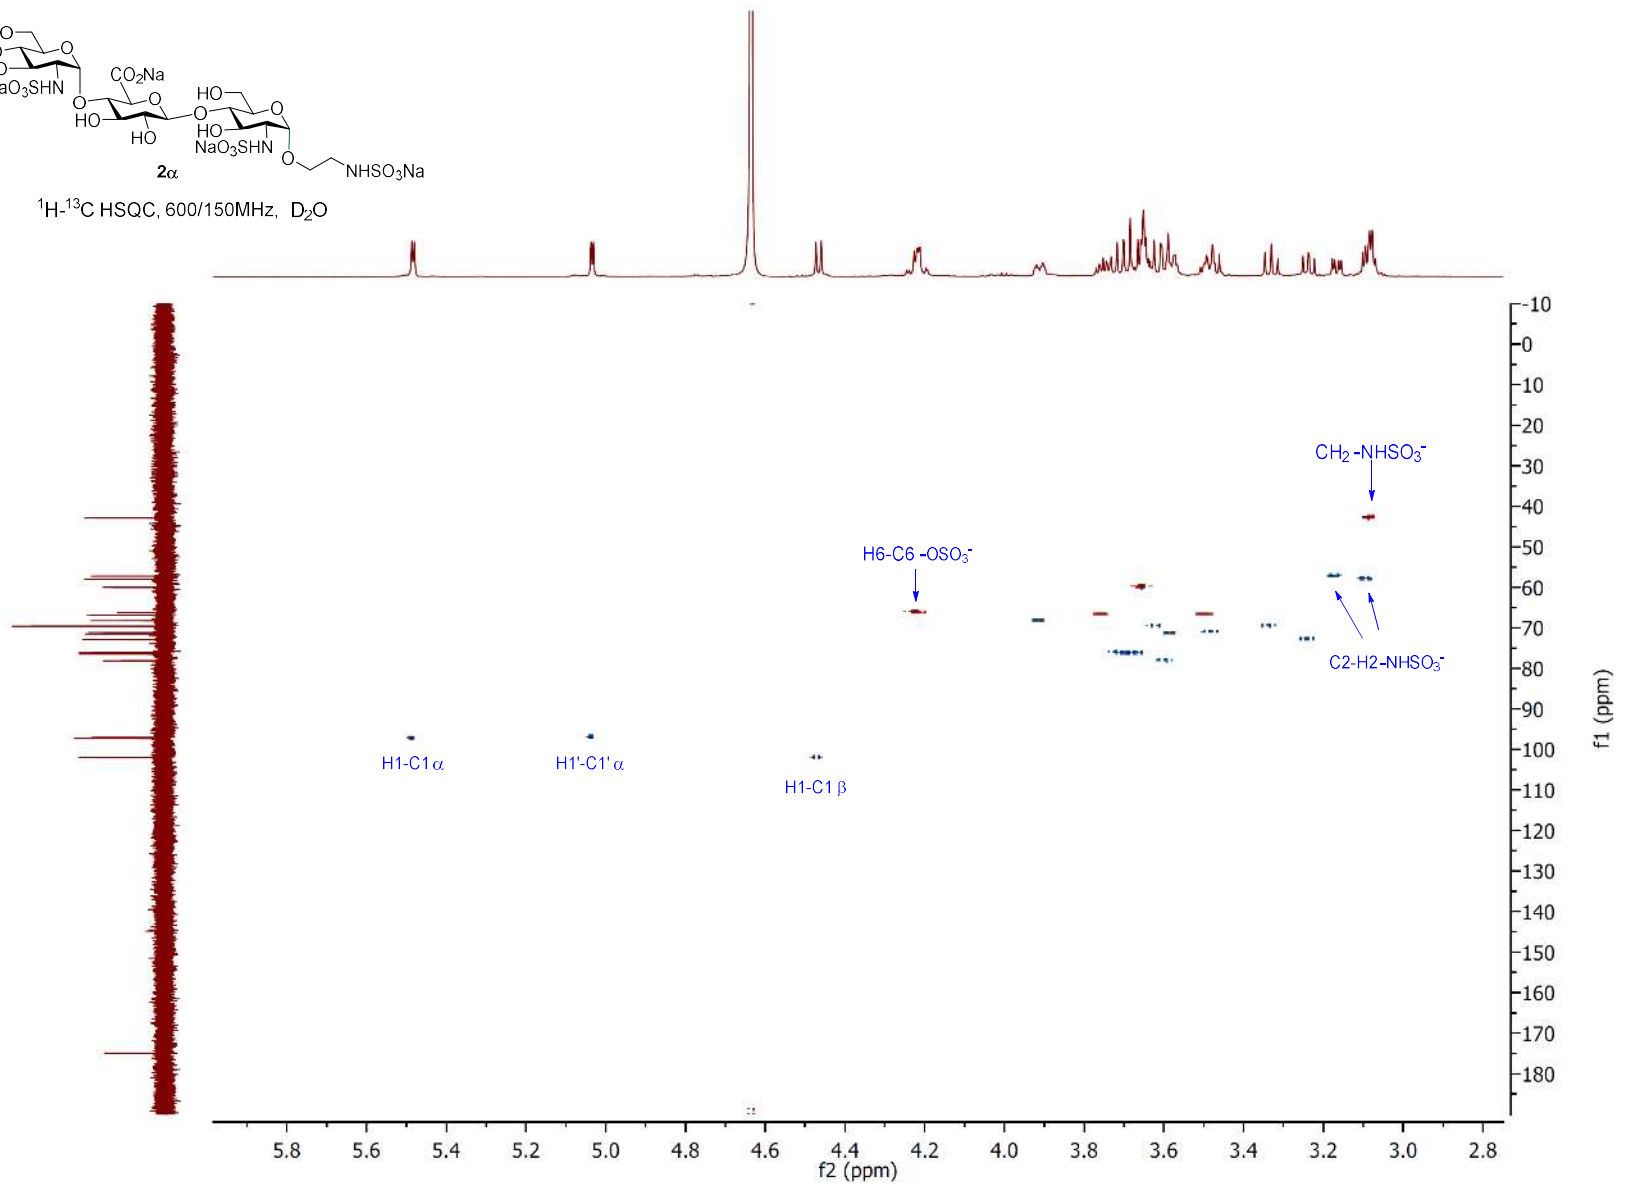

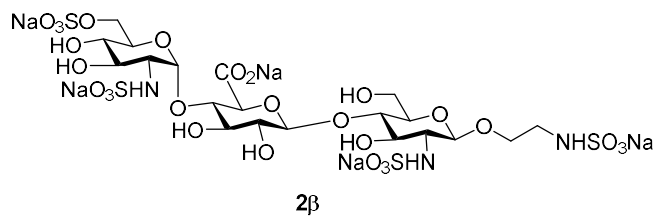

<sup>1</sup>H NMR, 600 MHz, D<sub>2</sub>O

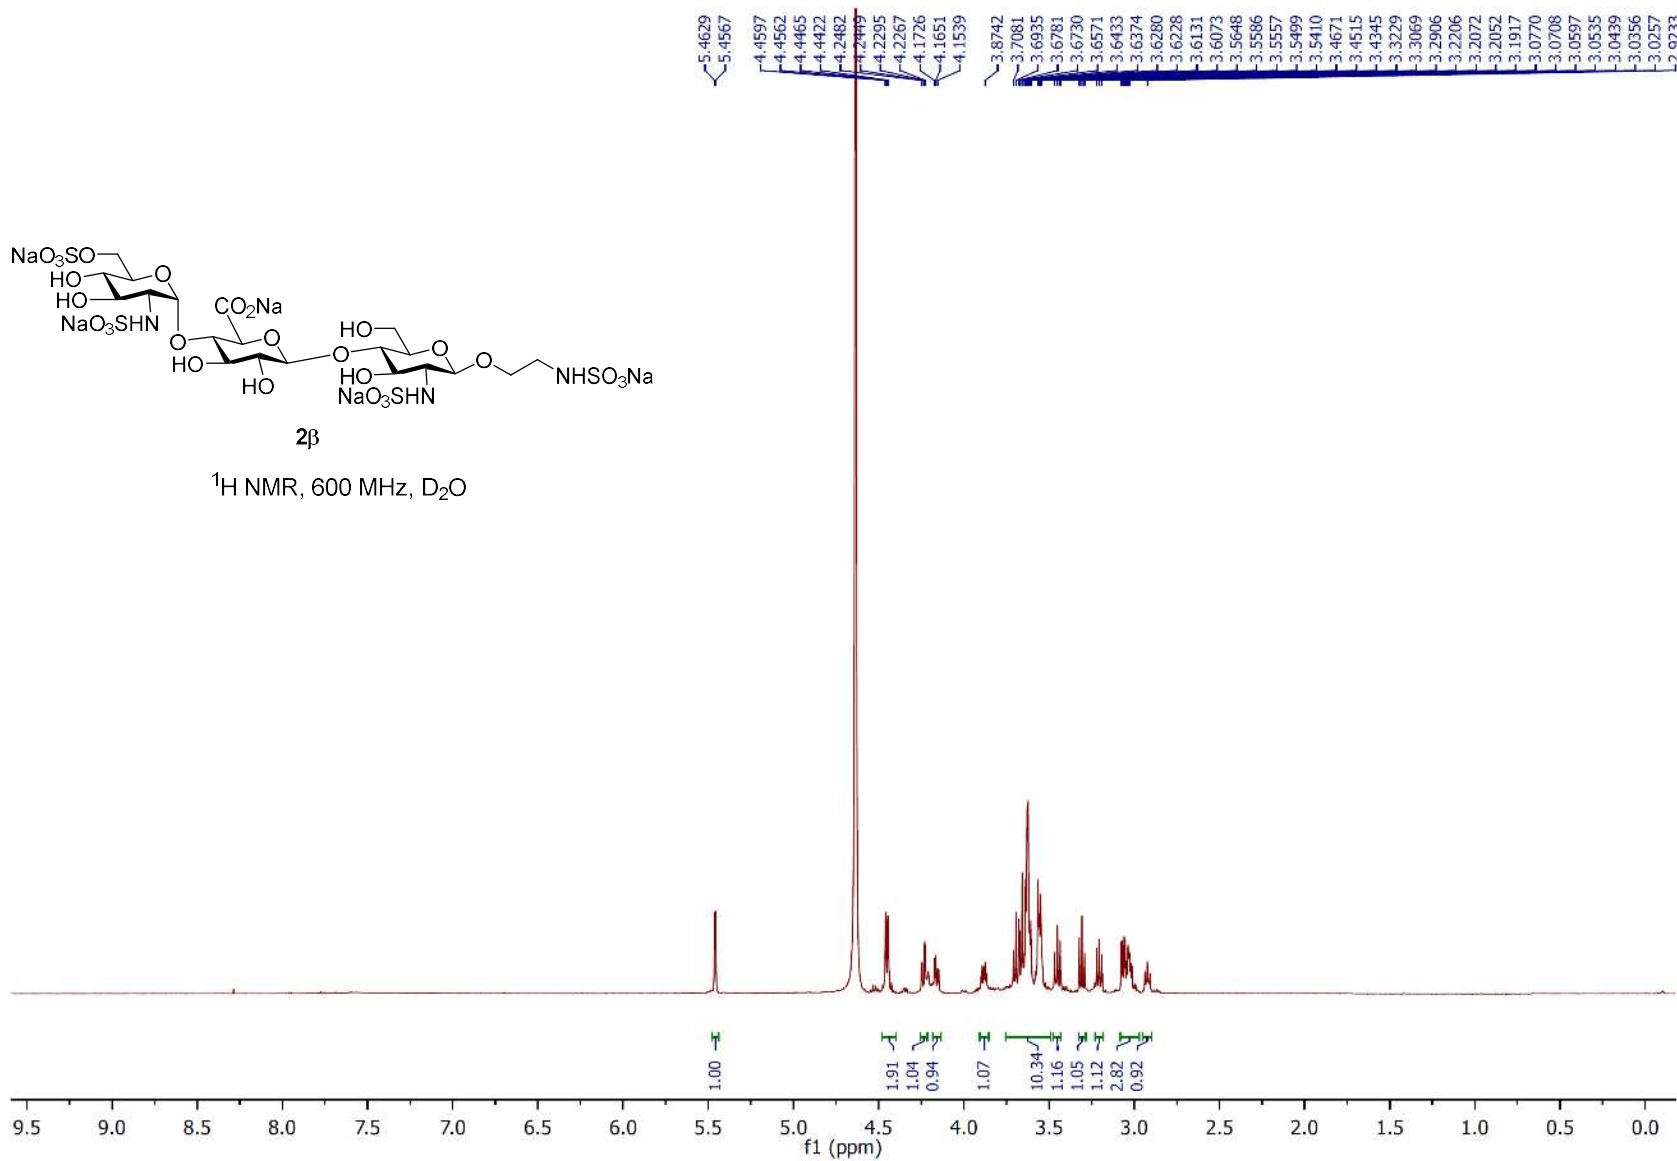

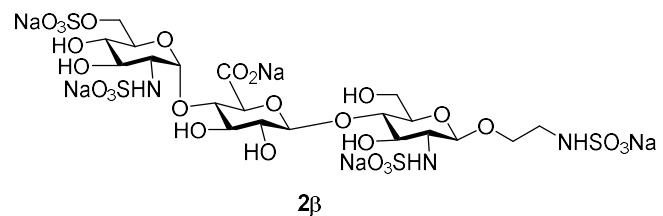

**2β**

$^{13}\text{C}$  NMR, 150 MHz,  $\text{D}_2\text{O}$

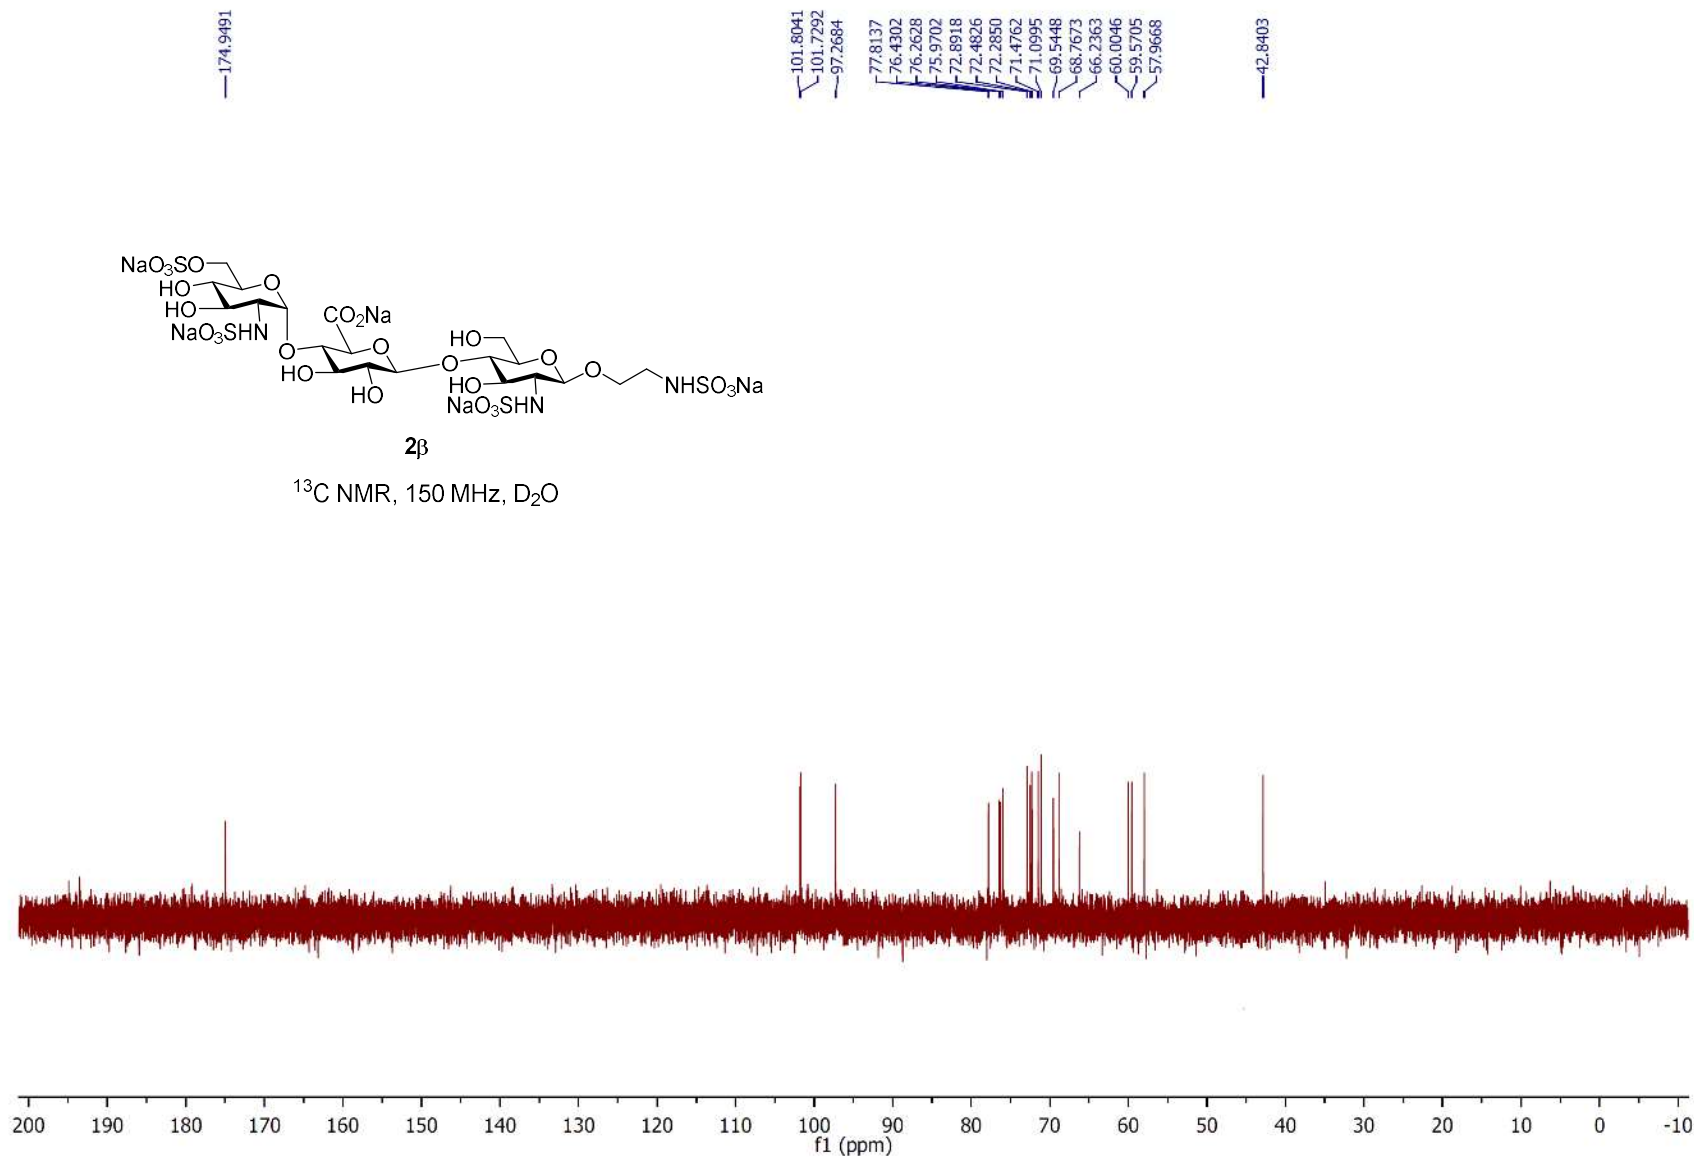

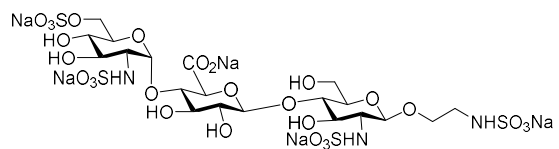

2 $\beta$

$^1\text{H}$ - $^1\text{H}$  COSY, 600 MHz, D<sub>2</sub>O

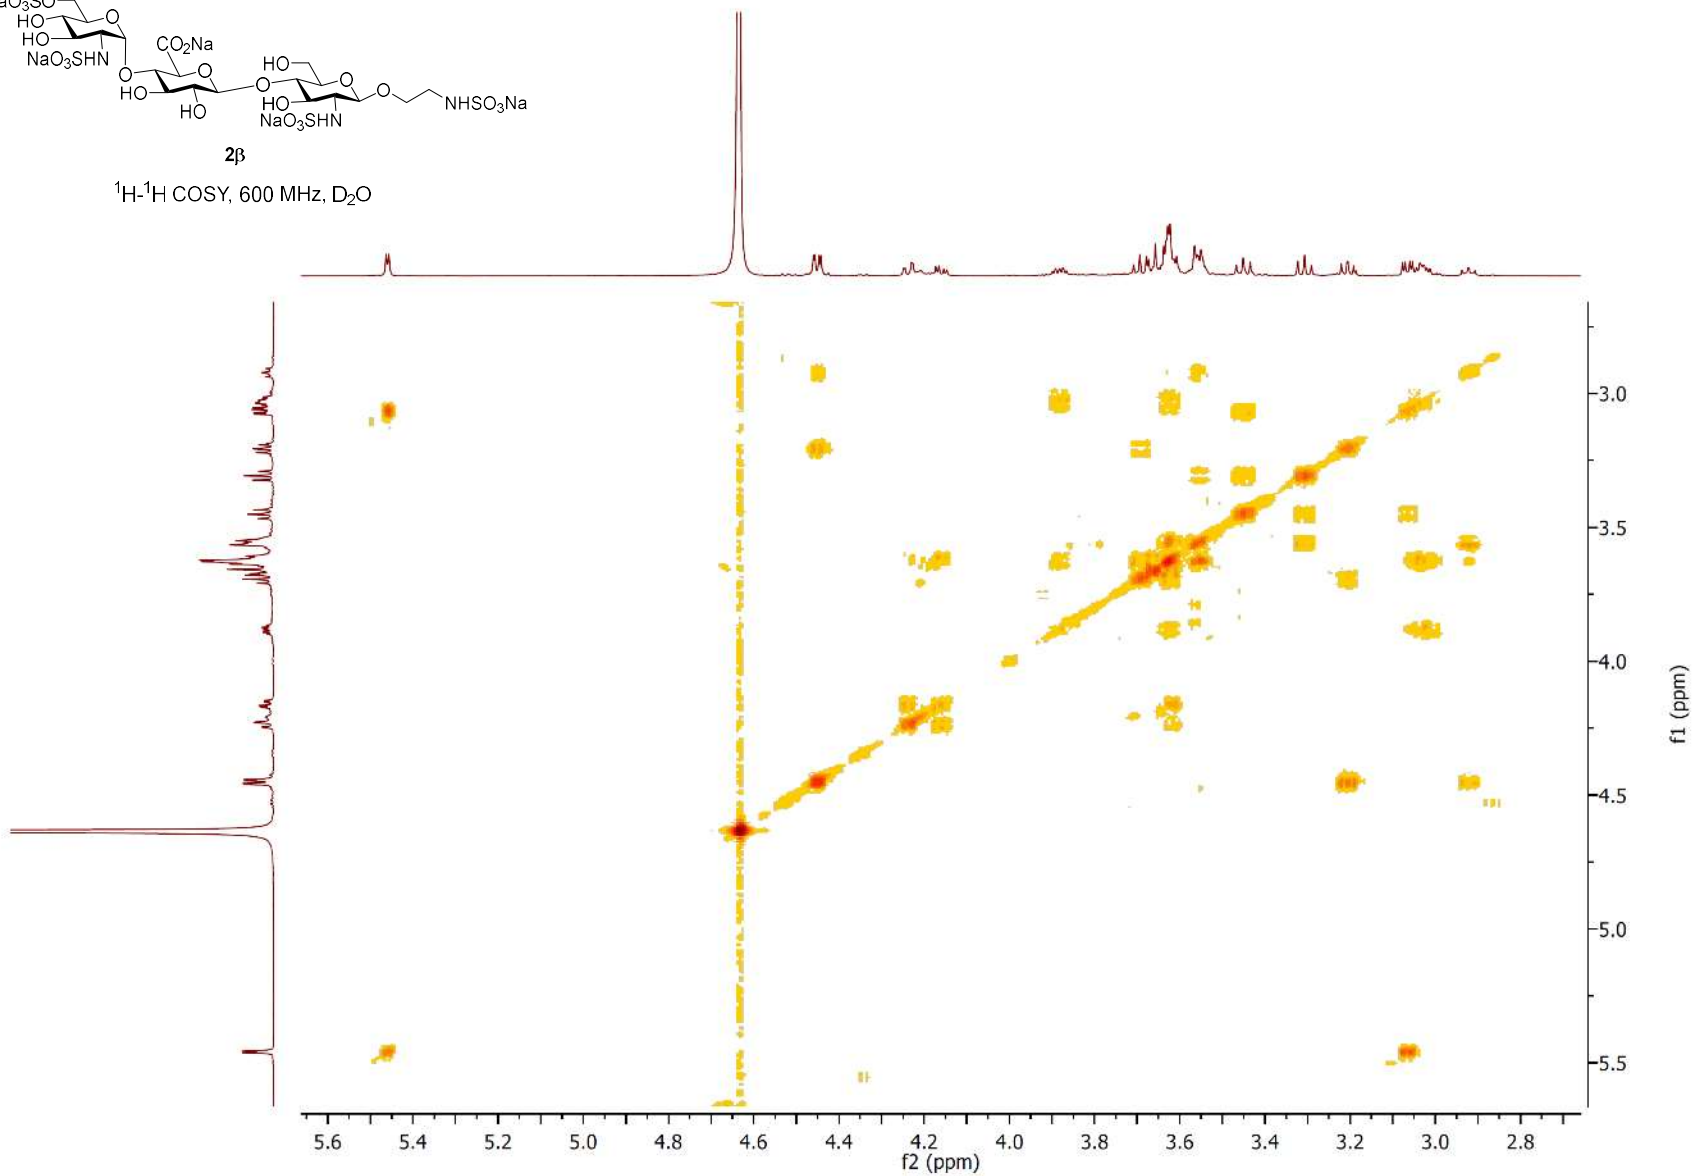

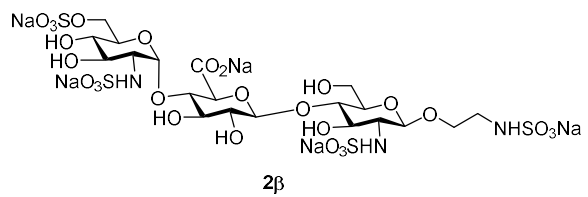

$^1\text{H}$ - $^{13}\text{C}$  HSQC, 600/150MHz,  $\text{D}_2\text{O}$

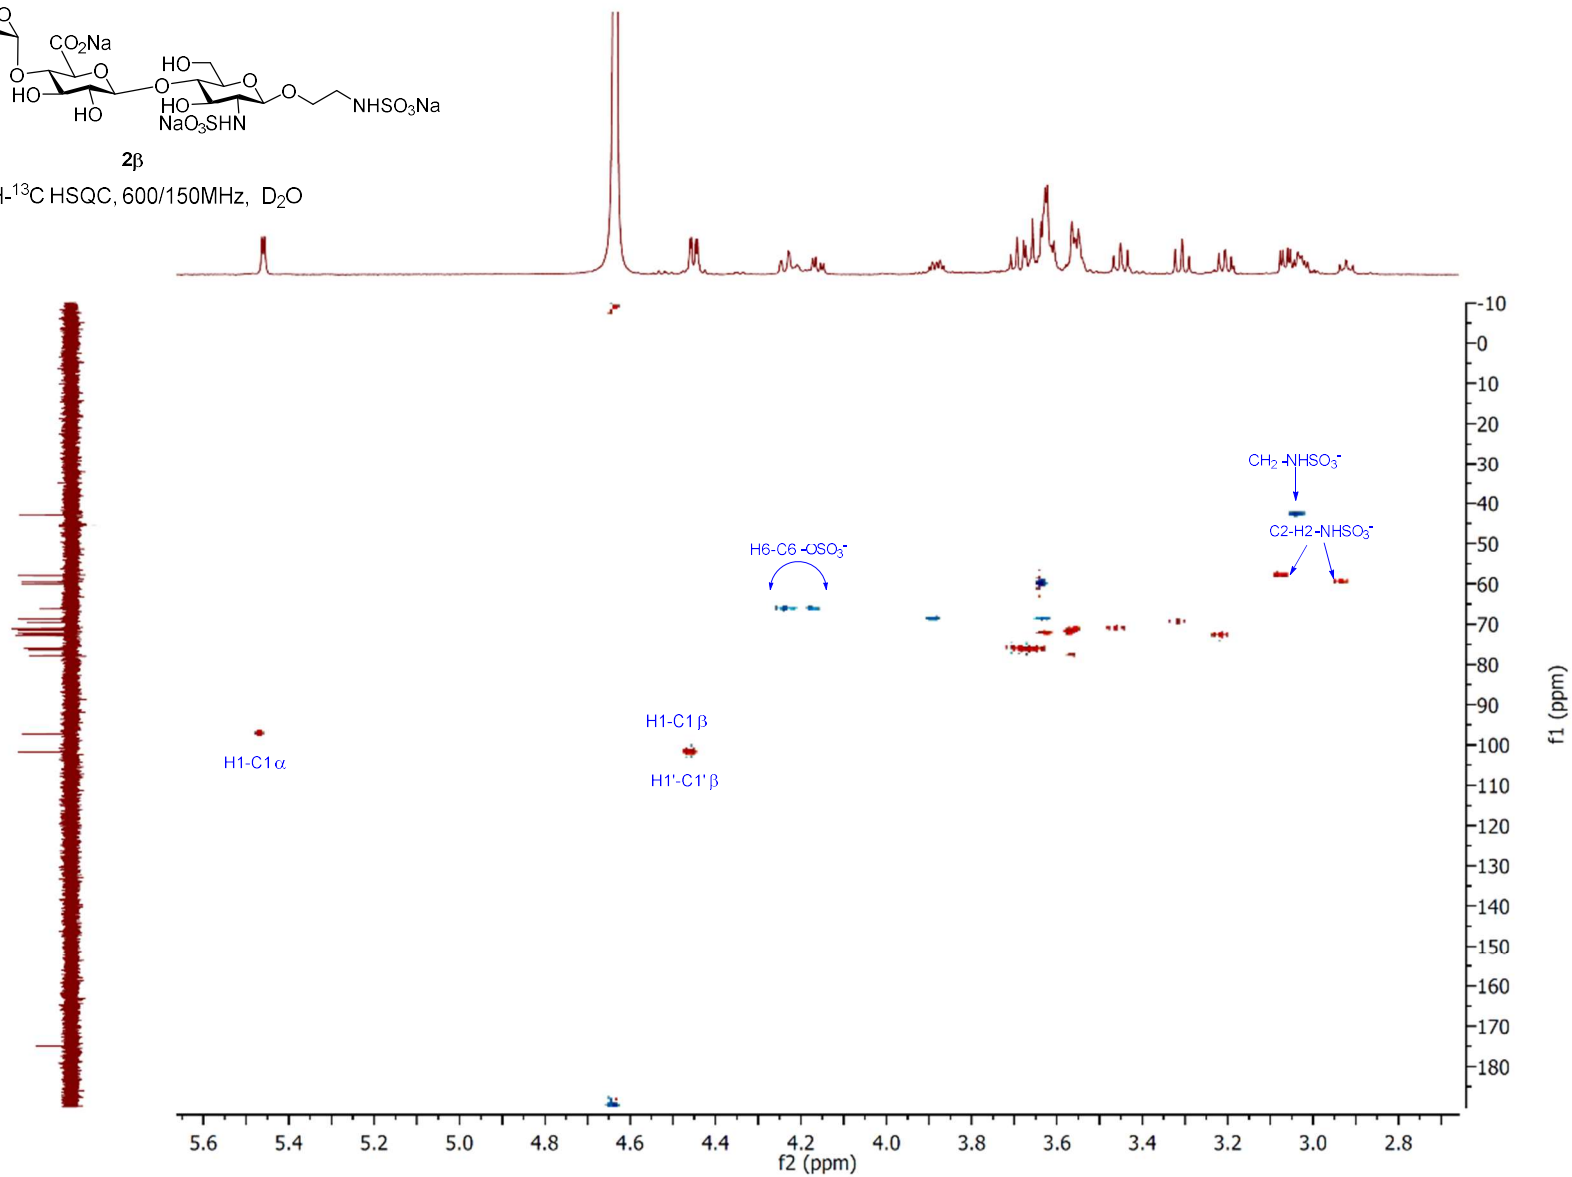



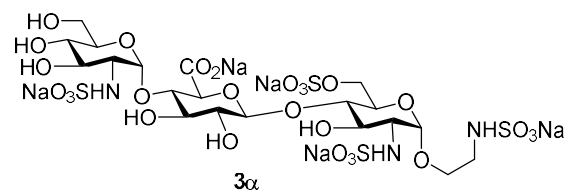

<sup>1</sup>H NMR, 600 MHz, D<sub>2</sub>O

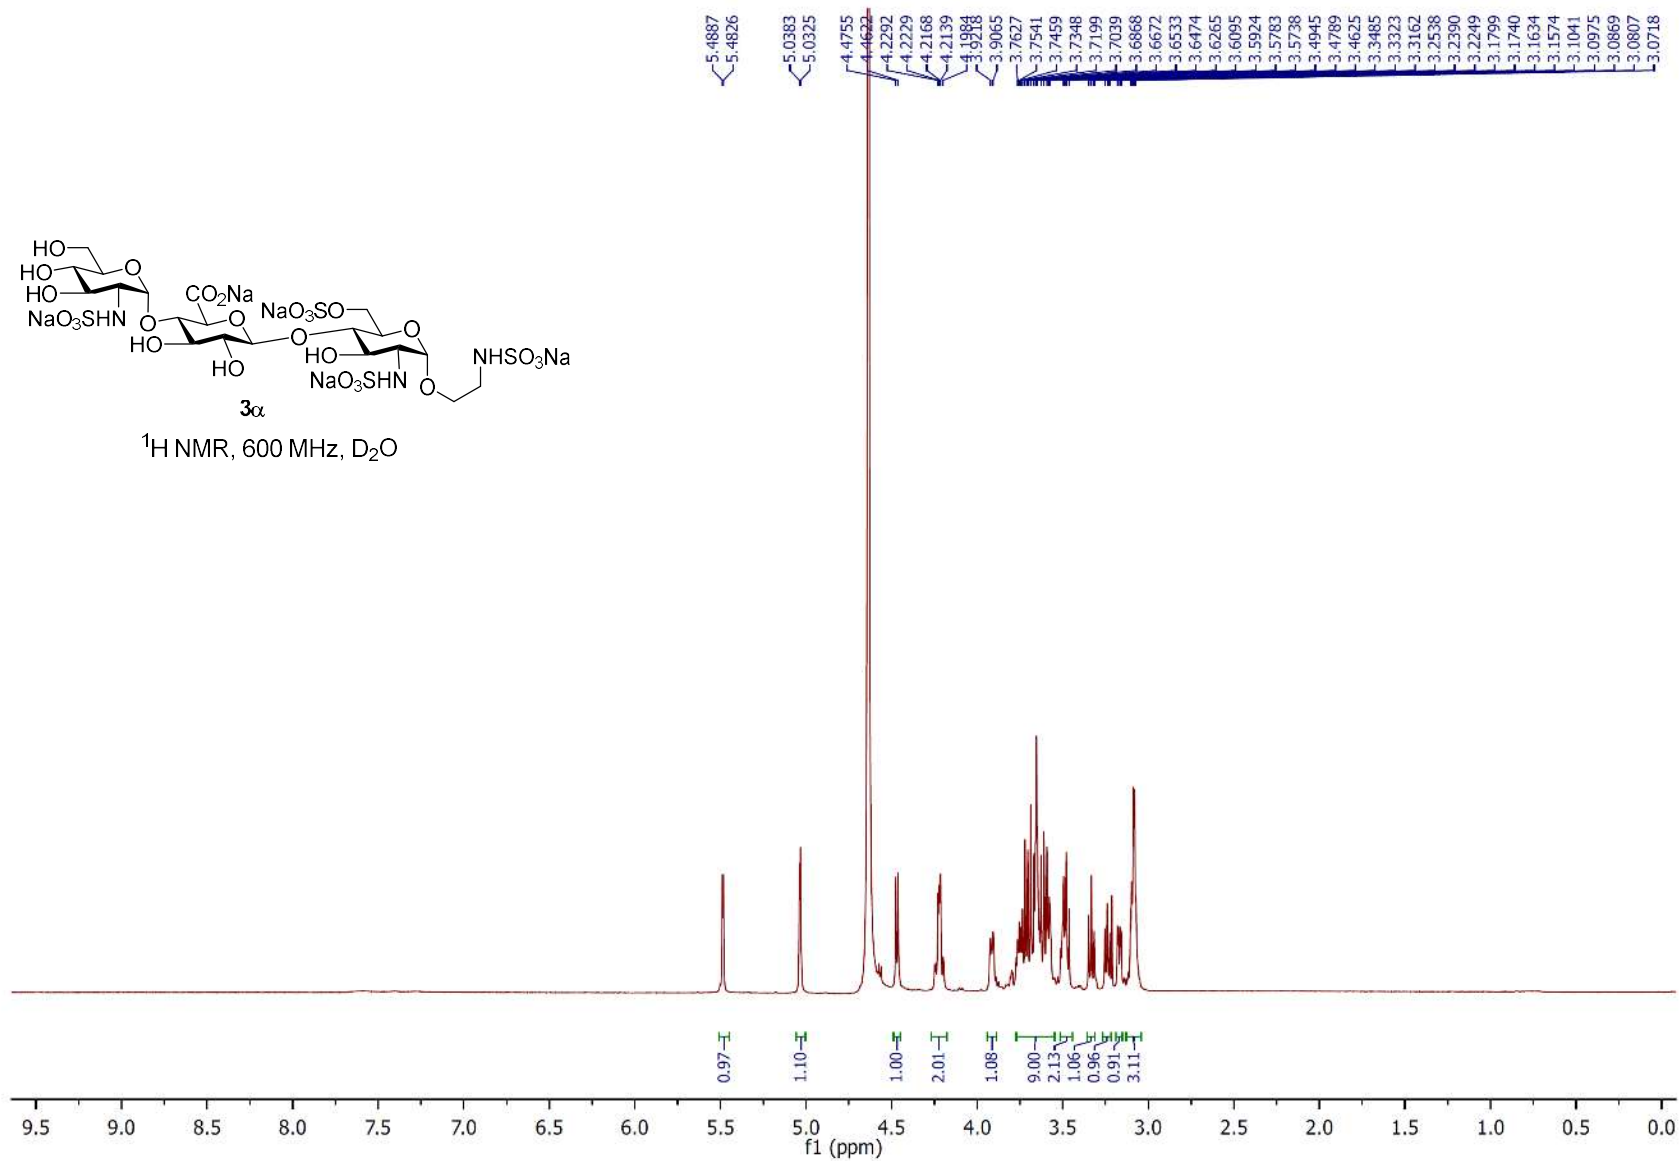

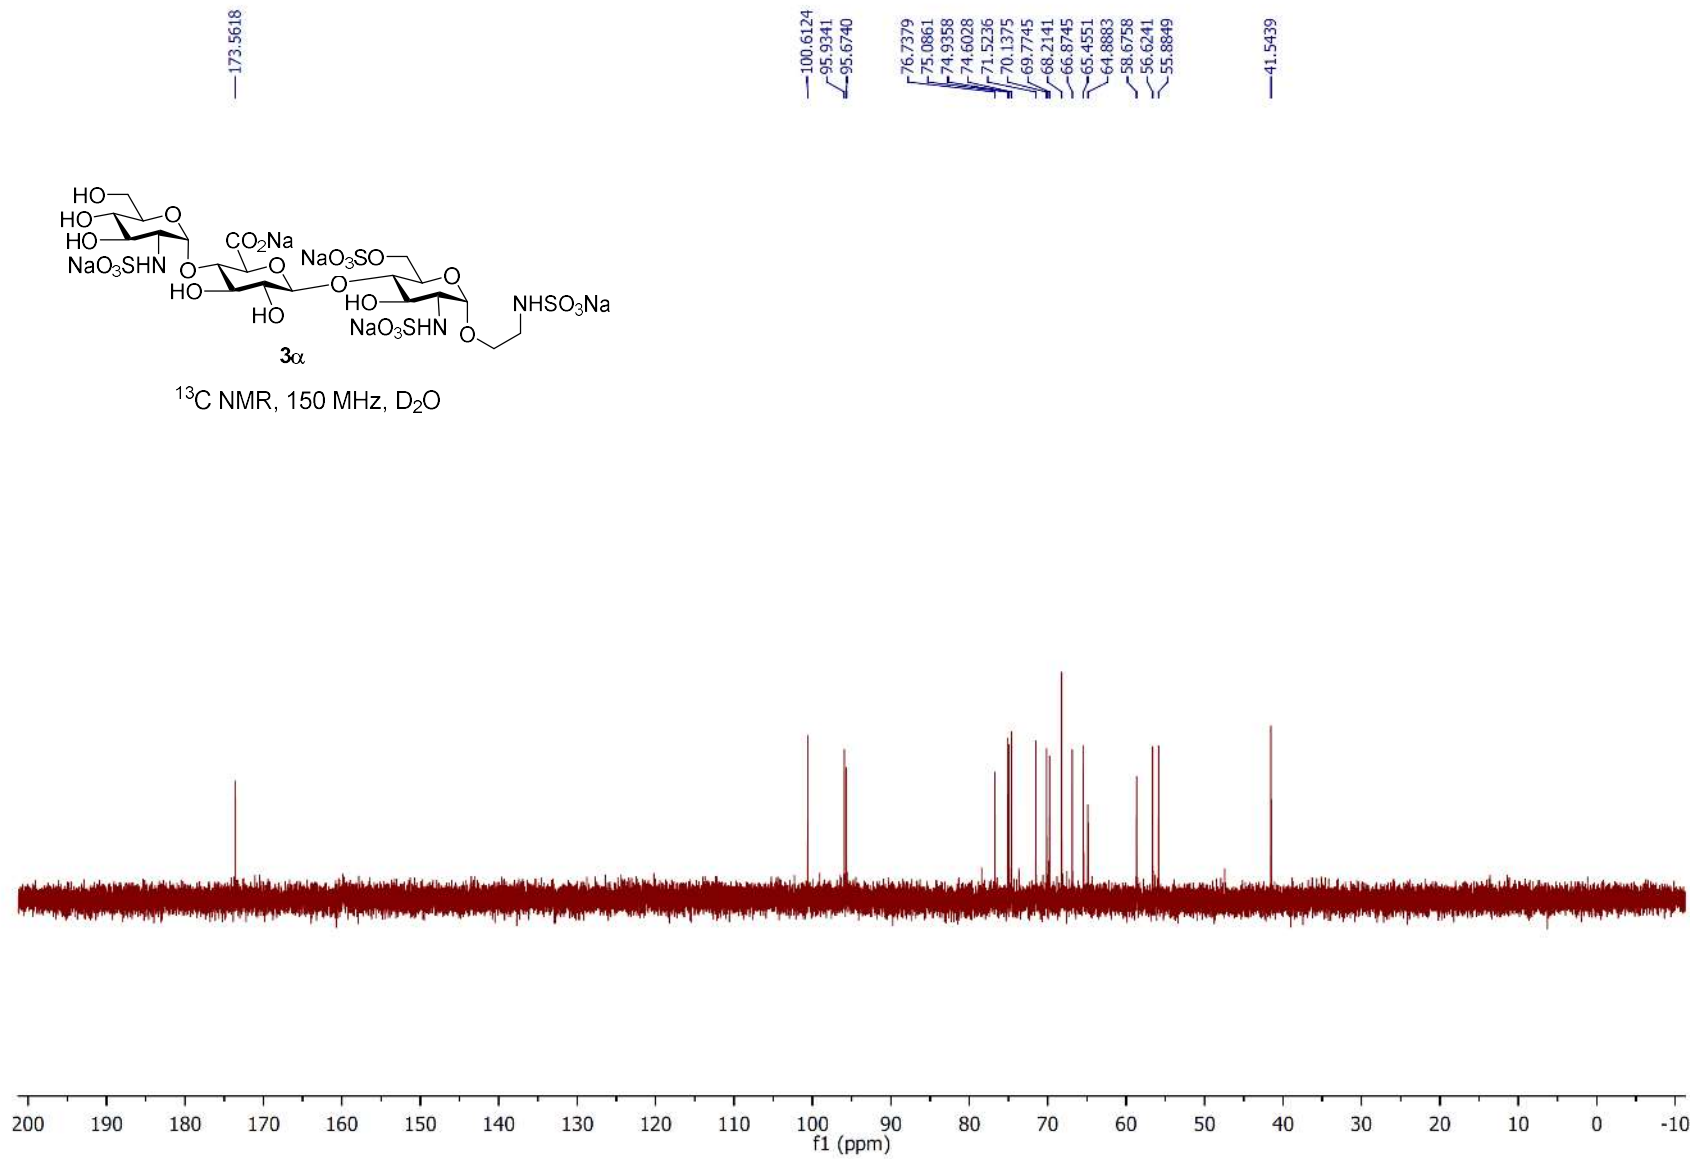

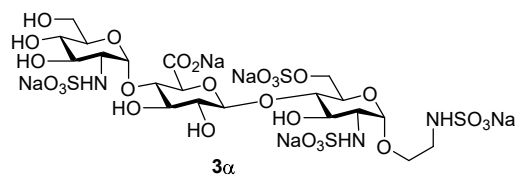

$^1\text{H}$ - $^{13}\text{C}$  HSQC, 600/150MHz, D<sub>2</sub>O

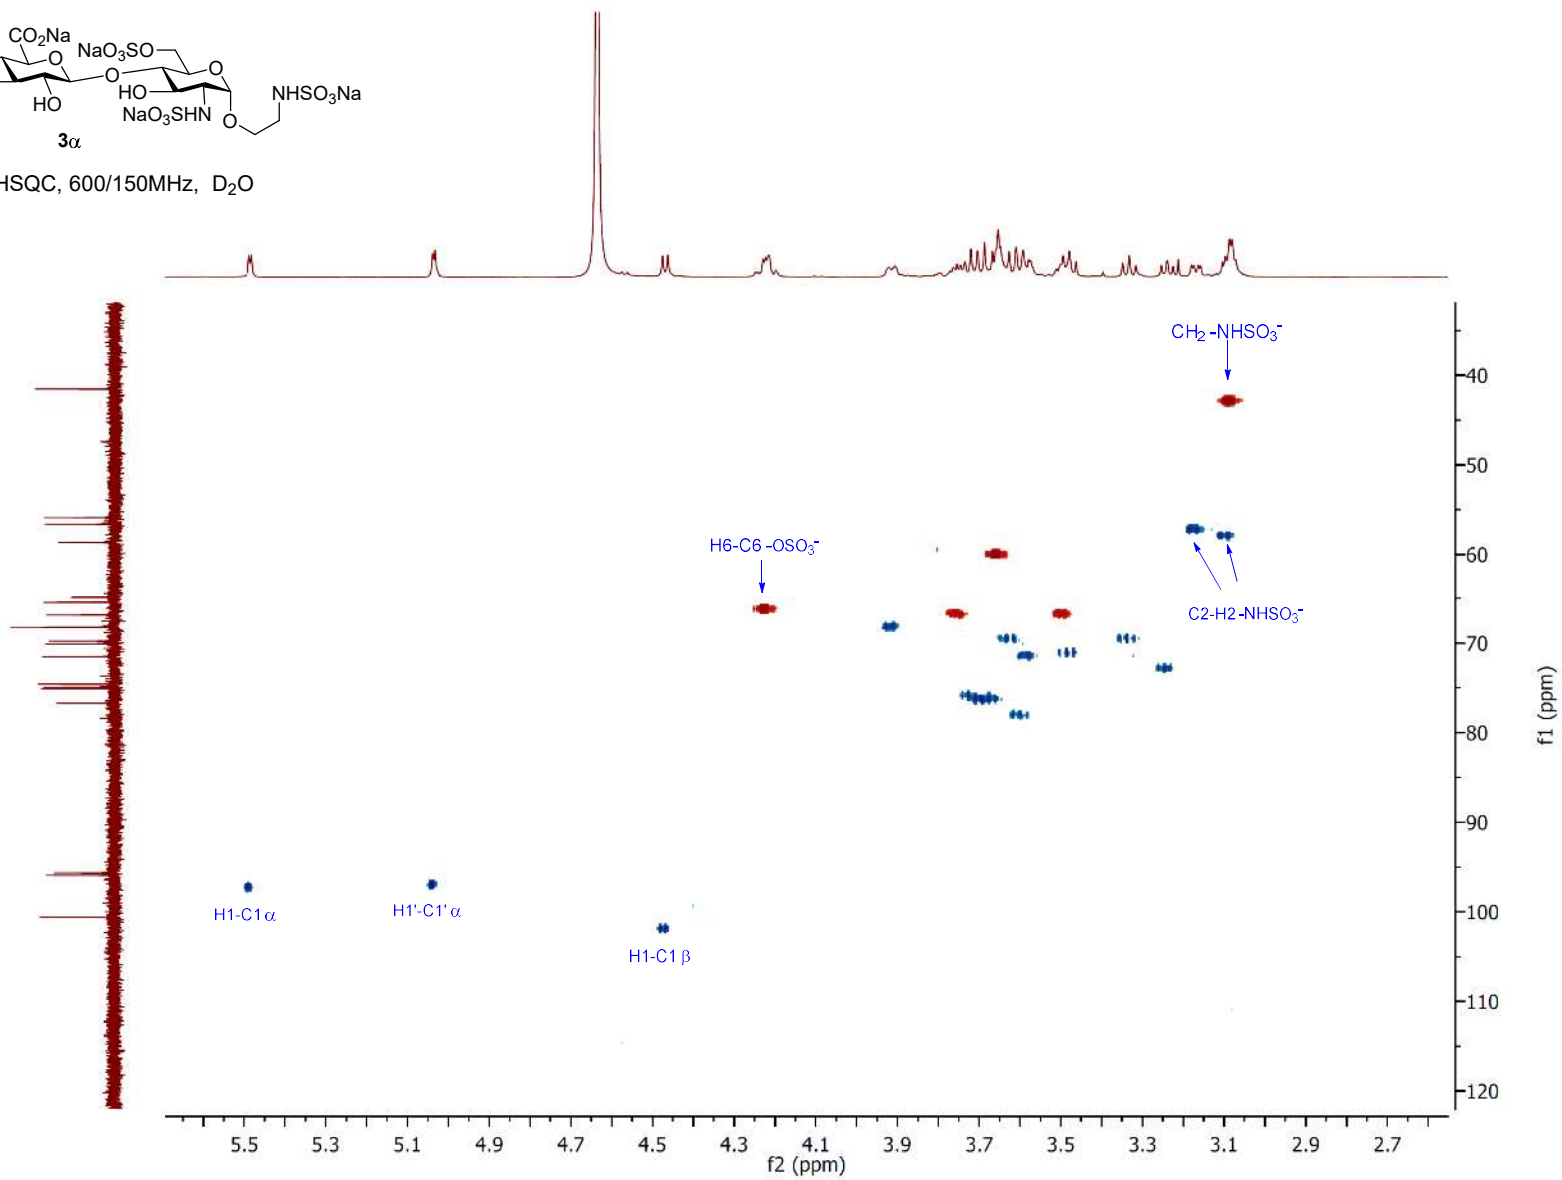

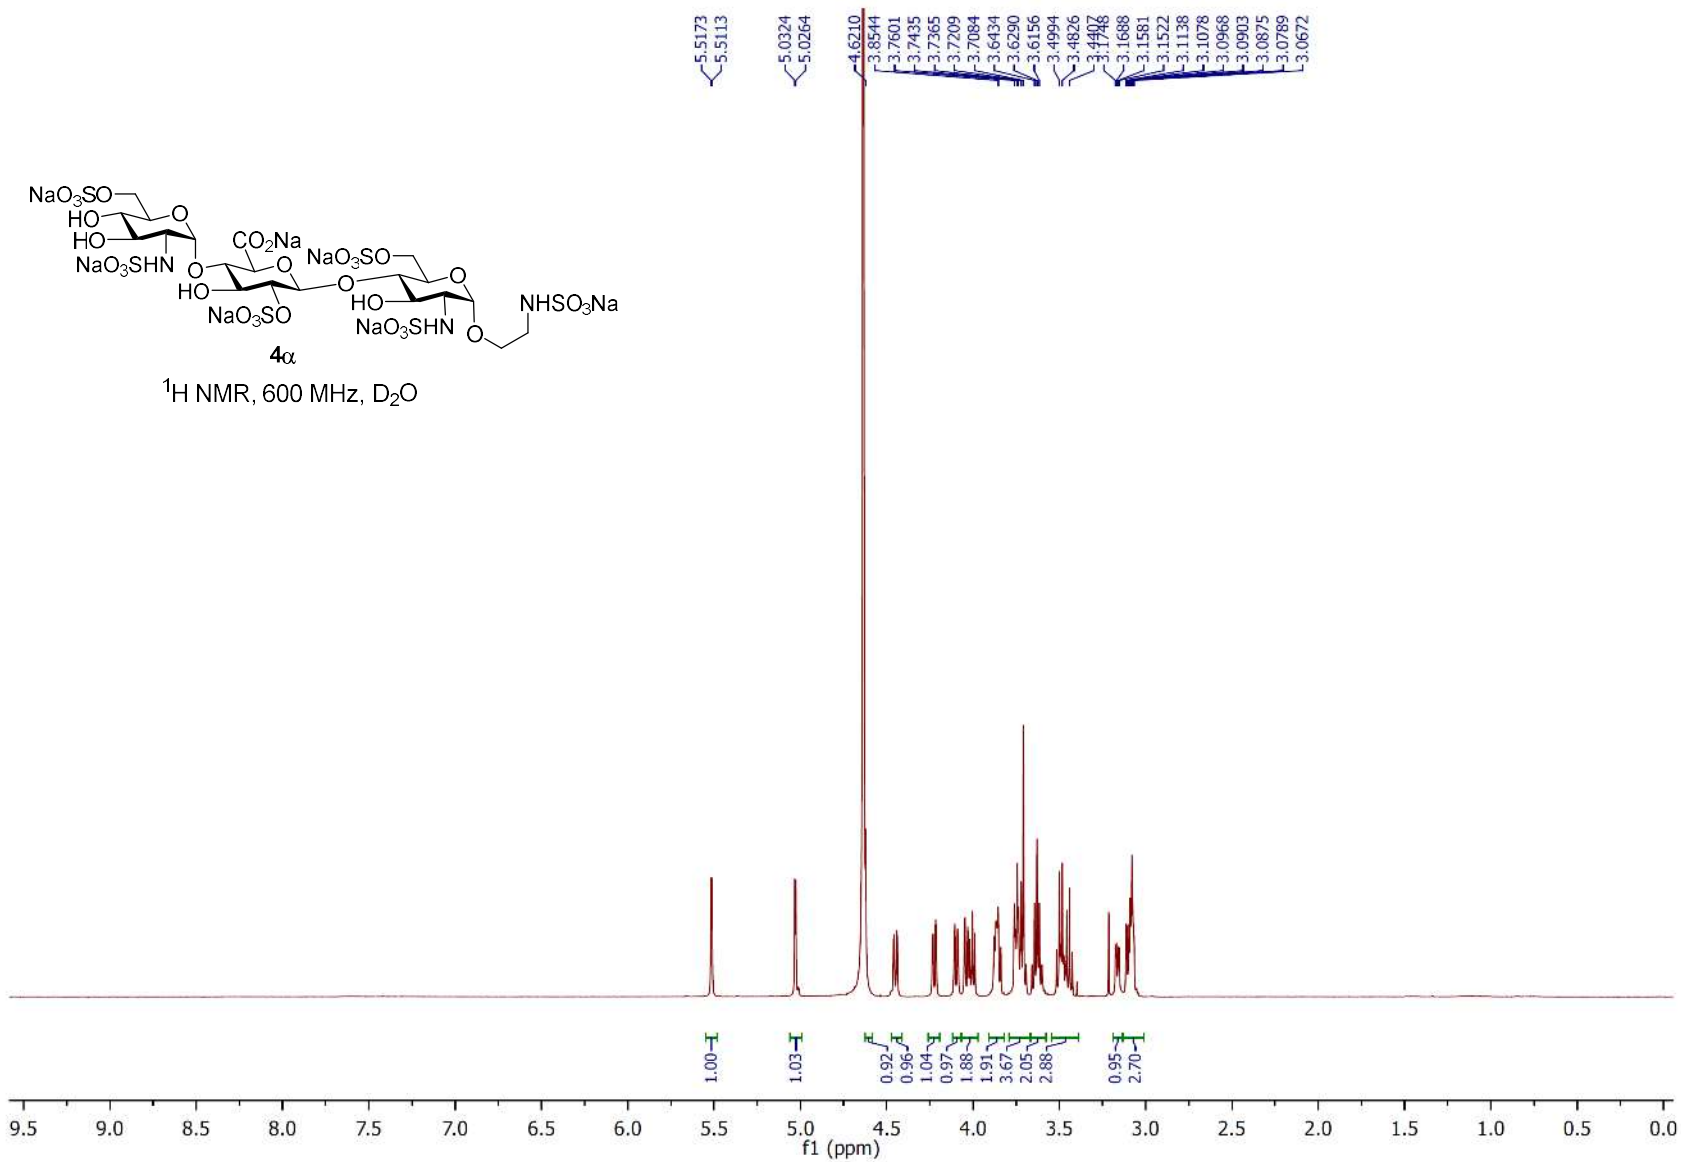

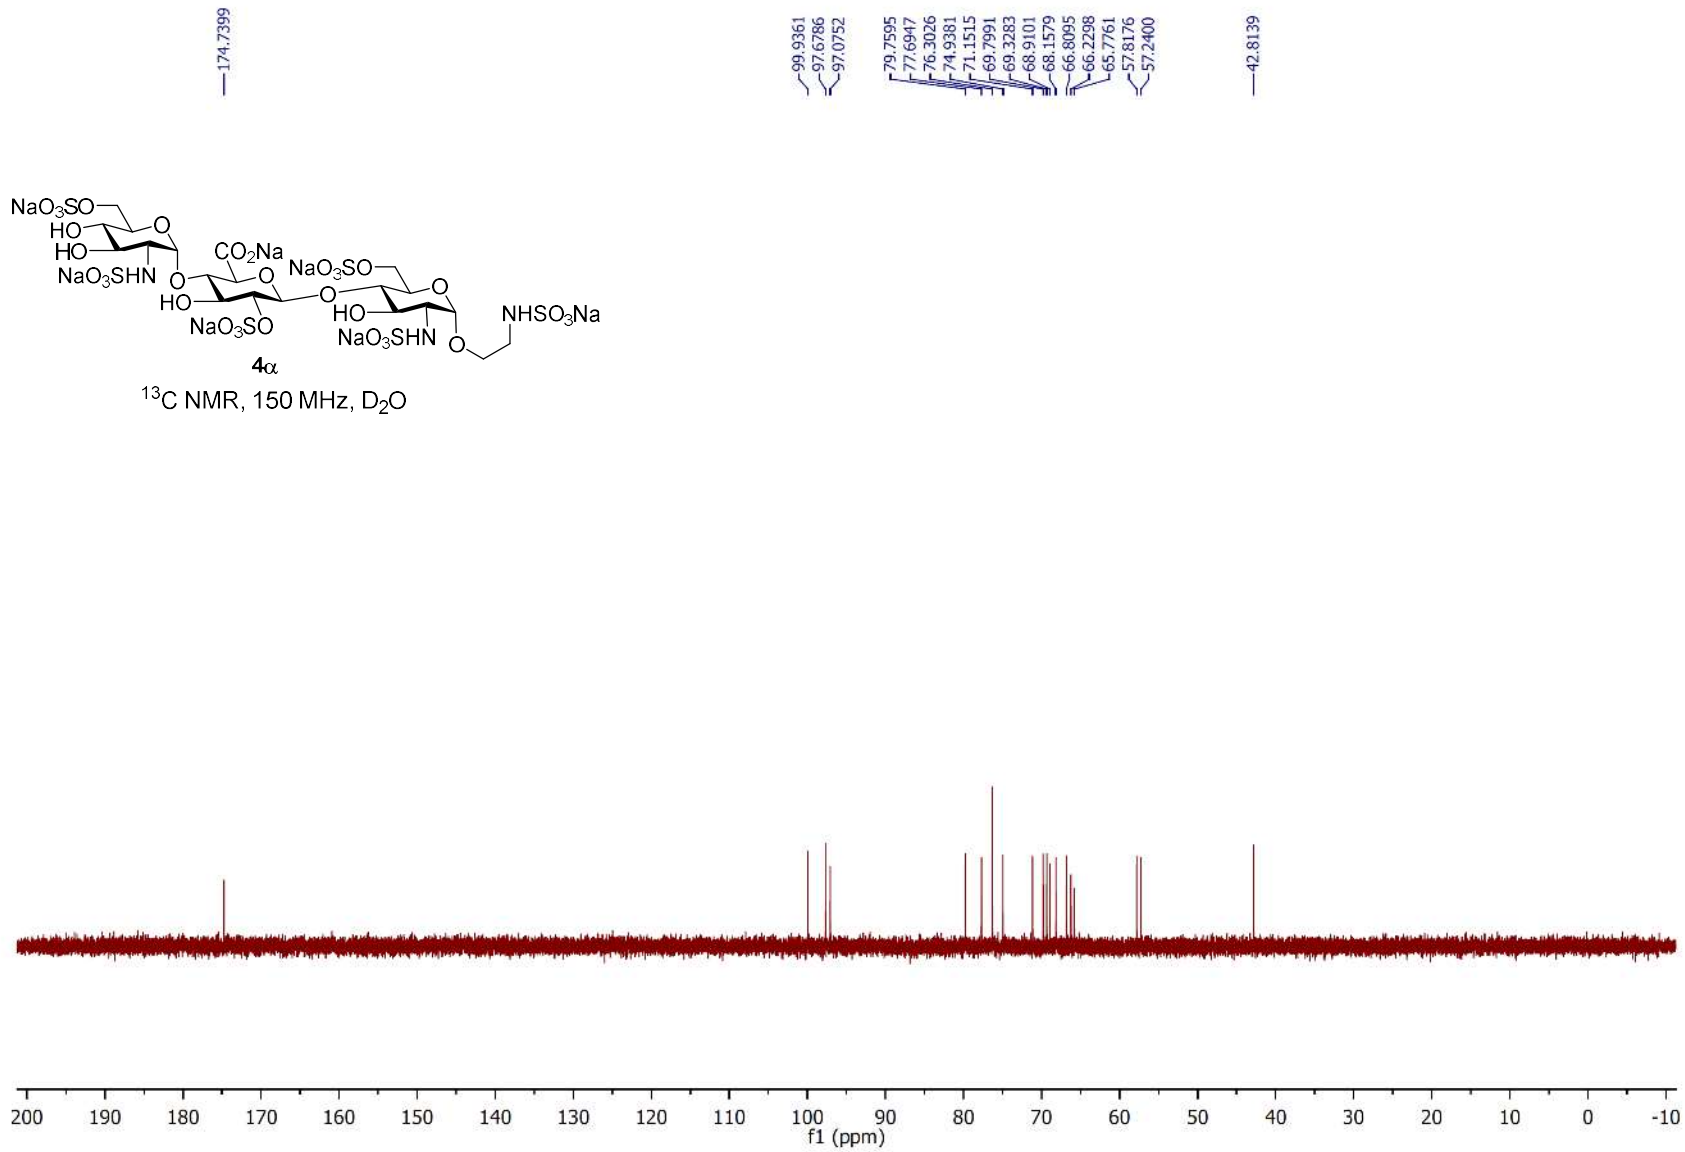

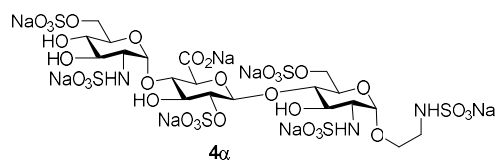

$^1\text{H}$ - $^{13}\text{C}$  HSQC, 600/150MHz,  $\text{D}_2\text{O}$

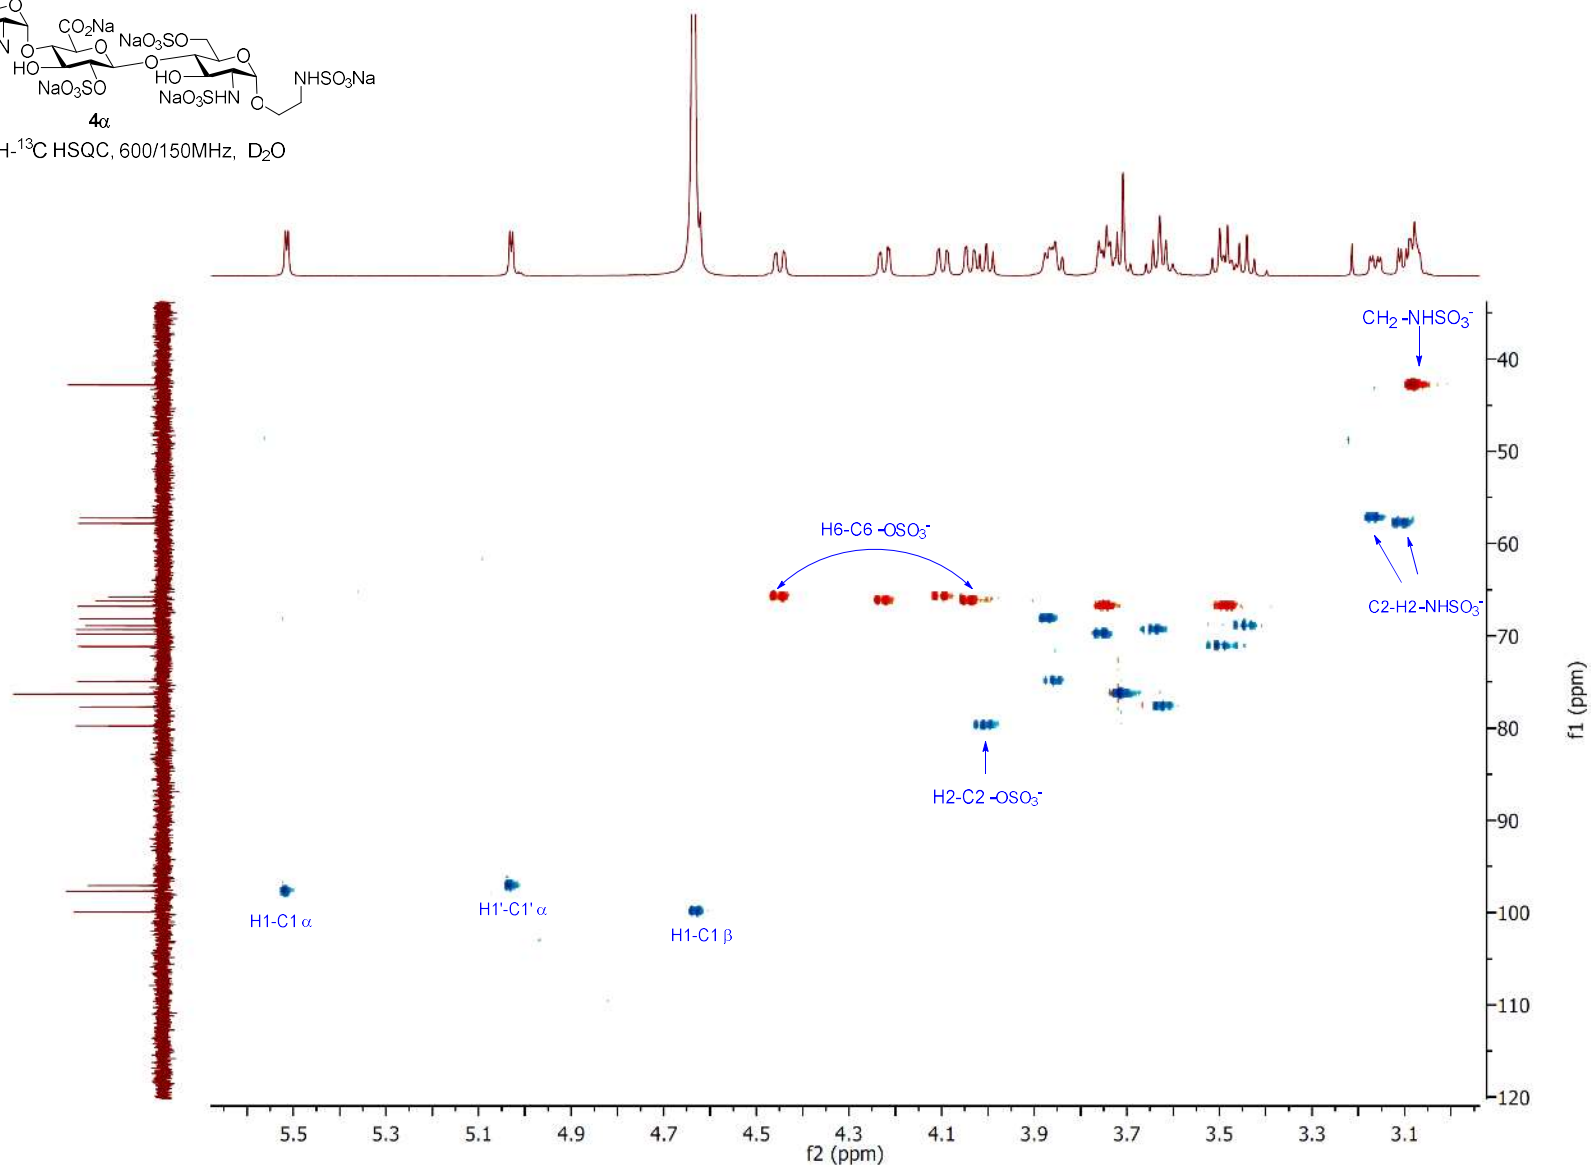

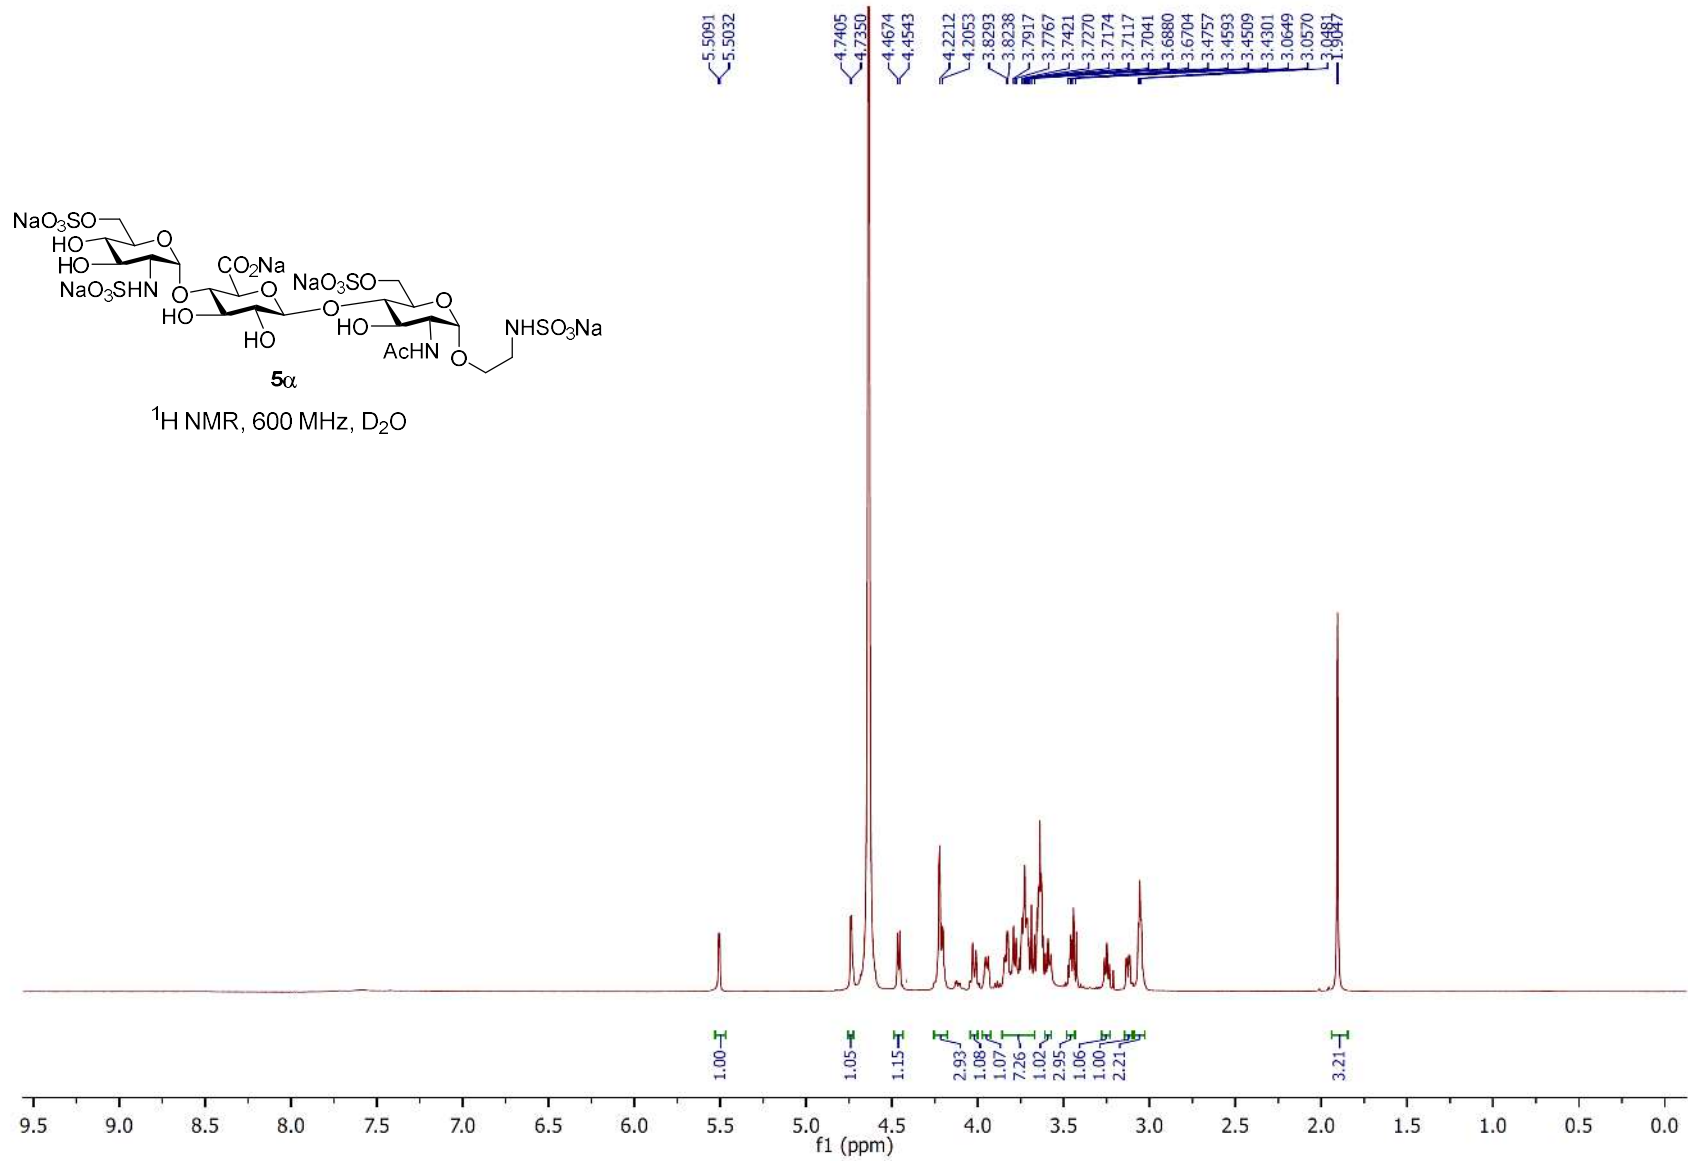

174.7443  
174.3234

102.1017  
97.2904  
96.8323

78.4094  
76.2726  
76.1342  
76.0070  
72.8358  
71.0144  
69.6629  
69.3771  
68.8985  
68.4860  
66.7041  
66.2526  
57.8184

52.9789

42.9011

21.8361

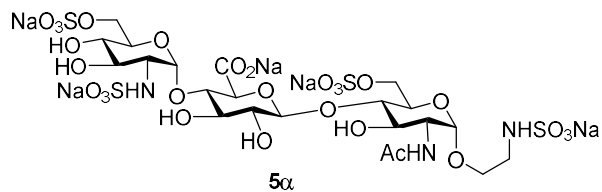

<sup>13</sup>C NMR, 150 MHz, D<sub>2</sub>O

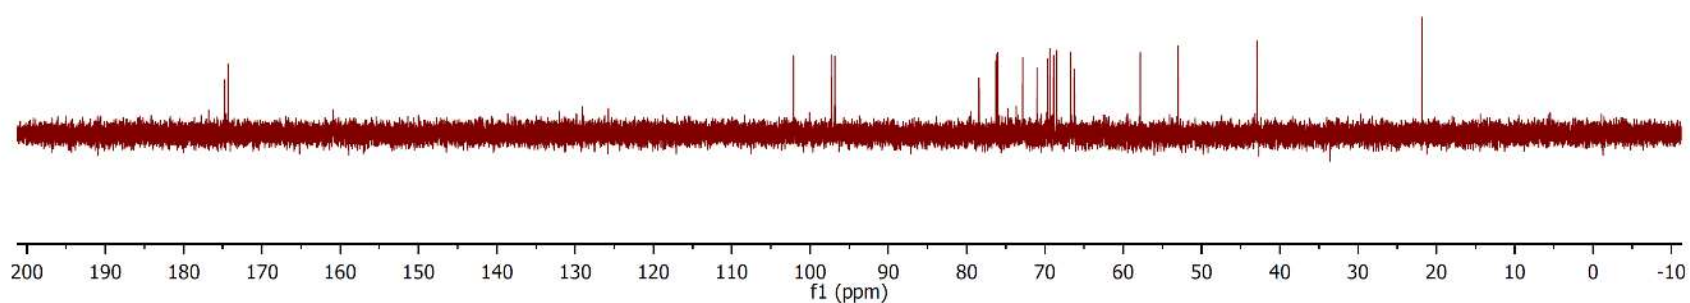



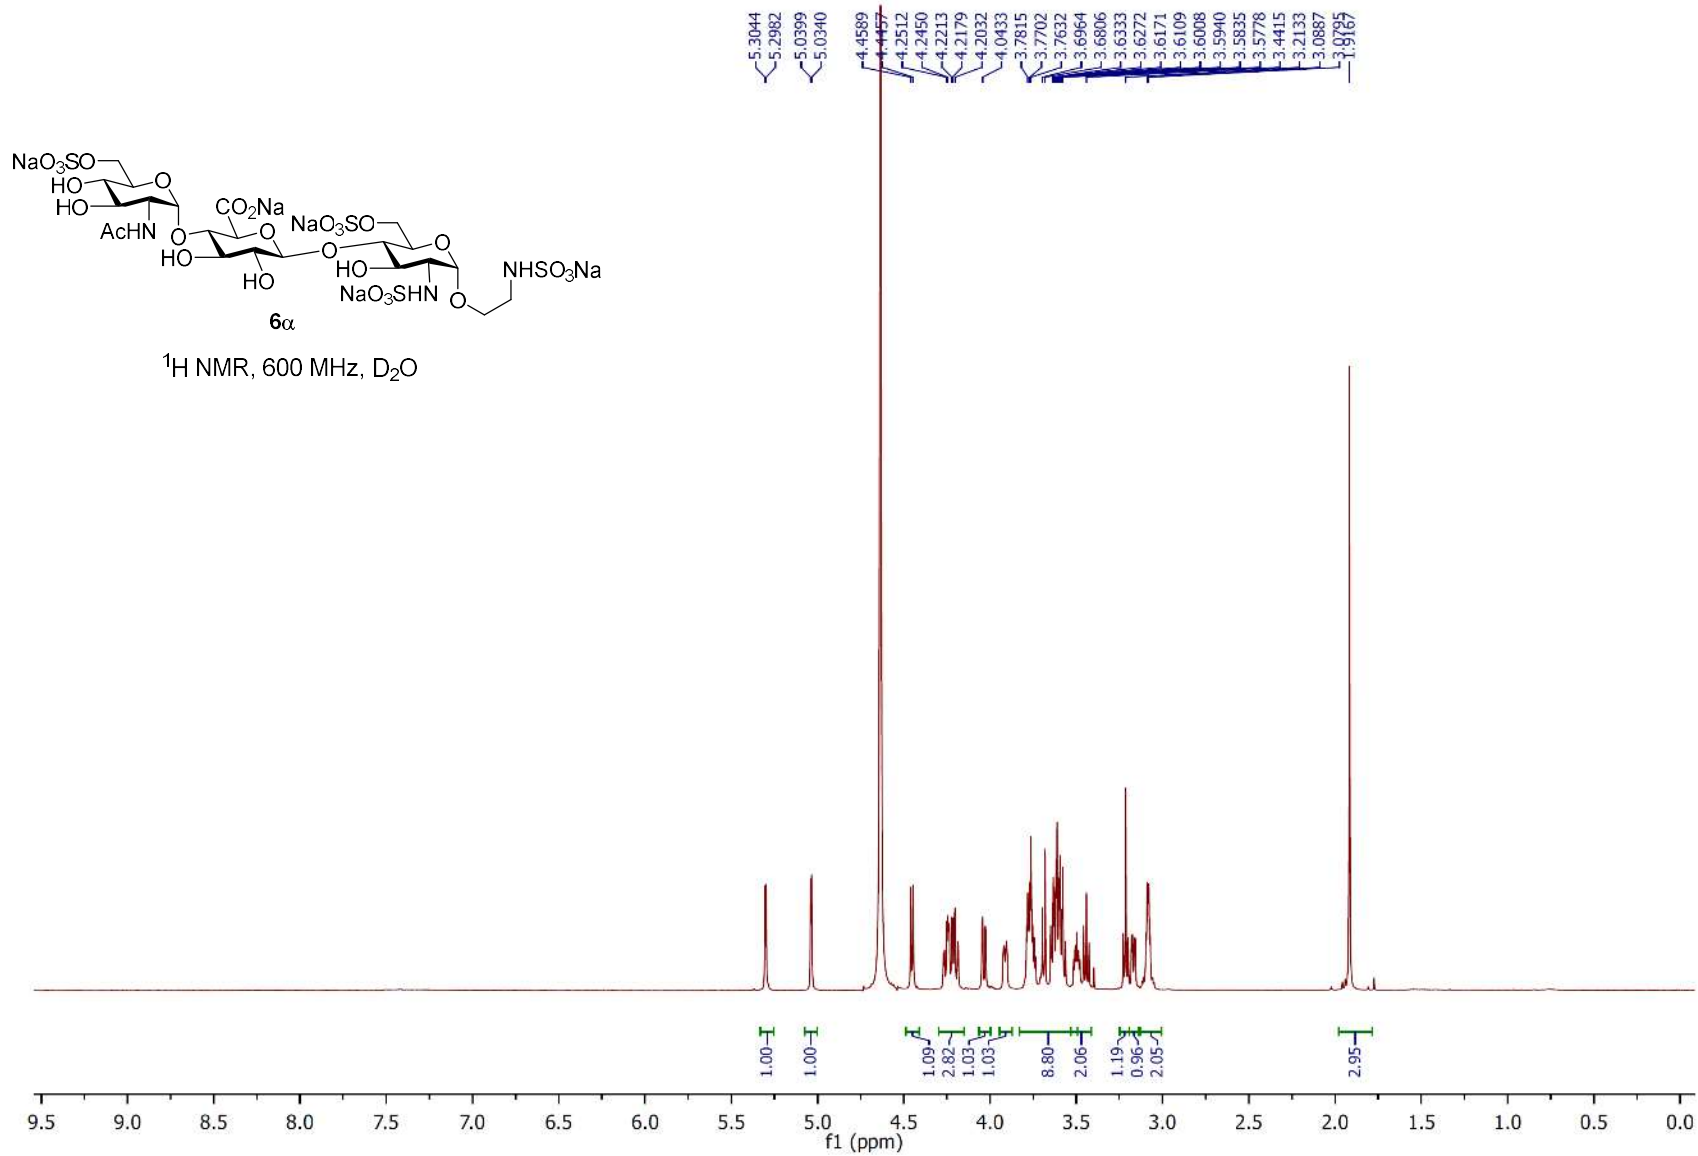

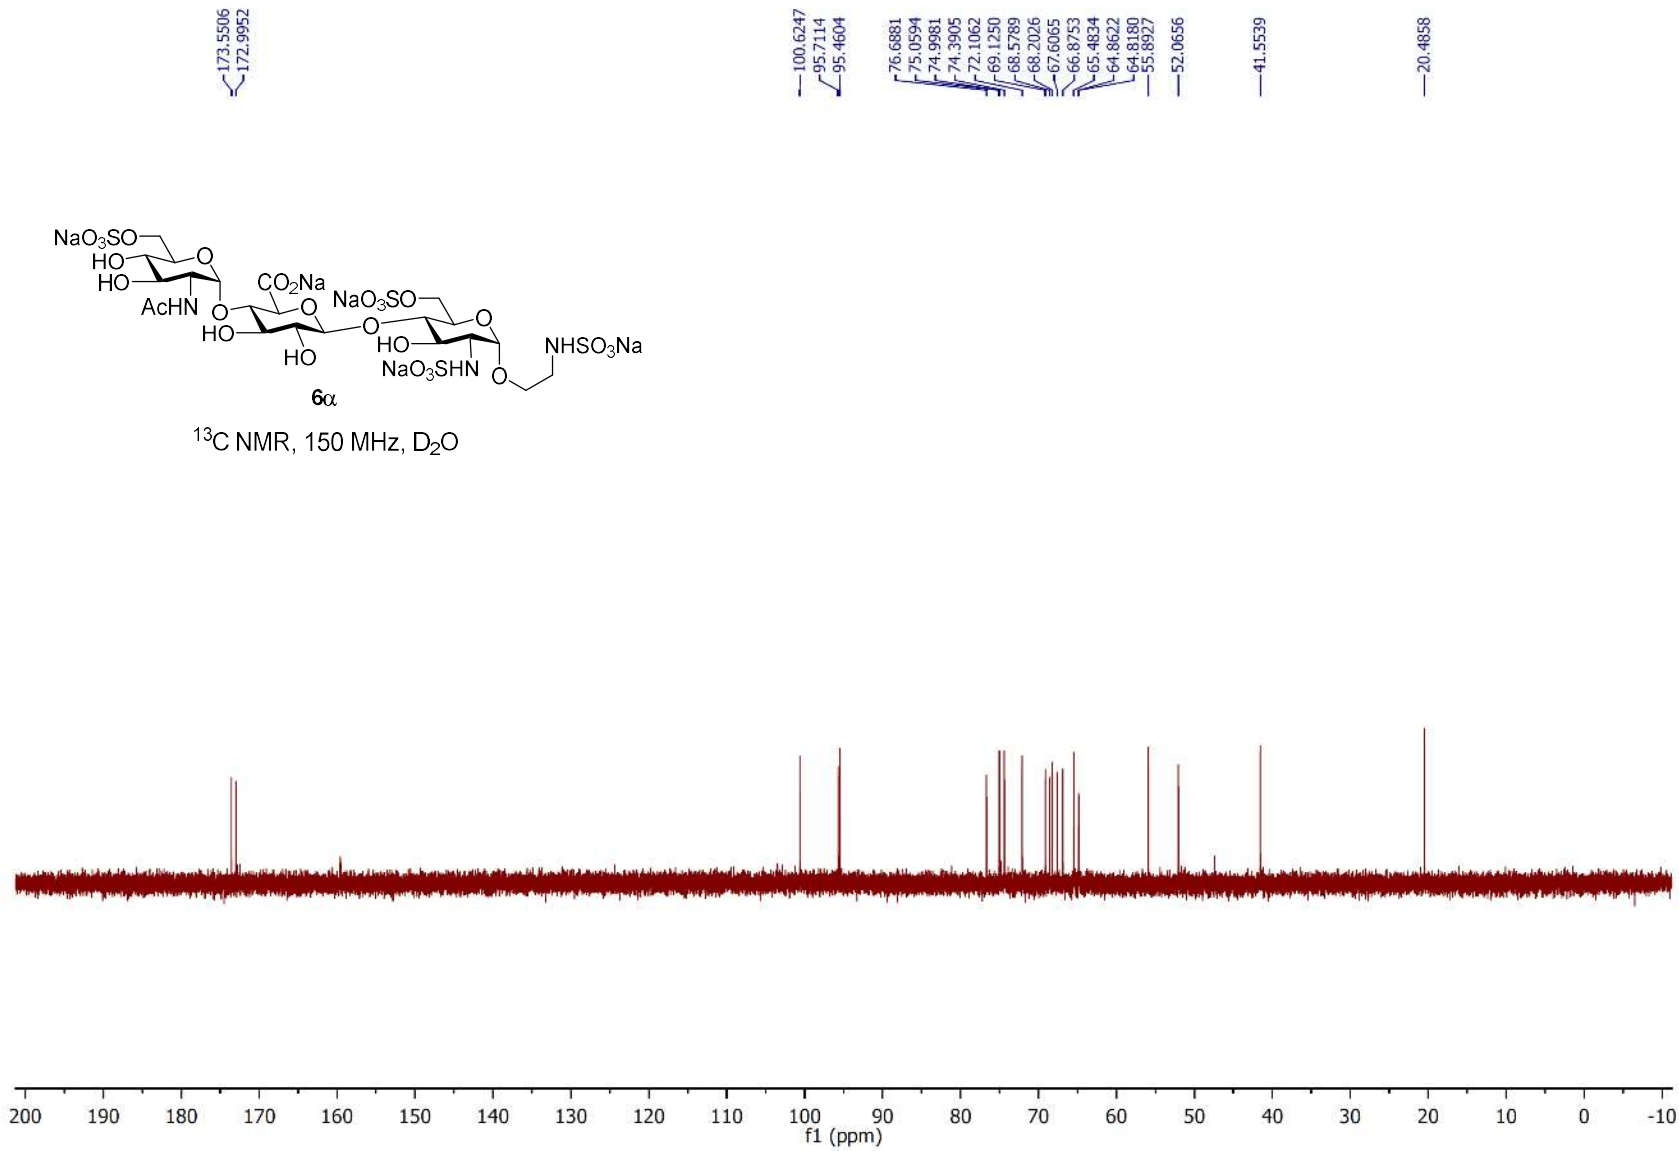

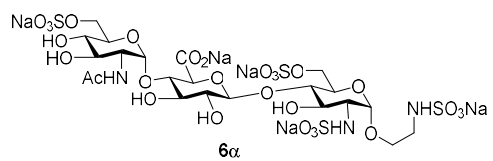

$^1\text{H}$ - $^{13}\text{C}$  HSQC, 600/150MHz, D<sub>2</sub>O

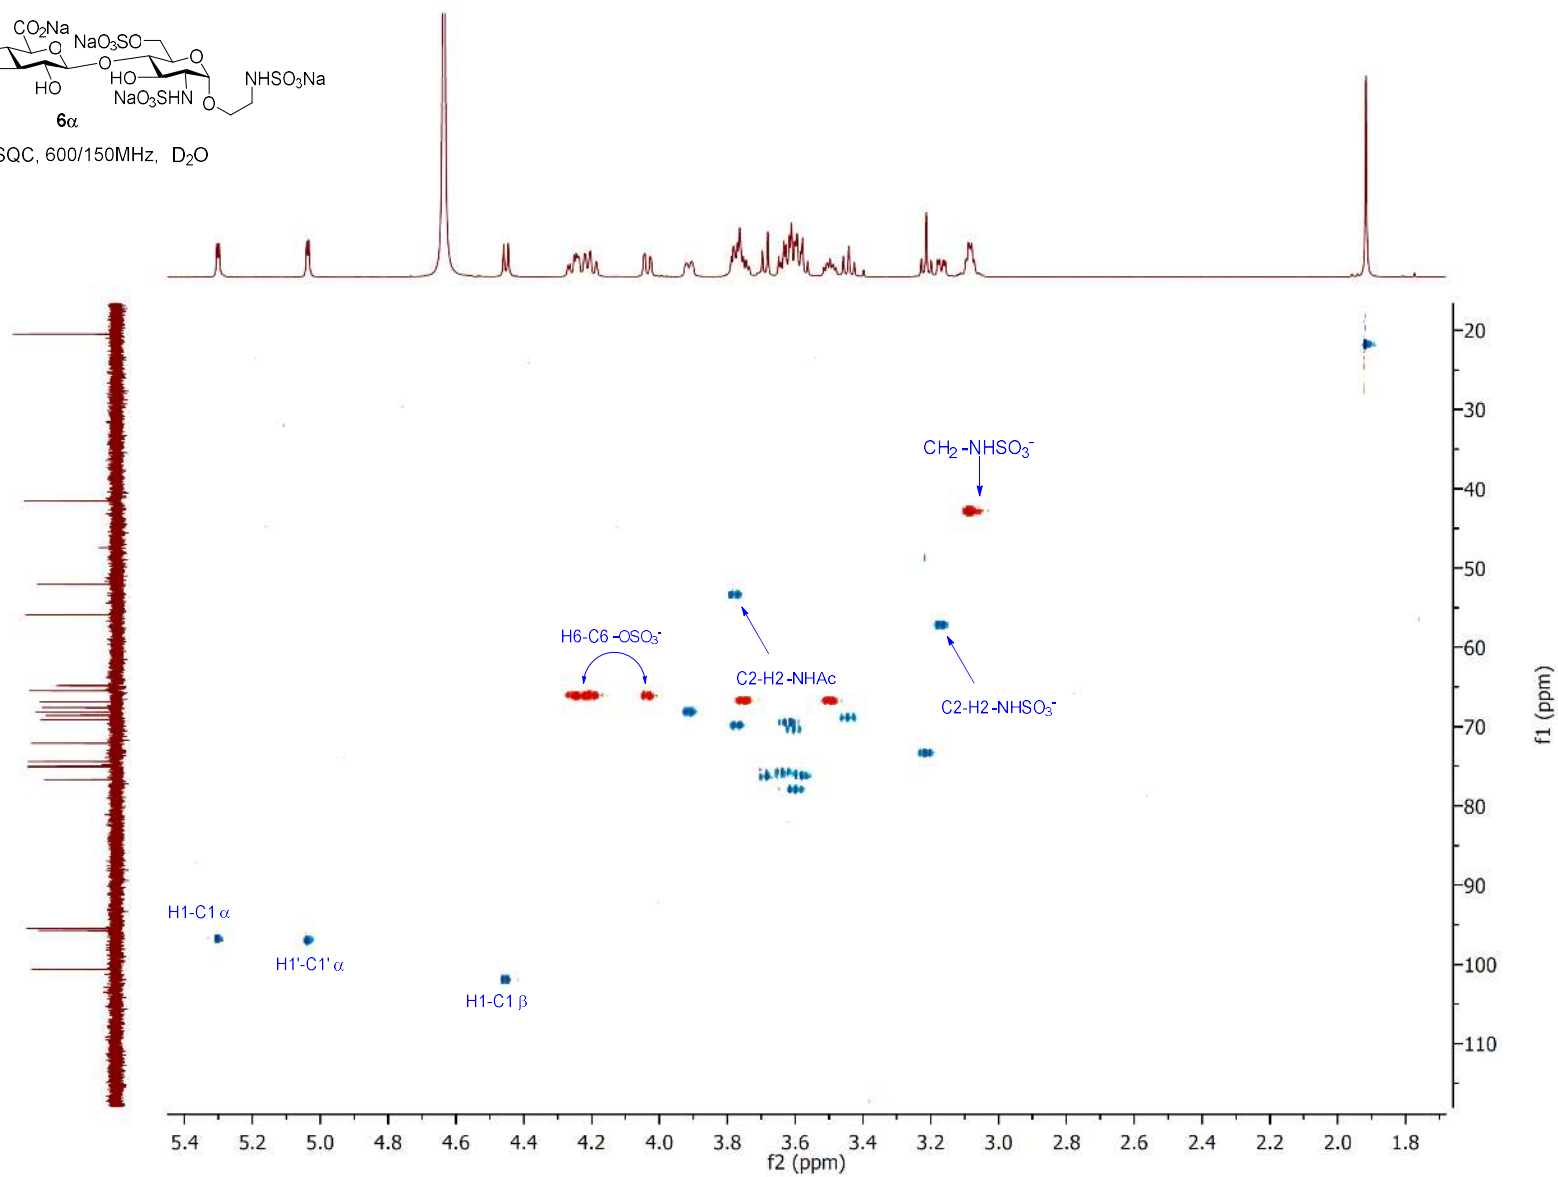

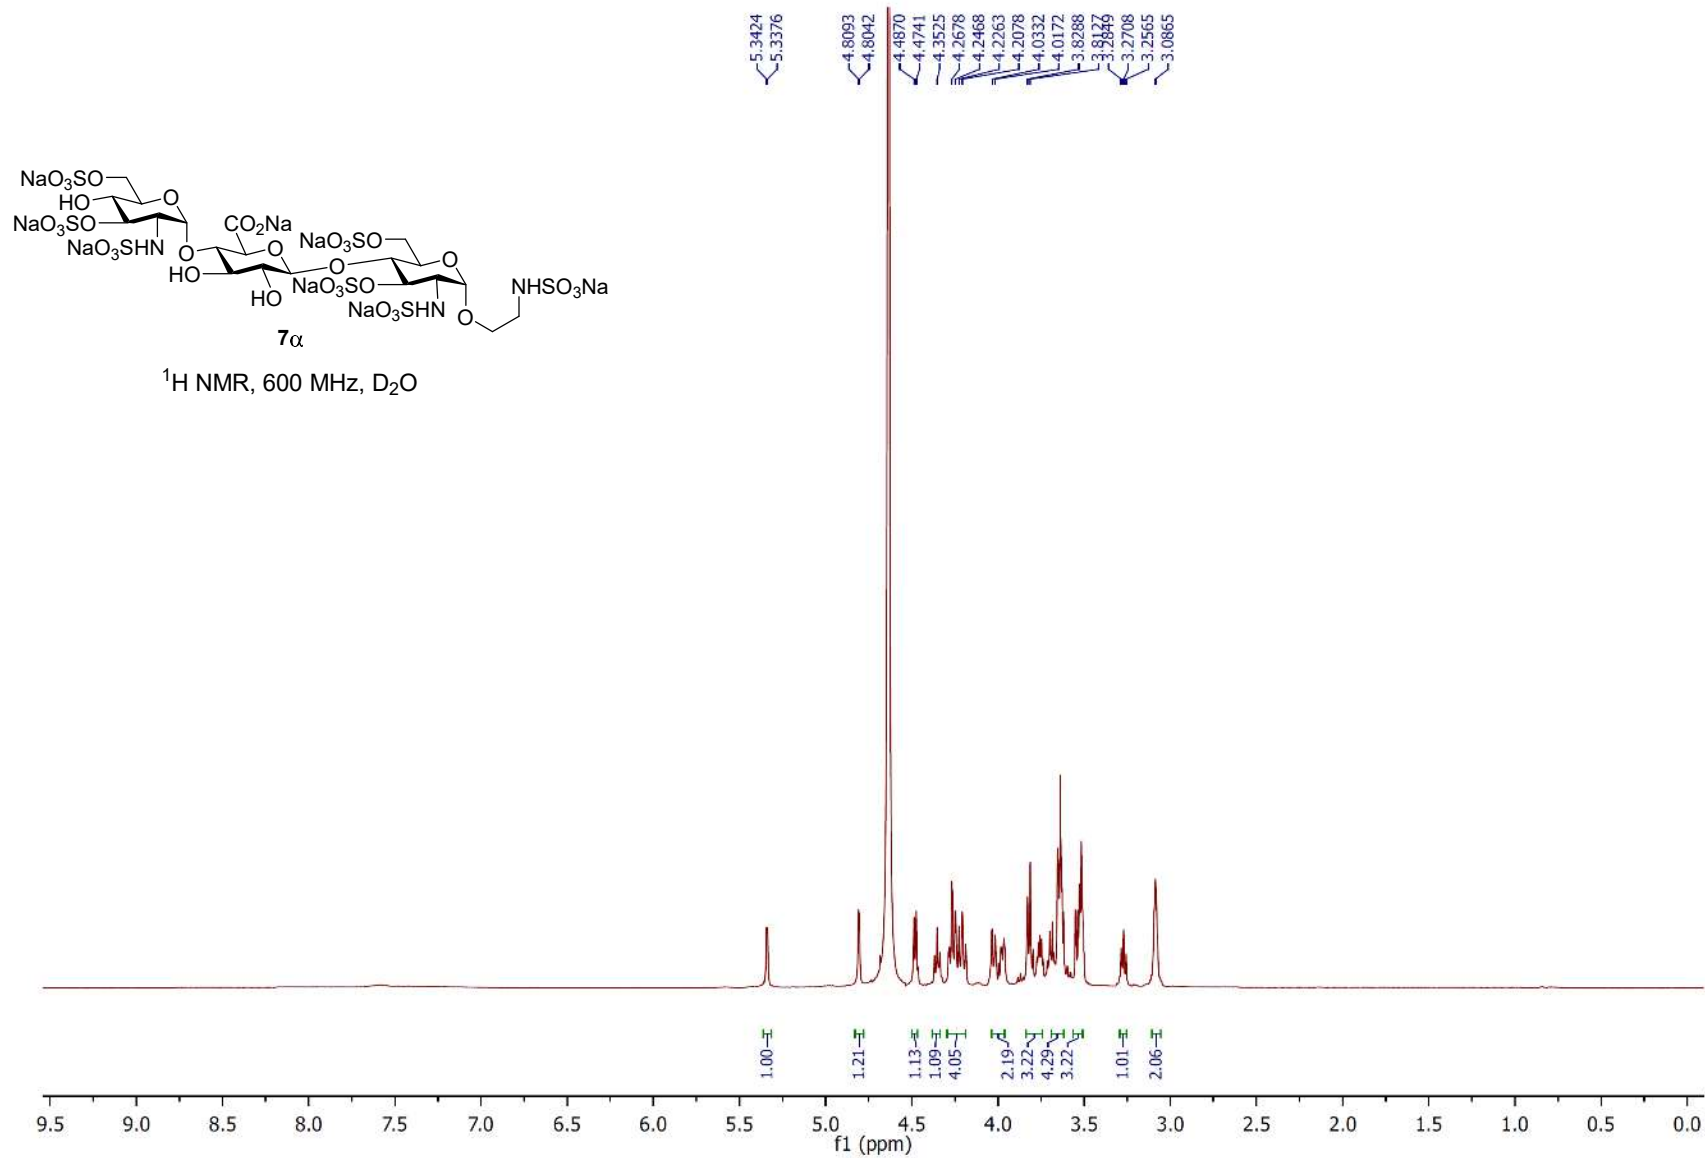

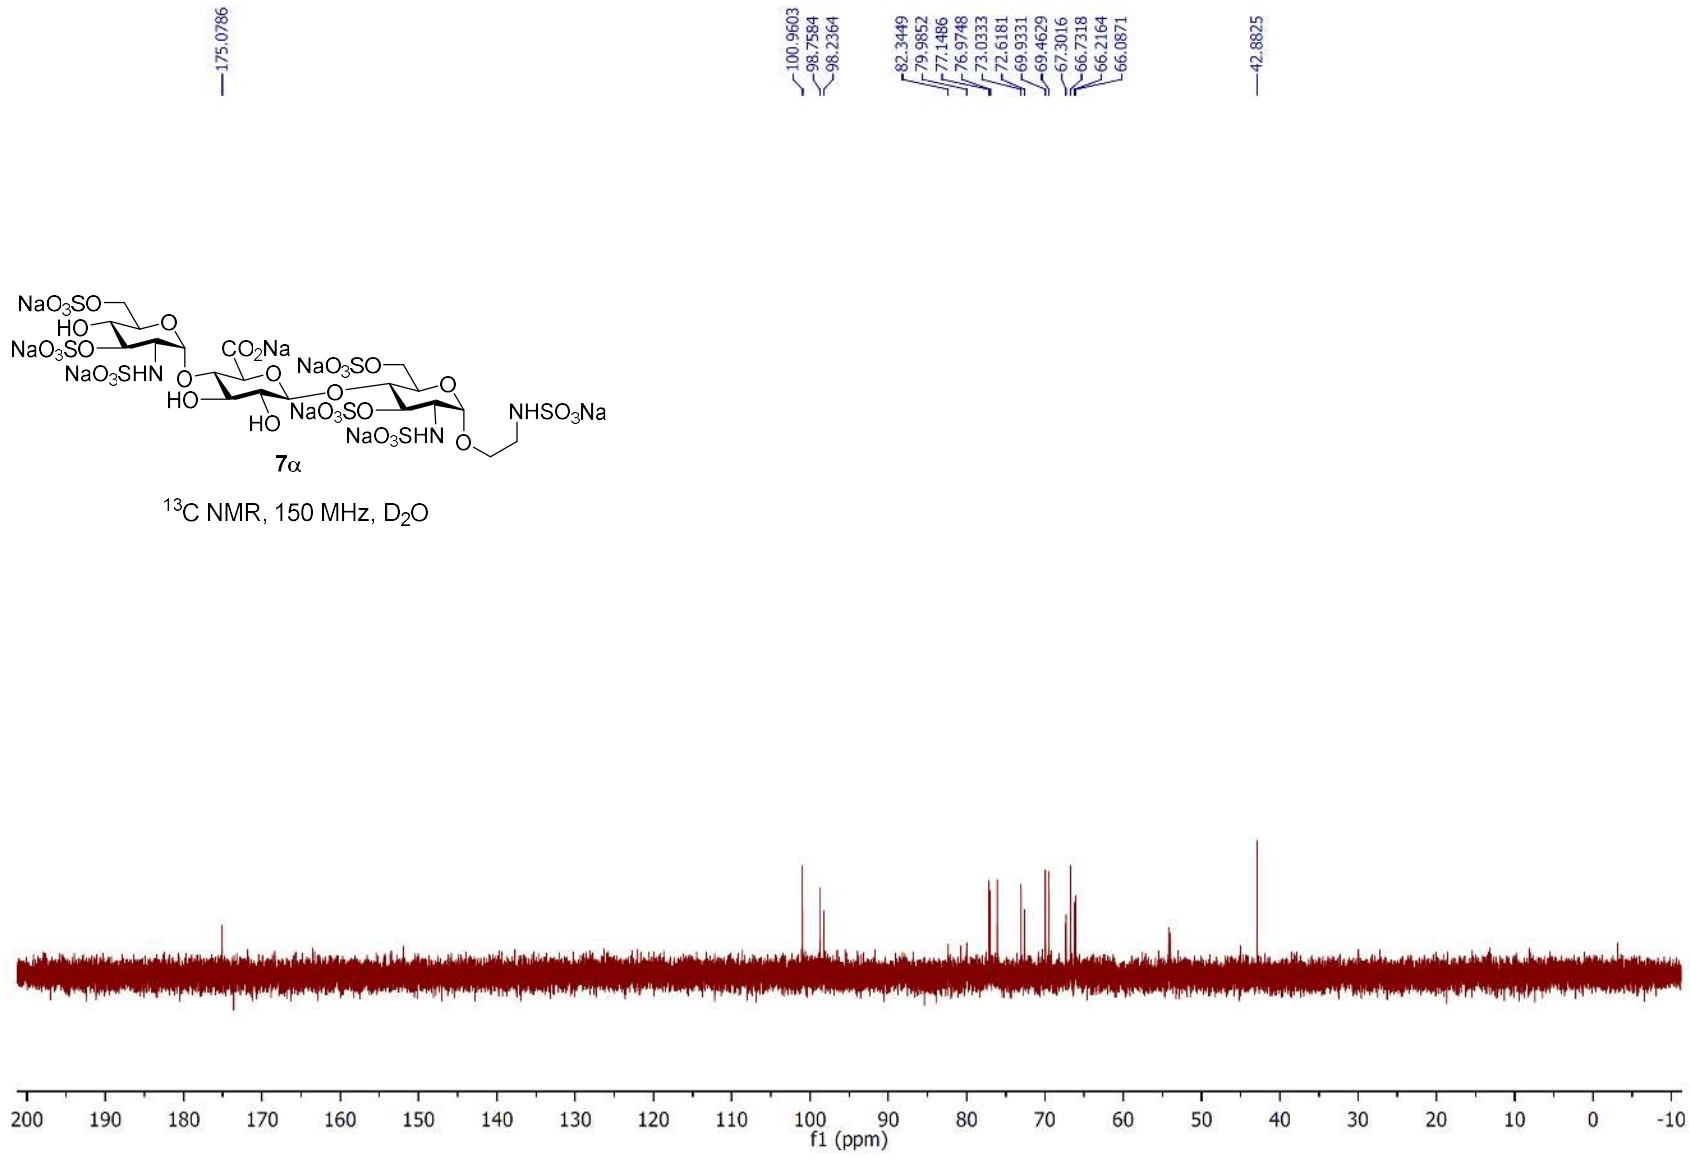

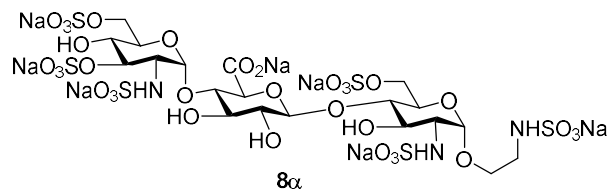

$^1\text{H}$  NMR, 600 MHz,  $\text{D}_2\text{O}$

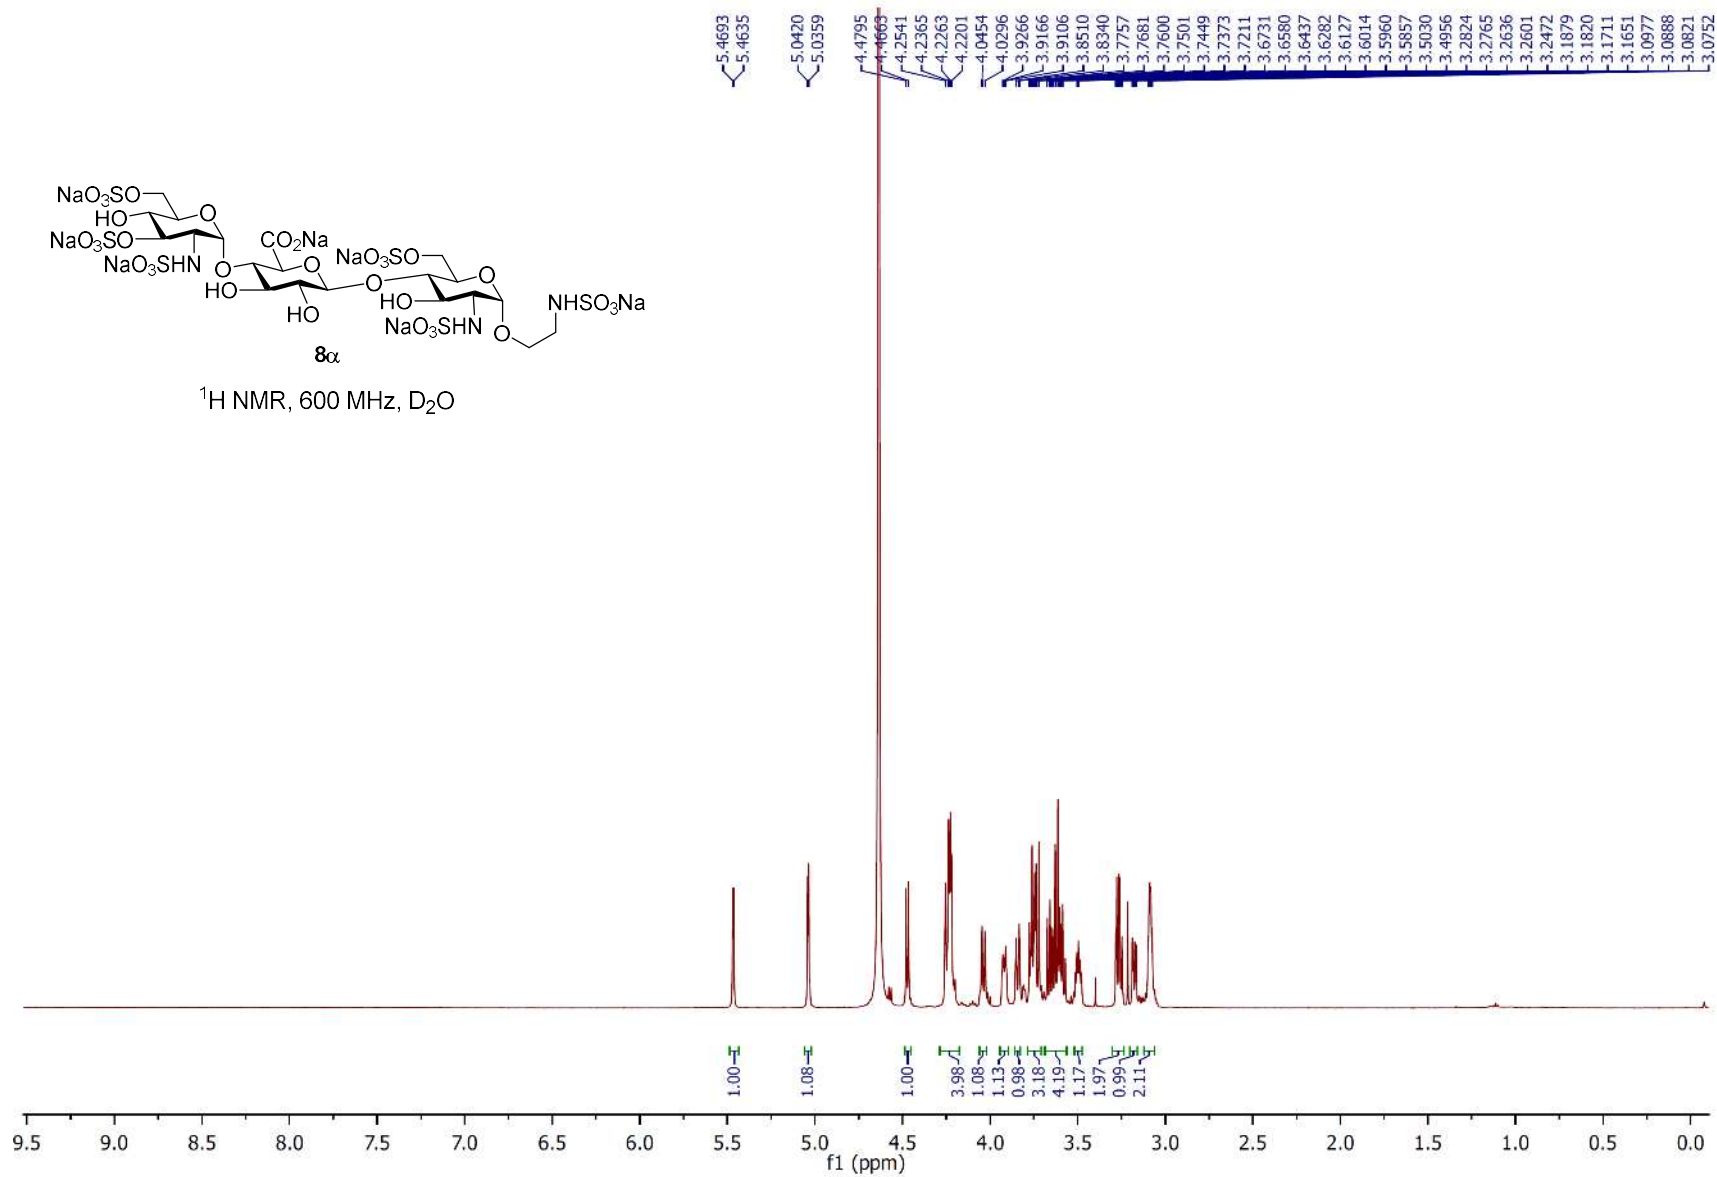

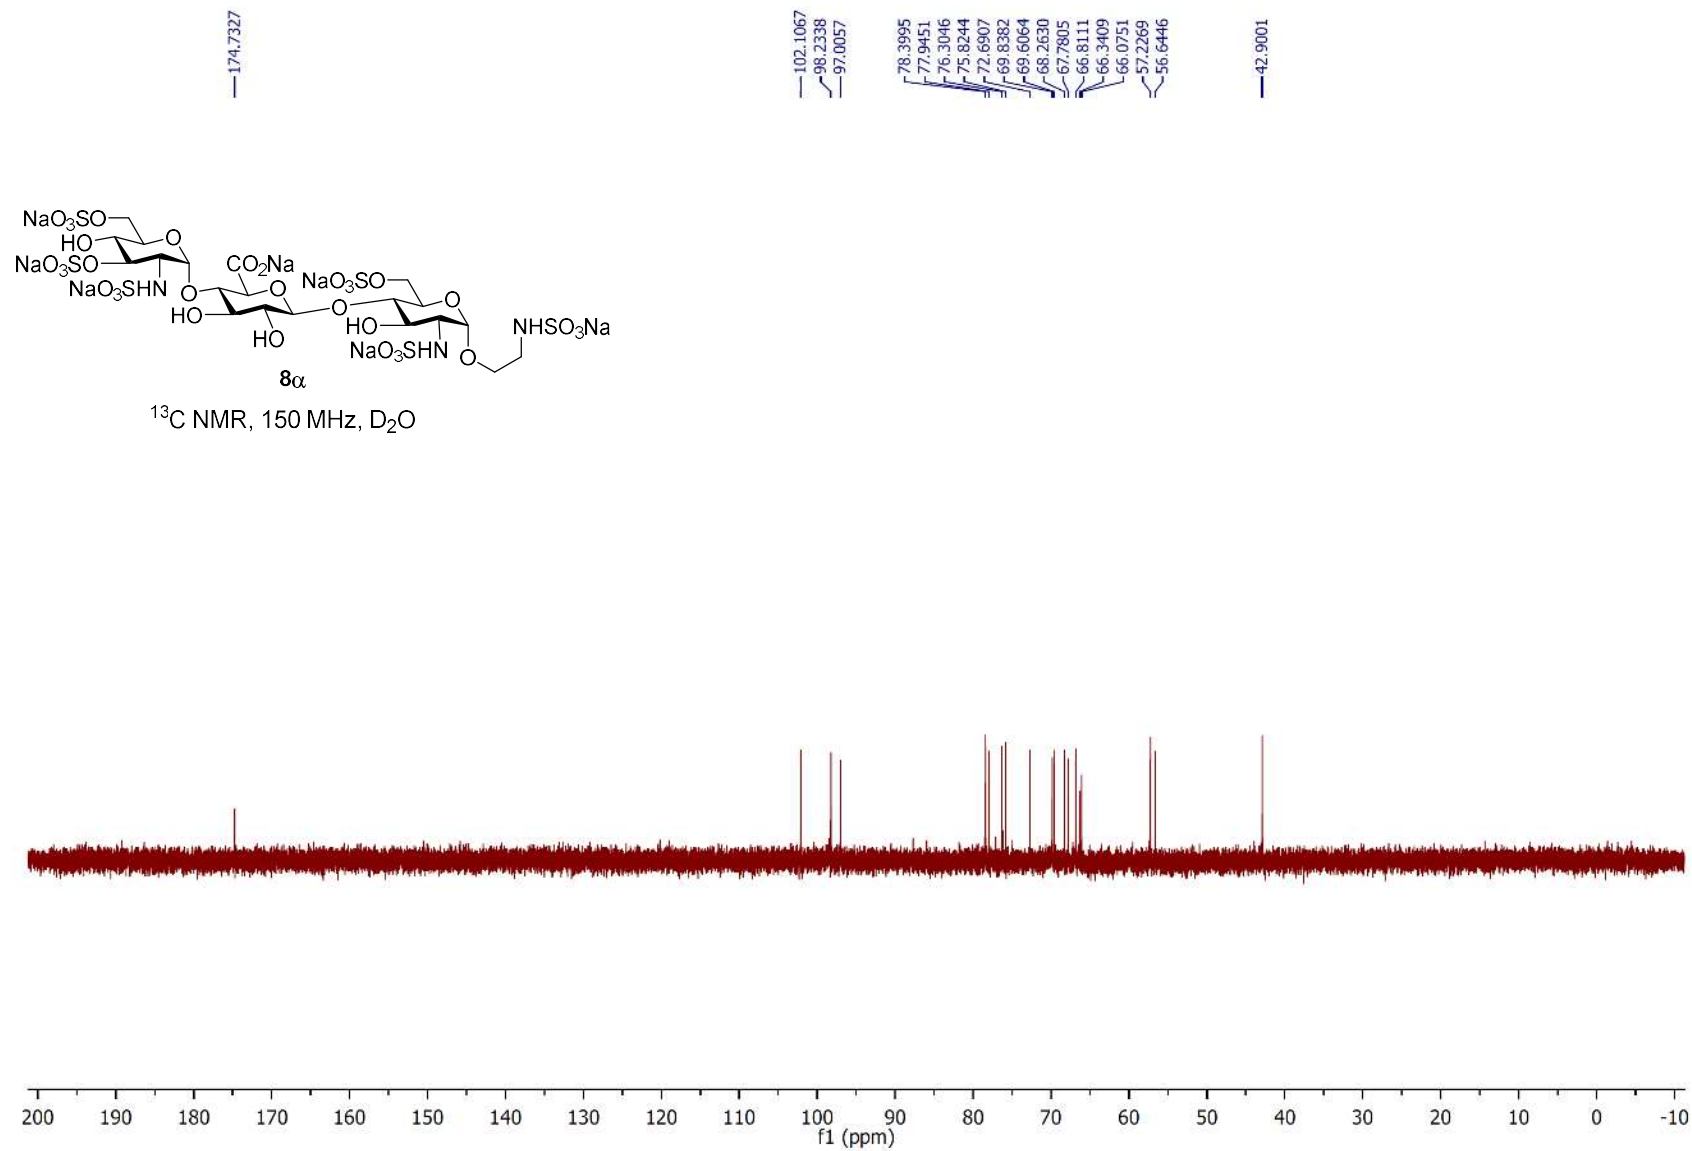

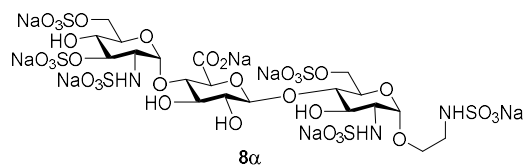

$^1\text{H}$ - $^{13}\text{C}$  HSQC, 600/150MHz,  $\text{D}_2\text{O}$

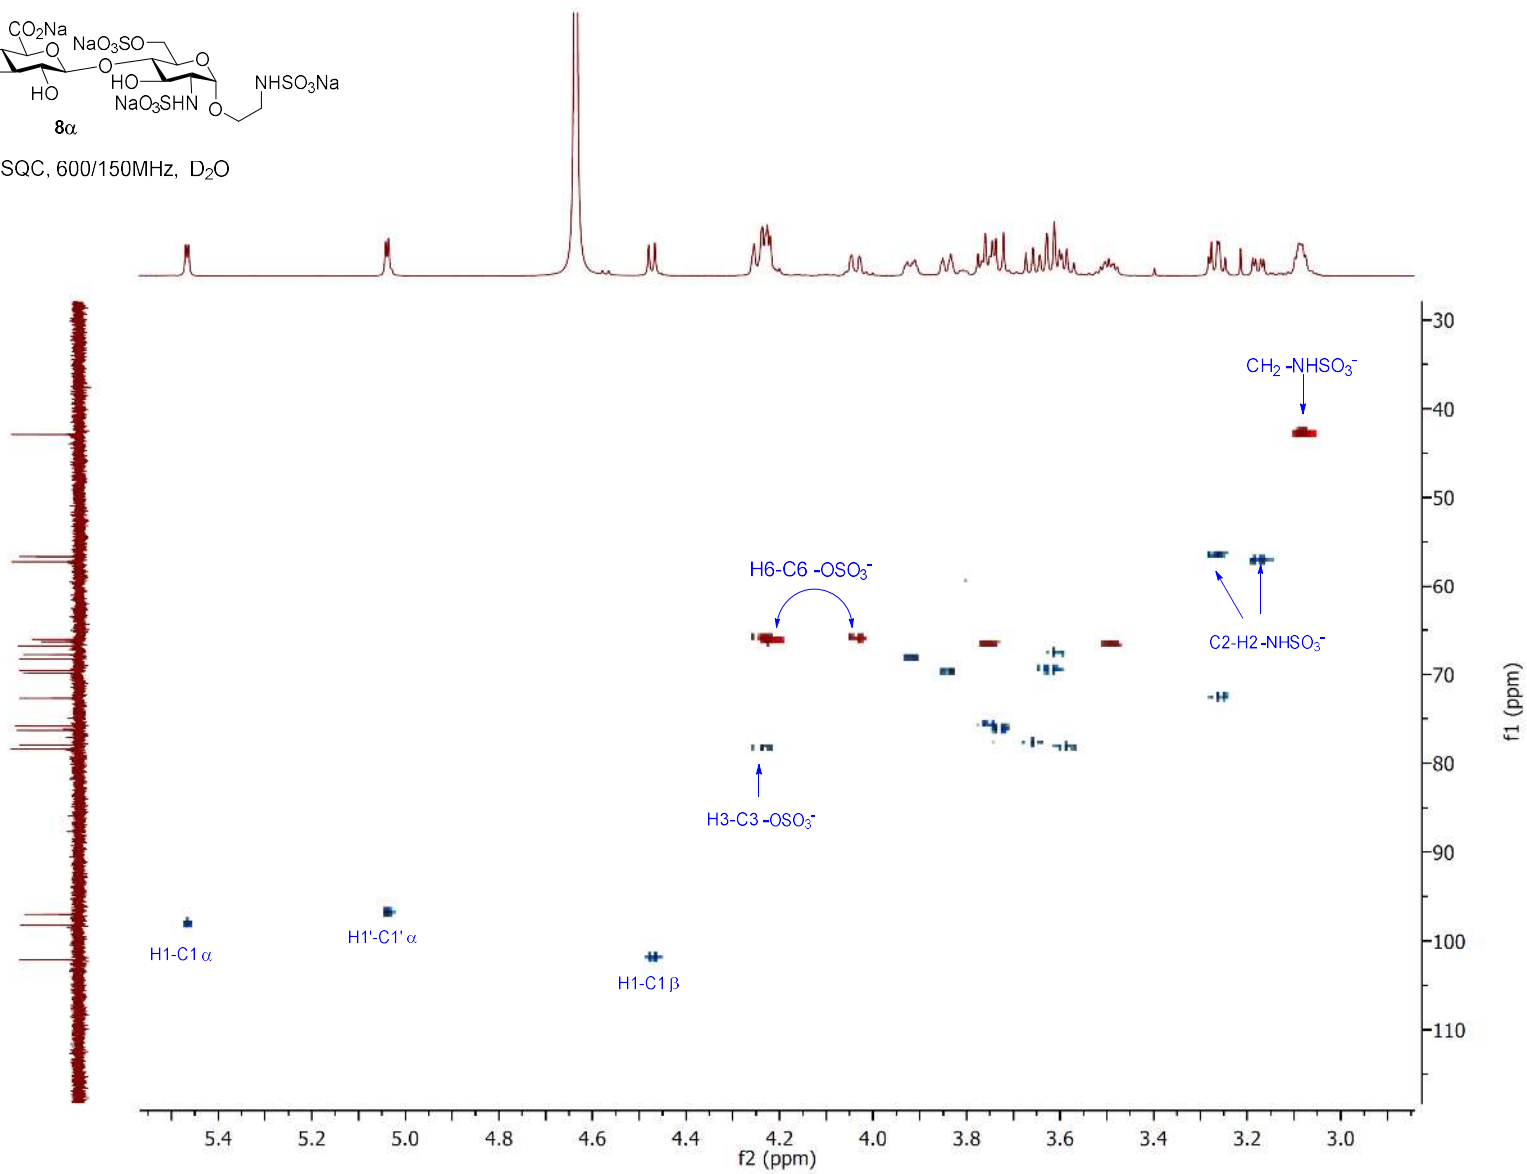



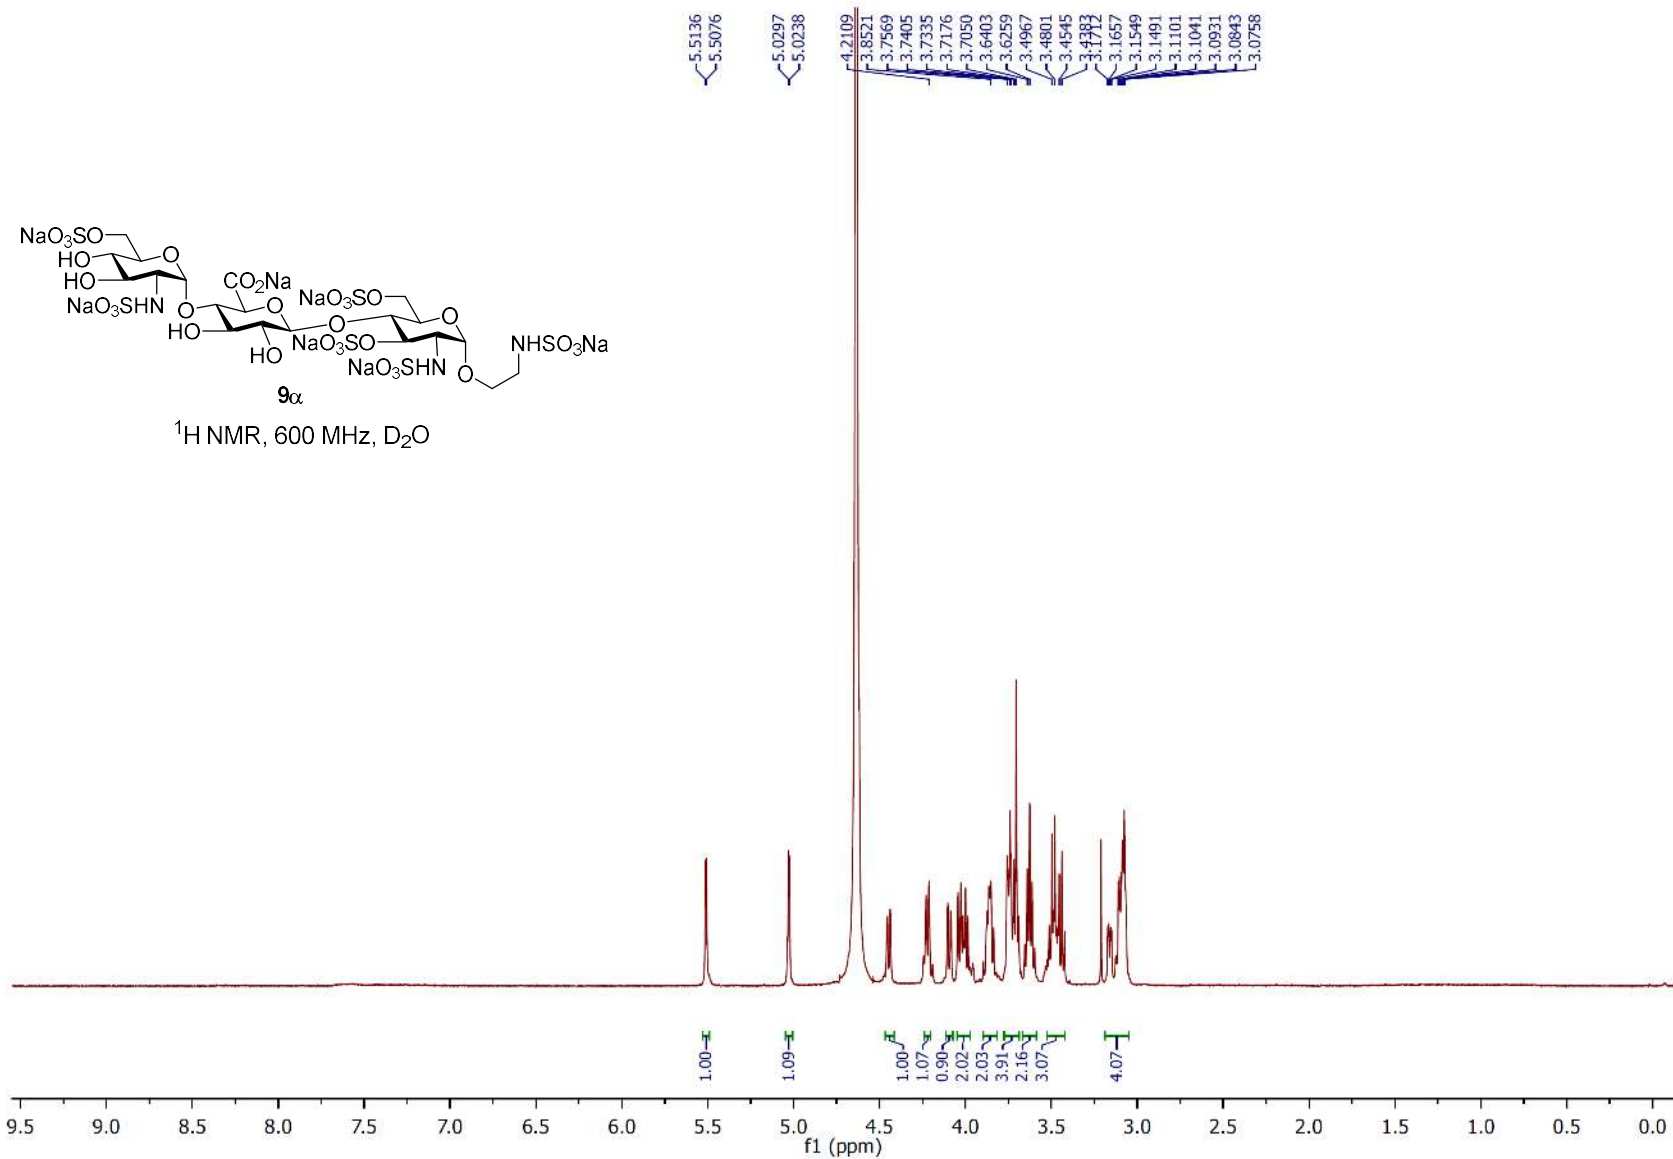

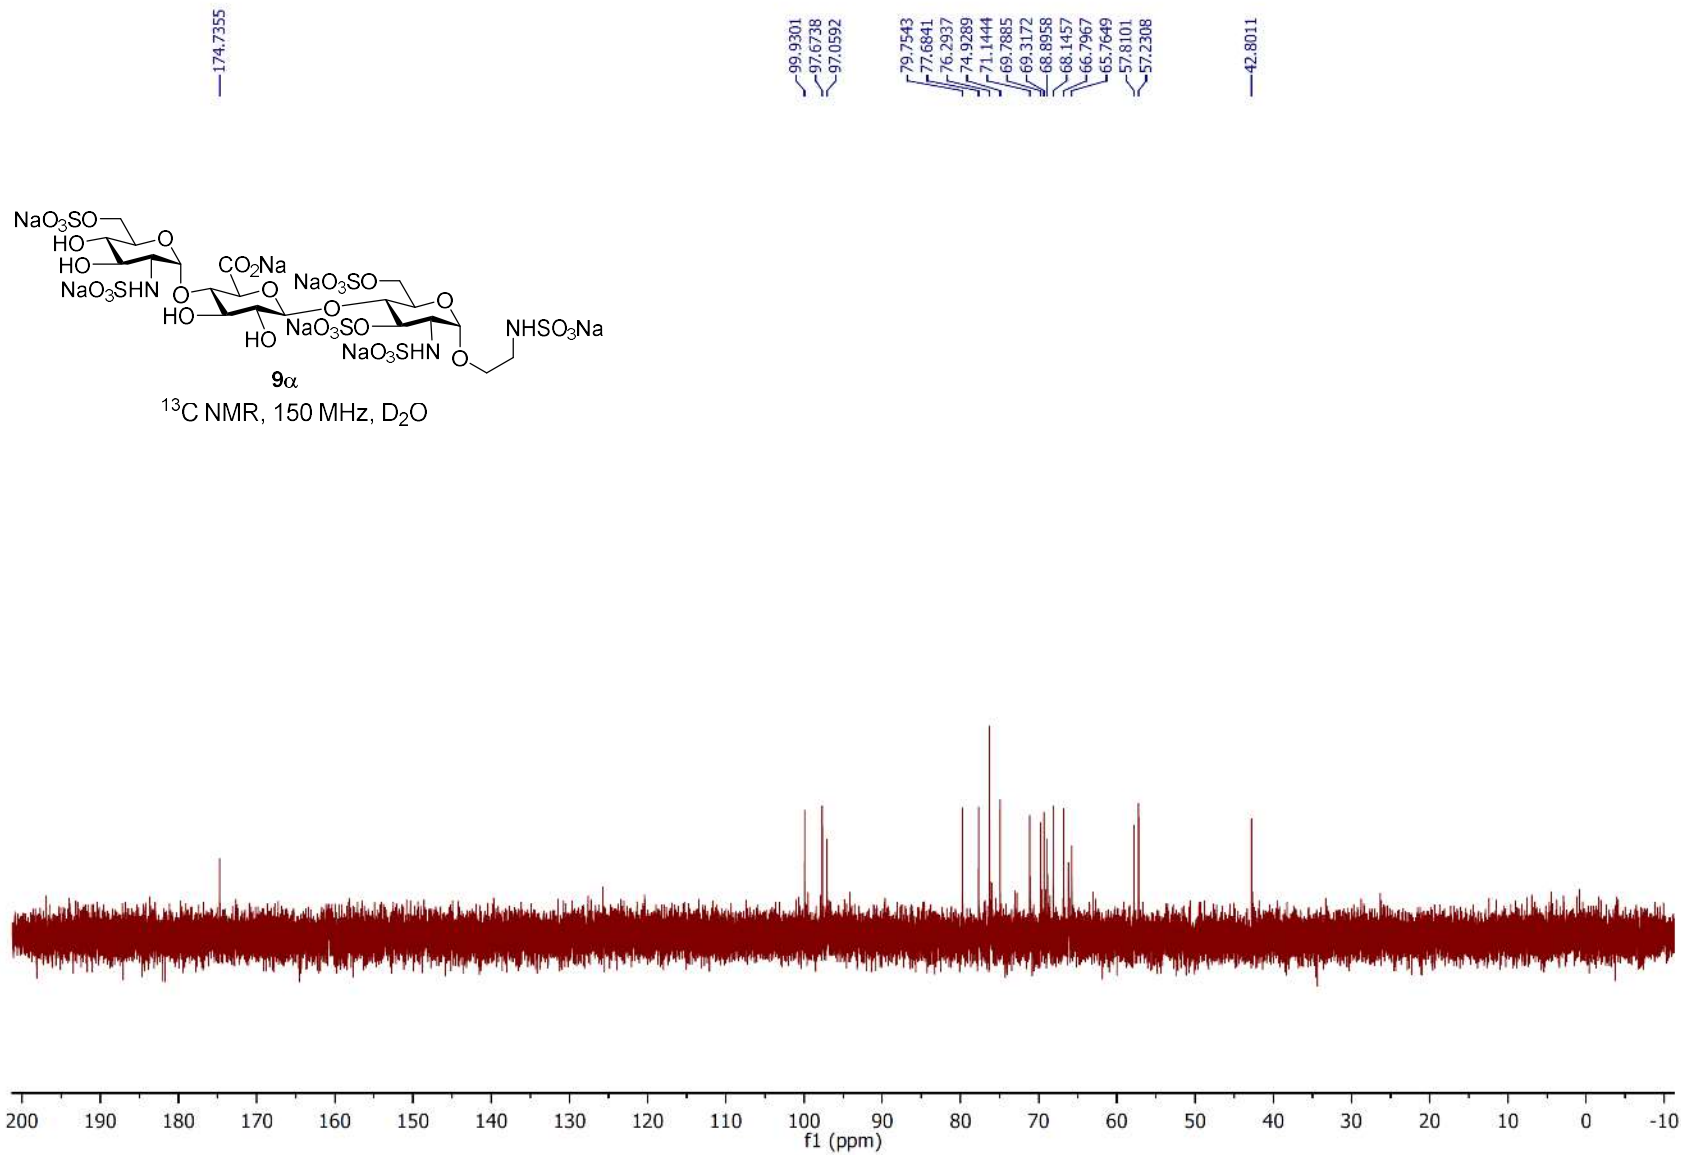

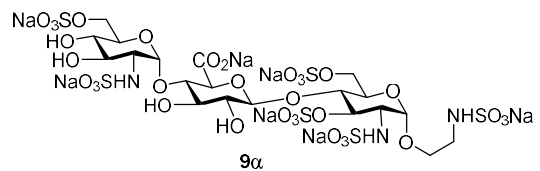

$^1\text{H}$ - $^{13}\text{C}$  HSQC, 600/150MHz,  $\text{D}_2\text{O}$

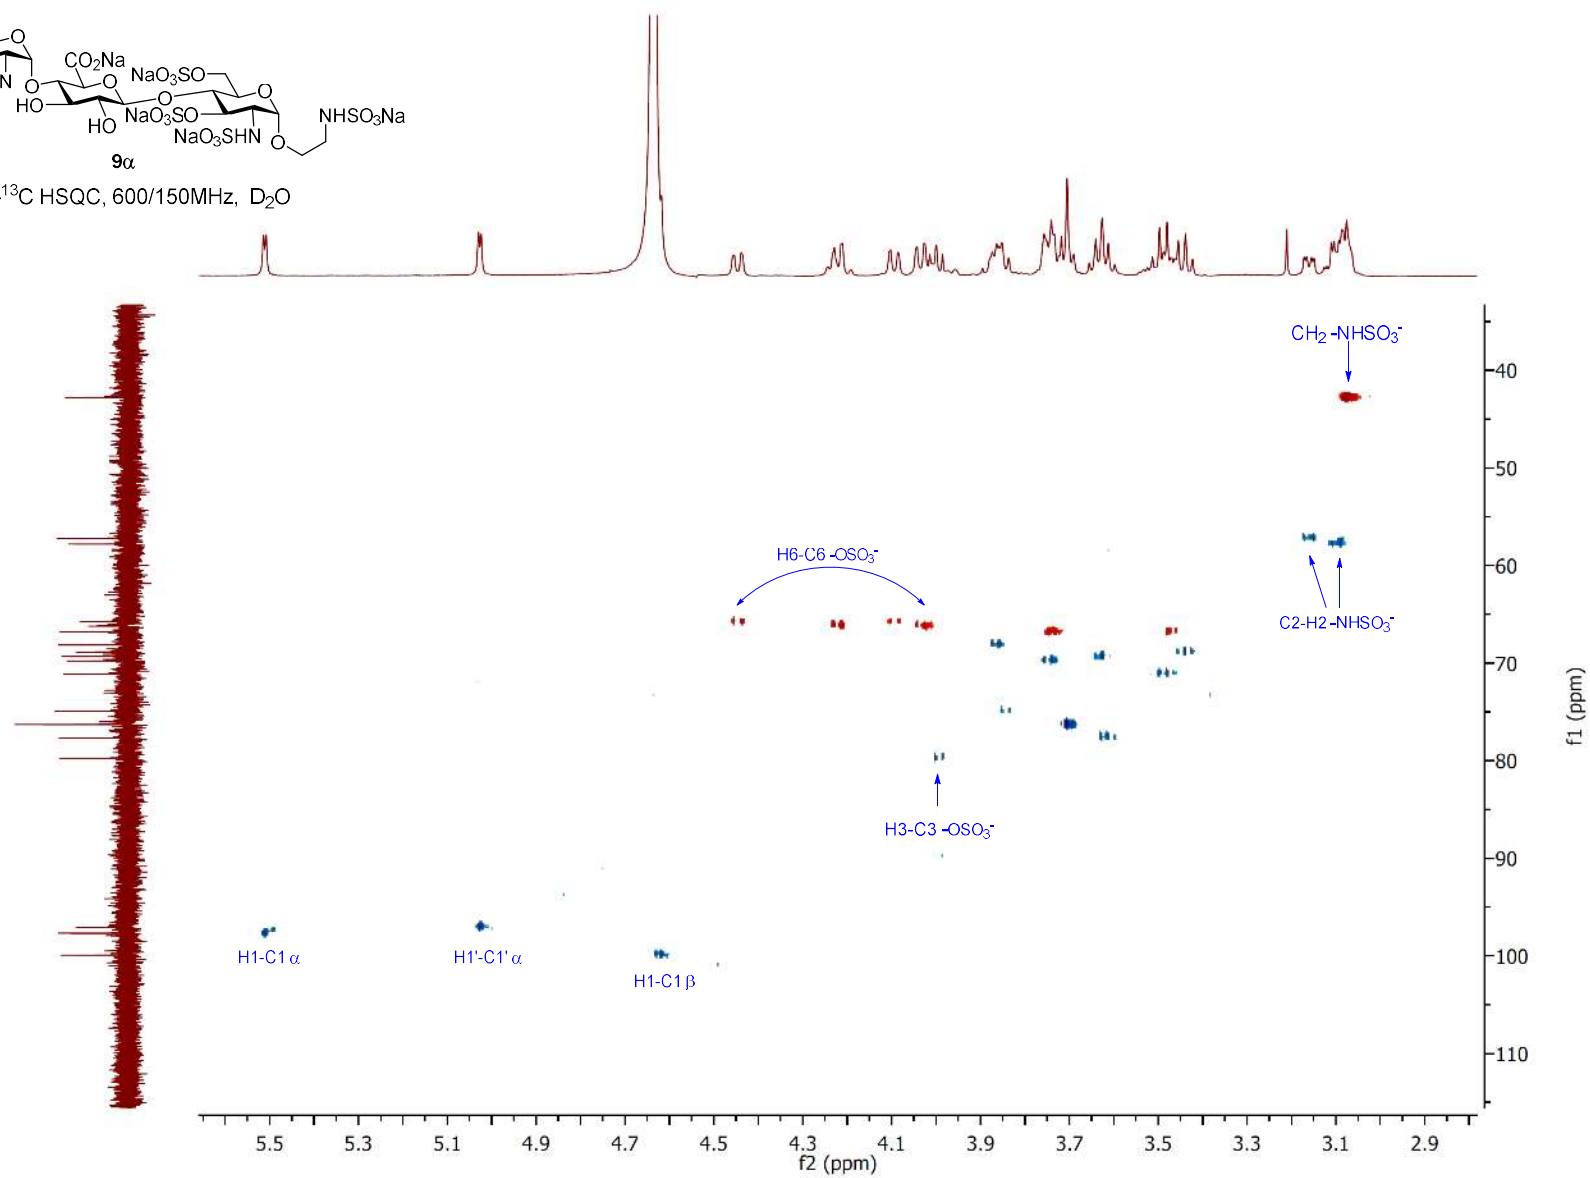

Supplement: NIHMS1609521-supplement-Supporting_Information.pdf [file NIHMS1609521-supplement-Supporting_Information.pdf]
